# Supplementary material for: Single-Cell Transcriptomic Profiling Identifies Molecular Phenotypes of Newborn Human Lung Cells
Source: MDPI journal article supplement (doi:10.3390/genes15030298), 2024-02-26

# Single-Cell Transcriptomic Profiling Identifies Molecular Phenotypes of Newborn Human Lung Cells

Soumyaroop Bhattacharya <sup>1,\*</sup>, Jacquelyn A. Myers <sup>2,†</sup>, Cameron Baker <sup>2</sup>, Minzhe Guo <sup>3</sup>, Soula Danopoulos <sup>4</sup>, Jason R. Myers <sup>2,†</sup>, Gautam Bandyopadhyay <sup>1</sup>, Stephen T. Romas <sup>1</sup>, Heidie L. Huyck <sup>1</sup>, Ravi S. Misra <sup>1</sup>, Jennifer Dutra <sup>5</sup>, Jeanne Holden-Wiltse <sup>5,6</sup>, Andrew N. McDavid <sup>6</sup>, John M. Ashton <sup>2</sup>, Denise Al Alam <sup>4</sup>, S. Steven Potter <sup>3</sup>, Jeffrey A. Whitsett <sup>3</sup>, Yan Xu <sup>3</sup>, Gloria S. Pryhuber <sup>1</sup> and Thomas J. Mariani <sup>1</sup>

<sup>1</sup> Department of Pediatrics, University of Rochester Medical Center, Rochester, NY 14642, USA; gautam\_bandyopadhyay@urmc.rochester.edu (G.B.); stephen\_romas@urmc.rochester.edu (S.T.R.); heidie\_huyck@urmc.rochester.edu (H.L.H.); ravi\_misra@urmc.rochester.edu (R.S.M.); gloria\_pryhuber@urmc.rochester.edu (G.S.P.); tom\_mariani@urmc.rochester.edu (T.J.M.)

<sup>2</sup> Genomic Research Center, University of Rochester Medical Center, Rochester, NY 14642, USA; jacquelyn.myers@stjude.org (J.A.M.); cameron\_baker@urmc.rochester.edu (C.B.); jason.myers@stjude.org (J.R.M.); john\_ashton@urmc.rochester.edu (J.M.A.)

<sup>3</sup> Department of Pediatrics, Cincinnati Children's Hospital Medical Center, Cincinnati, OH 45219, USA; minzhe.guo@cchmc.org (M.G.); steve.potter@cchmc.org (S.S.P.); jeffrey.whitsett@cchmc.org (J.A.W.); yan.xu@cchmc.org (Y.X.)

<sup>4</sup> Lundquist Institute for Biomedical Innovation, Harbor-UCLA Medical Center, University of California Los Angeles, Los Angeles, CA 90024, USA; soula.danopoulos@lundquist.org (S.D.); denise.alalam@lundquist.org (D.A.A.)

<sup>5</sup> Clinical & Translational Science Institute, University of Rochester, Rochester, NY 14642, USA; jennifer\_dutra@urmc.rochester.edu (J.D.); jeanne\_wiltse@urmc.rochester.edu (J.H.-W.)

<sup>6</sup> Department of Biostatistics and Computational Biology, University of Rochester Medical Center, Rochester, NY 14642, USA; andrew\_mcdavid@urmc.rochester.edu

\* Correspondence: soumyaroop\_bhattacharya@urmc.rochester.edu; Tel.: +1-585-276-4683; Fax: +1-585-276-2642

† Currently at St Jude Children's Research Hospital, Memphis, TN 38105, USA.

**Keywords:** single-cell RNAseq; matrix fibroblast; lung development; newborn lung

No. of Tables: 0

No. of Figures: 6

No. of Supplemental Tables: 11

No. of Supplemental Figures: 10

This work was supported by the Human Developing Lung Molecular Atlas Program (LungMAP) funded by National Heart, Lung, and Blood Institute of National Institutes of Health (U01HL122700 to G.S.P. and U01HL122642 to J.A.W.).

Table S1: Distribution of human cells by sample source and capture

| Cluster | Major Type  | Subtype            | Donor1<br>Run1 | Donor1<br>Run2 | Donor2<br>Run1 | Donor2<br>Run2 | Total |
|---------|-------------|--------------------|----------------|----------------|----------------|----------------|-------|
| 0       | Mesenchymal | Myofibroblasts     | 299            | 267            | 153            | 101            | 820   |
| 1       | Mesenchymal | Matrix Fibroblasts | 157            | 123            | 342            | 192            | 814   |
| 2       | Mesenchymal | Smooth Muscle Cell | 237            | 173            | 114            | 68             | 592   |
| 4       | Mesenchymal | Pericytes          | 82             | 147            | 162            | 119            | 510   |
| 5       | Mesenchymal | Stromal Cells      | 87             | 72             | 172            | 88             | 419   |
| 6       | Mesenchymal | Pericytes          | 121            | 110            | 100            | 67             | 398   |
| 3       | Endothelial | Endothelial Type B | 59             | 107            | 159            | 242            | 567   |
| 8       | Endothelial | Endothelial Type B | 70             | 96             | 87             | 68             | 321   |
| 10      | Endothelial | Endothelial Type C | 40             | 71             | 20             | 15             | 146   |
| 12      | Endothelial | Endothelial Type B | 27             | 28             | 15             | 15             | 85    |
| 7       | Immune      | Macrophages        | 180            | 144            | 14             | 11             | 349   |
| 9       | Immune      | T-Cells            | 83             | 58             | 32             | 17             | 190   |
| 13      | Immune      | B-Cells            | 29             | 23             | 17             | 10             | 79    |
| 11      | Epithelial  | AT1 Epithelial     | 44             | 29             | 34             | 24             | 131   |
| 14      | Epithelial  | AT2 Epithelial     | 0              | 38             | 0              | 40             | 78    |
| Total   |             |                    | 1515           | 1486           | 1421           | 1077           | 5499  |

Table S2: Marker genes for individual clusters of cells from newborn human cells

| <i>Genes</i>     | Average Log Fold Change | Unadjusted P-value | Adjusted P-Value | Proportion of cells in Group 1 | Proportion of cells in Group 2 | Cluster No | Sub-Type       |
|------------------|-------------------------|--------------------|------------------|--------------------------------|--------------------------------|------------|----------------|
| <i>ACTG2</i>     | 2.61                    | 0.00               | 0.00             | 0.94                           | 0.19                           | 0          | Myofibroblasts |
| <i>DES</i>       | 2.6                     | 0.00               | 0.00             | 0.87                           | 0.10                           | 0          | Myofibroblasts |
| <i>ACTA2</i>     | 2.15                    | 0.00               | 0.00             | 1.00                           | 0.70                           | 0          | Myofibroblasts |
| <i>TAGLN</i>     | 2.05                    | 0.00               | 0.00             | 0.99                           | 0.56                           | 0          | Myofibroblasts |
| <i>CNN1</i>      | 1.98                    | 0.00               | 0.00             | 0.84                           | 0.11                           | 0          | Myofibroblasts |
| <i>MYLK</i>      | 1.93                    | 0.00               | 0.00             | 0.95                           | 0.42                           | 0          | Myofibroblasts |
| <i>MYH11</i>     | 1.86                    | 0.00               | 0.00             | 0.97                           | 0.31                           | 0          | Myofibroblasts |
| <i>HHIP</i>      | 1.81                    | 0.00               | 0.00             | 0.62                           | 0.04                           | 0          | Myofibroblasts |
| <i>FILIP1L</i>   | 1.45                    | 0.00               | 0.00             | 0.75                           | 0.20                           | 0          | Myofibroblasts |
| <i>RAMP1</i>     | 1.45                    | 0.00               | 0.00             | 0.57                           | 0.10                           | 0          | Myofibroblasts |
| <i>FGF18</i>     | 1.39                    | 0.00               | 0.00             | 0.57                           | 0.04                           | 0          | Myofibroblasts |
| <i>CKB</i>       | 1.36                    | 0.00               | 0.00             | 0.63                           | 0.16                           | 0          | Myofibroblasts |
| <i>TPM2</i>      | 1.36                    | 0.00               | 0.00             | 0.99                           | 0.61                           | 0          | Myofibroblasts |
| <i>MT1X</i>      | 1.31                    | 0.00               | 0.00             | 0.48                           | 0.16                           | 0          | Myofibroblasts |
| <i>FLNA</i>      | 1.22                    | 0.00               | 0.00             | 0.89                           | 0.42                           | 0          | Myofibroblasts |
| <i>TNFRSF12A</i> | 1.16                    | 0.00               | 0.00             | 0.44                           | 0.12                           | 0          | Myofibroblasts |
| <i>PDLIM7</i>    | 1.16                    | 0.00               | 0.00             | 0.81                           | 0.31                           | 0          | Myofibroblasts |
| <i>LPP</i>       | 1.14                    | 0.00               | 0.00             | 0.75                           | 0.28                           | 0          | Myofibroblasts |
| <i>MYL9</i>      | 1.12                    | 0.00               | 0.00             | 0.98                           | 0.67                           | 0          | Myofibroblasts |
| <i>SYNPO2</i>    | 1.07                    | 0.00               | 0.00             | 0.52                           | 0.07                           | 0          | Myofibroblasts |
| <i>LTBP1</i>     | 1.06                    | 0.00               | 0.00             | 0.61                           | 0.17                           | 0          | Myofibroblasts |
| <i>TPM1</i>      | 1.05                    | 0.00               | 0.00             | 0.91                           | 0.55                           | 0          | Myofibroblasts |
| <i>SCX</i>       | 1.05                    | 0.00               | 0.00             | 0.37                           | 0.01                           | 0          | Myofibroblasts |
| <i>DSTN</i>      | 1.04                    | 0.00               | 0.00             | 0.99                           | 0.76                           | 0          | Myofibroblasts |
| <i>SELM</i>      | 1.02                    | 0.00               | 0.00             | 0.79                           | 0.44                           | 0          | Myofibroblasts |
| <i>MGP</i>       | 1.02                    | 0.00               | 0.00             | 0.80                           | 0.63                           | 0          | Myofibroblasts |
| <i>CARMN</i>     | 1.01                    | 0.00               | 0.00             | 0.76                           | 0.28                           | 0          | Myofibroblasts |
| <i>CLU</i>       | 1                       | 0.00               | 0.00             | 0.77                           | 0.25                           | 0          | Myofibroblasts |
| <i>CSRP1</i>     | 0.97                    | 0.00               | 0.00             | 0.92                           | 0.55                           | 0          | Myofibroblasts |
| <i>LMCD1</i>     | 0.96                    | 0.00               | 0.00             | 0.74                           | 0.32                           | 0          | Myofibroblasts |
| <i>TGFB1</i>     | 0.96                    | 0.00               | 0.00             | 0.59                           | 0.32                           | 0          | Myofibroblasts |
| <i>NEXN</i>      | 0.96                    | 0.00               | 0.00             | 0.61                           | 0.16                           | 0          | Myofibroblasts |
| <i>IGFBP5</i>    | 0.95                    | 0.00               | 0.00             | 0.54                           | 0.26                           | 0          | Myofibroblasts |
| <i>PDLIM3</i>    | 0.94                    | 0.00               | 0.00             | 0.68                           | 0.23                           | 0          | Myofibroblasts |
| <i>LDLRAD4</i>   | 0.93                    | 0.00               | 0.00             | 0.42                           | 0.05                           | 0          | Myofibroblasts |
| <i>GREM2</i>     | 0.89                    | 0.00               | 0.00             | 0.37                           | 0.01                           | 0          | Myofibroblasts |
| <i>CTGF</i>      | 0.89                    | 0.00               | 0.00             | 0.47                           | 0.18                           | 0          | Myofibroblasts |
| <i>CALD1</i>     | 0.89                    | 0.00               | 0.00             | 0.98                           | 0.76                           | 0          | Myofibroblasts |

|                 |      |      |      |      |      |   |                |
|-----------------|------|------|------|------|------|---|----------------|
| <i>NDUFS5</i>   | 0.87 | 0.00 | 0.00 | 0.93 | 0.71 | 0 | Myofibroblasts |
| <i>HSPB1</i>    | 0.87 | 0.00 | 0.00 | 0.94 | 0.74 | 0 | Myofibroblasts |
| <i>KCNMB1</i>   | 0.87 | 0.00 | 0.00 | 0.46 | 0.06 | 0 | Myofibroblasts |
| <i>LMNA</i>     | 0.87 | 0.00 | 0.00 | 0.88 | 0.64 | 0 | Myofibroblasts |
| <i>THBS1</i>    | 0.85 | 0.00 | 0.00 | 0.37 | 0.13 | 0 | Myofibroblasts |
| <i>PALLD</i>    | 0.83 | 0.00 | 0.00 | 0.59 | 0.18 | 0 | Myofibroblasts |
| <i>SEMA3C</i>   | 0.83 | 0.00 | 0.00 | 0.46 | 0.07 | 0 | Myofibroblasts |
| <i>SVIL</i>     | 0.82 | 0.00 | 0.00 | 0.51 | 0.14 | 0 | Myofibroblasts |
| <i>BAG2</i>     | 0.81 | 0.00 | 0.00 | 0.47 | 0.11 | 0 | Myofibroblasts |
| <i>CRYAB</i>    | 0.81 | 0.00 | 0.00 | 0.69 | 0.29 | 0 | Myofibroblasts |
| <i>HHIP-AS1</i> | 0.8  | 0.00 | 0.00 | 0.40 | 0.02 | 0 | Myofibroblasts |
| <i>SAMD11</i>   | 0.78 | 0.00 | 0.00 | 0.37 | 0.03 | 0 | Myofibroblasts |
| <i>FSTL3</i>    | 0.78 | 0.00 | 0.00 | 0.39 | 0.08 | 0 | Myofibroblasts |
| <i>SMTN</i>     | 0.78 | 0.00 | 0.00 | 0.58 | 0.24 | 0 | Myofibroblasts |
| <i>RHOB</i>     | 0.77 | 0.00 | 0.00 | 0.77 | 0.43 | 0 | Myofibroblasts |
| <i>ALDH1B1</i>  | 0.74 | 0.00 | 0.00 | 0.34 | 0.04 | 0 | Myofibroblasts |
| <i>CNN3</i>     | 0.74 | 0.00 | 0.00 | 0.78 | 0.56 | 0 | Myofibroblasts |
| <i>SPEG</i>     | 0.73 | 0.00 | 0.00 | 0.42 | 0.07 | 0 | Myofibroblasts |
| <i>SCARA3</i>   | 0.73 | 0.00 | 0.00 | 0.39 | 0.07 | 0 | Myofibroblasts |
| <i>PMEPA1</i>   | 0.72 | 0.00 | 0.00 | 0.39 | 0.11 | 0 | Myofibroblasts |
| <i>C9orf3</i>   | 0.71 | 0.00 | 0.00 | 0.58 | 0.27 | 0 | Myofibroblasts |
| <i>THBS2</i>    | 0.71 | 0.00 | 0.00 | 0.32 | 0.06 | 0 | Myofibroblasts |
| <i>TUBB2A</i>   | 0.71 | 0.00 | 0.00 | 0.38 | 0.13 | 0 | Myofibroblasts |
| <i>FHL1</i>     | 0.7  | 0.00 | 0.00 | 0.86 | 0.53 | 0 | Myofibroblasts |
| <i>LMOD1</i>    | 0.68 | 0.00 | 0.00 | 0.42 | 0.10 | 0 | Myofibroblasts |
| <i>TGFB11</i>   | 0.68 | 0.00 | 0.00 | 0.72 | 0.37 | 0 | Myofibroblasts |
| <i>BCHE</i>     | 0.67 | 0.00 | 0.00 | 0.39 | 0.13 | 0 | Myofibroblasts |
| <i>SLMAP</i>    | 0.66 | 0.00 | 0.00 | 0.40 | 0.14 | 0 | Myofibroblasts |
| <i>MRPS6</i>    | 0.66 | 0.00 | 0.00 | 0.57 | 0.29 | 0 | Myofibroblasts |
| <i>MYOCD</i>    | 0.66 | 0.00 | 0.00 | 0.34 | 0.05 | 0 | Myofibroblasts |
| <i>SBSPON</i>   | 0.66 | 0.00 | 0.00 | 0.31 | 0.06 | 0 | Myofibroblasts |
| <i>NDUFA4</i>   | 0.65 | 0.00 | 0.00 | 0.95 | 0.78 | 0 | Myofibroblasts |
| <i>ACTN1</i>    | 0.65 | 0.00 | 0.00 | 0.70 | 0.40 | 0 | Myofibroblasts |
| <i>IGF1</i>     | 0.65 | 0.00 | 0.00 | 0.31 | 0.05 | 0 | Myofibroblasts |
| <i>TGFBR3</i>   | 0.65 | 0.00 | 0.00 | 0.38 | 0.10 | 0 | Myofibroblasts |
| <i>TUBB6</i>    | 0.63 | 0.00 | 0.00 | 0.51 | 0.28 | 0 | Myofibroblasts |
| <i>ID4</i>      | 0.63 | 0.00 | 0.00 | 0.59 | 0.21 | 0 | Myofibroblasts |
| <i>NUPR1</i>    | 0.62 | 0.00 | 0.00 | 0.81 | 0.45 | 0 | Myofibroblasts |
| <i>SH3PXD2A</i> | 0.61 | 0.00 | 0.00 | 0.45 | 0.18 | 0 | Myofibroblasts |
| <i>SPARCL1</i>  | 0.61 | 0.00 | 0.00 | 0.91 | 0.63 | 0 | Myofibroblasts |
| <i>BOC</i>      | 0.61 | 0.00 | 0.00 | 0.30 | 0.04 | 0 | Myofibroblasts |
| <i>BTG3</i>     | 0.6  | 0.00 | 0.00 | 0.47 | 0.20 | 0 | Myofibroblasts |
| <i>WSB1</i>     | 0.6  | 0.00 | 0.00 | 0.83 | 0.63 | 0 | Myofibroblasts |

|                      |      |      |      |      |      |   |                |
|----------------------|------|------|------|------|------|---|----------------|
| <i>MYL6</i>          | 0.6  | 0.00 | 0.00 | 1.00 | 0.98 | 0 | Myofibroblasts |
| <i>PDLIM4</i>        | 0.6  | 0.00 | 0.00 | 0.32 | 0.07 | 0 | Myofibroblasts |
| <i>PPP1R12B</i>      | 0.6  | 0.00 | 0.00 | 0.45 | 0.17 | 0 | Myofibroblasts |
| <i>MYADM</i>         | 0.59 | 0.00 | 0.00 | 0.61 | 0.34 | 0 | Myofibroblasts |
| <i>CRISPLD2</i>      | 0.59 | 0.00 | 0.00 | 0.44 | 0.20 | 0 | Myofibroblasts |
| <i>TACC2</i>         | 0.59 | 0.00 | 0.00 | 0.31 | 0.05 | 0 | Myofibroblasts |
| <i>CORO1C</i>        | 0.59 | 0.00 | 0.00 | 0.43 | 0.17 | 0 | Myofibroblasts |
| <i>ADAMTS6</i>       | 0.57 | 0.00 | 0.00 | 0.35 | 0.08 | 0 | Myofibroblasts |
| <i>HSPB7</i>         | 0.57 | 0.00 | 0.00 | 0.32 | 0.06 | 0 | Myofibroblasts |
| <i>AP000892.6</i>    | 0.56 | 0.00 | 0.00 | 0.26 | 0.04 | 0 | Myofibroblasts |
| <i>COL4A5</i>        | 0.55 | 0.00 | 0.00 | 0.36 | 0.10 | 0 | Myofibroblasts |
| <i>TUBA1A</i>        | 0.55 | 0.00 | 0.00 | 0.89 | 0.78 | 0 | Myofibroblasts |
| <i>LGALS3</i>        | 0.54 | 0.00 | 0.00 | 0.54 | 0.34 | 0 | Myofibroblasts |
| <i>ANTXR1</i>        | 0.54 | 0.00 | 0.00 | 0.46 | 0.20 | 0 | Myofibroblasts |
| <i>FHL2</i>          | 0.54 | 0.00 | 0.00 | 0.31 | 0.07 | 0 | Myofibroblasts |
| <i>COL16A1</i>       | 0.54 | 0.00 | 0.00 | 0.30 | 0.07 | 0 | Myofibroblasts |
| <i>NFIC</i>          | 0.54 | 0.00 | 0.00 | 0.59 | 0.33 | 0 | Myofibroblasts |
| <i>GEM</i>           | 0.53 | 0.00 | 0.00 | 0.37 | 0.12 | 0 | Myofibroblasts |
| <i>H2AFZ</i>         | 0.53 | 0.00 | 0.00 | 0.80 | 0.66 | 0 | Myofibroblasts |
| <i>ADAMTS8</i>       | 0.52 | 0.00 | 0.00 | 0.28 | 0.08 | 0 | Myofibroblasts |
| <i>GADD45A</i>       | 0.52 | 0.00 | 0.00 | 0.30 | 0.15 | 0 | Myofibroblasts |
| <i>IRS1</i>          | 0.52 | 0.00 | 0.00 | 0.31 | 0.08 | 0 | Myofibroblasts |
| <i>NSMCE4A</i>       | 0.51 | 0.00 | 0.00 | 0.37 | 0.15 | 0 | Myofibroblasts |
| <i>PRNP</i>          | 0.5  | 0.00 | 0.00 | 0.54 | 0.31 | 0 | Myofibroblasts |
| <i>WDR1</i>          | 0.49 | 0.00 | 0.00 | 0.56 | 0.35 | 0 | Myofibroblasts |
| <i>C11orf96</i>      | 0.49 | 0.00 | 0.00 | 0.50 | 0.26 | 0 | Myofibroblasts |
| <i>MFAP2</i>         | 0.48 | 0.00 | 0.00 | 0.47 | 0.25 | 0 | Myofibroblasts |
| <i>MEG3</i>          | 0.48 | 0.00 | 0.00 | 0.60 | 0.42 | 0 | Myofibroblasts |
| <i>RGS2</i>          | 0.48 | 0.00 | 0.00 | 0.49 | 0.29 | 0 | Myofibroblasts |
| <i>ID2</i>           | 0.47 | 0.00 | 0.00 | 0.79 | 0.59 | 0 | Myofibroblasts |
| <i>CD151</i>         | 0.47 | 0.00 | 0.00 | 0.67 | 0.52 | 0 | Myofibroblasts |
| <i>VCL</i>           | 0.47 | 0.00 | 0.00 | 0.42 | 0.19 | 0 | Myofibroblasts |
| <i>MDFI</i>          | 0.45 | 0.00 | 0.00 | 0.36 | 0.16 | 0 | Myofibroblasts |
| <i>CYR61</i>         | 0.45 | 0.00 | 0.00 | 0.40 | 0.21 | 0 | Myofibroblasts |
| <i>RAB23</i>         | 0.45 | 0.00 | 0.00 | 0.28 | 0.08 | 0 | Myofibroblasts |
| <i>CSRP2</i>         | 0.44 | 0.00 | 0.00 | 0.43 | 0.21 | 0 | Myofibroblasts |
| <i>CD9</i>           | 0.44 | 0.00 | 0.00 | 0.74 | 0.41 | 0 | Myofibroblasts |
| <i>MRGPRF</i>        | 0.43 | 0.00 | 0.00 | 0.40 | 0.18 | 0 | Myofibroblasts |
| <i>TSPAN2</i>        | 0.43 | 0.00 | 0.00 | 0.28 | 0.08 | 0 | Myofibroblasts |
| 6-Sep                | 0.42 | 0.00 | 0.00 | 0.34 | 0.19 | 0 | Myofibroblasts |
| <i>ILK</i>           | 0.42 | 0.00 | 0.00 | 0.61 | 0.41 | 0 | Myofibroblasts |
| <i>RP11-756G12.1</i> | 0.42 | 0.00 | 0.00 | 0.28 | 0.08 | 0 | Myofibroblasts |

|                   |      |      |      |      |      |   |                |
|-------------------|------|------|------|------|------|---|----------------|
| <i>FNBP1</i>      | 0.41 | 0.00 | 0.00 | 0.39 | 0.19 | 0 | Myofibroblasts |
| <i>CRY1</i>       | 0.41 | 0.00 | 0.00 | 0.28 | 0.10 | 0 | Myofibroblasts |
| <i>FAU</i>        | 0.41 | 0.00 | 0.00 | 1.00 | 0.97 | 0 | Myofibroblasts |
| <i>EEF1B2</i>     | 0.41 | 0.00 | 0.00 | 0.88 | 0.71 | 0 | Myofibroblasts |
| <i>RPL9P9</i>     | 0.41 | 0.00 | 0.00 | 0.99 | 0.94 | 0 | Myofibroblasts |
| <i>WFDC1</i>      | 0.41 | 0.00 | 0.00 | 0.43 | 0.21 | 0 | Myofibroblasts |
| <i>CENPV</i>      | 0.4  | 0.00 | 0.00 | 0.33 | 0.15 | 0 | Myofibroblasts |
| <i>NENF</i>       | 0.4  | 0.00 | 0.00 | 0.66 | 0.46 | 0 | Myofibroblasts |
| <i>ECHDC2</i>     | 0.4  | 0.00 | 0.00 | 0.33 | 0.14 | 0 | Myofibroblasts |
| <i>CASC15</i>     | 0.4  | 0.00 | 0.00 | 0.25 | 0.09 | 0 | Myofibroblasts |
| <i>POLE4</i>      | 0.4  | 0.00 | 0.00 | 0.38 | 0.22 | 0 | Myofibroblasts |
| <i>GADD45B</i>    | 0.4  | 0.00 | 0.00 | 0.53 | 0.40 | 0 | Myofibroblasts |
| <i>MAP1B</i>      | 0.4  | 0.00 | 0.00 | 0.38 | 0.22 | 0 | Myofibroblasts |
| <i>AC013461.1</i> | 0.4  | 0.00 | 0.00 | 0.57 | 0.34 | 0 | Myofibroblasts |
| <i>RPL5P34</i>    | 0.4  | 0.00 | 0.00 | 0.88 | 0.73 | 0 | Myofibroblasts |
| <i>RPL5P4</i>     | 0.39 | 0.00 | 0.00 | 0.63 | 0.43 | 0 | Myofibroblasts |
| <i>ST5</i>        | 0.39 | 0.00 | 0.00 | 0.41 | 0.21 | 0 | Myofibroblasts |
| <i>SPON1</i>      | 0.39 | 0.00 | 0.00 | 0.35 | 0.14 | 0 | Myofibroblasts |
| <i>LTBP3</i>      | 0.39 | 0.00 | 0.00 | 0.34 | 0.17 | 0 | Myofibroblasts |
| <i>CCDC107</i>    | 0.39 | 0.00 | 0.00 | 0.42 | 0.24 | 0 | Myofibroblasts |
| <i>RPL37A</i>     | 0.39 | 0.00 | 0.00 | 1.00 | 0.99 | 0 | Myofibroblasts |
| <i>MSRB3</i>      | 0.38 | 0.00 | 0.00 | 0.42 | 0.22 | 0 | Myofibroblasts |
| <i>STX8</i>       | 0.38 | 0.00 | 0.00 | 0.31 | 0.16 | 0 | Myofibroblasts |
| <i>RPL5</i>       | 0.37 | 0.00 | 0.00 | 0.99 | 0.96 | 0 | Myofibroblasts |
| <i>RPS5</i>       | 0.37 | 0.00 | 0.00 | 0.99 | 0.95 | 0 | Myofibroblasts |
| <i>SBDS</i>       | 0.37 | 0.00 | 0.00 | 0.63 | 0.46 | 0 | Myofibroblasts |
| <i>ACTB</i>       | 0.37 | 0.00 | 0.00 | 1.00 | 0.99 | 0 | Myofibroblasts |
| <i>LDHA</i>       | 0.37 | 0.00 | 0.00 | 0.71 | 0.56 | 0 | Myofibroblasts |
| <i>NPM1</i>       | 0.36 | 0.00 | 0.00 | 0.95 | 0.87 | 0 | Myofibroblasts |
| <i>ARL4A</i>      | 0.36 | 0.00 | 0.00 | 0.27 | 0.10 | 0 | Myofibroblasts |
| <i>EEF1B2P6</i>   | 0.36 | 0.00 | 0.00 | 0.57 | 0.40 | 0 | Myofibroblasts |
| <i>GNG12</i>      | 0.35 | 0.00 | 0.00 | 0.27 | 0.14 | 0 | Myofibroblasts |
| <i>PCSK7</i>      | 0.35 | 0.00 | 0.00 | 0.46 | 0.26 | 0 | Myofibroblasts |
| <i>CFL2</i>       | 0.35 | 0.00 | 0.00 | 0.34 | 0.18 | 0 | Myofibroblasts |
| <i>FAUP1</i>      | 0.34 | 0.00 | 0.00 | 0.77 | 0.63 | 0 | Myofibroblasts |
| <i>RPS21</i>      | 0.34 | 0.00 | 0.00 | 0.98 | 0.92 | 0 | Myofibroblasts |
| <i>RBMS3</i>      | 0.34 | 0.00 | 0.00 | 0.33 | 0.18 | 0 | Myofibroblasts |
| <i>RPL9</i>       | 0.34 | 0.00 | 0.00 | 1.00 | 0.98 | 0 | Myofibroblasts |
| <i>RRAD</i>       | 0.34 | 0.00 | 0.00 | 0.30 | 0.17 | 0 | Myofibroblasts |
| <i>RCN2</i>       | 0.34 | 0.00 | 0.00 | 0.55 | 0.39 | 0 | Myofibroblasts |
| <i>TLN1</i>       | 0.34 | 0.00 | 0.00 | 0.45 | 0.29 | 0 | Myofibroblasts |
| <i>SOX4</i>       | 0.34 | 0.00 | 0.00 | 0.87 | 0.74 | 0 | Myofibroblasts |
| <i>ZSCAN18</i>    | 0.33 | 0.00 | 0.00 | 0.43 | 0.26 | 0 | Myofibroblasts |

|                      |      |      |      |      |      |   |                |
|----------------------|------|------|------|------|------|---|----------------|
| <i>RP11-270C12.3</i> | 0.33 | 0.00 | 0.00 | 0.43 | 0.28 | 0 | Myofibroblasts |
| <i>RP11-475C16.1</i> | 0.33 | 0.00 | 0.00 | 0.91 | 0.81 | 0 | Myofibroblasts |
| <i>CRIP2</i>         | 0.32 | 0.00 | 0.00 | 0.83 | 0.63 | 0 | Myofibroblasts |
| <i>RP3-486I3.4</i>   | 0.32 | 0.00 | 0.00 | 0.79 | 0.64 | 0 | Myofibroblasts |
| <i>NDUFV2</i>        | 0.32 | 0.00 | 0.00 | 0.43 | 0.31 | 0 | Myofibroblasts |
| <i>PTK7</i>          | 0.32 | 0.00 | 0.00 | 0.35 | 0.19 | 0 | Myofibroblasts |
| <i>RAB34</i>         | 0.32 | 0.00 | 0.00 | 0.53 | 0.37 | 0 | Myofibroblasts |
| <i>RPL8</i>          | 0.31 | 0.00 | 0.00 | 1.00 | 0.98 | 0 | Myofibroblasts |
| <i>DBN1</i>          | 0.31 | 0.00 | 0.00 | 0.35 | 0.20 | 0 | Myofibroblasts |
| <i>EEF1A1P5</i>      | 0.31 | 0.00 | 0.00 | 0.78 | 0.64 | 0 | Myofibroblasts |
| <i>ADAMTS1</i>       | 0.31 | 0.00 | 0.00 | 0.31 | 0.18 | 0 | Myofibroblasts |
| <i>SYNE1</i>         | 0.31 | 0.00 | 0.00 | 0.29 | 0.15 | 0 | Myofibroblasts |
| <i>RBPMS</i>         | 0.31 | 0.00 | 0.00 | 0.33 | 0.19 | 0 | Myofibroblasts |
| <i>RP11-393N4.2</i>  | 0.3  | 0.00 | 0.00 | 0.76 | 0.64 | 0 | Myofibroblasts |
| <i>MXRA7</i>         | 0.3  | 0.00 | 0.00 | 0.27 | 0.13 | 0 | Myofibroblasts |
| <i>RPL7</i>          | 0.3  | 0.00 | 0.00 | 1.00 | 0.98 | 0 | Myofibroblasts |
| <i>RPL27A</i>        | 0.3  | 0.00 | 0.00 | 1.00 | 0.99 | 0 | Myofibroblasts |
| <i>FOXN3</i>         | 0.3  | 0.00 | 0.00 | 0.34 | 0.21 | 0 | Myofibroblasts |
| <i>RPL18</i>         | 0.3  | 0.00 | 0.00 | 1.00 | 0.98 | 0 | Myofibroblasts |
| <i>TCEAL3</i>        | 0.3  | 0.00 | 0.00 | 0.31 | 0.18 | 0 | Myofibroblasts |
| <i>RBP1</i>          | 0.3  | 0.00 | 0.00 | 0.52 | 0.34 | 0 | Myofibroblasts |
| <i>DAPK3</i>         | 0.3  | 0.00 | 0.00 | 0.31 | 0.17 | 0 | Myofibroblasts |
| <i>JUND</i>          | 0.29 | 0.00 | 0.00 | 0.41 | 0.29 | 0 | Myofibroblasts |
| <i>KANK2</i>         | 0.29 | 0.00 | 0.00 | 0.50 | 0.32 | 0 | Myofibroblasts |
| <i>RPL10A</i>        | 0.29 | 0.00 | 0.00 | 0.99 | 0.96 | 0 | Myofibroblasts |
| <i>RPS24</i>         | 0.29 | 0.00 | 0.00 | 1.00 | 0.98 | 0 | Myofibroblasts |
| <i>TERF1</i>         | 0.29 | 0.00 | 0.00 | 0.34 | 0.21 | 0 | Myofibroblasts |
| <i>PRDM6</i>         | 0.29 | 0.00 | 0.00 | 0.27 | 0.13 | 0 | Myofibroblasts |
| <i>EEF1B2P3</i>      | 0.29 | 0.00 | 0.00 | 0.35 | 0.23 | 0 | Myofibroblasts |
| <i>MYH9</i>          | 0.29 | 0.00 | 0.00 | 0.57 | 0.43 | 0 | Myofibroblasts |
| <i>RPL21</i>         | 0.28 | 0.00 | 0.00 | 1.00 | 0.99 | 0 | Myofibroblasts |
| <i>RPL7P1</i>        | 0.28 | 0.00 | 0.00 | 0.80 | 0.66 | 0 | Myofibroblasts |
| <i>DPYSL3</i>        | 0.28 | 0.00 | 0.00 | 0.28 | 0.14 | 0 | Myofibroblasts |
| <i>HSP90AB3P</i>     | 0.28 | 0.00 | 0.00 | 0.61 | 0.49 | 0 | Myofibroblasts |
| <i>RP11-425L10.1</i> | 0.28 | 0.00 | 0.00 | 0.92 | 0.83 | 0 | Myofibroblasts |
| <i>RPL3P4</i>        | 0.28 | 0.00 | 0.00 | 0.98 | 0.94 | 0 | Myofibroblasts |
| <i>IMPDH2</i>        | 0.28 | 0.00 | 0.00 | 0.54 | 0.38 | 0 | Myofibroblasts |
| <i>RPL10AP6</i>      | 0.28 | 0.00 | 0.00 | 0.85 | 0.76 | 0 | Myofibroblasts |
| <i>DRAP1</i>         | 0.28 | 0.00 | 0.00 | 0.63 | 0.48 | 0 | Myofibroblasts |
| <i>AC090498.1</i>    | 0.27 | 0.00 | 0.00 | 0.98 | 0.93 | 0 | Myofibroblasts |
| <i>RPS10</i>         | 0.27 | 0.00 | 0.00 | 0.95 | 0.89 | 0 | Myofibroblasts |

|                     |      |      |      |      |      |   |                    |
|---------------------|------|------|------|------|------|---|--------------------|
| <i>KLHL23</i>       | 0.27 | 0.00 | 0.00 | 0.32 | 0.18 | 0 | Myofibroblasts     |
| <i>AEBP1</i>        | 0.27 | 0.00 | 0.00 | 0.32 | 0.19 | 0 | Myofibroblasts     |
| <i>PLEKHO1</i>      | 0.27 | 0.00 | 0.00 | 0.27 | 0.15 | 0 | Myofibroblasts     |
| <i>PLS3</i>         | 0.27 | 0.00 | 0.00 | 0.54 | 0.41 | 0 | Myofibroblasts     |
| <i>SNRPN</i>        | 0.27 | 0.00 | 0.00 | 0.61 | 0.46 | 0 | Myofibroblasts     |
| <i>VDAC2</i>        | 0.27 | 0.00 | 0.00 | 0.65 | 0.52 | 0 | Myofibroblasts     |
| <i>SNHG14</i>       | 0.27 | 0.00 | 0.00 | 0.26 | 0.13 | 0 | Myofibroblasts     |
| <i>RP3-417G15.1</i> | 0.27 | 0.00 | 0.00 | 0.87 | 0.75 | 0 | Myofibroblasts     |
| <i>GABARAPL2</i>    | 0.27 | 0.00 | 0.00 | 0.75 | 0.65 | 0 | Myofibroblasts     |
| <i>MTCH1</i>        | 0.27 | 0.00 | 0.00 | 0.62 | 0.50 | 0 | Myofibroblasts     |
| <i>RHEB</i>         | 0.26 | 0.00 | 0.00 | 0.56 | 0.47 | 0 | Myofibroblasts     |
| <i>SLIRP</i>        | 0.26 | 0.00 | 0.00 | 0.58 | 0.48 | 0 | Myofibroblasts     |
| <i>TNS1</i>         | 0.26 | 0.00 | 0.00 | 0.35 | 0.22 | 0 | Myofibroblasts     |
| <i>RPL5P1</i>       | 0.26 | 0.00 | 0.00 | 0.47 | 0.34 | 0 | Myofibroblasts     |
| <i>RPS4XP6</i>      | 0.26 | 0.00 | 0.00 | 0.88 | 0.76 | 0 | Myofibroblasts     |
| <i>MT2A</i>         | 0.26 | 0.00 | 0.00 | 0.76 | 0.61 | 0 | Myofibroblasts     |
| <i>MLXIP</i>        | 0.26 | 0.00 | 0.00 | 0.30 | 0.16 | 0 | Myofibroblasts     |
| <i>RPL24</i>        | 0.26 | 0.00 | 0.00 | 0.98 | 0.96 | 0 | Myofibroblasts     |
| <i>ATP1B1</i>       | 0.26 | 0.00 | 0.00 | 0.36 | 0.20 | 0 | Myofibroblasts     |
| <i>CHCHD2</i>       | 0.26 | 0.00 | 0.00 | 0.91 | 0.82 | 0 | Myofibroblasts     |
| <i>RPS2P5</i>       | 0.25 | 0.00 | 0.00 | 0.86 | 0.72 | 0 | Myofibroblasts     |
| <i>AHI1</i>         | 0.25 | 0.00 | 0.00 | 0.26 | 0.15 | 0 | Myofibroblasts     |
| <i>COX7B</i>        | 0.25 | 0.00 | 0.00 | 0.72 | 0.61 | 0 | Myofibroblasts     |
| <i>TUBB4B</i>       | 0.25 | 0.00 | 0.00 | 0.52 | 0.39 | 0 | Myofibroblasts     |
| <i>RPL41</i>        | 0.25 | 0.00 | 0.00 | 1.00 | 1.00 | 0 | Myofibroblasts     |
| <i>RPS12</i>        | 0.25 | 0.00 | 0.00 | 1.00 | 0.99 | 0 | Myofibroblasts     |
| <i>RPL3</i>         | 0.25 | 0.00 | 0.00 | 1.00 | 0.99 | 0 | Myofibroblasts     |
| <i>RPL24P8</i>      | 0.25 | 0.00 | 0.00 | 0.75 | 0.65 | 0 | Myofibroblasts     |
| <i>EIF5</i>         | 0.25 | 0.00 | 0.00 | 0.59 | 0.49 | 0 | Myofibroblasts     |
| <i>EEF1A1</i>       | 0.25 | 0.00 | 0.00 | 1.00 | 1.00 | 0 | Myofibroblasts     |
| <i>NDUFB9</i>       | 0.25 | 0.00 | 0.00 | 0.64 | 0.51 | 0 | Myofibroblasts     |
| <i>AXL</i>          | 0.25 | 0.00 | 0.00 | 0.34 | 0.21 | 0 | Myofibroblasts     |
| <i>RPS4X</i>        | 0.25 | 0.00 | 0.00 | 1.00 | 0.99 | 0 | Myofibroblasts     |
| <i>CFD</i>          | 2.41 | 0.00 | 0.00 | 0.97 | 0.17 | 1 | Matrix Fibroblasts |
| <i>ADH1B</i>        | 2.38 | 0.00 | 0.00 | 0.94 | 0.15 | 1 | Matrix Fibroblasts |
| <i>LUM</i>          | 2.37 | 0.00 | 0.00 | 0.97 | 0.28 | 1 | Matrix Fibroblasts |
| <i>GPC3</i>         | 2.11 | 0.00 | 0.00 | 0.93 | 0.14 | 1 | Matrix Fibroblasts |
| <i>TCF21</i>        | 2.1  | 0.00 | 0.00 | 0.93 | 0.20 | 1 | Matrix Fibroblasts |
| <i>SEPP1</i>        | 1.98 | 0.00 | 0.00 | 0.96 | 0.50 | 1 | Matrix Fibroblasts |
| <i>FN1</i>          | 1.91 | 0.00 | 0.00 | 0.95 | 0.37 | 1 | Matrix Fibroblasts |
| <i>RARRES2</i>      | 1.75 | 0.00 | 0.00 | 0.97 | 0.44 | 1 | Matrix Fibroblasts |
| <i>MFAP4</i>        | 1.72 | 0.00 | 0.00 | 0.98 | 0.42 | 1 | Matrix Fibroblasts |

|                |      |      |      |      |      |   |                    |
|----------------|------|------|------|------|------|---|--------------------|
| <i>WNT2</i>    | 1.7  | 0.00 | 0.00 | 0.70 | 0.02 | 1 | Matrix Fibroblasts |
| <i>LIMCH1</i>  | 1.66 | 0.00 | 0.00 | 0.77 | 0.12 | 1 | Matrix Fibroblasts |
| <i>PLEKHH2</i> | 1.63 | 0.00 | 0.00 | 0.74 | 0.13 | 1 | Matrix Fibroblasts |
| <i>G0S2</i>    | 1.6  | 0.00 | 0.00 | 0.63 | 0.11 | 1 | Matrix Fibroblasts |
| <i>COL6A3</i>  | 1.56 | 0.00 | 0.00 | 0.91 | 0.30 | 1 | Matrix Fibroblasts |
| <i>FBLN1</i>   | 1.56 | 0.00 | 0.00 | 0.94 | 0.20 | 1 | Matrix Fibroblasts |
| <i>RARRES1</i> | 1.55 | 0.00 | 0.00 | 0.52 | 0.12 | 1 | Matrix Fibroblasts |
| <i>APOE</i>    | 1.55 | 0.00 | 0.00 | 0.83 | 0.23 | 1 | Matrix Fibroblasts |
| <i>INMT</i>    | 1.54 | 0.00 | 0.00 | 0.69 | 0.14 | 1 | Matrix Fibroblasts |
| <i>C7</i>      | 1.51 | 0.00 | 0.00 | 0.77 | 0.07 | 1 | Matrix Fibroblasts |
| <i>VEGFD</i>   | 1.45 | 0.00 | 0.00 | 0.56 | 0.04 | 1 | Matrix Fibroblasts |
| <i>A2M</i>     | 1.41 | 0.00 | 0.00 | 0.74 | 0.60 | 1 | Matrix Fibroblasts |
| <i>LMO4</i>    | 1.37 | 0.00 | 0.00 | 0.80 | 0.31 | 1 | Matrix Fibroblasts |
| <i>OLFML3</i>  | 1.34 | 0.00 | 0.00 | 0.66 | 0.13 | 1 | Matrix Fibroblasts |
| <i>LBH</i>     | 1.33 | 0.00 | 0.00 | 0.84 | 0.33 | 1 | Matrix Fibroblasts |
| <i>DST</i>     | 1.3  | 0.00 | 0.00 | 0.86 | 0.36 | 1 | Matrix Fibroblasts |
| <i>CA3</i>     | 1.3  | 0.00 | 0.00 | 0.37 | 0.02 | 1 | Matrix Fibroblasts |
| <i>PIEZO2</i>  | 1.26 | 0.00 | 0.00 | 0.55 | 0.04 | 1 | Matrix Fibroblasts |
| <i>MACF1</i>   | 1.26 | 0.00 | 0.00 | 0.79 | 0.31 | 1 | Matrix Fibroblasts |
| <i>NBL1</i>    | 1.25 | 0.00 | 0.00 | 0.85 | 0.29 | 1 | Matrix Fibroblasts |
| <i>DCN</i>     | 1.24 | 0.00 | 0.00 | 0.97 | 0.47 | 1 | Matrix Fibroblasts |
| <i>MEOX2</i>   | 1.21 | 0.00 | 0.00 | 0.56 | 0.07 | 1 | Matrix Fibroblasts |
| <i>ABCA8</i>   | 1.18 | 0.00 | 0.00 | 0.53 | 0.06 | 1 | Matrix Fibroblasts |
| <i>CDH11</i>   | 1.18 | 0.00 | 0.00 | 0.66 | 0.13 | 1 | Matrix Fibroblasts |
| <i>CAMK2N1</i> | 1.13 | 0.00 | 0.00 | 0.65 | 0.15 | 1 | Matrix Fibroblasts |
| <i>C1R</i>     | 1.11 | 0.00 | 0.00 | 0.59 | 0.19 | 1 | Matrix Fibroblasts |
| <i>RSPO2</i>   | 1.11 | 0.00 | 0.00 | 0.45 | 0.01 | 1 | Matrix Fibroblasts |
| <i>MMP2</i>    | 1.09 | 0.00 | 0.00 | 0.82 | 0.27 | 1 | Matrix Fibroblasts |
| <i>PMP22</i>   | 1.08 | 0.00 | 0.00 | 0.80 | 0.43 | 1 | Matrix Fibroblasts |
| <i>LITAF</i>   | 1.05 | 0.00 | 0.00 | 0.71 | 0.43 | 1 | Matrix Fibroblasts |
| <i>GYG1</i>    | 1.05 | 0.00 | 0.00 | 0.57 | 0.19 | 1 | Matrix Fibroblasts |
| <i>LRRC17</i>  | 1.04 | 0.00 | 0.00 | 0.49 | 0.07 | 1 | Matrix Fibroblasts |
| <i>FGFR4</i>   | 1.03 | 0.00 | 0.00 | 0.45 | 0.02 | 1 | Matrix Fibroblasts |
| <i>NR2F1</i>   | 1.03 | 0.00 | 0.00 | 0.67 | 0.21 | 1 | Matrix Fibroblasts |
| <i>ABCA6</i>   | 1.03 | 0.00 | 0.00 | 0.41 | 0.03 | 1 | Matrix Fibroblasts |
| <i>EMILIN1</i> | 1.02 | 0.00 | 0.00 | 0.63 | 0.18 | 1 | Matrix Fibroblasts |
| <i>METTL7A</i> | 1.01 | 0.00 | 0.00 | 0.46 | 0.06 | 1 | Matrix Fibroblasts |
| <i>CEBPD</i>   | 1    | 0.00 | 0.00 | 0.58 | 0.25 | 1 | Matrix Fibroblasts |
| <i>CCBE1</i>   | 1    | 0.00 | 0.00 | 0.48 | 0.06 | 1 | Matrix Fibroblasts |
| <i>SLC40A1</i> | 0.98 | 0.00 | 0.00 | 0.65 | 0.19 | 1 | Matrix Fibroblasts |
| <i>COL6A1</i>  | 0.96 | 0.00 | 0.00 | 0.87 | 0.48 | 1 | Matrix Fibroblasts |
| <i>ZYX</i>     | 0.96 | 0.00 | 0.00 | 0.66 | 0.28 | 1 | Matrix Fibroblasts |
| <i>SMPDL3A</i> | 0.96 | 0.00 | 0.00 | 0.42 | 0.05 | 1 | Matrix Fibroblasts |

|                 |      |      |      |      |      |   |                    |
|-----------------|------|------|------|------|------|---|--------------------|
| <i>COLEC12</i>  | 0.95 | 0.00 | 0.00 | 0.48 | 0.08 | 1 | Matrix Fibroblasts |
| <i>TNC</i>      | 0.94 | 0.00 | 0.00 | 0.44 | 0.13 | 1 | Matrix Fibroblasts |
| <i>FMO2</i>     | 0.92 | 0.00 | 0.00 | 0.37 | 0.03 | 1 | Matrix Fibroblasts |
| <i>OGN</i>      | 0.91 | 0.00 | 0.00 | 0.49 | 0.09 | 1 | Matrix Fibroblasts |
| <i>FBLN5</i>    | 0.91 | 0.00 | 0.00 | 0.53 | 0.11 | 1 | Matrix Fibroblasts |
| <i>C1S</i>      | 0.91 | 0.00 | 0.00 | 0.56 | 0.16 | 1 | Matrix Fibroblasts |
| <i>MDK</i>      | 0.9  | 0.00 | 0.00 | 0.84 | 0.49 | 1 | Matrix Fibroblasts |
| <i>SLIT2</i>    | 0.89 | 0.00 | 0.00 | 0.46 | 0.12 | 1 | Matrix Fibroblasts |
| <i>ANGPT1</i>   | 0.88 | 0.00 | 0.00 | 0.46 | 0.10 | 1 | Matrix Fibroblasts |
| <i>PPP1R3C</i>  | 0.88 | 0.00 | 0.00 | 0.38 | 0.10 | 1 | Matrix Fibroblasts |
| <i>RGS2</i>     | 0.84 | 0.00 | 0.00 | 0.62 | 0.26 | 1 | Matrix Fibroblasts |
| <i>ZFP36L2</i>  | 0.84 | 0.00 | 0.00 | 0.69 | 0.47 | 1 | Matrix Fibroblasts |
| <i>VCAN</i>     | 0.84 | 0.00 | 0.00 | 0.76 | 0.28 | 1 | Matrix Fibroblasts |
| <i>MYH10</i>    | 0.84 | 0.00 | 0.00 | 0.53 | 0.23 | 1 | Matrix Fibroblasts |
| <i>PPP1R14A</i> | 0.84 | 0.00 | 0.00 | 0.73 | 0.38 | 1 | Matrix Fibroblasts |
| <i>GDF10</i>    | 0.83 | 0.00 | 0.00 | 0.34 | 0.04 | 1 | Matrix Fibroblasts |
| <i>FGF7</i>     | 0.83 | 0.00 | 0.00 | 0.38 | 0.06 | 1 | Matrix Fibroblasts |
| <i>COL1A2</i>   | 0.82 | 0.00 | 0.00 | 0.98 | 0.59 | 1 | Matrix Fibroblasts |
| <i>PLPP1</i>    | 0.82 | 0.00 | 0.00 | 0.52 | 0.18 | 1 | Matrix Fibroblasts |
| <i>LAMA4</i>    | 0.79 | 0.00 | 0.00 | 0.54 | 0.21 | 1 | Matrix Fibroblasts |
| <i>LTBP4</i>    | 0.79 | 0.00 | 0.00 | 0.61 | 0.25 | 1 | Matrix Fibroblasts |
| <i>POSTN</i>    | 0.79 | 0.00 | 0.00 | 0.49 | 0.17 | 1 | Matrix Fibroblasts |
| <i>SNHG6</i>    | 0.77 | 0.00 | 0.00 | 0.76 | 0.47 | 1 | Matrix Fibroblasts |
| <i>MEST</i>     | 0.77 | 0.00 | 0.00 | 0.74 | 0.32 | 1 | Matrix Fibroblasts |
| <i>SCN7A</i>    | 0.77 | 0.00 | 0.00 | 0.38 | 0.07 | 1 | Matrix Fibroblasts |
| <i>CXCL12</i>   | 0.75 | 0.00 | 0.00 | 0.58 | 0.19 | 1 | Matrix Fibroblasts |
| <i>LOXL1</i>    | 0.75 | 0.00 | 0.00 | 0.39 | 0.09 | 1 | Matrix Fibroblasts |
| <i>COL13A1</i>  | 0.74 | 0.00 | 0.00 | 0.33 | 0.06 | 1 | Matrix Fibroblasts |
| <i>MAF</i>      | 0.74 | 0.00 | 0.00 | 0.38 | 0.08 | 1 | Matrix Fibroblasts |
| <i>PKN2</i>     | 0.74 | 0.00 | 0.00 | 0.42 | 0.15 | 1 | Matrix Fibroblasts |
| <i>DKK3</i>     | 0.73 | 0.00 | 0.00 | 0.59 | 0.24 | 1 | Matrix Fibroblasts |
| <i>PLXDC2</i>   | 0.73 | 0.00 | 0.00 | 0.43 | 0.11 | 1 | Matrix Fibroblasts |
| <i>SERPING1</i> | 0.73 | 0.00 | 0.00 | 0.69 | 0.35 | 1 | Matrix Fibroblasts |
| <i>FAM213A</i>  | 0.73 | 0.00 | 0.00 | 0.45 | 0.17 | 1 | Matrix Fibroblasts |
| <i>CHST2</i>    | 0.73 | 0.00 | 0.00 | 0.33 | 0.07 | 1 | Matrix Fibroblasts |
| <i>GSTM5</i>    | 0.72 | 0.00 | 0.00 | 0.40 | 0.09 | 1 | Matrix Fibroblasts |
| <i>COL5A2</i>   | 0.72 | 0.00 | 0.00 | 0.48 | 0.18 | 1 | Matrix Fibroblasts |
| <i>SLC38A5</i>  | 0.72 | 0.00 | 0.00 | 0.32 | 0.03 | 1 | Matrix Fibroblasts |
| <i>RGS3</i>     | 0.71 | 0.00 | 0.00 | 0.39 | 0.26 | 1 | Matrix Fibroblasts |
| <i>MRC2</i>     | 0.71 | 0.00 | 0.00 | 0.33 | 0.08 | 1 | Matrix Fibroblasts |
| <i>CSRP1</i>    | 0.7  | 0.00 | 0.00 | 0.86 | 0.56 | 1 | Matrix Fibroblasts |
| <i>MOXD1</i>    | 0.7  | 0.00 | 0.00 | 0.31 | 0.03 | 1 | Matrix Fibroblasts |
| <i>ITGA8</i>    | 0.69 | 0.00 | 0.00 | 0.39 | 0.09 | 1 | Matrix Fibroblasts |

|                     |      |      |      |      |      |   |                    |
|---------------------|------|------|------|------|------|---|--------------------|
| <i>COL6A2</i>       | 0.69 | 0.00 | 0.00 | 0.88 | 0.58 | 1 | Matrix Fibroblasts |
| <i>SPINT2</i>       | 0.69 | 0.00 | 0.00 | 0.41 | 0.10 | 1 | Matrix Fibroblasts |
| <i>LDOC1</i>        | 0.68 | 0.00 | 0.00 | 0.34 | 0.09 | 1 | Matrix Fibroblasts |
| <i>KCNQ1OT1</i>     | 0.68 | 0.00 | 0.00 | 0.53 | 0.27 | 1 | Matrix Fibroblasts |
| <i>CD302</i>        | 0.68 | 0.00 | 0.00 | 0.42 | 0.14 | 1 | Matrix Fibroblasts |
| <i>LRP1</i>         | 0.68 | 0.00 | 0.00 | 0.43 | 0.15 | 1 | Matrix Fibroblasts |
| <i>NPNT</i>         | 0.68 | 0.00 | 0.00 | 0.33 | 0.07 | 1 | Matrix Fibroblasts |
| <i>PCOLCE</i>       | 0.68 | 0.00 | 0.00 | 0.66 | 0.26 | 1 | Matrix Fibroblasts |
| <i>PDLIM2</i>       | 0.68 | 0.00 | 0.00 | 0.46 | 0.18 | 1 | Matrix Fibroblasts |
| <i>SNHG8</i>        | 0.67 | 0.00 | 0.00 | 0.77 | 0.53 | 1 | Matrix Fibroblasts |
| <i>AOC3</i>         | 0.67 | 0.00 | 0.00 | 0.63 | 0.29 | 1 | Matrix Fibroblasts |
| <i>EPHX1</i>        | 0.67 | 0.00 | 0.00 | 0.50 | 0.23 | 1 | Matrix Fibroblasts |
| <i>LSAMP</i>        | 0.67 | 0.00 | 0.00 | 0.29 | 0.03 | 1 | Matrix Fibroblasts |
| <i>FAT3</i>         | 0.67 | 0.00 | 0.00 | 0.27 | 0.03 | 1 | Matrix Fibroblasts |
| <i>TGM2</i>         | 0.66 | 0.00 | 0.00 | 0.56 | 0.37 | 1 | Matrix Fibroblasts |
| <i>ALDH1A1</i>      | 0.66 | 0.00 | 0.00 | 0.35 | 0.09 | 1 | Matrix Fibroblasts |
| <i>RBP1</i>         | 0.66 | 0.00 | 0.00 | 0.60 | 0.32 | 1 | Matrix Fibroblasts |
| <i>SLC1A5</i>       | 0.66 | 0.00 | 0.00 | 0.33 | 0.06 | 1 | Matrix Fibroblasts |
| <i>GNAI1</i>        | 0.65 | 0.00 | 0.00 | 0.42 | 0.15 | 1 | Matrix Fibroblasts |
| <i>RN7SK</i>        | 0.65 | 0.00 | 0.00 | 0.43 | 0.27 | 1 | Matrix Fibroblasts |
| <i>FHL1</i>         | 0.65 | 0.00 | 0.00 | 0.85 | 0.53 | 1 | Matrix Fibroblasts |
| <i>PTPRD</i>        | 0.64 | 0.00 | 0.00 | 0.29 | 0.06 | 1 | Matrix Fibroblasts |
| <i>MMP23B</i>       | 0.64 | 0.00 | 0.00 | 0.39 | 0.10 | 1 | Matrix Fibroblasts |
| <i>TMEM98</i>       | 0.64 | 0.00 | 0.00 | 0.58 | 0.29 | 1 | Matrix Fibroblasts |
| <i>CNN2</i>         | 0.63 | 0.00 | 0.00 | 0.46 | 0.19 | 1 | Matrix Fibroblasts |
| <i>EIF3E</i>        | 0.63 | 0.00 | 0.00 | 0.86 | 0.76 | 1 | Matrix Fibroblasts |
| <i>ASPA</i>         | 0.63 | 0.00 | 0.00 | 0.27 | 0.02 | 1 | Matrix Fibroblasts |
| <i>PRKCB</i>        | 0.62 | 0.00 | 0.00 | 0.28 | 0.05 | 1 | Matrix Fibroblasts |
| <i>COL3A1</i>       | 0.62 | 0.00 | 0.00 | 0.94 | 0.53 | 1 | Matrix Fibroblasts |
| <i>ENPP2</i>        | 0.62 | 0.00 | 0.00 | 0.37 | 0.10 | 1 | Matrix Fibroblasts |
| <i>EPB41L4A-AS1</i> | 0.61 | 0.00 | 0.00 | 0.50 | 0.24 | 1 | Matrix Fibroblasts |
| <i>SNCA</i>         | 0.61 | 0.00 | 0.00 | 0.29 | 0.06 | 1 | Matrix Fibroblasts |
| <i>PEG10</i>        | 0.6  | 0.00 | 0.00 | 0.25 | 0.06 | 1 | Matrix Fibroblasts |
| <i>MMP14</i>        | 0.59 | 0.00 | 0.00 | 0.44 | 0.20 | 1 | Matrix Fibroblasts |
| <i>QSOX1</i>        | 0.58 | 0.00 | 0.00 | 0.42 | 0.19 | 1 | Matrix Fibroblasts |
| <i>GYPC</i>         | 0.58 | 0.00 | 0.00 | 0.55 | 0.29 | 1 | Matrix Fibroblasts |
| <i>LAMC1</i>        | 0.58 | 0.00 | 0.00 | 0.42 | 0.19 | 1 | Matrix Fibroblasts |
| <i>FHOD1</i>        | 0.58 | 0.00 | 0.00 | 0.31 | 0.07 | 1 | Matrix Fibroblasts |
| <i>GCSH</i>         | 0.57 | 0.00 | 0.00 | 0.43 | 0.20 | 1 | Matrix Fibroblasts |
| <i>MDFI</i>         | 0.57 | 0.00 | 0.00 | 0.40 | 0.16 | 1 | Matrix Fibroblasts |
| <i>BMP4</i>         | 0.57 | 0.00 | 0.00 | 0.31 | 0.07 | 1 | Matrix Fibroblasts |
| <i>CDO1</i>         | 0.57 | 0.00 | 0.00 | 0.27 | 0.05 | 1 | Matrix Fibroblasts |

|                      |      |      |      |      |      |   |                    |
|----------------------|------|------|------|------|------|---|--------------------|
| <i>CITED2</i>        | 0.57 | 0.00 | 0.00 | 0.44 | 0.21 | 1 | Matrix Fibroblasts |
| <i>SLC44A1</i>       | 0.57 | 0.00 | 0.00 | 0.38 | 0.16 | 1 | Matrix Fibroblasts |
| <i>COL1A1</i>        | 0.56 | 0.00 | 0.00 | 0.96 | 0.56 | 1 | Matrix Fibroblasts |
| <i>BNIP3L</i>        | 0.56 | 0.00 | 0.00 | 0.59 | 0.36 | 1 | Matrix Fibroblasts |
| <i>RP11-452N17.1</i> | 0.56 | 0.00 | 0.00 | 0.55 | 0.36 | 1 | Matrix Fibroblasts |
| <i>GJA5</i>          | 0.55 | 0.00 | 0.00 | 0.25 | 0.04 | 1 | Matrix Fibroblasts |
| <i>SNAI2</i>         | 0.55 | 0.00 | 0.00 | 0.31 | 0.10 | 1 | Matrix Fibroblasts |
| <i>COL5A1</i>        | 0.55 | 0.00 | 0.00 | 0.42 | 0.20 | 1 | Matrix Fibroblasts |
| <i>COL14A1</i>       | 0.54 | 0.00 | 0.00 | 0.30 | 0.09 | 1 | Matrix Fibroblasts |
| <i>FXYP1</i>         | 0.54 | 0.00 | 0.00 | 0.48 | 0.24 | 1 | Matrix Fibroblasts |
| <i>OLFML2A</i>       | 0.54 | 0.00 | 0.00 | 0.28 | 0.09 | 1 | Matrix Fibroblasts |
| <i>LGALS3BP</i>      | 0.53 | 0.00 | 0.00 | 0.41 | 0.17 | 1 | Matrix Fibroblasts |
| <i>ALDH9A1</i>       | 0.53 | 0.00 | 0.00 | 0.43 | 0.21 | 1 | Matrix Fibroblasts |
| <i>DYNC2LI1</i>      | 0.53 | 0.00 | 0.00 | 0.29 | 0.09 | 1 | Matrix Fibroblasts |
| <i>RUNX1T1</i>       | 0.53 | 0.00 | 0.00 | 0.37 | 0.15 | 1 | Matrix Fibroblasts |
| <i>FMOD</i>          | 0.53 | 0.00 | 0.00 | 0.27 | 0.07 | 1 | Matrix Fibroblasts |
| <i>PRDX6</i>         | 0.52 | 0.00 | 0.00 | 0.68 | 0.53 | 1 | Matrix Fibroblasts |
| <i>MAOB</i>          | 0.52 | 0.00 | 0.00 | 0.26 | 0.06 | 1 | Matrix Fibroblasts |
| <i>ENAH</i>          | 0.52 | 0.00 | 0.00 | 0.49 | 0.27 | 1 | Matrix Fibroblasts |
| <i>PLAGL1</i>        | 0.51 | 0.00 | 0.00 | 0.30 | 0.11 | 1 | Matrix Fibroblasts |
| <i>PLPP3</i>         | 0.51 | 0.00 | 0.00 | 0.50 | 0.26 | 1 | Matrix Fibroblasts |
| <i>QPRT</i>          | 0.51 | 0.00 | 0.00 | 0.29 | 0.09 | 1 | Matrix Fibroblasts |
| <i>HIF3A</i>         | 0.51 | 0.00 | 0.00 | 0.29 | 0.12 | 1 | Matrix Fibroblasts |
| <i>CELF2</i>         | 0.5  | 0.00 | 0.00 | 0.41 | 0.21 | 1 | Matrix Fibroblasts |
| <i>MYO10</i>         | 0.5  | 0.00 | 0.00 | 0.30 | 0.10 | 1 | Matrix Fibroblasts |
| <i>PTMS</i>          | 0.5  | 0.00 | 0.00 | 0.91 | 0.75 | 1 | Matrix Fibroblasts |
| <i>COL21A1</i>       | 0.5  | 0.00 | 0.00 | 0.32 | 0.12 | 1 | Matrix Fibroblasts |
| <i>SMS</i>           | 0.49 | 0.00 | 0.00 | 0.40 | 0.20 | 1 | Matrix Fibroblasts |
| <i>PEBP1</i>         | 0.48 | 0.00 | 0.00 | 0.81 | 0.65 | 1 | Matrix Fibroblasts |
| <i>MAST4</i>         | 0.48 | 0.00 | 0.00 | 0.32 | 0.14 | 1 | Matrix Fibroblasts |
| <i>TMEM261</i>       | 0.48 | 0.00 | 0.00 | 0.45 | 0.26 | 1 | Matrix Fibroblasts |
| <i>MXRA8</i>         | 0.48 | 0.00 | 0.00 | 0.51 | 0.27 | 1 | Matrix Fibroblasts |
| <i>NMRK1</i>         | 0.48 | 0.00 | 0.00 | 0.26 | 0.08 | 1 | Matrix Fibroblasts |
| <i>SOD2</i>          | 0.48 | 0.00 | 0.00 | 0.29 | 0.19 | 1 | Matrix Fibroblasts |
| <i>TOMM7</i>         | 0.47 | 0.00 | 0.00 | 0.93 | 0.84 | 1 | Matrix Fibroblasts |
| <i>LURAP1L</i>       | 0.47 | 0.00 | 0.00 | 0.39 | 0.16 | 1 | Matrix Fibroblasts |
| <i>FBLIM1</i>        | 0.46 | 0.00 | 0.00 | 0.33 | 0.16 | 1 | Matrix Fibroblasts |
| <i>HACD3</i>         | 0.46 | 0.00 | 0.00 | 0.38 | 0.20 | 1 | Matrix Fibroblasts |
| <i>FILIP1</i>        | 0.46 | 0.00 | 0.00 | 0.34 | 0.16 | 1 | Matrix Fibroblasts |
| <i>PTGER1</i>        | 0.46 | 0.00 | 0.00 | 0.26 | 0.07 | 1 | Matrix Fibroblasts |
| <i>GULP1</i>         | 0.46 | 0.00 | 0.00 | 0.28 | 0.11 | 1 | Matrix Fibroblasts |
| <i>CIRBP</i>         | 0.46 | 0.00 | 0.00 | 0.95 | 0.85 | 1 | Matrix Fibroblasts |

|                     |      |      |      |      |      |   |                    |
|---------------------|------|------|------|------|------|---|--------------------|
| <i>RND3</i>         | 0.46 | 0.00 | 0.00 | 0.34 | 0.17 | 1 | Matrix Fibroblasts |
| <i>FNIP1</i>        | 0.45 | 0.00 | 0.00 | 0.35 | 0.20 | 1 | Matrix Fibroblasts |
| <i>MSRB2</i>        | 0.45 | 0.00 | 0.00 | 0.38 | 0.20 | 1 | Matrix Fibroblasts |
| <i>PPIB</i>         | 0.44 | 0.00 | 0.00 | 0.82 | 0.70 | 1 | Matrix Fibroblasts |
| <i>EDNRA</i>        | 0.44 | 0.00 | 0.00 | 0.39 | 0.21 | 1 | Matrix Fibroblasts |
| <i>SAT1</i>         | 0.44 | 0.00 | 0.00 | 0.75 | 0.53 | 1 | Matrix Fibroblasts |
| <i>PLTP</i>         | 0.44 | 0.00 | 0.00 | 0.30 | 0.12 | 1 | Matrix Fibroblasts |
| <i>NREP</i>         | 0.43 | 0.00 | 0.00 | 0.51 | 0.36 | 1 | Matrix Fibroblasts |
| <i>FZD1</i>         | 0.43 | 0.00 | 0.00 | 0.26 | 0.09 | 1 | Matrix Fibroblasts |
| <i>LPL</i>          | 0.43 | 0.00 | 0.00 | 0.41 | 0.15 | 1 | Matrix Fibroblasts |
| <i>SOD3</i>         | 0.43 | 0.00 | 0.00 | 0.69 | 0.38 | 1 | Matrix Fibroblasts |
| <i>VSTM4</i>        | 0.43 | 0.00 | 0.00 | 0.26 | 0.10 | 1 | Matrix Fibroblasts |
| <i>CCDC8</i>        | 0.42 | 0.00 | 0.00 | 0.26 | 0.09 | 1 | Matrix Fibroblasts |
| <i>S1PR1</i>        | 0.42 | 0.00 | 0.00 | 0.28 | 0.12 | 1 | Matrix Fibroblasts |
| <i>TM2D2</i>        | 0.42 | 0.00 | 0.00 | 0.31 | 0.16 | 1 | Matrix Fibroblasts |
| <i>SNRPN</i>        | 0.41 | 0.00 | 0.00 | 0.60 | 0.46 | 1 | Matrix Fibroblasts |
| <i>RNF146</i>       | 0.41 | 0.00 | 0.00 | 0.33 | 0.18 | 1 | Matrix Fibroblasts |
| <i>NEXN</i>         | 0.41 | 0.00 | 0.00 | 0.39 | 0.20 | 1 | Matrix Fibroblasts |
| <i>CTSC</i>         | 0.4  | 0.00 | 0.00 | 0.38 | 0.21 | 1 | Matrix Fibroblasts |
| <i>GSTM3</i>        | 0.4  | 0.00 | 0.00 | 0.36 | 0.18 | 1 | Matrix Fibroblasts |
| <i>NDN</i>          | 0.4  | 0.00 | 0.00 | 0.50 | 0.32 | 1 | Matrix Fibroblasts |
| <i>CCL2</i>         | 0.4  | 0.00 | 0.00 | 0.36 | 0.14 | 1 | Matrix Fibroblasts |
| <i>MFAP2</i>        | 0.4  | 0.00 | 0.00 | 0.42 | 0.26 | 1 | Matrix Fibroblasts |
| <i>RP11-693N9.2</i> | 0.4  | 0.00 | 0.00 | 0.31 | 0.14 | 1 | Matrix Fibroblasts |
| <i>CLEC11A</i>      | 0.39 | 0.00 | 0.00 | 0.36 | 0.18 | 1 | Matrix Fibroblasts |
| <i>LAPTM4A</i>      | 0.39 | 0.00 | 0.00 | 0.94 | 0.83 | 1 | Matrix Fibroblasts |
| <i>MYL6B</i>        | 0.39 | 0.00 | 0.00 | 0.40 | 0.25 | 1 | Matrix Fibroblasts |
| <i>AKAP9</i>        | 0.39 | 0.00 | 0.00 | 0.53 | 0.38 | 1 | Matrix Fibroblasts |
| <i>EFEMP2</i>       | 0.39 | 0.00 | 0.00 | 0.53 | 0.34 | 1 | Matrix Fibroblasts |
| <i>NR2F1-AS1</i>    | 0.39 | 0.00 | 0.00 | 0.26 | 0.09 | 1 | Matrix Fibroblasts |
| <i>RPL11</i>        | 0.39 | 0.00 | 0.00 | 1.00 | 0.99 | 1 | Matrix Fibroblasts |
| <i>HSPB6</i>        | 0.38 | 0.00 | 0.00 | 0.28 | 0.13 | 1 | Matrix Fibroblasts |
| <i>FSTL1</i>        | 0.38 | 0.00 | 0.00 | 0.60 | 0.41 | 1 | Matrix Fibroblasts |
| <i>BTG1</i>         | 0.38 | 0.00 | 0.00 | 0.81 | 0.66 | 1 | Matrix Fibroblasts |
| <i>SEC62</i>        | 0.38 | 0.00 | 0.00 | 0.82 | 0.69 | 1 | Matrix Fibroblasts |
| <i>NFIA</i>         | 0.38 | 0.00 | 0.00 | 0.50 | 0.36 | 1 | Matrix Fibroblasts |
| <i>NUPR1</i>        | 0.37 | 0.00 | 0.00 | 0.69 | 0.47 | 1 | Matrix Fibroblasts |
| <i>C5orf15</i>      | 0.37 | 0.00 | 0.00 | 0.37 | 0.22 | 1 | Matrix Fibroblasts |
| <i>TRIP10</i>       | 0.36 | 0.00 | 0.00 | 0.31 | 0.16 | 1 | Matrix Fibroblasts |
| <i>C7orf73</i>      | 0.36 | 0.00 | 0.00 | 0.44 | 0.31 | 1 | Matrix Fibroblasts |
| <i>BAG2</i>         | 0.36 | 0.00 | 0.00 | 0.31 | 0.14 | 1 | Matrix Fibroblasts |
| <i>11-Sep</i>       | 0.36 | 0.00 | 0.00 | 0.45 | 0.29 | 1 | Matrix Fibroblasts |

|              |      |      |      |      |      |   |                    |
|--------------|------|------|------|------|------|---|--------------------|
| MEG3         | 0.35 | 0.00 | 0.00 | 0.64 | 0.41 | 1 | Matrix Fibroblasts |
| CREG1        | 0.35 | 0.00 | 0.00 | 0.29 | 0.16 | 1 | Matrix Fibroblasts |
| CYBRD1       | 0.35 | 0.00 | 0.00 | 0.28 | 0.14 | 1 | Matrix Fibroblasts |
| LRRC75A-AS1  | 0.35 | 0.00 | 0.00 | 0.94 | 0.86 | 1 | Matrix Fibroblasts |
| FAM127A      | 0.35 | 0.00 | 0.00 | 0.49 | 0.35 | 1 | Matrix Fibroblasts |
| MAGED1       | 0.35 | 0.00 | 0.00 | 0.30 | 0.18 | 1 | Matrix Fibroblasts |
| NRP1         | 0.35 | 0.00 | 0.00 | 0.32 | 0.18 | 1 | Matrix Fibroblasts |
| PLSCR4       | 0.35 | 0.00 | 0.00 | 0.30 | 0.16 | 1 | Matrix Fibroblasts |
| TMEM9        | 0.35 | 0.00 | 0.00 | 0.31 | 0.17 | 1 | Matrix Fibroblasts |
| RAB13        | 0.34 | 0.00 | 0.00 | 0.58 | 0.47 | 1 | Matrix Fibroblasts |
| OSTC         | 0.34 | 0.00 | 0.00 | 0.63 | 0.51 | 1 | Matrix Fibroblasts |
| SRI          | 0.34 | 0.00 | 0.00 | 0.51 | 0.36 | 1 | Matrix Fibroblasts |
| DYNC1I2      | 0.34 | 0.00 | 0.00 | 0.64 | 0.58 | 1 | Matrix Fibroblasts |
| RPS20        | 0.34 | 0.00 | 0.00 | 0.99 | 0.97 | 1 | Matrix Fibroblasts |
| PTK7         | 0.34 | 0.00 | 0.00 | 0.32 | 0.19 | 1 | Matrix Fibroblasts |
| ST13         | 0.34 | 0.00 | 0.00 | 0.70 | 0.63 | 1 | Matrix Fibroblasts |
| ADAM9        | 0.34 | 0.00 | 0.00 | 0.26 | 0.15 | 1 | Matrix Fibroblasts |
| AKAP12       | 0.34 | 0.00 | 0.00 | 0.39 | 0.20 | 1 | Matrix Fibroblasts |
| CAPZB        | 0.33 | 0.00 | 0.00 | 0.73 | 0.62 | 1 | Matrix Fibroblasts |
| HMGN1        | 0.33 | 0.00 | 0.00 | 0.72 | 0.60 | 1 | Matrix Fibroblasts |
| FOXO3        | 0.33 | 0.00 | 0.00 | 0.32 | 0.20 | 1 | Matrix Fibroblasts |
| ZNF106       | 0.33 | 0.00 | 0.00 | 0.26 | 0.13 | 1 | Matrix Fibroblasts |
| ADH5         | 0.33 | 0.00 | 0.00 | 0.45 | 0.33 | 1 | Matrix Fibroblasts |
| RRBP1        | 0.33 | 0.00 | 0.00 | 0.38 | 0.32 | 1 | Matrix Fibroblasts |
| ECHDC2       | 0.32 | 0.00 | 0.00 | 0.27 | 0.15 | 1 | Matrix Fibroblasts |
| GSTA4        | 0.32 | 0.00 | 0.00 | 0.26 | 0.15 | 1 | Matrix Fibroblasts |
| IL6ST        | 0.32 | 0.00 | 0.00 | 0.37 | 0.25 | 1 | Matrix Fibroblasts |
| CCDC80       | 0.32 | 0.00 | 0.00 | 0.31 | 0.23 | 1 | Matrix Fibroblasts |
| NUCKS1       | 0.32 | 0.00 | 0.00 | 0.79 | 0.71 | 1 | Matrix Fibroblasts |
| FBN1         | 0.32 | 0.00 | 0.00 | 0.28 | 0.14 | 1 | Matrix Fibroblasts |
| LIMA1        | 0.32 | 0.00 | 0.00 | 0.32 | 0.20 | 1 | Matrix Fibroblasts |
| FAM43A       | 0.32 | 0.00 | 0.00 | 0.26 | 0.13 | 1 | Matrix Fibroblasts |
| NPM1         | 0.32 | 0.00 | 0.00 | 0.93 | 0.87 | 1 | Matrix Fibroblasts |
| ARID5B       | 0.31 | 0.00 | 0.00 | 0.40 | 0.28 | 1 | Matrix Fibroblasts |
| ACTG1        | 0.31 | 0.00 | 0.00 | 0.98 | 0.95 | 1 | Matrix Fibroblasts |
| RPL7AP66     | 0.31 | 0.00 | 0.00 | 0.54 | 0.44 | 1 | Matrix Fibroblasts |
| CEBPB        | 0.31 | 0.00 | 0.00 | 0.41 | 0.29 | 1 | Matrix Fibroblasts |
| CDKN1C       | 0.31 | 0.00 | 0.00 | 0.32 | 0.19 | 1 | Matrix Fibroblasts |
| ZFAS1        | 0.31 | 0.00 | 0.00 | 0.70 | 0.57 | 1 | Matrix Fibroblasts |
| C6orf48      | 0.3  | 0.00 | 0.00 | 0.71 | 0.58 | 1 | Matrix Fibroblasts |
| DCXR         | 0.3  | 0.00 | 0.00 | 0.27 | 0.18 | 1 | Matrix Fibroblasts |
| RP11-114H7.1 | 0.29 | 0.00 | 0.00 | 0.66 | 0.57 | 1 | Matrix Fibroblasts |

|                 |      |      |      |      |      |   |                     |
|-----------------|------|------|------|------|------|---|---------------------|
| <i>AKR7A2</i>   | 0.29 | 0.00 | 0.00 | 0.33 | 0.22 | 1 | Matrix Fibroblasts  |
| <i>ZEB2</i>     | 0.29 | 0.00 | 0.00 | 0.57 | 0.41 | 1 | Matrix Fibroblasts  |
| <i>HOXB4</i>    | 0.29 | 0.00 | 0.00 | 0.26 | 0.15 | 1 | Matrix Fibroblasts  |
| <i>RCN1</i>     | 0.29 | 0.00 | 0.00 | 0.51 | 0.37 | 1 | Matrix Fibroblasts  |
| <i>MGST3</i>    | 0.29 | 0.00 | 0.00 | 0.74 | 0.64 | 1 | Matrix Fibroblasts  |
| <i>PNRC1</i>    | 0.29 | 0.00 | 0.00 | 0.68 | 0.58 | 1 | Matrix Fibroblasts  |
| <i>FBXO17</i>   | 0.29 | 0.00 | 0.00 | 0.28 | 0.17 | 1 | Matrix Fibroblasts  |
| <i>HSD17B11</i> | 0.29 | 0.00 | 0.00 | 0.34 | 0.22 | 1 | Matrix Fibroblasts  |
| <i>HMGN2</i>    | 0.28 | 0.00 | 0.00 | 0.76 | 0.67 | 1 | Matrix Fibroblasts  |
| <i>ELN</i>      | 0.28 | 0.00 | 0.00 | 0.79 | 0.50 | 1 | Matrix Fibroblasts  |
| <i>COX7A2L</i>  | 0.28 | 0.00 | 0.00 | 0.54 | 0.47 | 1 | Matrix Fibroblasts  |
| <i>UBE2E3</i>   | 0.28 | 0.00 | 0.00 | 0.45 | 0.35 | 1 | Matrix Fibroblasts  |
| <i>AZI2</i>     | 0.28 | 0.00 | 0.00 | 0.26 | 0.16 | 1 | Matrix Fibroblasts  |
| <i>PGRMC1</i>   | 0.28 | 0.00 | 0.00 | 0.49 | 0.38 | 1 | Matrix Fibroblasts  |
| <i>TSC22D3</i>  | 0.28 | 0.00 | 0.00 | 0.46 | 0.34 | 1 | Matrix Fibroblasts  |
| <i>TECR</i>     | 0.28 | 0.00 | 0.00 | 0.38 | 0.28 | 1 | Matrix Fibroblasts  |
| <i>RPL13AP5</i> | 0.28 | 0.00 | 0.00 | 0.97 | 0.93 | 1 | Matrix Fibroblasts  |
| <i>HEBP1</i>    | 0.28 | 0.00 | 0.00 | 0.26 | 0.17 | 1 | Matrix Fibroblasts  |
| <i>SSR2</i>     | 0.28 | 0.00 | 0.00 | 0.78 | 0.71 | 1 | Matrix Fibroblasts  |
| <i>MEIS1</i>    | 0.28 | 0.00 | 0.00 | 0.28 | 0.18 | 1 | Matrix Fibroblasts  |
| <i>TSPYL1</i>   | 0.28 | 0.00 | 0.00 | 0.31 | 0.21 | 1 | Matrix Fibroblasts  |
| <i>KDELR1</i>   | 0.28 | 0.00 | 0.00 | 0.46 | 0.38 | 1 | Matrix Fibroblasts  |
| <i>KANK2</i>    | 0.27 | 0.00 | 0.00 | 0.45 | 0.33 | 1 | Matrix Fibroblasts  |
| <i>HDCC2</i>    | 0.27 | 0.00 | 0.00 | 0.32 | 0.21 | 1 | Matrix Fibroblasts  |
| <i>SMIM14</i>   | 0.27 | 0.00 | 0.00 | 0.31 | 0.21 | 1 | Matrix Fibroblasts  |
| <i>CCNG1</i>    | 0.27 | 0.00 | 0.00 | 0.29 | 0.19 | 1 | Matrix Fibroblasts  |
| <i>MARCKS</i>   | 0.27 | 0.00 | 0.00 | 0.65 | 0.51 | 1 | Matrix Fibroblasts  |
| <i>FKBP7</i>    | 0.27 | 0.00 | 0.00 | 0.29 | 0.18 | 1 | Matrix Fibroblasts  |
| <i>RPL7AP6</i>  | 0.27 | 0.00 | 0.00 | 0.64 | 0.55 | 1 | Matrix Fibroblasts  |
| <i>TMEM47</i>   | 0.27 | 0.00 | 0.00 | 0.27 | 0.16 | 1 | Matrix Fibroblasts  |
| <i>RPL31</i>    | 0.27 | 0.00 | 0.00 | 1.00 | 0.98 | 1 | Matrix Fibroblasts  |
| <i>MLLT4</i>    | 0.26 | 0.00 | 0.00 | 0.25 | 0.16 | 1 | Matrix Fibroblasts  |
| <i>GLTSCR2</i>  | 0.26 | 0.00 | 0.00 | 0.80 | 0.72 | 1 | Matrix Fibroblasts  |
| <i>TMEM59</i>   | 0.26 | 0.00 | 0.00 | 0.75 | 0.67 | 1 | Matrix Fibroblasts  |
| <i>DPYSL2</i>   | 0.26 | 0.00 | 0.00 | 0.37 | 0.29 | 1 | Matrix Fibroblasts  |
| <i>CD81</i>     | 0.26 | 0.00 | 0.00 | 0.49 | 0.38 | 1 | Matrix Fibroblasts  |
| <i>HMGN3</i>    | 0.26 | 0.00 | 0.00 | 0.53 | 0.48 | 1 | Matrix Fibroblasts  |
| <i>RPL13A</i>   | 0.25 | 0.00 | 0.00 | 1.00 | 1.00 | 1 | Matrix Fibroblasts  |
| <i>HMGB2</i>    | 0.25 | 0.00 | 0.00 | 0.36 | 0.24 | 1 | Matrix Fibroblasts  |
| <i>NAP1L1</i>   | 0.25 | 0.00 | 0.00 | 0.82 | 0.75 | 1 | Matrix Fibroblasts  |
| <i>PNISR</i>    | 0.25 | 0.00 | 0.00 | 0.70 | 0.63 | 1 | Matrix Fibroblasts  |
| <i>ADIRF</i>    | 2.71 | 0.00 | 0.00 | 1.00 | 0.44 | 2 | Smooth Muscle Cells |
| <i>PI15</i>     | 1.96 | 0.00 | 0.00 | 0.72 | 0.10 | 2 | Smooth Muscle Cells |

|                 |      |      |      |      |      |   |                     |
|-----------------|------|------|------|------|------|---|---------------------|
| <i>PTN</i>      | 1.77 | 0.00 | 0.00 | 0.95 | 0.24 | 2 | Smooth Muscle Cells |
| <i>SOD3</i>     | 1.52 | 0.00 | 0.00 | 0.95 | 0.36 | 2 | Smooth Muscle Cells |
| <i>PLN</i>      | 1.48 | 0.00 | 0.00 | 0.66 | 0.05 | 2 | Smooth Muscle Cells |
| <i>NTRK3</i>    | 1.46 | 0.00 | 0.00 | 0.82 | 0.08 | 2 | Smooth Muscle Cells |
| <i>NET1</i>     | 1.43 | 0.00 | 0.00 | 0.77 | 0.15 | 2 | Smooth Muscle Cells |
| <i>BCAS3</i>    | 1.37 | 0.00 | 0.00 | 0.69 | 0.11 | 2 | Smooth Muscle Cells |
| <i>PTP4A3</i>   | 1.34 | 0.00 | 0.00 | 0.76 | 0.19 | 2 | Smooth Muscle Cells |
| <i>IGFBP5</i>   | 1.25 | 0.00 | 0.00 | 0.81 | 0.24 | 2 | Smooth Muscle Cells |
| <i>EGFL6</i>    | 1.25 | 0.00 | 0.00 | 0.95 | 0.31 | 2 | Smooth Muscle Cells |
| <i>SNCG</i>     | 1.19 | 0.00 | 0.00 | 0.61 | 0.06 | 2 | Smooth Muscle Cells |
| <i>CRIP1</i>    | 1.15 | 0.00 | 0.00 | 0.98 | 0.47 | 2 | Smooth Muscle Cells |
| <i>KCNA5</i>    | 1.14 | 0.00 | 0.00 | 0.58 | 0.02 | 2 | Smooth Muscle Cells |
| <i>RERGL</i>    | 1.12 | 0.00 | 0.00 | 0.43 | 0.01 | 2 | Smooth Muscle Cells |
| <i>CSRP2</i>    | 1.11 | 0.00 | 0.00 | 0.67 | 0.19 | 2 | Smooth Muscle Cells |
| <i>MYL9</i>     | 1.11 | 0.00 | 0.00 | 0.99 | 0.68 | 2 | Smooth Muscle Cells |
| <i>PTK2</i>     | 1.05 | 0.00 | 0.00 | 0.78 | 0.25 | 2 | Smooth Muscle Cells |
| <i>SERPINI1</i> | 1.04 | 0.00 | 0.00 | 0.56 | 0.08 | 2 | Smooth Muscle Cells |
| <i>CRYAB</i>    | 1.04 | 0.00 | 0.00 | 0.84 | 0.29 | 2 | Smooth Muscle Cells |
| <i>FRZB</i>     | 1.04 | 0.00 | 0.00 | 0.51 | 0.05 | 2 | Smooth Muscle Cells |
| <i>TINAGL1</i>  | 1.01 | 0.00 | 0.00 | 0.90 | 0.33 | 2 | Smooth Muscle Cells |
| <i>MFGE8</i>    | 0.98 | 0.00 | 0.00 | 0.78 | 0.28 | 2 | Smooth Muscle Cells |
| <i>WFDC1</i>    | 0.95 | 0.00 | 0.00 | 0.68 | 0.19 | 2 | Smooth Muscle Cells |
| <i>MAP3K7CL</i> | 0.94 | 0.00 | 0.00 | 0.41 | 0.04 | 2 | Smooth Muscle Cells |
| <i>HES4</i>     | 0.94 | 0.00 | 0.00 | 0.74 | 0.21 | 2 | Smooth Muscle Cells |
| <i>ANGPT2</i>   | 0.91 | 0.00 | 0.00 | 0.51 | 0.06 | 2 | Smooth Muscle Cells |
| <i>ALDOC</i>    | 0.91 | 0.00 | 0.00 | 0.47 | 0.05 | 2 | Smooth Muscle Cells |
| <i>TPM2</i>     | 0.91 | 0.00 | 0.00 | 0.99 | 0.63 | 2 | Smooth Muscle Cells |
| <i>ALDH1A2</i>  | 0.9  | 0.00 | 0.00 | 0.45 | 0.04 | 2 | Smooth Muscle Cells |
| <i>OAZ2</i>     | 0.88 | 0.00 | 0.00 | 0.88 | 0.51 | 2 | Smooth Muscle Cells |
| <i>MEF2C</i>    | 0.86 | 0.00 | 0.00 | 0.82 | 0.38 | 2 | Smooth Muscle Cells |
| <i>PLAC9</i>    | 0.86 | 0.00 | 0.00 | 0.85 | 0.36 | 2 | Smooth Muscle Cells |
| <i>TAGLN</i>    | 0.84 | 0.00 | 0.00 | 0.99 | 0.58 | 2 | Smooth Muscle Cells |
| <i>ADAMTS9</i>  | 0.82 | 0.00 | 0.00 | 0.47 | 0.10 | 2 | Smooth Muscle Cells |
| <i>RCAN2</i>    | 0.82 | 0.00 | 0.00 | 0.46 | 0.03 | 2 | Smooth Muscle Cells |
| <i>CXCL12</i>   | 0.8  | 0.00 | 0.00 | 0.57 | 0.21 | 2 | Smooth Muscle Cells |
| <i>MCAM</i>     | 0.8  | 0.00 | 0.00 | 0.66 | 0.18 | 2 | Smooth Muscle Cells |
| <i>CRISPLD2</i> | 0.79 | 0.00 | 0.00 | 0.62 | 0.19 | 2 | Smooth Muscle Cells |
| <i>ZFHX3</i>    | 0.79 | 0.00 | 0.00 | 0.67 | 0.22 | 2 | Smooth Muscle Cells |
| <i>AOC3</i>     | 0.79 | 0.00 | 0.00 | 0.72 | 0.29 | 2 | Smooth Muscle Cells |
| <i>MYH11</i>    | 0.78 | 0.00 | 0.00 | 0.91 | 0.35 | 2 | Smooth Muscle Cells |
| <i>PDLIM5</i>   | 0.77 | 0.00 | 0.00 | 0.52 | 0.12 | 2 | Smooth Muscle Cells |
| <i>KCNC4</i>    | 0.75 | 0.00 | 0.00 | 0.48 | 0.06 | 2 | Smooth Muscle Cells |
| <i>IL17B</i>    | 0.75 | 0.00 | 0.00 | 0.29 | 0.03 | 2 | Smooth Muscle Cells |

|                   |      |      |      |      |      |   |                     |
|-------------------|------|------|------|------|------|---|---------------------|
| <i>GSN</i>        | 0.73 | 0.00 | 0.00 | 0.76 | 0.37 | 2 | Smooth Muscle Cells |
| <i>IGFBP7</i>     | 0.73 | 0.00 | 0.00 | 0.99 | 0.64 | 2 | Smooth Muscle Cells |
| <i>GPRC5C</i>     | 0.72 | 0.00 | 0.00 | 0.46 | 0.07 | 2 | Smooth Muscle Cells |
| <i>PRKCDBP</i>    | 0.72 | 0.00 | 0.00 | 0.76 | 0.37 | 2 | Smooth Muscle Cells |
| <i>RAN</i>        | 0.7  | 0.00 | 0.00 | 0.81 | 0.63 | 2 | Smooth Muscle Cells |
| <i>UBA2</i>       | 0.7  | 0.00 | 0.00 | 0.64 | 0.24 | 2 | Smooth Muscle Cells |
| <i>NDUFA4</i>     | 0.69 | 0.00 | 0.00 | 0.97 | 0.78 | 2 | Smooth Muscle Cells |
| <i>SLIT3</i>      | 0.69 | 0.00 | 0.00 | 0.55 | 0.13 | 2 | Smooth Muscle Cells |
| <i>CPE</i>        | 0.68 | 0.00 | 0.00 | 0.71 | 0.21 | 2 | Smooth Muscle Cells |
| <i>AC013461.1</i> | 0.68 | 0.00 | 0.00 | 0.73 | 0.33 | 2 | Smooth Muscle Cells |
| <i>PGF</i>        | 0.67 | 0.00 | 0.00 | 0.34 | 0.05 | 2 | Smooth Muscle Cells |
| <i>ARTN</i>       | 0.67 | 0.00 | 0.00 | 0.33 | 0.01 | 2 | Smooth Muscle Cells |
| <i>ALG9</i>       | 0.67 | 0.00 | 0.00 | 0.29 | 0.03 | 2 | Smooth Muscle Cells |
| <i>KLHL23</i>     | 0.66 | 0.00 | 0.00 | 0.54 | 0.16 | 2 | Smooth Muscle Cells |
| <i>SPARCL1</i>    | 0.66 | 0.00 | 0.00 | 0.95 | 0.63 | 2 | Smooth Muscle Cells |
| <i>PTPN2</i>      | 0.66 | 0.00 | 0.00 | 0.54 | 0.17 | 2 | Smooth Muscle Cells |
| <i>SGCA</i>       | 0.65 | 0.00 | 0.00 | 0.43 | 0.07 | 2 | Smooth Muscle Cells |
| <i>DSTN</i>       | 0.65 | 0.00 | 0.00 | 0.98 | 0.78 | 2 | Smooth Muscle Cells |
| <i>CASQ2</i>      | 0.65 | 0.00 | 0.00 | 0.34 | 0.01 | 2 | Smooth Muscle Cells |
| <i>ISYNA1</i>     | 0.63 | 0.00 | 0.00 | 0.53 | 0.18 | 2 | Smooth Muscle Cells |
| <i>RRAD</i>       | 0.62 | 0.00 | 0.00 | 0.50 | 0.15 | 2 | Smooth Muscle Cells |
| <i>ACTA2</i>      | 0.62 | 0.00 | 0.00 | 0.99 | 0.71 | 2 | Smooth Muscle Cells |
| <i>TSC22D1</i>    | 0.61 | 0.00 | 0.00 | 0.88 | 0.58 | 2 | Smooth Muscle Cells |
| <i>TGM2</i>       | 0.61 | 0.00 | 0.00 | 0.74 | 0.35 | 2 | Smooth Muscle Cells |
| <i>ZFP36L1</i>    | 0.61 | 0.00 | 0.00 | 0.94 | 0.72 | 2 | Smooth Muscle Cells |
| <i>THSD4</i>      | 0.6  | 0.00 | 0.00 | 0.38 | 0.07 | 2 | Smooth Muscle Cells |
| <i>CBX6</i>       | 0.6  | 0.00 | 0.00 | 0.60 | 0.27 | 2 | Smooth Muscle Cells |
| <i>TPM1</i>       | 0.59 | 0.00 | 0.00 | 0.91 | 0.56 | 2 | Smooth Muscle Cells |
| <i>GPR20</i>      | 0.59 | 0.00 | 0.00 | 0.35 | 0.04 | 2 | Smooth Muscle Cells |
| <i>MGST3</i>      | 0.59 | 0.00 | 0.00 | 0.87 | 0.62 | 2 | Smooth Muscle Cells |
| <i>COX7A1</i>     | 0.58 | 0.00 | 0.00 | 0.77 | 0.41 | 2 | Smooth Muscle Cells |
| <i>SH3BGRL</i>    | 0.57 | 0.00 | 0.00 | 0.88 | 0.59 | 2 | Smooth Muscle Cells |
| <i>HSPB2</i>      | 0.57 | 0.00 | 0.00 | 0.47 | 0.13 | 2 | Smooth Muscle Cells |
| <i>MYOM2</i>      | 0.56 | 0.00 | 0.00 | 0.33 | 0.02 | 2 | Smooth Muscle Cells |
| <i>C1QTNF1</i>    | 0.56 | 0.00 | 0.00 | 0.35 | 0.03 | 2 | Smooth Muscle Cells |
| <i>BCAM</i>       | 0.56 | 0.00 | 0.00 | 0.71 | 0.30 | 2 | Smooth Muscle Cells |
| <i>MSRB3</i>      | 0.55 | 0.00 | 0.00 | 0.56 | 0.21 | 2 | Smooth Muscle Cells |
| <i>CHCHD10</i>    | 0.55 | 0.00 | 0.00 | 0.50 | 0.16 | 2 | Smooth Muscle Cells |
| <i>PDGFRB</i>     | 0.55 | 0.00 | 0.00 | 0.86 | 0.34 | 2 | Smooth Muscle Cells |
| <i>NOL3</i>       | 0.55 | 0.00 | 0.00 | 0.35 | 0.05 | 2 | Smooth Muscle Cells |
| <i>HCFC1R1</i>    | 0.55 | 0.00 | 0.00 | 0.47 | 0.21 | 2 | Smooth Muscle Cells |
| <i>CABP1</i>      | 0.54 | 0.00 | 0.00 | 0.27 | 0.01 | 2 | Smooth Muscle Cells |
| <i>SLC25A4</i>    | 0.54 | 0.00 | 0.00 | 0.37 | 0.14 | 2 | Smooth Muscle Cells |

|               |      |      |      |      |      |   |                     |
|---------------|------|------|------|------|------|---|---------------------|
| CARMN         | 0.54 | 0.00 | 0.00 | 0.70 | 0.31 | 2 | Smooth Muscle Cells |
| HRH2          | 0.53 | 0.00 | 0.00 | 0.42 | 0.09 | 2 | Smooth Muscle Cells |
| NRGN          | 0.52 | 0.00 | 0.00 | 0.30 | 0.04 | 2 | Smooth Muscle Cells |
| NDUFA4L2      | 0.52 | 0.00 | 0.00 | 0.57 | 0.19 | 2 | Smooth Muscle Cells |
| EDNRA         | 0.52 | 0.00 | 0.00 | 0.57 | 0.20 | 2 | Smooth Muscle Cells |
| SPATS2L       | 0.51 | 0.00 | 0.00 | 0.58 | 0.27 | 2 | Smooth Muscle Cells |
| SEPW1         | 0.51 | 0.00 | 0.00 | 0.84 | 0.53 | 2 | Smooth Muscle Cells |
| DMPK          | 0.51 | 0.00 | 0.00 | 0.33 | 0.05 | 2 | Smooth Muscle Cells |
| ENPEP         | 0.51 | 0.00 | 0.00 | 0.33 | 0.07 | 2 | Smooth Muscle Cells |
| NT5DC2        | 0.5  | 0.00 | 0.00 | 0.43 | 0.12 | 2 | Smooth Muscle Cells |
| RASL12        | 0.5  | 0.00 | 0.00 | 0.65 | 0.28 | 2 | Smooth Muscle Cells |
| APOE          | 0.5  | 0.00 | 0.00 | 0.61 | 0.29 | 2 | Smooth Muscle Cells |
| RP11-270C12.3 | 0.49 | 0.00 | 0.00 | 0.57 | 0.27 | 2 | Smooth Muscle Cells |
| CDH6          | 0.49 | 0.00 | 0.00 | 0.38 | 0.09 | 2 | Smooth Muscle Cells |
| NOTCH3        | 0.49 | 0.00 | 0.00 | 0.57 | 0.19 | 2 | Smooth Muscle Cells |
| HACD1         | 0.49 | 0.00 | 0.00 | 0.38 | 0.08 | 2 | Smooth Muscle Cells |
| PDE1A         | 0.49 | 0.00 | 0.00 | 0.27 | 0.01 | 2 | Smooth Muscle Cells |
| 4-Sep         | 0.49 | 0.00 | 0.00 | 0.40 | 0.13 | 2 | Smooth Muscle Cells |
| NTF3          | 0.49 | 0.00 | 0.00 | 0.27 | 0.02 | 2 | Smooth Muscle Cells |
| SLIT2         | 0.49 | 0.00 | 0.00 | 0.45 | 0.14 | 2 | Smooth Muscle Cells |
| HEY2          | 0.49 | 0.00 | 0.00 | 0.30 | 0.02 | 2 | Smooth Muscle Cells |
| MYL6          | 0.48 | 0.00 | 0.00 | 1.00 | 0.98 | 2 | Smooth Muscle Cells |
| HSPB1         | 0.48 | 0.00 | 0.00 | 0.97 | 0.74 | 2 | Smooth Muscle Cells |
| C11orf96      | 0.48 | 0.00 | 0.00 | 0.56 | 0.27 | 2 | Smooth Muscle Cells |
| YBX3          | 0.48 | 0.00 | 0.00 | 0.66 | 0.37 | 2 | Smooth Muscle Cells |
| COX4I2        | 0.48 | 0.00 | 0.00 | 0.70 | 0.22 | 2 | Smooth Muscle Cells |
| TBX2          | 0.47 | 0.00 | 0.00 | 0.64 | 0.32 | 2 | Smooth Muscle Cells |
| JAG1          | 0.47 | 0.00 | 0.00 | 0.34 | 0.08 | 2 | Smooth Muscle Cells |
| LMOD1         | 0.47 | 0.00 | 0.00 | 0.41 | 0.11 | 2 | Smooth Muscle Cells |
| ITGA7         | 0.46 | 0.00 | 0.00 | 0.29 | 0.03 | 2 | Smooth Muscle Cells |
| EDNRB         | 0.46 | 0.00 | 0.00 | 0.64 | 0.23 | 2 | Smooth Muscle Cells |
| MTHFD2        | 0.46 | 0.00 | 0.00 | 0.36 | 0.09 | 2 | Smooth Muscle Cells |
| NUDT4         | 0.46 | 0.00 | 0.00 | 0.54 | 0.23 | 2 | Smooth Muscle Cells |
| COL18A1       | 0.45 | 0.00 | 0.00 | 0.45 | 0.15 | 2 | Smooth Muscle Cells |
| FAM107B       | 0.45 | 0.00 | 0.00 | 0.32 | 0.12 | 2 | Smooth Muscle Cells |
| ADAMTS1       | 0.45 | 0.00 | 0.00 | 0.39 | 0.17 | 2 | Smooth Muscle Cells |
| PPP1R12B      | 0.45 | 0.00 | 0.00 | 0.47 | 0.18 | 2 | Smooth Muscle Cells |
| CAP2          | 0.44 | 0.00 | 0.00 | 0.27 | 0.05 | 2 | Smooth Muscle Cells |
| AKAP12        | 0.44 | 0.00 | 0.00 | 0.40 | 0.21 | 2 | Smooth Muscle Cells |
| TLE1          | 0.44 | 0.00 | 0.00 | 0.39 | 0.13 | 2 | Smooth Muscle Cells |
| DUSP14        | 0.44 | 0.00 | 0.00 | 0.32 | 0.08 | 2 | Smooth Muscle Cells |
| PPP1R12A      | 0.44 | 0.00 | 0.00 | 0.73 | 0.44 | 2 | Smooth Muscle Cells |

|                    |      |      |      |      |      |   |                     |
|--------------------|------|------|------|------|------|---|---------------------|
| <i>FILIP1</i>      | 0.44 | 0.00 | 0.00 | 0.43 | 0.16 | 2 | Smooth Muscle Cells |
| <i>OAT</i>         | 0.44 | 0.00 | 0.00 | 0.54 | 0.25 | 2 | Smooth Muscle Cells |
| <i>TMEM51</i>      | 0.43 | 0.00 | 0.00 | 0.33 | 0.08 | 2 | Smooth Muscle Cells |
| <i>FOXS1</i>       | 0.43 | 0.00 | 0.00 | 0.42 | 0.13 | 2 | Smooth Muscle Cells |
| <i>MAP1B</i>       | 0.43 | 0.00 | 0.00 | 0.50 | 0.21 | 2 | Smooth Muscle Cells |
| <i>FAM13C</i>      | 0.43 | 0.00 | 0.00 | 0.38 | 0.13 | 2 | Smooth Muscle Cells |
| <i>TBC1D1</i>      | 0.42 | 0.00 | 0.00 | 0.34 | 0.09 | 2 | Smooth Muscle Cells |
| <i>SBSPON</i>      | 0.42 | 0.00 | 0.00 | 0.32 | 0.07 | 2 | Smooth Muscle Cells |
| <i>EEF2</i>        | 0.42 | 0.00 | 0.00 | 0.98 | 0.88 | 2 | Smooth Muscle Cells |
| <i>HSPA2</i>       | 0.41 | 0.00 | 0.00 | 0.36 | 0.15 | 2 | Smooth Muscle Cells |
| <i>PHLDA1</i>      | 0.41 | 0.00 | 0.00 | 0.46 | 0.22 | 2 | Smooth Muscle Cells |
| <i>MRPS6</i>       | 0.41 | 0.00 | 0.00 | 0.57 | 0.31 | 2 | Smooth Muscle Cells |
| <i>PDE3A</i>       | 0.4  | 0.00 | 0.00 | 0.27 | 0.03 | 2 | Smooth Muscle Cells |
| <i>HIF1A</i>       | 0.4  | 0.00 | 0.00 | 0.48 | 0.26 | 2 | Smooth Muscle Cells |
| <i>PLP2</i>        | 0.4  | 0.00 | 0.00 | 0.46 | 0.20 | 2 | Smooth Muscle Cells |
| <i>GAPDH</i>       | 0.4  | 0.00 | 0.00 | 0.98 | 0.89 | 2 | Smooth Muscle Cells |
| <i>PBX1</i>        | 0.4  | 0.00 | 0.00 | 0.52 | 0.25 | 2 | Smooth Muscle Cells |
| <i>SPEG</i>        | 0.39 | 0.00 | 0.00 | 0.34 | 0.10 | 2 | Smooth Muscle Cells |
| <i>RP4-765C7.2</i> | 0.39 | 0.00 | 0.00 | 0.70 | 0.49 | 2 | Smooth Muscle Cells |
| <i>NR4A1</i>       | 0.39 | 0.00 | 0.00 | 0.34 | 0.12 | 2 | Smooth Muscle Cells |
| <i>TBX2-AS1</i>    | 0.39 | 0.00 | 0.00 | 0.44 | 0.18 | 2 | Smooth Muscle Cells |
| <i>CDK2AP2</i>     | 0.38 | 0.00 | 0.00 | 0.31 | 0.14 | 2 | Smooth Muscle Cells |
| <i>ID4</i>         | 0.38 | 0.00 | 0.00 | 0.54 | 0.24 | 2 | Smooth Muscle Cells |
| <i>CALHM2</i>      | 0.38 | 0.00 | 0.00 | 0.31 | 0.10 | 2 | Smooth Muscle Cells |
| <i>LGALS1</i>      | 0.38 | 0.00 | 0.00 | 0.27 | 0.08 | 2 | Smooth Muscle Cells |
| <i>HEY1</i>        | 0.37 | 0.00 | 0.00 | 0.36 | 0.11 | 2 | Smooth Muscle Cells |
| <i>C1QTNF2</i>     | 0.37 | 0.00 | 0.00 | 0.30 | 0.08 | 2 | Smooth Muscle Cells |
| <i>INHBA</i>       | 0.37 | 0.00 | 0.00 | 0.25 | 0.03 | 2 | Smooth Muscle Cells |
| <i>FAM129A</i>     | 0.37 | 0.00 | 0.00 | 0.26 | 0.05 | 2 | Smooth Muscle Cells |
| <i>CD9</i>         | 0.37 | 0.00 | 0.00 | 0.80 | 0.42 | 2 | Smooth Muscle Cells |
| <i>NUPR1</i>       | 0.37 | 0.00 | 0.00 | 0.79 | 0.47 | 2 | Smooth Muscle Cells |
| <i>MT-ND1</i>      | 0.36 | 0.00 | 0.00 | 1.00 | 0.97 | 2 | Smooth Muscle Cells |
| <i>C16orf45</i>    | 0.36 | 0.00 | 0.00 | 0.37 | 0.12 | 2 | Smooth Muscle Cells |
| <i>YBX1</i>        | 0.36 | 0.00 | 0.00 | 0.97 | 0.88 | 2 | Smooth Muscle Cells |
| <i>MT1E</i>        | 0.35 | 0.00 | 0.00 | 0.47 | 0.22 | 2 | Smooth Muscle Cells |
| <i>EBF1</i>        | 0.35 | 0.00 | 0.00 | 0.33 | 0.09 | 2 | Smooth Muscle Cells |
| <i>KANK2</i>       | 0.35 | 0.00 | 0.00 | 0.60 | 0.32 | 2 | Smooth Muscle Cells |
| <i>RPS2P5</i>      | 0.35 | 0.00 | 0.00 | 0.89 | 0.72 | 2 | Smooth Muscle Cells |
| <i>HSPB6</i>       | 0.35 | 0.00 | 0.00 | 0.32 | 0.13 | 2 | Smooth Muscle Cells |
| <i>SDF2L1</i>      | 0.35 | 0.00 | 0.03 | 0.31 | 0.22 | 2 | Smooth Muscle Cells |
| <i>ALDOA</i>       | 0.35 | 0.00 | 0.00 | 0.89 | 0.68 | 2 | Smooth Muscle Cells |
| <i>TMEM136</i>     | 0.34 | 0.00 | 0.00 | 0.26 | 0.06 | 2 | Smooth Muscle Cells |

|                      |      |      |      |      |      |   |                     |
|----------------------|------|------|------|------|------|---|---------------------|
| <i>RP11-756G12.1</i> | 0.34 | 0.00 | 0.00 | 0.31 | 0.08 | 2 | Smooth Muscle Cells |
| <i>PHPT1</i>         | 0.34 | 0.00 | 0.00 | 0.68 | 0.43 | 2 | Smooth Muscle Cells |
| <i>FOS</i>           | 0.34 | 0.00 | 0.00 | 0.51 | 0.33 | 2 | Smooth Muscle Cells |
| <i>EEF1A1P5</i>      | 0.34 | 0.00 | 0.00 | 0.84 | 0.64 | 2 | Smooth Muscle Cells |
| <i>CYSTM1</i>        | 0.34 | 0.00 | 0.00 | 0.58 | 0.31 | 2 | Smooth Muscle Cells |
| <i>ARID5A</i>        | 0.34 | 0.00 | 0.00 | 0.37 | 0.14 | 2 | Smooth Muscle Cells |
| <i>MT-ND3</i>        | 0.34 | 0.00 | 0.00 | 1.00 | 0.98 | 2 | Smooth Muscle Cells |
| <i>PTGIR</i>         | 0.34 | 0.00 | 0.00 | 0.37 | 0.14 | 2 | Smooth Muscle Cells |
| <i>PLPP3</i>         | 0.34 | 0.00 | 0.00 | 0.50 | 0.27 | 2 | Smooth Muscle Cells |
| <i>YWHAQ</i>         | 0.34 | 0.00 | 0.00 | 0.85 | 0.62 | 2 | Smooth Muscle Cells |
| <i>PLK2</i>          | 0.33 | 0.00 | 0.00 | 0.37 | 0.18 | 2 | Smooth Muscle Cells |
| <i>HSPB7</i>         | 0.33 | 0.00 | 0.00 | 0.28 | 0.08 | 2 | Smooth Muscle Cells |
| <i>ARL3</i>          | 0.33 | 0.00 | 0.00 | 0.52 | 0.28 | 2 | Smooth Muscle Cells |
| <i>CD82</i>          | 0.33 | 0.00 | 0.00 | 0.49 | 0.24 | 2 | Smooth Muscle Cells |
| <i>TGFB11</i>        | 0.33 | 0.00 | 0.00 | 0.67 | 0.40 | 2 | Smooth Muscle Cells |
| <i>ARHGEF7</i>       | 0.33 | 0.00 | 0.00 | 0.26 | 0.07 | 2 | Smooth Muscle Cells |
| <i>POLD2</i>         | 0.32 | 0.00 | 0.00 | 0.44 | 0.21 | 2 | Smooth Muscle Cells |
| <i>RAD23A</i>        | 0.32 | 0.00 | 0.00 | 0.66 | 0.43 | 2 | Smooth Muscle Cells |
| <i>COX7A2</i>        | 0.32 | 0.00 | 0.00 | 0.93 | 0.78 | 2 | Smooth Muscle Cells |
| <i>ST6GALNAC6</i>    | 0.32 | 0.00 | 0.00 | 0.39 | 0.16 | 2 | Smooth Muscle Cells |
| <i>GRK5</i>          | 0.32 | 0.00 | 0.00 | 0.39 | 0.17 | 2 | Smooth Muscle Cells |
| <i>PTMAP5</i>        | 0.32 | 0.00 | 0.00 | 0.85 | 0.67 | 2 | Smooth Muscle Cells |
| <i>CTNNB1</i>        | 0.32 | 0.00 | 0.00 | 0.52 | 0.36 | 2 | Smooth Muscle Cells |
| <i>MPRIP</i>         | 0.31 | 0.00 | 0.00 | 0.41 | 0.19 | 2 | Smooth Muscle Cells |
| <i>GSTP1</i>         | 0.31 | 0.00 | 0.00 | 0.96 | 0.81 | 2 | Smooth Muscle Cells |
| <i>B3GNT2</i>        | 0.31 | 0.00 | 0.00 | 0.26 | 0.07 | 2 | Smooth Muscle Cells |
| <i>AC090498.1</i>    | 0.31 | 0.00 | 0.00 | 0.99 | 0.93 | 2 | Smooth Muscle Cells |
| <i>MTND1P23</i>      | 0.31 | 0.00 | 0.00 | 0.70 | 0.45 | 2 | Smooth Muscle Cells |
| <i>RPL23AP42</i>     | 0.31 | 0.00 | 0.00 | 0.85 | 0.65 | 2 | Smooth Muscle Cells |
| <i>DNAJB9</i>        | 0.31 | 0.00 | 0.00 | 0.27 | 0.15 | 2 | Smooth Muscle Cells |
| <i>COX7B</i>         | 0.31 | 0.00 | 0.00 | 0.81 | 0.60 | 2 | Smooth Muscle Cells |
| <i>MAPRE2</i>        | 0.31 | 0.00 | 0.00 | 0.32 | 0.12 | 2 | Smooth Muscle Cells |
| <i>MAFB</i>          | 0.31 | 0.00 | 0.00 | 0.39 | 0.23 | 2 | Smooth Muscle Cells |
| <i>MLEC</i>          | 0.31 | 0.00 | 0.00 | 0.43 | 0.20 | 2 | Smooth Muscle Cells |
| <i>CTBP2</i>         | 0.31 | 0.00 | 0.00 | 0.42 | 0.21 | 2 | Smooth Muscle Cells |
| <i>LDHB</i>          | 0.31 | 0.00 | 0.00 | 0.84 | 0.59 | 2 | Smooth Muscle Cells |
| <i>CHURC1</i>        | 0.31 | 0.00 | 0.00 | 0.56 | 0.35 | 2 | Smooth Muscle Cells |
| <i>RPL5P34</i>       | 0.31 | 0.00 | 0.00 | 0.91 | 0.73 | 2 | Smooth Muscle Cells |
| <i>ANGPTL4</i>       | 0.31 | 0.00 | 0.00 | 0.30 | 0.12 | 2 | Smooth Muscle Cells |
| <i>NDUFB9</i>        | 0.31 | 0.00 | 0.00 | 0.74 | 0.51 | 2 | Smooth Muscle Cells |
| <i>PPP1R14A</i>      | 0.31 | 0.00 | 0.00 | 0.64 | 0.41 | 2 | Smooth Muscle Cells |
| <i>CAMK2G</i>        | 0.3  | 0.00 | 0.00 | 0.29 | 0.10 | 2 | Smooth Muscle Cells |

|                       |      |      |      |      |      |   |                     |
|-----------------------|------|------|------|------|------|---|---------------------|
| <i>ATP5D</i>          | 0.3  | 0.00 | 0.00 | 0.82 | 0.62 | 2 | Smooth Muscle Cells |
| <i>MT-RNR1</i>        | 0.3  | 0.00 | 0.02 | 0.97 | 0.95 | 2 | Smooth Muscle Cells |
| <i>MT-RNR2</i>        | 0.3  | 0.00 | 0.00 | 1.00 | 1.00 | 2 | Smooth Muscle Cells |
| <i>PTMAP2</i>         | 0.3  | 0.00 | 0.00 | 0.78 | 0.60 | 2 | Smooth Muscle Cells |
| <i>ARPC5</i>          | 0.3  | 0.00 | 0.00 | 0.82 | 0.63 | 2 | Smooth Muscle Cells |
| <i>COX6A1</i>         | 0.3  | 0.00 | 0.00 | 0.91 | 0.73 | 2 | Smooth Muscle Cells |
| <i>GPM6B</i>          | 0.29 | 0.00 | 0.00 | 0.53 | 0.27 | 2 | Smooth Muscle Cells |
| <i>VIM</i>            | 0.29 | 0.00 | 0.00 | 1.00 | 0.94 | 2 | Smooth Muscle Cells |
| <i>GNG2</i>           | 0.29 | 0.00 | 0.00 | 0.30 | 0.14 | 2 | Smooth Muscle Cells |
| <i>RPS2</i>           | 0.29 | 0.00 | 0.00 | 1.00 | 0.99 | 2 | Smooth Muscle Cells |
| <i>FKBP4</i>          | 0.29 | 0.00 | 0.00 | 0.37 | 0.17 | 2 | Smooth Muscle Cells |
| <i>PTMA</i>           | 0.29 | 0.00 | 0.00 | 1.00 | 1.00 | 2 | Smooth Muscle Cells |
| <i>PLS3</i>           | 0.29 | 0.00 | 0.00 | 0.65 | 0.41 | 2 | Smooth Muscle Cells |
| <i>MOB2</i>           | 0.29 | 0.00 | 0.00 | 0.40 | 0.20 | 2 | Smooth Muscle Cells |
| <i>MT-ND4L</i>        | 0.29 | 0.00 | 0.00 | 0.86 | 0.70 | 2 | Smooth Muscle Cells |
| <i>RPL7P1</i>         | 0.28 | 0.00 | 0.00 | 0.88 | 0.65 | 2 | Smooth Muscle Cells |
| <i>PPP2R5E</i>        | 0.28 | 0.00 | 0.00 | 0.34 | 0.16 | 2 | Smooth Muscle Cells |
| <i>CTB-63M22.1</i>    | 0.28 | 0.00 | 0.00 | 0.80 | 0.58 | 2 | Smooth Muscle Cells |
| <i>EMD</i>            | 0.28 | 0.00 | 0.00 | 0.37 | 0.17 | 2 | Smooth Muscle Cells |
| <i>RPL14</i>          | 0.28 | 0.00 | 0.00 | 1.00 | 0.95 | 2 | Smooth Muscle Cells |
| <i>RP11-371A22.1</i>  | 0.28 | 0.00 | 0.00 | 0.97 | 0.85 | 2 | Smooth Muscle Cells |
| <i>EIF3D</i>          | 0.28 | 0.00 | 0.00 | 0.66 | 0.44 | 2 | Smooth Muscle Cells |
| <i>CYC1</i>           | 0.28 | 0.00 | 0.00 | 0.62 | 0.40 | 2 | Smooth Muscle Cells |
| <i>FXYP1</i>          | 0.28 | 0.00 | 0.00 | 0.48 | 0.25 | 2 | Smooth Muscle Cells |
| <i>HIGD1B</i>         | 0.28 | 0.00 | 0.00 | 0.70 | 0.24 | 2 | Smooth Muscle Cells |
| <i>RBMS1</i>          | 0.28 | 0.00 | 0.00 | 0.57 | 0.39 | 2 | Smooth Muscle Cells |
| <i>ATPAF1</i>         | 0.28 | 0.00 | 0.00 | 0.28 | 0.11 | 2 | Smooth Muscle Cells |
| <i>NDUFB7</i>         | 0.28 | 0.00 | 0.00 | 0.76 | 0.56 | 2 | Smooth Muscle Cells |
| <i>CTD-2192J16.15</i> | 0.27 | 0.00 | 0.00 | 0.97 | 0.90 | 2 | Smooth Muscle Cells |
| <i>RPL23A</i>         | 0.27 | 0.00 | 0.00 | 1.00 | 0.98 | 2 | Smooth Muscle Cells |
| <i>MT-CYB</i>         | 0.27 | 0.00 | 0.00 | 1.00 | 0.99 | 2 | Smooth Muscle Cells |
| <i>MAGEF1</i>         | 0.27 | 0.00 | 0.00 | 0.41 | 0.20 | 2 | Smooth Muscle Cells |
| <i>RPL3P4</i>         | 0.27 | 0.00 | 0.00 | 1.00 | 0.94 | 2 | Smooth Muscle Cells |
| <i>MT-ND4</i>         | 0.27 | 0.00 | 0.00 | 1.00 | 1.00 | 2 | Smooth Muscle Cells |
| <i>ARPC1A</i>         | 0.27 | 0.00 | 0.00 | 0.47 | 0.26 | 2 | Smooth Muscle Cells |
| <i>PLCE1</i>          | 0.27 | 0.00 | 0.00 | 0.26 | 0.08 | 2 | Smooth Muscle Cells |
| <i>SMIM12</i>         | 0.27 | 0.00 | 0.00 | 0.33 | 0.17 | 2 | Smooth Muscle Cells |
| <i>PNMA1</i>          | 0.27 | 0.00 | 0.00 | 0.33 | 0.15 | 2 | Smooth Muscle Cells |
| <i>RHOB</i>           | 0.27 | 0.00 | 0.00 | 0.65 | 0.46 | 2 | Smooth Muscle Cells |
| <i>SLMAP</i>          | 0.27 | 0.00 | 0.00 | 0.33 | 0.16 | 2 | Smooth Muscle Cells |
| <i>FAUP1</i>          | 0.26 | 0.00 | 0.00 | 0.81 | 0.63 | 2 | Smooth Muscle Cells |
| <i>EEF1D</i>          | 0.26 | 0.00 | 0.00 | 0.97 | 0.88 | 2 | Smooth Muscle Cells |

|                      |      |      |      |      |      |   |                     |
|----------------------|------|------|------|------|------|---|---------------------|
| <i>PLEKHA4</i>       | 0.26 | 0.00 | 0.00 | 0.29 | 0.12 | 2 | Smooth Muscle Cells |
| <i>MAP7D3</i>        | 0.26 | 0.00 | 0.00 | 0.32 | 0.14 | 2 | Smooth Muscle Cells |
| <i>MT-CO3</i>        | 0.26 | 0.00 | 0.00 | 1.00 | 0.99 | 2 | Smooth Muscle Cells |
| <i>FAU</i>           | 0.26 | 0.00 | 0.00 | 1.00 | 0.97 | 2 | Smooth Muscle Cells |
| <i>NACA</i>          | 0.26 | 0.00 | 0.00 | 0.99 | 0.93 | 2 | Smooth Muscle Cells |
| <i>NDUFA5</i>        | 0.26 | 0.00 | 0.00 | 0.63 | 0.41 | 2 | Smooth Muscle Cells |
| <i>RSL24D1</i>       | 0.26 | 0.00 | 0.00 | 0.73 | 0.49 | 2 | Smooth Muscle Cells |
| <i>PRDM6</i>         | 0.26 | 0.00 | 0.00 | 0.30 | 0.14 | 2 | Smooth Muscle Cells |
| <i>TPI1</i>          | 0.26 | 0.00 | 0.00 | 0.91 | 0.75 | 2 | Smooth Muscle Cells |
| <i>IAH1</i>          | 0.26 | 0.00 | 0.00 | 0.43 | 0.24 | 2 | Smooth Muscle Cells |
| <i>RP3-486I3.4</i>   | 0.26 | 0.00 | 0.00 | 0.86 | 0.64 | 2 | Smooth Muscle Cells |
| <i>TOB1</i>          | 0.26 | 0.00 | 0.00 | 0.29 | 0.12 | 2 | Smooth Muscle Cells |
| <i>MT-ATP6</i>       | 0.26 | 0.00 | 0.00 | 1.00 | 0.99 | 2 | Smooth Muscle Cells |
| <i>DACT3</i>         | 0.26 | 0.00 | 0.00 | 0.25 | 0.09 | 2 | Smooth Muscle Cells |
| <i>GAS5</i>          | 0.26 | 0.00 | 0.00 | 0.89 | 0.70 | 2 | Smooth Muscle Cells |
| <i>COX7C</i>         | 0.26 | 0.00 | 0.00 | 0.98 | 0.86 | 2 | Smooth Muscle Cells |
| <i>CD151</i>         | 0.25 | 0.00 | 0.00 | 0.75 | 0.52 | 2 | Smooth Muscle Cells |
| <i>RPS2P46</i>       | 0.25 | 0.00 | 0.00 | 0.68 | 0.47 | 2 | Smooth Muscle Cells |
| <i>CHRA1</i>         | 0.25 | 0.00 | 0.00 | 0.28 | 0.12 | 2 | Smooth Muscle Cells |
| <i>MTATP6P1</i>      | 0.25 | 0.00 | 0.00 | 1.00 | 0.98 | 2 | Smooth Muscle Cells |
| <i>RPL41</i>         | 0.25 | 0.00 | 0.00 | 1.00 | 1.00 | 2 | Smooth Muscle Cells |
| <i>ANAPC11</i>       | 0.25 | 0.00 | 0.00 | 0.74 | 0.55 | 2 | Smooth Muscle Cells |
| <i>RP11-572P18.1</i> | 0.25 | 0.00 | 0.00 | 0.58 | 0.39 | 2 | Smooth Muscle Cells |
| <i>RGCC</i>          | 2.26 | 0.00 | 0.00 | 0.91 | 0.28 | 3 | Endothelial Cells   |
| <i>EDN1</i>          | 2.12 | 0.00 | 0.00 | 0.64 | 0.04 | 3 | Endothelial Cells   |
| <i>RAMP2</i>         | 1.84 | 0.00 | 0.00 | 0.98 | 0.27 | 3 | Endothelial Cells   |
| <i>CA4</i>           | 1.84 | 0.00 | 0.00 | 0.76 | 0.04 | 3 | Endothelial Cells   |
| <i>IFI27</i>         | 1.84 | 0.00 | 0.00 | 0.99 | 0.30 | 3 | Endothelial Cells   |
| <i>TMEM100</i>       | 1.81 | 0.00 | 0.00 | 0.70 | 0.10 | 3 | Endothelial Cells   |
| <i>TNFSF10</i>       | 1.79 | 0.00 | 0.00 | 0.92 | 0.15 | 3 | Endothelial Cells   |
| <i>BST2</i>          | 1.75 | 0.00 | 0.00 | 0.96 | 0.23 | 3 | Endothelial Cells   |
| <i>CD93</i>          | 1.69 | 0.00 | 0.00 | 0.82 | 0.08 | 3 | Endothelial Cells   |
| <i>CLEC14A</i>       | 1.68 | 0.00 | 0.00 | 0.86 | 0.13 | 3 | Endothelial Cells   |
| <i>CALCRL</i>        | 1.64 | 0.00 | 0.00 | 0.83 | 0.13 | 3 | Endothelial Cells   |
| <i>EGFL7</i>         | 1.63 | 0.00 | 0.00 | 0.95 | 0.19 | 3 | Endothelial Cells   |
| <i>GNG11</i>         | 1.62 | 0.00 | 0.00 | 0.96 | 0.39 | 3 | Endothelial Cells   |
| <i>IL7R</i>          | 1.61 | 0.00 | 0.00 | 0.56 | 0.04 | 3 | Endothelial Cells   |
| <i>RNASE1</i>        | 1.59 | 0.00 | 0.00 | 0.93 | 0.20 | 3 | Endothelial Cells   |
| <i>CCND1</i>         | 1.57 | 0.00 | 0.00 | 0.76 | 0.17 | 3 | Endothelial Cells   |
| <i>C8orf4</i>        | 1.56 | 0.00 | 0.00 | 0.88 | 0.39 | 3 | Endothelial Cells   |
| <i>RDX</i>           | 1.56 | 0.00 | 0.00 | 0.87 | 0.39 | 3 | Endothelial Cells   |
| <i>EPAS1</i>         | 1.54 | 0.00 | 0.00 | 0.96 | 0.38 | 3 | Endothelial Cells   |

|                 |      |      |      |      |      |   |                   |
|-----------------|------|------|------|------|------|---|-------------------|
| <i>CLDN5</i>    | 1.54 | 0.00 | 0.00 | 0.92 | 0.20 | 3 | Endothelial Cells |
| <i>PCAT19</i>   | 1.47 | 0.00 | 0.00 | 0.88 | 0.11 | 3 | Endothelial Cells |
| <i>CDH5</i>     | 1.44 | 0.00 | 0.00 | 0.82 | 0.12 | 3 | Endothelial Cells |
| <i>IL33</i>     | 1.44 | 0.00 | 0.00 | 0.66 | 0.06 | 3 | Endothelial Cells |
| <i>GIMAP7</i>   | 1.42 | 0.00 | 0.00 | 0.73 | 0.11 | 3 | Endothelial Cells |
| <i>HLA-C</i>    | 1.39 | 0.00 | 0.00 | 0.97 | 0.50 | 3 | Endothelial Cells |
| <i>CD36</i>     | 1.39 | 0.00 | 0.00 | 0.66 | 0.10 | 3 | Endothelial Cells |
| <i>HPGD</i>     | 1.37 | 0.00 | 0.00 | 0.80 | 0.17 | 3 | Endothelial Cells |
| <i>ARHGAP18</i> | 1.37 | 0.00 | 0.00 | 0.65 | 0.07 | 3 | Endothelial Cells |
| <i>ACE</i>      | 1.36 | 0.00 | 0.00 | 0.68 | 0.08 | 3 | Endothelial Cells |
| <i>TIE1</i>     | 1.33 | 0.00 | 0.00 | 0.71 | 0.08 | 3 | Endothelial Cells |
| <i>IGFBP4</i>   | 1.33 | 0.00 | 0.00 | 0.98 | 0.45 | 3 | Endothelial Cells |
| <i>PECAM1</i>   | 1.33 | 0.00 | 0.00 | 0.92 | 0.19 | 3 | Endothelial Cells |
| <i>HLA-A</i>    | 1.32 | 0.00 | 0.00 | 1.00 | 0.67 | 3 | Endothelial Cells |
| <i>S100A16</i>  | 1.31 | 0.00 | 0.00 | 0.87 | 0.29 | 3 | Endothelial Cells |
| <i>HLA-B</i>    | 1.31 | 0.00 | 0.00 | 0.99 | 0.49 | 3 | Endothelial Cells |
| <i>IL32</i>     | 1.29 | 0.00 | 0.00 | 0.82 | 0.23 | 3 | Endothelial Cells |
| <i>ESAM</i>     | 1.26 | 0.00 | 0.00 | 0.88 | 0.30 | 3 | Endothelial Cells |
| <i>CD34</i>     | 1.26 | 0.00 | 0.00 | 0.65 | 0.10 | 3 | Endothelial Cells |
| <i>RAMP3</i>    | 1.24 | 0.00 | 0.00 | 0.67 | 0.11 | 3 | Endothelial Cells |
| <i>THBD</i>     | 1.23 | 0.00 | 0.00 | 0.62 | 0.10 | 3 | Endothelial Cells |
| <i>ECSCR.1</i>  | 1.23 | 0.00 | 0.00 | 0.82 | 0.13 | 3 | Endothelial Cells |
| <i>LXN</i>      | 1.22 | 0.00 | 0.00 | 0.57 | 0.12 | 3 | Endothelial Cells |
| <i>FABP5</i>    | 1.21 | 0.00 | 0.00 | 0.58 | 0.24 | 3 | Endothelial Cells |
| <i>TMEM88</i>   | 1.21 | 0.00 | 0.00 | 0.53 | 0.03 | 3 | Endothelial Cells |
| <i>VWF</i>      | 1.2  | 0.00 | 0.00 | 0.67 | 0.07 | 3 | Endothelial Cells |
| <i>PCDH17</i>   | 1.2  | 0.00 | 0.00 | 0.60 | 0.10 | 3 | Endothelial Cells |
| <i>SLC9A3R2</i> | 1.19 | 0.00 | 0.00 | 0.82 | 0.36 | 3 | Endothelial Cells |
| <i>LDB2</i>     | 1.19 | 0.00 | 0.00 | 0.73 | 0.13 | 3 | Endothelial Cells |
| <i>NOTCH4</i>   | 1.19 | 0.00 | 0.00 | 0.64 | 0.07 | 3 | Endothelial Cells |
| <i>B2M</i>      | 1.19 | 0.00 | 0.00 | 1.00 | 0.99 | 3 | Endothelial Cells |
| <i>GPIHBP1</i>  | 1.17 | 0.00 | 0.00 | 0.45 | 0.01 | 3 | Endothelial Cells |
| <i>IGFBP2</i>   | 1.17 | 0.00 | 0.00 | 0.69 | 0.13 | 3 | Endothelial Cells |
| <i>ICAM2</i>    | 1.15 | 0.00 | 0.00 | 0.76 | 0.17 | 3 | Endothelial Cells |
| <i>CYB5A</i>    | 1.14 | 0.00 | 0.00 | 0.80 | 0.30 | 3 | Endothelial Cells |
| <i>SH3BP5</i>   | 1.13 | 0.00 | 0.00 | 0.76 | 0.16 | 3 | Endothelial Cells |
| <i>SGK1</i>     | 1.13 | 0.00 | 0.00 | 0.53 | 0.12 | 3 | Endothelial Cells |
| <i>FKBP1A</i>   | 1.12 | 0.00 | 0.00 | 0.97 | 0.69 | 3 | Endothelial Cells |
| <i>ARHGAP29</i> | 1.12 | 0.00 | 0.00 | 0.82 | 0.28 | 3 | Endothelial Cells |
| <i>SOX7</i>     | 1.12 | 0.00 | 0.00 | 0.54 | 0.04 | 3 | Endothelial Cells |
| <i>HLA-E</i>    | 1.12 | 0.00 | 0.00 | 0.98 | 0.56 | 3 | Endothelial Cells |
| <i>TM4SF1</i>   | 1.11 | 0.00 | 0.00 | 0.91 | 0.35 | 3 | Endothelial Cells |
| <i>FCN3</i>     | 1.11 | 0.00 | 0.00 | 0.43 | 0.03 | 3 | Endothelial Cells |

|                 |      |      |      |      |      |   |                   |
|-----------------|------|------|------|------|------|---|-------------------|
| <i>CCDC85B</i>  | 1.11 | 0.00 | 0.00 | 0.86 | 0.36 | 3 | Endothelial Cells |
| <i>ROBO4</i>    | 1.11 | 0.00 | 0.00 | 0.61 | 0.06 | 3 | Endothelial Cells |
| <i>ACVRL1</i>   | 1.11 | 0.00 | 0.00 | 0.70 | 0.11 | 3 | Endothelial Cells |
| <i>PRCP</i>     | 1.1  | 0.00 | 0.00 | 0.67 | 0.20 | 3 | Endothelial Cells |
| <i>ITM2A</i>    | 1.1  | 0.00 | 0.00 | 0.75 | 0.13 | 3 | Endothelial Cells |
| <i>CAV1</i>     | 1.1  | 0.00 | 0.00 | 0.99 | 0.81 | 3 | Endothelial Cells |
| <i>GIMAP4</i>   | 1.09 | 0.00 | 0.00 | 0.67 | 0.14 | 3 | Endothelial Cells |
| <i>EMCN</i>     | 1.08 | 0.00 | 0.00 | 0.62 | 0.12 | 3 | Endothelial Cells |
| <i>VAMP5</i>    | 1.08 | 0.00 | 0.00 | 0.91 | 0.48 | 3 | Endothelial Cells |
| <i>ID1</i>      | 1.07 | 0.00 | 0.00 | 0.75 | 0.30 | 3 | Endothelial Cells |
| <i>SOX18</i>    | 1.07 | 0.00 | 0.00 | 0.59 | 0.06 | 3 | Endothelial Cells |
| <i>RALA</i>     | 1.07 | 0.00 | 0.00 | 0.72 | 0.25 | 3 | Endothelial Cells |
| <i>TSPAN7</i>   | 1.06 | 0.00 | 0.00 | 0.58 | 0.08 | 3 | Endothelial Cells |
| <i>SDPR</i>     | 1.06 | 0.00 | 0.00 | 0.72 | 0.20 | 3 | Endothelial Cells |
| <i>APLNR</i>    | 1.05 | 0.00 | 0.00 | 0.58 | 0.07 | 3 | Endothelial Cells |
| <i>CLEC2B</i>   | 1.05 | 0.00 | 0.00 | 0.61 | 0.12 | 3 | Endothelial Cells |
| <i>THSD1</i>    | 1.04 | 0.00 | 0.00 | 0.53 | 0.05 | 3 | Endothelial Cells |
| <i>GMFG</i>     | 1.03 | 0.00 | 0.00 | 0.79 | 0.22 | 3 | Endothelial Cells |
| <i>MARCKSL1</i> | 1.03 | 0.00 | 0.00 | 0.89 | 0.58 | 3 | Endothelial Cells |
| <i>CTNND1</i>   | 1.01 | 0.00 | 0.00 | 0.68 | 0.20 | 3 | Endothelial Cells |
| <i>KIT</i>      | 1.01 | 0.00 | 0.00 | 0.45 | 0.01 | 3 | Endothelial Cells |
| <i>PALMD</i>    | 1    | 0.00 | 0.00 | 0.48 | 0.04 | 3 | Endothelial Cells |
| <i>CYYR1</i>    | 1    | 0.00 | 0.00 | 0.55 | 0.07 | 3 | Endothelial Cells |
| <i>LEPR</i>     | 0.99 | 0.00 | 0.00 | 0.47 | 0.04 | 3 | Endothelial Cells |
| <i>FENDRR</i>   | 0.99 | 0.00 | 0.00 | 0.57 | 0.11 | 3 | Endothelial Cells |
| <i>NUDT4</i>    | 0.98 | 0.00 | 0.00 | 0.59 | 0.22 | 3 | Endothelial Cells |
| <i>RGS5</i>     | 0.97 | 0.00 | 0.00 | 0.71 | 0.19 | 3 | Endothelial Cells |
| <i>H19</i>      | 0.96 | 0.00 | 0.00 | 0.46 | 0.13 | 3 | Endothelial Cells |
| <i>CAV2</i>     | 0.95 | 0.00 | 0.00 | 0.91 | 0.55 | 3 | Endothelial Cells |
| <i>LYVE1</i>    | 0.94 | 0.00 | 0.00 | 0.38 | 0.03 | 3 | Endothelial Cells |
| <i>ID3</i>      | 0.94 | 0.00 | 0.00 | 0.86 | 0.50 | 3 | Endothelial Cells |
| <i>DUSP6</i>    | 0.94 | 0.00 | 0.00 | 0.55 | 0.15 | 3 | Endothelial Cells |
| <i>EFNA1</i>    | 0.93 | 0.00 | 0.00 | 0.55 | 0.10 | 3 | Endothelial Cells |
| <i>PTRF</i>     | 0.93 | 0.00 | 0.00 | 0.95 | 0.66 | 3 | Endothelial Cells |
| <i>TMSB10</i>   | 0.92 | 0.00 | 0.00 | 1.00 | 0.99 | 3 | Endothelial Cells |
| <i>C1orf54</i>  | 0.92 | 0.00 | 0.00 | 0.54 | 0.15 | 3 | Endothelial Cells |
| <i>JAM2</i>     | 0.92 | 0.00 | 0.00 | 0.52 | 0.08 | 3 | Endothelial Cells |
| <i>WARS</i>     | 0.9  | 0.00 | 0.00 | 0.55 | 0.16 | 3 | Endothelial Cells |
| <i>HYAL2</i>    | 0.9  | 0.00 | 0.00 | 0.61 | 0.19 | 3 | Endothelial Cells |
| <i>LIFR</i>     | 0.9  | 0.00 | 0.00 | 0.47 | 0.09 | 3 | Endothelial Cells |
| <i>KDR</i>      | 0.9  | 0.00 | 0.00 | 0.48 | 0.05 | 3 | Endothelial Cells |
| <i>RALB</i>     | 0.89 | 0.00 | 0.00 | 0.54 | 0.15 | 3 | Endothelial Cells |
| <i>CARHSP1</i>  | 0.89 | 0.00 | 0.00 | 0.71 | 0.33 | 3 | Endothelial Cells |

|                 |      |      |      |      |      |   |                   |
|-----------------|------|------|------|------|------|---|-------------------|
| <i>FAM167B</i>  | 0.88 | 0.00 | 0.00 | 0.44 | 0.05 | 3 | Endothelial Cells |
| <i>MYZAP</i>    | 0.88 | 0.00 | 0.00 | 0.51 | 0.06 | 3 | Endothelial Cells |
| <i>STXBP6</i>   | 0.88 | 0.00 | 0.00 | 0.54 | 0.11 | 3 | Endothelial Cells |
| <i>POSTN</i>    | 0.87 | 0.00 | 0.00 | 0.56 | 0.18 | 3 | Endothelial Cells |
| <i>PLK2</i>     | 0.86 | 0.00 | 0.00 | 0.56 | 0.16 | 3 | Endothelial Cells |
| <i>ETS2</i>     | 0.86 | 0.00 | 0.00 | 0.65 | 0.24 | 3 | Endothelial Cells |
| <i>KIAA1462</i> | 0.86 | 0.00 | 0.00 | 0.53 | 0.09 | 3 | Endothelial Cells |
| <i>PSMB9</i>    | 0.86 | 0.00 | 0.00 | 0.63 | 0.17 | 3 | Endothelial Cells |
| <i>BCAM</i>     | 0.85 | 0.00 | 0.00 | 0.76 | 0.29 | 3 | Endothelial Cells |
| <i>FSCN1</i>    | 0.85 | 0.00 | 0.00 | 0.65 | 0.18 | 3 | Endothelial Cells |
| <i>ITGA6</i>    | 0.84 | 0.00 | 0.00 | 0.42 | 0.03 | 3 | Endothelial Cells |
| <i>GNAI2</i>    | 0.84 | 0.00 | 0.00 | 0.71 | 0.31 | 3 | Endothelial Cells |
| <i>SEC14L1</i>  | 0.84 | 0.00 | 0.00 | 0.51 | 0.10 | 3 | Endothelial Cells |
| <i>LY6E</i>     | 0.83 | 0.00 | 0.00 | 0.78 | 0.42 | 3 | Endothelial Cells |
| <i>FOXF1</i>    | 0.83 | 0.00 | 0.00 | 0.65 | 0.22 | 3 | Endothelial Cells |
| <i>FLI1</i>     | 0.83 | 0.00 | 0.00 | 0.49 | 0.08 | 3 | Endothelial Cells |
| <i>EFNB2</i>    | 0.82 | 0.00 | 0.00 | 0.36 | 0.06 | 3 | Endothelial Cells |
| <i>KCTD12</i>   | 0.82 | 0.00 | 0.00 | 0.57 | 0.20 | 3 | Endothelial Cells |
| <i>CTNNAL1</i>  | 0.82 | 0.00 | 0.00 | 0.51 | 0.16 | 3 | Endothelial Cells |
| <i>GBP4</i>     | 0.82 | 0.00 | 0.00 | 0.46 | 0.06 | 3 | Endothelial Cells |
| <i>S100A13</i>  | 0.81 | 0.00 | 0.00 | 0.75 | 0.36 | 3 | Endothelial Cells |
| <i>LEPROTL1</i> | 0.81 | 0.00 | 0.00 | 0.62 | 0.21 | 3 | Endothelial Cells |
| <i>KIAA1217</i> | 0.8  | 0.00 | 0.00 | 0.39 | 0.03 | 3 | Endothelial Cells |
| <i>SPTBN1</i>   | 0.8  | 0.00 | 0.00 | 0.76 | 0.39 | 3 | Endothelial Cells |
| <i>TCF4</i>     | 0.8  | 0.00 | 0.00 | 0.82 | 0.44 | 3 | Endothelial Cells |
| <i>RAB11A</i>   | 0.79 | 0.00 | 0.00 | 0.77 | 0.41 | 3 | Endothelial Cells |
| <i>NPDC1</i>    | 0.79 | 0.00 | 0.00 | 0.68 | 0.26 | 3 | Endothelial Cells |
| <i>IFITM3</i>   | 0.79 | 0.00 | 0.00 | 1.00 | 0.90 | 3 | Endothelial Cells |
| <i>IFITM2</i>   | 0.79 | 0.00 | 0.00 | 0.88 | 0.61 | 3 | Endothelial Cells |
| <i>KANK3</i>    | 0.79 | 0.00 | 0.00 | 0.50 | 0.11 | 3 | Endothelial Cells |
| <i>EGLN3</i>    | 0.78 | 0.00 | 0.00 | 0.40 | 0.05 | 3 | Endothelial Cells |
| <i>ADCY4</i>    | 0.78 | 0.00 | 0.00 | 0.43 | 0.06 | 3 | Endothelial Cells |
| <i>APOL3</i>    | 0.78 | 0.00 | 0.00 | 0.49 | 0.08 | 3 | Endothelial Cells |
| <i>SOX17</i>    | 0.78 | 0.00 | 0.00 | 0.37 | 0.03 | 3 | Endothelial Cells |
| <i>PRPSAP1</i>  | 0.78 | 0.00 | 0.00 | 0.52 | 0.15 | 3 | Endothelial Cells |
| <i>MAP3K11</i>  | 0.77 | 0.00 | 0.00 | 0.50 | 0.12 | 3 | Endothelial Cells |
| <i>AQP1</i>     | 0.77 | 0.00 | 0.00 | 0.59 | 0.17 | 3 | Endothelial Cells |
| <i>ENG</i>      | 0.77 | 0.00 | 0.00 | 0.65 | 0.26 | 3 | Endothelial Cells |
| <i>CXorf36</i>  | 0.77 | 0.00 | 0.00 | 0.40 | 0.05 | 3 | Endothelial Cells |
| <i>APP</i>      | 0.77 | 0.00 | 0.00 | 0.81 | 0.48 | 3 | Endothelial Cells |
| <i>CFLAR</i>    | 0.77 | 0.00 | 0.00 | 0.63 | 0.23 | 3 | Endothelial Cells |
| <i>CD200</i>    | 0.77 | 0.00 | 0.00 | 0.45 | 0.08 | 3 | Endothelial Cells |
| <i>LMO2</i>     | 0.76 | 0.00 | 0.00 | 0.42 | 0.06 | 3 | Endothelial Cells |

|                 |      |      |      |      |      |   |                   |
|-----------------|------|------|------|------|------|---|-------------------|
| <i>NOSTRIN</i>  | 0.75 | 0.00 | 0.00 | 0.37 | 0.03 | 3 | Endothelial Cells |
| <i>TEK</i>      | 0.75 | 0.00 | 0.00 | 0.39 | 0.03 | 3 | Endothelial Cells |
| <i>SERPINB6</i> | 0.74 | 0.00 | 0.00 | 0.69 | 0.39 | 3 | Endothelial Cells |
| <i>PCDH12</i>   | 0.74 | 0.00 | 0.00 | 0.42 | 0.06 | 3 | Endothelial Cells |
| <i>PROCR</i>    | 0.74 | 0.00 | 0.00 | 0.43 | 0.11 | 3 | Endothelial Cells |
| <i>RAPGEF5</i>  | 0.74 | 0.00 | 0.00 | 0.47 | 0.09 | 3 | Endothelial Cells |
| <i>ADGRF5</i>   | 0.74 | 0.00 | 0.00 | 0.52 | 0.14 | 3 | Endothelial Cells |
| <i>SCD</i>      | 0.74 | 0.00 | 0.00 | 0.27 | 0.03 | 3 | Endothelial Cells |
| <i>DTL</i>      | 0.73 | 0.00 | 0.00 | 0.30 | 0.01 | 3 | Endothelial Cells |
| <i>NPR3</i>     | 0.73 | 0.00 | 0.00 | 0.38 | 0.06 | 3 | Endothelial Cells |
| <i>ELK3</i>     | 0.73 | 0.00 | 0.00 | 0.48 | 0.12 | 3 | Endothelial Cells |
| <i>PSMB8</i>    | 0.73 | 0.00 | 0.00 | 0.61 | 0.22 | 3 | Endothelial Cells |
| <i>FDPS</i>     | 0.72 | 0.00 | 0.00 | 0.64 | 0.31 | 3 | Endothelial Cells |
| <i>PLAT</i>     | 0.72 | 0.00 | 0.00 | 0.30 | 0.13 | 3 | Endothelial Cells |
| <i>MGST2</i>    | 0.71 | 0.00 | 0.00 | 0.59 | 0.23 | 3 | Endothelial Cells |
| <i>ERG</i>      | 0.7  | 0.00 | 0.00 | 0.44 | 0.08 | 3 | Endothelial Cells |
| <i>ARHGEF15</i> | 0.7  | 0.00 | 0.00 | 0.37 | 0.04 | 3 | Endothelial Cells |
| <i>PODXL</i>    | 0.7  | 0.00 | 0.00 | 0.40 | 0.06 | 3 | Endothelial Cells |
| <i>MYCT1</i>    | 0.7  | 0.00 | 0.00 | 0.37 | 0.03 | 3 | Endothelial Cells |
| <i>PTPRB</i>    | 0.7  | 0.00 | 0.00 | 0.38 | 0.04 | 3 | Endothelial Cells |
| <i>EMP2</i>     | 0.7  | 0.00 | 0.00 | 0.78 | 0.46 | 3 | Endothelial Cells |
| <i>PDGFB</i>    | 0.7  | 0.00 | 0.00 | 0.35 | 0.03 | 3 | Endothelial Cells |
| <i>BMPR2</i>    | 0.69 | 0.00 | 0.00 | 0.53 | 0.19 | 3 | Endothelial Cells |
| <i>ITM2B</i>    | 0.69 | 0.00 | 0.00 | 0.97 | 0.88 | 3 | Endothelial Cells |
| <i>CARD16</i>   | 0.69 | 0.00 | 0.00 | 0.62 | 0.25 | 3 | Endothelial Cells |
| <i>C10orf54</i> | 0.69 | 0.00 | 0.00 | 0.52 | 0.17 | 3 | Endothelial Cells |
| <i>GPR146</i>   | 0.69 | 0.00 | 0.00 | 0.41 | 0.06 | 3 | Endothelial Cells |
| <i>IFI6</i>     | 0.69 | 0.00 | 0.00 | 0.55 | 0.23 | 3 | Endothelial Cells |
| <i>GIMAP1</i>   | 0.69 | 0.00 | 0.00 | 0.43 | 0.07 | 3 | Endothelial Cells |
| <i>MAOA</i>     | 0.69 | 0.00 | 0.00 | 0.35 | 0.05 | 3 | Endothelial Cells |
| <i>BRI3</i>     | 0.69 | 0.00 | 0.00 | 0.59 | 0.26 | 3 | Endothelial Cells |
| <i>TGFBR2</i>   | 0.69 | 0.00 | 0.00 | 0.52 | 0.16 | 3 | Endothelial Cells |
| <i>TFPI</i>     | 0.69 | 0.00 | 0.00 | 0.73 | 0.40 | 3 | Endothelial Cells |
| <i>CALM1</i>    | 0.69 | 0.00 | 0.00 | 0.91 | 0.72 | 3 | Endothelial Cells |
| <i>RASGRP3</i>  | 0.69 | 0.00 | 0.00 | 0.34 | 0.03 | 3 | Endothelial Cells |
| <i>RASIP1</i>   | 0.68 | 0.00 | 0.00 | 0.41 | 0.07 | 3 | Endothelial Cells |
| <i>HOXA5</i>    | 0.68 | 0.00 | 0.00 | 0.53 | 0.21 | 3 | Endothelial Cells |
| <i>UACA</i>     | 0.68 | 0.00 | 0.00 | 0.55 | 0.22 | 3 | Endothelial Cells |
| <i>ETS1</i>     | 0.68 | 0.00 | 0.00 | 0.45 | 0.12 | 3 | Endothelial Cells |
| <i>FCGRT</i>    | 0.68 | 0.00 | 0.00 | 0.83 | 0.54 | 3 | Endothelial Cells |
| <i>TMEM123</i>  | 0.68 | 0.00 | 0.00 | 0.65 | 0.35 | 3 | Endothelial Cells |
| <i>TSPAN15</i>  | 0.68 | 0.00 | 0.00 | 0.45 | 0.10 | 3 | Endothelial Cells |
| <i>TNFRSF4</i>  | 0.68 | 0.00 | 0.00 | 0.35 | 0.05 | 3 | Endothelial Cells |

|                 |      |      |      |      |      |   |                   |
|-----------------|------|------|------|------|------|---|-------------------|
| <i>WWTR1</i>    | 0.68 | 0.00 | 0.00 | 0.49 | 0.18 | 3 | Endothelial Cells |
| <i>HEY1</i>     | 0.67 | 0.00 | 0.00 | 0.30 | 0.02 | 3 | Endothelial Cells |
| <i>MEIS2</i>    | 0.67 | 0.00 | 0.00 | 0.39 | 0.09 | 3 | Endothelial Cells |
| <i>PRKCH</i>    | 0.67 | 0.00 | 0.00 | 0.41 | 0.06 | 3 | Endothelial Cells |
| <i>SPEF2</i>    | 0.67 | 0.00 | 0.00 | 0.29 | 0.03 | 3 | Endothelial Cells |
| <i>TLE4</i>     | 0.67 | 0.00 | 0.00 | 0.48 | 0.18 | 3 | Endothelial Cells |
| <i>TMEM204</i>  | 0.67 | 0.00 | 0.00 | 0.48 | 0.16 | 3 | Endothelial Cells |
| <i>PRMT1</i>    | 0.66 | 0.00 | 0.00 | 0.77 | 0.49 | 3 | Endothelial Cells |
| <i>CDC25B</i>   | 0.66 | 0.00 | 0.00 | 0.33 | 0.09 | 3 | Endothelial Cells |
| <i>ADGRL2</i>   | 0.66 | 0.00 | 0.00 | 0.47 | 0.12 | 3 | Endothelial Cells |
| <i>VAT1</i>     | 0.66 | 0.00 | 0.00 | 0.52 | 0.14 | 3 | Endothelial Cells |
| <i>C10orf10</i> | 0.66 | 0.00 | 0.00 | 0.43 | 0.13 | 3 | Endothelial Cells |
| <i>FOXP1</i>    | 0.66 | 0.00 | 0.00 | 0.67 | 0.37 | 3 | Endothelial Cells |
| <i>LAP3</i>     | 0.65 | 0.00 | 0.00 | 0.50 | 0.19 | 3 | Endothelial Cells |
| <i>VAMP3</i>    | 0.65 | 0.00 | 0.00 | 0.53 | 0.24 | 3 | Endothelial Cells |
| <i>S100A3</i>   | 0.65 | 0.00 | 0.00 | 0.32 | 0.09 | 3 | Endothelial Cells |
| <i>HHEX</i>     | 0.65 | 0.00 | 0.00 | 0.38 | 0.07 | 3 | Endothelial Cells |
| <i>HSPA1A</i>   | 0.65 | 0.00 | 0.00 | 0.86 | 0.62 | 3 | Endothelial Cells |
| <i>PIM3</i>     | 0.65 | 0.00 | 0.00 | 0.46 | 0.14 | 3 | Endothelial Cells |
| <i>STMN1</i>    | 0.65 | 0.00 | 0.00 | 0.78 | 0.50 | 3 | Endothelial Cells |
| <i>RAPGEF4</i>  | 0.64 | 0.00 | 0.00 | 0.33 | 0.03 | 3 | Endothelial Cells |
| <i>FRY</i>      | 0.64 | 0.00 | 0.00 | 0.47 | 0.12 | 3 | Endothelial Cells |
| <i>TPST2</i>    | 0.64 | 0.00 | 0.00 | 0.46 | 0.11 | 3 | Endothelial Cells |
| <i>SCARF1</i>   | 0.64 | 0.00 | 0.00 | 0.37 | 0.05 | 3 | Endothelial Cells |
| <i>MT-RNR1</i>  | 0.64 | 0.00 | 0.00 | 0.97 | 0.95 | 3 | Endothelial Cells |
| <i>QKI</i>      | 0.64 | 0.00 | 0.00 | 0.47 | 0.18 | 3 | Endothelial Cells |
| <i>MRI1</i>     | 0.63 | 0.00 | 0.00 | 0.37 | 0.09 | 3 | Endothelial Cells |
| <i>HLA-F</i>    | 0.63 | 0.00 | 0.00 | 0.44 | 0.10 | 3 | Endothelial Cells |
| <i>ADAM15</i>   | 0.63 | 0.00 | 0.00 | 0.32 | 0.09 | 3 | Endothelial Cells |
| <i>MMRN2</i>    | 0.63 | 0.00 | 0.00 | 0.39 | 0.06 | 3 | Endothelial Cells |
| <i>ANXA3</i>    | 0.63 | 0.00 | 0.00 | 0.43 | 0.09 | 3 | Endothelial Cells |
| <i>HSPA12B</i>  | 0.62 | 0.00 | 0.00 | 0.39 | 0.06 | 3 | Endothelial Cells |
| <i>MESDC1</i>   | 0.62 | 0.00 | 0.00 | 0.42 | 0.13 | 3 | Endothelial Cells |
| <i>TMEM2</i>    | 0.62 | 0.00 | 0.00 | 0.30 | 0.06 | 3 | Endothelial Cells |
| <i>TSPAN12</i>  | 0.62 | 0.00 | 0.00 | 0.46 | 0.12 | 3 | Endothelial Cells |
| <i>MLF1</i>     | 0.61 | 0.00 | 0.00 | 0.40 | 0.12 | 3 | Endothelial Cells |
| <i>DYNLL1</i>   | 0.61 | 0.00 | 0.00 | 0.92 | 0.77 | 3 | Endothelial Cells |
| <i>IFI16</i>    | 0.61 | 0.00 | 0.00 | 0.63 | 0.32 | 3 | Endothelial Cells |
| <i>DACH1</i>    | 0.61 | 0.00 | 0.00 | 0.34 | 0.05 | 3 | Endothelial Cells |
| <i>TBX3</i>     | 0.61 | 0.00 | 0.00 | 0.55 | 0.27 | 3 | Endothelial Cells |
| <i>KIAA0355</i> | 0.61 | 0.00 | 0.00 | 0.44 | 0.15 | 3 | Endothelial Cells |
| <i>FAM84A</i>   | 0.61 | 0.00 | 0.00 | 0.26 | 0.03 | 3 | Endothelial Cells |
| <i>FLT1</i>     | 0.61 | 0.00 | 0.00 | 0.35 | 0.05 | 3 | Endothelial Cells |

|                    |      |      |      |      |      |   |                   |
|--------------------|------|------|------|------|------|---|-------------------|
| <i>GIMAP6</i>      | 0.6  | 0.00 | 0.00 | 0.36 | 0.05 | 3 | Endothelial Cells |
| <i>DOCK9</i>       | 0.6  | 0.00 | 0.00 | 0.33 | 0.04 | 3 | Endothelial Cells |
| <i>C11orf31</i>    | 0.6  | 0.00 | 0.00 | 0.77 | 0.53 | 3 | Endothelial Cells |
| <i>KLF2</i>        | 0.6  | 0.00 | 0.00 | 0.42 | 0.15 | 3 | Endothelial Cells |
| <i>PRX</i>         | 0.6  | 0.00 | 0.00 | 0.39 | 0.06 | 3 | Endothelial Cells |
| <i>RHOC</i>        | 0.6  | 0.00 | 0.00 | 0.84 | 0.58 | 3 | Endothelial Cells |
| <i>ACTN4</i>       | 0.6  | 0.00 | 0.00 | 0.70 | 0.37 | 3 | Endothelial Cells |
| <i>AFAP1L1</i>     | 0.59 | 0.00 | 0.00 | 0.34 | 0.05 | 3 | Endothelial Cells |
| <i>MYO6</i>        | 0.59 | 0.00 | 0.00 | 0.40 | 0.11 | 3 | Endothelial Cells |
| <i>MYL12A</i>      | 0.58 | 0.00 | 0.00 | 0.91 | 0.73 | 3 | Endothelial Cells |
| <i>SEMA6A</i>      | 0.58 | 0.00 | 0.00 | 0.33 | 0.05 | 3 | Endothelial Cells |
| <i>SPHK1</i>       | 0.58 | 0.00 | 0.00 | 0.30 | 0.04 | 3 | Endothelial Cells |
| <i>bP-2189O9.2</i> | 0.58 | 0.00 | 0.00 | 0.31 | 0.04 | 3 | Endothelial Cells |
| <i>GATA2</i>       | 0.58 | 0.00 | 0.00 | 0.32 | 0.04 | 3 | Endothelial Cells |
| <i>TSPAN4</i>      | 0.57 | 0.00 | 0.00 | 0.59 | 0.28 | 3 | Endothelial Cells |
| <i>COL4A1</i>      | 0.57 | 0.00 | 0.00 | 0.84 | 0.50 | 3 | Endothelial Cells |
| <i>APOL1</i>       | 0.57 | 0.00 | 0.00 | 0.35 | 0.06 | 3 | Endothelial Cells |
| <i>FAM69B</i>      | 0.57 | 0.00 | 0.00 | 0.30 | 0.03 | 3 | Endothelial Cells |
| <i>NCKAP5</i>      | 0.57 | 0.00 | 0.00 | 0.29 | 0.05 | 3 | Endothelial Cells |
| <i>EFNB1</i>       | 0.57 | 0.00 | 0.00 | 0.38 | 0.10 | 3 | Endothelial Cells |
| <i>ECE1</i>        | 0.56 | 0.00 | 0.00 | 0.41 | 0.13 | 3 | Endothelial Cells |
| <i>PARVB</i>       | 0.56 | 0.00 | 0.00 | 0.42 | 0.12 | 3 | Endothelial Cells |
| <i>NAA38</i>       | 0.56 | 0.00 | 0.00 | 0.61 | 0.36 | 3 | Endothelial Cells |
| <i>TSPAN13</i>     | 0.56 | 0.00 | 0.00 | 0.41 | 0.11 | 3 | Endothelial Cells |
| <i>HDAC7</i>       | 0.55 | 0.00 | 0.00 | 0.42 | 0.14 | 3 | Endothelial Cells |
| <i>CFAP20</i>      | 0.55 | 0.00 | 0.00 | 0.52 | 0.23 | 3 | Endothelial Cells |
| <i>LUZP1</i>       | 0.55 | 0.00 | 0.00 | 0.45 | 0.15 | 3 | Endothelial Cells |
| <i>SVIP</i>        | 0.55 | 0.00 | 0.00 | 0.40 | 0.13 | 3 | Endothelial Cells |
| <i>TMEM255B</i>    | 0.55 | 0.00 | 0.00 | 0.30 | 0.03 | 3 | Endothelial Cells |
| <i>LYL1</i>        | 0.55 | 0.00 | 0.00 | 0.37 | 0.08 | 3 | Endothelial Cells |
| <i>PEA15</i>       | 0.55 | 0.00 | 0.00 | 0.53 | 0.24 | 3 | Endothelial Cells |
| <i>IFNGR1</i>      | 0.55 | 0.00 | 0.00 | 0.51 | 0.25 | 3 | Endothelial Cells |
| <i>S100A10</i>     | 0.55 | 0.00 | 0.00 | 0.94 | 0.62 | 3 | Endothelial Cells |
| <i>BTN3A2</i>      | 0.55 | 0.00 | 0.00 | 0.37 | 0.09 | 3 | Endothelial Cells |
| <i>TMEM140</i>     | 0.55 | 0.00 | 0.00 | 0.31 | 0.06 | 3 | Endothelial Cells |
| <i>CMTM3</i>       | 0.54 | 0.00 | 0.00 | 0.55 | 0.25 | 3 | Endothelial Cells |
| <i>SHE</i>         | 0.54 | 0.00 | 0.00 | 0.28 | 0.03 | 3 | Endothelial Cells |
| <i>LRRC32</i>      | 0.54 | 0.00 | 0.00 | 0.34 | 0.11 | 3 | Endothelial Cells |
| <i>ISG15</i>       | 0.54 | 0.00 | 0.00 | 0.53 | 0.24 | 3 | Endothelial Cells |
| <i>NRN1</i>        | 0.54 | 0.00 | 0.00 | 0.35 | 0.06 | 3 | Endothelial Cells |
| <i>PLXNC1</i>      | 0.53 | 0.00 | 0.00 | 0.28 | 0.03 | 3 | Endothelial Cells |
| <i>CLEC3B</i>      | 0.53 | 0.00 | 0.00 | 0.26 | 0.03 | 3 | Endothelial Cells |
| <i>HSPA1B</i>      | 0.53 | 0.00 | 0.00 | 0.67 | 0.35 | 3 | Endothelial Cells |

|                 |      |      |      |      |      |   |                   |
|-----------------|------|------|------|------|------|---|-------------------|
| <i>FAM101B</i>  | 0.53 | 0.00 | 0.00 | 0.26 | 0.04 | 3 | Endothelial Cells |
| <i>NUDT14</i>   | 0.53 | 0.00 | 0.00 | 0.32 | 0.07 | 3 | Endothelial Cells |
| <i>PON2</i>     | 0.53 | 0.00 | 0.00 | 0.48 | 0.22 | 3 | Endothelial Cells |
| <i>SNX3</i>     | 0.53 | 0.00 | 0.00 | 0.85 | 0.68 | 3 | Endothelial Cells |
| <i>MLLT4</i>    | 0.52 | 0.00 | 0.00 | 0.43 | 0.14 | 3 | Endothelial Cells |
| <i>IGF2BP2</i>  | 0.52 | 0.00 | 0.00 | 0.41 | 0.12 | 3 | Endothelial Cells |
| <i>APCDD1</i>   | 0.52 | 0.00 | 0.00 | 0.31 | 0.07 | 3 | Endothelial Cells |
| <i>PDE3B</i>    | 0.52 | 0.00 | 0.00 | 0.28 | 0.05 | 3 | Endothelial Cells |
| <i>ZEB1</i>     | 0.52 | 0.00 | 0.00 | 0.40 | 0.12 | 3 | Endothelial Cells |
| <i>STARD3</i>   | 0.52 | 0.00 | 0.00 | 0.34 | 0.10 | 3 | Endothelial Cells |
| <i>MAPK3</i>    | 0.52 | 0.00 | 0.00 | 0.41 | 0.14 | 3 | Endothelial Cells |
| <i>FXYD6</i>    | 0.52 | 0.00 | 0.00 | 0.65 | 0.39 | 3 | Endothelial Cells |
| <i>CASKIN2</i>  | 0.52 | 0.00 | 0.00 | 0.34 | 0.07 | 3 | Endothelial Cells |
| <i>POLR2L</i>   | 0.51 | 0.00 | 0.00 | 0.85 | 0.66 | 3 | Endothelial Cells |
| <i>PPP2R5A</i>  | 0.51 | 0.00 | 0.00 | 0.33 | 0.08 | 3 | Endothelial Cells |
| <i>KLF4</i>     | 0.51 | 0.00 | 0.00 | 0.38 | 0.14 | 3 | Endothelial Cells |
| <i>CASZ1</i>    | 0.51 | 0.00 | 0.00 | 0.28 | 0.04 | 3 | Endothelial Cells |
| <i>GUK1</i>     | 0.51 | 0.00 | 0.00 | 0.81 | 0.66 | 3 | Endothelial Cells |
| <i>PSME1</i>    | 0.51 | 0.00 | 0.00 | 0.78 | 0.58 | 3 | Endothelial Cells |
| <i>ATOX1</i>    | 0.51 | 0.00 | 0.00 | 0.61 | 0.38 | 3 | Endothelial Cells |
| <i>ABHD17A</i>  | 0.51 | 0.00 | 0.00 | 0.39 | 0.13 | 3 | Endothelial Cells |
| <i>STK4</i>     | 0.51 | 0.00 | 0.00 | 0.38 | 0.14 | 3 | Endothelial Cells |
| <i>SLC26A2</i>  | 0.51 | 0.00 | 0.00 | 0.26 | 0.06 | 3 | Endothelial Cells |
| <i>MAP4K2</i>   | 0.5  | 0.00 | 0.00 | 0.29 | 0.05 | 3 | Endothelial Cells |
| <i>SNRK</i>     | 0.5  | 0.00 | 0.00 | 0.35 | 0.11 | 3 | Endothelial Cells |
| <i>CDC37</i>    | 0.5  | 0.00 | 0.00 | 0.70 | 0.47 | 3 | Endothelial Cells |
| <i>SERPINH1</i> | 0.5  | 0.00 | 0.00 | 0.79 | 0.55 | 3 | Endothelial Cells |
| <i>PLEKHA1</i>  | 0.5  | 0.00 | 0.00 | 0.41 | 0.15 | 3 | Endothelial Cells |
| <i>PTPRM</i>    | 0.5  | 0.00 | 0.00 | 0.29 | 0.06 | 3 | Endothelial Cells |
| <i>XAF1</i>     | 0.5  | 0.00 | 0.00 | 0.33 | 0.07 | 3 | Endothelial Cells |
| <i>CCDC130</i>  | 0.5  | 0.00 | 0.00 | 0.34 | 0.11 | 3 | Endothelial Cells |
| <i>ITGA5</i>    | 0.5  | 0.00 | 0.00 | 0.36 | 0.11 | 3 | Endothelial Cells |
| <i>CD320</i>    | 0.5  | 0.00 | 0.00 | 0.37 | 0.13 | 3 | Endothelial Cells |
| <i>N4BP3</i>    | 0.5  | 0.00 | 0.00 | 0.27 | 0.02 | 3 | Endothelial Cells |
| <i>TSPAN18</i>  | 0.5  | 0.00 | 0.00 | 0.30 | 0.06 | 3 | Endothelial Cells |
| <i>GJA4</i>     | 0.5  | 0.00 | 0.00 | 0.32 | 0.14 | 3 | Endothelial Cells |
| <i>RBM17</i>    | 0.49 | 0.00 | 0.00 | 0.58 | 0.35 | 3 | Endothelial Cells |
| <i>FXYD5</i>    | 0.49 | 0.00 | 0.00 | 0.56 | 0.23 | 3 | Endothelial Cells |
| <i>DPYSL3</i>   | 0.49 | 0.00 | 0.00 | 0.39 | 0.13 | 3 | Endothelial Cells |
| <i>NEDD4L</i>   | 0.49 | 0.00 | 0.00 | 0.25 | 0.05 | 3 | Endothelial Cells |
| <i>YES1</i>     | 0.49 | 0.00 | 0.00 | 0.32 | 0.09 | 3 | Endothelial Cells |
| <i>HEG1</i>     | 0.49 | 0.00 | 0.00 | 0.41 | 0.11 | 3 | Endothelial Cells |
| <i>HPCAL1</i>   | 0.49 | 0.00 | 0.00 | 0.38 | 0.13 | 3 | Endothelial Cells |

|                 |      |      |      |      |      |   |                   |
|-----------------|------|------|------|------|------|---|-------------------|
| <i>HOMER3</i>   | 0.49 | 0.00 | 0.00 | 0.30 | 0.07 | 3 | Endothelial Cells |
| <i>GALNT18</i>  | 0.48 | 0.00 | 0.00 | 0.34 | 0.10 | 3 | Endothelial Cells |
| <i>COL4A2</i>   | 0.48 | 0.00 | 0.00 | 0.82 | 0.52 | 3 | Endothelial Cells |
| <i>NOTCH1</i>   | 0.48 | 0.00 | 0.00 | 0.28 | 0.06 | 3 | Endothelial Cells |
| <i>CDC42EP1</i> | 0.48 | 0.00 | 0.00 | 0.46 | 0.23 | 3 | Endothelial Cells |
| <i>OCIAD2</i>   | 0.48 | 0.00 | 0.00 | 0.38 | 0.12 | 3 | Endothelial Cells |
| <i>SLC44A2</i>  | 0.48 | 0.00 | 0.00 | 0.41 | 0.15 | 3 | Endothelial Cells |
| <i>APH1A</i>    | 0.48 | 0.00 | 0.00 | 0.53 | 0.30 | 3 | Endothelial Cells |
| <i>LRRFIP1</i>  | 0.48 | 0.00 | 0.00 | 0.52 | 0.25 | 3 | Endothelial Cells |
| <i>PSME2</i>    | 0.48 | 0.00 | 0.00 | 0.66 | 0.43 | 3 | Endothelial Cells |
| <i>HSPB8</i>    | 0.48 | 0.00 | 0.00 | 0.30 | 0.09 | 3 | Endothelial Cells |
| <i>TJP1</i>     | 0.48 | 0.00 | 0.00 | 0.54 | 0.26 | 3 | Endothelial Cells |
| <i>UBE2L6</i>   | 0.48 | 0.00 | 0.00 | 0.48 | 0.22 | 3 | Endothelial Cells |
| <i>ADGRL3</i>   | 0.47 | 0.00 | 0.00 | 0.28 | 0.05 | 3 | Endothelial Cells |
| <i>MEF2A</i>    | 0.47 | 0.00 | 0.00 | 0.39 | 0.15 | 3 | Endothelial Cells |
| <i>NEDD9</i>    | 0.47 | 0.00 | 0.00 | 0.38 | 0.12 | 3 | Endothelial Cells |
| <i>DHRS3</i>    | 0.47 | 0.00 | 0.00 | 0.34 | 0.09 | 3 | Endothelial Cells |
| <i>SHROOM4</i>  | 0.47 | 0.00 | 0.00 | 0.27 | 0.04 | 3 | Endothelial Cells |
| <i>CD40</i>     | 0.47 | 0.00 | 0.00 | 0.32 | 0.08 | 3 | Endothelial Cells |
| <i>JUP</i>      | 0.47 | 0.00 | 0.00 | 0.41 | 0.14 | 3 | Endothelial Cells |
| <i>PAK4</i>     | 0.47 | 0.00 | 0.00 | 0.32 | 0.08 | 3 | Endothelial Cells |
| <i>TSC22D1</i>  | 0.46 | 0.00 | 0.00 | 0.79 | 0.59 | 3 | Endothelial Cells |
| <i>CPNE2</i>    | 0.46 | 0.00 | 0.00 | 0.28 | 0.07 | 3 | Endothelial Cells |
| <i>NECAP2</i>   | 0.46 | 0.00 | 0.00 | 0.45 | 0.20 | 3 | Endothelial Cells |
| <i>RGL2</i>     | 0.46 | 0.00 | 0.00 | 0.40 | 0.17 | 3 | Endothelial Cells |
| <i>DGKH</i>     | 0.46 | 0.00 | 0.00 | 0.30 | 0.07 | 3 | Endothelial Cells |
| <i>SASH1</i>    | 0.46 | 0.00 | 0.00 | 0.40 | 0.12 | 3 | Endothelial Cells |
| <i>CTNNB1</i>   | 0.46 | 0.00 | 0.00 | 0.55 | 0.36 | 3 | Endothelial Cells |
| <i>TSPAN5</i>   | 0.46 | 0.00 | 0.00 | 0.26 | 0.04 | 3 | Endothelial Cells |
| <i>PTTG1IP</i>  | 0.46 | 0.00 | 0.00 | 0.54 | 0.31 | 3 | Endothelial Cells |
| <i>SCHIP1.1</i> | 0.46 | 0.00 | 0.00 | 0.31 | 0.09 | 3 | Endothelial Cells |
| <i>SH2D3C</i>   | 0.46 | 0.00 | 0.00 | 0.35 | 0.09 | 3 | Endothelial Cells |
| <i>CLIC1</i>    | 0.46 | 0.00 | 0.00 | 0.83 | 0.62 | 3 | Endothelial Cells |
| <i>SYNGR2</i>   | 0.45 | 0.00 | 0.00 | 0.49 | 0.25 | 3 | Endothelial Cells |
| <i>DOCK6</i>    | 0.45 | 0.00 | 0.00 | 0.35 | 0.13 | 3 | Endothelial Cells |
| <i>PHACTR2</i>  | 0.45 | 0.00 | 0.00 | 0.48 | 0.24 | 3 | Endothelial Cells |
| <i>AHR</i>      | 0.45 | 0.00 | 0.00 | 0.31 | 0.10 | 3 | Endothelial Cells |
| <i>ELK4</i>     | 0.45 | 0.00 | 0.00 | 0.33 | 0.11 | 3 | Endothelial Cells |
| <i>HSPG2</i>    | 0.44 | 0.00 | 0.00 | 0.44 | 0.17 | 3 | Endothelial Cells |
| <i>LAMTOR2</i>  | 0.44 | 0.00 | 0.00 | 0.48 | 0.26 | 3 | Endothelial Cells |
| <i>XIST</i>     | 0.44 | 0.00 | 0.00 | 0.84 | 0.69 | 3 | Endothelial Cells |
| <i>LPAR6</i>    | 0.44 | 0.00 | 0.00 | 0.32 | 0.11 | 3 | Endothelial Cells |
| <i>ARGLU1</i>   | 0.43 | 0.00 | 0.00 | 0.63 | 0.45 | 3 | Endothelial Cells |

|                     |      |      |      |      |      |   |                   |
|---------------------|------|------|------|------|------|---|-------------------|
| <i>SLFN5</i>        | 0.43 | 0.00 | 0.00 | 0.29 | 0.07 | 3 | Endothelial Cells |
| <i>SERPINB9</i>     | 0.43 | 0.00 | 0.00 | 0.27 | 0.08 | 3 | Endothelial Cells |
| <i>YWHAE</i>        | 0.43 | 0.00 | 0.00 | 0.76 | 0.62 | 3 | Endothelial Cells |
| <i>NRP1</i>         | 0.43 | 0.00 | 0.00 | 0.43 | 0.18 | 3 | Endothelial Cells |
| <i>EPHB4</i>        | 0.43 | 0.00 | 0.00 | 0.28 | 0.06 | 3 | Endothelial Cells |
| <i>OCLN</i>         | 0.43 | 0.00 | 0.00 | 0.27 | 0.05 | 3 | Endothelial Cells |
| <i>TAX1BP1</i>      | 0.43 | 0.00 | 0.00 | 0.49 | 0.32 | 3 | Endothelial Cells |
| <i>LSR</i>          | 0.43 | 0.00 | 0.00 | 0.30 | 0.08 | 3 | Endothelial Cells |
| <i>SPTAN1</i>       | 0.42 | 0.00 | 0.00 | 0.44 | 0.20 | 3 | Endothelial Cells |
| <i>GLUL</i>         | 0.42 | 0.00 | 0.00 | 0.65 | 0.40 | 3 | Endothelial Cells |
| <i>RAC1</i>         | 0.42 | 0.00 | 0.00 | 0.90 | 0.80 | 3 | Endothelial Cells |
| <i>SMAGP</i>        | 0.42 | 0.00 | 0.00 | 0.25 | 0.06 | 3 | Endothelial Cells |
| <i>GPX1</i>         | 0.42 | 0.00 | 0.00 | 0.73 | 0.51 | 3 | Endothelial Cells |
| <i>FRYL</i>         | 0.42 | 0.00 | 0.00 | 0.27 | 0.09 | 3 | Endothelial Cells |
| <i>IRF1</i>         | 0.42 | 0.00 | 0.00 | 0.39 | 0.18 | 3 | Endothelial Cells |
| <i>TSPAN14</i>      | 0.42 | 0.00 | 0.00 | 0.33 | 0.12 | 3 | Endothelial Cells |
| <i>DUSP1</i>        | 0.42 | 0.00 | 0.00 | 0.61 | 0.39 | 3 | Endothelial Cells |
| <i>RALGDS</i>       | 0.42 | 0.00 | 0.00 | 0.26 | 0.06 | 3 | Endothelial Cells |
| <i>MESDC2</i>       | 0.42 | 0.00 | 0.00 | 0.48 | 0.25 | 3 | Endothelial Cells |
| <i>C10orf11</i>     | 0.42 | 0.00 | 0.00 | 0.26 | 0.06 | 3 | Endothelial Cells |
| <i>PSMB10</i>       | 0.42 | 0.00 | 0.00 | 0.45 | 0.24 | 3 | Endothelial Cells |
| <i>IFIT3</i>        | 0.42 | 0.00 | 0.00 | 0.27 | 0.08 | 3 | Endothelial Cells |
| <i>AP1S2</i>        | 0.42 | 0.00 | 0.00 | 0.42 | 0.22 | 3 | Endothelial Cells |
| <i>FYN</i>          | 0.42 | 0.00 | 0.00 | 0.35 | 0.11 | 3 | Endothelial Cells |
| <i>FAM65A</i>       | 0.42 | 0.00 | 0.00 | 0.28 | 0.07 | 3 | Endothelial Cells |
| <i>PREX1</i>        | 0.42 | 0.00 | 0.00 | 0.28 | 0.06 | 3 | Endothelial Cells |
| <i>MFNG</i>         | 0.41 | 0.00 | 0.00 | 0.25 | 0.05 | 3 | Endothelial Cells |
| <i>ADD3</i>         | 0.41 | 0.00 | 0.00 | 0.45 | 0.21 | 3 | Endothelial Cells |
| <i>FAM89A</i>       | 0.41 | 0.00 | 0.00 | 0.26 | 0.04 | 3 | Endothelial Cells |
| <i>SLC12A2</i>      | 0.41 | 0.00 | 0.00 | 0.31 | 0.10 | 3 | Endothelial Cells |
| <i>RP3-449O17.1</i> | 0.41 | 0.00 | 0.00 | 0.26 | 0.06 | 3 | Endothelial Cells |
| <i>GSDMD</i>        | 0.41 | 0.00 | 0.00 | 0.39 | 0.17 | 3 | Endothelial Cells |
| <i>ELMO1</i>        | 0.41 | 0.00 | 0.00 | 0.26 | 0.08 | 3 | Endothelial Cells |
| <i>ARHGEF3</i>      | 0.41 | 0.00 | 0.00 | 0.27 | 0.06 | 3 | Endothelial Cells |
| <i>PTPRN2</i>       | 0.41 | 0.00 | 0.00 | 0.26 | 0.05 | 3 | Endothelial Cells |
| <i>PXN</i>          | 0.41 | 0.00 | 0.00 | 0.29 | 0.08 | 3 | Endothelial Cells |
| <i>GBP1</i>         | 0.41 | 0.00 | 0.00 | 0.26 | 0.11 | 3 | Endothelial Cells |
| <i>PLXND1</i>       | 0.41 | 0.00 | 0.00 | 0.35 | 0.11 | 3 | Endothelial Cells |
| <i>ZNHIT1</i>       | 0.41 | 0.00 | 0.00 | 0.61 | 0.43 | 3 | Endothelial Cells |
| <i>SIGIRR</i>       | 0.4  | 0.00 | 0.00 | 0.37 | 0.15 | 3 | Endothelial Cells |
| <i>DAD1</i>         | 0.4  | 0.00 | 0.00 | 0.78 | 0.63 | 3 | Endothelial Cells |
| <i>TMSB4X</i>       | 0.4  | 0.00 | 0.00 | 1.00 | 1.00 | 3 | Endothelial Cells |

|                      |      |      |      |      |      |   |                   |
|----------------------|------|------|------|------|------|---|-------------------|
| <i>REEP3</i>         | 0.4  | 0.00 | 0.00 | 0.33 | 0.14 | 3 | Endothelial Cells |
| <i>FNBP1L</i>        | 0.4  | 0.00 | 0.00 | 0.27 | 0.08 | 3 | Endothelial Cells |
| <i>RPS6KA2</i>       | 0.4  | 0.00 | 0.00 | 0.30 | 0.09 | 3 | Endothelial Cells |
| <i>STX12</i>         | 0.4  | 0.00 | 0.00 | 0.39 | 0.19 | 3 | Endothelial Cells |
| <i>HMBOX1</i>        | 0.4  | 0.00 | 0.00 | 0.32 | 0.13 | 3 | Endothelial Cells |
| <i>NECTIN2</i>       | 0.4  | 0.00 | 0.00 | 0.42 | 0.22 | 3 | Endothelial Cells |
| <i>CALR</i>          | 0.4  | 0.00 | 0.00 | 0.76 | 0.56 | 3 | Endothelial Cells |
| <i>CDKN1C</i>        | 0.39 | 0.00 | 0.00 | 0.37 | 0.19 | 3 | Endothelial Cells |
| <i>TRIM56</i>        | 0.39 | 0.00 | 0.00 | 0.39 | 0.20 | 3 | Endothelial Cells |
| <i>DGKZ</i>          | 0.39 | 0.00 | 0.00 | 0.33 | 0.11 | 3 | Endothelial Cells |
| <i>PPM1F</i>         | 0.39 | 0.00 | 0.00 | 0.25 | 0.06 | 3 | Endothelial Cells |
| <i>FIS1</i>          | 0.39 | 0.00 | 0.00 | 0.67 | 0.49 | 3 | Endothelial Cells |
| <i>LGALS9</i>        | 0.39 | 0.00 | 0.00 | 0.29 | 0.08 | 3 | Endothelial Cells |
| <i>AAMDC</i>         | 0.39 | 0.00 | 0.00 | 0.44 | 0.25 | 3 | Endothelial Cells |
| <i>TXNIP</i>         | 0.39 | 0.00 | 0.00 | 0.86 | 0.66 | 3 | Endothelial Cells |
| <i>TNFRSF14</i>      | 0.39 | 0.00 | 0.00 | 0.34 | 0.10 | 3 | Endothelial Cells |
| <i>RGS12</i>         | 0.39 | 0.00 | 0.00 | 0.30 | 0.10 | 3 | Endothelial Cells |
| <i>TNFAIP1</i>       | 0.39 | 0.00 | 0.00 | 0.25 | 0.08 | 3 | Endothelial Cells |
| <i>UTRN</i>          | 0.39 | 0.00 | 0.00 | 0.35 | 0.17 | 3 | Endothelial Cells |
| <i>HERPUD1</i>       | 0.39 | 0.00 | 0.00 | 0.59 | 0.40 | 3 | Endothelial Cells |
| <i>DDX17</i>         | 0.39 | 0.00 | 0.00 | 0.59 | 0.43 | 3 | Endothelial Cells |
| <i>CHST12</i>        | 0.39 | 0.00 | 0.00 | 0.45 | 0.22 | 3 | Endothelial Cells |
| <i>TMEM219</i>       | 0.39 | 0.00 | 0.00 | 0.50 | 0.30 | 3 | Endothelial Cells |
| <i>NDUFA8</i>        | 0.38 | 0.00 | 0.00 | 0.44 | 0.25 | 3 | Endothelial Cells |
| <i>RP11-467L13.5</i> | 0.38 | 0.00 | 0.00 | 0.34 | 0.18 | 3 | Endothelial Cells |
| <i>KTN1</i>          | 0.38 | 0.00 | 0.00 | 0.71 | 0.54 | 3 | Endothelial Cells |
| <i>NTHL1</i>         | 0.38 | 0.00 | 0.00 | 0.31 | 0.13 | 3 | Endothelial Cells |
| <i>PHACTR4</i>       | 0.38 | 0.00 | 0.00 | 0.31 | 0.13 | 3 | Endothelial Cells |
| <i>PPP3CA</i>        | 0.38 | 0.00 | 0.00 | 0.37 | 0.17 | 3 | Endothelial Cells |
| <i>TMEM179B</i>      | 0.38 | 0.00 | 0.00 | 0.46 | 0.26 | 3 | Endothelial Cells |
| <i>CFDP1</i>         | 0.38 | 0.00 | 0.00 | 0.57 | 0.42 | 3 | Endothelial Cells |
| <i>SERINC3</i>       | 0.37 | 0.00 | 0.00 | 0.42 | 0.23 | 3 | Endothelial Cells |
| <i>ERBIN</i>         | 0.37 | 0.00 | 0.00 | 0.31 | 0.11 | 3 | Endothelial Cells |
| <i>IFI35</i>         | 0.37 | 0.00 | 0.00 | 0.32 | 0.12 | 3 | Endothelial Cells |
| <i>COX17</i>         | 0.37 | 0.00 | 0.00 | 0.52 | 0.33 | 3 | Endothelial Cells |
| <i>NFIB</i>          | 0.37 | 0.00 | 0.00 | 0.69 | 0.48 | 3 | Endothelial Cells |
| <i>RAB5C</i>         | 0.37 | 0.00 | 0.00 | 0.60 | 0.43 | 3 | Endothelial Cells |
| <i>BAZ2B</i>         | 0.37 | 0.00 | 0.00 | 0.39 | 0.21 | 3 | Endothelial Cells |
| <i>CSTB</i>          | 0.37 | 0.00 | 0.00 | 0.68 | 0.47 | 3 | Endothelial Cells |
| <i>EPN2</i>          | 0.37 | 0.00 | 0.00 | 0.29 | 0.11 | 3 | Endothelial Cells |
| <i>TSPAN9</i>        | 0.36 | 0.00 | 0.00 | 0.26 | 0.09 | 3 | Endothelial Cells |
| <i>SKAP2</i>         | 0.36 | 0.00 | 0.00 | 0.41 | 0.24 | 3 | Endothelial Cells |

|                 |      |      |      |      |      |   |                   |
|-----------------|------|------|------|------|------|---|-------------------|
| <i>HLX</i>      | 0.36 | 0.00 | 0.00 | 0.30 | 0.11 | 3 | Endothelial Cells |
| <i>NKTR</i>     | 0.36 | 0.00 | 0.00 | 0.56 | 0.38 | 3 | Endothelial Cells |
| <i>NOP10</i>    | 0.36 | 0.00 | 0.00 | 0.66 | 0.46 | 3 | Endothelial Cells |
| <i>NDUFA3</i>   | 0.36 | 0.00 | 0.00 | 0.64 | 0.48 | 3 | Endothelial Cells |
| <i>ARHGEF12</i> | 0.36 | 0.00 | 0.00 | 0.46 | 0.23 | 3 | Endothelial Cells |
| <i>DCAF7</i>    | 0.36 | 0.00 | 0.00 | 0.39 | 0.21 | 3 | Endothelial Cells |
| <i>SLCO2A1</i>  | 0.36 | 0.00 | 0.00 | 0.36 | 0.08 | 3 | Endothelial Cells |
| <i>CYB561</i>   | 0.36 | 0.00 | 0.00 | 0.25 | 0.05 | 3 | Endothelial Cells |
| <i>ATP1B3</i>   | 0.36 | 0.00 | 0.00 | 0.49 | 0.29 | 3 | Endothelial Cells |
| <i>PAPSS2</i>   | 0.35 | 0.00 | 0.00 | 0.27 | 0.09 | 3 | Endothelial Cells |
| <i>ARRB1</i>    | 0.35 | 0.00 | 0.00 | 0.26 | 0.07 | 3 | Endothelial Cells |
| <i>SARAF</i>    | 0.35 | 0.00 | 0.00 | 0.73 | 0.63 | 3 | Endothelial Cells |
| <i>RNF7</i>     | 0.35 | 0.00 | 0.00 | 0.58 | 0.40 | 3 | Endothelial Cells |
| <i>SOX4</i>     | 0.35 | 0.00 | 0.00 | 0.83 | 0.75 | 3 | Endothelial Cells |
| <i>DNAJA1</i>   | 0.35 | 0.00 | 0.00 | 0.64 | 0.47 | 3 | Endothelial Cells |
| <i>TMEM176B</i> | 0.35 | 0.00 | 0.00 | 0.27 | 0.17 | 3 | Endothelial Cells |
| <i>ARL2</i>     | 0.35 | 0.00 | 0.00 | 0.52 | 0.33 | 3 | Endothelial Cells |
| <i>TPM3</i>     | 0.35 | 0.00 | 0.00 | 0.55 | 0.28 | 3 | Endothelial Cells |
| <i>MLLT6</i>    | 0.35 | 0.00 | 0.00 | 0.26 | 0.09 | 3 | Endothelial Cells |
| <i>HIPK2</i>    | 0.35 | 0.00 | 0.00 | 0.26 | 0.10 | 3 | Endothelial Cells |
| <i>OPTN</i>     | 0.35 | 0.00 | 0.00 | 0.37 | 0.18 | 3 | Endothelial Cells |
| <i>C9orf16</i>  | 0.35 | 0.00 | 0.00 | 0.47 | 0.28 | 3 | Endothelial Cells |
| <i>JAM3</i>     | 0.35 | 0.00 | 0.00 | 0.26 | 0.11 | 3 | Endothelial Cells |
| <i>PTMA</i>     | 0.35 | 0.00 | 0.00 | 1.00 | 1.00 | 3 | Endothelial Cells |
| <i>SRGAP2B</i>  | 0.35 | 0.00 | 0.00 | 0.30 | 0.12 | 3 | Endothelial Cells |
| <i>FRMD4A</i>   | 0.35 | 0.00 | 0.00 | 0.28 | 0.12 | 3 | Endothelial Cells |
| <i>S1PR1</i>    | 0.35 | 0.00 | 0.00 | 0.32 | 0.12 | 3 | Endothelial Cells |
| <i>IER2</i>     | 0.34 | 0.00 | 0.00 | 0.65 | 0.44 | 3 | Endothelial Cells |
| <i>TAPBP</i>    | 0.34 | 0.00 | 0.00 | 0.41 | 0.24 | 3 | Endothelial Cells |
| <i>TAP1</i>     | 0.34 | 0.00 | 0.00 | 0.29 | 0.11 | 3 | Endothelial Cells |
| <i>STAT1</i>    | 0.34 | 0.00 | 0.00 | 0.26 | 0.11 | 3 | Endothelial Cells |
| <i>PTPN12</i>   | 0.34 | 0.00 | 0.00 | 0.30 | 0.13 | 3 | Endothelial Cells |
| <i>MYL12B</i>   | 0.34 | 0.00 | 0.00 | 0.85 | 0.77 | 3 | Endothelial Cells |
| <i>TTC28</i>    | 0.34 | 0.00 | 0.00 | 0.28 | 0.12 | 3 | Endothelial Cells |
| <i>MAPRE2</i>   | 0.34 | 0.00 | 0.00 | 0.28 | 0.12 | 3 | Endothelial Cells |
| <i>CRIP2</i>    | 0.34 | 0.00 | 0.00 | 0.84 | 0.64 | 3 | Endothelial Cells |
| <i>SNHG7</i>    | 0.34 | 0.00 | 0.00 | 0.57 | 0.42 | 3 | Endothelial Cells |
| <i>NUMB</i>     | 0.34 | 0.00 | 0.00 | 0.36 | 0.18 | 3 | Endothelial Cells |
| <i>EBPL</i>     | 0.34 | 0.00 | 0.00 | 0.41 | 0.21 | 3 | Endothelial Cells |
| <i>SDCBP</i>    | 0.34 | 0.00 | 0.00 | 0.69 | 0.51 | 3 | Endothelial Cells |
| <i>ZNF503</i>   | 0.34 | 0.00 | 0.00 | 0.48 | 0.33 | 3 | Endothelial Cells |
| <i>TAX1BP3</i>  | 0.34 | 0.00 | 0.00 | 0.53 | 0.35 | 3 | Endothelial Cells |

|                     |      |      |      |      |      |   |                   |
|---------------------|------|------|------|------|------|---|-------------------|
| <i>RP11-693N9.2</i> | 0.34 | 0.00 | 0.00 | 0.27 | 0.15 | 3 | Endothelial Cells |
| <i>MRPL17</i>       | 0.34 | 0.00 | 0.00 | 0.30 | 0.13 | 3 | Endothelial Cells |
| <i>TMBIM6</i>       | 0.33 | 0.00 | 0.00 | 0.79 | 0.66 | 3 | Endothelial Cells |
| <i>SDF2L1</i>       | 0.33 | 0.00 | 0.00 | 0.38 | 0.21 | 3 | Endothelial Cells |
| <i>CD59</i>         | 0.33 | 0.00 | 0.00 | 0.69 | 0.60 | 3 | Endothelial Cells |
| <i>LINC01420</i>    | 0.33 | 0.00 | 0.00 | 0.47 | 0.33 | 3 | Endothelial Cells |
| <i>TNIP1</i>        | 0.33 | 0.00 | 0.00 | 0.36 | 0.18 | 3 | Endothelial Cells |
| <i>CCDC186</i>      | 0.33 | 0.00 | 0.00 | 0.28 | 0.11 | 3 | Endothelial Cells |
| <i>YWHAB</i>        | 0.33 | 0.00 | 0.00 | 0.72 | 0.57 | 3 | Endothelial Cells |
| <i>MAGEH1</i>       | 0.33 | 0.00 | 0.00 | 0.39 | 0.26 | 3 | Endothelial Cells |
| <i>TRIOBP</i>       | 0.33 | 0.00 | 0.00 | 0.36 | 0.18 | 3 | Endothelial Cells |
| <i>HIF3A</i>        | 0.33 | 0.00 | 0.00 | 0.30 | 0.12 | 3 | Endothelial Cells |
| <i>IMP3</i>         | 0.32 | 0.00 | 0.00 | 0.37 | 0.22 | 3 | Endothelial Cells |
| <i>S100A6</i>       | 0.32 | 0.00 | 0.00 | 0.90 | 0.84 | 3 | Endothelial Cells |
| <i>ATP5E</i>        | 0.32 | 0.00 | 0.00 | 0.94 | 0.87 | 3 | Endothelial Cells |
| <i>TAF11</i>        | 0.32 | 0.00 | 0.00 | 0.36 | 0.19 | 3 | Endothelial Cells |
| <i>PSMB3</i>        | 0.32 | 0.00 | 0.00 | 0.67 | 0.52 | 3 | Endothelial Cells |
| <i>JUN</i>          | 0.32 | 0.00 | 0.00 | 0.78 | 0.67 | 3 | Endothelial Cells |
| <i>RRAS</i>         | 0.32 | 0.00 | 0.00 | 0.30 | 0.14 | 3 | Endothelial Cells |
| <i>RHOA</i>         | 0.32 | 0.00 | 0.00 | 0.79 | 0.69 | 3 | Endothelial Cells |
| <i>PPP2R2A</i>      | 0.32 | 0.00 | 0.00 | 0.33 | 0.18 | 3 | Endothelial Cells |
| <i>PSMA7</i>        | 0.32 | 0.00 | 0.00 | 0.83 | 0.70 | 3 | Endothelial Cells |
| <i>SREK1IP1</i>     | 0.32 | 0.00 | 0.00 | 0.41 | 0.25 | 3 | Endothelial Cells |
| <i>KRTCAP2</i>      | 0.32 | 0.00 | 0.00 | 0.68 | 0.53 | 3 | Endothelial Cells |
| <i>ADAR</i>         | 0.32 | 0.00 | 0.00 | 0.41 | 0.22 | 3 | Endothelial Cells |
| <i>FAM43A</i>       | 0.32 | 0.00 | 0.00 | 0.29 | 0.13 | 3 | Endothelial Cells |
| <i>PLSCR1</i>       | 0.31 | 0.00 | 0.00 | 0.31 | 0.16 | 3 | Endothelial Cells |
| <i>SIPA1L2</i>      | 0.31 | 0.00 | 0.00 | 0.27 | 0.10 | 3 | Endothelial Cells |
| <i>RPIA</i>         | 0.31 | 0.00 | 0.00 | 0.26 | 0.12 | 3 | Endothelial Cells |
| <i>TMEM50A</i>      | 0.31 | 0.00 | 0.00 | 0.57 | 0.41 | 3 | Endothelial Cells |
| <i>PARP14</i>       | 0.31 | 0.00 | 0.00 | 0.27 | 0.09 | 3 | Endothelial Cells |
| <i>PURA</i>         | 0.31 | 0.00 | 0.00 | 0.35 | 0.18 | 3 | Endothelial Cells |
| <i>GUSBP3</i>       | 0.3  | 0.00 | 0.00 | 0.32 | 0.13 | 3 | Endothelial Cells |
| <i>SRGAP2C</i>      | 0.3  | 0.00 | 0.00 | 0.28 | 0.12 | 3 | Endothelial Cells |
| <i>CAPZA2</i>       | 0.3  | 0.00 | 0.00 | 0.66 | 0.50 | 3 | Endothelial Cells |
| <i>ZNF22</i>        | 0.3  | 0.00 | 0.00 | 0.49 | 0.31 | 3 | Endothelial Cells |
| <i>GNB1</i>         | 0.3  | 0.00 | 0.00 | 0.41 | 0.27 | 3 | Endothelial Cells |
| <i>TMEM109</i>      | 0.3  | 0.00 | 0.00 | 0.48 | 0.31 | 3 | Endothelial Cells |
| <i>MAPKAPK5-AS1</i> | 0.3  | 0.00 | 0.00 | 0.27 | 0.11 | 3 | Endothelial Cells |
| <i>MSN</i>          | 0.3  | 0.00 | 0.00 | 0.62 | 0.45 | 3 | Endothelial Cells |
| <i>SHISA5</i>       | 0.3  | 0.00 | 0.00 | 0.40 | 0.25 | 3 | Endothelial Cells |
| <i>CD9</i>          | 0.3  | 0.00 | 0.00 | 0.63 | 0.44 | 3 | Endothelial Cells |

|                  |      |      |      |      |      |   |                   |
|------------------|------|------|------|------|------|---|-------------------|
| <i>STOM</i>      | 0.3  | 0.00 | 0.00 | 0.63 | 0.42 | 3 | Endothelial Cells |
| <i>TJP2</i>      | 0.3  | 0.00 | 0.00 | 0.26 | 0.09 | 3 | Endothelial Cells |
| <i>MARCKS</i>    | 0.3  | 0.00 | 0.00 | 0.66 | 0.51 | 3 | Endothelial Cells |
| <i>MT-RNR2</i>   | 0.29 | 0.00 | 0.00 | 1.00 | 1.00 | 3 | Endothelial Cells |
| <i>WSB1</i>      | 0.29 | 0.00 | 0.00 | 0.80 | 0.65 | 3 | Endothelial Cells |
| <i>PFDN1</i>     | 0.29 | 0.00 | 0.00 | 0.47 | 0.30 | 3 | Endothelial Cells |
| <i>PSME2P2</i>   | 0.29 | 0.00 | 0.00 | 0.35 | 0.20 | 3 | Endothelial Cells |
| <i>SLC3A2</i>    | 0.29 | 0.00 | 0.00 | 0.37 | 0.22 | 3 | Endothelial Cells |
| <i>TPRKB</i>     | 0.29 | 0.00 | 0.00 | 0.34 | 0.20 | 3 | Endothelial Cells |
| <i>HMGB1</i>     | 0.29 | 0.00 | 0.00 | 0.96 | 0.92 | 3 | Endothelial Cells |
| <i>PTBP1</i>     | 0.29 | 0.00 | 0.00 | 0.42 | 0.26 | 3 | Endothelial Cells |
| <i>SERPINB1</i>  | 0.29 | 0.00 | 0.00 | 0.29 | 0.19 | 3 | Endothelial Cells |
| <i>RYBP</i>      | 0.29 | 0.00 | 0.00 | 0.26 | 0.11 | 3 | Endothelial Cells |
| <i>PDCD6IP</i>   | 0.29 | 0.00 | 0.00 | 0.33 | 0.18 | 3 | Endothelial Cells |
| <i>ANP32A</i>    | 0.29 | 0.00 | 0.00 | 0.44 | 0.29 | 3 | Endothelial Cells |
| <i>CFL1</i>      | 0.29 | 0.00 | 0.00 | 0.96 | 0.90 | 3 | Endothelial Cells |
| <i>SOCS3</i>     | 0.29 | 0.00 | 0.00 | 0.29 | 0.18 | 3 | Endothelial Cells |
| <i>FOXN3</i>     | 0.29 | 0.00 | 0.00 | 0.37 | 0.21 | 3 | Endothelial Cells |
| <i>RTN4</i>      | 0.28 | 0.00 | 0.00 | 0.75 | 0.62 | 3 | Endothelial Cells |
| <i>PSMB2</i>     | 0.28 | 0.00 | 0.00 | 0.52 | 0.37 | 3 | Endothelial Cells |
| <i>ALDH2</i>     | 0.28 | 0.00 | 0.00 | 0.47 | 0.33 | 3 | Endothelial Cells |
| <i>TMEM9B</i>    | 0.28 | 0.00 | 0.00 | 0.32 | 0.17 | 3 | Endothelial Cells |
| <i>DYNC1LI2</i>  | 0.28 | 0.00 | 0.00 | 0.41 | 0.26 | 3 | Endothelial Cells |
| <i>LAPTM4A</i>   | 0.28 | 0.00 | 0.00 | 0.91 | 0.84 | 3 | Endothelial Cells |
| <i>GABARAPL1</i> | 0.28 | 0.00 | 0.00 | 0.30 | 0.14 | 3 | Endothelial Cells |
| <i>MYLIP</i>     | 0.28 | 0.00 | 0.00 | 0.46 | 0.28 | 3 | Endothelial Cells |
| <i>SNAP23</i>    | 0.28 | 0.00 | 0.00 | 0.33 | 0.18 | 3 | Endothelial Cells |
| <i>CAMTA1</i>    | 0.28 | 0.00 | 0.00 | 0.51 | 0.35 | 3 | Endothelial Cells |
| <i>DYNC1H1</i>   | 0.28 | 0.00 | 0.00 | 0.35 | 0.20 | 3 | Endothelial Cells |
| <i>PCGF2</i>     | 0.28 | 0.00 | 0.00 | 0.27 | 0.12 | 3 | Endothelial Cells |
| <i>SERTAD1</i>   | 0.28 | 0.00 | 0.00 | 0.33 | 0.17 | 3 | Endothelial Cells |
| <i>DUSP11</i>    | 0.28 | 0.00 | 0.00 | 0.25 | 0.12 | 3 | Endothelial Cells |
| <i>GNAQ</i>      | 0.27 | 0.00 | 0.00 | 0.32 | 0.15 | 3 | Endothelial Cells |
| <i>POMP</i>      | 0.27 | 0.00 | 0.00 | 0.73 | 0.61 | 3 | Endothelial Cells |
| <i>EVA1B</i>     | 0.27 | 0.00 | 0.00 | 0.27 | 0.14 | 3 | Endothelial Cells |
| <i>KLF3</i>      | 0.27 | 0.00 | 0.00 | 0.26 | 0.12 | 3 | Endothelial Cells |
| <i>UBE2L3</i>    | 0.27 | 0.00 | 0.00 | 0.48 | 0.34 | 3 | Endothelial Cells |
| <i>CD81</i>      | 0.27 | 0.00 | 0.00 | 0.56 | 0.38 | 3 | Endothelial Cells |
| <i>SCP2</i>      | 0.27 | 0.00 | 0.00 | 0.54 | 0.42 | 3 | Endothelial Cells |
| <i>DDIT4</i>     | 0.27 | 0.00 | 0.00 | 0.29 | 0.15 | 3 | Endothelial Cells |
| <i>TXNDC17</i>   | 0.27 | 0.00 | 0.00 | 0.39 | 0.26 | 3 | Endothelial Cells |
| <i>MTF2</i>      | 0.27 | 0.00 | 0.00 | 0.28 | 0.15 | 3 | Endothelial Cells |
| <i>AP2B1</i>     | 0.27 | 0.00 | 0.00 | 0.29 | 0.17 | 3 | Endothelial Cells |

|                 |      |      |      |      |      |   |                   |
|-----------------|------|------|------|------|------|---|-------------------|
| <i>PLEC</i>     | 0.27 | 0.00 | 0.00 | 0.30 | 0.15 | 3 | Endothelial Cells |
| <i>SP100</i>    | 0.27 | 0.00 | 0.00 | 0.35 | 0.18 | 3 | Endothelial Cells |
| <i>UPF3A</i>    | 0.27 | 0.00 | 0.00 | 0.38 | 0.24 | 3 | Endothelial Cells |
| <i>HES1</i>     | 0.27 | 0.00 | 0.00 | 0.50 | 0.38 | 3 | Endothelial Cells |
| <i>BCAP31</i>   | 0.27 | 0.00 | 0.00 | 0.48 | 0.36 | 3 | Endothelial Cells |
| <i>GRAMD1A</i>  | 0.27 | 0.00 | 0.00 | 0.26 | 0.13 | 3 | Endothelial Cells |
| <i>STX10</i>    | 0.27 | 0.00 | 0.00 | 0.33 | 0.17 | 3 | Endothelial Cells |
| <i>MRPL52</i>   | 0.27 | 0.00 | 0.00 | 0.48 | 0.35 | 3 | Endothelial Cells |
| <i>ITSN2</i>    | 0.26 | 0.00 | 0.00 | 0.29 | 0.15 | 3 | Endothelial Cells |
| <i>PAK2</i>     | 0.26 | 0.00 | 0.00 | 0.33 | 0.19 | 3 | Endothelial Cells |
| <i>NDUFB3</i>   | 0.26 | 0.00 | 0.00 | 0.48 | 0.35 | 3 | Endothelial Cells |
| <i>BNIP3</i>    | 0.26 | 0.00 | 0.00 | 0.31 | 0.15 | 3 | Endothelial Cells |
| <i>CHMP2A</i>   | 0.26 | 0.00 | 0.00 | 0.58 | 0.46 | 3 | Endothelial Cells |
| <i>CDK11B</i>   | 0.26 | 0.00 | 0.00 | 0.28 | 0.15 | 3 | Endothelial Cells |
| <i>RNF213</i>   | 0.26 | 0.00 | 0.00 | 0.35 | 0.18 | 3 | Endothelial Cells |
| <i>TMEM258</i>  | 0.26 | 0.00 | 0.00 | 0.79 | 0.71 | 3 | Endothelial Cells |
| <i>PET100</i>   | 0.26 | 0.00 | 0.00 | 0.63 | 0.50 | 3 | Endothelial Cells |
| <i>MOB2</i>     | 0.26 | 0.00 | 0.00 | 0.35 | 0.21 | 3 | Endothelial Cells |
| <i>TUSC3</i>    | 0.26 | 0.00 | 0.00 | 0.35 | 0.20 | 3 | Endothelial Cells |
| <i>MANF</i>     | 0.26 | 0.00 | 0.00 | 0.43 | 0.31 | 3 | Endothelial Cells |
| <i>ARPP19</i>   | 0.26 | 0.00 | 0.00 | 0.35 | 0.21 | 3 | Endothelial Cells |
| <i>SEPW1</i>    | 0.26 | 0.00 | 0.00 | 0.65 | 0.55 | 3 | Endothelial Cells |
| <i>BSG</i>      | 0.26 | 0.00 | 0.00 | 0.76 | 0.65 | 3 | Endothelial Cells |
| <i>AK2</i>      | 0.26 | 0.00 | 0.00 | 0.31 | 0.20 | 3 | Endothelial Cells |
| <i>PDIA6</i>    | 0.26 | 0.00 | 0.00 | 0.64 | 0.52 | 3 | Endothelial Cells |
| <i>WDR60</i>    | 0.26 | 0.00 | 0.00 | 0.30 | 0.17 | 3 | Endothelial Cells |
| <i>TMEM173</i>  | 0.25 | 0.00 | 0.00 | 0.37 | 0.22 | 3 | Endothelial Cells |
| <i>YIPF3</i>    | 0.25 | 0.00 | 0.00 | 0.46 | 0.32 | 3 | Endothelial Cells |
| <i>CASP7</i>    | 0.25 | 0.00 | 0.00 | 0.27 | 0.12 | 3 | Endothelial Cells |
| <i>BAZ1A</i>    | 0.25 | 0.00 | 0.00 | 0.32 | 0.18 | 3 | Endothelial Cells |
| <i>TIMM22</i>   | 0.25 | 0.00 | 0.00 | 0.26 | 0.15 | 3 | Endothelial Cells |
| <i>ORMDL2</i>   | 0.25 | 0.00 | 0.00 | 0.28 | 0.14 | 3 | Endothelial Cells |
| <i>TEAD2</i>    | 0.25 | 0.00 | 0.00 | 0.30 | 0.16 | 3 | Endothelial Cells |
| <i>SMARCA2</i>  | 0.25 | 0.00 | 0.00 | 0.27 | 0.14 | 3 | Endothelial Cells |
| <i>FAM162B</i>  | 2.77 | 0.00 | 0.00 | 0.91 | 0.13 | 4 | Pericytes         |
| <i>HIGD1B</i>   | 2.44 | 0.00 | 0.00 | 1.00 | 0.21 | 4 | Pericytes         |
| <i>NDUFA4L2</i> | 2.15 | 0.00 | 0.00 | 0.95 | 0.16 | 4 | Pericytes         |
| <i>COX4I2</i>   | 2.12 | 0.00 | 0.00 | 0.98 | 0.20 | 4 | Pericytes         |
| <i>CHN1</i>     | 1.96 | 0.00 | 0.00 | 0.96 | 0.20 | 4 | Pericytes         |
| <i>PDGFRB</i>   | 1.69 | 0.00 | 0.00 | 0.98 | 0.33 | 4 | Pericytes         |
| <i>CYGB</i>     | 1.63 | 0.00 | 0.00 | 0.77 | 0.10 | 4 | Pericytes         |
| <i>BGN</i>      | 1.54 | 0.00 | 0.00 | 0.98 | 0.47 | 4 | Pericytes         |
| <i>LPL</i>      | 1.53 | 0.00 | 0.00 | 0.75 | 0.13 | 4 | Pericytes         |

|                 |      |      |      |      |      |   |           |
|-----------------|------|------|------|------|------|---|-----------|
| <i>LHFP</i>     | 1.52 | 0.00 | 0.00 | 0.97 | 0.41 | 4 | Pericytes |
| <i>PAG1</i>     | 1.49 | 0.00 | 0.00 | 0.72 | 0.07 | 4 | Pericytes |
| <i>GUCY1A2</i>  | 1.45 | 0.00 | 0.00 | 0.76 | 0.08 | 4 | Pericytes |
| <i>MEST</i>     | 1.4  | 0.00 | 0.00 | 0.92 | 0.33 | 4 | Pericytes |
| <i>EGFL6</i>    | 1.39 | 0.00 | 0.00 | 0.98 | 0.32 | 4 | Pericytes |
| <i>SDC2</i>     | 1.39 | 0.00 | 0.00 | 0.93 | 0.40 | 4 | Pericytes |
| <i>IMPA2</i>    | 1.38 | 0.00 | 0.00 | 0.64 | 0.09 | 4 | Pericytes |
| <i>TPPP3</i>    | 1.36 | 0.00 | 0.00 | 0.95 | 0.36 | 4 | Pericytes |
| <i>GPX3</i>     | 1.35 | 0.00 | 0.00 | 0.92 | 0.40 | 4 | Pericytes |
| <i>THY1</i>     | 1.26 | 0.00 | 0.00 | 0.69 | 0.13 | 4 | Pericytes |
| <i>RFTN1</i>    | 1.2  | 0.00 | 0.00 | 0.69 | 0.11 | 4 | Pericytes |
| <i>PTN</i>      | 1.2  | 0.00 | 0.00 | 0.90 | 0.26 | 4 | Pericytes |
| <i>KCNK3</i>    | 1.18 | 0.00 | 0.00 | 0.59 | 0.07 | 4 | Pericytes |
| <i>TACC1</i>    | 1.16 | 0.00 | 0.00 | 0.91 | 0.42 | 4 | Pericytes |
| <i>NID1</i>     | 1.15 | 0.00 | 0.00 | 0.74 | 0.17 | 4 | Pericytes |
| <i>GAS6</i>     | 1.15 | 0.00 | 0.00 | 0.78 | 0.25 | 4 | Pericytes |
| <i>COL4A1</i>   | 1.14 | 0.00 | 0.00 | 0.92 | 0.49 | 4 | Pericytes |
| <i>NOTCH3</i>   | 1.11 | 0.00 | 0.00 | 0.76 | 0.18 | 4 | Pericytes |
| <i>ITM2C</i>    | 1.09 | 0.00 | 0.00 | 0.86 | 0.36 | 4 | Pericytes |
| <i>FOXS1</i>    | 1.06 | 0.00 | 0.00 | 0.64 | 0.11 | 4 | Pericytes |
| <i>COL4A2</i>   | 1.06 | 0.00 | 0.00 | 0.91 | 0.51 | 4 | Pericytes |
| <i>IGFBP7</i>   | 1.05 | 0.00 | 0.00 | 0.99 | 0.64 | 4 | Pericytes |
| <i>PCOLCE</i>   | 1.05 | 0.00 | 0.00 | 0.80 | 0.27 | 4 | Pericytes |
| <i>DUSP4</i>    | 1.03 | 0.00 | 0.00 | 0.48 | 0.03 | 4 | Pericytes |
| <i>KCNK17</i>   | 1.03 | 0.00 | 0.00 | 0.45 | 0.06 | 4 | Pericytes |
| <i>RERG</i>     | 1.03 | 0.00 | 0.00 | 0.58 | 0.10 | 4 | Pericytes |
| <i>PERP</i>     | 1.02 | 0.00 | 0.00 | 0.53 | 0.09 | 4 | Pericytes |
| <i>SPRY1</i>    | 1.02 | 0.00 | 0.00 | 0.89 | 0.39 | 4 | Pericytes |
| <i>MYO1B</i>    | 1.02 | 0.00 | 0.00 | 0.69 | 0.16 | 4 | Pericytes |
| <i>SPARC</i>    | 1.01 | 0.00 | 0.00 | 1.00 | 0.84 | 4 | Pericytes |
| <i>UXS1</i>     | 1    | 0.00 | 0.00 | 0.62 | 0.15 | 4 | Pericytes |
| <i>LAMB1</i>    | 0.98 | 0.00 | 0.00 | 0.58 | 0.11 | 4 | Pericytes |
| <i>CADM1</i>    | 0.98 | 0.00 | 0.00 | 0.58 | 0.14 | 4 | Pericytes |
| <i>STOM</i>     | 0.97 | 0.00 | 0.00 | 0.86 | 0.40 | 4 | Pericytes |
| <i>ITGA1</i>    | 0.97 | 0.00 | 0.00 | 0.72 | 0.23 | 4 | Pericytes |
| <i>SEPT11</i>   | 0.97 | 0.00 | 0.00 | 0.74 | 0.27 | 4 | Pericytes |
| <i>NDRG1</i>    | 0.97 | 0.00 | 0.00 | 0.59 | 0.12 | 4 | Pericytes |
| <i>MGLL</i>     | 0.96 | 0.00 | 0.00 | 0.65 | 0.20 | 4 | Pericytes |
| <i>NCK2</i>     | 0.96 | 0.00 | 0.00 | 0.52 | 0.08 | 4 | Pericytes |
| <i>KIAA0040</i> | 0.94 | 0.00 | 0.00 | 0.50 | 0.09 | 4 | Pericytes |
| <i>CCDC102B</i> | 0.94 | 0.00 | 0.00 | 0.52 | 0.07 | 4 | Pericytes |
| <i>PCDH18</i>   | 0.94 | 0.00 | 0.00 | 0.50 | 0.07 | 4 | Pericytes |
| <i>PDE8B</i>    | 0.93 | 0.00 | 0.00 | 0.45 | 0.02 | 4 | Pericytes |

|                 |      |      |      |      |      |   |           |
|-----------------|------|------|------|------|------|---|-----------|
| <i>LAMC3</i>    | 0.9  | 0.00 | 0.00 | 0.41 | 0.01 | 4 | Pericytes |
| <i>TJP1</i>     | 0.88 | 0.00 | 0.00 | 0.67 | 0.25 | 4 | Pericytes |
| <i>NR2F2</i>    | 0.88 | 0.00 | 0.00 | 0.76 | 0.31 | 4 | Pericytes |
| <i>SGCE</i>     | 0.87 | 0.00 | 0.00 | 0.59 | 0.17 | 4 | Pericytes |
| <i>RASL12</i>   | 0.87 | 0.00 | 0.00 | 0.74 | 0.28 | 4 | Pericytes |
| <i>ADAMTSL3</i> | 0.87 | 0.00 | 0.00 | 0.45 | 0.04 | 4 | Pericytes |
| <i>CLEC11A</i>  | 0.87 | 0.00 | 0.00 | 0.58 | 0.17 | 4 | Pericytes |
| <i>GJC1</i>     | 0.86 | 0.00 | 0.00 | 0.49 | 0.09 | 4 | Pericytes |
| <i>LURAP1L</i>  | 0.85 | 0.00 | 0.00 | 0.60 | 0.16 | 4 | Pericytes |
| <i>GUCY1B3</i>  | 0.85 | 0.00 | 0.00 | 0.52 | 0.11 | 4 | Pericytes |
| <i>VSNL1</i>    | 0.84 | 0.00 | 0.00 | 0.41 | 0.03 | 4 | Pericytes |
| <i>P2RY14</i>   | 0.83 | 0.00 | 0.00 | 0.38 | 0.01 | 4 | Pericytes |
| <i>SEPT7</i>    | 0.83 | 0.00 | 0.00 | 0.95 | 0.69 | 4 | Pericytes |
| <i>PLCB1</i>    | 0.83 | 0.00 | 0.00 | 0.43 | 0.05 | 4 | Pericytes |
| <i>HEYL</i>     | 0.83 | 0.00 | 0.00 | 0.49 | 0.10 | 4 | Pericytes |
| <i>HRH2</i>     | 0.82 | 0.00 | 0.00 | 0.47 | 0.09 | 4 | Pericytes |
| <i>EBF1</i>     | 0.81 | 0.00 | 0.00 | 0.45 | 0.08 | 4 | Pericytes |
| <i>TRPC6</i>    | 0.81 | 0.00 | 0.00 | 0.42 | 0.04 | 4 | Pericytes |
| <i>ANXA6</i>    | 0.79 | 0.00 | 0.00 | 0.73 | 0.39 | 4 | Pericytes |
| <i>NDRG2</i>    | 0.78 | 0.00 | 0.00 | 0.70 | 0.30 | 4 | Pericytes |
| <i>SEPT4</i>    | 0.78 | 0.00 | 0.00 | 0.50 | 0.12 | 4 | Pericytes |
| <i>TXNIP</i>    | 0.78 | 0.00 | 0.00 | 0.92 | 0.66 | 4 | Pericytes |
| <i>GPM6B</i>    | 0.77 | 0.00 | 0.00 | 0.68 | 0.26 | 4 | Pericytes |
| <i>PTEN</i>     | 0.77 | 0.00 | 0.00 | 0.52 | 0.16 | 4 | Pericytes |
| <i>FARP1</i>    | 0.76 | 0.00 | 0.00 | 0.44 | 0.10 | 4 | Pericytes |
| <i>DCN</i>      | 0.75 | 0.00 | 0.00 | 0.95 | 0.51 | 4 | Pericytes |
| <i>FERMT2</i>   | 0.74 | 0.00 | 0.00 | 0.66 | 0.30 | 4 | Pericytes |
| <i>MT2A</i>     | 0.71 | 0.00 | 0.00 | 0.94 | 0.60 | 4 | Pericytes |
| <i>RGS3</i>     | 0.71 | 0.00 | 0.00 | 0.54 | 0.25 | 4 | Pericytes |
| <i>TBX2</i>     | 0.7  | 0.00 | 0.00 | 0.71 | 0.32 | 4 | Pericytes |
| <i>ADGRG6</i>   | 0.7  | 0.00 | 0.00 | 0.43 | 0.10 | 4 | Pericytes |
| <i>OLFM2</i>    | 0.69 | 0.00 | 0.00 | 0.36 | 0.06 | 4 | Pericytes |
| <i>ARHGDIB</i>  | 0.69 | 0.00 | 0.00 | 0.70 | 0.27 | 4 | Pericytes |
| <i>FHL5</i>     | 0.68 | 0.00 | 0.00 | 0.32 | 0.01 | 4 | Pericytes |
| <i>SERPING1</i> | 0.68 | 0.00 | 0.00 | 0.75 | 0.36 | 4 | Pericytes |
| <i>SH3KBP1</i>  | 0.68 | 0.00 | 0.00 | 0.51 | 0.16 | 4 | Pericytes |
| <i>GUCY1A3</i>  | 0.67 | 0.00 | 0.00 | 0.59 | 0.22 | 4 | Pericytes |
| <i>CCDC68</i>   | 0.67 | 0.00 | 0.00 | 0.43 | 0.09 | 4 | Pericytes |
| <i>NR2F1</i>    | 0.67 | 0.00 | 0.00 | 0.67 | 0.24 | 4 | Pericytes |
| <i>SLC35B3</i>  | 0.66 | 0.00 | 0.00 | 0.38 | 0.07 | 4 | Pericytes |
| <i>MCTP2</i>    | 0.66 | 0.00 | 0.00 | 0.39 | 0.06 | 4 | Pericytes |
| <i>CALM2</i>    | 0.66 | 0.00 | 0.00 | 0.99 | 0.90 | 4 | Pericytes |
| <i>KLHL23</i>   | 0.65 | 0.00 | 0.00 | 0.49 | 0.17 | 4 | Pericytes |

|                 |      |      |      |      |      |   |           |
|-----------------|------|------|------|------|------|---|-----------|
| <i>GRK5</i>     | 0.65 | 0.00 | 0.00 | 0.45 | 0.17 | 4 | Pericytes |
| <i>HSPA2</i>    | 0.65 | 0.00 | 0.00 | 0.47 | 0.14 | 4 | Pericytes |
| <i>PTGIR</i>    | 0.65 | 0.00 | 0.00 | 0.45 | 0.13 | 4 | Pericytes |
| <i>KCP</i>      | 0.65 | 0.00 | 0.00 | 0.27 | 0.01 | 4 | Pericytes |
| <i>MFGE8</i>    | 0.64 | 0.00 | 0.00 | 0.72 | 0.30 | 4 | Pericytes |
| <i>MEF2C</i>    | 0.64 | 0.00 | 0.00 | 0.74 | 0.40 | 4 | Pericytes |
| <i>PPP1R14A</i> | 0.64 | 0.00 | 0.00 | 0.77 | 0.40 | 4 | Pericytes |
| <i>IGFBP3</i>   | 0.64 | 0.00 | 0.00 | 0.29 | 0.06 | 4 | Pericytes |
| <i>NR3C1</i>    | 0.64 | 0.00 | 0.00 | 0.59 | 0.28 | 4 | Pericytes |
| <i>CALD1</i>    | 0.64 | 0.00 | 0.00 | 0.98 | 0.77 | 4 | Pericytes |
| <i>PELO</i>     | 0.64 | 0.00 | 0.00 | 0.43 | 0.14 | 4 | Pericytes |
| <i>ADGRD1</i>   | 0.63 | 0.00 | 0.00 | 0.28 | 0.03 | 4 | Pericytes |
| <i>ARHGEF17</i> | 0.63 | 0.00 | 0.00 | 0.36 | 0.08 | 4 | Pericytes |
| <i>COL6A3</i>   | 0.62 | 0.00 | 0.00 | 0.84 | 0.34 | 4 | Pericytes |
| <i>CDH6</i>     | 0.62 | 0.00 | 0.00 | 0.40 | 0.09 | 4 | Pericytes |
| <i>TBX5</i>     | 0.62 | 0.00 | 0.00 | 0.41 | 0.10 | 4 | Pericytes |
| <i>NT5DC2</i>   | 0.61 | 0.00 | 0.00 | 0.43 | 0.13 | 4 | Pericytes |
| <i>ITIH5</i>    | 0.61 | 0.00 | 0.00 | 0.35 | 0.08 | 4 | Pericytes |
| <i>CD248</i>    | 0.61 | 0.00 | 0.00 | 0.34 | 0.06 | 4 | Pericytes |
| <i>PLCE1</i>    | 0.6  | 0.00 | 0.00 | 0.34 | 0.08 | 4 | Pericytes |
| <i>HACD4</i>    | 0.6  | 0.00 | 0.00 | 0.33 | 0.06 | 4 | Pericytes |
| <i>PPIC</i>     | 0.6  | 0.00 | 0.00 | 0.65 | 0.34 | 4 | Pericytes |
| <i>EHD2</i>     | 0.6  | 0.00 | 0.00 | 0.62 | 0.33 | 4 | Pericytes |
| <i>ECM1</i>     | 0.59 | 0.00 | 0.00 | 0.30 | 0.03 | 4 | Pericytes |
| <i>MARCKS</i>   | 0.59 | 0.00 | 0.00 | 0.81 | 0.50 | 4 | Pericytes |
| <i>H2AFJ</i>    | 0.59 | 0.00 | 0.00 | 0.67 | 0.37 | 4 | Pericytes |
| <i>GJA4</i>     | 0.59 | 0.00 | 0.00 | 0.46 | 0.13 | 4 | Pericytes |
| <i>EPB41L2</i>  | 0.59 | 0.00 | 0.00 | 0.54 | 0.24 | 4 | Pericytes |
| <i>ADCY3</i>    | 0.58 | 0.00 | 0.00 | 0.33 | 0.06 | 4 | Pericytes |
| <i>RNF152</i>   | 0.58 | 0.00 | 0.00 | 0.27 | 0.07 | 4 | Pericytes |
| <i>ZEB2</i>     | 0.58 | 0.00 | 0.00 | 0.74 | 0.40 | 4 | Pericytes |
| <i>OAZ2</i>     | 0.58 | 0.00 | 0.00 | 0.81 | 0.52 | 4 | Pericytes |
| <i>KCNJ8</i>    | 0.58 | 0.00 | 0.00 | 0.42 | 0.13 | 4 | Pericytes |
| <i>DPYSL2</i>   | 0.58 | 0.00 | 0.00 | 0.57 | 0.27 | 4 | Pericytes |
| <i>MLLT3</i>    | 0.58 | 0.00 | 0.00 | 0.35 | 0.08 | 4 | Pericytes |
| <i>U3.24</i>    | 0.58 | 0.00 | 0.00 | 0.28 | 0.03 | 4 | Pericytes |
| <i>EDNRA</i>    | 0.58 | 0.00 | 0.00 | 0.53 | 0.21 | 4 | Pericytes |
| <i>EZR</i>      | 0.58 | 0.00 | 0.00 | 0.51 | 0.23 | 4 | Pericytes |
| <i>ADGRA2</i>   | 0.57 | 0.00 | 0.00 | 0.39 | 0.11 | 4 | Pericytes |
| <i>ITGB1</i>    | 0.57 | 0.00 | 0.00 | 0.86 | 0.61 | 4 | Pericytes |
| <i>CDC42EP2</i> | 0.57 | 0.00 | 0.00 | 0.36 | 0.09 | 4 | Pericytes |
| <i>PTK2</i>     | 0.57 | 0.00 | 0.00 | 0.62 | 0.27 | 4 | Pericytes |
| <i>MYO10</i>    | 0.57 | 0.00 | 0.00 | 0.38 | 0.10 | 4 | Pericytes |

|                     |      |      |      |      |      |   |           |
|---------------------|------|------|------|------|------|---|-----------|
| <i>F10</i>          | 0.57 | 0.00 | 0.00 | 0.38 | 0.10 | 4 | Pericytes |
| <i>TNFRSF21</i>     | 0.57 | 0.00 | 0.00 | 0.31 | 0.06 | 4 | Pericytes |
| <i>PRSS23</i>       | 0.57 | 0.00 | 0.00 | 0.50 | 0.22 | 4 | Pericytes |
| <i>PLXDC1</i>       | 0.56 | 0.00 | 0.00 | 0.27 | 0.02 | 4 | Pericytes |
| <i>TESC</i>         | 0.56 | 0.00 | 0.00 | 0.29 | 0.04 | 4 | Pericytes |
| <i>COL18A1</i>      | 0.54 | 0.00 | 0.00 | 0.42 | 0.16 | 4 | Pericytes |
| <i>CARMN</i>        | 0.54 | 0.00 | 0.00 | 0.67 | 0.32 | 4 | Pericytes |
| <i>FZD1</i>         | 0.54 | 0.00 | 0.00 | 0.34 | 0.10 | 4 | Pericytes |
| <i>CTD-3193K9.4</i> | 0.54 | 0.00 | 0.00 | 0.30 | 0.06 | 4 | Pericytes |
| <i>TFPI</i>         | 0.53 | 0.00 | 0.00 | 0.74 | 0.41 | 4 | Pericytes |
| <i>WFDC1</i>        | 0.53 | 0.00 | 0.00 | 0.50 | 0.22 | 4 | Pericytes |
| <i>FABP5</i>        | 0.53 | 0.00 | 0.00 | 0.63 | 0.24 | 4 | Pericytes |
| <i>ARHGAP42</i>     | 0.53 | 0.00 | 0.00 | 0.30 | 0.06 | 4 | Pericytes |
| <i>TMEM173</i>      | 0.53 | 0.00 | 0.00 | 0.49 | 0.21 | 4 | Pericytes |
| <i>EDIL3</i>        | 0.53 | 0.00 | 0.00 | 0.36 | 0.11 | 4 | Pericytes |
| <i>AXL</i>          | 0.52 | 0.00 | 0.00 | 0.46 | 0.21 | 4 | Pericytes |
| <i>HES4</i>         | 0.52 | 0.00 | 0.00 | 0.54 | 0.24 | 4 | Pericytes |
| <i>NR2F2-AS1</i>    | 0.52 | 0.00 | 0.00 | 0.36 | 0.10 | 4 | Pericytes |
| <i>TMEM59</i>       | 0.52 | 0.00 | 0.00 | 0.87 | 0.67 | 4 | Pericytes |
| <i>DOK6</i>         | 0.51 | 0.00 | 0.00 | 0.26 | 0.03 | 4 | Pericytes |
| <i>HOXB-AS1</i>     | 0.51 | 0.00 | 0.00 | 0.30 | 0.07 | 4 | Pericytes |
| <i>TNS3</i>         | 0.51 | 0.00 | 0.00 | 0.34 | 0.09 | 4 | Pericytes |
| <i>TNS1</i>         | 0.51 | 0.00 | 0.00 | 0.46 | 0.22 | 4 | Pericytes |
| <i>EPS8</i>         | 0.51 | 0.00 | 0.00 | 0.32 | 0.09 | 4 | Pericytes |
| <i>PON2</i>         | 0.51 | 0.00 | 0.00 | 0.50 | 0.22 | 4 | Pericytes |
| <i>PLAC9</i>        | 0.5  | 0.00 | 0.00 | 0.72 | 0.38 | 4 | Pericytes |
| <i>AFAP1L2</i>      | 0.5  | 0.00 | 0.00 | 0.28 | 0.04 | 4 | Pericytes |
| <i>HIBADH</i>       | 0.5  | 0.00 | 0.00 | 0.44 | 0.19 | 4 | Pericytes |
| <i>DENND2A</i>      | 0.5  | 0.00 | 0.00 | 0.31 | 0.08 | 4 | Pericytes |
| <i>LGALS3BP</i>     | 0.49 | 0.00 | 0.00 | 0.43 | 0.18 | 4 | Pericytes |
| <i>TNS2</i>         | 0.49 | 0.00 | 0.00 | 0.38 | 0.15 | 4 | Pericytes |
| <i>LAMA2</i>        | 0.49 | 0.00 | 0.00 | 0.27 | 0.04 | 4 | Pericytes |
| <i>GPR183</i>       | 0.49 | 0.00 | 0.00 | 0.28 | 0.05 | 4 | Pericytes |
| <i>CLIP1</i>        | 0.48 | 0.00 | 0.00 | 0.36 | 0.13 | 4 | Pericytes |
| <i>PPP1R12A</i>     | 0.48 | 0.00 | 0.00 | 0.71 | 0.45 | 4 | Pericytes |
| <i>MCAM</i>         | 0.48 | 0.00 | 0.00 | 0.48 | 0.21 | 4 | Pericytes |
| <i>VASN</i>         | 0.47 | 0.00 | 0.00 | 0.37 | 0.15 | 4 | Pericytes |
| <i>TGFB1</i>        | 0.47 | 0.00 | 0.00 | 0.75 | 0.32 | 4 | Pericytes |
| <i>GOLIM4</i>       | 0.47 | 0.00 | 0.00 | 0.47 | 0.26 | 4 | Pericytes |
| <i>AP2M1</i>        | 0.47 | 0.00 | 0.00 | 0.80 | 0.59 | 4 | Pericytes |
| <i>DLC1</i>         | 0.46 | 0.00 | 0.00 | 0.46 | 0.21 | 4 | Pericytes |
| <i>ZBTB38</i>       | 0.46 | 0.00 | 0.00 | 0.43 | 0.22 | 4 | Pericytes |

|                   |      |      |      |      |      |   |           |
|-------------------|------|------|------|------|------|---|-----------|
| <i>SEMA5A</i>     | 0.46 | 0.00 | 0.00 | 0.34 | 0.11 | 4 | Pericytes |
| <i>NDN</i>        | 0.46 | 0.00 | 0.00 | 0.58 | 0.32 | 4 | Pericytes |
| <i>PACSIN3</i>    | 0.45 | 0.00 | 0.00 | 0.28 | 0.08 | 4 | Pericytes |
| <i>TMEM204</i>    | 0.45 | 0.00 | 0.00 | 0.45 | 0.16 | 4 | Pericytes |
| <i>HOXB5</i>      | 0.45 | 0.00 | 0.00 | 0.38 | 0.16 | 4 | Pericytes |
| <i>ARHGAP15</i>   | 0.45 | 0.00 | 0.00 | 0.39 | 0.15 | 4 | Pericytes |
| <i>MXRA8</i>      | 0.45 | 0.00 | 0.00 | 0.53 | 0.29 | 4 | Pericytes |
| <i>BBX</i>        | 0.44 | 0.00 | 0.00 | 0.51 | 0.29 | 4 | Pericytes |
| <i>COX7A1</i>     | 0.44 | 0.00 | 0.00 | 0.65 | 0.43 | 4 | Pericytes |
| <i>PIK3R1</i>     | 0.44 | 0.00 | 0.00 | 0.37 | 0.14 | 4 | Pericytes |
| <i>ARHGEF12</i>   | 0.44 | 0.00 | 0.00 | 0.45 | 0.23 | 4 | Pericytes |
| <i>ABTB1</i>      | 0.44 | 0.00 | 0.00 | 0.32 | 0.12 | 4 | Pericytes |
| <i>CSPG4</i>      | 0.44 | 0.00 | 0.00 | 0.26 | 0.06 | 4 | Pericytes |
| <i>NES</i>        | 0.44 | 0.00 | 0.00 | 0.32 | 0.11 | 4 | Pericytes |
| <i>EFEMP2</i>     | 0.43 | 0.00 | 0.00 | 0.57 | 0.35 | 4 | Pericytes |
| <i>RRAD</i>       | 0.43 | 0.00 | 0.00 | 0.39 | 0.17 | 4 | Pericytes |
| <i>CD4</i>        | 0.43 | 0.00 | 0.00 | 0.30 | 0.09 | 4 | Pericytes |
| <i>FOXF2</i>      | 0.43 | 0.00 | 0.00 | 0.27 | 0.07 | 4 | Pericytes |
| <i>FRMD4B</i>     | 0.42 | 0.00 | 0.00 | 0.35 | 0.14 | 4 | Pericytes |
| <i>AC013461.1</i> | 0.42 | 0.00 | 0.00 | 0.60 | 0.35 | 4 | Pericytes |
| <i>BCAR1</i>      | 0.42 | 0.00 | 0.00 | 0.36 | 0.17 | 4 | Pericytes |
| <i>ADAMTS9</i>    | 0.42 | 0.00 | 0.00 | 0.26 | 0.13 | 4 | Pericytes |
| <i>COL1A2</i>     | 0.42 | 0.00 | 0.00 | 0.98 | 0.62 | 4 | Pericytes |
| <i>COL6A2</i>     | 0.41 | 0.00 | 0.00 | 0.87 | 0.60 | 4 | Pericytes |
| <i>TRPV2</i>      | 0.41 | 0.00 | 0.00 | 0.25 | 0.07 | 4 | Pericytes |
| <i>CSNK1E</i>     | 0.41 | 0.00 | 0.00 | 0.39 | 0.22 | 4 | Pericytes |
| <i>TGFB111</i>    | 0.4  | 0.00 | 0.00 | 0.66 | 0.40 | 4 | Pericytes |
| <i>NDUFAF4</i>    | 0.4  | 0.00 | 0.00 | 0.33 | 0.14 | 4 | Pericytes |
| <i>RRAS2</i>      | 0.4  | 0.00 | 0.00 | 0.28 | 0.10 | 4 | Pericytes |
| <i>ISYNA1</i>     | 0.4  | 0.00 | 0.00 | 0.43 | 0.19 | 4 | Pericytes |
| <i>VAMP5</i>      | 0.4  | 0.00 | 0.00 | 0.77 | 0.49 | 4 | Pericytes |
| <i>SMTN</i>       | 0.39 | 0.00 | 0.00 | 0.48 | 0.27 | 4 | Pericytes |
| <i>TBX2-AS1</i>   | 0.39 | 0.00 | 0.00 | 0.40 | 0.19 | 4 | Pericytes |
| <i>ADH5</i>       | 0.39 | 0.00 | 0.00 | 0.54 | 0.32 | 4 | Pericytes |
| <i>NR2F1-AS1</i>  | 0.39 | 0.00 | 0.00 | 0.28 | 0.10 | 4 | Pericytes |
| <i>MAP1LC3A</i>   | 0.39 | 0.00 | 0.00 | 0.50 | 0.29 | 4 | Pericytes |
| <i>BNIP3L</i>     | 0.39 | 0.00 | 0.00 | 0.60 | 0.38 | 4 | Pericytes |
| <i>ITPRIPL2</i>   | 0.39 | 0.00 | 0.00 | 0.26 | 0.09 | 4 | Pericytes |
| <i>KLHL42</i>     | 0.39 | 0.00 | 0.00 | 0.28 | 0.11 | 4 | Pericytes |
| <i>CTBP2</i>      | 0.39 | 0.00 | 0.00 | 0.40 | 0.21 | 4 | Pericytes |
| <i>REM1</i>       | 0.39 | 0.00 | 0.00 | 0.26 | 0.09 | 4 | Pericytes |
| <i>PLEKHA5</i>    | 0.39 | 0.00 | 0.00 | 0.29 | 0.10 | 4 | Pericytes |
| <i>UBA2</i>       | 0.39 | 0.00 | 0.00 | 0.44 | 0.26 | 4 | Pericytes |

|                 |      |      |      |      |      |   |           |
|-----------------|------|------|------|------|------|---|-----------|
| <i>SYDE1</i>    | 0.38 | 0.00 | 0.00 | 0.25 | 0.08 | 4 | Pericytes |
| <i>SYPL1</i>    | 0.38 | 0.00 | 0.00 | 0.54 | 0.34 | 4 | Pericytes |
| <i>WLS</i>      | 0.38 | 0.00 | 0.00 | 0.34 | 0.15 | 4 | Pericytes |
| <i>LMCD1</i>    | 0.38 | 0.00 | 0.00 | 0.64 | 0.36 | 4 | Pericytes |
| <i>MT1E</i>     | 0.38 | 0.00 | 0.00 | 0.44 | 0.22 | 4 | Pericytes |
| <i>RPS6KA2</i>  | 0.38 | 0.00 | 0.00 | 0.29 | 0.09 | 4 | Pericytes |
| <i>RGS5</i>     | 0.38 | 0.00 | 0.00 | 0.40 | 0.23 | 4 | Pericytes |
| <i>EMC2</i>     | 0.38 | 0.00 | 0.00 | 0.36 | 0.18 | 4 | Pericytes |
| <i>TAOK3</i>    | 0.38 | 0.00 | 0.00 | 0.34 | 0.15 | 4 | Pericytes |
| <i>F2R</i>      | 0.37 | 0.00 | 0.00 | 0.26 | 0.09 | 4 | Pericytes |
| <i>PHLDA1</i>   | 0.37 | 0.00 | 0.00 | 0.41 | 0.23 | 4 | Pericytes |
| <i>HOXB2</i>    | 0.37 | 0.00 | 0.00 | 0.34 | 0.16 | 4 | Pericytes |
| <i>NOTCH2</i>   | 0.37 | 0.00 | 0.00 | 0.26 | 0.11 | 4 | Pericytes |
| <i>PLEKHA2</i>  | 0.37 | 0.00 | 0.00 | 0.26 | 0.09 | 4 | Pericytes |
| <i>LEPROT</i>   | 0.37 | 0.00 | 0.00 | 0.61 | 0.41 | 4 | Pericytes |
| <i>TXNL1</i>    | 0.36 | 0.00 | 0.00 | 0.52 | 0.33 | 4 | Pericytes |
| <i>PSIP1</i>    | 0.36 | 0.00 | 0.00 | 0.57 | 0.37 | 4 | Pericytes |
| <i>LIMS1</i>    | 0.36 | 0.00 | 0.00 | 0.54 | 0.32 | 4 | Pericytes |
| <i>UBE2E2</i>   | 0.36 | 0.00 | 0.00 | 0.34 | 0.16 | 4 | Pericytes |
| <i>MYH9</i>     | 0.36 | 0.00 | 0.00 | 0.63 | 0.43 | 4 | Pericytes |
| <i>ASAH1</i>    | 0.36 | 0.00 | 0.00 | 0.48 | 0.28 | 4 | Pericytes |
| <i>TMEM47</i>   | 0.36 | 0.00 | 0.00 | 0.32 | 0.16 | 4 | Pericytes |
| <i>PRRT2</i>    | 0.35 | 0.00 | 0.00 | 0.26 | 0.09 | 4 | Pericytes |
| <i>DOCK6</i>    | 0.35 | 0.00 | 0.00 | 0.34 | 0.13 | 4 | Pericytes |
| 2-Sep           | 0.35 | 0.00 | 0.00 | 0.71 | 0.53 | 4 | Pericytes |
| <i>ITGA8</i>    | 0.35 | 0.00 | 0.00 | 0.29 | 0.11 | 4 | Pericytes |
| <i>TCEAL7</i>   | 0.35 | 0.00 | 0.00 | 0.30 | 0.11 | 4 | Pericytes |
| <i>PAWR</i>     | 0.35 | 0.00 | 0.00 | 0.31 | 0.16 | 4 | Pericytes |
| <i>SNAI2</i>    | 0.35 | 0.00 | 0.00 | 0.27 | 0.12 | 4 | Pericytes |
| <i>BCHE</i>     | 0.35 | 0.00 | 0.00 | 0.35 | 0.15 | 4 | Pericytes |
| <i>RPLP0P2</i>  | 0.34 | 0.00 | 0.00 | 0.39 | 0.25 | 4 | Pericytes |
| <i>IFI27L2</i>  | 0.34 | 0.00 | 0.00 | 0.53 | 0.32 | 4 | Pericytes |
| <i>PKIG</i>     | 0.34 | 0.00 | 0.00 | 0.57 | 0.37 | 4 | Pericytes |
| <i>SERPINI1</i> | 0.34 | 0.00 | 0.00 | 0.28 | 0.12 | 4 | Pericytes |
| <i>CYB5B</i>    | 0.34 | 0.00 | 0.00 | 0.39 | 0.24 | 4 | Pericytes |
| <i>ARHGAP24</i> | 0.33 | 0.00 | 0.00 | 0.25 | 0.09 | 4 | Pericytes |
| <i>HOTAIRM1</i> | 0.33 | 0.00 | 0.00 | 0.32 | 0.16 | 4 | Pericytes |
| <i>TCF4</i>     | 0.33 | 0.00 | 0.00 | 0.74 | 0.46 | 4 | Pericytes |
| <i>CTDSPL</i>   | 0.33 | 0.00 | 0.00 | 0.27 | 0.10 | 4 | Pericytes |
| <i>ISCA1</i>    | 0.33 | 0.00 | 0.00 | 0.36 | 0.20 | 4 | Pericytes |
| <i>BEX3</i>     | 0.33 | 0.00 | 0.00 | 0.87 | 0.66 | 4 | Pericytes |
| <i>FOXF1</i>    | 0.33 | 0.00 | 0.00 | 0.48 | 0.24 | 4 | Pericytes |
| <i>PTP4A3</i>   | 0.33 | 0.00 | 0.00 | 0.44 | 0.23 | 4 | Pericytes |

|          |      |      |      |      |      |   |           |
|----------|------|------|------|------|------|---|-----------|
| ZFHX3    | 0.33 | 0.00 | 0.00 | 0.43 | 0.26 | 4 | Pericytes |
| ECE1     | 0.32 | 0.00 | 0.00 | 0.29 | 0.14 | 4 | Pericytes |
| COL6A1   | 0.32 | 0.00 | 0.00 | 0.78 | 0.51 | 4 | Pericytes |
| TCEAL8   | 0.32 | 0.00 | 0.00 | 0.54 | 0.37 | 4 | Pericytes |
| RHOC     | 0.32 | 0.00 | 0.00 | 0.80 | 0.59 | 4 | Pericytes |
| PMP22    | 0.32 | 0.00 | 0.00 | 0.70 | 0.46 | 4 | Pericytes |
| LAPTM4A  | 0.32 | 0.00 | 0.00 | 0.96 | 0.84 | 4 | Pericytes |
| LGALS1   | 0.31 | 0.00 | 0.00 | 0.98 | 0.89 | 4 | Pericytes |
| HOXB4    | 0.31 | 0.00 | 0.00 | 0.31 | 0.15 | 4 | Pericytes |
| DDR2     | 0.31 | 0.00 | 0.00 | 0.25 | 0.11 | 4 | Pericytes |
| KLHDC8B  | 0.31 | 0.00 | 0.00 | 0.26 | 0.13 | 4 | Pericytes |
| ATAD1    | 0.31 | 0.00 | 0.00 | 0.28 | 0.14 | 4 | Pericytes |
| ARHGAP29 | 0.31 | 0.00 | 0.00 | 0.62 | 0.30 | 4 | Pericytes |
| KLHDC3   | 0.31 | 0.00 | 0.00 | 0.43 | 0.26 | 4 | Pericytes |
| DARS     | 0.31 | 0.00 | 0.00 | 0.41 | 0.27 | 4 | Pericytes |
| HOXB6    | 0.31 | 0.00 | 0.00 | 0.27 | 0.11 | 4 | Pericytes |
| AHNAK    | 0.3  | 0.00 | 0.00 | 0.54 | 0.38 | 4 | Pericytes |
| RPS27L   | 0.3  | 0.00 | 0.00 | 0.72 | 0.56 | 4 | Pericytes |
| HSD17B12 | 0.3  | 0.00 | 0.00 | 0.45 | 0.29 | 4 | Pericytes |
| EIF4A2   | 0.3  | 0.00 | 0.00 | 0.90 | 0.74 | 4 | Pericytes |
| CD47     | 0.3  | 0.00 | 0.00 | 0.35 | 0.20 | 4 | Pericytes |
| TCAF1    | 0.3  | 0.00 | 0.00 | 0.32 | 0.19 | 4 | Pericytes |
| C12orf57 | 0.3  | 0.00 | 0.00 | 0.79 | 0.61 | 4 | Pericytes |
| SNW1     | 0.29 | 0.00 | 0.00 | 0.42 | 0.27 | 4 | Pericytes |
| EVA1B    | 0.29 | 0.00 | 0.00 | 0.29 | 0.14 | 4 | Pericytes |
| RPS7     | 0.29 | 0.00 | 0.00 | 1.00 | 0.97 | 4 | Pericytes |
| SKP1     | 0.29 | 0.00 | 0.00 | 0.93 | 0.83 | 4 | Pericytes |
| ARMCX1   | 0.29 | 0.00 | 0.00 | 0.32 | 0.18 | 4 | Pericytes |
| CRTC3    | 0.29 | 0.00 | 0.00 | 0.27 | 0.15 | 4 | Pericytes |
| MID1IP1  | 0.28 | 0.00 | 0.00 | 0.27 | 0.15 | 4 | Pericytes |
| FAM204A  | 0.28 | 0.00 | 0.00 | 0.38 | 0.25 | 4 | Pericytes |
| MYLIP    | 0.28 | 0.00 | 0.00 | 0.46 | 0.29 | 4 | Pericytes |
| VAMP2    | 0.28 | 0.00 | 0.00 | 0.67 | 0.52 | 4 | Pericytes |
| WASF2    | 0.28 | 0.00 | 0.00 | 0.58 | 0.42 | 4 | Pericytes |
| COMMD7   | 0.28 | 0.00 | 0.00 | 0.37 | 0.23 | 4 | Pericytes |
| GYPC     | 0.28 | 0.00 | 0.00 | 0.48 | 0.31 | 4 | Pericytes |
| RBBP7    | 0.27 | 0.00 | 0.00 | 0.44 | 0.29 | 4 | Pericytes |
| MORF4L1  | 0.27 | 0.00 | 0.00 | 0.90 | 0.78 | 4 | Pericytes |
| TWSG1    | 0.27 | 0.00 | 0.00 | 0.30 | 0.17 | 4 | Pericytes |
| HES1     | 0.27 | 0.00 | 0.00 | 0.65 | 0.36 | 4 | Pericytes |
| ARL5A    | 0.27 | 0.00 | 0.00 | 0.32 | 0.20 | 4 | Pericytes |
| FKBP8    | 0.27 | 0.00 | 0.00 | 0.62 | 0.47 | 4 | Pericytes |
| CBR1     | 0.27 | 0.00 | 0.00 | 0.28 | 0.16 | 4 | Pericytes |

|                 |      |      |      |      |      |   |               |
|-----------------|------|------|------|------|------|---|---------------|
| <i>ADGRF5</i>   | 0.27 | 0.00 | 0.00 | 0.33 | 0.16 | 4 | Pericytes     |
| <i>SEPT9</i>    | 0.27 | 0.00 | 0.00 | 0.38 | 0.23 | 4 | Pericytes     |
| <i>SNRK</i>     | 0.26 | 0.00 | 0.00 | 0.27 | 0.12 | 4 | Pericytes     |
| <i>EID1</i>     | 0.26 | 0.00 | 0.00 | 0.90 | 0.78 | 4 | Pericytes     |
| <i>ID3</i>      | 0.26 | 0.00 | 0.00 | 0.75 | 0.52 | 4 | Pericytes     |
| <i>LAMP1</i>    | 0.26 | 0.00 | 0.00 | 0.58 | 0.43 | 4 | Pericytes     |
| <i>MT-RNR1</i>  | 0.26 | 0.00 | 0.00 | 0.97 | 0.95 | 4 | Pericytes     |
| <i>NDUFS2</i>   | 0.26 | 0.00 | 0.00 | 0.39 | 0.28 | 4 | Pericytes     |
| <i>RCN2</i>     | 0.26 | 0.00 | 0.00 | 0.57 | 0.40 | 4 | Pericytes     |
| <i>MDH1</i>     | 0.26 | 0.00 | 0.00 | 0.40 | 0.28 | 4 | Pericytes     |
| <i>ADI1</i>     | 0.26 | 0.00 | 0.00 | 0.40 | 0.26 | 4 | Pericytes     |
| <i>SLC25A37</i> | 0.26 | 0.00 | 0.00 | 0.31 | 0.18 | 4 | Pericytes     |
| <i>EMP1</i>     | 0.26 | 0.00 | 0.00 | 0.40 | 0.22 | 4 | Pericytes     |
| <i>GCC2</i>     | 0.26 | 0.00 | 0.00 | 0.33 | 0.20 | 4 | Pericytes     |
| <i>SEPT15</i>   | 0.25 | 0.00 | 0.00 | 0.66 | 0.51 | 4 | Pericytes     |
| <i>TERF2IP</i>  | 0.25 | 0.00 | 0.00 | 0.50 | 0.38 | 4 | Pericytes     |
| <i>CD59</i>     | 0.25 | 0.00 | 0.00 | 0.85 | 0.58 | 4 | Pericytes     |
| <i>CUTA</i>     | 0.25 | 0.00 | 0.00 | 0.68 | 0.54 | 4 | Pericytes     |
| <i>ATP2B1</i>   | 0.25 | 0.00 | 0.00 | 0.37 | 0.25 | 4 | Pericytes     |
| <i>FBLIM1</i>   | 0.25 | 0.00 | 0.00 | 0.27 | 0.18 | 4 | Pericytes     |
| <i>FKBP10</i>   | 0.25 | 0.00 | 0.00 | 0.34 | 0.20 | 4 | Pericytes     |
| <i>CXCL14</i>   | 2.1  | 0.00 | 0.00 | 0.63 | 0.04 | 5 | Stromal Cells |
| <i>FBLN1</i>    | 1.73 | 0.00 | 0.00 | 0.89 | 0.26 | 5 | Stromal Cells |
| <i>COL3A1</i>   | 1.73 | 0.00 | 0.00 | 0.97 | 0.56 | 5 | Stromal Cells |
| <i>SERPINF1</i> | 1.52 | 0.00 | 0.00 | 0.53 | 0.04 | 5 | Stromal Cells |
| <i>COL1A1</i>   | 1.41 | 0.00 | 0.00 | 0.95 | 0.60 | 5 | Stromal Cells |
| <i>CCDC80</i>   | 1.38 | 0.00 | 0.00 | 0.69 | 0.20 | 5 | Stromal Cells |
| <i>COL1A2</i>   | 1.21 | 0.00 | 0.00 | 0.97 | 0.62 | 5 | Stromal Cells |
| <i>DCN</i>      | 1.18 | 0.00 | 0.00 | 0.95 | 0.51 | 5 | Stromal Cells |
| <i>NBL1</i>     | 1.15 | 0.00 | 0.00 | 0.86 | 0.34 | 5 | Stromal Cells |
| <i>MMP2</i>     | 1.12 | 0.00 | 0.00 | 0.85 | 0.31 | 5 | Stromal Cells |
| <i>IGF1</i>     | 1.1  | 0.00 | 0.00 | 0.35 | 0.07 | 5 | Stromal Cells |
| <i>OGN</i>      | 0.97 | 0.00 | 0.00 | 0.53 | 0.12 | 5 | Stromal Cells |
| <i>CFH</i>      | 0.94 | 0.00 | 0.00 | 0.41 | 0.10 | 5 | Stromal Cells |
| <i>PDGFRA</i>   | 0.93 | 0.00 | 0.00 | 0.38 | 0.04 | 5 | Stromal Cells |
| <i>MGP</i>      | 0.91 | 0.00 | 0.00 | 0.79 | 0.65 | 5 | Stromal Cells |
| <i>CTGF</i>     | 0.85 | 0.00 | 0.00 | 0.39 | 0.21 | 5 | Stromal Cells |
| <i>PMP22</i>    | 0.84 | 0.00 | 0.00 | 0.85 | 0.46 | 5 | Stromal Cells |
| <i>A2M</i>      | 0.84 | 0.00 | 0.00 | 0.89 | 0.60 | 5 | Stromal Cells |
| <i>PRSS23</i>   | 0.82 | 0.00 | 0.00 | 0.56 | 0.22 | 5 | Stromal Cells |
| <i>RND3</i>     | 0.82 | 0.00 | 0.00 | 0.53 | 0.17 | 5 | Stromal Cells |
| <i>FGF7</i>     | 0.81 | 0.00 | 0.00 | 0.40 | 0.08 | 5 | Stromal Cells |
| <i>CLU</i>      | 0.81 | 0.00 | 0.00 | 0.53 | 0.31 | 5 | Stromal Cells |

|                |      |      |      |      |      |   |               |
|----------------|------|------|------|------|------|---|---------------|
| <i>FHL1</i>    | 0.8  | 0.00 | 0.00 | 0.87 | 0.55 | 5 | Stromal Cells |
| <i>C1S</i>     | 0.8  | 0.00 | 0.00 | 0.59 | 0.19 | 5 | Stromal Cells |
| <i>ALDH1A1</i> | 0.79 | 0.00 | 0.00 | 0.35 | 0.11 | 5 | Stromal Cells |
| <i>C2orf40</i> | 0.77 | 0.00 | 0.00 | 0.31 | 0.15 | 5 | Stromal Cells |
| <i>FBN1</i>    | 0.76 | 0.00 | 0.00 | 0.50 | 0.13 | 5 | Stromal Cells |
| <i>ADH1B</i>   | 0.75 | 0.00 | 0.00 | 0.56 | 0.24 | 5 | Stromal Cells |
| <i>C7</i>      | 0.74 | 0.00 | 0.00 | 0.38 | 0.16 | 5 | Stromal Cells |
| <i>ASPN</i>    | 0.74 | 0.00 | 0.00 | 0.32 | 0.07 | 5 | Stromal Cells |
| <i>BMP4</i>    | 0.74 | 0.00 | 0.00 | 0.34 | 0.08 | 5 | Stromal Cells |
| <i>PCOLCE</i>  | 0.73 | 0.00 | 0.00 | 0.60 | 0.29 | 5 | Stromal Cells |
| <i>LUM</i>     | 0.73 | 0.00 | 0.00 | 0.67 | 0.36 | 5 | Stromal Cells |
| <i>CDH11</i>   | 0.72 | 0.00 | 0.00 | 0.57 | 0.18 | 5 | Stromal Cells |
| <i>FSTL1</i>   | 0.71 | 0.00 | 0.00 | 0.80 | 0.41 | 5 | Stromal Cells |
| <i>C1R</i>     | 0.71 | 0.00 | 0.00 | 0.54 | 0.23 | 5 | Stromal Cells |
| <i>HTRA3</i>   | 0.71 | 0.00 | 0.00 | 0.30 | 0.04 | 5 | Stromal Cells |
| <i>DPT</i>     | 0.7  | 0.00 | 0.00 | 0.26 | 0.04 | 5 | Stromal Cells |
| <i>CPE</i>     | 0.7  | 0.00 | 0.00 | 0.54 | 0.24 | 5 | Stromal Cells |
| <i>LTBP4</i>   | 0.69 | 0.00 | 0.00 | 0.66 | 0.27 | 5 | Stromal Cells |
| <i>TNC</i>     | 0.69 | 0.00 | 0.00 | 0.44 | 0.15 | 5 | Stromal Cells |
| <i>ELN</i>     | 0.67 | 0.00 | 0.00 | 0.86 | 0.52 | 5 | Stromal Cells |
| <i>MFAP4</i>   | 0.66 | 0.00 | 0.00 | 0.89 | 0.47 | 5 | Stromal Cells |
| <i>TSPAN8</i>  | 0.64 | 0.00 | 0.00 | 0.27 | 0.02 | 5 | Stromal Cells |
| <i>LMO4</i>    | 0.64 | 0.00 | 0.00 | 0.66 | 0.36 | 5 | Stromal Cells |
| <i>COL6A1</i>  | 0.62 | 0.00 | 0.00 | 0.88 | 0.51 | 5 | Stromal Cells |
| <i>PTGDS</i>   | 0.62 | 0.00 | 0.00 | 0.31 | 0.16 | 5 | Stromal Cells |
| <i>ROBO2</i>   | 0.62 | 0.00 | 0.00 | 0.34 | 0.05 | 5 | Stromal Cells |
| <i>COL6A2</i>  | 0.61 | 0.00 | 0.00 | 0.89 | 0.61 | 5 | Stromal Cells |
| <i>CYR61</i>   | 0.61 | 0.00 | 0.00 | 0.50 | 0.21 | 5 | Stromal Cells |
| <i>CCL2</i>    | 0.61 | 0.00 | 0.00 | 0.32 | 0.16 | 5 | Stromal Cells |
| <i>TMEM98</i>  | 0.61 | 0.00 | 0.00 | 0.66 | 0.30 | 5 | Stromal Cells |
| <i>MMP23B</i>  | 0.6  | 0.00 | 0.00 | 0.46 | 0.12 | 5 | Stromal Cells |
| <i>DKK3</i>    | 0.6  | 0.00 | 0.00 | 0.62 | 0.26 | 5 | Stromal Cells |
| <i>SCN7A</i>   | 0.6  | 0.00 | 0.00 | 0.38 | 0.09 | 5 | Stromal Cells |
| <i>POSTN</i>   | 0.59 | 0.00 | 0.00 | 0.44 | 0.20 | 5 | Stromal Cells |
| <i>RARRES2</i> | 0.59 | 0.00 | 0.00 | 0.89 | 0.49 | 5 | Stromal Cells |
| <i>CTSK</i>    | 0.59 | 0.00 | 0.00 | 0.31 | 0.04 | 5 | Stromal Cells |
| <i>RCN3</i>    | 0.57 | 0.00 | 0.00 | 0.32 | 0.06 | 5 | Stromal Cells |
| <i>CFD</i>     | 0.57 | 0.00 | 0.00 | 0.48 | 0.27 | 5 | Stromal Cells |
| <i>SPON1</i>   | 0.56 | 0.00 | 0.00 | 0.45 | 0.15 | 5 | Stromal Cells |
| <i>GSTM5</i>   | 0.55 | 0.00 | 0.00 | 0.37 | 0.12 | 5 | Stromal Cells |
| <i>MEG3</i>    | 0.55 | 0.00 | 0.00 | 0.72 | 0.42 | 5 | Stromal Cells |
| <i>GFRA2</i>   | 0.54 | 0.00 | 0.00 | 0.26 | 0.04 | 5 | Stromal Cells |
| <i>NR2F1</i>   | 0.53 | 0.00 | 0.00 | 0.60 | 0.25 | 5 | Stromal Cells |

|                     |      |      |      |      |      |   |               |
|---------------------|------|------|------|------|------|---|---------------|
| <i>RARRES1</i>      | 0.51 | 0.00 | 0.00 | 0.42 | 0.16 | 5 | Stromal Cells |
| <i>C1QTNF7</i>      | 0.51 | 0.00 | 0.00 | 0.27 | 0.04 | 5 | Stromal Cells |
| <i>MATN2</i>        | 0.5  | 0.00 | 0.00 | 0.28 | 0.06 | 5 | Stromal Cells |
| <i>TIMP3</i>        | 0.5  | 0.00 | 0.00 | 0.70 | 0.54 | 5 | Stromal Cells |
| <i>CD82</i>         | 0.5  | 0.00 | 0.00 | 0.50 | 0.25 | 5 | Stromal Cells |
| <i>LTBP2</i>        | 0.5  | 0.00 | 0.00 | 0.38 | 0.12 | 5 | Stromal Cells |
| <i>PLPP3</i>        | 0.49 | 0.00 | 0.00 | 0.54 | 0.28 | 5 | Stromal Cells |
| <i>OLFML3</i>       | 0.49 | 0.00 | 0.00 | 0.46 | 0.19 | 5 | Stromal Cells |
| <i>LMCD1</i>        | 0.49 | 0.00 | 0.00 | 0.62 | 0.36 | 5 | Stromal Cells |
| <i>FBLN5</i>        | 0.48 | 0.00 | 0.00 | 0.38 | 0.16 | 5 | Stromal Cells |
| <i>IGFBP6</i>       | 0.48 | 0.00 | 0.00 | 0.25 | 0.05 | 5 | Stromal Cells |
| <i>CYBRD1</i>       | 0.48 | 0.00 | 0.00 | 0.39 | 0.14 | 5 | Stromal Cells |
| <i>COL5A1</i>       | 0.47 | 0.00 | 0.00 | 0.51 | 0.21 | 5 | Stromal Cells |
| <i>ANXA5</i>        | 0.47 | 0.00 | 0.00 | 0.78 | 0.67 | 5 | Stromal Cells |
| <i>MIR100HG</i>     | 0.47 | 0.00 | 0.00 | 0.26 | 0.05 | 5 | Stromal Cells |
| <i>CXCL12</i>       | 0.46 | 0.00 | 0.00 | 0.48 | 0.22 | 5 | Stromal Cells |
| <i>GLT8D2</i>       | 0.46 | 0.00 | 0.00 | 0.29 | 0.06 | 5 | Stromal Cells |
| <i>MYADM</i>        | 0.46 | 0.00 | 0.00 | 0.51 | 0.37 | 5 | Stromal Cells |
| <i>TGFB1</i>        | 0.46 | 0.00 | 0.00 | 0.51 | 0.35 | 5 | Stromal Cells |
| <i>PPIC</i>         | 0.46 | 0.00 | 0.00 | 0.61 | 0.35 | 5 | Stromal Cells |
| <i>CAMK2N1</i>      | 0.46 | 0.00 | 0.00 | 0.48 | 0.20 | 5 | Stromal Cells |
| <i>LOXL1</i>        | 0.46 | 0.00 | 0.00 | 0.35 | 0.11 | 5 | Stromal Cells |
| <i>CD302</i>        | 0.45 | 0.00 | 0.00 | 0.39 | 0.16 | 5 | Stromal Cells |
| <i>RPL10AP6</i>     | 0.45 | 0.00 | 0.00 | 0.91 | 0.76 | 5 | Stromal Cells |
| <i>GPX3</i>         | 0.45 | 0.00 | 0.00 | 0.67 | 0.43 | 5 | Stromal Cells |
| <i>LGALS3</i>       | 0.45 | 0.00 | 0.00 | 0.61 | 0.35 | 5 | Stromal Cells |
| <i>KDELR2</i>       | 0.44 | 0.00 | 0.00 | 0.64 | 0.44 | 5 | Stromal Cells |
| <i>RCN1</i>         | 0.44 | 0.00 | 0.00 | 0.60 | 0.37 | 5 | Stromal Cells |
| <i>MYH10</i>        | 0.44 | 0.00 | 0.00 | 0.55 | 0.25 | 5 | Stromal Cells |
| <i>NFIB</i>         | 0.44 | 0.00 | 0.00 | 0.77 | 0.48 | 5 | Stromal Cells |
| <i>ABCA8</i>        | 0.44 | 0.00 | 0.00 | 0.33 | 0.11 | 5 | Stromal Cells |
| <i>CCDC68</i>       | 0.43 | 0.00 | 0.00 | 0.27 | 0.11 | 5 | Stromal Cells |
| <i>COLEC12</i>      | 0.43 | 0.00 | 0.00 | 0.38 | 0.12 | 5 | Stromal Cells |
| <i>ZFP36L2</i>      | 0.43 | 0.00 | 0.00 | 0.71 | 0.48 | 5 | Stromal Cells |
| <i>LRRRC75A-AS1</i> | 0.43 | 0.00 | 0.00 | 0.97 | 0.86 | 5 | Stromal Cells |
| <i>TSHZ2</i>        | 0.43 | 0.00 | 0.00 | 0.31 | 0.11 | 5 | Stromal Cells |
| <i>TSPAN13</i>      | 0.43 | 0.00 | 0.00 | 0.33 | 0.12 | 5 | Stromal Cells |
| <i>RBMS3</i>        | 0.43 | 0.00 | 0.00 | 0.41 | 0.18 | 5 | Stromal Cells |
| <i>LBH</i>          | 0.42 | 0.00 | 0.00 | 0.59 | 0.39 | 5 | Stromal Cells |
| <i>ST3GAL4</i>      | 0.42 | 0.00 | 0.00 | 0.33 | 0.12 | 5 | Stromal Cells |
| <i>COL13A1</i>      | 0.41 | 0.00 | 0.00 | 0.28 | 0.08 | 5 | Stromal Cells |
| <i>NOVA1</i>        | 0.41 | 0.00 | 0.00 | 0.35 | 0.10 | 5 | Stromal Cells |

|                     |      |      |      |      |      |   |               |
|---------------------|------|------|------|------|------|---|---------------|
| <i>CST3</i>         | 0.41 | 0.00 | 0.00 | 0.84 | 0.57 | 5 | Stromal Cells |
| <i>RPL10A</i>       | 0.41 | 0.00 | 0.00 | 1.00 | 0.96 | 5 | Stromal Cells |
| <i>KCNQ1OT1</i>     | 0.41 | 0.00 | 0.00 | 0.55 | 0.29 | 5 | Stromal Cells |
| <i>TMED3</i>        | 0.4  | 0.00 | 0.00 | 0.35 | 0.13 | 5 | Stromal Cells |
| <i>EMP1</i>         | 0.4  | 0.00 | 0.00 | 0.33 | 0.23 | 5 | Stromal Cells |
| <i>FKBP10</i>       | 0.4  | 0.00 | 0.00 | 0.44 | 0.19 | 5 | Stromal Cells |
| <i>RP11-864N7.2</i> | 0.4  | 0.00 | 0.00 | 0.98 | 0.89 | 5 | Stromal Cells |
| <i>SRPX</i>         | 0.4  | 0.00 | 0.00 | 0.25 | 0.15 | 5 | Stromal Cells |
| <i>COL21A1</i>      | 0.4  | 0.00 | 0.00 | 0.32 | 0.13 | 5 | Stromal Cells |
| <i>NENF</i>         | 0.39 | 0.00 | 0.00 | 0.74 | 0.46 | 5 | Stromal Cells |
| <i>MDFI</i>         | 0.39 | 0.00 | 0.00 | 0.43 | 0.17 | 5 | Stromal Cells |
| <i>IL11RA</i>       | 0.39 | 0.00 | 0.00 | 0.26 | 0.10 | 5 | Stromal Cells |
| <i>NPM1</i>         | 0.39 | 0.00 | 0.00 | 0.97 | 0.87 | 5 | Stromal Cells |
| <i>RAB34</i>        | 0.38 | 0.00 | 0.00 | 0.65 | 0.37 | 5 | Stromal Cells |
| <i>TTC3</i>         | 0.38 | 0.00 | 0.00 | 0.61 | 0.37 | 5 | Stromal Cells |
| <i>RPS12</i>        | 0.38 | 0.00 | 0.00 | 1.00 | 0.99 | 5 | Stromal Cells |
| <i>RPLP0</i>        | 0.38 | 0.00 | 0.00 | 1.00 | 0.92 | 5 | Stromal Cells |
| <i>RHOBTB3</i>      | 0.38 | 0.00 | 0.00 | 0.36 | 0.17 | 5 | Stromal Cells |
| <i>FGFR1</i>        | 0.37 | 0.00 | 0.00 | 0.46 | 0.22 | 5 | Stromal Cells |
| <i>LRRC17</i>       | 0.37 | 0.00 | 0.00 | 0.28 | 0.12 | 5 | Stromal Cells |
| <i>PRDX4</i>        | 0.37 | 0.00 | 0.00 | 0.49 | 0.27 | 5 | Stromal Cells |
| <i>SNHG8</i>        | 0.37 | 0.00 | 0.00 | 0.81 | 0.55 | 5 | Stromal Cells |
| <i>PALLD</i>        | 0.37 | 0.00 | 0.00 | 0.42 | 0.23 | 5 | Stromal Cells |
| <i>GSTM3</i>        | 0.37 | 0.00 | 0.00 | 0.40 | 0.19 | 5 | Stromal Cells |
| <i>RPL7P9</i>       | 0.37 | 0.00 | 0.00 | 0.91 | 0.74 | 5 | Stromal Cells |
| <i>RRBP1</i>        | 0.36 | 0.00 | 0.00 | 0.52 | 0.31 | 5 | Stromal Cells |
| <i>CCBE1</i>        | 0.36 | 0.00 | 0.00 | 0.31 | 0.11 | 5 | Stromal Cells |
| <i>SLC40A1</i>      | 0.36 | 0.00 | 0.00 | 0.45 | 0.25 | 5 | Stromal Cells |
| <i>EEF1A1</i>       | 0.36 | 0.00 | 0.00 | 1.00 | 1.00 | 5 | Stromal Cells |
| <i>CENPV</i>        | 0.36 | 0.00 | 0.00 | 0.37 | 0.16 | 5 | Stromal Cells |
| <i>EEF2</i>         | 0.36 | 0.00 | 0.00 | 0.97 | 0.88 | 5 | Stromal Cells |
| <i>SEPP1</i>        | 0.36 | 0.00 | 0.00 | 0.79 | 0.55 | 5 | Stromal Cells |
| <i>LTBP1</i>        | 0.36 | 0.00 | 0.00 | 0.40 | 0.22 | 5 | Stromal Cells |
| <i>EFEMP2</i>       | 0.36 | 0.00 | 0.00 | 0.62 | 0.35 | 5 | Stromal Cells |
| <i>CNN2</i>         | 0.36 | 0.00 | 0.00 | 0.43 | 0.22 | 5 | Stromal Cells |
| <i>HNRNPA1</i>      | 0.36 | 0.00 | 0.00 | 0.99 | 0.94 | 5 | Stromal Cells |
| <i>PDLIM3</i>       | 0.36 | 0.00 | 0.00 | 0.53 | 0.28 | 5 | Stromal Cells |
| <i>COL5A2</i>       | 0.36 | 0.00 | 0.00 | 0.45 | 0.21 | 5 | Stromal Cells |
| <i>RPL13AP5</i>     | 0.36 | 0.00 | 0.00 | 0.99 | 0.93 | 5 | Stromal Cells |
| <i>TGFB3</i>        | 0.35 | 0.00 | 0.00 | 0.25 | 0.08 | 5 | Stromal Cells |
| <i>FAM3C</i>        | 0.35 | 0.00 | 0.00 | 0.44 | 0.24 | 5 | Stromal Cells |
| <i>LITAF</i>        | 0.35 | 0.00 | 0.00 | 0.75 | 0.44 | 5 | Stromal Cells |

|                     |      |      |      |      |      |   |               |
|---------------------|------|------|------|------|------|---|---------------|
| <i>SERPING1</i>     | 0.35 | 0.00 | 0.00 | 0.61 | 0.38 | 5 | Stromal Cells |
| <i>SELM</i>         | 0.35 | 0.00 | 0.00 | 0.75 | 0.47 | 5 | Stromal Cells |
| <i>ZNF503</i>       | 0.35 | 0.00 | 0.00 | 0.52 | 0.33 | 5 | Stromal Cells |
| <i>TCF21</i>        | 0.34 | 0.00 | 0.00 | 0.55 | 0.29 | 5 | Stromal Cells |
| <i>VIM</i>          | 0.34 | 0.00 | 0.00 | 1.00 | 0.94 | 5 | Stromal Cells |
| <i>FAM46A</i>       | 0.34 | 0.00 | 0.00 | 0.30 | 0.12 | 5 | Stromal Cells |
| <i>BEX3</i>         | 0.34 | 0.00 | 0.00 | 0.89 | 0.66 | 5 | Stromal Cells |
| <i>MDK</i>          | 0.34 | 0.00 | 0.00 | 0.73 | 0.52 | 5 | Stromal Cells |
| <i>RPL13A</i>       | 0.34 | 0.00 | 0.00 | 1.00 | 1.00 | 5 | Stromal Cells |
| <i>RPL4</i>         | 0.34 | 0.00 | 0.00 | 0.99 | 0.92 | 5 | Stromal Cells |
| <i>ARF4</i>         | 0.34 | 0.00 | 0.00 | 0.68 | 0.50 | 5 | Stromal Cells |
| <i>MEOX2</i>        | 0.33 | 0.00 | 0.00 | 0.33 | 0.13 | 5 | Stromal Cells |
| <i>CTB-63M22.1</i>  | 0.33 | 0.00 | 0.00 | 0.76 | 0.59 | 5 | Stromal Cells |
| <i>ALDH2</i>        | 0.33 | 0.00 | 0.00 | 0.53 | 0.33 | 5 | Stromal Cells |
| <i>CTSF</i>         | 0.33 | 0.00 | 0.00 | 0.34 | 0.15 | 5 | Stromal Cells |
| <i>FXYP1</i>        | 0.33 | 0.00 | 0.00 | 0.49 | 0.25 | 5 | Stromal Cells |
| <i>LRP1</i>         | 0.33 | 0.00 | 0.00 | 0.37 | 0.17 | 5 | Stromal Cells |
| <i>TNFRSF12A</i>    | 0.33 | 0.00 | 0.00 | 0.27 | 0.16 | 5 | Stromal Cells |
| <i>NREP</i>         | 0.32 | 0.00 | 0.00 | 0.54 | 0.36 | 5 | Stromal Cells |
| <i>ANTXR1</i>       | 0.32 | 0.00 | 0.00 | 0.44 | 0.22 | 5 | Stromal Cells |
| <i>C6orf48</i>      | 0.32 | 0.00 | 0.00 | 0.81 | 0.59 | 5 | Stromal Cells |
| <i>EEF1A1P5</i>     | 0.32 | 0.00 | 0.00 | 0.76 | 0.65 | 5 | Stromal Cells |
| <i>GPX8</i>         | 0.32 | 0.00 | 0.00 | 0.29 | 0.10 | 5 | Stromal Cells |
| <i>RPL17</i>        | 0.32 | 0.00 | 0.00 | 0.94 | 0.87 | 5 | Stromal Cells |
| <i>HOXA3</i>        | 0.32 | 0.00 | 0.00 | 0.26 | 0.11 | 5 | Stromal Cells |
| <i>GAS5</i>         | 0.32 | 0.00 | 0.00 | 0.88 | 0.70 | 5 | Stromal Cells |
| <i>NR2F1-AS1</i>    | 0.32 | 0.00 | 0.00 | 0.29 | 0.10 | 5 | Stromal Cells |
| <i>EID1</i>         | 0.32 | 0.00 | 0.00 | 0.92 | 0.78 | 5 | Stromal Cells |
| <i>RPL15</i>        | 0.32 | 0.00 | 0.00 | 1.00 | 0.99 | 5 | Stromal Cells |
| <i>GOLIM4</i>       | 0.31 | 0.00 | 0.00 | 0.48 | 0.27 | 5 | Stromal Cells |
| <i>MEST</i>         | 0.31 | 0.00 | 0.00 | 0.75 | 0.36 | 5 | Stromal Cells |
| <i>RPLP0P6</i>      | 0.31 | 0.00 | 0.00 | 0.56 | 0.36 | 5 | Stromal Cells |
| <i>MORF4L2</i>      | 0.31 | 0.00 | 0.00 | 0.67 | 0.47 | 5 | Stromal Cells |
| <i>PFN2</i>         | 0.31 | 0.00 | 0.00 | 0.42 | 0.23 | 5 | Stromal Cells |
| <i>TWSG1</i>        | 0.31 | 0.00 | 0.00 | 0.35 | 0.17 | 5 | Stromal Cells |
| <i>RPS8</i>         | 0.3  | 0.00 | 0.00 | 1.00 | 0.99 | 5 | Stromal Cells |
| <i>TUBB2A</i>       | 0.3  | 0.00 | 0.00 | 0.27 | 0.16 | 5 | Stromal Cells |
| <i>RP11-36C20.1</i> | 0.3  | 0.00 | 0.00 | 0.63 | 0.45 | 5 | Stromal Cells |
| <i>RCN2</i>         | 0.3  | 0.00 | 0.00 | 0.58 | 0.40 | 5 | Stromal Cells |
| <i>EMILIN1</i>      | 0.3  | 0.00 | 0.00 | 0.46 | 0.23 | 5 | Stromal Cells |
| <i>GPX7</i>         | 0.3  | 0.00 | 0.00 | 0.30 | 0.13 | 5 | Stromal Cells |
| <i>HSPB6</i>        | 0.3  | 0.00 | 0.00 | 0.32 | 0.14 | 5 | Stromal Cells |

|                      |      |      |      |      |      |   |               |
|----------------------|------|------|------|------|------|---|---------------|
| <i>RPS4X</i>         | 0.3  | 0.00 | 0.00 | 1.00 | 0.99 | 5 | Stromal Cells |
| <i>EPHX1</i>         | 0.3  | 0.00 | 0.00 | 0.39 | 0.26 | 5 | Stromal Cells |
| <i>EIF3L</i>         | 0.29 | 0.00 | 0.00 | 0.79 | 0.59 | 5 | Stromal Cells |
| <i>ENPP2</i>         | 0.29 | 0.00 | 0.00 | 0.27 | 0.13 | 5 | Stromal Cells |
| <i>PDLIM2</i>        | 0.29 | 0.00 | 0.00 | 0.41 | 0.21 | 5 | Stromal Cells |
| <i>AC016739.2</i>    | 0.29 | 0.00 | 0.00 | 0.97 | 0.91 | 5 | Stromal Cells |
| <i>RPSA</i>          | 0.29 | 0.00 | 0.00 | 0.97 | 0.89 | 5 | Stromal Cells |
| <i>PLAC9</i>         | 0.29 | 0.00 | 0.00 | 0.66 | 0.39 | 5 | Stromal Cells |
| <i>COL27A1</i>       | 0.29 | 0.00 | 0.00 | 0.25 | 0.10 | 5 | Stromal Cells |
| <i>NFIA</i>          | 0.29 | 0.00 | 0.00 | 0.60 | 0.36 | 5 | Stromal Cells |
| <i>AEBP1</i>         | 0.29 | 0.00 | 0.00 | 0.38 | 0.19 | 5 | Stromal Cells |
| <i>RPL5P34</i>       | 0.29 | 0.00 | 0.00 | 0.90 | 0.74 | 5 | Stromal Cells |
| <i>GPC3</i>          | 0.28 | 0.00 | 0.00 | 0.54 | 0.23 | 5 | Stromal Cells |
| <i>FKBP7</i>         | 0.28 | 0.00 | 0.00 | 0.36 | 0.18 | 5 | Stromal Cells |
| <i>KRT10</i>         | 0.28 | 0.00 | 0.00 | 0.54 | 0.39 | 5 | Stromal Cells |
| <i>RP11-12M9.3</i>   | 0.28 | 0.00 | 0.00 | 0.84 | 0.72 | 5 | Stromal Cells |
| <i>RPL3P4</i>        | 0.28 | 0.00 | 0.00 | 0.99 | 0.94 | 5 | Stromal Cells |
| <i>IMPDH2</i>        | 0.28 | 0.00 | 0.00 | 0.59 | 0.39 | 5 | Stromal Cells |
| <i>RPL6</i>          | 0.28 | 0.00 | 0.00 | 1.00 | 0.97 | 5 | Stromal Cells |
| <i>C12orf57</i>      | 0.28 | 0.00 | 0.00 | 0.80 | 0.61 | 5 | Stromal Cells |
| <i>RP11-592N21.1</i> | 0.28 | 0.00 | 0.00 | 0.66 | 0.47 | 5 | Stromal Cells |
| <i>RPL6P27</i>       | 0.28 | 0.00 | 0.00 | 0.75 | 0.65 | 5 | Stromal Cells |
| <i>BZW2</i>          | 0.28 | 0.00 | 0.00 | 0.26 | 0.12 | 5 | Stromal Cells |
| <i>FZD1</i>          | 0.28 | 0.00 | 0.00 | 0.27 | 0.11 | 5 | Stromal Cells |
| <i>FAM127A</i>       | 0.28 | 0.00 | 0.00 | 0.57 | 0.36 | 5 | Stromal Cells |
| <i>RPL5</i>          | 0.28 | 0.00 | 0.00 | 0.99 | 0.96 | 5 | Stromal Cells |
| <i>TMED2</i>         | 0.28 | 0.00 | 0.00 | 0.69 | 0.51 | 5 | Stromal Cells |
| <i>CNN3</i>          | 0.27 | 0.00 | 0.00 | 0.71 | 0.59 | 5 | Stromal Cells |
| <i>SSR2</i>          | 0.27 | 0.00 | 0.00 | 0.85 | 0.71 | 5 | Stromal Cells |
| <i>CKAP4</i>         | 0.27 | 0.00 | 0.00 | 0.33 | 0.18 | 5 | Stromal Cells |
| <i>RP4-614C10.2</i>  | 0.27 | 0.00 | 0.00 | 0.34 | 0.15 | 5 | Stromal Cells |
| <i>EPB41L4A-AS1</i>  | 0.27 | 0.00 | 0.00 | 0.48 | 0.27 | 5 | Stromal Cells |
| <i>EIF4A2</i>        | 0.27 | 0.00 | 0.00 | 0.87 | 0.75 | 5 | Stromal Cells |
| <i>RPL9</i>          | 0.27 | 0.00 | 0.00 | 1.00 | 0.98 | 5 | Stromal Cells |
| <i>PLAGL1</i>        | 0.27 | 0.00 | 0.00 | 0.28 | 0.12 | 5 | Stromal Cells |
| <i>CD63</i>          | 0.27 | 0.00 | 0.00 | 0.97 | 0.90 | 5 | Stromal Cells |
| <i>HNRNPA1P48</i>    | 0.27 | 0.00 | 0.00 | 0.75 | 0.59 | 5 | Stromal Cells |
| <i>KDELRL1</i>       | 0.27 | 0.00 | 0.00 | 0.56 | 0.37 | 5 | Stromal Cells |
| <i>ZFAS1</i>         | 0.26 | 0.00 | 0.00 | 0.75 | 0.58 | 5 | Stromal Cells |
| <i>FN1</i>           | 0.26 | 0.00 | 0.00 | 0.73 | 0.43 | 5 | Stromal Cells |
| <i>ARL1</i>          | 0.26 | 0.00 | 0.00 | 0.47 | 0.28 | 5 | Stromal Cells |

|                      |      |      |      |      |      |   |               |
|----------------------|------|------|------|------|------|---|---------------|
| <i>RPL7AP66</i>      | 0.26 | 0.00 | 0.00 | 0.64 | 0.44 | 5 | Stromal Cells |
| <i>SPRY1</i>         | 0.26 | 0.00 | 0.00 | 0.64 | 0.42 | 5 | Stromal Cells |
| <i>ERCC1</i>         | 0.26 | 0.00 | 0.00 | 0.38 | 0.23 | 5 | Stromal Cells |
| <i>HOXB5</i>         | 0.26 | 0.00 | 0.00 | 0.36 | 0.16 | 5 | Stromal Cells |
| <i>FAM43A</i>        | 0.26 | 0.00 | 0.00 | 0.25 | 0.14 | 5 | Stromal Cells |
| <i>BASP1</i>         | 0.26 | 0.00 | 0.00 | 0.28 | 0.12 | 5 | Stromal Cells |
| <i>RP11-215A21.2</i> | 0.26 | 0.00 | 0.00 | 0.66 | 0.50 | 5 | Stromal Cells |
| <i>FAM114A1</i>      | 0.26 | 0.00 | 0.00 | 0.40 | 0.21 | 5 | Stromal Cells |
| <i>RPS4XP6</i>       | 0.26 | 0.00 | 0.00 | 0.86 | 0.77 | 5 | Stromal Cells |
| <i>OAT</i>           | 0.26 | 0.00 | 0.00 | 0.47 | 0.26 | 5 | Stromal Cells |
| <i>TCEAL7</i>        | 0.25 | 0.00 | 0.00 | 0.28 | 0.12 | 5 | Stromal Cells |
| <i>RPL7</i>          | 0.25 | 0.00 | 0.00 | 1.00 | 0.98 | 5 | Stromal Cells |
| <i>PRSS35</i>        | 1.46 | 0.00 | 0.00 | 0.60 | 0.04 | 6 | Pericytes     |
| <i>THY1</i>          | 1.41 | 0.00 | 0.00 | 0.75 | 0.14 | 6 | Pericytes     |
| <i>AGT</i>           | 1.4  | 0.00 | 0.00 | 0.40 | 0.03 | 6 | Pericytes     |
| <i>ID4</i>           | 1.39 | 0.00 | 0.00 | 0.74 | 0.23 | 6 | Pericytes     |
| <i>COL1A1</i>        | 1.27 | 0.00 | 0.00 | 0.99 | 0.59 | 6 | Pericytes     |
| <i>C2orf40</i>       | 1.23 | 0.00 | 0.00 | 0.62 | 0.13 | 6 | Pericytes     |
| <i>KRT18</i>         | 1.23 | 0.00 | 0.00 | 0.55 | 0.09 | 6 | Pericytes     |
| <i>ELN</i>           | 1.23 | 0.00 | 0.00 | 0.80 | 0.53 | 6 | Pericytes     |
| <i>PLAC9</i>         | 1.17 | 0.00 | 0.00 | 0.88 | 0.38 | 6 | Pericytes     |
| <i>SEMA5A</i>        | 1.16 | 0.00 | 0.00 | 0.55 | 0.10 | 6 | Pericytes     |
| <i>EGFL6</i>         | 1.07 | 0.00 | 0.00 | 0.85 | 0.34 | 6 | Pericytes     |
| <i>IGFBP7</i>        | 1.01 | 0.00 | 0.00 | 0.99 | 0.65 | 6 | Pericytes     |
| <i>OLFML2B</i>       | 1.01 | 0.00 | 0.00 | 0.44 | 0.06 | 6 | Pericytes     |
| <i>SDC2</i>          | 0.99 | 0.00 | 0.00 | 0.85 | 0.42 | 6 | Pericytes     |
| <i>NTRK3</i>         | 0.99 | 0.00 | 0.00 | 0.58 | 0.13 | 6 | Pericytes     |
| <i>BGN</i>           | 0.98 | 0.00 | 0.00 | 0.95 | 0.48 | 6 | Pericytes     |
| <i>TINAGL1</i>       | 0.98 | 0.00 | 0.00 | 0.83 | 0.36 | 6 | Pericytes     |
| <i>SPRY1</i>         | 0.97 | 0.00 | 0.00 | 0.82 | 0.41 | 6 | Pericytes     |
| <i>FST</i>           | 0.95 | 0.00 | 0.00 | 0.28 | 0.01 | 6 | Pericytes     |
| <i>ARHGAP15</i>      | 0.95 | 0.00 | 0.00 | 0.53 | 0.14 | 6 | Pericytes     |
| <i>NOTCH3</i>        | 0.93 | 0.00 | 0.00 | 0.68 | 0.20 | 6 | Pericytes     |
| <i>FOXS1</i>         | 0.92 | 0.00 | 0.00 | 0.53 | 0.13 | 6 | Pericytes     |
| <i>KCNJ8</i>         | 0.91 | 0.00 | 0.00 | 0.50 | 0.13 | 6 | Pericytes     |
| <i>GEM</i>           | 0.91 | 0.00 | 0.00 | 0.43 | 0.13 | 6 | Pericytes     |
| <i>ASPN</i>          | 0.87 | 0.00 | 0.00 | 0.36 | 0.07 | 6 | Pericytes     |
| <i>GPM6B</i>         | 0.85 | 0.00 | 0.00 | 0.67 | 0.27 | 6 | Pericytes     |
| <i>ZEB2</i>          | 0.85 | 0.00 | 0.00 | 0.78 | 0.40 | 6 | Pericytes     |
| <i>GPX3</i>          | 0.84 | 0.00 | 0.00 | 0.75 | 0.42 | 6 | Pericytes     |
| <i>AC018647.3</i>    | 0.82 | 0.00 | 0.00 | 0.27 | 0.02 | 6 | Pericytes     |
| <i>GUCY1A3</i>       | 0.8  | 0.00 | 0.00 | 0.58 | 0.22 | 6 | Pericytes     |

|                 |      |      |      |      |      |   |           |
|-----------------|------|------|------|------|------|---|-----------|
| <i>TIMP1</i>    | 0.8  | 0.00 | 0.00 | 0.82 | 0.77 | 6 | Pericytes |
| <i>ISYNA1</i>   | 0.79 | 0.00 | 0.00 | 0.48 | 0.19 | 6 | Pericytes |
| <i>SLIT3</i>    | 0.79 | 0.00 | 0.00 | 0.48 | 0.16 | 6 | Pericytes |
| <i>COL1A2</i>   | 0.77 | 0.00 | 0.00 | 0.97 | 0.63 | 6 | Pericytes |
| 7-Sep           | 0.77 | 0.00 | 0.00 | 0.91 | 0.70 | 6 | Pericytes |
| <i>NTN4</i>     | 0.76 | 0.00 | 0.00 | 0.30 | 0.04 | 6 | Pericytes |
| <i>HES4</i>     | 0.76 | 0.00 | 0.00 | 0.62 | 0.24 | 6 | Pericytes |
| <i>SPON2</i>    | 0.75 | 0.00 | 0.00 | 0.38 | 0.10 | 6 | Pericytes |
| <i>PRELP</i>    | 0.74 | 0.00 | 0.00 | 0.36 | 0.07 | 6 | Pericytes |
| <i>COL3A1</i>   | 0.74 | 0.00 | 0.00 | 0.89 | 0.57 | 6 | Pericytes |
| <i>EPS8</i>     | 0.74 | 0.00 | 0.00 | 0.37 | 0.09 | 6 | Pericytes |
| <i>SPARC</i>    | 0.73 | 0.00 | 0.00 | 0.99 | 0.84 | 6 | Pericytes |
| <i>TPPP3</i>    | 0.73 | 0.00 | 0.00 | 0.79 | 0.39 | 6 | Pericytes |
| <i>CRISPLD2</i> | 0.7  | 0.00 | 0.00 | 0.47 | 0.22 | 6 | Pericytes |
| <i>HIGD1B</i>   | 0.7  | 0.00 | 0.00 | 0.70 | 0.25 | 6 | Pericytes |
| <i>RGS5</i>     | 0.69 | 0.00 | 0.00 | 0.42 | 0.23 | 6 | Pericytes |
| <i>PELO</i>     | 0.69 | 0.00 | 0.00 | 0.42 | 0.15 | 6 | Pericytes |
| <i>PDGFRB</i>   | 0.69 | 0.00 | 0.00 | 0.80 | 0.36 | 6 | Pericytes |
| <i>IMPA2</i>    | 0.68 | 0.00 | 0.00 | 0.37 | 0.12 | 6 | Pericytes |
| <i>ITGA1</i>    | 0.67 | 0.00 | 0.00 | 0.57 | 0.25 | 6 | Pericytes |
| <i>SYTL2</i>    | 0.67 | 0.00 | 0.00 | 0.37 | 0.09 | 6 | Pericytes |
| <i>LHFP</i>     | 0.67 | 0.00 | 0.00 | 0.79 | 0.44 | 6 | Pericytes |
| <i>GUCY1A2</i>  | 0.67 | 0.00 | 0.00 | 0.44 | 0.12 | 6 | Pericytes |
| <i>HSPB2</i>    | 0.67 | 0.00 | 0.00 | 0.43 | 0.15 | 6 | Pericytes |
| <i>IGFBP5</i>   | 0.67 | 0.00 | 0.00 | 0.52 | 0.28 | 6 | Pericytes |
| <i>INPP4B</i>   | 0.66 | 0.00 | 0.00 | 0.31 | 0.06 | 6 | Pericytes |
| <i>COL14A1</i>  | 0.65 | 0.00 | 0.00 | 0.36 | 0.10 | 6 | Pericytes |
| <i>NR2F2</i>    | 0.65 | 0.00 | 0.00 | 0.63 | 0.33 | 6 | Pericytes |
| <i>TGFBI</i>    | 0.65 | 0.00 | 0.00 | 0.69 | 0.33 | 6 | Pericytes |
| <i>MEST</i>     | 0.63 | 0.00 | 0.00 | 0.71 | 0.36 | 6 | Pericytes |
| <i>PERP</i>     | 0.63 | 0.00 | 0.00 | 0.37 | 0.11 | 6 | Pericytes |
| <i>APOE</i>     | 0.63 | 0.00 | 0.00 | 0.55 | 0.30 | 6 | Pericytes |
| <i>ARID5B</i>   | 0.63 | 0.00 | 0.00 | 0.53 | 0.28 | 6 | Pericytes |
| <i>TIMP3</i>    | 0.62 | 0.00 | 0.00 | 0.75 | 0.54 | 6 | Pericytes |
| <i>MRGPRF</i>   | 0.61 | 0.00 | 0.00 | 0.44 | 0.19 | 6 | Pericytes |
| <i>CPE</i>      | 0.6  | 0.00 | 0.00 | 0.54 | 0.24 | 6 | Pericytes |
| <i>RERG</i>     | 0.6  | 0.00 | 0.00 | 0.37 | 0.13 | 6 | Pericytes |
| <i>HEYL</i>     | 0.6  | 0.00 | 0.00 | 0.35 | 0.12 | 6 | Pericytes |
| <i>REM1</i>     | 0.58 | 0.00 | 0.00 | 0.32 | 0.08 | 6 | Pericytes |
| <i>TCEAL7</i>   | 0.57 | 0.00 | 0.00 | 0.33 | 0.12 | 6 | Pericytes |
| <i>GRK5</i>     | 0.57 | 0.00 | 0.00 | 0.37 | 0.18 | 6 | Pericytes |
| <i>PTK2</i>     | 0.56 | 0.00 | 0.00 | 0.56 | 0.29 | 6 | Pericytes |
| <i>ABCC9</i>    | 0.55 | 0.00 | 0.00 | 0.28 | 0.05 | 6 | Pericytes |

|                     |      |      |      |      |      |   |           |
|---------------------|------|------|------|------|------|---|-----------|
| <i>HOPX</i>         | 0.55 | 0.00 | 0.00 | 0.27 | 0.11 | 6 | Pericytes |
| <i>ID3</i>          | 0.55 | 0.00 | 0.00 | 0.74 | 0.53 | 6 | Pericytes |
| <i>CD59</i>         | 0.54 | 0.00 | 0.00 | 0.83 | 0.59 | 6 | Pericytes |
| <i>GUCY1B3</i>      | 0.53 | 0.00 | 0.00 | 0.37 | 0.13 | 6 | Pericytes |
| <i>ARID5A</i>       | 0.53 | 0.00 | 0.00 | 0.35 | 0.16 | 6 | Pericytes |
| <i>CALD1</i>        | 0.53 | 0.00 | 0.00 | 0.97 | 0.78 | 6 | Pericytes |
| <i>LAMB1</i>        | 0.52 | 0.00 | 0.00 | 0.37 | 0.14 | 6 | Pericytes |
| <i>FILIP1L</i>      | 0.52 | 0.00 | 0.00 | 0.59 | 0.26 | 6 | Pericytes |
| <i>TM4SF1</i>       | 0.52 | 0.00 | 0.00 | 0.69 | 0.38 | 6 | Pericytes |
| <i>NPR3</i>         | 0.51 | 0.00 | 0.00 | 0.25 | 0.08 | 6 | Pericytes |
| <i>MFGE8</i>        | 0.51 | 0.00 | 0.00 | 0.56 | 0.32 | 6 | Pericytes |
| <i>GAS6</i>         | 0.5  | 0.00 | 0.00 | 0.53 | 0.29 | 6 | Pericytes |
| <i>NDRG2</i>        | 0.5  | 0.00 | 0.00 | 0.53 | 0.33 | 6 | Pericytes |
| <i>ENPEP</i>        | 0.5  | 0.00 | 0.00 | 0.28 | 0.08 | 6 | Pericytes |
| <i>CITED2</i>       | 0.49 | 0.00 | 0.00 | 0.36 | 0.23 | 6 | Pericytes |
| <i>FMOD</i>         | 0.49 | 0.00 | 0.00 | 0.29 | 0.09 | 6 | Pericytes |
| <i>VASN</i>         | 0.49 | 0.00 | 0.00 | 0.34 | 0.16 | 6 | Pericytes |
| <i>RP4-614C10.2</i> | 0.49 | 0.00 | 0.00 | 0.34 | 0.15 | 6 | Pericytes |
| <i>CRYAB</i>        | 0.48 | 0.00 | 0.00 | 0.61 | 0.33 | 6 | Pericytes |
| <i>MCAM</i>         | 0.47 | 0.00 | 0.00 | 0.43 | 0.22 | 6 | Pericytes |
| <i>RP11-693N9.2</i> | 0.47 | 0.00 | 0.00 | 0.34 | 0.15 | 6 | Pericytes |
| <i>CALHM2</i>       | 0.47 | 0.00 | 0.00 | 0.26 | 0.11 | 6 | Pericytes |
| <i>MAP1B</i>        | 0.47 | 0.00 | 0.00 | 0.42 | 0.23 | 6 | Pericytes |
| <i>TMEM176A</i>     | 0.47 | 0.00 | 0.00 | 0.27 | 0.12 | 6 | Pericytes |
| <i>C6orf48</i>      | 0.47 | 0.00 | 0.00 | 0.78 | 0.59 | 6 | Pericytes |
| <i>CCDC102B</i>     | 0.46 | 0.00 | 0.00 | 0.28 | 0.10 | 6 | Pericytes |
| <i>ADAMTS9</i>      | 0.46 | 0.00 | 0.00 | 0.26 | 0.13 | 6 | Pericytes |
| <i>CNN3</i>         | 0.46 | 0.00 | 0.00 | 0.79 | 0.58 | 6 | Pericytes |
| <i>C9orf3</i>       | 0.46 | 0.00 | 0.00 | 0.50 | 0.30 | 6 | Pericytes |
| <i>OAZ2</i>         | 0.46 | 0.00 | 0.00 | 0.73 | 0.53 | 6 | Pericytes |
| <i>CCNI</i>         | 0.45 | 0.00 | 0.00 | 0.90 | 0.78 | 6 | Pericytes |
| <i>RRAD</i>         | 0.45 | 0.00 | 0.00 | 0.32 | 0.18 | 6 | Pericytes |
| <i>COL5A1</i>       | 0.44 | 0.00 | 0.00 | 0.40 | 0.22 | 6 | Pericytes |
| <i>HSPA2</i>        | 0.44 | 0.00 | 0.00 | 0.33 | 0.16 | 6 | Pericytes |
| <i>H1FO</i>         | 0.44 | 0.00 | 0.00 | 0.44 | 0.28 | 6 | Pericytes |
| <i>MXRA8</i>        | 0.44 | 0.00 | 0.00 | 0.50 | 0.29 | 6 | Pericytes |
| <i>LRRC32</i>       | 0.43 | 0.00 | 0.00 | 0.28 | 0.12 | 6 | Pericytes |
| <i>PBX1</i>         | 0.43 | 0.00 | 0.00 | 0.40 | 0.27 | 6 | Pericytes |
| <i>SGCE</i>         | 0.43 | 0.00 | 0.00 | 0.38 | 0.20 | 6 | Pericytes |
| <i>AOC3</i>         | 0.42 | 0.00 | 0.00 | 0.51 | 0.33 | 6 | Pericytes |
| <i>COL21A1</i>      | 0.42 | 0.00 | 0.00 | 0.28 | 0.13 | 6 | Pericytes |
| <i>FSTL1</i>        | 0.42 | 0.00 | 0.00 | 0.59 | 0.43 | 6 | Pericytes |

|           |      |      |      |      |      |   |           |
|-----------|------|------|------|------|------|---|-----------|
| 4-Sep     | 0.42 | 0.00 | 0.00 | 0.30 | 0.14 | 6 | Pericytes |
| SRPX      | 0.41 | 0.00 | 0.00 | 0.31 | 0.15 | 6 | Pericytes |
| COX4I2    | 0.41 | 0.00 | 0.00 | 0.56 | 0.25 | 6 | Pericytes |
| CDH6      | 0.41 | 0.00 | 0.00 | 0.26 | 0.11 | 6 | Pericytes |
| LINC00152 | 0.41 | 0.00 | 0.00 | 0.26 | 0.10 | 6 | Pericytes |
| UBE2E2    | 0.4  | 0.00 | 0.00 | 0.32 | 0.17 | 6 | Pericytes |
| ADGRF5    | 0.4  | 0.00 | 0.00 | 0.32 | 0.17 | 6 | Pericytes |
| EBF1      | 0.39 | 0.00 | 0.00 | 0.26 | 0.10 | 6 | Pericytes |
| SERPINI1  | 0.39 | 0.00 | 0.00 | 0.26 | 0.12 | 6 | Pericytes |
| NID1      | 0.39 | 0.00 | 0.00 | 0.39 | 0.21 | 6 | Pericytes |
| AXL       | 0.39 | 0.00 | 0.00 | 0.37 | 0.22 | 6 | Pericytes |
| FXYP1     | 0.39 | 0.00 | 0.00 | 0.44 | 0.26 | 6 | Pericytes |
| CHN1      | 0.39 | 0.00 | 0.00 | 0.50 | 0.25 | 6 | Pericytes |
| PLEKHA4   | 0.38 | 0.00 | 0.00 | 0.27 | 0.13 | 6 | Pericytes |
| CYR61     | 0.38 | 0.00 | 0.01 | 0.32 | 0.23 | 6 | Pericytes |
| TXNIP     | 0.38 | 0.00 | 0.00 | 0.78 | 0.68 | 6 | Pericytes |
| BASP1     | 0.38 | 0.00 | 0.00 | 0.25 | 0.13 | 6 | Pericytes |
| ITM2C     | 0.38 | 0.00 | 0.00 | 0.57 | 0.39 | 6 | Pericytes |
| LTBP2     | 0.37 | 0.00 | 0.00 | 0.26 | 0.13 | 6 | Pericytes |
| TUBA1A    | 0.37 | 0.00 | 0.00 | 0.90 | 0.79 | 6 | Pericytes |
| EEF2      | 0.36 | 0.00 | 0.00 | 0.97 | 0.88 | 6 | Pericytes |
| H2AFJ     | 0.36 | 0.00 | 0.00 | 0.50 | 0.39 | 6 | Pericytes |
| AKAP12    | 0.36 | 0.00 | 0.00 | 0.34 | 0.22 | 6 | Pericytes |
| CALU      | 0.36 | 0.00 | 0.00 | 0.51 | 0.38 | 6 | Pericytes |
| MPRIIP    | 0.35 | 0.00 | 0.00 | 0.34 | 0.20 | 6 | Pericytes |
| CALM2     | 0.35 | 0.00 | 0.00 | 0.98 | 0.90 | 6 | Pericytes |
| FILIP1    | 0.35 | 0.00 | 0.00 | 0.32 | 0.18 | 6 | Pericytes |
| MAP7D3    | 0.35 | 0.00 | 0.00 | 0.28 | 0.15 | 6 | Pericytes |
| ADI1      | 0.35 | 0.00 | 0.00 | 0.36 | 0.26 | 6 | Pericytes |
| PHLDA1    | 0.34 | 0.00 | 0.00 | 0.35 | 0.23 | 6 | Pericytes |
| CAMLG     | 0.34 | 0.00 | 0.00 | 0.46 | 0.34 | 6 | Pericytes |
| MT1E      | 0.34 | 0.00 | 0.00 | 0.38 | 0.23 | 6 | Pericytes |
| TMEM47    | 0.33 | 0.00 | 0.00 | 0.30 | 0.17 | 6 | Pericytes |
| PTMA      | 0.32 | 0.00 | 0.00 | 1.00 | 1.00 | 6 | Pericytes |
| TPM4      | 0.32 | 0.00 | 0.00 | 0.74 | 0.59 | 6 | Pericytes |
| RPL4P4    | 0.32 | 0.00 | 0.00 | 0.46 | 0.35 | 6 | Pericytes |
| MEF2C     | 0.32 | 0.00 | 0.00 | 0.57 | 0.42 | 6 | Pericytes |
| TMEM176B  | 0.32 | 0.00 | 0.00 | 0.30 | 0.17 | 6 | Pericytes |
| NT5DC2    | 0.32 | 0.00 | 0.00 | 0.28 | 0.15 | 6 | Pericytes |
| ITGB1     | 0.32 | 0.00 | 0.00 | 0.72 | 0.63 | 6 | Pericytes |
| EIF3L     | 0.31 | 0.00 | 0.00 | 0.73 | 0.60 | 6 | Pericytes |
| PIK3R1    | 0.31 | 0.00 | 0.00 | 0.26 | 0.16 | 6 | Pericytes |
| H3F3B     | 0.31 | 0.00 | 0.00 | 1.00 | 0.97 | 6 | Pericytes |

|                      |      |      |      |      |      |   |           |
|----------------------|------|------|------|------|------|---|-----------|
| <i>PXDN</i>          | 0.3  | 0.00 | 0.00 | 0.31 | 0.20 | 6 | Pericytes |
| <i>RFTN1</i>         | 0.3  | 0.00 | 0.00 | 0.28 | 0.15 | 6 | Pericytes |
| <i>MID1IP1</i>       | 0.3  | 0.00 | 0.00 | 0.25 | 0.15 | 6 | Pericytes |
| <i>PTMAP5</i>        | 0.3  | 0.00 | 0.00 | 0.76 | 0.69 | 6 | Pericytes |
| <i>RPL3P4</i>        | 0.3  | 0.00 | 0.00 | 0.99 | 0.94 | 6 | Pericytes |
| <i>LURAP1L</i>       | 0.3  | 0.00 | 0.00 | 0.31 | 0.19 | 6 | Pericytes |
| <i>SOD3</i>          | 0.3  | 0.00 | 0.00 | 0.71 | 0.41 | 6 | Pericytes |
| <i>PTMAP2</i>        | 0.3  | 0.00 | 0.00 | 0.68 | 0.61 | 6 | Pericytes |
| <i>PCOLCE</i>        | 0.3  | 0.00 | 0.00 | 0.52 | 0.30 | 6 | Pericytes |
| <i>KANK2</i>         | 0.3  | 0.00 | 0.00 | 0.49 | 0.34 | 6 | Pericytes |
| <i>PMP22</i>         | 0.29 | 0.00 | 0.00 | 0.70 | 0.47 | 6 | Pericytes |
| <i>CBX6</i>          | 0.29 | 0.00 | 0.00 | 0.41 | 0.29 | 6 | Pericytes |
| <i>CCDC80</i>        | 0.29 | 0.00 | 0.00 | 0.42 | 0.22 | 6 | Pericytes |
| <i>ZNF22</i>         | 0.29 | 0.00 | 0.02 | 0.41 | 0.33 | 6 | Pericytes |
| <i>RPL6</i>          | 0.29 | 0.00 | 0.00 | 0.99 | 0.97 | 6 | Pericytes |
| <i>FOXP1</i>         | 0.29 | 0.00 | 0.00 | 0.56 | 0.39 | 6 | Pericytes |
| <i>TCEAL9</i>        | 0.29 | 0.00 | 0.00 | 0.67 | 0.53 | 6 | Pericytes |
| <i>MYO1B</i>         | 0.29 | 0.00 | 0.00 | 0.32 | 0.20 | 6 | Pericytes |
| <i>MRPL32</i>        | 0.29 | 0.00 | 0.01 | 0.32 | 0.23 | 6 | Pericytes |
| <i>SOX4</i>          | 0.29 | 0.00 | 0.00 | 0.86 | 0.75 | 6 | Pericytes |
| <i>RP11-371A22.1</i> | 0.29 | 0.00 | 0.00 | 0.92 | 0.85 | 6 | Pericytes |
| <i>ACTN1</i>         | 0.28 | 0.00 | 0.00 | 0.56 | 0.44 | 6 | Pericytes |
| <i>LASP1</i>         | 0.28 | 0.00 | 0.03 | 0.28 | 0.19 | 6 | Pericytes |
| <i>EEF1A1P5</i>      | 0.28 | 0.00 | 0.00 | 0.75 | 0.65 | 6 | Pericytes |
| <i>SORBS3</i>        | 0.28 | 0.00 | 0.00 | 0.32 | 0.19 | 6 | Pericytes |
| <i>KLF6</i>          | 0.28 | 0.00 | 0.00 | 0.55 | 0.42 | 6 | Pericytes |
| <i>GAS5</i>          | 0.28 | 0.00 | 0.00 | 0.82 | 0.71 | 6 | Pericytes |
| <i>BBX</i>           | 0.27 | 0.00 | 0.00 | 0.39 | 0.30 | 6 | Pericytes |
| <i>PPP1R12A</i>      | 0.27 | 0.00 | 0.00 | 0.59 | 0.46 | 6 | Pericytes |
| <i>EEF1D</i>         | 0.27 | 0.00 | 0.00 | 0.94 | 0.89 | 6 | Pericytes |
| <i>RPL14P1</i>       | 0.27 | 0.00 | 0.00 | 0.66 | 0.57 | 6 | Pericytes |
| <i>GPC3</i>          | 0.27 | 0.00 | 0.00 | 0.50 | 0.24 | 6 | Pericytes |
| <i>RPLP0</i>         | 0.27 | 0.00 | 0.00 | 0.97 | 0.93 | 6 | Pericytes |
| <i>RPL6P27</i>       | 0.27 | 0.00 | 0.00 | 0.72 | 0.65 | 6 | Pericytes |
| <i>RPL14</i>         | 0.27 | 0.00 | 0.00 | 0.99 | 0.95 | 6 | Pericytes |
| <i>EIF2S3</i>        | 0.27 | 0.00 | 0.00 | 0.42 | 0.31 | 6 | Pericytes |
| <i>RPL3</i>          | 0.27 | 0.00 | 0.00 | 1.00 | 0.99 | 6 | Pericytes |
| <i>TPT1</i>          | 0.26 | 0.00 | 0.00 | 0.99 | 0.98 | 6 | Pericytes |
| <i>AP3S1</i>         | 0.26 | 0.00 | 0.01 | 0.41 | 0.31 | 6 | Pericytes |
| <i>BEX3</i>          | 0.26 | 0.00 | 0.00 | 0.77 | 0.67 | 6 | Pericytes |
| <i>LGALS1</i>        | 0.26 | 0.00 | 0.00 | 0.97 | 0.89 | 6 | Pericytes |
| <i>H19</i>           | 0.26 | 0.00 | 0.00 | 0.31 | 0.15 | 6 | Pericytes |

|                 |      |      |      |      |      |   |             |
|-----------------|------|------|------|------|------|---|-------------|
| <i>SPTSSA</i>   | 0.26 | 0.00 | 0.05 | 0.44 | 0.35 | 6 | Pericytes   |
| <i>TPM1</i>     | 0.26 | 0.00 | 0.00 | 0.74 | 0.59 | 6 | Pericytes   |
| <i>EIF4A2</i>   | 0.25 | 0.00 | 0.00 | 0.82 | 0.75 | 6 | Pericytes   |
| <i>EEF1A1</i>   | 0.25 | 0.00 | 0.00 | 1.00 | 1.00 | 6 | Pericytes   |
| 11-Sep          | 0.25 | 0.00 | 0.00 | 0.42 | 0.30 | 6 | Pericytes   |
| <i>FEZ1</i>     | 0.25 | 0.00 | 0.01 | 0.26 | 0.17 | 6 | Pericytes   |
| <i>RPL21</i>    | 0.25 | 0.00 | 0.00 | 1.00 | 0.99 | 6 | Pericytes   |
| <i>PEBP1</i>    | 0.25 | 0.00 | 0.00 | 0.79 | 0.67 | 6 | Pericytes   |
| <i>EZR</i>      | 0.25 | 0.00 | 0.01 | 0.34 | 0.25 | 6 | Pericytes   |
| <i>S100A8</i>   | 4.21 | 0.00 | 0.00 | 0.74 | 0.15 | 7 | Macrophages |
| <i>S100A9</i>   | 3.96 | 0.00 | 0.00 | 0.80 | 0.17 | 7 | Macrophages |
| <i>LYZ</i>      | 3.84 | 0.00 | 0.00 | 0.93 | 0.11 | 7 | Macrophages |
| <i>HLA-DRA</i>  | 3.53 | 0.00 | 0.00 | 0.97 | 0.22 | 7 | Macrophages |
| <i>HLA-DRB1</i> | 3.19 | 0.00 | 0.00 | 0.90 | 0.07 | 7 | Macrophages |
| <i>TYROBP</i>   | 3.12 | 0.00 | 0.00 | 0.97 | 0.08 | 7 | Macrophages |
| <i>HLA-DPA1</i> | 3.07 | 0.00 | 0.00 | 0.86 | 0.12 | 7 | Macrophages |
| <i>HLA-DPB1</i> | 3    | 0.00 | 0.00 | 0.83 | 0.14 | 7 | Macrophages |
| <i>AIF1</i>     | 2.95 | 0.00 | 0.00 | 0.97 | 0.06 | 7 | Macrophages |
| <i>S100A12</i>  | 2.94 | 0.00 | 0.00 | 0.44 | 0.02 | 7 | Macrophages |
| <i>FCER1G</i>   | 2.88 | 0.00 | 0.00 | 0.97 | 0.09 | 7 | Macrophages |
| <i>CD74</i>     | 2.77 | 0.00 | 0.00 | 0.97 | 0.42 | 7 | Macrophages |
| <i>CD14</i>     | 2.75 | 0.00 | 0.00 | 0.79 | 0.06 | 7 | Macrophages |
| <i>SRGN</i>     | 2.59 | 0.00 | 0.00 | 0.97 | 0.18 | 7 | Macrophages |
| <i>TYMP</i>     | 2.48 | 0.00 | 0.00 | 0.94 | 0.11 | 7 | Macrophages |
| <i>IFI30</i>    | 2.47 | 0.00 | 0.00 | 0.90 | 0.02 | 7 | Macrophages |
| <i>FTL</i>      | 2.34 | 0.00 | 0.00 | 1.00 | 0.96 | 7 | Macrophages |
| <i>LST1</i>     | 2.28 | 0.00 | 0.00 | 0.92 | 0.03 | 7 | Macrophages |
| <i>COTL1</i>    | 2.28 | 0.00 | 0.00 | 0.92 | 0.16 | 7 | Macrophages |
| <i>CTSS</i>     | 2.25 | 0.00 | 0.00 | 0.86 | 0.06 | 7 | Macrophages |
| <i>FCN1</i>     | 2.18 | 0.00 | 0.00 | 0.66 | 0.02 | 7 | Macrophages |
| <i>CST3</i>     | 2.13 | 0.00 | 0.00 | 0.99 | 0.57 | 7 | Macrophages |
| <i>SPI1</i>     | 2.1  | 0.00 | 0.00 | 0.92 | 0.02 | 7 | Macrophages |
| <i>FTLP3</i>    | 2.1  | 0.00 | 0.00 | 0.95 | 0.48 | 7 | Macrophages |
| <i>MNDA</i>     | 2.08 | 0.00 | 0.00 | 0.77 | 0.01 | 7 | Macrophages |
| <i>SH3BGRL3</i> | 2.05 | 0.00 | 0.00 | 0.97 | 0.56 | 7 | Macrophages |
| <i>HLA-DQB1</i> | 2.03 | 0.00 | 0.00 | 0.60 | 0.01 | 7 | Macrophages |
| <i>S100A4</i>   | 2.03 | 0.00 | 0.00 | 0.92 | 0.36 | 7 | Macrophages |
| <i>RETN</i>     | 1.93 | 0.00 | 0.00 | 0.42 | 0.01 | 7 | Macrophages |
| <i>MS4A6A</i>   | 1.92 | 0.00 | 0.00 | 0.71 | 0.02 | 7 | Macrophages |
| <i>CYBA</i>     | 1.92 | 0.00 | 0.00 | 0.98 | 0.49 | 7 | Macrophages |
| <i>LAPTM5</i>   | 1.89 | 0.00 | 0.00 | 0.89 | 0.11 | 7 | Macrophages |
| <i>SERPINA1</i> | 1.83 | 0.00 | 0.00 | 0.71 | 0.02 | 7 | Macrophages |
| <i>CD52</i>     | 1.78 | 0.00 | 0.00 | 0.71 | 0.07 | 7 | Macrophages |

|                      |      |      |      |      |      |   |             |
|----------------------|------|------|------|------|------|---|-------------|
| <i>RP11-1143G9.4</i> | 1.71 | 0.00 | 0.00 | 0.44 | 0.03 | 7 | Macrophages |
| <i>UCP2</i>          | 1.7  | 0.00 | 0.00 | 0.81 | 0.08 | 7 | Macrophages |
| <i>CORO1A</i>        | 1.68 | 0.00 | 0.00 | 0.87 | 0.07 | 7 | Macrophages |
| <i>HCST</i>          | 1.65 | 0.00 | 0.00 | 0.87 | 0.04 | 7 | Macrophages |
| <i>C1orf162</i>      | 1.65 | 0.00 | 0.00 | 0.78 | 0.03 | 7 | Macrophages |
| <i>CPVL</i>          | 1.62 | 0.00 | 0.00 | 0.70 | 0.01 | 7 | Macrophages |
| <i>LSP1</i>          | 1.62 | 0.00 | 0.00 | 0.78 | 0.06 | 7 | Macrophages |
| <i>SAT1</i>          | 1.61 | 0.00 | 0.00 | 0.98 | 0.54 | 7 | Macrophages |
| <i>CTSB</i>          | 1.61 | 0.00 | 0.00 | 0.81 | 0.28 | 7 | Macrophages |
| <i>S100A11</i>       | 1.6  | 0.00 | 0.00 | 0.97 | 0.58 | 7 | Macrophages |
| <i>HLA-DMA</i>       | 1.59 | 0.00 | 0.00 | 0.68 | 0.06 | 7 | Macrophages |
| <i>LCP1</i>          | 1.54 | 0.00 | 0.00 | 0.77 | 0.04 | 7 | Macrophages |
| <i>ANXA1</i>         | 1.54 | 0.00 | 0.00 | 0.89 | 0.37 | 7 | Macrophages |
| <i>PSAP</i>          | 1.52 | 0.00 | 0.00 | 0.93 | 0.62 | 7 | Macrophages |
| <i>CD68</i>          | 1.51 | 0.00 | 0.00 | 0.72 | 0.02 | 7 | Macrophages |
| <i>FCGR3A</i>        | 1.49 | 0.00 | 0.00 | 0.45 | 0.03 | 7 | Macrophages |
| <i>MS4A7</i>         | 1.48 | 0.00 | 0.00 | 0.55 | 0.01 | 7 | Macrophages |
| <i>CD53</i>          | 1.45 | 0.00 | 0.00 | 0.80 | 0.05 | 7 | Macrophages |
| <i>STXBP2</i>        | 1.45 | 0.00 | 0.00 | 0.69 | 0.04 | 7 | Macrophages |
| <i>CSTA</i>          | 1.43 | 0.00 | 0.00 | 0.63 | 0.01 | 7 | Macrophages |
| <i>HCK</i>           | 1.43 | 0.00 | 0.00 | 0.73 | 0.01 | 7 | Macrophages |
| <i>VAMP8</i>         | 1.42 | 0.00 | 0.00 | 0.84 | 0.14 | 7 | Macrophages |
| <i>HMOX1</i>         | 1.41 | 0.00 | 0.00 | 0.47 | 0.01 | 7 | Macrophages |
| <i>LINC01272</i>     | 1.4  | 0.00 | 0.00 | 0.44 | 0.01 | 7 | Macrophages |
| <i>FTH1P10</i>       | 1.38 | 0.00 | 0.00 | 0.95 | 0.67 | 7 | Macrophages |
| <i>FTH1</i>          | 1.38 | 0.00 | 0.00 | 1.00 | 0.98 | 7 | Macrophages |
| <i>CFP</i>           | 1.37 | 0.00 | 0.00 | 0.64 | 0.03 | 7 | Macrophages |
| <i>PTPRC</i>         | 1.37 | 0.00 | 0.00 | 0.76 | 0.04 | 7 | Macrophages |
| <i>FGL2</i>          | 1.34 | 0.00 | 0.00 | 0.71 | 0.02 | 7 | Macrophages |
| <i>FCGR2A</i>        | 1.34 | 0.00 | 0.00 | 0.56 | 0.01 | 7 | Macrophages |
| <i>RNASET2</i>       | 1.34 | 0.00 | 0.00 | 0.79 | 0.14 | 7 | Macrophages |
| <i>CLEC10A</i>       | 1.33 | 0.00 | 0.00 | 0.39 | 0.01 | 7 | Macrophages |
| <i>ITGB2</i>         | 1.32 | 0.00 | 0.00 | 0.73 | 0.04 | 7 | Macrophages |
| <i>GPX1</i>          | 1.32 | 0.00 | 0.00 | 0.93 | 0.50 | 7 | Macrophages |
| <i>VCAN</i>          | 1.32 | 0.00 | 0.00 | 0.63 | 0.33 | 7 | Macrophages |
| <i>TIMP1</i>         | 1.31 | 0.00 | 0.00 | 0.96 | 0.76 | 7 | Macrophages |
| <i>LILRA5</i>        | 1.3  | 0.00 | 0.00 | 0.60 | 0.00 | 7 | Macrophages |
| <i>CSF1R</i>         | 1.27 | 0.00 | 0.00 | 0.57 | 0.01 | 7 | Macrophages |
| <i>JAML</i>          | 1.25 | 0.00 | 0.00 | 0.57 | 0.01 | 7 | Macrophages |
| <i>CYBB</i>          | 1.25 | 0.00 | 0.00 | 0.60 | 0.01 | 7 | Macrophages |
| <i>RHOG</i>          | 1.25 | 0.00 | 0.00 | 0.79 | 0.17 | 7 | Macrophages |
| <i>HLA-DQA1</i>      | 1.24 | 0.00 | 0.00 | 0.47 | 0.01 | 7 | Macrophages |

|                 |      |      |      |      |      |   |             |
|-----------------|------|------|------|------|------|---|-------------|
| <i>NEAT1</i>    | 1.24 | 0.00 | 0.00 | 0.94 | 0.62 | 7 | Macrophages |
| <i>CD44</i>     | 1.22 | 0.00 | 0.00 | 0.81 | 0.23 | 7 | Macrophages |
| <i>PYCARD</i>   | 1.22 | 0.00 | 0.00 | 0.71 | 0.11 | 7 | Macrophages |
| <i>ARPC1B</i>   | 1.21 | 0.00 | 0.00 | 0.87 | 0.27 | 7 | Macrophages |
| <i>CRIP1</i>    | 1.2  | 0.00 | 0.00 | 0.82 | 0.51 | 7 | Macrophages |
| <i>LGALS2</i>   | 1.2  | 0.00 | 0.00 | 0.49 | 0.01 | 7 | Macrophages |
| <i>PLAUR</i>    | 1.2  | 0.00 | 0.00 | 0.58 | 0.05 | 7 | Macrophages |
| <i>MPEG1</i>    | 1.18 | 0.00 | 0.00 | 0.61 | 0.01 | 7 | Macrophages |
| <i>PTPN6</i>    | 1.17 | 0.00 | 0.00 | 0.69 | 0.04 | 7 | Macrophages |
| <i>SAMHD1</i>   | 1.17 | 0.00 | 0.00 | 0.72 | 0.10 | 7 | Macrophages |
| <i>DOK2</i>     | 1.17 | 0.00 | 0.00 | 0.61 | 0.02 | 7 | Macrophages |
| <i>PLAC8</i>    | 1.16 | 0.00 | 0.00 | 0.48 | 0.05 | 7 | Macrophages |
| <i>IGSF6</i>    | 1.16 | 0.00 | 0.00 | 0.56 | 0.00 | 7 | Macrophages |
| <i>CTSD</i>     | 1.16 | 0.00 | 0.00 | 0.64 | 0.30 | 7 | Macrophages |
| <i>FOS</i>      | 1.16 | 0.00 | 0.00 | 0.82 | 0.32 | 7 | Macrophages |
| <i>ARHGDIB</i>  | 1.15 | 0.00 | 0.00 | 0.86 | 0.27 | 7 | Macrophages |
| <i>FAM49B</i>   | 1.14 | 0.00 | 0.00 | 0.76 | 0.10 | 7 | Macrophages |
| <i>FCGR1A</i>   | 1.13 | 0.00 | 0.00 | 0.51 | 0.01 | 7 | Macrophages |
| <i>CAPG</i>     | 1.13 | 0.00 | 0.00 | 0.53 | 0.05 | 7 | Macrophages |
| <i>BCL2A1</i>   | 1.12 | 0.00 | 0.00 | 0.50 | 0.01 | 7 | Macrophages |
| <i>LILRB2</i>   | 1.12 | 0.00 | 0.00 | 0.58 | 0.01 | 7 | Macrophages |
| <i>PKM</i>      | 1.12 | 0.00 | 0.00 | 0.87 | 0.44 | 7 | Macrophages |
| <i>NPC2</i>     | 1.12 | 0.00 | 0.00 | 0.91 | 0.47 | 7 | Macrophages |
| <i>CD300A</i>   | 1.11 | 0.00 | 0.00 | 0.58 | 0.02 | 7 | Macrophages |
| <i>NCF2</i>     | 1.09 | 0.00 | 0.00 | 0.61 | 0.01 | 7 | Macrophages |
| <i>HCCL1</i>    | 1.09 | 0.00 | 0.00 | 0.63 | 0.03 | 7 | Macrophages |
| <i>GPR183</i>   | 1.08 | 0.00 | 0.00 | 0.48 | 0.05 | 7 | Macrophages |
| <i>CTSL</i>     | 1.08 | 0.00 | 0.00 | 0.45 | 0.28 | 7 | Macrophages |
| <i>ARPC3</i>    | 1.08 | 0.00 | 0.00 | 0.92 | 0.59 | 7 | Macrophages |
| <i>HLA-DQA2</i> | 1.07 | 0.00 | 0.00 | 0.44 | 0.01 | 7 | Macrophages |
| <i>HLA-DMB</i>  | 1.07 | 0.00 | 0.00 | 0.51 | 0.04 | 7 | Macrophages |
| <i>TPM3</i>     | 1.07 | 0.00 | 0.00 | 0.82 | 0.28 | 7 | Macrophages |
| <i>LRRC25</i>   | 1.06 | 0.00 | 0.00 | 0.55 | 0.00 | 7 | Macrophages |
| <i>CEBPB</i>    | 1.06 | 0.00 | 0.00 | 0.77 | 0.28 | 7 | Macrophages |
| <i>TSPO</i>     | 1.06 | 0.00 | 0.00 | 0.81 | 0.41 | 7 | Macrophages |
| <i>CTSH</i>     | 1.06 | 0.00 | 0.00 | 0.68 | 0.10 | 7 | Macrophages |
| <i>CD48</i>     | 1.05 | 0.00 | 0.00 | 0.56 | 0.03 | 7 | Macrophages |
| <i>EMP3</i>     | 1.05 | 0.00 | 0.00 | 0.93 | 0.57 | 7 | Macrophages |
| <i>KYNU</i>     | 1.05 | 0.00 | 0.00 | 0.54 | 0.01 | 7 | Macrophages |
| <i>FPR1</i>     | 1.03 | 0.00 | 0.00 | 0.49 | 0.01 | 7 | Macrophages |
| <i>SLC16A3</i>  | 1.02 | 0.00 | 0.00 | 0.63 | 0.07 | 7 | Macrophages |
| <i>THEMIS2</i>  | 1.02 | 0.00 | 0.00 | 0.60 | 0.01 | 7 | Macrophages |
| <i>CLIC1</i>    | 1.02 | 0.00 | 0.00 | 0.95 | 0.62 | 7 | Macrophages |

|                 |      |      |      |      |      |   |             |
|-----------------|------|------|------|------|------|---|-------------|
| <i>FGR</i>      | 1.01 | 0.00 | 0.00 | 0.57 | 0.03 | 7 | Macrophages |
| <i>ENO1</i>     | 1.01 | 0.00 | 0.00 | 0.92 | 0.54 | 7 | Macrophages |
| <i>PILRA</i>    | 1    | 0.00 | 0.00 | 0.51 | 0.01 | 7 | Macrophages |
| <i>NAMPT</i>    | 1    | 0.00 | 0.00 | 0.56 | 0.11 | 7 | Macrophages |
| <i>APOBEC3A</i> | 0.99 | 0.00 | 0.00 | 0.26 | 0.01 | 7 | Macrophages |
| <i>ACTB</i>     | 0.98 | 0.00 | 0.00 | 1.00 | 0.99 | 7 | Macrophages |
| <i>C10orf54</i> | 0.97 | 0.00 | 0.00 | 0.70 | 0.17 | 7 | Macrophages |
| <i>S100A10</i>  | 0.97 | 0.00 | 0.00 | 0.88 | 0.64 | 7 | Macrophages |
| <i>CLEC7A</i>   | 0.96 | 0.00 | 0.00 | 0.51 | 0.00 | 7 | Macrophages |
| <i>GMFG</i>     | 0.96 | 0.00 | 0.00 | 0.84 | 0.24 | 7 | Macrophages |
| <i>IL1B</i>     | 0.96 | 0.00 | 0.00 | 0.31 | 0.01 | 7 | Macrophages |
| <i>EFHD2</i>    | 0.96 | 0.00 | 0.00 | 0.63 | 0.08 | 7 | Macrophages |
| <i>LY86</i>     | 0.96 | 0.00 | 0.00 | 0.54 | 0.01 | 7 | Macrophages |
| <i>RAC2</i>     | 0.95 | 0.00 | 0.00 | 0.66 | 0.05 | 7 | Macrophages |
| <i>OAZ1</i>     | 0.95 | 0.00 | 0.00 | 0.97 | 0.84 | 7 | Macrophages |
| <i>PTPRE</i>    | 0.95 | 0.00 | 0.00 | 0.56 | 0.04 | 7 | Macrophages |
| <i>CSTB</i>     | 0.95 | 0.00 | 0.00 | 0.86 | 0.47 | 7 | Macrophages |
| <i>GCA</i>      | 0.95 | 0.00 | 0.00 | 0.56 | 0.08 | 7 | Macrophages |
| <i>MS4A4A</i>   | 0.94 | 0.00 | 0.00 | 0.36 | 0.01 | 7 | Macrophages |
| <i>DUSP1</i>    | 0.94 | 0.00 | 0.00 | 0.84 | 0.39 | 7 | Macrophages |
| <i>ARRB2</i>    | 0.94 | 0.00 | 0.00 | 0.58 | 0.06 | 7 | Macrophages |
| <i>HSPA1B</i>   | 0.93 | 0.00 | 0.00 | 0.85 | 0.35 | 7 | Macrophages |
| <i>BID</i>      | 0.93 | 0.00 | 0.00 | 0.59 | 0.09 | 7 | Macrophages |
| <i>LYN</i>      | 0.92 | 0.00 | 0.00 | 0.58 | 0.06 | 7 | Macrophages |
| <i>GLIPR2</i>   | 0.91 | 0.00 | 0.00 | 0.68 | 0.19 | 7 | Macrophages |
| <i>FERMT3</i>   | 0.91 | 0.00 | 0.00 | 0.57 | 0.03 | 7 | Macrophages |
| <i>GAPDH</i>    | 0.91 | 0.00 | 0.00 | 0.99 | 0.89 | 7 | Macrophages |
| <i>CAP1</i>     | 0.9  | 0.00 | 0.00 | 0.84 | 0.44 | 7 | Macrophages |
| <i>CD86</i>     | 0.89 | 0.00 | 0.00 | 0.48 | 0.01 | 7 | Macrophages |
| <i>PFN1</i>     | 0.89 | 0.00 | 0.00 | 0.98 | 0.85 | 7 | Macrophages |
| <i>TNFSF13B</i> | 0.89 | 0.00 | 0.00 | 0.47 | 0.03 | 7 | Macrophages |
| <i>ZFP36</i>    | 0.88 | 0.00 | 0.00 | 0.78 | 0.28 | 7 | Macrophages |
| <i>GLIPR1</i>   | 0.88 | 0.00 | 0.00 | 0.55 | 0.06 | 7 | Macrophages |
| <i>RGS10</i>    | 0.87 | 0.00 | 0.00 | 0.51 | 0.04 | 7 | Macrophages |
| <i>CTSC</i>     | 0.87 | 0.00 | 0.00 | 0.59 | 0.21 | 7 | Macrophages |
| <i>C4orf48</i>  | 0.87 | 0.00 | 0.00 | 0.67 | 0.11 | 7 | Macrophages |
| <i>MAFB</i>     | 0.86 | 0.00 | 0.00 | 0.66 | 0.22 | 7 | Macrophages |
| <i>FAM26F</i>   | 0.86 | 0.00 | 0.00 | 0.36 | 0.02 | 7 | Macrophages |
| <i>CTSZ</i>     | 0.85 | 0.00 | 0.00 | 0.61 | 0.15 | 7 | Macrophages |
| <i>FYB</i>      | 0.85 | 0.00 | 0.00 | 0.49 | 0.02 | 7 | Macrophages |
| <i>GPSM3</i>    | 0.85 | 0.00 | 0.00 | 0.62 | 0.11 | 7 | Macrophages |
| <i>CD1C</i>     | 0.85 | 0.00 | 0.00 | 0.25 | 0.01 | 7 | Macrophages |
| <i>FTH1P8</i>   | 0.84 | 0.00 | 0.00 | 0.71 | 0.32 | 7 | Macrophages |

|                  |      |      |      |      |      |   |             |
|------------------|------|------|------|------|------|---|-------------|
| <i>TBXAS1</i>    | 0.84 | 0.00 | 0.00 | 0.48 | 0.01 | 7 | Macrophages |
| <i>ACTR3</i>     | 0.84 | 0.00 | 0.00 | 0.77 | 0.32 | 7 | Macrophages |
| <i>LY96</i>      | 0.84 | 0.00 | 0.00 | 0.49 | 0.03 | 7 | Macrophages |
| <i>ABI3</i>      | 0.83 | 0.00 | 0.00 | 0.48 | 0.07 | 7 | Macrophages |
| <i>TNFRSF1B</i>  | 0.83 | 0.00 | 0.00 | 0.47 | 0.04 | 7 | Macrophages |
| <i>BLVRB</i>     | 0.83 | 0.00 | 0.00 | 0.59 | 0.19 | 7 | Macrophages |
| <i>PLEK</i>      | 0.83 | 0.00 | 0.00 | 0.43 | 0.02 | 7 | Macrophages |
| <i>FPR3</i>      | 0.82 | 0.00 | 0.00 | 0.29 | 0.01 | 7 | Macrophages |
| <i>PGK1</i>      | 0.82 | 0.00 | 0.00 | 0.80 | 0.41 | 7 | Macrophages |
| <i>HSPA1A</i>    | 0.82 | 0.00 | 0.00 | 0.92 | 0.62 | 7 | Macrophages |
| <i>PLIN2</i>     | 0.82 | 0.00 | 0.00 | 0.32 | 0.09 | 7 | Macrophages |
| <i>GRN</i>       | 0.82 | 0.00 | 0.00 | 0.80 | 0.38 | 7 | Macrophages |
| <i>FXYS5</i>     | 0.81 | 0.00 | 0.00 | 0.77 | 0.23 | 7 | Macrophages |
| <i>PRELID1</i>   | 0.81 | 0.00 | 0.00 | 0.81 | 0.46 | 7 | Macrophages |
| <i>CD55</i>      | 0.81 | 0.00 | 0.00 | 0.53 | 0.10 | 7 | Macrophages |
| <i>ARPC2</i>     | 0.81 | 0.00 | 0.00 | 0.92 | 0.62 | 7 | Macrophages |
| <i>LIPA</i>      | 0.81 | 0.00 | 0.00 | 0.49 | 0.12 | 7 | Macrophages |
| <i>TREM1</i>     | 0.8  | 0.00 | 0.00 | 0.38 | 0.01 | 7 | Macrophages |
| <i>LINC00152</i> | 0.8  | 0.00 | 0.00 | 0.50 | 0.09 | 7 | Macrophages |
| <i>ABRACL</i>    | 0.8  | 0.00 | 0.00 | 0.57 | 0.10 | 7 | Macrophages |
| <i>CASP1</i>     | 0.8  | 0.00 | 0.00 | 0.56 | 0.10 | 7 | Macrophages |
| <i>RNASE6</i>    | 0.79 | 0.00 | 0.00 | 0.44 | 0.01 | 7 | Macrophages |
| <i>SERPINB1</i>  | 0.79 | 0.00 | 0.00 | 0.60 | 0.17 | 7 | Macrophages |
| <i>MYO1F</i>     | 0.79 | 0.00 | 0.00 | 0.48 | 0.03 | 7 | Macrophages |
| <i>SOD2</i>      | 0.79 | 0.00 | 0.00 | 0.53 | 0.18 | 7 | Macrophages |
| <i>CD300E</i>    | 0.79 | 0.00 | 0.00 | 0.36 | 0.00 | 7 | Macrophages |
| <i>LILRB3</i>    | 0.79 | 0.00 | 0.00 | 0.48 | 0.01 | 7 | Macrophages |
| <i>AP2S1</i>     | 0.78 | 0.00 | 0.00 | 0.83 | 0.43 | 7 | Macrophages |
| <i>LRRFIP1</i>   | 0.78 | 0.00 | 0.00 | 0.77 | 0.25 | 7 | Macrophages |
| <i>S100A6</i>    | 0.78 | 0.00 | 0.00 | 0.96 | 0.83 | 7 | Macrophages |
| <i>VASP</i>      | 0.78 | 0.00 | 0.00 | 0.68 | 0.24 | 7 | Macrophages |
| <i>CYTIP</i>     | 0.77 | 0.00 | 0.00 | 0.40 | 0.02 | 7 | Macrophages |
| <i>CXCL16</i>    | 0.77 | 0.00 | 0.00 | 0.41 | 0.06 | 7 | Macrophages |
| <i>CKLF</i>      | 0.76 | 0.00 | 0.00 | 0.60 | 0.16 | 7 | Macrophages |
| <i>CCR1</i>      | 0.76 | 0.00 | 0.00 | 0.40 | 0.01 | 7 | Macrophages |
| <i>STAB1</i>     | 0.76 | 0.00 | 0.00 | 0.31 | 0.02 | 7 | Macrophages |
| <i>SLC11A1</i>   | 0.76 | 0.00 | 0.00 | 0.37 | 0.02 | 7 | Macrophages |
| <i>ATP6V0B</i>   | 0.76 | 0.00 | 0.00 | 0.77 | 0.36 | 7 | Macrophages |
| <i>WAS</i>       | 0.76 | 0.00 | 0.00 | 0.46 | 0.01 | 7 | Macrophages |
| <i>GSTO1</i>     | 0.75 | 0.00 | 0.00 | 0.77 | 0.38 | 7 | Macrophages |
| <i>MCL1</i>      | 0.75 | 0.00 | 0.00 | 0.68 | 0.27 | 7 | Macrophages |
| <i>CXCR4</i>     | 0.75 | 0.00 | 0.00 | 0.51 | 0.08 | 7 | Macrophages |
| <i>CPED1</i>     | 0.73 | 0.00 | 0.00 | 0.45 | 0.04 | 7 | Macrophages |

|                      |      |      |      |      |      |   |             |
|----------------------|------|------|------|------|------|---|-------------|
| <i>MOB1A</i>         | 0.73 | 0.00 | 0.00 | 0.64 | 0.17 | 7 | Macrophages |
| <i>CYTH4</i>         | 0.73 | 0.00 | 0.00 | 0.41 | 0.01 | 7 | Macrophages |
| <i>PRR13</i>         | 0.73 | 0.00 | 0.00 | 0.70 | 0.23 | 7 | Macrophages |
| <i>AP1S2</i>         | 0.73 | 0.00 | 0.00 | 0.63 | 0.22 | 7 | Macrophages |
| <i>SAMSN1</i>        | 0.73 | 0.00 | 0.00 | 0.41 | 0.01 | 7 | Macrophages |
| <i>ACTR2</i>         | 0.73 | 0.00 | 0.00 | 0.73 | 0.31 | 7 | Macrophages |
| <i>RGS19</i>         | 0.72 | 0.00 | 0.00 | 0.49 | 0.05 | 7 | Macrophages |
| <i>MT-CO1</i>        | 0.72 | 0.00 | 0.00 | 0.99 | 1.00 | 7 | Macrophages |
| <i>EVI2B</i>         | 0.72 | 0.00 | 0.00 | 0.43 | 0.01 | 7 | Macrophages |
| <i>ATP5E</i>         | 0.72 | 0.00 | 0.00 | 0.99 | 0.87 | 7 | Macrophages |
| <i>MRC1</i>          | 0.71 | 0.00 | 0.00 | 0.27 | 0.01 | 7 | Macrophages |
| <i>PLSCR1</i>        | 0.71 | 0.00 | 0.00 | 0.61 | 0.15 | 7 | Macrophages |
| <i>PARVG</i>         | 0.71 | 0.00 | 0.00 | 0.44 | 0.01 | 7 | Macrophages |
| <i>ASAH1</i>         | 0.71 | 0.00 | 0.00 | 0.66 | 0.27 | 7 | Macrophages |
| <i>LILRB4</i>        | 0.7  | 0.00 | 0.00 | 0.40 | 0.00 | 7 | Macrophages |
| <i>MBOAT7</i>        | 0.7  | 0.00 | 0.00 | 0.48 | 0.08 | 7 | Macrophages |
| <i>SERPINB9</i>      | 0.7  | 0.00 | 0.00 | 0.44 | 0.08 | 7 | Macrophages |
| <i>TMEM176B</i>      | 0.7  | 0.00 | 0.00 | 0.46 | 0.16 | 7 | Macrophages |
| <i>STK17B</i>        | 0.7  | 0.00 | 0.00 | 0.45 | 0.03 | 7 | Macrophages |
| <i>NAPSB</i>         | 0.7  | 0.00 | 0.00 | 0.35 | 0.01 | 7 | Macrophages |
| <i>DUSP6</i>         | 0.69 | 0.00 | 0.00 | 0.59 | 0.17 | 7 | Macrophages |
| <i>C5AR1</i>         | 0.69 | 0.00 | 0.00 | 0.36 | 0.01 | 7 | Macrophages |
| <i>LAIR1</i>         | 0.69 | 0.00 | 0.00 | 0.37 | 0.02 | 7 | Macrophages |
| <i>ARPC4</i>         | 0.69 | 0.00 | 0.00 | 0.72 | 0.32 | 7 | Macrophages |
| <i>VMP1</i>          | 0.69 | 0.00 | 0.00 | 0.68 | 0.25 | 7 | Macrophages |
| <i>LGALS1</i>        | 0.68 | 0.00 | 0.00 | 0.98 | 0.89 | 7 | Macrophages |
| <i>CDC42</i>         | 0.68 | 0.00 | 0.00 | 0.88 | 0.64 | 7 | Macrophages |
| <i>FABP5</i>         | 0.68 | 0.00 | 0.00 | 0.50 | 0.26 | 7 | Macrophages |
| <i>RP11-386I14.4</i> | 0.68 | 0.00 | 0.00 | 0.34 | 0.04 | 7 | Macrophages |
| <i>CD37</i>          | 0.67 | 0.00 | 0.00 | 0.57 | 0.05 | 7 | Macrophages |
| <i>MFSD1</i>         | 0.67 | 0.00 | 0.00 | 0.52 | 0.09 | 7 | Macrophages |
| <i>ANXA2</i>         | 0.67 | 0.00 | 0.00 | 0.90 | 0.64 | 7 | Macrophages |
| <i>RNF149</i>        | 0.67 | 0.00 | 0.00 | 0.48 | 0.09 | 7 | Macrophages |
| <i>PPT1</i>          | 0.67 | 0.00 | 0.00 | 0.59 | 0.22 | 7 | Macrophages |
| <i>PLA2G7</i>        | 0.67 | 0.00 | 0.00 | 0.31 | 0.00 | 7 | Macrophages |
| <i>RGS2</i>          | 0.66 | 0.00 | 0.00 | 0.65 | 0.29 | 7 | Macrophages |
| <i>TPP1</i>          | 0.66 | 0.00 | 0.00 | 0.47 | 0.09 | 7 | Macrophages |
| <i>CFL1</i>          | 0.66 | 0.00 | 0.00 | 0.98 | 0.90 | 7 | Macrophages |
| <i>CAPZA1</i>        | 0.66 | 0.00 | 0.00 | 0.70 | 0.26 | 7 | Macrophages |
| <i>ATP6V0D1</i>      | 0.66 | 0.00 | 0.00 | 0.59 | 0.21 | 7 | Macrophages |
| <i>DBI</i>           | 0.66 | 0.00 | 0.00 | 0.69 | 0.39 | 7 | Macrophages |
| <i>SLC2A3</i>        | 0.65 | 0.00 | 0.00 | 0.43 | 0.16 | 7 | Macrophages |

|                 |      |      |      |      |      |   |             |
|-----------------|------|------|------|------|------|---|-------------|
| <i>TNFAIP2</i>  | 0.65 | 0.00 | 0.00 | 0.31 | 0.03 | 7 | Macrophages |
| <i>AOAH</i>     | 0.65 | 0.00 | 0.00 | 0.40 | 0.01 | 7 | Macrophages |
| <i>SELL</i>     | 0.65 | 0.00 | 0.00 | 0.28 | 0.03 | 7 | Macrophages |
| <i>SLC7A7</i>   | 0.65 | 0.00 | 0.00 | 0.39 | 0.03 | 7 | Macrophages |
| <i>IER5</i>     | 0.65 | 0.00 | 0.00 | 0.42 | 0.10 | 7 | Macrophages |
| <i>LIMD2</i>    | 0.65 | 0.00 | 0.00 | 0.54 | 0.13 | 7 | Macrophages |
| <i>C20orf24</i> | 0.65 | 0.00 | 0.00 | 0.62 | 0.24 | 7 | Macrophages |
| <i>LILRB1</i>   | 0.64 | 0.00 | 0.00 | 0.35 | 0.01 | 7 | Macrophages |
| <i>ALDOA</i>    | 0.64 | 0.00 | 0.00 | 0.91 | 0.69 | 7 | Macrophages |
| <i>FMNL1</i>    | 0.64 | 0.00 | 0.00 | 0.40 | 0.02 | 7 | Macrophages |
| <i>TMEM167A</i> | 0.64 | 0.00 | 0.00 | 0.57 | 0.22 | 7 | Macrophages |
| <i>ATP6V1F</i>  | 0.64 | 0.00 | 0.00 | 0.77 | 0.42 | 7 | Macrophages |
| <i>NOP10</i>    | 0.64 | 0.00 | 0.00 | 0.80 | 0.46 | 7 | Macrophages |
| <i>PSME2</i>    | 0.64 | 0.00 | 0.00 | 0.76 | 0.43 | 7 | Macrophages |
| <i>ADGRE5</i>   | 0.64 | 0.00 | 0.00 | 0.46 | 0.12 | 7 | Macrophages |
| <i>NAGK</i>     | 0.63 | 0.00 | 0.00 | 0.54 | 0.18 | 7 | Macrophages |
| <i>CD36</i>     | 0.63 | 0.00 | 0.00 | 0.51 | 0.13 | 7 | Macrophages |
| <i>SNX10</i>    | 0.63 | 0.00 | 0.00 | 0.33 | 0.01 | 7 | Macrophages |
| <i>TKT</i>      | 0.63 | 0.00 | 0.00 | 0.60 | 0.24 | 7 | Macrophages |
| <i>NCF4</i>     | 0.62 | 0.00 | 0.00 | 0.36 | 0.01 | 7 | Macrophages |
| <i>RNF130</i>   | 0.62 | 0.00 | 0.00 | 0.55 | 0.15 | 7 | Macrophages |
| <i>EVI2A</i>    | 0.62 | 0.00 | 0.00 | 0.40 | 0.01 | 7 | Macrophages |
| <i>ARHGAP30</i> | 0.62 | 0.00 | 0.00 | 0.44 | 0.02 | 7 | Macrophages |
| <i>GLRX</i>     | 0.61 | 0.00 | 0.00 | 0.48 | 0.10 | 7 | Macrophages |
| <i>FCGR1B</i>   | 0.61 | 0.00 | 0.00 | 0.29 | 0.00 | 7 | Macrophages |
| <i>ADAM8</i>    | 0.61 | 0.00 | 0.00 | 0.34 | 0.01 | 7 | Macrophages |
| <i>PLP2</i>     | 0.61 | 0.00 | 0.00 | 0.50 | 0.21 | 7 | Macrophages |
| <i>LAT2</i>     | 0.61 | 0.00 | 0.00 | 0.41 | 0.02 | 7 | Macrophages |
| <i>PLBD1</i>    | 0.6  | 0.00 | 0.00 | 0.38 | 0.04 | 7 | Macrophages |
| <i>ICAM3</i>    | 0.6  | 0.00 | 0.00 | 0.39 | 0.07 | 7 | Macrophages |
| <i>CCL3L3</i>   | 0.6  | 0.00 | 0.00 | 0.27 | 0.01 | 7 | Macrophages |
| <i>FGD2</i>     | 0.6  | 0.00 | 0.00 | 0.31 | 0.01 | 7 | Macrophages |
| <i>CLEC4A</i>   | 0.59 | 0.00 | 0.00 | 0.30 | 0.01 | 7 | Macrophages |
| <i>ARF6</i>     | 0.59 | 0.00 | 0.00 | 0.58 | 0.22 | 7 | Macrophages |
| <i>ASGR1</i>    | 0.59 | 0.00 | 0.00 | 0.30 | 0.02 | 7 | Macrophages |
| <i>LILRA1</i>   | 0.59 | 0.00 | 0.00 | 0.29 | 0.00 | 7 | Macrophages |
| <i>LILRA2</i>   | 0.59 | 0.00 | 0.00 | 0.33 | 0.00 | 7 | Macrophages |
| <i>GABARAP</i>  | 0.59 | 0.00 | 0.00 | 0.78 | 0.38 | 7 | Macrophages |
| <i>LGMN</i>     | 0.58 | 0.00 | 0.00 | 0.30 | 0.19 | 7 | Macrophages |
| <i>IER3</i>     | 0.58 | 0.00 | 0.00 | 0.35 | 0.13 | 7 | Macrophages |
| <i>LPAR6</i>    | 0.58 | 0.00 | 0.00 | 0.42 | 0.11 | 7 | Macrophages |
| <i>NINJ1</i>    | 0.58 | 0.00 | 0.00 | 0.43 | 0.16 | 7 | Macrophages |
| <i>BAZ1A</i>    | 0.58 | 0.00 | 0.00 | 0.57 | 0.17 | 7 | Macrophages |

|                    |      |      |      |      |      |   |             |
|--------------------|------|------|------|------|------|---|-------------|
| <i>FBP1</i>        | 0.57 | 0.00 | 0.00 | 0.31 | 0.03 | 7 | Macrophages |
| <i>PCBP1</i>       | 0.57 | 0.00 | 0.00 | 0.84 | 0.48 | 7 | Macrophages |
| <i>RPL28</i>       | 0.57 | 0.00 | 0.00 | 1.00 | 0.98 | 7 | Macrophages |
| <i>ARPC5</i>       | 0.57 | 0.00 | 0.00 | 0.87 | 0.63 | 7 | Macrophages |
| <i>PSMB10</i>      | 0.57 | 0.00 | 0.00 | 0.62 | 0.23 | 7 | Macrophages |
| <i>RGS18</i>       | 0.57 | 0.00 | 0.00 | 0.34 | 0.00 | 7 | Macrophages |
| <i>RBPJ</i>        | 0.57 | 0.00 | 0.00 | 0.69 | 0.35 | 7 | Macrophages |
| <i>C3AR1</i>       | 0.56 | 0.00 | 0.00 | 0.26 | 0.00 | 7 | Macrophages |
| <i>BLVRA</i>       | 0.56 | 0.00 | 0.00 | 0.49 | 0.15 | 7 | Macrophages |
| <i>ATF5</i>        | 0.56 | 0.00 | 0.00 | 0.32 | 0.05 | 7 | Macrophages |
| <i>DNAJB1</i>      | 0.56 | 0.00 | 0.00 | 0.52 | 0.20 | 7 | Macrophages |
| <i>LCP2</i>        | 0.55 | 0.00 | 0.00 | 0.32 | 0.02 | 7 | Macrophages |
| <i>NUP214</i>      | 0.55 | 0.00 | 0.00 | 0.33 | 0.05 | 7 | Macrophages |
| <i>PPP1CA</i>      | 0.55 | 0.00 | 0.00 | 0.72 | 0.35 | 7 | Macrophages |
| <i>FAM110A</i>     | 0.55 | 0.00 | 0.00 | 0.28 | 0.03 | 7 | Macrophages |
| <i>VPS29</i>       | 0.55 | 0.00 | 0.00 | 0.73 | 0.37 | 7 | Macrophages |
| <i>UBE2D1</i>      | 0.55 | 0.00 | 0.00 | 0.49 | 0.16 | 7 | Macrophages |
| <i>MYO1G</i>       | 0.55 | 0.00 | 0.00 | 0.33 | 0.02 | 7 | Macrophages |
| <i>UPP1</i>        | 0.55 | 0.00 | 0.00 | 0.32 | 0.04 | 7 | Macrophages |
| <i>IL10RA</i>      | 0.55 | 0.00 | 0.00 | 0.34 | 0.01 | 7 | Macrophages |
| <i>GRB2</i>        | 0.55 | 0.00 | 0.00 | 0.57 | 0.17 | 7 | Macrophages |
| <i>RBM47</i>       | 0.55 | 0.00 | 0.00 | 0.34 | 0.01 | 7 | Macrophages |
| <i>TCIRG1</i>      | 0.54 | 0.00 | 0.00 | 0.42 | 0.06 | 7 | Macrophages |
| <i>SNX2</i>        | 0.54 | 0.00 | 0.00 | 0.60 | 0.24 | 7 | Macrophages |
| <i>TALDO1</i>      | 0.54 | 0.00 | 0.00 | 0.70 | 0.36 | 7 | Macrophages |
| <i>NAAA</i>        | 0.54 | 0.00 | 0.00 | 0.36 | 0.06 | 7 | Macrophages |
| <i>IRF8</i>        | 0.54 | 0.00 | 0.00 | 0.34 | 0.03 | 7 | Macrophages |
| <i>MXD1</i>        | 0.54 | 0.00 | 0.00 | 0.31 | 0.02 | 7 | Macrophages |
| <i>YWHAZ</i>       | 0.54 | 0.00 | 0.00 | 0.74 | 0.42 | 7 | Macrophages |
| <i>NCKAP1L</i>     | 0.54 | 0.00 | 0.00 | 0.34 | 0.01 | 7 | Macrophages |
| <i>SDF2L1</i>      | 0.54 | 0.00 | 0.00 | 0.49 | 0.21 | 7 | Macrophages |
| <i>GADD45B</i>     | 0.54 | 0.00 | 0.00 | 0.70 | 0.41 | 7 | Macrophages |
| <i>JUNB</i>        | 0.53 | 0.00 | 0.00 | 0.84 | 0.50 | 7 | Macrophages |
| <i>ALOX5</i>       | 0.53 | 0.00 | 0.00 | 0.34 | 0.01 | 7 | Macrophages |
| <i>GNA15</i>       | 0.53 | 0.00 | 0.00 | 0.28 | 0.00 | 7 | Macrophages |
| <i>PTAFR</i>       | 0.53 | 0.00 | 0.00 | 0.30 | 0.01 | 7 | Macrophages |
| <i>MIR4435-2HG</i> | 0.53 | 0.00 | 0.00 | 0.32 | 0.06 | 7 | Macrophages |
| <i>ATG3</i>        | 0.53 | 0.00 | 0.00 | 0.51 | 0.17 | 7 | Macrophages |
| <i>ATP6V1B2</i>    | 0.52 | 0.00 | 0.00 | 0.43 | 0.11 | 7 | Macrophages |
| <i>OSTF1</i>       | 0.52 | 0.00 | 0.00 | 0.62 | 0.21 | 7 | Macrophages |
| <i>ADM</i>         | 0.52 | 0.00 | 0.00 | 0.28 | 0.07 | 7 | Macrophages |
| <i>TPMT</i>        | 0.52 | 0.00 | 0.00 | 0.37 | 0.06 | 7 | Macrophages |

|                    |      |      |      |      |      |   |             |
|--------------------|------|------|------|------|------|---|-------------|
| <i>C19orf38</i>    | 0.52 | 0.00 | 0.00 | 0.29 | 0.01 | 7 | Macrophages |
| <i>RAP1A</i>       | 0.52 | 0.00 | 0.00 | 0.65 | 0.28 | 7 | Macrophages |
| <i>AC016734.2</i>  | 0.52 | 0.00 | 0.00 | 0.46 | 0.12 | 7 | Macrophages |
| <i>KCNK6</i>       | 0.52 | 0.00 | 0.00 | 0.36 | 0.05 | 7 | Macrophages |
| <i>PSME2P2</i>     | 0.52 | 0.00 | 0.00 | 0.51 | 0.20 | 7 | Macrophages |
| <i>HLA-B</i>       | 0.51 | 0.00 | 0.00 | 0.95 | 0.52 | 7 | Macrophages |
| <i>MTHFD2</i>      | 0.51 | 0.00 | 0.00 | 0.42 | 0.10 | 7 | Macrophages |
| <i>TWF2</i>        | 0.51 | 0.00 | 0.00 | 0.50 | 0.14 | 7 | Macrophages |
| <i>PID1</i>        | 0.51 | 0.00 | 0.00 | 0.32 | 0.04 | 7 | Macrophages |
| <i>SERF2</i>       | 0.51 | 0.00 | 0.00 | 0.99 | 0.94 | 7 | Macrophages |
| <i>RHOA</i>        | 0.51 | 0.00 | 0.00 | 0.89 | 0.68 | 7 | Macrophages |
| <i>ENTPD1</i>      | 0.51 | 0.00 | 0.00 | 0.41 | 0.12 | 7 | Macrophages |
| <i>DAPP1</i>       | 0.5  | 0.00 | 0.00 | 0.30 | 0.01 | 7 | Macrophages |
| <i>CNPY3</i>       | 0.5  | 0.00 | 0.00 | 0.57 | 0.18 | 7 | Macrophages |
| <i>PAK1</i>        | 0.5  | 0.00 | 0.00 | 0.35 | 0.04 | 7 | Macrophages |
| <i>CCL3</i>        | 0.5  | 0.00 | 0.00 | 0.26 | 0.02 | 7 | Macrophages |
| <i>LGALS3</i>      | 0.5  | 0.00 | 0.00 | 0.65 | 0.35 | 7 | Macrophages |
| <i>LDHA</i>        | 0.5  | 0.00 | 0.00 | 0.80 | 0.57 | 7 | Macrophages |
| <i>IKZF1</i>       | 0.5  | 0.00 | 0.00 | 0.30 | 0.02 | 7 | Macrophages |
| <i>HAVCR2</i>      | 0.5  | 0.00 | 0.00 | 0.29 | 0.01 | 7 | Macrophages |
| <i>RAB10</i>       | 0.5  | 0.00 | 0.00 | 0.56 | 0.25 | 7 | Macrophages |
| <i>RP4-765C7.2</i> | 0.5  | 0.00 | 0.00 | 0.86 | 0.49 | 7 | Macrophages |
| <i>HLA-DRB6</i>    | 0.49 | 0.00 | 0.00 | 0.28 | 0.01 | 7 | Macrophages |
| <i>LGALS9</i>      | 0.49 | 0.00 | 0.00 | 0.42 | 0.08 | 7 | Macrophages |
| <i>RASSF4</i>      | 0.49 | 0.00 | 0.00 | 0.29 | 0.02 | 7 | Macrophages |
| <i>SDCBP</i>       | 0.49 | 0.00 | 0.00 | 0.76 | 0.51 | 7 | Macrophages |
| <i>MSRB1</i>       | 0.49 | 0.00 | 0.00 | 0.33 | 0.08 | 7 | Macrophages |
| <i>TMSB4X</i>      | 0.49 | 0.00 | 0.00 | 1.00 | 1.00 | 7 | Macrophages |
| <i>GK</i>          | 0.49 | 0.00 | 0.00 | 0.29 | 0.02 | 7 | Macrophages |
| <i>ITGAX</i>       | 0.49 | 0.00 | 0.00 | 0.30 | 0.01 | 7 | Macrophages |
| <i>ADGRE2</i>      | 0.48 | 0.00 | 0.00 | 0.28 | 0.00 | 7 | Macrophages |
| <i>TNFAIP8L2</i>   | 0.48 | 0.00 | 0.00 | 0.30 | 0.01 | 7 | Macrophages |
| <i>SCO2</i>        | 0.48 | 0.00 | 0.00 | 0.36 | 0.07 | 7 | Macrophages |
| <i>ATP2B1</i>      | 0.48 | 0.00 | 0.00 | 0.52 | 0.24 | 7 | Macrophages |
| <i>SELPLG</i>      | 0.48 | 0.00 | 0.00 | 0.30 | 0.02 | 7 | Macrophages |
| <i>BIN2</i>        | 0.48 | 0.00 | 0.00 | 0.35 | 0.02 | 7 | Macrophages |
| <i>HSPA8</i>       | 0.48 | 0.00 | 0.00 | 0.75 | 0.59 | 7 | Macrophages |
| <i>PGD</i>         | 0.48 | 0.00 | 0.00 | 0.38 | 0.08 | 7 | Macrophages |
| <i>RUNX3</i>       | 0.48 | 0.00 | 0.00 | 0.28 | 0.02 | 7 | Macrophages |
| <i>RASSF5</i>      | 0.48 | 0.00 | 0.00 | 0.32 | 0.03 | 7 | Macrophages |
| <i>EIF4A1</i>      | 0.48 | 0.00 | 0.00 | 0.62 | 0.27 | 7 | Macrophages |
| <i>MTCO1P12</i>    | 0.48 | 0.00 | 0.00 | 0.66 | 0.29 | 7 | Macrophages |
| <i>STX11</i>       | 0.48 | 0.00 | 0.00 | 0.28 | 0.02 | 7 | Macrophages |

|                     |      |      |      |      |      |   |             |
|---------------------|------|------|------|------|------|---|-------------|
| <i>YWHAH</i>        | 0.48 | 0.00 | 0.00 | 0.55 | 0.35 | 7 | Macrophages |
| <i>IQGAP1</i>       | 0.48 | 0.00 | 0.00 | 0.54 | 0.21 | 7 | Macrophages |
| <i>CD33</i>         | 0.48 | 0.00 | 0.00 | 0.25 | 0.00 | 7 | Macrophages |
| <i>HSP90AA1</i>     | 0.48 | 0.00 | 0.00 | 0.94 | 0.86 | 7 | Macrophages |
| <i>IGFLR1</i>       | 0.47 | 0.00 | 0.00 | 0.30 | 0.01 | 7 | Macrophages |
| <i>H2AFY</i>        | 0.47 | 0.00 | 0.00 | 0.71 | 0.41 | 7 | Macrophages |
| <i>MARC1</i>        | 0.47 | 0.00 | 0.00 | 0.29 | 0.01 | 7 | Macrophages |
| <i>AHR</i>          | 0.47 | 0.00 | 0.00 | 0.42 | 0.11 | 7 | Macrophages |
| <i>NABP1</i>        | 0.47 | 0.00 | 0.00 | 0.39 | 0.09 | 7 | Macrophages |
| <i>GDI2</i>         | 0.47 | 0.00 | 0.00 | 0.69 | 0.44 | 7 | Macrophages |
| <i>CIB1</i>         | 0.47 | 0.00 | 0.00 | 0.66 | 0.32 | 7 | Macrophages |
| <i>GNG5</i>         | 0.47 | 0.00 | 0.00 | 0.80 | 0.51 | 7 | Macrophages |
| <i>SERP1</i>        | 0.47 | 0.00 | 0.00 | 0.76 | 0.44 | 7 | Macrophages |
| <i>DBNL</i>         | 0.47 | 0.00 | 0.00 | 0.60 | 0.27 | 7 | Macrophages |
| <i>BLOC1S1</i>      | 0.46 | 0.00 | 0.00 | 0.63 | 0.33 | 7 | Macrophages |
| <i>RAP2B</i>        | 0.46 | 0.00 | 0.00 | 0.38 | 0.10 | 7 | Macrophages |
| <i>SLA</i>          | 0.46 | 0.00 | 0.00 | 0.29 | 0.02 | 7 | Macrophages |
| <i>MT-CO2</i>       | 0.46 | 0.00 | 0.00 | 0.99 | 0.99 | 7 | Macrophages |
| <i>CECR1</i>        | 0.46 | 0.00 | 0.00 | 0.33 | 0.05 | 7 | Macrophages |
| <i>SLC43A2</i>      | 0.46 | 0.00 | 0.00 | 0.35 | 0.07 | 7 | Macrophages |
| <i>RP11-186B7.4</i> | 0.46 | 0.00 | 0.00 | 0.62 | 0.28 | 7 | Macrophages |
| <i>TNFAIP8</i>      | 0.46 | 0.00 | 0.00 | 0.38 | 0.08 | 7 | Macrophages |
| <i>SLC31A2</i>      | 0.46 | 0.00 | 0.00 | 0.31 | 0.02 | 7 | Macrophages |
| <i>HN1</i>          | 0.46 | 0.00 | 0.00 | 0.53 | 0.17 | 7 | Macrophages |
| <i>BEST1</i>        | 0.46 | 0.00 | 0.00 | 0.36 | 0.09 | 7 | Macrophages |
| <i>CREG1</i>        | 0.45 | 0.00 | 0.00 | 0.42 | 0.17 | 7 | Macrophages |
| <i>FAM49A</i>       | 0.45 | 0.00 | 0.00 | 0.32 | 0.05 | 7 | Macrophages |
| <i>BAX</i>          | 0.45 | 0.00 | 0.00 | 0.56 | 0.22 | 7 | Macrophages |
| <i>SCIMP</i>        | 0.45 | 0.00 | 0.00 | 0.27 | 0.01 | 7 | Macrophages |
| <i>CMTM6</i>        | 0.45 | 0.00 | 0.00 | 0.61 | 0.31 | 7 | Macrophages |
| <i>KLF6</i>         | 0.45 | 0.00 | 0.00 | 0.68 | 0.41 | 7 | Macrophages |
| <i>C9orf72</i>      | 0.45 | 0.00 | 0.00 | 0.27 | 0.03 | 7 | Macrophages |
| <i>SQRDL</i>        | 0.45 | 0.00 | 0.00 | 0.36 | 0.06 | 7 | Macrophages |
| <i>FAM65B</i>       | 0.45 | 0.00 | 0.00 | 0.27 | 0.03 | 7 | Macrophages |
| <i>MCOLN1</i>       | 0.44 | 0.00 | 0.00 | 0.35 | 0.08 | 7 | Macrophages |
| <i>C14orf2</i>      | 0.44 | 0.00 | 0.00 | 0.87 | 0.67 | 7 | Macrophages |
| <i>SYNGR2</i>       | 0.44 | 0.00 | 0.00 | 0.60 | 0.25 | 7 | Macrophages |
| <i>SNHG5</i>        | 0.44 | 0.00 | 0.00 | 0.80 | 0.56 | 7 | Macrophages |
| <i>RBM3</i>         | 0.44 | 0.00 | 0.00 | 0.80 | 0.54 | 7 | Macrophages |
| <i>ADAP2</i>        | 0.44 | 0.00 | 0.00 | 0.31 | 0.05 | 7 | Macrophages |
| <i>OGFRL1</i>       | 0.44 | 0.00 | 0.00 | 0.27 | 0.03 | 7 | Macrophages |
| <i>SUB1</i>         | 0.44 | 0.00 | 0.00 | 0.87 | 0.69 | 7 | Macrophages |

|                      |      |      |      |      |      |   |             |
|----------------------|------|------|------|------|------|---|-------------|
| <i>LAMTOR2</i>       | 0.43 | 0.00 | 0.00 | 0.57 | 0.26 | 7 | Macrophages |
| <i>CTSA</i>          | 0.43 | 0.00 | 0.00 | 0.47 | 0.15 | 7 | Macrophages |
| <i>MGST1</i>         | 0.43 | 0.00 | 0.00 | 0.26 | 0.02 | 7 | Macrophages |
| <i>WARS</i>          | 0.43 | 0.00 | 0.00 | 0.48 | 0.19 | 7 | Macrophages |
| <i>RAB31</i>         | 0.43 | 0.00 | 0.00 | 0.42 | 0.13 | 7 | Macrophages |
| <i>CARD19</i>        | 0.43 | 0.00 | 0.00 | 0.43 | 0.14 | 7 | Macrophages |
| <i>UBA52</i>         | 0.42 | 0.00 | 0.00 | 0.99 | 0.95 | 7 | Macrophages |
| <i>DAZAP2</i>        | 0.42 | 0.00 | 0.00 | 0.73 | 0.40 | 7 | Macrophages |
| <i>SFT2D1</i>        | 0.42 | 0.00 | 0.00 | 0.58 | 0.25 | 7 | Macrophages |
| <i>CCDC109B</i>      | 0.42 | 0.00 | 0.00 | 0.30 | 0.04 | 7 | Macrophages |
| <i>CSK</i>           | 0.42 | 0.00 | 0.00 | 0.36 | 0.07 | 7 | Macrophages |
| <i>B2M</i>           | 0.42 | 0.00 | 0.00 | 1.00 | 0.99 | 7 | Macrophages |
| <i>ODF3B</i>         | 0.42 | 0.00 | 0.00 | 0.29 | 0.03 | 7 | Macrophages |
| <i>DAB2</i>          | 0.42 | 0.00 | 0.00 | 0.26 | 0.11 | 7 | Macrophages |
| <i>GRINA</i>         | 0.42 | 0.00 | 0.00 | 0.47 | 0.20 | 7 | Macrophages |
| <i>UNC93B1</i>       | 0.42 | 0.00 | 0.00 | 0.31 | 0.04 | 7 | Macrophages |
| <i>SIGLEC9</i>       | 0.42 | 0.00 | 0.00 | 0.27 | 0.00 | 7 | Macrophages |
| <i>FTLP2</i>         | 0.42 | 0.00 | 0.00 | 0.27 | 0.02 | 7 | Macrophages |
| <i>TRABD</i>         | 0.42 | 0.00 | 0.00 | 0.39 | 0.12 | 7 | Macrophages |
| <i>LAMTOR4</i>       | 0.42 | 0.00 | 0.00 | 0.77 | 0.47 | 7 | Macrophages |
| <i>CXorf21</i>       | 0.42 | 0.00 | 0.00 | 0.26 | 0.00 | 7 | Macrophages |
| <i>COPE</i>          | 0.42 | 0.00 | 0.00 | 0.78 | 0.49 | 7 | Macrophages |
| <i>MVP</i>           | 0.41 | 0.00 | 0.00 | 0.41 | 0.13 | 7 | Macrophages |
| <i>TPI1</i>          | 0.41 | 0.00 | 0.00 | 0.89 | 0.76 | 7 | Macrophages |
| <i>CCND3</i>         | 0.41 | 0.00 | 0.00 | 0.40 | 0.14 | 7 | Macrophages |
| <i>BTK</i>           | 0.41 | 0.00 | 0.00 | 0.26 | 0.01 | 7 | Macrophages |
| <i>PFDN5</i>         | 0.41 | 0.00 | 0.00 | 0.97 | 0.90 | 7 | Macrophages |
| <i>IFNGR2</i>        | 0.41 | 0.00 | 0.00 | 0.42 | 0.14 | 7 | Macrophages |
| <i>NFKBIZ</i>        | 0.41 | 0.00 | 0.00 | 0.28 | 0.07 | 7 | Macrophages |
| <i>DSE</i>           | 0.41 | 0.00 | 0.00 | 0.31 | 0.06 | 7 | Macrophages |
| <i>IFNAR2</i>        | 0.41 | 0.00 | 0.00 | 0.38 | 0.08 | 7 | Macrophages |
| <i>PPP1R18</i>       | 0.4  | 0.00 | 0.00 | 0.44 | 0.14 | 7 | Macrophages |
| <i>RP11-680H20.1</i> | 0.4  | 0.00 | 0.00 | 0.40 | 0.09 | 7 | Macrophages |
| <i>CORO1B</i>        | 0.4  | 0.00 | 0.00 | 0.47 | 0.19 | 7 | Macrophages |
| <i>ACER3</i>         | 0.4  | 0.00 | 0.00 | 0.32 | 0.05 | 7 | Macrophages |
| <i>SYK</i>           | 0.4  | 0.00 | 0.00 | 0.28 | 0.01 | 7 | Macrophages |
| <i>SHKBP1</i>        | 0.4  | 0.00 | 0.00 | 0.39 | 0.10 | 7 | Macrophages |
| <i>CARD16</i>        | 0.4  | 0.00 | 0.00 | 0.62 | 0.27 | 7 | Macrophages |
| <i>GPR65</i>         | 0.4  | 0.00 | 0.00 | 0.26 | 0.01 | 7 | Macrophages |
| <i>HNMT</i>          | 0.4  | 0.00 | 0.00 | 0.35 | 0.09 | 7 | Macrophages |
| <i>SPCS3</i>         | 0.39 | 0.00 | 0.00 | 0.49 | 0.16 | 7 | Macrophages |
| <i>GLUL</i>          | 0.39 | 0.00 | 0.00 | 0.68 | 0.41 | 7 | Macrophages |

|                 |      |      |      |      |      |   |             |
|-----------------|------|------|------|------|------|---|-------------|
| <i>FCGRT</i>    | 0.39 | 0.00 | 0.00 | 0.81 | 0.55 | 7 | Macrophages |
| <i>EZR</i>      | 0.39 | 0.00 | 0.00 | 0.50 | 0.24 | 7 | Macrophages |
| <i>PPP4C</i>    | 0.39 | 0.00 | 0.00 | 0.63 | 0.34 | 7 | Macrophages |
| <i>PTP4A2</i>   | 0.39 | 0.00 | 0.00 | 0.58 | 0.27 | 7 | Macrophages |
| <i>VPS35</i>    | 0.38 | 0.00 | 0.00 | 0.52 | 0.22 | 7 | Macrophages |
| <i>LYST</i>     | 0.38 | 0.00 | 0.00 | 0.28 | 0.06 | 7 | Macrophages |
| <i>MOB3A</i>    | 0.38 | 0.00 | 0.00 | 0.30 | 0.07 | 7 | Macrophages |
| <i>SASH3</i>    | 0.38 | 0.00 | 0.00 | 0.25 | 0.01 | 7 | Macrophages |
| <i>ERP44</i>    | 0.38 | 0.00 | 0.00 | 0.52 | 0.24 | 7 | Macrophages |
| <i>GNAI2</i>    | 0.37 | 0.00 | 0.00 | 0.70 | 0.33 | 7 | Macrophages |
| <i>TMSB4XP4</i> | 0.37 | 0.00 | 0.00 | 0.63 | 0.34 | 7 | Macrophages |
| <i>PLIN3</i>    | 0.37 | 0.00 | 0.00 | 0.46 | 0.18 | 7 | Macrophages |
| <i>SPINT2</i>   | 0.37 | 0.00 | 0.00 | 0.41 | 0.13 | 7 | Macrophages |
| <i>TMEM176A</i> | 0.36 | 0.00 | 0.00 | 0.29 | 0.12 | 7 | Macrophages |
| <i>SIRPA</i>    | 0.36 | 0.00 | 0.00 | 0.30 | 0.04 | 7 | Macrophages |
| <i>FUOM</i>     | 0.36 | 0.00 | 0.00 | 0.32 | 0.07 | 7 | Macrophages |
| <i>G6PD</i>     | 0.36 | 0.00 | 0.00 | 0.30 | 0.06 | 7 | Macrophages |
| <i>FAM105A</i>  | 0.36 | 0.00 | 0.00 | 0.29 | 0.04 | 7 | Macrophages |
| <i>MKINK1</i>   | 0.36 | 0.00 | 0.00 | 0.33 | 0.09 | 7 | Macrophages |
| <i>LPCAT2</i>   | 0.36 | 0.00 | 0.00 | 0.26 | 0.02 | 7 | Macrophages |
| <i>PGAM1</i>    | 0.35 | 0.00 | 0.00 | 0.69 | 0.51 | 7 | Macrophages |
| <i>RPL22L1</i>  | 0.35 | 0.00 | 0.00 | 0.46 | 0.21 | 7 | Macrophages |
| <i>MPP1</i>     | 0.35 | 0.00 | 0.00 | 0.30 | 0.06 | 7 | Macrophages |
| <i>MYD88</i>    | 0.35 | 0.00 | 0.00 | 0.29 | 0.06 | 7 | Macrophages |
| <i>RB1</i>      | 0.35 | 0.00 | 0.00 | 0.35 | 0.12 | 7 | Macrophages |
| <i>RNF181</i>   | 0.35 | 0.00 | 0.00 | 0.66 | 0.38 | 7 | Macrophages |
| <i>STK10</i>    | 0.35 | 0.00 | 0.00 | 0.29 | 0.05 | 7 | Macrophages |
| <i>RIN3</i>     | 0.35 | 0.00 | 0.00 | 0.26 | 0.05 | 7 | Macrophages |
| <i>CHCHD7</i>   | 0.35 | 0.00 | 0.00 | 0.36 | 0.13 | 7 | Macrophages |
| <i>RILPL2</i>   | 0.35 | 0.00 | 0.00 | 0.40 | 0.14 | 7 | Macrophages |
| <i>ATP5EP2</i>  | 0.34 | 0.00 | 0.00 | 0.32 | 0.10 | 7 | Macrophages |
| <i>PAK2</i>     | 0.34 | 0.00 | 0.00 | 0.48 | 0.18 | 7 | Macrophages |
| <i>SELT</i>     | 0.34 | 0.00 | 0.00 | 0.63 | 0.35 | 7 | Macrophages |
| <i>RAP1B</i>    | 0.34 | 0.00 | 0.00 | 0.56 | 0.32 | 7 | Macrophages |
| <i>IFNGR1</i>   | 0.34 | 0.00 | 0.00 | 0.54 | 0.26 | 7 | Macrophages |
| <i>CD58</i>     | 0.34 | 0.00 | 0.00 | 0.33 | 0.07 | 7 | Macrophages |
| <i>GIMAP4</i>   | 0.34 | 0.00 | 0.00 | 0.47 | 0.17 | 7 | Macrophages |
| <i>HEXB</i>     | 0.34 | 0.00 | 0.00 | 0.42 | 0.18 | 7 | Macrophages |
| <i>TGFB1</i>    | 0.34 | 0.00 | 0.00 | 0.42 | 0.14 | 7 | Macrophages |
| <i>BACH1</i>    | 0.34 | 0.00 | 0.00 | 0.26 | 0.06 | 7 | Macrophages |
| <i>IRF7</i>     | 0.34 | 0.00 | 0.00 | 0.28 | 0.06 | 7 | Macrophages |
| <i>ATP6V0E1</i> | 0.34 | 0.00 | 0.00 | 0.80 | 0.59 | 7 | Macrophages |
| <i>RNH1</i>     | 0.33 | 0.00 | 0.00 | 0.71 | 0.49 | 7 | Macrophages |

|                   |      |      |      |      |      |   |             |
|-------------------|------|------|------|------|------|---|-------------|
| <i>CMTM7</i>      | 0.33 | 0.00 | 0.00 | 0.33 | 0.07 | 7 | Macrophages |
| <i>NFKBIA</i>     | 0.33 | 0.00 | 0.00 | 0.56 | 0.39 | 7 | Macrophages |
| <i>RPL39</i>      | 0.33 | 0.00 | 0.00 | 1.00 | 0.99 | 7 | Macrophages |
| <i>GBP2</i>       | 0.33 | 0.00 | 0.00 | 0.28 | 0.10 | 7 | Macrophages |
| <i>DRAM2</i>      | 0.33 | 0.00 | 0.00 | 0.39 | 0.13 | 7 | Macrophages |
| <i>NANS</i>       | 0.33 | 0.00 | 0.00 | 0.42 | 0.16 | 7 | Macrophages |
| <i>IER2</i>       | 0.33 | 0.00 | 0.00 | 0.71 | 0.45 | 7 | Macrophages |
| <i>MYL12A</i>     | 0.33 | 0.00 | 0.00 | 0.91 | 0.74 | 7 | Macrophages |
| <i>AC016739.2</i> | 0.33 | 0.00 | 0.00 | 0.97 | 0.91 | 7 | Macrophages |
| <i>BLOC1S2</i>    | 0.33 | 0.00 | 0.00 | 0.34 | 0.11 | 7 | Macrophages |
| <i>CREM</i>       | 0.32 | 0.00 | 0.00 | 0.33 | 0.19 | 7 | Macrophages |
| <i>NAGA</i>       | 0.32 | 0.00 | 0.00 | 0.30 | 0.07 | 7 | Macrophages |
| <i>ISG15</i>      | 0.32 | 0.00 | 0.00 | 0.42 | 0.25 | 7 | Macrophages |
| <i>ARHGDIA</i>    | 0.32 | 0.00 | 0.00 | 0.66 | 0.42 | 7 | Macrophages |
| <i>CCDC88A</i>    | 0.32 | 0.00 | 0.00 | 0.38 | 0.13 | 7 | Macrophages |
| <i>CNDP2</i>      | 0.32 | 0.00 | 0.00 | 0.35 | 0.12 | 7 | Macrophages |
| <i>COMMD8</i>     | 0.32 | 0.00 | 0.00 | 0.36 | 0.11 | 7 | Macrophages |
| <i>RAB32</i>      | 0.32 | 0.00 | 0.00 | 0.35 | 0.12 | 7 | Macrophages |
| <i>CDKN1A</i>     | 0.32 | 0.00 | 0.00 | 0.28 | 0.07 | 7 | Macrophages |
| <i>HIGD2A</i>     | 0.32 | 0.00 | 0.00 | 0.62 | 0.35 | 7 | Macrophages |
| <i>SMCO4</i>      | 0.32 | 0.00 | 0.00 | 0.32 | 0.11 | 7 | Macrophages |
| <i>MYO9B</i>      | 0.32 | 0.00 | 0.00 | 0.28 | 0.07 | 7 | Macrophages |
| <i>MAP2K3</i>     | 0.32 | 0.00 | 0.00 | 0.33 | 0.09 | 7 | Macrophages |
| <i>POLD4</i>      | 0.32 | 0.00 | 0.00 | 0.33 | 0.11 | 7 | Macrophages |
| <i>IL2RG</i>      | 0.32 | 0.00 | 0.00 | 0.30 | 0.04 | 7 | Macrophages |
| <i>SSR3</i>       | 0.32 | 0.00 | 0.00 | 0.49 | 0.24 | 7 | Macrophages |
| <i>LACTB</i>      | 0.32 | 0.00 | 0.00 | 0.28 | 0.05 | 7 | Macrophages |
| <i>CAMK1</i>      | 0.31 | 0.00 | 0.00 | 0.36 | 0.14 | 7 | Macrophages |
| <i>UBE2D3</i>     | 0.31 | 0.00 | 0.00 | 0.79 | 0.59 | 7 | Macrophages |
| <i>PSMB3</i>      | 0.31 | 0.00 | 0.00 | 0.80 | 0.52 | 7 | Macrophages |
| <i>M6PR</i>       | 0.31 | 0.00 | 0.00 | 0.47 | 0.21 | 7 | Macrophages |
| <i>TMSB10</i>     | 0.31 | 0.00 | 0.00 | 1.00 | 0.99 | 7 | Macrophages |
| <i>ADPGK</i>      | 0.31 | 0.00 | 0.00 | 0.36 | 0.12 | 7 | Macrophages |
| <i>PICALM</i>     | 0.31 | 0.00 | 0.00 | 0.39 | 0.16 | 7 | Macrophages |
| <i>VMA21</i>      | 0.31 | 0.00 | 0.00 | 0.32 | 0.08 | 7 | Macrophages |
| <i>LTA4H</i>      | 0.31 | 0.00 | 0.00 | 0.40 | 0.20 | 7 | Macrophages |
| <i>RXRA</i>       | 0.31 | 0.00 | 0.00 | 0.26 | 0.07 | 7 | Macrophages |
| <i>HSPH1</i>      | 0.31 | 0.00 | 0.00 | 0.31 | 0.10 | 7 | Macrophages |
| <i>IRF1</i>       | 0.31 | 0.00 | 0.00 | 0.40 | 0.18 | 7 | Macrophages |
| <i>EIF1</i>       | 0.31 | 0.00 | 0.00 | 0.98 | 0.96 | 7 | Macrophages |
| <i>BHLHE40</i>    | 0.31 | 0.00 | 0.00 | 0.28 | 0.08 | 7 | Macrophages |
| <i>FTH1P11</i>    | 0.31 | 0.00 | 0.00 | 0.27 | 0.08 | 7 | Macrophages |
| <i>PNPLA6</i>     | 0.3  | 0.00 | 0.00 | 0.26 | 0.05 | 7 | Macrophages |

|                      |      |      |      |      |      |   |             |
|----------------------|------|------|------|------|------|---|-------------|
| <i>ARHGAP4</i>       | 0.3  | 0.00 | 0.00 | 0.25 | 0.04 | 7 | Macrophages |
| <i>SH3BP2</i>        | 0.3  | 0.00 | 0.00 | 0.29 | 0.08 | 7 | Macrophages |
| <i>GPX4</i>          | 0.3  | 0.00 | 0.00 | 0.75 | 0.56 | 7 | Macrophages |
| <i>YIF1B</i>         | 0.3  | 0.00 | 0.00 | 0.33 | 0.09 | 7 | Macrophages |
| <i>AMD1</i>          | 0.3  | 0.00 | 0.00 | 0.38 | 0.17 | 7 | Macrophages |
| <i>CASP4</i>         | 0.3  | 0.00 | 0.00 | 0.38 | 0.15 | 7 | Macrophages |
| <i>COX5A</i>         | 0.3  | 0.00 | 0.00 | 0.69 | 0.39 | 7 | Macrophages |
| <i>FAM45A</i>        | 0.3  | 0.00 | 0.00 | 0.32 | 0.11 | 7 | Macrophages |
| <i>SGK1</i>          | 0.3  | 0.00 | 0.00 | 0.39 | 0.15 | 7 | Macrophages |
| <i>CDK2AP2</i>       | 0.29 | 0.00 | 0.00 | 0.37 | 0.14 | 7 | Macrophages |
| <i>CD47</i>          | 0.29 | 0.00 | 0.00 | 0.46 | 0.20 | 7 | Macrophages |
| <i>PLEKHO2</i>       | 0.29 | 0.00 | 0.00 | 0.26 | 0.06 | 7 | Macrophages |
| <i>ARL6IP5</i>       | 0.29 | 0.00 | 0.00 | 0.65 | 0.41 | 7 | Macrophages |
| <i>TPT1</i>          | 0.29 | 0.00 | 0.00 | 1.00 | 0.98 | 7 | Macrophages |
| <i>RNF13</i>         | 0.29 | 0.00 | 0.00 | 0.45 | 0.20 | 7 | Macrophages |
| <i>HSPA5</i>         | 0.29 | 0.00 | 0.00 | 0.66 | 0.49 | 7 | Macrophages |
| <i>CHCHD10</i>       | 0.29 | 0.00 | 0.00 | 0.41 | 0.19 | 7 | Macrophages |
| <i>HMGA1</i>         | 0.29 | 0.00 | 0.00 | 0.29 | 0.09 | 7 | Macrophages |
| <i>ATP6AP1</i>       | 0.28 | 0.00 | 0.00 | 0.50 | 0.24 | 7 | Macrophages |
| <i>FAM46A</i>        | 0.28 | 0.00 | 0.00 | 0.29 | 0.13 | 7 | Macrophages |
| <i>CALR</i>          | 0.28 | 0.00 | 0.01 | 0.70 | 0.58 | 7 | Macrophages |
| <i>ACOT9</i>         | 0.28 | 0.00 | 0.00 | 0.33 | 0.11 | 7 | Macrophages |
| <i>CD4</i>           | 0.28 | 0.00 | 0.00 | 0.30 | 0.10 | 7 | Macrophages |
| <i>ADAM10</i>        | 0.28 | 0.00 | 0.00 | 0.28 | 0.11 | 7 | Macrophages |
| <i>CCNL1</i>         | 0.27 | 0.00 | 0.00 | 0.54 | 0.31 | 7 | Macrophages |
| <i>CTD-2666L21.3</i> | 0.27 | 0.00 | 0.00 | 0.52 | 0.24 | 7 | Macrophages |
| <i>TRA2B</i>         | 0.27 | 0.00 | 0.00 | 0.67 | 0.50 | 7 | Macrophages |
| <i>MTMR14</i>        | 0.27 | 0.00 | 0.00 | 0.29 | 0.07 | 7 | Macrophages |
| <i>RPLP1</i>         | 0.27 | 0.00 | 0.00 | 1.00 | 1.00 | 7 | Macrophages |
| <i>AGTRAP</i>        | 0.27 | 0.00 | 0.00 | 0.28 | 0.12 | 7 | Macrophages |
| <i>SRA1</i>          | 0.27 | 0.00 | 0.00 | 0.38 | 0.16 | 7 | Macrophages |
| <i>LSM10</i>         | 0.27 | 0.00 | 0.00 | 0.37 | 0.16 | 7 | Macrophages |
| <i>MGAT1</i>         | 0.27 | 0.00 | 0.00 | 0.45 | 0.24 | 7 | Macrophages |
| <i>ATP1B3</i>        | 0.27 | 0.00 | 0.00 | 0.52 | 0.30 | 7 | Macrophages |
| <i>JUND</i>          | 0.27 | 0.00 | 0.00 | 0.53 | 0.29 | 7 | Macrophages |
| <i>YWHAB</i>         | 0.27 | 0.00 | 0.00 | 0.76 | 0.58 | 7 | Macrophages |
| <i>ENY2</i>          | 0.27 | 0.00 | 0.00 | 0.70 | 0.44 | 7 | Macrophages |
| <i>CTC-479C5.12</i>  | 0.26 | 0.00 | 0.00 | 0.31 | 0.10 | 7 | Macrophages |
| <i>RPS19</i>         | 0.26 | 0.00 | 0.00 | 1.00 | 0.99 | 7 | Macrophages |
| <i>RP3-417G15.1</i>  | 0.26 | 0.00 | 0.00 | 0.90 | 0.76 | 7 | Macrophages |
| <i>RPS14P8</i>       | 0.26 | 0.00 | 0.00 | 0.46 | 0.19 | 7 | Macrophages |
| <i>DRAP1</i>         | 0.26 | 0.00 | 0.00 | 0.70 | 0.49 | 7 | Macrophages |

|                      |      |      |      |      |      |   |                   |
|----------------------|------|------|------|------|------|---|-------------------|
| <i>MT-CO3</i>        | 0.26 | 0.00 | 0.00 | 0.99 | 0.99 | 7 | Macrophages       |
| <i>RPL36A</i>        | 0.26 | 0.00 | 0.00 | 0.97 | 0.91 | 7 | Macrophages       |
| <i>ZFAND5</i>        | 0.26 | 0.00 | 0.00 | 0.50 | 0.26 | 7 | Macrophages       |
| <i>SLC38A2</i>       | 0.26 | 0.00 | 0.00 | 0.44 | 0.24 | 7 | Macrophages       |
| <i>ANP32A</i>        | 0.26 | 0.00 | 0.00 | 0.53 | 0.29 | 7 | Macrophages       |
| <i>MYDGF</i>         | 0.26 | 0.00 | 0.00 | 0.63 | 0.42 | 7 | Macrophages       |
| <i>C17orf62</i>      | 0.26 | 0.00 | 0.00 | 0.33 | 0.14 | 7 | Macrophages       |
| <i>NUP62</i>         | 0.26 | 0.00 | 0.00 | 0.31 | 0.11 | 7 | Macrophages       |
| <i>TGFB1</i>         | 0.26 | 0.00 | 0.00 | 0.59 | 0.34 | 7 | Macrophages       |
| <i>CDC42SE2</i>      | 0.26 | 0.00 | 0.00 | 0.27 | 0.08 | 7 | Macrophages       |
| <i>COX6B1</i>        | 0.25 | 0.00 | 0.00 | 0.85 | 0.71 | 7 | Macrophages       |
| <i>LSM6</i>          | 0.25 | 0.00 | 0.00 | 0.47 | 0.24 | 7 | Macrophages       |
| <i>CISD2</i>         | 0.25 | 0.00 | 0.00 | 0.32 | 0.14 | 7 | Macrophages       |
| <i>LAP3</i>          | 0.25 | 0.00 | 0.00 | 0.43 | 0.21 | 7 | Macrophages       |
| <i>RP11-466H18.1</i> | 0.25 | 0.00 | 0.00 | 0.91 | 0.76 | 7 | Macrophages       |
| <i>PLEKHB2</i>       | 0.25 | 0.00 | 0.00 | 0.30 | 0.12 | 7 | Macrophages       |
| <i>WIPF1</i>         | 0.25 | 0.00 | 0.00 | 0.33 | 0.11 | 7 | Macrophages       |
| <i>MAPKAPK3</i>      | 0.25 | 0.00 | 0.00 | 0.31 | 0.09 | 7 | Macrophages       |
| <i>SCPEP1</i>        | 0.25 | 0.00 | 0.00 | 0.28 | 0.12 | 7 | Macrophages       |
| <i>PSMB9</i>         | 0.25 | 0.00 | 0.00 | 0.47 | 0.20 | 7 | Macrophages       |
| <i>UBC</i>           | 0.25 | 0.00 | 0.00 | 0.95 | 0.83 | 7 | Macrophages       |
| <i>HPGD</i>          | 2.76 | 0.00 | 0.00 | 0.98 | 0.18 | 8 | Endothelial Cells |
| <i>S100A3</i>        | 2.44 | 0.00 | 0.00 | 0.87 | 0.07 | 8 | Endothelial Cells |
| <i>HLA-E</i>         | 2.25 | 0.00 | 0.00 | 1.00 | 0.58 | 8 | Endothelial Cells |
| <i>ITM2A</i>         | 2.19 | 0.00 | 0.00 | 0.93 | 0.15 | 8 | Endothelial Cells |
| <i>EMCN</i>          | 2.19 | 0.00 | 0.00 | 0.78 | 0.13 | 8 | Endothelial Cells |
| <i>CLDN5</i>         | 2.13 | 0.00 | 0.00 | 0.96 | 0.23 | 8 | Endothelial Cells |
| <i>SOSTDC1</i>       | 2.03 | 0.00 | 0.00 | 0.61 | 0.11 | 8 | Endothelial Cells |
| <i>IFI27</i>         | 2.02 | 0.00 | 0.00 | 1.00 | 0.33 | 8 | Endothelial Cells |
| <i>IL32</i>          | 2.01 | 0.00 | 0.00 | 0.95 | 0.25 | 8 | Endothelial Cells |
| <i>TSPAN12</i>       | 1.97 | 0.00 | 0.00 | 0.80 | 0.12 | 8 | Endothelial Cells |
| <i>RAMP2</i>         | 1.91 | 0.00 | 0.00 | 0.99 | 0.30 | 8 | Endothelial Cells |
| <i>EDNRB</i>         | 1.8  | 0.00 | 0.00 | 0.88 | 0.23 | 8 | Endothelial Cells |
| <i>HLA-C</i>         | 1.71 | 0.00 | 0.00 | 0.99 | 0.52 | 8 | Endothelial Cells |
| <i>ICAM2</i>         | 1.69 | 0.00 | 0.00 | 0.87 | 0.19 | 8 | Endothelial Cells |
| <i>ITM2B</i>         | 1.68 | 0.00 | 0.00 | 1.00 | 0.88 | 8 | Endothelial Cells |
| <i>HLA-A</i>         | 1.67 | 0.00 | 0.00 | 1.00 | 0.68 | 8 | Endothelial Cells |
| <i>HLA-B</i>         | 1.67 | 0.00 | 0.00 | 0.99 | 0.51 | 8 | Endothelial Cells |
| <i>EGFL7</i>         | 1.64 | 0.00 | 0.00 | 0.93 | 0.22 | 8 | Endothelial Cells |
| <i>APP</i>           | 1.6  | 0.00 | 0.00 | 0.93 | 0.49 | 8 | Endothelial Cells |
| <i>ACE</i>           | 1.6  | 0.00 | 0.00 | 0.78 | 0.10 | 8 | Endothelial Cells |
| <i>S100A4</i>        | 1.59 | 0.00 | 0.00 | 0.94 | 0.36 | 8 | Endothelial Cells |

|                 |      |      |      |      |      |   |                   |
|-----------------|------|------|------|------|------|---|-------------------|
| <i>PECAM1</i>   | 1.59 | 0.00 | 0.00 | 0.93 | 0.22 | 8 | Endothelial Cells |
| <i>TNFSF10</i>  | 1.58 | 0.00 | 0.00 | 0.82 | 0.19 | 8 | Endothelial Cells |
| <i>B2M</i>      | 1.57 | 0.00 | 0.00 | 1.00 | 0.99 | 8 | Endothelial Cells |
| <i>S100A6</i>   | 1.56 | 0.00 | 0.00 | 0.99 | 0.83 | 8 | Endothelial Cells |
| <i>SH3BP5</i>   | 1.53 | 0.00 | 0.00 | 0.81 | 0.18 | 8 | Endothelial Cells |
| <i>GNG11</i>    | 1.52 | 0.00 | 0.00 | 0.97 | 0.41 | 8 | Endothelial Cells |
| <i>BST2</i>     | 1.52 | 0.00 | 0.00 | 0.94 | 0.26 | 8 | Endothelial Cells |
| <i>SDPR</i>     | 1.52 | 0.00 | 0.00 | 0.79 | 0.22 | 8 | Endothelial Cells |
| <i>APLN</i>     | 1.48 | 0.00 | 0.00 | 0.40 | 0.02 | 8 | Endothelial Cells |
| <i>CARD16</i>   | 1.47 | 0.00 | 0.00 | 0.80 | 0.26 | 8 | Endothelial Cells |
| <i>CDH5</i>     | 1.47 | 0.00 | 0.00 | 0.77 | 0.15 | 8 | Endothelial Cells |
| <i>ESAM</i>     | 1.41 | 0.00 | 0.00 | 0.89 | 0.32 | 8 | Endothelial Cells |
| <i>SGK1</i>     | 1.4  | 0.00 | 0.00 | 0.54 | 0.14 | 8 | Endothelial Cells |
| <i>TM4SF1</i>   | 1.36 | 0.00 | 0.00 | 0.87 | 0.37 | 8 | Endothelial Cells |
| <i>ECSCR.1</i>  | 1.36 | 0.00 | 0.00 | 0.77 | 0.16 | 8 | Endothelial Cells |
| <i>FRY</i>      | 1.35 | 0.00 | 0.00 | 0.61 | 0.12 | 8 | Endothelial Cells |
| <i>HSPC324</i>  | 1.33 | 0.00 | 0.00 | 0.45 | 0.04 | 8 | Endothelial Cells |
| <i>SLC9A3R2</i> | 1.31 | 0.00 | 0.00 | 0.82 | 0.38 | 8 | Endothelial Cells |
| <i>C10orf10</i> | 1.3  | 0.00 | 0.00 | 0.54 | 0.14 | 8 | Endothelial Cells |
| <i>CAV2</i>     | 1.29 | 0.00 | 0.00 | 0.93 | 0.56 | 8 | Endothelial Cells |
| <i>CYB5A</i>    | 1.29 | 0.00 | 0.00 | 0.82 | 0.33 | 8 | Endothelial Cells |
| <i>SERPINB6</i> | 1.29 | 0.00 | 0.00 | 0.82 | 0.40 | 8 | Endothelial Cells |
| <i>ACVRL1</i>   | 1.28 | 0.00 | 0.00 | 0.69 | 0.13 | 8 | Endothelial Cells |
| <i>AQP1</i>     | 1.28 | 0.00 | 0.00 | 0.73 | 0.18 | 8 | Endothelial Cells |
| <i>FENDRR</i>   | 1.28 | 0.00 | 0.00 | 0.62 | 0.13 | 8 | Endothelial Cells |
| <i>PRX</i>      | 1.27 | 0.00 | 0.00 | 0.54 | 0.06 | 8 | Endothelial Cells |
| <i>MYZAP</i>    | 1.26 | 0.00 | 0.00 | 0.54 | 0.08 | 8 | Endothelial Cells |
| <i>EMP2</i>     | 1.26 | 0.00 | 0.00 | 0.90 | 0.47 | 8 | Endothelial Cells |
| <i>RAMP3</i>    | 1.24 | 0.00 | 0.00 | 0.69 | 0.13 | 8 | Endothelial Cells |
| <i>MYO6</i>     | 1.24 | 0.00 | 0.00 | 0.54 | 0.12 | 8 | Endothelial Cells |
| <i>CARHSP1</i>  | 1.23 | 0.00 | 0.00 | 0.85 | 0.34 | 8 | Endothelial Cells |
| <i>EPAS1</i>    | 1.21 | 0.00 | 0.00 | 0.88 | 0.41 | 8 | Endothelial Cells |
| <i>BCAM</i>     | 1.21 | 0.00 | 0.00 | 0.79 | 0.31 | 8 | Endothelial Cells |
| <i>HES1</i>     | 1.18 | 0.00 | 0.00 | 0.60 | 0.38 | 8 | Endothelial Cells |
| <i>TSPAN15</i>  | 1.16 | 0.00 | 0.00 | 0.54 | 0.11 | 8 | Endothelial Cells |
| <i>ROBO4</i>    | 1.15 | 0.00 | 0.00 | 0.56 | 0.09 | 8 | Endothelial Cells |
| <i>LY6E</i>     | 1.15 | 0.00 | 0.00 | 0.78 | 0.44 | 8 | Endothelial Cells |
| <i>IFI6</i>     | 1.11 | 0.00 | 0.00 | 0.61 | 0.24 | 8 | Endothelial Cells |
| <i>RAB11A</i>   | 1.11 | 0.00 | 0.00 | 0.80 | 0.43 | 8 | Endothelial Cells |
| <i>TNFRSF4</i>  | 1.09 | 0.00 | 0.00 | 0.41 | 0.06 | 8 | Endothelial Cells |
| <i>GPR146</i>   | 1.09 | 0.00 | 0.00 | 0.44 | 0.07 | 8 | Endothelial Cells |
| <i>PCDH12</i>   | 1.08 | 0.00 | 0.00 | 0.46 | 0.07 | 8 | Endothelial Cells |
| <i>PCDH17</i>   | 1.08 | 0.00 | 0.00 | 0.58 | 0.13 | 8 | Endothelial Cells |

|                 |      |      |      |      |      |   |                   |
|-----------------|------|------|------|------|------|---|-------------------|
| <i>FOXF1</i>    | 1.07 | 0.00 | 0.00 | 0.65 | 0.24 | 8 | Endothelial Cells |
| <i>ISG15</i>    | 1.07 | 0.00 | 0.00 | 0.54 | 0.25 | 8 | Endothelial Cells |
| <i>VAT1</i>     | 1.06 | 0.00 | 0.00 | 0.54 | 0.15 | 8 | Endothelial Cells |
| <i>PCAT19</i>   | 1.05 | 0.00 | 0.00 | 0.68 | 0.16 | 8 | Endothelial Cells |
| <i>ARHGAP29</i> | 1.05 | 0.00 | 0.00 | 0.73 | 0.31 | 8 | Endothelial Cells |
| <i>ADGRL2</i>   | 1.04 | 0.00 | 0.00 | 0.55 | 0.13 | 8 | Endothelial Cells |
| <i>S100A13</i>  | 1.04 | 0.00 | 0.00 | 0.73 | 0.38 | 8 | Endothelial Cells |
| <i>SLCO2A1</i>  | 1.04 | 0.00 | 0.00 | 0.47 | 0.09 | 8 | Endothelial Cells |
| <i>UBE2L6</i>   | 1.03 | 0.00 | 0.00 | 0.58 | 0.23 | 8 | Endothelial Cells |
| <i>RCSD1</i>    | 1.03 | 0.00 | 0.00 | 0.53 | 0.17 | 8 | Endothelial Cells |
| <i>CCDC85B</i>  | 1.03 | 0.00 | 0.00 | 0.75 | 0.39 | 8 | Endothelial Cells |
| <i>SPTBN1</i>   | 1.03 | 0.00 | 0.00 | 0.81 | 0.40 | 8 | Endothelial Cells |
| <i>VIPR1</i>    | 1.02 | 0.00 | 0.00 | 0.40 | 0.03 | 8 | Endothelial Cells |
| <i>KIAA1462</i> | 1.01 | 0.00 | 0.00 | 0.50 | 0.11 | 8 | Endothelial Cells |
| <i>VAMP5</i>    | 1.01 | 0.00 | 0.00 | 0.87 | 0.50 | 8 | Endothelial Cells |
| <i>TMEM123</i>  | 1.01 | 0.00 | 0.00 | 0.71 | 0.36 | 8 | Endothelial Cells |
| <i>C8orf4</i>   | 1.01 | 0.00 | 0.00 | 0.81 | 0.41 | 8 | Endothelial Cells |
| <i>RAPGEF5</i>  | 1    | 0.00 | 0.00 | 0.45 | 0.11 | 8 | Endothelial Cells |
| <i>HSPA12B</i>  | 1    | 0.00 | 0.00 | 0.45 | 0.07 | 8 | Endothelial Cells |
| <i>DUSP6</i>    | 0.99 | 0.00 | 0.00 | 0.53 | 0.17 | 8 | Endothelial Cells |
| <i>STXBP6</i>   | 0.99 | 0.00 | 0.00 | 0.49 | 0.13 | 8 | Endothelial Cells |
| <i>PSME2</i>    | 0.98 | 0.00 | 0.00 | 0.74 | 0.44 | 8 | Endothelial Cells |
| <i>IGFBP4</i>   | 0.98 | 0.00 | 0.00 | 0.94 | 0.48 | 8 | Endothelial Cells |
| <i>APOL3</i>    | 0.98 | 0.00 | 0.00 | 0.45 | 0.10 | 8 | Endothelial Cells |
| <i>TMEM204</i>  | 0.97 | 0.00 | 0.00 | 0.52 | 0.17 | 8 | Endothelial Cells |
| <i>NPDC1</i>    | 0.96 | 0.00 | 0.00 | 0.67 | 0.29 | 8 | Endothelial Cells |
| <i>TSPAN4</i>   | 0.96 | 0.00 | 0.00 | 0.64 | 0.29 | 8 | Endothelial Cells |
| <i>FKBP1A</i>   | 0.95 | 0.00 | 0.00 | 0.94 | 0.71 | 8 | Endothelial Cells |
| <i>TBX3</i>     | 0.95 | 0.00 | 0.00 | 0.61 | 0.28 | 8 | Endothelial Cells |
| <i>IRF1</i>     | 0.95 | 0.00 | 0.00 | 0.43 | 0.18 | 8 | Endothelial Cells |
| <i>PSMB9</i>    | 0.95 | 0.00 | 0.00 | 0.57 | 0.20 | 8 | Endothelial Cells |
| <i>PDLIM1</i>   | 0.94 | 0.00 | 0.00 | 0.65 | 0.38 | 8 | Endothelial Cells |
| <i>TIE1</i>     | 0.94 | 0.00 | 0.00 | 0.55 | 0.12 | 8 | Endothelial Cells |
| <i>KDR</i>      | 0.93 | 0.00 | 0.00 | 0.40 | 0.07 | 8 | Endothelial Cells |
| <i>LEPROTL1</i> | 0.93 | 0.00 | 0.00 | 0.60 | 0.23 | 8 | Endothelial Cells |
| <i>CDKAL1</i>   | 0.92 | 0.00 | 0.00 | 0.36 | 0.06 | 8 | Endothelial Cells |
| <i>PIM3</i>     | 0.92 | 0.00 | 0.00 | 0.47 | 0.16 | 8 | Endothelial Cells |
| <i>GBP4</i>     | 0.92 | 0.00 | 0.00 | 0.33 | 0.09 | 8 | Endothelial Cells |
| <i>RALA</i>     | 0.92 | 0.00 | 0.00 | 0.60 | 0.27 | 8 | Endothelial Cells |
| <i>FXYS5</i>    | 0.92 | 0.00 | 0.00 | 0.59 | 0.25 | 8 | Endothelial Cells |
| <i>ANXA3</i>    | 0.89 | 0.00 | 0.00 | 0.48 | 0.10 | 8 | Endothelial Cells |
| <i>OPTN</i>     | 0.87 | 0.00 | 0.00 | 0.46 | 0.18 | 8 | Endothelial Cells |
| <i>GUK1</i>     | 0.87 | 0.00 | 0.00 | 0.88 | 0.66 | 8 | Endothelial Cells |

|                    |      |      |      |      |      |   |                   |
|--------------------|------|------|------|------|------|---|-------------------|
| <i>GMFG</i>        | 0.86 | 0.00 | 0.00 | 0.68 | 0.26 | 8 | Endothelial Cells |
| <i>APOL1</i>       | 0.86 | 0.00 | 0.00 | 0.34 | 0.08 | 8 | Endothelial Cells |
| <i>GNAI2</i>       | 0.86 | 0.00 | 0.00 | 0.65 | 0.33 | 8 | Endothelial Cells |
| <i>TMEM140</i>     | 0.85 | 0.00 | 0.00 | 0.34 | 0.07 | 8 | Endothelial Cells |
| <i>SYNGR2</i>      | 0.85 | 0.00 | 0.00 | 0.55 | 0.25 | 8 | Endothelial Cells |
| <i>CALCRL</i>      | 0.85 | 0.00 | 0.00 | 0.51 | 0.18 | 8 | Endothelial Cells |
| <i>ERG</i>         | 0.85 | 0.00 | 0.00 | 0.40 | 0.10 | 8 | Endothelial Cells |
| <i>RGS9</i>        | 0.84 | 0.00 | 0.00 | 0.36 | 0.09 | 8 | Endothelial Cells |
| <i>GIMAP4</i>      | 0.83 | 0.00 | 0.00 | 0.56 | 0.17 | 8 | Endothelial Cells |
| <i>ID3</i>         | 0.83 | 0.00 | 0.00 | 0.82 | 0.52 | 8 | Endothelial Cells |
| <i>HLA-F</i>       | 0.82 | 0.00 | 0.00 | 0.39 | 0.12 | 8 | Endothelial Cells |
| <i>PSMB8</i>       | 0.81 | 0.00 | 0.00 | 0.57 | 0.25 | 8 | Endothelial Cells |
| <i>KANK3</i>       | 0.81 | 0.00 | 0.00 | 0.45 | 0.13 | 8 | Endothelial Cells |
| <i>GSDMD</i>       | 0.81 | 0.00 | 0.00 | 0.44 | 0.18 | 8 | Endothelial Cells |
| <i>CFAP20</i>      | 0.8  | 0.00 | 0.00 | 0.46 | 0.25 | 8 | Endothelial Cells |
| <i>CYB561</i>      | 0.8  | 0.00 | 0.00 | 0.32 | 0.05 | 8 | Endothelial Cells |
| <i>RBM17</i>       | 0.8  | 0.00 | 0.00 | 0.54 | 0.36 | 8 | Endothelial Cells |
| <i>FCGRT</i>       | 0.8  | 0.00 | 0.00 | 0.78 | 0.55 | 8 | Endothelial Cells |
| <i>SARAF</i>       | 0.8  | 0.00 | 0.00 | 0.77 | 0.63 | 8 | Endothelial Cells |
| <i>AFAP1L1</i>     | 0.8  | 0.00 | 0.00 | 0.34 | 0.06 | 8 | Endothelial Cells |
| <i>KLF4</i>        | 0.79 | 0.00 | 0.00 | 0.40 | 0.15 | 8 | Endothelial Cells |
| <i>PARP14</i>      | 0.79 | 0.00 | 0.00 | 0.33 | 0.10 | 8 | Endothelial Cells |
| <i>bP-2189O9.2</i> | 0.79 | 0.00 | 0.00 | 0.30 | 0.06 | 8 | Endothelial Cells |
| <i>PSMB10</i>      | 0.79 | 0.00 | 0.00 | 0.49 | 0.24 | 8 | Endothelial Cells |
| <i>DHRS7</i>       | 0.79 | 0.00 | 0.00 | 0.49 | 0.23 | 8 | Endothelial Cells |
| <i>BCL6B</i>       | 0.79 | 0.00 | 0.00 | 0.28 | 0.04 | 8 | Endothelial Cells |
| <i>S100A16</i>     | 0.79 | 0.00 | 0.00 | 0.68 | 0.33 | 8 | Endothelial Cells |
| <i>TAP1</i>        | 0.78 | 0.00 | 0.00 | 0.33 | 0.12 | 8 | Endothelial Cells |
| <i>PSME1</i>       | 0.78 | 0.00 | 0.00 | 0.77 | 0.59 | 8 | Endothelial Cells |
| <i>CAV1</i>        | 0.78 | 0.00 | 0.00 | 0.98 | 0.82 | 8 | Endothelial Cells |
| <i>PSME2P2</i>     | 0.78 | 0.00 | 0.00 | 0.42 | 0.21 | 8 | Endothelial Cells |
| <i>CDH13</i>       | 0.77 | 0.00 | 0.00 | 0.28 | 0.07 | 8 | Endothelial Cells |
| <i>SCHIP1.1</i>    | 0.77 | 0.00 | 0.00 | 0.35 | 0.10 | 8 | Endothelial Cells |
| <i>NRP1</i>        | 0.77 | 0.00 | 0.00 | 0.43 | 0.19 | 8 | Endothelial Cells |
| <i>SASH1</i>       | 0.77 | 0.00 | 0.00 | 0.40 | 0.14 | 8 | Endothelial Cells |
| <i>CD34</i>        | 0.76 | 0.00 | 0.00 | 0.46 | 0.14 | 8 | Endothelial Cells |
| <i>MSN</i>         | 0.76 | 0.00 | 0.00 | 0.71 | 0.46 | 8 | Endothelial Cells |
| <i>ITGA3</i>       | 0.76 | 0.00 | 0.00 | 0.35 | 0.10 | 8 | Endothelial Cells |
| <i>LYL1</i>        | 0.76 | 0.00 | 0.00 | 0.36 | 0.10 | 8 | Endothelial Cells |
| <i>IFITM3</i>      | 0.76 | 0.00 | 0.00 | 0.99 | 0.90 | 8 | Endothelial Cells |
| <i>BTN3A2</i>      | 0.75 | 0.00 | 0.00 | 0.36 | 0.10 | 8 | Endothelial Cells |
| <i>XAF1</i>        | 0.75 | 0.00 | 0.00 | 0.30 | 0.09 | 8 | Endothelial Cells |
| <i>CMTM3</i>       | 0.75 | 0.00 | 0.00 | 0.50 | 0.27 | 8 | Endothelial Cells |

|                     |      |      |      |      |      |   |                   |
|---------------------|------|------|------|------|------|---|-------------------|
| <i>PTRF</i>         | 0.75 | 0.00 | 0.00 | 0.94 | 0.68 | 8 | Endothelial Cells |
| <i>GALNT18</i>      | 0.75 | 0.00 | 0.00 | 0.37 | 0.11 | 8 | Endothelial Cells |
| <i>NRN1</i>         | 0.75 | 0.00 | 0.00 | 0.31 | 0.07 | 8 | Endothelial Cells |
| <i>IFI35</i>        | 0.74 | 0.00 | 0.00 | 0.34 | 0.13 | 8 | Endothelial Cells |
| <i>TAP2</i>         | 0.74 | 0.00 | 0.00 | 0.30 | 0.07 | 8 | Endothelial Cells |
| <i>LAMP1</i>        | 0.74 | 0.00 | 0.00 | 0.65 | 0.43 | 8 | Endothelial Cells |
| <i>LDB2</i>         | 0.74 | 0.00 | 0.00 | 0.48 | 0.17 | 8 | Endothelial Cells |
| <i>BSG</i>          | 0.74 | 0.00 | 0.00 | 0.78 | 0.65 | 8 | Endothelial Cells |
| <i>TNFRSF14</i>     | 0.74 | 0.00 | 0.00 | 0.34 | 0.12 | 8 | Endothelial Cells |
| <i>ITGA1</i>        | 0.74 | 0.00 | 0.00 | 0.54 | 0.25 | 8 | Endothelial Cells |
| <i>ARHGAP18</i>     | 0.73 | 0.00 | 0.00 | 0.42 | 0.11 | 8 | Endothelial Cells |
| <i>FSCN1</i>        | 0.73 | 0.00 | 0.00 | 0.48 | 0.21 | 8 | Endothelial Cells |
| <i>GATA2</i>        | 0.73 | 0.00 | 0.00 | 0.30 | 0.06 | 8 | Endothelial Cells |
| <i>RTN4</i>         | 0.73 | 0.00 | 0.00 | 0.76 | 0.63 | 8 | Endothelial Cells |
| <i>JUP</i>          | 0.72 | 0.00 | 0.00 | 0.38 | 0.16 | 8 | Endothelial Cells |
| <i>SOCS3</i>        | 0.72 | 0.00 | 0.00 | 0.33 | 0.18 | 8 | Endothelial Cells |
| <i>CLEC14A</i>      | 0.72 | 0.00 | 0.00 | 0.60 | 0.18 | 8 | Endothelial Cells |
| <i>PPA1</i>         | 0.72 | 0.00 | 0.00 | 0.56 | 0.36 | 8 | Endothelial Cells |
| <i>DHRS3</i>        | 0.71 | 0.00 | 0.00 | 0.32 | 0.10 | 8 | Endothelial Cells |
| <i>PROCR</i>        | 0.71 | 0.00 | 0.00 | 0.37 | 0.13 | 8 | Endothelial Cells |
| <i>IFNGR1</i>       | 0.71 | 0.00 | 0.00 | 0.48 | 0.26 | 8 | Endothelial Cells |
| <i>DLL4</i>         | 0.71 | 0.00 | 0.00 | 0.27 | 0.05 | 8 | Endothelial Cells |
| <i>ANXA1</i>        | 0.7  | 0.00 | 0.00 | 0.70 | 0.39 | 8 | Endothelial Cells |
| <i>CTNND1</i>       | 0.7  | 0.00 | 0.00 | 0.50 | 0.24 | 8 | Endothelial Cells |
| <i>ZNF331</i>       | 0.7  | 0.00 | 0.00 | 0.29 | 0.10 | 8 | Endothelial Cells |
| <i>QKI</i>          | 0.7  | 0.00 | 0.00 | 0.43 | 0.19 | 8 | Endothelial Cells |
| <i>EFNA1</i>        | 0.69 | 0.00 | 0.00 | 0.41 | 0.13 | 8 | Endothelial Cells |
| <i>FLT1</i>         | 0.69 | 0.00 | 0.00 | 0.30 | 0.07 | 8 | Endothelial Cells |
| <i>MAPKAPK5-AS1</i> | 0.69 | 0.00 | 0.00 | 0.33 | 0.11 | 8 | Endothelial Cells |
| <i>PREX1</i>        | 0.69 | 0.00 | 0.00 | 0.27 | 0.07 | 8 | Endothelial Cells |
| <i>SH2D3C</i>       | 0.69 | 0.00 | 0.00 | 0.33 | 0.11 | 8 | Endothelial Cells |
| <i>OCLN</i>         | 0.69 | 0.00 | 0.00 | 0.26 | 0.06 | 8 | Endothelial Cells |
| <i>TMSB10</i>       | 0.69 | 0.00 | 0.00 | 1.00 | 0.99 | 8 | Endothelial Cells |
| <i>KITLG</i>        | 0.69 | 0.00 | 0.00 | 0.27 | 0.07 | 8 | Endothelial Cells |
| <i>PLA2G4C</i>      | 0.69 | 0.00 | 0.00 | 0.28 | 0.03 | 8 | Endothelial Cells |
| <i>AFMID</i>        | 0.68 | 0.00 | 0.00 | 0.26 | 0.07 | 8 | Endothelial Cells |
| <i>THSD1</i>        | 0.68 | 0.00 | 0.00 | 0.34 | 0.08 | 8 | Endothelial Cells |
| <i>WARS</i>         | 0.68 | 0.00 | 0.00 | 0.39 | 0.19 | 8 | Endothelial Cells |
| <i>PTPRN2</i>       | 0.68 | 0.00 | 0.00 | 0.30 | 0.06 | 8 | Endothelial Cells |
| <i>LAP3</i>         | 0.68 | 0.00 | 0.00 | 0.41 | 0.21 | 8 | Endothelial Cells |
| <i>TFPI</i>         | 0.67 | 0.00 | 0.00 | 0.64 | 0.42 | 8 | Endothelial Cells |
| <i>SLC12A2</i>      | 0.67 | 0.00 | 0.00 | 0.30 | 0.11 | 8 | Endothelial Cells |

|                 |      |      |      |      |      |   |                   |
|-----------------|------|------|------|------|------|---|-------------------|
| <i>PIK3IP1</i>  | 0.67 | 0.00 | 0.00 | 0.28 | 0.08 | 8 | Endothelial Cells |
| <i>PEA15</i>    | 0.67 | 0.00 | 0.00 | 0.46 | 0.26 | 8 | Endothelial Cells |
| <i>CAPZA2</i>   | 0.66 | 0.00 | 0.00 | 0.68 | 0.51 | 8 | Endothelial Cells |
| <i>LTC4S</i>    | 0.66 | 0.00 | 0.00 | 0.27 | 0.07 | 8 | Endothelial Cells |
| <i>TMEM179B</i> | 0.66 | 0.00 | 0.00 | 0.43 | 0.27 | 8 | Endothelial Cells |
| <i>PTTG1IP</i>  | 0.66 | 0.00 | 0.00 | 0.53 | 0.32 | 8 | Endothelial Cells |
| <i>HLX</i>      | 0.65 | 0.00 | 0.00 | 0.30 | 0.12 | 8 | Endothelial Cells |
| <i>PHLDA1</i>   | 0.65 | 0.00 | 0.00 | 0.41 | 0.23 | 8 | Endothelial Cells |
| <i>TAPBP</i>    | 0.65 | 0.00 | 0.00 | 0.46 | 0.24 | 8 | Endothelial Cells |
| <i>ID1</i>      | 0.64 | 0.00 | 0.00 | 0.59 | 0.34 | 8 | Endothelial Cells |
| <i>SEC14L1</i>  | 0.63 | 0.00 | 0.00 | 0.33 | 0.13 | 8 | Endothelial Cells |
| <i>ARL2</i>     | 0.63 | 0.00 | 0.00 | 0.52 | 0.34 | 8 | Endothelial Cells |
| <i>RASIP1</i>   | 0.63 | 0.00 | 0.00 | 0.30 | 0.09 | 8 | Endothelial Cells |
| <i>LMO2</i>     | 0.63 | 0.00 | 0.00 | 0.30 | 0.09 | 8 | Endothelial Cells |
| <i>MAP3K11</i>  | 0.63 | 0.00 | 0.00 | 0.36 | 0.14 | 8 | Endothelial Cells |
| <i>CXorf36</i>  | 0.62 | 0.00 | 0.00 | 0.29 | 0.07 | 8 | Endothelial Cells |
| <i>SOX18</i>    | 0.62 | 0.00 | 0.00 | 0.31 | 0.10 | 8 | Endothelial Cells |
| <i>LSR</i>      | 0.62 | 0.00 | 0.00 | 0.27 | 0.09 | 8 | Endothelial Cells |
| <i>JAM2</i>     | 0.62 | 0.00 | 0.00 | 0.35 | 0.11 | 8 | Endothelial Cells |
| <i>CASP1</i>    | 0.61 | 0.00 | 0.00 | 0.31 | 0.12 | 8 | Endothelial Cells |
| <i>MESDC1</i>   | 0.61 | 0.00 | 0.00 | 0.35 | 0.15 | 8 | Endothelial Cells |
| <i>CAPN2</i>    | 0.61 | 0.00 | 0.00 | 0.46 | 0.31 | 8 | Endothelial Cells |
| <i>NECAP2</i>   | 0.61 | 0.00 | 0.00 | 0.40 | 0.22 | 8 | Endothelial Cells |
| <i>SLC3A2</i>   | 0.61 | 0.00 | 0.00 | 0.38 | 0.23 | 8 | Endothelial Cells |
| <i>CASP4</i>    | 0.61 | 0.00 | 0.00 | 0.33 | 0.15 | 8 | Endothelial Cells |
| <i>MYLIP</i>    | 0.61 | 0.00 | 0.00 | 0.46 | 0.29 | 8 | Endothelial Cells |
| <i>ARHGEF15</i> | 0.61 | 0.00 | 0.00 | 0.26 | 0.06 | 8 | Endothelial Cells |
| <i>MFNG</i>     | 0.61 | 0.00 | 0.00 | 0.27 | 0.06 | 8 | Endothelial Cells |
| <i>PRPSAP1</i>  | 0.61 | 0.00 | 0.00 | 0.36 | 0.18 | 8 | Endothelial Cells |
| <i>MLLT4</i>    | 0.6  | 0.00 | 0.00 | 0.36 | 0.16 | 8 | Endothelial Cells |
| <i>RPN1</i>     | 0.6  | 0.00 | 0.00 | 0.45 | 0.25 | 8 | Endothelial Cells |
| <i>LAPTM4A</i>  | 0.6  | 0.00 | 0.00 | 0.93 | 0.84 | 8 | Endothelial Cells |
| <i>HHEX</i>     | 0.59 | 0.00 | 0.00 | 0.27 | 0.09 | 8 | Endothelial Cells |
| <i>VAMP3</i>    | 0.59 | 0.00 | 0.00 | 0.43 | 0.26 | 8 | Endothelial Cells |
| <i>MTIF3</i>    | 0.59 | 0.00 | 0.00 | 0.37 | 0.22 | 8 | Endothelial Cells |
| <i>SIRT2</i>    | 0.59 | 0.00 | 0.00 | 0.36 | 0.19 | 8 | Endothelial Cells |
| <i>SP100</i>    | 0.59 | 0.00 | 0.00 | 0.35 | 0.19 | 8 | Endothelial Cells |
| <i>APPL1</i>    | 0.59 | 0.00 | 0.00 | 0.34 | 0.17 | 8 | Endothelial Cells |
| <i>NFKBIA</i>   | 0.58 | 0.00 | 0.00 | 0.54 | 0.39 | 8 | Endothelial Cells |
| <i>JUN</i>      | 0.58 | 0.00 | 0.00 | 0.86 | 0.67 | 8 | Endothelial Cells |
| <i>GIMAP6</i>   | 0.58 | 0.00 | 0.00 | 0.27 | 0.07 | 8 | Endothelial Cells |
| <i>RAC1</i>     | 0.58 | 0.00 | 0.00 | 0.90 | 0.80 | 8 | Endothelial Cells |
| <i>RPS6KA2</i>  | 0.58 | 0.00 | 0.00 | 0.27 | 0.10 | 8 | Endothelial Cells |

|                     |      |      |      |      |      |   |                   |
|---------------------|------|------|------|------|------|---|-------------------|
| <i>MGST2</i>        | 0.58 | 0.00 | 0.00 | 0.43 | 0.25 | 8 | Endothelial Cells |
| <i>SPARC</i>        | 0.57 | 0.00 | 0.00 | 0.98 | 0.84 | 8 | Endothelial Cells |
| <i>HOPX</i>         | 0.57 | 0.00 | 0.00 | 0.32 | 0.11 | 8 | Endothelial Cells |
| <i>TMBIM1</i>       | 0.57 | 0.00 | 0.00 | 0.38 | 0.24 | 8 | Endothelial Cells |
| <i>ZEB1</i>         | 0.57 | 0.00 | 0.00 | 0.31 | 0.14 | 8 | Endothelial Cells |
| <i>CD46</i>         | 0.57 | 0.00 | 0.00 | 0.42 | 0.27 | 8 | Endothelial Cells |
| <i>REEP3</i>        | 0.56 | 0.00 | 0.00 | 0.32 | 0.15 | 8 | Endothelial Cells |
| <i>NUMB</i>         | 0.56 | 0.00 | 0.00 | 0.35 | 0.19 | 8 | Endothelial Cells |
| <i>DAAM1</i>        | 0.56 | 0.00 | 0.00 | 0.36 | 0.23 | 8 | Endothelial Cells |
| <i>LMO7</i>         | 0.56 | 0.00 | 0.00 | 0.27 | 0.07 | 8 | Endothelial Cells |
| <i>LUZP1</i>        | 0.56 | 0.00 | 0.00 | 0.33 | 0.17 | 8 | Endothelial Cells |
| <i>SCARF1</i>       | 0.55 | 0.00 | 0.00 | 0.26 | 0.07 | 8 | Endothelial Cells |
| <i>RAC1P2</i>       | 0.55 | 0.00 | 0.00 | 0.58 | 0.43 | 8 | Endothelial Cells |
| <i>GRN</i>          | 0.55 | 0.00 | 0.00 | 0.58 | 0.40 | 8 | Endothelial Cells |
| <i>CA4</i>          | 0.55 | 0.00 | 0.00 | 0.32 | 0.11 | 8 | Endothelial Cells |
| <i>CD200</i>        | 0.55 | 0.00 | 0.00 | 0.28 | 0.11 | 8 | Endothelial Cells |
| <i>PODXL</i>        | 0.55 | 0.00 | 0.00 | 0.29 | 0.08 | 8 | Endothelial Cells |
| <i>TMEM50A</i>      | 0.55 | 0.00 | 0.00 | 0.55 | 0.42 | 8 | Endothelial Cells |
| <i>GBP1</i>         | 0.54 | 0.00 | 0.00 | 0.25 | 0.12 | 8 | Endothelial Cells |
| <i>TCF4</i>         | 0.54 | 0.00 | 0.00 | 0.62 | 0.47 | 8 | Endothelial Cells |
| <i>GPX1</i>         | 0.54 | 0.00 | 0.00 | 0.69 | 0.52 | 8 | Endothelial Cells |
| <i>ETS1</i>         | 0.54 | 0.00 | 0.00 | 0.31 | 0.14 | 8 | Endothelial Cells |
| <i>TMEM100</i>      | 0.54 | 0.00 | 0.00 | 0.32 | 0.15 | 8 | Endothelial Cells |
| <i>CLIC1</i>        | 0.54 | 0.00 | 0.00 | 0.82 | 0.63 | 8 | Endothelial Cells |
| <i>AES</i>          | 0.53 | 0.00 | 0.00 | 0.57 | 0.43 | 8 | Endothelial Cells |
| <i>CTC-479C5.12</i> | 0.53 | 0.00 | 0.00 | 0.26 | 0.10 | 8 | Endothelial Cells |
| <i>MYL12A</i>       | 0.53 | 0.00 | 0.00 | 0.85 | 0.74 | 8 | Endothelial Cells |
| <i>SERPINB1</i>     | 0.53 | 0.00 | 0.00 | 0.34 | 0.19 | 8 | Endothelial Cells |
| <i>TGFBR2</i>       | 0.53 | 0.00 | 0.00 | 0.38 | 0.19 | 8 | Endothelial Cells |
| <i>GUSBP3</i>       | 0.53 | 0.00 | 0.00 | 0.29 | 0.15 | 8 | Endothelial Cells |
| <i>RGL2</i>         | 0.53 | 0.00 | 0.00 | 0.33 | 0.18 | 8 | Endothelial Cells |
| <i>TLE4</i>         | 0.53 | 0.00 | 0.00 | 0.32 | 0.20 | 8 | Endothelial Cells |
| <i>CLEC2B</i>       | 0.53 | 0.00 | 0.00 | 0.34 | 0.16 | 8 | Endothelial Cells |
| <i>RRAS</i>         | 0.53 | 0.00 | 0.00 | 0.32 | 0.15 | 8 | Endothelial Cells |
| <i>POLR2F</i>       | 0.52 | 0.00 | 0.00 | 0.46 | 0.36 | 8 | Endothelial Cells |
| <i>SNRK</i>         | 0.52 | 0.00 | 0.00 | 0.26 | 0.12 | 8 | Endothelial Cells |
| <i>TSPO</i>         | 0.52 | 0.00 | 0.00 | 0.61 | 0.43 | 8 | Endothelial Cells |
| <i>TJP1</i>         | 0.52 | 0.00 | 0.00 | 0.44 | 0.28 | 8 | Endothelial Cells |
| <i>TMEM219</i>      | 0.52 | 0.00 | 0.00 | 0.44 | 0.31 | 8 | Endothelial Cells |
| <i>SYNE2</i>        | 0.52 | 0.00 | 0.00 | 0.32 | 0.18 | 8 | Endothelial Cells |
| <i>DYNLL1</i>       | 0.52 | 0.00 | 0.00 | 0.86 | 0.78 | 8 | Endothelial Cells |
| <i>PRKCH</i>        | 0.52 | 0.00 | 0.00 | 0.25 | 0.09 | 8 | Endothelial Cells |

|                  |      |      |      |      |      |   |                   |
|------------------|------|------|------|------|------|---|-------------------|
| <i>KIAA0355</i>  | 0.52 | 0.00 | 0.00 | 0.34 | 0.17 | 8 | Endothelial Cells |
| <i>C5orf56</i>   | 0.52 | 0.00 | 0.00 | 0.26 | 0.10 | 8 | Endothelial Cells |
| <i>MID1IP1</i>   | 0.51 | 0.00 | 0.00 | 0.27 | 0.15 | 8 | Endothelial Cells |
| <i>S1PR1</i>     | 0.51 | 0.00 | 0.00 | 0.31 | 0.13 | 8 | Endothelial Cells |
| <i>DNAJA1</i>    | 0.51 | 0.00 | 0.00 | 0.57 | 0.48 | 8 | Endothelial Cells |
| <i>NEAT1</i>     | 0.51 | 0.00 | 0.00 | 0.83 | 0.62 | 8 | Endothelial Cells |
| <i>RNF13</i>     | 0.51 | 0.00 | 0.00 | 0.35 | 0.21 | 8 | Endothelial Cells |
| <i>FLI1</i>      | 0.5  | 0.00 | 0.00 | 0.27 | 0.11 | 8 | Endothelial Cells |
| <i>TRIOBP</i>    | 0.5  | 0.00 | 0.00 | 0.34 | 0.19 | 8 | Endothelial Cells |
| <i>MYL12B</i>    | 0.5  | 0.00 | 0.00 | 0.85 | 0.77 | 8 | Endothelial Cells |
| <i>ETS2</i>      | 0.49 | 0.00 | 0.00 | 0.44 | 0.27 | 8 | Endothelial Cells |
| <i>HDAC7</i>     | 0.49 | 0.00 | 0.00 | 0.30 | 0.16 | 8 | Endothelial Cells |
| <i>UACA</i>      | 0.49 | 0.00 | 0.00 | 0.40 | 0.24 | 8 | Endothelial Cells |
| <i>MARCKS</i>    | 0.49 | 0.00 | 0.00 | 0.65 | 0.52 | 8 | Endothelial Cells |
| <i>NES</i>       | 0.49 | 0.00 | 0.00 | 0.26 | 0.12 | 8 | Endothelial Cells |
| <i>NOTCH4</i>    | 0.49 | 0.00 | 0.00 | 0.28 | 0.12 | 8 | Endothelial Cells |
| <i>PDCL</i>      | 0.49 | 0.00 | 0.00 | 0.26 | 0.14 | 8 | Endothelial Cells |
| <i>PSMA3</i>     | 0.49 | 0.00 | 0.00 | 0.42 | 0.33 | 8 | Endothelial Cells |
| <i>CSTB</i>      | 0.48 | 0.00 | 0.00 | 0.64 | 0.49 | 8 | Endothelial Cells |
| <i>CRBN</i>      | 0.48 | 0.00 | 0.00 | 0.32 | 0.20 | 8 | Endothelial Cells |
| <i>FXVD6</i>     | 0.48 | 0.00 | 0.00 | 0.53 | 0.41 | 8 | Endothelial Cells |
| <i>BMPR2</i>     | 0.48 | 0.00 | 0.00 | 0.36 | 0.21 | 8 | Endothelial Cells |
| <i>TBX2</i>      | 0.47 | 0.00 | 0.00 | 0.48 | 0.35 | 8 | Endothelial Cells |
| <i>RAB5A</i>     | 0.47 | 0.00 | 0.00 | 0.33 | 0.20 | 8 | Endothelial Cells |
| <i>MEF2A</i>     | 0.47 | 0.00 | 0.00 | 0.30 | 0.16 | 8 | Endothelial Cells |
| <i>EVA1B</i>     | 0.47 | 0.00 | 0.00 | 0.29 | 0.15 | 8 | Endothelial Cells |
| <i>GABARAPL1</i> | 0.47 | 0.00 | 0.00 | 0.27 | 0.15 | 8 | Endothelial Cells |
| <i>SIGIRR</i>    | 0.46 | 0.00 | 0.00 | 0.28 | 0.16 | 8 | Endothelial Cells |
| <i>TPM3</i>      | 0.46 | 0.00 | 0.00 | 0.46 | 0.30 | 8 | Endothelial Cells |
| <i>SPPL2A</i>    | 0.46 | 0.00 | 0.00 | 0.26 | 0.18 | 8 | Endothelial Cells |
| <i>CKLF</i>      | 0.46 | 0.00 | 0.00 | 0.31 | 0.18 | 8 | Endothelial Cells |
| <i>EPB41L2</i>   | 0.46 | 0.00 | 0.00 | 0.37 | 0.26 | 8 | Endothelial Cells |
| <i>YWHAE</i>     | 0.46 | 0.00 | 0.00 | 0.74 | 0.63 | 8 | Endothelial Cells |
| <i>SERTAD1</i>   | 0.45 | 0.00 | 0.00 | 0.29 | 0.18 | 8 | Endothelial Cells |
| <i>TMEM173</i>   | 0.45 | 0.00 | 0.00 | 0.36 | 0.22 | 8 | Endothelial Cells |
| <i>TNFRSF1A</i>  | 0.45 | 0.00 | 0.00 | 0.46 | 0.38 | 8 | Endothelial Cells |
| <i>TMEM9B</i>    | 0.45 | 0.00 | 0.00 | 0.30 | 0.17 | 8 | Endothelial Cells |
| <i>MAPK3</i>     | 0.45 | 0.00 | 0.00 | 0.29 | 0.16 | 8 | Endothelial Cells |
| <i>MOB2</i>      | 0.45 | 0.00 | 0.00 | 0.33 | 0.21 | 8 | Endothelial Cells |
| <i>AAMDC</i>     | 0.45 | 0.00 | 0.00 | 0.37 | 0.26 | 8 | Endothelial Cells |
| <i>GIMAP1</i>    | 0.45 | 0.00 | 0.00 | 0.25 | 0.10 | 8 | Endothelial Cells |
| <i>GNL1</i>      | 0.45 | 0.00 | 0.00 | 0.27 | 0.19 | 8 | Endothelial Cells |
| <i>SOX4</i>      | 0.44 | 0.00 | 0.00 | 0.78 | 0.76 | 8 | Endothelial Cells |

|                      |      |      |      |      |      |   |                   |
|----------------------|------|------|------|------|------|---|-------------------|
| <i>IFI27L2</i>       | 0.44 | 0.00 | 0.00 | 0.44 | 0.34 | 8 | Endothelial Cells |
| <i>NDFIP1</i>        | 0.44 | 0.00 | 0.00 | 0.57 | 0.50 | 8 | Endothelial Cells |
| <i>ARHGEF12</i>      | 0.44 | 0.00 | 0.00 | 0.35 | 0.25 | 8 | Endothelial Cells |
| <i>TUSC3</i>         | 0.44 | 0.00 | 0.01 | 0.29 | 0.21 | 8 | Endothelial Cells |
| <i>CD320</i>         | 0.44 | 0.00 | 0.00 | 0.28 | 0.15 | 8 | Endothelial Cells |
| <i>PHACTR4</i>       | 0.43 | 0.00 | 0.00 | 0.26 | 0.14 | 8 | Endothelial Cells |
| <i>TXNIP</i>         | 0.43 | 0.00 | 0.00 | 0.84 | 0.67 | 8 | Endothelial Cells |
| <i>HSPA1A</i>        | 0.43 | 0.00 | 0.00 | 0.73 | 0.64 | 8 | Endothelial Cells |
| <i>PLEC</i>          | 0.43 | 0.00 | 0.00 | 0.25 | 0.16 | 8 | Endothelial Cells |
| <i>NINJ1</i>         | 0.43 | 0.00 | 0.00 | 0.28 | 0.17 | 8 | Endothelial Cells |
| <i>TAGLN2</i>        | 0.43 | 0.00 | 0.00 | 0.81 | 0.75 | 8 | Endothelial Cells |
| <i>UBC</i>           | 0.43 | 0.00 | 0.00 | 0.85 | 0.84 | 8 | Endothelial Cells |
| <i>CHMP5</i>         | 0.43 | 0.00 | 0.00 | 0.49 | 0.42 | 8 | Endothelial Cells |
| <i>MT-ND2</i>        | 0.43 | 0.00 | 0.00 | 0.99 | 0.99 | 8 | Endothelial Cells |
| <i>ACTN4</i>         | 0.43 | 0.00 | 0.00 | 0.49 | 0.40 | 8 | Endothelial Cells |
| <i>SHISA5</i>        | 0.43 | 0.00 | 0.00 | 0.36 | 0.26 | 8 | Endothelial Cells |
| <i>ITGA5</i>         | 0.43 | 0.00 | 0.00 | 0.26 | 0.12 | 8 | Endothelial Cells |
| <i>MAGED2</i>        | 0.43 | 0.00 | 0.00 | 0.73 | 0.62 | 8 | Endothelial Cells |
| <i>VIMP</i>          | 0.43 | 0.00 | 0.00 | 0.47 | 0.38 | 8 | Endothelial Cells |
| <i>TMEM50B</i>       | 0.42 | 0.00 | 0.00 | 0.33 | 0.23 | 8 | Endothelial Cells |
| <i>RHOA</i>          | 0.42 | 0.00 | 0.00 | 0.81 | 0.69 | 8 | Endothelial Cells |
| <i>CDC37</i>         | 0.42 | 0.00 | 0.00 | 0.54 | 0.49 | 8 | Endothelial Cells |
| <i>BRI3</i>          | 0.42 | 0.00 | 0.00 | 0.40 | 0.29 | 8 | Endothelial Cells |
| <i>CFLAR</i>         | 0.42 | 0.00 | 0.00 | 0.39 | 0.26 | 8 | Endothelial Cells |
| <i>FIS1</i>          | 0.42 | 0.00 | 0.00 | 0.56 | 0.51 | 8 | Endothelial Cells |
| <i>RAB1A</i>         | 0.41 | 0.00 | 0.00 | 0.54 | 0.48 | 8 | Endothelial Cells |
| <i>YIPF3</i>         | 0.41 | 0.00 | 0.00 | 0.43 | 0.33 | 8 | Endothelial Cells |
| <i>ADGRF5</i>        | 0.41 | 0.00 | 0.00 | 0.30 | 0.17 | 8 | Endothelial Cells |
| <i>NECTIN2</i>       | 0.4  | 0.00 | 0.01 | 0.33 | 0.24 | 8 | Endothelial Cells |
| <i>DYNC1LI2</i>      | 0.4  | 0.00 | 0.00 | 0.38 | 0.27 | 8 | Endothelial Cells |
| <i>RP11-467L13.5</i> | 0.4  | 0.00 | 0.00 | 0.28 | 0.19 | 8 | Endothelial Cells |
| <i>LSM2</i>          | 0.4  | 0.00 | 0.01 | 0.39 | 0.32 | 8 | Endothelial Cells |
| <i>PLEKHA1</i>       | 0.4  | 0.00 | 0.01 | 0.26 | 0.17 | 8 | Endothelial Cells |
| <i>IER2</i>          | 0.4  | 0.00 | 0.00 | 0.56 | 0.46 | 8 | Endothelial Cells |
| <i>CHMP1B</i>        | 0.4  | 0.00 | 0.00 | 0.31 | 0.22 | 8 | Endothelial Cells |
| <i>SULT1A1</i>       | 0.4  | 0.00 | 0.00 | 0.27 | 0.15 | 8 | Endothelial Cells |
| <i>SLC44A2</i>       | 0.4  | 0.00 | 0.00 | 0.28 | 0.17 | 8 | Endothelial Cells |
| <i>CDKN1C</i>        | 0.39 | 0.00 | 0.01 | 0.30 | 0.20 | 8 | Endothelial Cells |
| <i>POLR2L</i>        | 0.39 | 0.00 | 0.00 | 0.75 | 0.67 | 8 | Endothelial Cells |
| <i>PXDN</i>          | 0.39 | 0.00 | 0.00 | 0.30 | 0.20 | 8 | Endothelial Cells |
| <i>JUNB</i>          | 0.39 | 0.00 | 0.00 | 0.60 | 0.51 | 8 | Endothelial Cells |
| <i>NAA38</i>         | 0.39 | 0.00 | 0.00 | 0.49 | 0.38 | 8 | Endothelial Cells |

|                 |      |      |      |      |      |   |                   |
|-----------------|------|------|------|------|------|---|-------------------|
| <i>SPTAN1</i>   | 0.39 | 0.00 | 0.00 | 0.33 | 0.22 | 8 | Endothelial Cells |
| <i>YWHAB</i>    | 0.39 | 0.00 | 0.00 | 0.61 | 0.59 | 8 | Endothelial Cells |
| <i>CALM1</i>    | 0.38 | 0.00 | 0.00 | 0.79 | 0.74 | 8 | Endothelial Cells |
| <i>HPCAL1</i>   | 0.38 | 0.00 | 0.00 | 0.28 | 0.15 | 8 | Endothelial Cells |
| <i>DCAF7</i>    | 0.38 | 0.00 | 0.01 | 0.31 | 0.22 | 8 | Endothelial Cells |
| <i>VIM</i>      | 0.38 | 0.00 | 0.00 | 0.98 | 0.94 | 8 | Endothelial Cells |
| <i>AK1</i>      | 0.38 | 0.00 | 0.00 | 0.27 | 0.17 | 8 | Endothelial Cells |
| <i>MARCKSL1</i> | 0.38 | 0.00 | 0.00 | 0.74 | 0.60 | 8 | Endothelial Cells |
| <i>ERICH1</i>   | 0.38 | 0.00 | 0.03 | 0.27 | 0.18 | 8 | Endothelial Cells |
| <i>RHOC</i>     | 0.38 | 0.00 | 0.00 | 0.69 | 0.60 | 8 | Endothelial Cells |
| <i>STK4</i>     | 0.38 | 0.00 | 0.00 | 0.28 | 0.16 | 8 | Endothelial Cells |
| <i>DYNLRB1</i>  | 0.38 | 0.00 | 0.00 | 0.54 | 0.50 | 8 | Endothelial Cells |
| <i>GLUD1</i>    | 0.38 | 0.00 | 0.00 | 0.35 | 0.26 | 8 | Endothelial Cells |
| <i>KLC1</i>     | 0.37 | 0.00 | 0.00 | 0.31 | 0.20 | 8 | Endothelial Cells |
| <i>STOM</i>     | 0.37 | 0.00 | 0.00 | 0.60 | 0.43 | 8 | Endothelial Cells |
| <i>TMEM109</i>  | 0.37 | 0.00 | 0.01 | 0.40 | 0.32 | 8 | Endothelial Cells |
| <i>KRTCAP2</i>  | 0.37 | 0.00 | 0.00 | 0.59 | 0.54 | 8 | Endothelial Cells |
| <i>GPSM3</i>    | 0.37 | 0.00 | 0.00 | 0.27 | 0.14 | 8 | Endothelial Cells |
| <i>TSC22D1</i>  | 0.37 | 0.00 | 0.00 | 0.66 | 0.61 | 8 | Endothelial Cells |
| <i>HNRNPF</i>   | 0.36 | 0.00 | 0.01 | 0.51 | 0.47 | 8 | Endothelial Cells |
| <i>POMP</i>     | 0.36 | 0.00 | 0.00 | 0.64 | 0.62 | 8 | Endothelial Cells |
| <i>TMBIM6</i>   | 0.36 | 0.00 | 0.00 | 0.73 | 0.67 | 8 | Endothelial Cells |
| <i>SERINC3</i>  | 0.36 | 0.00 | 0.00 | 0.36 | 0.24 | 8 | Endothelial Cells |
| <i>KLF2</i>     | 0.36 | 0.00 | 0.00 | 0.28 | 0.17 | 8 | Endothelial Cells |
| <i>C11orf31</i> | 0.36 | 0.00 | 0.00 | 0.60 | 0.55 | 8 | Endothelial Cells |
| <i>CIB1</i>     | 0.35 | 0.00 | 0.01 | 0.41 | 0.33 | 8 | Endothelial Cells |
| <i>ZNHIT1</i>   | 0.35 | 0.00 | 0.03 | 0.49 | 0.45 | 8 | Endothelial Cells |
| <i>CYSTM1</i>   | 0.35 | 0.00 | 0.01 | 0.42 | 0.33 | 8 | Endothelial Cells |
| <i>NDUFB4</i>   | 0.35 | 0.00 | 0.00 | 0.64 | 0.61 | 8 | Endothelial Cells |
| <i>RABAC1</i>   | 0.35 | 0.00 | 0.00 | 0.65 | 0.59 | 8 | Endothelial Cells |
| <i>NDUFAF3</i>  | 0.35 | 0.00 | 0.00 | 0.51 | 0.45 | 8 | Endothelial Cells |
| <i>TPST2</i>    | 0.35 | 0.00 | 0.00 | 0.26 | 0.14 | 8 | Endothelial Cells |
| <i>PSMB1</i>    | 0.35 | 0.00 | 0.00 | 0.68 | 0.65 | 8 | Endothelial Cells |
| <i>DDAH2</i>    | 0.34 | 0.00 | 0.00 | 0.59 | 0.54 | 8 | Endothelial Cells |
| <i>NTPCR</i>    | 0.34 | 0.00 | 0.01 | 0.26 | 0.17 | 8 | Endothelial Cells |
| <i>ANXA7</i>    | 0.34 | 0.00 | 0.05 | 0.38 | 0.31 | 8 | Endothelial Cells |
| <i>KTN1</i>     | 0.34 | 0.00 | 0.00 | 0.62 | 0.56 | 8 | Endothelial Cells |
| <i>DAD1</i>     | 0.33 | 0.00 | 0.00 | 0.68 | 0.64 | 8 | Endothelial Cells |
| <i>HYAL2</i>    | 0.33 | 0.00 | 0.00 | 0.40 | 0.22 | 8 | Endothelial Cells |
| <i>ATXN3</i>    | 0.33 | 0.00 | 0.04 | 0.27 | 0.18 | 8 | Endothelial Cells |
| <i>CCND1</i>    | 0.33 | 0.00 | 0.00 | 0.40 | 0.22 | 8 | Endothelial Cells |
| <i>RPS27L</i>   | 0.33 | 0.00 | 0.00 | 0.61 | 0.58 | 8 | Endothelial Cells |
| <i>RGCC</i>     | 0.33 | 0.00 | 0.00 | 0.60 | 0.33 | 8 | Endothelial Cells |

|                 |      |      |      |      |      |   |                   |
|-----------------|------|------|------|------|------|---|-------------------|
| <i>S100A10</i>  | 0.32 | 0.00 | 0.00 | 0.90 | 0.64 | 8 | Endothelial Cells |
| <i>PSMA7</i>    | 0.32 | 0.00 | 0.00 | 0.75 | 0.72 | 8 | Endothelial Cells |
| <i>ENG</i>      | 0.31 | 0.00 | 0.00 | 0.43 | 0.30 | 8 | Endothelial Cells |
| <i>ARPC3</i>    | 0.31 | 0.00 | 0.00 | 0.70 | 0.61 | 8 | Endothelial Cells |
| <i>S100A11</i>  | 0.31 | 0.00 | 0.00 | 0.73 | 0.60 | 8 | Endothelial Cells |
| <i>ATP6V0E1</i> | 0.31 | 0.00 | 0.00 | 0.65 | 0.60 | 8 | Endothelial Cells |
| <i>ADIRF</i>    | 0.3  | 0.00 | 0.00 | 0.87 | 0.48 | 8 | Endothelial Cells |
| <i>TIMP3</i>    | 0.29 | 0.00 | 0.00 | 0.65 | 0.55 | 8 | Endothelial Cells |
| <i>RNASE1</i>   | 0.28 | 0.00 | 0.00 | 0.63 | 0.26 | 8 | Endothelial Cells |
| <i>PDIA3</i>    | 0.28 | 0.00 | 0.04 | 0.61 | 0.58 | 8 | Endothelial Cells |
| <i>GNLY</i>     | 3.41 | 0.00 | 0.00 | 0.47 | 0.02 | 9 | T Cells           |
| <i>NKG7</i>     | 3.36 | 0.00 | 0.00 | 0.69 | 0.05 | 9 | T Cells           |
| <i>KLRB1</i>    | 2.93 | 0.00 | 0.00 | 0.69 | 0.01 | 9 | T Cells           |
| <i>GZMB</i>     | 2.76 | 0.00 | 0.00 | 0.53 | 0.01 | 9 | T Cells           |
| <i>CCL4</i>     | 2.74 | 0.00 | 0.00 | 0.39 | 0.02 | 9 | T Cells           |
| <i>PRF1</i>     | 2.61 | 0.00 | 0.00 | 0.57 | 0.01 | 9 | T Cells           |
| <i>CCL5</i>     | 2.42 | 0.00 | 0.00 | 0.42 | 0.02 | 9 | T Cells           |
| <i>CCL3</i>     | 2.42 | 0.00 | 0.00 | 0.26 | 0.03 | 9 | T Cells           |
| <i>CTSW</i>     | 2.39 | 0.00 | 0.00 | 0.71 | 0.01 | 9 | T Cells           |
| <i>CD7</i>      | 2.35 | 0.00 | 0.00 | 0.82 | 0.01 | 9 | T Cells           |
| <i>GZMA</i>     | 2.33 | 0.00 | 0.00 | 0.62 | 0.01 | 9 | T Cells           |
| <i>CST7</i>     | 2.3  | 0.00 | 0.00 | 0.58 | 0.02 | 9 | T Cells           |
| <i>XCL2</i>     | 2.3  | 0.00 | 0.00 | 0.40 | 0.00 | 9 | T Cells           |
| <i>IFITM1</i>   | 2.18 | 0.00 | 0.00 | 0.87 | 0.15 | 9 | T Cells           |
| <i>TRBC1</i>    | 2.13 | 0.00 | 0.00 | 0.65 | 0.01 | 9 | T Cells           |
| <i>CORO1A</i>   | 1.96 | 0.00 | 0.00 | 0.83 | 0.10 | 9 | T Cells           |
| <i>CD247</i>    | 1.95 | 0.00 | 0.00 | 0.66 | 0.00 | 9 | T Cells           |
| <i>KLRD1</i>    | 1.9  | 0.00 | 0.00 | 0.48 | 0.01 | 9 | T Cells           |
| <i>TRDC</i>     | 1.88 | 0.00 | 0.00 | 0.46 | 0.00 | 9 | T Cells           |
| <i>PLAC8</i>    | 1.87 | 0.00 | 0.00 | 0.70 | 0.06 | 9 | T Cells           |
| <i>HCST</i>     | 1.83 | 0.00 | 0.00 | 0.71 | 0.07 | 9 | T Cells           |
| <i>CD3D</i>     | 1.81 | 0.00 | 0.00 | 0.47 | 0.00 | 9 | T Cells           |
| <i>RAC2</i>     | 1.74 | 0.00 | 0.00 | 0.73 | 0.07 | 9 | T Cells           |
| <i>LTB</i>      | 1.69 | 0.00 | 0.00 | 0.45 | 0.04 | 9 | T Cells           |
| <i>GZMM</i>     | 1.68 | 0.00 | 0.00 | 0.57 | 0.01 | 9 | T Cells           |
| <i>ITGB2</i>    | 1.62 | 0.00 | 0.00 | 0.64 | 0.07 | 9 | T Cells           |
| <i>TRAC</i>     | 1.6  | 0.00 | 0.00 | 0.35 | 0.01 | 9 | T Cells           |
| <i>LCK</i>      | 1.6  | 0.00 | 0.00 | 0.59 | 0.01 | 9 | T Cells           |
| <i>XCL1</i>     | 1.58 | 0.00 | 0.00 | 0.25 | 0.00 | 9 | T Cells           |
| <i>LIMD2</i>    | 1.58 | 0.00 | 0.00 | 0.72 | 0.13 | 9 | T Cells           |
| <i>CMC1</i>     | 1.57 | 0.00 | 0.00 | 0.43 | 0.13 | 9 | T Cells           |
| <i>PTPRC</i>    | 1.56 | 0.00 | 0.00 | 0.70 | 0.07 | 9 | T Cells           |
| <i>FCGR3A</i>   | 1.55 | 0.00 | 0.00 | 0.42 | 0.04 | 9 | T Cells           |

|                   |      |      |      |      |      |   |         |
|-------------------|------|------|------|------|------|---|---------|
| <i>IL2RG</i>      | 1.54 | 0.00 | 0.00 | 0.62 | 0.03 | 9 | T Cells |
| <i>TRBC2</i>      | 1.53 | 0.00 | 0.00 | 0.50 | 0.01 | 9 | T Cells |
| <i>PCED1B-AS1</i> | 1.46 | 0.00 | 0.00 | 0.57 | 0.02 | 9 | T Cells |
| <i>EVL</i>        | 1.45 | 0.00 | 0.00 | 0.72 | 0.18 | 9 | T Cells |
| <i>FGFBP2</i>     | 1.44 | 0.00 | 0.00 | 0.30 | 0.01 | 9 | T Cells |
| <i>SPON2</i>      | 1.41 | 0.00 | 0.00 | 0.40 | 0.11 | 9 | T Cells |
| <i>LSP1</i>       | 1.39 | 0.00 | 0.00 | 0.66 | 0.09 | 9 | T Cells |
| <i>ARHGDIB</i>    | 1.36 | 0.00 | 0.00 | 0.82 | 0.29 | 9 | T Cells |
| <i>KLRF1</i>      | 1.35 | 0.00 | 0.00 | 0.35 | 0.00 | 9 | T Cells |
| <i>BIN2</i>       | 1.31 | 0.00 | 0.00 | 0.45 | 0.03 | 9 | T Cells |
| <i>IER2</i>       | 1.29 | 0.00 | 0.00 | 0.77 | 0.45 | 9 | T Cells |
| <i>RARRES3</i>    | 1.29 | 0.00 | 0.00 | 0.52 | 0.11 | 9 | T Cells |
| <i>CD160</i>      | 1.28 | 0.00 | 0.00 | 0.32 | 0.00 | 9 | T Cells |
| <i>KLRC1</i>      | 1.28 | 0.00 | 0.00 | 0.27 | 0.00 | 9 | T Cells |
| <i>CD53</i>       | 1.28 | 0.00 | 0.00 | 0.54 | 0.08 | 9 | T Cells |
| <i>GZMH</i>       | 1.27 | 0.00 | 0.00 | 0.28 | 0.00 | 9 | T Cells |
| <i>MATK</i>       | 1.25 | 0.00 | 0.00 | 0.42 | 0.01 | 9 | T Cells |
| <i>CD3E</i>       | 1.22 | 0.00 | 0.00 | 0.38 | 0.00 | 9 | T Cells |
| <i>FYB</i>        | 1.22 | 0.00 | 0.00 | 0.45 | 0.04 | 9 | T Cells |
| <i>ACAP1</i>      | 1.21 | 0.00 | 0.00 | 0.46 | 0.04 | 9 | T Cells |
| <i>MYO1F</i>      | 1.21 | 0.00 | 0.00 | 0.40 | 0.05 | 9 | T Cells |
| <i>HOPX</i>       | 1.19 | 0.00 | 0.00 | 0.44 | 0.11 | 9 | T Cells |
| <i>CD48</i>       | 1.18 | 0.00 | 0.00 | 0.51 | 0.05 | 9 | T Cells |
| <i>CD52</i>       | 1.17 | 0.00 | 0.00 | 0.48 | 0.09 | 9 | T Cells |
| <i>IL2RB</i>      | 1.17 | 0.00 | 0.00 | 0.35 | 0.00 | 9 | T Cells |
| <i>HLA-B</i>      | 1.17 | 0.00 | 0.00 | 0.99 | 0.53 | 9 | T Cells |
| <i>GIMAP7</i>     | 1.16 | 0.00 | 0.00 | 0.67 | 0.16 | 9 | T Cells |
| <i>LCP1</i>       | 1.16 | 0.00 | 0.00 | 0.52 | 0.07 | 9 | T Cells |
| <i>S1PR5</i>      | 1.16 | 0.00 | 0.00 | 0.28 | 0.00 | 9 | T Cells |
| <i>TRAF3IP3</i>   | 1.15 | 0.00 | 0.00 | 0.42 | 0.02 | 9 | T Cells |
| <i>PYHIN1</i>     | 1.14 | 0.00 | 0.00 | 0.36 | 0.00 | 9 | T Cells |
| <i>TBC1D10C</i>   | 1.14 | 0.00 | 0.00 | 0.45 | 0.02 | 9 | T Cells |
| <i>DUSP2</i>      | 1.13 | 0.00 | 0.00 | 0.31 | 0.01 | 9 | T Cells |
| <i>CLIC3</i>      | 1.11 | 0.00 | 0.00 | 0.32 | 0.05 | 9 | T Cells |
| <i>DENND2D</i>    | 1.11 | 0.00 | 0.00 | 0.35 | 0.01 | 9 | T Cells |
| <i>ARL4C</i>      | 1.11 | 0.00 | 0.00 | 0.36 | 0.06 | 9 | T Cells |
| <i>CD37</i>       | 1.09 | 0.00 | 0.00 | 0.53 | 0.07 | 9 | T Cells |
| <i>UCP2</i>       | 1.08 | 0.00 | 0.00 | 0.53 | 0.11 | 9 | T Cells |
| <i>STK17A</i>     | 1.06 | 0.00 | 0.00 | 0.39 | 0.06 | 9 | T Cells |
| <i>ZAP70</i>      | 1.06 | 0.00 | 0.00 | 0.38 | 0.00 | 9 | T Cells |
| <i>HLA-A</i>      | 1.06 | 0.00 | 0.00 | 1.00 | 0.69 | 9 | T Cells |
| <i>CYBA</i>       | 1.05 | 0.00 | 0.00 | 0.86 | 0.51 | 9 | T Cells |
| <i>B2M</i>        | 1.04 | 0.00 | 0.00 | 1.00 | 0.99 | 9 | T Cells |

|                     |      |      |      |      |      |   |         |
|---------------------|------|------|------|------|------|---|---------|
| <i>SELL</i>         | 1.04 | 0.00 | 0.00 | 0.27 | 0.03 | 9 | T Cells |
| <i>DNAJB1</i>       | 1.04 | 0.00 | 0.00 | 0.51 | 0.21 | 9 | T Cells |
| <i>TXK</i>          | 1.03 | 0.00 | 0.00 | 0.33 | 0.00 | 9 | T Cells |
| <i>ID2</i>          | 1.03 | 0.00 | 0.00 | 0.83 | 0.61 | 9 | T Cells |
| <i>RP11-347P5.1</i> | 1.02 | 0.00 | 0.00 | 0.32 | 0.03 | 9 | T Cells |
| <i>BTG1</i>         | 1.02 | 0.00 | 0.00 | 0.86 | 0.68 | 9 | T Cells |
| <i>CD3G</i>         | 1.02 | 0.00 | 0.00 | 0.31 | 0.00 | 9 | T Cells |
| <i>PLEK</i>         | 1    | 0.00 | 0.00 | 0.29 | 0.04 | 9 | T Cells |
| <i>FCER1G</i>       | 1    | 0.00 | 0.00 | 0.58 | 0.13 | 9 | T Cells |
| <i>JUN</i>          | 1    | 0.00 | 0.00 | 0.85 | 0.68 | 9 | T Cells |
| <i>IL16</i>         | 0.99 | 0.00 | 0.00 | 0.36 | 0.03 | 9 | T Cells |
| <i>STK4</i>         | 0.99 | 0.00 | 0.00 | 0.51 | 0.15 | 9 | T Cells |
| <i>IRF1</i>         | 0.98 | 0.00 | 0.00 | 0.54 | 0.19 | 9 | T Cells |
| <i>HAVCR2</i>       | 0.98 | 0.00 | 0.00 | 0.28 | 0.02 | 9 | T Cells |
| <i>AC092580.4</i>   | 0.98 | 0.00 | 0.00 | 0.26 | 0.00 | 9 | T Cells |
| <i>LAPTM5</i>       | 0.97 | 0.00 | 0.00 | 0.58 | 0.14 | 9 | T Cells |
| <i>JUNB</i>         | 0.97 | 0.00 | 0.00 | 0.73 | 0.51 | 9 | T Cells |
| <i>DOK2</i>         | 0.97 | 0.00 | 0.00 | 0.35 | 0.05 | 9 | T Cells |
| <i>HSPA1B</i>       | 0.96 | 0.00 | 0.00 | 0.64 | 0.37 | 9 | T Cells |
| <i>CD69</i>         | 0.94 | 0.00 | 0.00 | 0.26 | 0.01 | 9 | T Cells |
| <i>GPSM3</i>        | 0.94 | 0.00 | 0.00 | 0.47 | 0.13 | 9 | T Cells |
| <i>PSMB9</i>        | 0.94 | 0.00 | 0.00 | 0.56 | 0.21 | 9 | T Cells |
| <i>RHOH</i>         | 0.93 | 0.00 | 0.00 | 0.32 | 0.01 | 9 | T Cells |
| <i>TBX21</i>        | 0.93 | 0.00 | 0.00 | 0.26 | 0.00 | 9 | T Cells |
| <i>PFN1</i>         | 0.93 | 0.00 | 0.00 | 0.95 | 0.85 | 9 | T Cells |
| <i>LINC00861</i>    | 0.93 | 0.00 | 0.00 | 0.28 | 0.00 | 9 | T Cells |
| <i>ALOX5AP</i>      | 0.92 | 0.00 | 0.00 | 0.27 | 0.02 | 9 | T Cells |
| <i>CLEC2D</i>       | 0.92 | 0.00 | 0.00 | 0.41 | 0.08 | 9 | T Cells |
| <i>SAMD3</i>        | 0.92 | 0.00 | 0.00 | 0.32 | 0.00 | 9 | T Cells |
| <i>CD27</i>         | 0.92 | 0.00 | 0.00 | 0.25 | 0.00 | 9 | T Cells |
| <i>CYTIP</i>        | 0.92 | 0.00 | 0.00 | 0.34 | 0.04 | 9 | T Cells |
| <i>APOBEC3G</i>     | 0.92 | 0.00 | 0.00 | 0.28 | 0.05 | 9 | T Cells |
| <i>TYROBP</i>       | 0.91 | 0.00 | 0.00 | 0.55 | 0.12 | 9 | T Cells |
| <i>ICAM3</i>        | 0.91 | 0.00 | 0.00 | 0.42 | 0.08 | 9 | T Cells |
| <i>FAM49B</i>       | 0.91 | 0.00 | 0.00 | 0.41 | 0.13 | 9 | T Cells |
| <i>1-Sep</i>        | 0.91 | 0.00 | 0.00 | 0.34 | 0.04 | 9 | T Cells |
| <i>HLA-C</i>        | 0.91 | 0.00 | 0.00 | 0.92 | 0.54 | 9 | T Cells |
| <i>SYTL1</i>        | 0.91 | 0.00 | 0.00 | 0.28 | 0.01 | 9 | T Cells |
| <i>RHOF</i>         | 0.91 | 0.00 | 0.00 | 0.31 | 0.05 | 9 | T Cells |
| <i>SKAP1</i>        | 0.9  | 0.00 | 0.00 | 0.29 | 0.01 | 9 | T Cells |
| <i>CD300A</i>       | 0.9  | 0.00 | 0.00 | 0.27 | 0.05 | 9 | T Cells |
| <i>CD2</i>          | 0.9  | 0.00 | 0.00 | 0.28 | 0.00 | 9 | T Cells |

|                      |      |      |      |      |      |   |         |
|----------------------|------|------|------|------|------|---|---------|
| <i>RNF213</i>        | 0.9  | 0.00 | 0.00 | 0.44 | 0.19 | 9 | T Cells |
| <i>ARHGAP45</i>      | 0.89 | 0.00 | 0.00 | 0.33 | 0.03 | 9 | T Cells |
| <i>FYN</i>           | 0.88 | 0.00 | 0.00 | 0.40 | 0.12 | 9 | T Cells |
| <i>ARHGEF1</i>       | 0.88 | 0.00 | 0.00 | 0.44 | 0.13 | 9 | T Cells |
| <i>FMNL1</i>         | 0.88 | 0.00 | 0.00 | 0.31 | 0.03 | 9 | T Cells |
| <i>ARPC1B</i>        | 0.87 | 0.00 | 0.00 | 0.59 | 0.30 | 9 | T Cells |
| <i>IL7R</i>          | 0.86 | 0.00 | 0.00 | 0.32 | 0.09 | 9 | T Cells |
| <i>FGR</i>           | 0.86 | 0.00 | 0.00 | 0.26 | 0.06 | 9 | T Cells |
| <i>ARHGAP30</i>      | 0.86 | 0.00 | 0.00 | 0.32 | 0.04 | 9 | T Cells |
| <i>FAM65B</i>        | 0.86 | 0.00 | 0.00 | 0.30 | 0.04 | 9 | T Cells |
| <i>RUNX3</i>         | 0.85 | 0.00 | 0.00 | 0.30 | 0.03 | 9 | T Cells |
| <i>SRGN</i>          | 0.85 | 0.00 | 0.00 | 0.72 | 0.21 | 9 | T Cells |
| <i>TCF7</i>          | 0.85 | 0.00 | 0.00 | 0.29 | 0.06 | 9 | T Cells |
| <i>NCR3</i>          | 0.84 | 0.00 | 0.00 | 0.27 | 0.00 | 9 | T Cells |
| <i>RP11-796E2.4</i>  | 0.84 | 0.00 | 0.00 | 0.30 | 0.09 | 9 | T Cells |
| <i>HCLS1</i>         | 0.84 | 0.00 | 0.00 | 0.37 | 0.06 | 9 | T Cells |
| <i>GIMAP4</i>        | 0.84 | 0.00 | 0.00 | 0.51 | 0.18 | 9 | T Cells |
| <i>ATM</i>           | 0.83 | 0.00 | 0.00 | 0.35 | 0.09 | 9 | T Cells |
| <i>DEF6</i>          | 0.82 | 0.00 | 0.00 | 0.30 | 0.02 | 9 | T Cells |
| <i>PTPN7</i>         | 0.81 | 0.00 | 0.00 | 0.28 | 0.02 | 9 | T Cells |
| <i>PRKCH</i>         | 0.8  | 0.00 | 0.00 | 0.36 | 0.09 | 9 | T Cells |
| <i>WIPF1</i>         | 0.8  | 0.00 | 0.00 | 0.36 | 0.12 | 9 | T Cells |
| <i>CCND3</i>         | 0.8  | 0.00 | 0.00 | 0.39 | 0.15 | 9 | T Cells |
| <i>AKNA</i>          | 0.79 | 0.00 | 0.00 | 0.28 | 0.06 | 9 | T Cells |
| <i>RASSF5</i>        | 0.78 | 0.00 | 0.00 | 0.29 | 0.03 | 9 | T Cells |
| <i>GADD45B</i>       | 0.78 | 0.00 | 0.00 | 0.63 | 0.42 | 9 | T Cells |
| <i>STK17B</i>        | 0.78 | 0.00 | 0.00 | 0.28 | 0.05 | 9 | T Cells |
| <i>SLC2A3</i>        | 0.78 | 0.00 | 0.00 | 0.42 | 0.17 | 9 | T Cells |
| <i>PIM1</i>          | 0.77 | 0.00 | 0.00 | 0.34 | 0.08 | 9 | T Cells |
| <i>EFHD2</i>         | 0.77 | 0.00 | 0.00 | 0.32 | 0.11 | 9 | T Cells |
| <i>CDKN2D</i>        | 0.74 | 0.00 | 0.00 | 0.26 | 0.05 | 9 | T Cells |
| <i>AAK1</i>          | 0.74 | 0.00 | 0.00 | 0.44 | 0.23 | 9 | T Cells |
| <i>ADGRE5</i>        | 0.73 | 0.00 | 0.00 | 0.34 | 0.13 | 9 | T Cells |
| <i>PTPN4</i>         | 0.73 | 0.00 | 0.00 | 0.29 | 0.07 | 9 | T Cells |
| <i>PPP2R5C</i>       | 0.73 | 0.00 | 0.00 | 0.34 | 0.13 | 9 | T Cells |
| <i>CH17-189H20.1</i> | 0.72 | 0.00 | 0.00 | 0.28 | 0.07 | 9 | T Cells |
| <i>CDC42SE1</i>      | 0.72 | 0.00 | 0.00 | 0.31 | 0.14 | 9 | T Cells |
| <i>ARPC2</i>         | 0.72 | 0.00 | 0.00 | 0.82 | 0.63 | 9 | T Cells |
| <i>HEXIM1</i>        | 0.71 | 0.00 | 0.00 | 0.42 | 0.26 | 9 | T Cells |
| <i>MBP</i>           | 0.71 | 0.00 | 0.00 | 0.27 | 0.04 | 9 | T Cells |
| <i>PSMB8</i>         | 0.71 | 0.00 | 0.00 | 0.50 | 0.26 | 9 | T Cells |
| <i>PPP1R18</i>       | 0.71 | 0.00 | 0.00 | 0.36 | 0.15 | 9 | T Cells |

|                    |      |      |      |      |      |   |         |
|--------------------|------|------|------|------|------|---|---------|
| <i>APMAP</i>       | 0.71 | 0.00 | 0.00 | 0.37 | 0.23 | 9 | T Cells |
| <i>SUN2</i>        | 0.71 | 0.00 | 0.00 | 0.35 | 0.16 | 9 | T Cells |
| <i>FCMR</i>        | 0.7  | 0.00 | 0.00 | 0.26 | 0.03 | 9 | T Cells |
| <i>SLC38A2</i>     | 0.7  | 0.00 | 0.00 | 0.42 | 0.25 | 9 | T Cells |
| <i>TSTD1</i>       | 0.7  | 0.00 | 0.00 | 0.31 | 0.07 | 9 | T Cells |
| <i>JAK1</i>        | 0.69 | 0.00 | 0.00 | 0.44 | 0.31 | 9 | T Cells |
| <i>GBP2</i>        | 0.69 | 0.00 | 0.00 | 0.32 | 0.11 | 9 | T Cells |
| <i>MYL12A</i>      | 0.69 | 0.00 | 0.00 | 0.86 | 0.75 | 9 | T Cells |
| <i>IL27RA</i>      | 0.68 | 0.00 | 0.00 | 0.26 | 0.05 | 9 | T Cells |
| <i>GMFG</i>        | 0.68 | 0.00 | 0.00 | 0.58 | 0.27 | 9 | T Cells |
| <i>SNHG9</i>       | 0.68 | 0.00 | 0.00 | 0.36 | 0.16 | 9 | T Cells |
| <i>ISG20</i>       | 0.67 | 0.00 | 0.00 | 0.27 | 0.05 | 9 | T Cells |
| <i>FOSB</i>        | 0.67 | 0.00 | 0.00 | 0.32 | 0.14 | 9 | T Cells |
| <i>ZFP36L2</i>     | 0.66 | 0.00 | 0.00 | 0.65 | 0.49 | 9 | T Cells |
| <i>SLC9A3R1</i>    | 0.65 | 0.00 | 0.00 | 0.27 | 0.06 | 9 | T Cells |
| <i>RPS29</i>       | 0.65 | 0.00 | 0.00 | 1.00 | 0.99 | 9 | T Cells |
| <i>CDC42SE2</i>    | 0.65 | 0.00 | 0.00 | 0.26 | 0.09 | 9 | T Cells |
| <i>PTPN6</i>       | 0.65 | 0.00 | 0.00 | 0.30 | 0.07 | 9 | T Cells |
| <i>REL</i>         | 0.65 | 0.00 | 0.00 | 0.26 | 0.08 | 9 | T Cells |
| 9-Sep              | 0.65 | 0.00 | 0.00 | 0.43 | 0.24 | 9 | T Cells |
| <i>PRPF38B</i>     | 0.65 | 0.00 | 0.00 | 0.53 | 0.35 | 9 | T Cells |
| <i>HLA-F</i>       | 0.64 | 0.00 | 0.00 | 0.36 | 0.12 | 9 | T Cells |
| <i>CHST12</i>      | 0.64 | 0.00 | 0.00 | 0.37 | 0.24 | 9 | T Cells |
| <i>PSMB10</i>      | 0.64 | 0.00 | 0.00 | 0.47 | 0.25 | 9 | T Cells |
| <i>BTN3A2</i>      | 0.64 | 0.00 | 0.00 | 0.31 | 0.11 | 9 | T Cells |
| <i>GNG2</i>        | 0.63 | 0.00 | 0.00 | 0.31 | 0.15 | 9 | T Cells |
| <i>TGFB1</i>       | 0.63 | 0.00 | 0.00 | 0.36 | 0.15 | 9 | T Cells |
| <i>LEF1</i>        | 0.63 | 0.00 | 0.00 | 0.25 | 0.07 | 9 | T Cells |
| <i>GIMAP1</i>      | 0.62 | 0.00 | 0.00 | 0.30 | 0.10 | 9 | T Cells |
| <i>RP4-765C7.2</i> | 0.62 | 0.00 | 0.00 | 0.66 | 0.51 | 9 | T Cells |
| <i>FXYS5</i>       | 0.62 | 0.00 | 0.00 | 0.51 | 0.26 | 9 | T Cells |
| <i>OSTF1</i>       | 0.61 | 0.00 | 0.00 | 0.40 | 0.23 | 9 | T Cells |
| <i>ABRACL</i>      | 0.6  | 0.00 | 0.00 | 0.35 | 0.13 | 9 | T Cells |
| <i>C1orf56</i>     | 0.59 | 0.00 | 0.01 | 0.30 | 0.18 | 9 | T Cells |
| <i>FOS</i>         | 0.59 | 0.00 | 0.00 | 0.48 | 0.35 | 9 | T Cells |
| <i>C9orf142</i>    | 0.59 | 0.00 | 0.00 | 0.36 | 0.22 | 9 | T Cells |
| <i>RCSD1</i>       | 0.59 | 0.00 | 0.00 | 0.39 | 0.18 | 9 | T Cells |
| <i>SRSF7</i>       | 0.59 | 0.00 | 0.00 | 0.57 | 0.50 | 9 | T Cells |
| <i>RPL28</i>       | 0.58 | 0.00 | 0.00 | 0.98 | 0.98 | 9 | T Cells |
| <i>RPS27</i>       | 0.58 | 0.00 | 0.00 | 1.00 | 1.00 | 9 | T Cells |
| <i>FKBP11</i>      | 0.58 | 0.00 | 0.00 | 0.25 | 0.09 | 9 | T Cells |
| <i>ARPC5L</i>      | 0.58 | 0.00 | 0.00 | 0.32 | 0.19 | 9 | T Cells |
| <i>RAP1B</i>       | 0.58 | 0.00 | 0.00 | 0.45 | 0.33 | 9 | T Cells |

|                      |      |      |      |      |      |   |         |
|----------------------|------|------|------|------|------|---|---------|
| <i>FERMT3</i>        | 0.58 | 0.00 | 0.00 | 0.26 | 0.06 | 9 | T Cells |
| <i>ELF1</i>          | 0.57 | 0.00 | 0.00 | 0.33 | 0.16 | 9 | T Cells |
| <i>CLEC2B</i>        | 0.56 | 0.00 | 0.00 | 0.34 | 0.17 | 9 | T Cells |
| <i>SIGIRR</i>        | 0.56 | 0.00 | 0.00 | 0.28 | 0.17 | 9 | T Cells |
| <i>ABI3</i>          | 0.56 | 0.00 | 0.00 | 0.26 | 0.09 | 9 | T Cells |
| <i>UBE2F</i>         | 0.56 | 0.00 | 0.00 | 0.27 | 0.13 | 9 | T Cells |
| <i>ABHD17A</i>       | 0.56 | 0.00 | 0.00 | 0.31 | 0.16 | 9 | T Cells |
| <i>PPP1CA</i>        | 0.55 | 0.00 | 0.00 | 0.50 | 0.37 | 9 | T Cells |
| <i>ETS1</i>          | 0.55 | 0.00 | 0.00 | 0.32 | 0.14 | 9 | T Cells |
| <i>C5orf56</i>       | 0.55 | 0.00 | 0.00 | 0.25 | 0.10 | 9 | T Cells |
| <i>PABPC1</i>        | 0.54 | 0.00 | 0.00 | 0.80 | 0.74 | 9 | T Cells |
| <i>TAP1</i>          | 0.54 | 0.00 | 0.00 | 0.30 | 0.12 | 9 | T Cells |
| <i>GTF3A</i>         | 0.54 | 0.00 | 0.00 | 0.42 | 0.25 | 9 | T Cells |
| <i>DGKZ</i>          | 0.53 | 0.00 | 0.00 | 0.30 | 0.13 | 9 | T Cells |
| <i>PCSK7</i>         | 0.53 | 0.00 | 0.00 | 0.41 | 0.28 | 9 | T Cells |
| <i>ARPC3</i>         | 0.53 | 0.00 | 0.00 | 0.74 | 0.61 | 9 | T Cells |
| <i>SEPT6</i>         | 0.53 | 0.00 | 0.00 | 0.38 | 0.21 | 9 | T Cells |
| <i>TLE4</i>          | 0.52 | 0.00 | 0.00 | 0.37 | 0.21 | 9 | T Cells |
| <i>VAMP8</i>         | 0.52 | 0.00 | 0.00 | 0.43 | 0.18 | 9 | T Cells |
| <i>HMOX2</i>         | 0.52 | 0.00 | 0.00 | 0.32 | 0.18 | 9 | T Cells |
| <i>HSP90AA1</i>      | 0.52 | 0.00 | 0.00 | 0.91 | 0.86 | 9 | T Cells |
| <i>RP11-761N21.2</i> | 0.51 | 0.00 | 0.00 | 0.71 | 0.62 | 9 | T Cells |
| <i>PRMT2</i>         | 0.51 | 0.00 | 0.02 | 0.43 | 0.32 | 9 | T Cells |
| <i>EIF4A1</i>        | 0.51 | 0.00 | 0.03 | 0.41 | 0.29 | 9 | T Cells |
| <i>KLF2</i>          | 0.5  | 0.00 | 0.00 | 0.34 | 0.18 | 9 | T Cells |
| <i>TPST2</i>         | 0.5  | 0.00 | 0.00 | 0.28 | 0.14 | 9 | T Cells |
| <i>CAP1</i>          | 0.5  | 0.00 | 0.00 | 0.60 | 0.46 | 9 | T Cells |
| <i>IL32</i>          | 0.49 | 0.00 | 0.00 | 0.48 | 0.28 | 9 | T Cells |
| <i>XBP1</i>          | 0.49 | 0.00 | 0.03 | 0.42 | 0.30 | 9 | T Cells |
| <i>RHOG</i>          | 0.49 | 0.00 | 0.00 | 0.38 | 0.21 | 9 | T Cells |
| <i>BRD2</i>          | 0.48 | 0.00 | 0.05 | 0.41 | 0.31 | 9 | T Cells |
| <i>DDX39A</i>        | 0.48 | 0.00 | 0.04 | 0.27 | 0.16 | 9 | T Cells |
| <i>INTS6</i>         | 0.47 | 0.00 | 0.01 | 0.32 | 0.19 | 9 | T Cells |
| <i>HSPA8</i>         | 0.47 | 0.00 | 0.00 | 0.70 | 0.60 | 9 | T Cells |
| <i>RPSA</i>          | 0.46 | 0.00 | 0.00 | 0.86 | 0.90 | 9 | T Cells |
| <i>AES</i>           | 0.46 | 0.00 | 0.00 | 0.56 | 0.43 | 9 | T Cells |
| <i>RPL13P12</i>      | 0.46 | 0.00 | 0.00 | 0.95 | 0.96 | 9 | T Cells |
| <i>C9orf16</i>       | 0.46 | 0.00 | 0.01 | 0.42 | 0.30 | 9 | T Cells |
| <i>SNHG5</i>         | 0.46 | 0.00 | 0.00 | 0.66 | 0.57 | 9 | T Cells |
| <i>CD44</i>          | 0.46 | 0.00 | 0.00 | 0.43 | 0.26 | 9 | T Cells |
| <i>APRT</i>          | 0.45 | 0.00 | 0.00 | 0.54 | 0.42 | 9 | T Cells |
| <i>TPM3</i>          | 0.45 | 0.00 | 0.00 | 0.48 | 0.30 | 9 | T Cells |

|                       |      |      |      |      |      |    |                   |
|-----------------------|------|------|------|------|------|----|-------------------|
| <i>CLIC1</i>          | 0.45 | 0.00 | 0.00 | 0.68 | 0.64 | 9  | T Cells           |
| <i>PSME1</i>          | 0.44 | 0.00 | 0.01 | 0.65 | 0.60 | 9  | T Cells           |
| <i>RPS21</i>          | 0.44 | 0.00 | 0.00 | 0.92 | 0.93 | 9  | T Cells           |
| <i>DDX5</i>           | 0.43 | 0.00 | 0.00 | 0.90 | 0.79 | 9  | T Cells           |
| <i>HLA-E</i>          | 0.43 | 0.00 | 0.00 | 0.90 | 0.59 | 9  | T Cells           |
| <i>GYPC</i>           | 0.42 | 0.00 | 0.03 | 0.44 | 0.33 | 9  | T Cells           |
| <i>EEF1B2</i>         | 0.42 | 0.00 | 0.00 | 0.73 | 0.74 | 9  | T Cells           |
| <i>RPLP2</i>          | 0.42 | 0.00 | 0.00 | 1.00 | 0.99 | 9  | T Cells           |
| <i>PSME2</i>          | 0.41 | 0.00 | 0.00 | 0.56 | 0.45 | 9  | T Cells           |
| <i>OCIAD2</i>         | 0.41 | 0.00 | 0.00 | 0.29 | 0.14 | 9  | T Cells           |
| <i>DDIT4</i>          | 0.4  | 0.00 | 0.03 | 0.28 | 0.16 | 9  | T Cells           |
| <i>TWF2</i>           | 0.4  | 0.00 | 0.01 | 0.28 | 0.16 | 9  | T Cells           |
| <i>SH3BGRL3</i>       | 0.39 | 0.00 | 0.00 | 0.73 | 0.58 | 9  | T Cells           |
| <i>TMSB4X</i>         | 0.38 | 0.00 | 0.00 | 1.00 | 1.00 | 9  | T Cells           |
| <i>RPS19</i>          | 0.38 | 0.00 | 0.00 | 1.00 | 0.99 | 9  | T Cells           |
| <i>RPS15A</i>         | 0.37 | 0.00 | 0.00 | 0.99 | 0.99 | 9  | T Cells           |
| <i>RP11-889L3.1</i>   | 0.37 | 0.00 | 0.00 | 0.92 | 0.86 | 9  | T Cells           |
| <i>PYCARD</i>         | 0.37 | 0.00 | 0.02 | 0.26 | 0.14 | 9  | T Cells           |
| <i>EMP3</i>           | 0.36 | 0.00 | 0.00 | 0.70 | 0.59 | 9  | T Cells           |
| <i>RBM39</i>          | 0.35 | 0.00 | 0.04 | 0.67 | 0.64 | 9  | T Cells           |
| <i>RPL37</i>          | 0.34 | 0.00 | 0.00 | 0.95 | 0.98 | 9  | T Cells           |
| <i>RPL19</i>          | 0.33 | 0.00 | 0.00 | 1.00 | 0.99 | 9  | T Cells           |
| <i>RPL18A</i>         | 0.33 | 0.00 | 0.00 | 0.98 | 0.99 | 9  | T Cells           |
| <i>RPL13</i>          | 0.32 | 0.00 | 0.00 | 1.00 | 1.00 | 9  | T Cells           |
| <i>RPS18</i>          | 0.32 | 0.00 | 0.03 | 1.00 | 1.00 | 9  | T Cells           |
| <i>CFL1</i>           | 0.32 | 0.00 | 0.00 | 0.90 | 0.91 | 9  | T Cells           |
| <i>RPS2</i>           | 0.31 | 0.00 | 0.00 | 1.00 | 0.99 | 9  | T Cells           |
| <i>CTD-2192J16.15</i> | 0.3  | 0.00 | 0.00 | 0.91 | 0.91 | 9  | T Cells           |
| <i>UBA52</i>          | 0.3  | 0.00 | 0.00 | 0.95 | 0.95 | 9  | T Cells           |
| <i>RPL12</i>          | 0.3  | 0.00 | 0.01 | 0.95 | 0.97 | 9  | T Cells           |
| <i>RPS10</i>          | 0.29 | 0.00 | 0.00 | 0.86 | 0.90 | 9  | T Cells           |
| <i>RPS3</i>           | 0.28 | 0.00 | 0.00 | 0.98 | 0.98 | 9  | T Cells           |
| <i>RPL23A</i>         | 0.27 | 0.00 | 0.00 | 0.98 | 0.98 | 9  | T Cells           |
| <i>EIF1</i>           | 0.27 | 0.00 | 0.01 | 0.96 | 0.96 | 9  | T Cells           |
| <i>RPL10</i>          | 0.27 | 0.00 | 0.00 | 1.00 | 1.00 | 9  | T Cells           |
| <i>RPL30</i>          | 0.26 | 0.00 | 0.00 | 0.98 | 0.98 | 9  | T Cells           |
| <i>MALAT1</i>         | 0.26 | 0.00 | 0.00 | 1.00 | 1.00 | 9  | T Cells           |
| <i>RPL27</i>          | 0.26 | 0.00 | 0.00 | 0.93 | 0.96 | 9  | T Cells           |
| <i>ACKR1</i>          | 3.96 | 0.00 | 0.00 | 0.83 | 0.08 | 10 | Endothelial Cells |
| <i>PTGDS</i>          | 2.17 | 0.00 | 0.00 | 0.83 | 0.15 | 10 | Endothelial Cells |
| <i>RNASE1</i>         | 2.08 | 0.00 | 0.00 | 0.99 | 0.26 | 10 | Endothelial Cells |
| <i>VWF</i>            | 2.08 | 0.00 | 0.00 | 0.92 | 0.11 | 10 | Endothelial Cells |

|                |      |      |      |      |      |    |                   |
|----------------|------|------|------|------|------|----|-------------------|
| <i>HYAL2</i>   | 2.04 | 0.00 | 0.00 | 0.86 | 0.22 | 10 | Endothelial Cells |
| <i>SLCO2A1</i> | 1.99 | 0.00 | 0.00 | 0.82 | 0.09 | 10 | Endothelial Cells |
| <i>APLNR</i>   | 1.94 | 0.00 | 0.00 | 0.80 | 0.11 | 10 | Endothelial Cells |
| <i>THBD</i>    | 1.91 | 0.00 | 0.00 | 0.86 | 0.13 | 10 | Endothelial Cells |
| <i>ACKR3</i>   | 1.79 | 0.00 | 0.00 | 0.73 | 0.02 | 10 | Endothelial Cells |
| <i>DUSP23</i>  | 1.75 | 0.00 | 0.00 | 0.73 | 0.11 | 10 | Endothelial Cells |
| <i>VCAM1</i>   | 1.75 | 0.00 | 0.00 | 0.58 | 0.03 | 10 | Endothelial Cells |
| <i>NNMT</i>    | 1.74 | 0.00 | 0.00 | 0.63 | 0.03 | 10 | Endothelial Cells |
| <i>CD59</i>    | 1.7  | 0.00 | 0.00 | 0.88 | 0.60 | 10 | Endothelial Cells |
| <i>RGS5</i>    | 1.63 | 0.00 | 0.00 | 0.91 | 0.23 | 10 | Endothelial Cells |
| <i>AQP1</i>    | 1.63 | 0.00 | 0.00 | 0.85 | 0.20 | 10 | Endothelial Cells |
| <i>MMRN2</i>   | 1.6  | 0.00 | 0.00 | 0.79 | 0.07 | 10 | Endothelial Cells |
| <i>CPE</i>     | 1.58 | 0.00 | 0.00 | 0.76 | 0.25 | 10 | Endothelial Cells |
| <i>PECAM1</i>  | 1.58 | 0.00 | 0.00 | 0.98 | 0.25 | 10 | Endothelial Cells |
| <i>RAMP3</i>   | 1.56 | 0.00 | 0.00 | 0.82 | 0.15 | 10 | Endothelial Cells |
| <i>IGFBP4</i>  | 1.55 | 0.00 | 0.00 | 0.99 | 0.49 | 10 | Endothelial Cells |
| <i>PCAT19</i>  | 1.55 | 0.00 | 0.00 | 0.92 | 0.17 | 10 | Endothelial Cells |
| <i>ICAM1</i>   | 1.48 | 0.00 | 0.00 | 0.60 | 0.10 | 10 | Endothelial Cells |
| <i>HSPG2</i>   | 1.48 | 0.00 | 0.00 | 0.83 | 0.18 | 10 | Endothelial Cells |
| <i>CLU</i>     | 1.47 | 0.00 | 0.00 | 0.77 | 0.31 | 10 | Endothelial Cells |
| <i>S100P</i>   | 1.42 | 0.00 | 0.00 | 0.45 | 0.01 | 10 | Endothelial Cells |
| <i>LYPD2</i>   | 1.41 | 0.00 | 0.00 | 0.47 | 0.02 | 10 | Endothelial Cells |
| <i>HEG1</i>    | 1.4  | 0.00 | 0.00 | 0.75 | 0.13 | 10 | Endothelial Cells |
| <i>SELP</i>    | 1.39 | 0.00 | 0.00 | 0.65 | 0.01 | 10 | Endothelial Cells |
| <i>CCL14</i>   | 1.38 | 0.00 | 0.00 | 0.43 | 0.03 | 10 | Endothelial Cells |
| <i>IFITM2</i>  | 1.38 | 0.00 | 0.00 | 0.96 | 0.63 | 10 | Endothelial Cells |
| <i>CALCRL</i>  | 1.36 | 0.00 | 0.00 | 0.95 | 0.18 | 10 | Endothelial Cells |
| <i>ECSCR.1</i> | 1.35 | 0.00 | 0.00 | 0.84 | 0.18 | 10 | Endothelial Cells |
| <i>MALL</i>    | 1.35 | 0.00 | 0.00 | 0.64 | 0.04 | 10 | Endothelial Cells |
| <i>IFITM3</i>  | 1.34 | 0.00 | 0.00 | 1.00 | 0.91 | 10 | Endothelial Cells |
| <i>CLEC14A</i> | 1.29 | 0.00 | 0.00 | 0.93 | 0.18 | 10 | Endothelial Cells |
| <i>FBLN2</i>   | 1.26 | 0.00 | 0.00 | 0.49 | 0.05 | 10 | Endothelial Cells |
| <i>PTPRB</i>   | 1.25 | 0.00 | 0.00 | 0.69 | 0.06 | 10 | Endothelial Cells |
| <i>ADAM15</i>  | 1.24 | 0.00 | 0.00 | 0.66 | 0.10 | 10 | Endothelial Cells |
| <i>FAM167B</i> | 1.24 | 0.00 | 0.00 | 0.66 | 0.07 | 10 | Endothelial Cells |
| <i>SRPX</i>    | 1.24 | 0.00 | 0.00 | 0.67 | 0.14 | 10 | Endothelial Cells |
| <i>PCDH17</i>  | 1.24 | 0.00 | 0.00 | 0.69 | 0.14 | 10 | Endothelial Cells |
| <i>TIMP1</i>   | 1.23 | 0.00 | 0.00 | 0.97 | 0.77 | 10 | Endothelial Cells |
| <i>IFI27</i>   | 1.2  | 0.00 | 0.00 | 1.00 | 0.35 | 10 | Endothelial Cells |
| <i>ID1</i>     | 1.2  | 0.00 | 0.00 | 0.75 | 0.34 | 10 | Endothelial Cells |
| <i>FKBP1A</i>  | 1.2  | 0.00 | 0.00 | 0.97 | 0.72 | 10 | Endothelial Cells |
| <i>IFITM1</i>  | 1.16 | 0.00 | 0.00 | 0.64 | 0.17 | 10 | Endothelial Cells |
| <i>CLDN11</i>  | 1.16 | 0.00 | 0.00 | 0.49 | 0.03 | 10 | Endothelial Cells |

|                 |      |      |      |      |      |    |                   |
|-----------------|------|------|------|------|------|----|-------------------|
| <i>CD93</i>     | 1.15 | 0.00 | 0.00 | 0.71 | 0.14 | 10 | Endothelial Cells |
| <i>PRCP</i>     | 1.15 | 0.00 | 0.00 | 0.76 | 0.23 | 10 | Endothelial Cells |
| <i>EMP3</i>     | 1.14 | 0.00 | 0.00 | 0.83 | 0.59 | 10 | Endothelial Cells |
| <i>TPST2</i>    | 1.14 | 0.00 | 0.00 | 0.65 | 0.14 | 10 | Endothelial Cells |
| <i>ENTPD1</i>   | 1.13 | 0.00 | 0.00 | 0.62 | 0.12 | 10 | Endothelial Cells |
| <i>FOXP1</i>    | 1.11 | 0.00 | 0.00 | 0.88 | 0.39 | 10 | Endothelial Cells |
| <i>LTC4S</i>    | 1.11 | 0.00 | 0.00 | 0.57 | 0.07 | 10 | Endothelial Cells |
| <i>TGM2</i>     | 1.1  | 0.00 | 0.00 | 0.87 | 0.38 | 10 | Endothelial Cells |
| <i>KLF2</i>     | 1.09 | 0.00 | 0.00 | 0.62 | 0.17 | 10 | Endothelial Cells |
| <i>RAMP2</i>    | 1.09 | 0.00 | 0.00 | 0.99 | 0.33 | 10 | Endothelial Cells |
| <i>VEGFC</i>    | 1.09 | 0.00 | 0.00 | 0.47 | 0.03 | 10 | Endothelial Cells |
| <i>CYP1B1</i>   | 1.08 | 0.00 | 0.00 | 0.33 | 0.01 | 10 | Endothelial Cells |
| <i>NPDC1</i>    | 1.07 | 0.00 | 0.00 | 0.86 | 0.29 | 10 | Endothelial Cells |
| <i>CD320</i>    | 1.04 | 0.00 | 0.00 | 0.61 | 0.14 | 10 | Endothelial Cells |
| <i>TIMP3</i>    | 1.04 | 0.00 | 0.00 | 0.75 | 0.55 | 10 | Endothelial Cells |
| <i>NRN1</i>     | 1.02 | 0.00 | 0.00 | 0.55 | 0.07 | 10 | Endothelial Cells |
| <i>TEK</i>      | 0.98 | 0.00 | 0.00 | 0.56 | 0.06 | 10 | Endothelial Cells |
| <i>ANXA2</i>    | 0.97 | 0.00 | 0.00 | 0.93 | 0.65 | 10 | Endothelial Cells |
| <i>IGF2</i>     | 0.96 | 0.00 | 0.00 | 0.55 | 0.05 | 10 | Endothelial Cells |
| <i>IL32</i>     | 0.96 | 0.00 | 0.00 | 0.86 | 0.27 | 10 | Endothelial Cells |
| <i>IL33</i>     | 0.96 | 0.00 | 0.00 | 0.68 | 0.11 | 10 | Endothelial Cells |
| <i>WARS</i>     | 0.95 | 0.00 | 0.00 | 0.62 | 0.19 | 10 | Endothelial Cells |
| <i>TMSB10</i>   | 0.94 | 0.00 | 0.00 | 1.00 | 0.99 | 10 | Endothelial Cells |
| <i>SH3BP5</i>   | 0.94 | 0.00 | 0.00 | 0.75 | 0.20 | 10 | Endothelial Cells |
| <i>EGFL7</i>    | 0.94 | 0.00 | 0.00 | 0.89 | 0.25 | 10 | Endothelial Cells |
| <i>ENG</i>      | 0.93 | 0.00 | 0.00 | 0.78 | 0.29 | 10 | Endothelial Cells |
| <i>LHX6</i>     | 0.92 | 0.00 | 0.00 | 0.46 | 0.01 | 10 | Endothelial Cells |
| <i>FXYS5</i>    | 0.91 | 0.00 | 0.00 | 0.80 | 0.25 | 10 | Endothelial Cells |
| <i>CTNNAL1</i>  | 0.91 | 0.00 | 0.00 | 0.64 | 0.19 | 10 | Endothelial Cells |
| <i>TMEM176B</i> | 0.89 | 0.00 | 0.00 | 0.60 | 0.17 | 10 | Endothelial Cells |
| <i>ADCY4</i>    | 0.89 | 0.00 | 0.00 | 0.58 | 0.09 | 10 | Endothelial Cells |
| <i>CARHSP1</i>  | 0.89 | 0.00 | 0.00 | 0.77 | 0.36 | 10 | Endothelial Cells |
| <i>PROCR</i>    | 0.88 | 0.00 | 0.00 | 0.57 | 0.13 | 10 | Endothelial Cells |
| <i>UGCG</i>     | 0.88 | 0.00 | 0.00 | 0.47 | 0.12 | 10 | Endothelial Cells |
| <i>MEIS2</i>    | 0.87 | 0.00 | 0.00 | 0.55 | 0.11 | 10 | Endothelial Cells |
| <i>ASRGL1</i>   | 0.86 | 0.00 | 0.00 | 0.45 | 0.04 | 10 | Endothelial Cells |
| <i>CRIP2</i>    | 0.86 | 0.00 | 0.00 | 0.95 | 0.65 | 10 | Endothelial Cells |
| <i>LIMS2</i>    | 0.86 | 0.00 | 0.00 | 0.53 | 0.08 | 10 | Endothelial Cells |
| <i>IL1R1</i>    | 0.86 | 0.00 | 0.00 | 0.50 | 0.11 | 10 | Endothelial Cells |
| <i>ARL4A</i>    | 0.84 | 0.00 | 0.00 | 0.47 | 0.11 | 10 | Endothelial Cells |
| <i>GUK1</i>     | 0.84 | 0.00 | 0.00 | 0.93 | 0.66 | 10 | Endothelial Cells |
| <i>PLVAP</i>    | 0.82 | 0.00 | 0.00 | 0.35 | 0.01 | 10 | Endothelial Cells |
| <i>EDN1</i>     | 0.82 | 0.00 | 0.00 | 0.38 | 0.10 | 10 | Endothelial Cells |

|                 |      |      |      |      |      |    |                   |
|-----------------|------|------|------|------|------|----|-------------------|
| <i>FLT1</i>     | 0.81 | 0.00 | 0.00 | 0.46 | 0.07 | 10 | Endothelial Cells |
| <i>ARPC1B</i>   | 0.81 | 0.00 | 0.00 | 0.73 | 0.30 | 10 | Endothelial Cells |
| <i>TSPAN7</i>   | 0.8  | 0.00 | 0.00 | 0.58 | 0.12 | 10 | Endothelial Cells |
| <i>EHD4</i>     | 0.79 | 0.00 | 0.00 | 0.46 | 0.06 | 10 | Endothelial Cells |
| <i>GIMAP7</i>   | 0.79 | 0.00 | 0.00 | 0.64 | 0.16 | 10 | Endothelial Cells |
| <i>TM4SF1</i>   | 0.79 | 0.00 | 0.00 | 0.87 | 0.39 | 10 | Endothelial Cells |
| <i>NDUFA8</i>   | 0.78 | 0.00 | 0.00 | 0.63 | 0.26 | 10 | Endothelial Cells |
| <i>HLA-B</i>    | 0.78 | 0.00 | 0.00 | 0.98 | 0.53 | 10 | Endothelial Cells |
| <i>S100A10</i>  | 0.78 | 0.00 | 0.00 | 0.99 | 0.65 | 10 | Endothelial Cells |
| <i>NUAK1</i>    | 0.78 | 0.00 | 0.00 | 0.38 | 0.04 | 10 | Endothelial Cells |
| <i>KCTD12</i>   | 0.77 | 0.00 | 0.00 | 0.71 | 0.23 | 10 | Endothelial Cells |
| <i>TPM3</i>     | 0.77 | 0.00 | 0.00 | 0.69 | 0.30 | 10 | Endothelial Cells |
| <i>IGFBP2</i>   | 0.77 | 0.00 | 0.00 | 0.64 | 0.18 | 10 | Endothelial Cells |
| <i>FAM110D</i>  | 0.77 | 0.00 | 0.00 | 0.45 | 0.04 | 10 | Endothelial Cells |
| <i>SDCBP</i>    | 0.76 | 0.00 | 0.00 | 0.84 | 0.52 | 10 | Endothelial Cells |
| <i>FLNB</i>     | 0.76 | 0.00 | 0.00 | 0.43 | 0.05 | 10 | Endothelial Cells |
| <i>NDRG1</i>    | 0.76 | 0.00 | 0.00 | 0.53 | 0.16 | 10 | Endothelial Cells |
| <i>MARCKSL1</i> | 0.76 | 0.00 | 0.00 | 0.90 | 0.60 | 10 | Endothelial Cells |
| <i>TAGLN2</i>   | 0.75 | 0.00 | 0.00 | 0.94 | 0.75 | 10 | Endothelial Cells |
| <i>ANXA3</i>    | 0.74 | 0.00 | 0.00 | 0.53 | 0.11 | 10 | Endothelial Cells |
| <i>PLAT</i>     | 0.74 | 0.00 | 0.00 | 0.49 | 0.14 | 10 | Endothelial Cells |
| <i>TRIOBP</i>   | 0.74 | 0.00 | 0.00 | 0.58 | 0.19 | 10 | Endothelial Cells |
| <i>PLXND1</i>   | 0.74 | 0.00 | 0.00 | 0.54 | 0.12 | 10 | Endothelial Cells |
| <i>SEMA3F</i>   | 0.73 | 0.00 | 0.00 | 0.33 | 0.03 | 10 | Endothelial Cells |
| <i>CDC25B</i>   | 0.73 | 0.00 | 0.00 | 0.44 | 0.11 | 10 | Endothelial Cells |
| <i>ITGA5</i>    | 0.73 | 0.00 | 0.00 | 0.49 | 0.12 | 10 | Endothelial Cells |
| <i>LEPR</i>     | 0.72 | 0.00 | 0.00 | 0.41 | 0.07 | 10 | Endothelial Cells |
| <i>CLDN5</i>    | 0.72 | 0.00 | 0.00 | 0.83 | 0.26 | 10 | Endothelial Cells |
| <i>LY6E</i>     | 0.72 | 0.00 | 0.00 | 0.82 | 0.45 | 10 | Endothelial Cells |
| <i>ARL4D</i>    | 0.72 | 0.00 | 0.00 | 0.41 | 0.10 | 10 | Endothelial Cells |
| <i>EPHB4</i>    | 0.72 | 0.00 | 0.00 | 0.43 | 0.07 | 10 | Endothelial Cells |
| <i>LYVE1</i>    | 0.72 | 0.00 | 0.00 | 0.36 | 0.06 | 10 | Endothelial Cells |
| <i>BST2</i>     | 0.72 | 0.00 | 0.00 | 0.82 | 0.29 | 10 | Endothelial Cells |
| <i>ICAM2</i>    | 0.71 | 0.00 | 0.00 | 0.71 | 0.22 | 10 | Endothelial Cells |
| <i>CD81</i>     | 0.71 | 0.00 | 0.00 | 0.73 | 0.39 | 10 | Endothelial Cells |
| <i>EVA1C</i>    | 0.71 | 0.00 | 0.00 | 0.43 | 0.02 | 10 | Endothelial Cells |
| <i>H19</i>      | 0.7  | 0.00 | 0.00 | 0.45 | 0.15 | 10 | Endothelial Cells |
| <i>NFKBIA</i>   | 0.7  | 0.00 | 0.00 | 0.62 | 0.39 | 10 | Endothelial Cells |
| <i>CDC37</i>    | 0.7  | 0.00 | 0.00 | 0.80 | 0.49 | 10 | Endothelial Cells |
| <i>NOSTRIN</i>  | 0.69 | 0.00 | 0.00 | 0.35 | 0.06 | 10 | Endothelial Cells |
| <i>SOX18</i>    | 0.69 | 0.00 | 0.00 | 0.43 | 0.10 | 10 | Endothelial Cells |
| <i>NOS3</i>     | 0.69 | 0.00 | 0.00 | 0.26 | 0.01 | 10 | Endothelial Cells |
| <i>CTSH</i>     | 0.69 | 0.00 | 0.00 | 0.54 | 0.13 | 10 | Endothelial Cells |

|                      |      |      |      |      |      |    |                   |
|----------------------|------|------|------|------|------|----|-------------------|
| <i>RAB11A</i>        | 0.68 | 0.00 | 0.00 | 0.75 | 0.44 | 10 | Endothelial Cells |
| <i>CYYR1</i>         | 0.68 | 0.00 | 0.00 | 0.52 | 0.11 | 10 | Endothelial Cells |
| <i>CHODL</i>         | 0.68 | 0.00 | 0.00 | 0.27 | 0.01 | 10 | Endothelial Cells |
| <i>SEPN1</i>         | 0.67 | 0.00 | 0.00 | 0.41 | 0.09 | 10 | Endothelial Cells |
| <i>SRGN</i>          | 0.67 | 0.00 | 0.00 | 0.82 | 0.21 | 10 | Endothelial Cells |
| <i>TLL1</i>          | 0.67 | 0.00 | 0.00 | 0.30 | 0.00 | 10 | Endothelial Cells |
| <i>ECE1</i>          | 0.66 | 0.00 | 0.00 | 0.47 | 0.15 | 10 | Endothelial Cells |
| <i>CALR</i>          | 0.66 | 0.00 | 0.00 | 0.86 | 0.58 | 10 | Endothelial Cells |
| <i>PALMD</i>         | 0.65 | 0.00 | 0.00 | 0.45 | 0.07 | 10 | Endothelial Cells |
| <i>ELK3</i>          | 0.65 | 0.00 | 0.00 | 0.51 | 0.14 | 10 | Endothelial Cells |
| <i>CD9</i>           | 0.65 | 0.00 | 0.00 | 0.71 | 0.45 | 10 | Endothelial Cells |
| <i>NPR1</i>          | 0.64 | 0.00 | 0.00 | 0.36 | 0.04 | 10 | Endothelial Cells |
| <i>JAM2</i>          | 0.64 | 0.00 | 0.00 | 0.48 | 0.12 | 10 | Endothelial Cells |
| <i>EPAS1</i>         | 0.64 | 0.00 | 0.00 | 0.82 | 0.43 | 10 | Endothelial Cells |
| <i>RHOA</i>          | 0.64 | 0.00 | 0.00 | 0.89 | 0.69 | 10 | Endothelial Cells |
| <i>TCN2</i>          | 0.64 | 0.00 | 0.00 | 0.39 | 0.06 | 10 | Endothelial Cells |
| <i>TSPO</i>          | 0.63 | 0.00 | 0.00 | 0.76 | 0.43 | 10 | Endothelial Cells |
| <i>CCDC69</i>        | 0.63 | 0.00 | 0.00 | 0.38 | 0.05 | 10 | Endothelial Cells |
| <i>SLC44A2</i>       | 0.63 | 0.00 | 0.00 | 0.52 | 0.17 | 10 | Endothelial Cells |
| <i>RP11-467L13.5</i> | 0.63 | 0.00 | 0.00 | 0.55 | 0.18 | 10 | Endothelial Cells |
| <i>S1PR1</i>         | 0.63 | 0.00 | 0.00 | 0.47 | 0.13 | 10 | Endothelial Cells |
| <i>PTTG1IP</i>       | 0.62 | 0.00 | 0.00 | 0.64 | 0.33 | 10 | Endothelial Cells |
| <i>TPM4</i>          | 0.62 | 0.00 | 0.00 | 0.82 | 0.60 | 10 | Endothelial Cells |
| <i>SYNGR2</i>        | 0.62 | 0.00 | 0.00 | 0.63 | 0.26 | 10 | Endothelial Cells |
| <i>LDB2</i>          | 0.62 | 0.00 | 0.00 | 0.59 | 0.18 | 10 | Endothelial Cells |
| <i>CMIP</i>          | 0.62 | 0.00 | 0.00 | 0.45 | 0.09 | 10 | Endothelial Cells |
| <i>TNFSF10</i>       | 0.62 | 0.00 | 0.00 | 0.69 | 0.22 | 10 | Endothelial Cells |
| <i>S100A16</i>       | 0.62 | 0.00 | 0.00 | 0.75 | 0.34 | 10 | Endothelial Cells |
| <i>RHOC</i>          | 0.62 | 0.00 | 0.00 | 0.83 | 0.60 | 10 | Endothelial Cells |
| <i>MYL12A</i>        | 0.61 | 0.00 | 0.00 | 0.93 | 0.75 | 10 | Endothelial Cells |
| <i>HDAC9</i>         | 0.61 | 0.00 | 0.00 | 0.31 | 0.02 | 10 | Endothelial Cells |
| <i>HPCAL1</i>        | 0.61 | 0.00 | 0.00 | 0.45 | 0.15 | 10 | Endothelial Cells |
| <i>EVL</i>           | 0.6  | 0.00 | 0.00 | 0.52 | 0.19 | 10 | Endothelial Cells |
| <i>HLA-A</i>         | 0.6  | 0.00 | 0.00 | 0.98 | 0.69 | 10 | Endothelial Cells |
| <i>ADGRL4</i>        | 0.6  | 0.00 | 0.00 | 0.34 | 0.03 | 10 | Endothelial Cells |
| <i>S100A11</i>       | 0.6  | 0.00 | 0.00 | 0.89 | 0.60 | 10 | Endothelial Cells |
| <i>ADAMTSL1</i>      | 0.59 | 0.00 | 0.00 | 0.27 | 0.01 | 10 | Endothelial Cells |
| <i>ESAM</i>          | 0.59 | 0.00 | 0.00 | 0.74 | 0.35 | 10 | Endothelial Cells |
| <i>BRI3</i>          | 0.59 | 0.00 | 0.00 | 0.60 | 0.29 | 10 | Endothelial Cells |
| <i>NR2F2</i>         | 0.59 | 0.00 | 0.00 | 0.63 | 0.34 | 10 | Endothelial Cells |
| <i>BCL3</i>          | 0.59 | 0.00 | 0.00 | 0.34 | 0.07 | 10 | Endothelial Cells |
| <i>HSP90B1</i>       | 0.59 | 0.00 | 0.00 | 0.84 | 0.59 | 10 | Endothelial Cells |

|                 |      |      |      |      |      |    |                   |
|-----------------|------|------|------|------|------|----|-------------------|
| <i>MRAS</i>     | 0.59 | 0.00 | 0.00 | 0.27 | 0.04 | 10 | Endothelial Cells |
| <i>LAP3</i>     | 0.59 | 0.00 | 0.00 | 0.50 | 0.22 | 10 | Endothelial Cells |
| <i>EMCN</i>     | 0.59 | 0.00 | 0.00 | 0.67 | 0.15 | 10 | Endothelial Cells |
| <i>PLPP3</i>    | 0.59 | 0.00 | 0.00 | 0.53 | 0.29 | 10 | Endothelial Cells |
| <i>CD109</i>    | 0.59 | 0.00 | 0.00 | 0.32 | 0.05 | 10 | Endothelial Cells |
| <i>TUBA1B</i>   | 0.59 | 0.00 | 0.00 | 0.93 | 0.78 | 10 | Endothelial Cells |
| <i>FKBP1C</i>   | 0.58 | 0.00 | 0.00 | 0.45 | 0.10 | 10 | Endothelial Cells |
| <i>FSCN1</i>    | 0.58 | 0.00 | 0.00 | 0.56 | 0.22 | 10 | Endothelial Cells |
| <i>TGFBR2</i>   | 0.58 | 0.00 | 0.00 | 0.49 | 0.19 | 10 | Endothelial Cells |
| <i>SAMD5</i>    | 0.58 | 0.00 | 0.00 | 0.30 | 0.04 | 10 | Endothelial Cells |
| <i>LIFR</i>     | 0.58 | 0.00 | 0.00 | 0.41 | 0.12 | 10 | Endothelial Cells |
| <i>MAML1</i>    | 0.58 | 0.00 | 0.00 | 0.40 | 0.09 | 10 | Endothelial Cells |
| <i>MESDC1</i>   | 0.58 | 0.00 | 0.00 | 0.46 | 0.15 | 10 | Endothelial Cells |
| <i>CD36</i>     | 0.58 | 0.00 | 0.00 | 0.51 | 0.15 | 10 | Endothelial Cells |
| <i>MYL12B</i>   | 0.58 | 0.00 | 0.00 | 0.91 | 0.77 | 10 | Endothelial Cells |
| <i>FLI1</i>     | 0.58 | 0.00 | 0.00 | 0.46 | 0.11 | 10 | Endothelial Cells |
| <i>PRSS23</i>   | 0.57 | 0.00 | 0.00 | 0.56 | 0.24 | 10 | Endothelial Cells |
| <i>CHSY1</i>    | 0.57 | 0.00 | 0.00 | 0.34 | 0.07 | 10 | Endothelial Cells |
| <i>PLA2G16</i>  | 0.57 | 0.00 | 0.00 | 0.40 | 0.10 | 10 | Endothelial Cells |
| <i>STOM</i>     | 0.57 | 0.00 | 0.00 | 0.76 | 0.44 | 10 | Endothelial Cells |
| <i>C1orf54</i>  | 0.57 | 0.00 | 0.00 | 0.49 | 0.18 | 10 | Endothelial Cells |
| <i>FAM129B</i>  | 0.57 | 0.00 | 0.00 | 0.37 | 0.10 | 10 | Endothelial Cells |
| <i>ADGRG6</i>   | 0.57 | 0.00 | 0.00 | 0.41 | 0.12 | 10 | Endothelial Cells |
| <i>RBP5</i>     | 0.56 | 0.00 | 0.00 | 0.28 | 0.01 | 10 | Endothelial Cells |
| <i>SORBS2</i>   | 0.56 | 0.00 | 0.00 | 0.30 | 0.07 | 10 | Endothelial Cells |
| <i>ABI3BP</i>   | 0.56 | 0.00 | 0.00 | 0.29 | 0.08 | 10 | Endothelial Cells |
| <i>HSPB1</i>    | 0.56 | 0.00 | 0.00 | 0.95 | 0.76 | 10 | Endothelial Cells |
| <i>GNAQ</i>     | 0.56 | 0.00 | 0.00 | 0.45 | 0.16 | 10 | Endothelial Cells |
| <i>BMPR2</i>    | 0.56 | 0.00 | 0.00 | 0.56 | 0.21 | 10 | Endothelial Cells |
| <i>LARP6</i>    | 0.56 | 0.00 | 0.00 | 0.36 | 0.11 | 10 | Endothelial Cells |
| <i>TUBB</i>     | 0.56 | 0.00 | 0.00 | 0.92 | 0.79 | 10 | Endothelial Cells |
| <i>FAM155A</i>  | 0.55 | 0.00 | 0.00 | 0.33 | 0.05 | 10 | Endothelial Cells |
| <i>FDPS</i>     | 0.55 | 0.00 | 0.00 | 0.69 | 0.34 | 10 | Endothelial Cells |
| <i>EHBP1L1</i>  | 0.55 | 0.00 | 0.00 | 0.33 | 0.06 | 10 | Endothelial Cells |
| <i>PTRF</i>     | 0.55 | 0.00 | 0.00 | 0.95 | 0.69 | 10 | Endothelial Cells |
| <i>SNCG</i>     | 0.55 | 0.00 | 0.00 | 0.47 | 0.11 | 10 | Endothelial Cells |
| <i>GNAI2</i>    | 0.54 | 0.00 | 0.00 | 0.65 | 0.34 | 10 | Endothelial Cells |
| <i>KLF4</i>     | 0.54 | 0.00 | 0.00 | 0.37 | 0.16 | 10 | Endothelial Cells |
| <i>TNFRSF1A</i> | 0.54 | 0.00 | 0.00 | 0.62 | 0.38 | 10 | Endothelial Cells |
| <i>APOL1</i>    | 0.54 | 0.00 | 0.00 | 0.42 | 0.08 | 10 | Endothelial Cells |
| <i>SPTAN1</i>   | 0.54 | 0.00 | 0.00 | 0.48 | 0.22 | 10 | Endothelial Cells |
| <i>C10orf11</i> | 0.54 | 0.00 | 0.00 | 0.26 | 0.07 | 10 | Endothelial Cells |
| <i>PODXL</i>    | 0.54 | 0.00 | 0.00 | 0.36 | 0.09 | 10 | Endothelial Cells |

|                 |      |      |      |      |      |    |                   |
|-----------------|------|------|------|------|------|----|-------------------|
| <i>RAI14</i>    | 0.54 | 0.00 | 0.00 | 0.36 | 0.10 | 10 | Endothelial Cells |
| <i>F2R</i>      | 0.54 | 0.00 | 0.00 | 0.34 | 0.10 | 10 | Endothelial Cells |
| <i>PEA15</i>    | 0.53 | 0.00 | 0.00 | 0.55 | 0.26 | 10 | Endothelial Cells |
| <i>CCND3</i>    | 0.53 | 0.00 | 0.00 | 0.45 | 0.15 | 10 | Endothelial Cells |
| <i>MMRN1</i>    | 0.53 | 0.00 | 0.00 | 0.27 | 0.01 | 10 | Endothelial Cells |
| <i>PPP3CA</i>   | 0.53 | 0.00 | 0.00 | 0.45 | 0.19 | 10 | Endothelial Cells |
| <i>MLLT4</i>    | 0.53 | 0.00 | 0.00 | 0.48 | 0.16 | 10 | Endothelial Cells |
| <i>CXorf36</i>  | 0.53 | 0.00 | 0.00 | 0.40 | 0.07 | 10 | Endothelial Cells |
| <i>ERG</i>      | 0.53 | 0.00 | 0.00 | 0.41 | 0.11 | 10 | Endothelial Cells |
| <i>COX17</i>    | 0.53 | 0.00 | 0.00 | 0.61 | 0.35 | 10 | Endothelial Cells |
| <i>CAPNS1</i>   | 0.53 | 0.00 | 0.00 | 0.56 | 0.29 | 10 | Endothelial Cells |
| <i>KANK3</i>    | 0.53 | 0.00 | 0.00 | 0.45 | 0.14 | 10 | Endothelial Cells |
| <i>ETS2</i>     | 0.52 | 0.00 | 0.00 | 0.58 | 0.27 | 10 | Endothelial Cells |
| <i>SCARF1</i>   | 0.52 | 0.00 | 0.00 | 0.33 | 0.08 | 10 | Endothelial Cells |
| <i>HSPA5</i>    | 0.52 | 0.00 | 0.00 | 0.72 | 0.49 | 10 | Endothelial Cells |
| <i>EIF2S2</i>   | 0.52 | 0.00 | 0.00 | 0.70 | 0.47 | 10 | Endothelial Cells |
| <i>ITGB4</i>    | 0.52 | 0.00 | 0.00 | 0.27 | 0.01 | 10 | Endothelial Cells |
| <i>ACVRL1</i>   | 0.51 | 0.00 | 0.00 | 0.55 | 0.16 | 10 | Endothelial Cells |
| <i>HS3ST1</i>   | 0.51 | 0.00 | 0.00 | 0.25 | 0.05 | 10 | Endothelial Cells |
| <i>NOP10</i>    | 0.51 | 0.00 | 0.00 | 0.77 | 0.48 | 10 | Endothelial Cells |
| <i>MYCT1</i>    | 0.51 | 0.00 | 0.00 | 0.31 | 0.06 | 10 | Endothelial Cells |
| <i>FABP5</i>    | 0.51 | 0.00 | 0.00 | 0.59 | 0.26 | 10 | Endothelial Cells |
| <i>ARHGAP23</i> | 0.51 | 0.00 | 0.00 | 0.27 | 0.03 | 10 | Endothelial Cells |
| <i>FAM171A1</i> | 0.5  | 0.00 | 0.00 | 0.30 | 0.06 | 10 | Endothelial Cells |
| <i>PLK2</i>     | 0.5  | 0.00 | 0.00 | 0.47 | 0.20 | 10 | Endothelial Cells |
| <i>CASKIN2</i>  | 0.5  | 0.00 | 0.00 | 0.38 | 0.09 | 10 | Endothelial Cells |
| <i>LRRC32</i>   | 0.5  | 0.00 | 0.00 | 0.44 | 0.12 | 10 | Endothelial Cells |
| <i>NECTIN2</i>  | 0.5  | 0.00 | 0.00 | 0.50 | 0.24 | 10 | Endothelial Cells |
| <i>COL9A3</i>   | 0.5  | 0.00 | 0.00 | 0.30 | 0.02 | 10 | Endothelial Cells |
| <i>IFI44L</i>   | 0.5  | 0.00 | 0.00 | 0.29 | 0.04 | 10 | Endothelial Cells |
| <i>ABI3</i>     | 0.5  | 0.00 | 0.00 | 0.35 | 0.09 | 10 | Endothelial Cells |
| <i>KPNA2</i>    | 0.5  | 0.00 | 0.00 | 0.30 | 0.08 | 10 | Endothelial Cells |
| <i>TXN</i>      | 0.5  | 0.00 | 0.00 | 0.76 | 0.55 | 10 | Endothelial Cells |
| <i>RAPGEF5</i>  | 0.5  | 0.00 | 0.00 | 0.39 | 0.13 | 10 | Endothelial Cells |
| <i>GNG5</i>     | 0.5  | 0.00 | 0.00 | 0.76 | 0.52 | 10 | Endothelial Cells |
| <i>B2M</i>      | 0.5  | 0.00 | 0.00 | 1.00 | 0.99 | 10 | Endothelial Cells |
| <i>POSTN</i>    | 0.5  | 0.00 | 0.00 | 0.50 | 0.21 | 10 | Endothelial Cells |
| <i>RASIP1</i>   | 0.5  | 0.00 | 0.00 | 0.38 | 0.09 | 10 | Endothelial Cells |
| <i>HSPA12B</i>  | 0.49 | 0.00 | 0.00 | 0.38 | 0.09 | 10 | Endothelial Cells |
| <i>PIM3</i>     | 0.49 | 0.00 | 0.00 | 0.38 | 0.17 | 10 | Endothelial Cells |
| <i>INO80C</i>   | 0.49 | 0.00 | 0.00 | 0.34 | 0.10 | 10 | Endothelial Cells |
| <i>TSPAN9</i>   | 0.49 | 0.00 | 0.00 | 0.36 | 0.10 | 10 | Endothelial Cells |
| <i>PLSCR1</i>   | 0.49 | 0.00 | 0.00 | 0.45 | 0.17 | 10 | Endothelial Cells |

|                    |      |      |      |      |      |    |                   |
|--------------------|------|------|------|------|------|----|-------------------|
| <i>WNK1</i>        | 0.49 | 0.00 | 0.00 | 0.36 | 0.14 | 10 | Endothelial Cells |
| <i>IFI16</i>       | 0.49 | 0.00 | 0.00 | 0.56 | 0.34 | 10 | Endothelial Cells |
| <i>SULF2</i>       | 0.49 | 0.00 | 0.00 | 0.31 | 0.04 | 10 | Endothelial Cells |
| <i>CDH5</i>        | 0.49 | 0.00 | 0.00 | 0.62 | 0.18 | 10 | Endothelial Cells |
| <i>MYH9</i>        | 0.49 | 0.00 | 0.00 | 0.73 | 0.44 | 10 | Endothelial Cells |
| <i>HHEX</i>        | 0.49 | 0.00 | 0.00 | 0.35 | 0.09 | 10 | Endothelial Cells |
| <i>BCAM</i>        | 0.48 | 0.00 | 0.00 | 0.71 | 0.33 | 10 | Endothelial Cells |
| <i>SHE</i>         | 0.48 | 0.00 | 0.00 | 0.33 | 0.05 | 10 | Endothelial Cells |
| <i>MSN</i>         | 0.48 | 0.00 | 0.00 | 0.69 | 0.46 | 10 | Endothelial Cells |
| <i>RAC1</i>        | 0.48 | 0.00 | 0.00 | 0.92 | 0.81 | 10 | Endothelial Cells |
| <i>GIMAP4</i>      | 0.48 | 0.00 | 0.00 | 0.55 | 0.18 | 10 | Endothelial Cells |
| <i>TMEM88</i>      | 0.48 | 0.00 | 0.00 | 0.35 | 0.08 | 10 | Endothelial Cells |
| <i>CD47</i>        | 0.48 | 0.00 | 0.00 | 0.51 | 0.21 | 10 | Endothelial Cells |
| <i>ITGA3</i>       | 0.48 | 0.00 | 0.00 | 0.39 | 0.10 | 10 | Endothelial Cells |
| <i>TNXB</i>        | 0.48 | 0.00 | 0.00 | 0.32 | 0.08 | 10 | Endothelial Cells |
| <i>LGALS9</i>      | 0.47 | 0.00 | 0.00 | 0.37 | 0.10 | 10 | Endothelial Cells |
| <i>DDIT4</i>       | 0.47 | 0.00 | 0.00 | 0.38 | 0.16 | 10 | Endothelial Cells |
| <i>CLSTN3</i>      | 0.47 | 0.00 | 0.00 | 0.27 | 0.03 | 10 | Endothelial Cells |
| <i>SERPINH1</i>    | 0.47 | 0.00 | 0.00 | 0.82 | 0.57 | 10 | Endothelial Cells |
| <i>PARVB</i>       | 0.47 | 0.00 | 0.00 | 0.41 | 0.15 | 10 | Endothelial Cells |
| <i>C1orf115</i>    | 0.47 | 0.00 | 0.00 | 0.31 | 0.05 | 10 | Endothelial Cells |
| <i>ITGA6</i>       | 0.47 | 0.00 | 0.00 | 0.32 | 0.07 | 10 | Endothelial Cells |
| <i>DNAJA1</i>      | 0.47 | 0.00 | 0.00 | 0.67 | 0.48 | 10 | Endothelial Cells |
| <i>DYNLL1</i>      | 0.47 | 0.00 | 0.00 | 0.89 | 0.79 | 10 | Endothelial Cells |
| <i>SOX7</i>        | 0.46 | 0.00 | 0.00 | 0.36 | 0.08 | 10 | Endothelial Cells |
| <i>VAMP5</i>       | 0.46 | 0.00 | 0.00 | 0.82 | 0.51 | 10 | Endothelial Cells |
| <i>PDLIM4</i>      | 0.46 | 0.00 | 0.00 | 0.34 | 0.10 | 10 | Endothelial Cells |
| <i>NEAT1</i>       | 0.46 | 0.00 | 0.00 | 0.84 | 0.63 | 10 | Endothelial Cells |
| <i>SERTAD4-AS1</i> | 0.46 | 0.00 | 0.00 | 0.27 | 0.05 | 10 | Endothelial Cells |
| <i>RALGAPA2</i>    | 0.46 | 0.00 | 0.00 | 0.28 | 0.05 | 10 | Endothelial Cells |
| <i>SDPR</i>        | 0.46 | 0.00 | 0.00 | 0.64 | 0.24 | 10 | Endothelial Cells |
| <i>HDAC1</i>       | 0.46 | 0.00 | 0.00 | 0.37 | 0.17 | 10 | Endothelial Cells |
| <i>S100A6</i>      | 0.46 | 0.00 | 0.00 | 0.99 | 0.84 | 10 | Endothelial Cells |
| <i>SH3BGRL3</i>    | 0.46 | 0.00 | 0.00 | 0.88 | 0.58 | 10 | Endothelial Cells |
| <i>AHR</i>         | 0.46 | 0.00 | 0.00 | 0.36 | 0.12 | 10 | Endothelial Cells |
| <i>SLC3A2</i>      | 0.46 | 0.00 | 0.00 | 0.49 | 0.23 | 10 | Endothelial Cells |
| <i>TIE1</i>        | 0.45 | 0.00 | 0.00 | 0.47 | 0.14 | 10 | Endothelial Cells |
| <i>PDLIM1</i>      | 0.45 | 0.00 | 0.00 | 0.56 | 0.39 | 10 | Endothelial Cells |
| <i>GIMAP6</i>      | 0.45 | 0.00 | 0.00 | 0.34 | 0.08 | 10 | Endothelial Cells |
| <i>ADAMTS6</i>     | 0.45 | 0.00 | 0.00 | 0.31 | 0.12 | 10 | Endothelial Cells |
| <i>INPP1</i>       | 0.45 | 0.00 | 0.00 | 0.35 | 0.10 | 10 | Endothelial Cells |
| <i>RASSF9</i>      | 0.45 | 0.00 | 0.00 | 0.25 | 0.02 | 10 | Endothelial Cells |

|                     |      |      |      |      |      |    |                   |
|---------------------|------|------|------|------|------|----|-------------------|
| <i>PCDH12</i>       | 0.45 | 0.00 | 0.00 | 0.34 | 0.09 | 10 | Endothelial Cells |
| <i>SHISA5</i>       | 0.45 | 0.00 | 0.00 | 0.52 | 0.26 | 10 | Endothelial Cells |
| <i>NAA10</i>        | 0.44 | 0.00 | 0.00 | 0.51 | 0.30 | 10 | Endothelial Cells |
| <i>GRN</i>          | 0.44 | 0.00 | 0.00 | 0.69 | 0.40 | 10 | Endothelial Cells |
| <i>ACTN4</i>        | 0.44 | 0.00 | 0.00 | 0.64 | 0.40 | 10 | Endothelial Cells |
| <i>PLEC</i>         | 0.43 | 0.00 | 0.00 | 0.40 | 0.16 | 10 | Endothelial Cells |
| <i>FOXO1</i>        | 0.43 | 0.00 | 0.00 | 0.27 | 0.06 | 10 | Endothelial Cells |
| <i>PON2</i>         | 0.43 | 0.00 | 0.00 | 0.53 | 0.24 | 10 | Endothelial Cells |
| <i>B4GALT5</i>      | 0.43 | 0.00 | 0.00 | 0.27 | 0.05 | 10 | Endothelial Cells |
| <i>TMEM176A</i>     | 0.43 | 0.00 | 0.00 | 0.36 | 0.12 | 10 | Endothelial Cells |
| <i>MAP3K11</i>      | 0.42 | 0.00 | 0.00 | 0.41 | 0.15 | 10 | Endothelial Cells |
| <i>RP4-725G10.3</i> | 0.42 | 0.00 | 0.00 | 0.27 | 0.05 | 10 | Endothelial Cells |
| <i>STMN1</i>        | 0.42 | 0.00 | 0.00 | 0.75 | 0.52 | 10 | Endothelial Cells |
| <i>TMBIM1</i>       | 0.42 | 0.00 | 0.00 | 0.46 | 0.24 | 10 | Endothelial Cells |
| <i>FIS1</i>         | 0.42 | 0.00 | 0.00 | 0.74 | 0.50 | 10 | Endothelial Cells |
| <i>SEMA6A</i>       | 0.42 | 0.00 | 0.00 | 0.34 | 0.07 | 10 | Endothelial Cells |
| <i>SPTBN1</i>       | 0.42 | 0.00 | 0.00 | 0.69 | 0.42 | 10 | Endothelial Cells |
| <i>ACTN1</i>        | 0.42 | 0.00 | 0.00 | 0.71 | 0.44 | 10 | Endothelial Cells |
| <i>RRAS</i>         | 0.42 | 0.00 | 0.00 | 0.40 | 0.15 | 10 | Endothelial Cells |
| <i>SLC9A3R2</i>     | 0.42 | 0.00 | 0.00 | 0.72 | 0.40 | 10 | Endothelial Cells |
| <i>YES1</i>         | 0.42 | 0.00 | 0.00 | 0.36 | 0.11 | 10 | Endothelial Cells |
| <i>DLL1</i>         | 0.42 | 0.00 | 0.00 | 0.25 | 0.04 | 10 | Endothelial Cells |
| <i>IFI6</i>         | 0.41 | 0.00 | 0.00 | 0.52 | 0.26 | 10 | Endothelial Cells |
| <i>MAGEH1</i>       | 0.41 | 0.00 | 0.00 | 0.51 | 0.27 | 10 | Endothelial Cells |
| <i>GAPDH</i>        | 0.41 | 0.00 | 0.00 | 0.96 | 0.89 | 10 | Endothelial Cells |
| <i>POLR2L</i>       | 0.41 | 0.00 | 0.00 | 0.80 | 0.67 | 10 | Endothelial Cells |
| <i>HSPA1A</i>       | 0.41 | 0.00 | 0.00 | 0.79 | 0.64 | 10 | Endothelial Cells |
| <i>SMAGP</i>        | 0.41 | 0.00 | 0.00 | 0.32 | 0.07 | 10 | Endothelial Cells |
| <i>VAT1</i>         | 0.41 | 0.00 | 0.00 | 0.41 | 0.17 | 10 | Endothelial Cells |
| <i>LSR</i>          | 0.41 | 0.00 | 0.00 | 0.34 | 0.10 | 10 | Endothelial Cells |
| <i>HSPB8</i>        | 0.41 | 0.00 | 0.00 | 0.32 | 0.11 | 10 | Endothelial Cells |
| <i>TRIB2</i>        | 0.4  | 0.00 | 0.00 | 0.30 | 0.10 | 10 | Endothelial Cells |
| <i>PRKCH</i>        | 0.4  | 0.00 | 0.00 | 0.34 | 0.09 | 10 | Endothelial Cells |
| <i>PRDX1</i>        | 0.4  | 0.00 | 0.00 | 0.77 | 0.66 | 10 | Endothelial Cells |
| <i>AGRN</i>         | 0.4  | 0.00 | 0.00 | 0.28 | 0.07 | 10 | Endothelial Cells |
| <i>PALM</i>         | 0.4  | 0.00 | 0.00 | 0.35 | 0.11 | 10 | Endothelial Cells |
| <i>DPYSL3</i>       | 0.4  | 0.00 | 0.00 | 0.36 | 0.15 | 10 | Endothelial Cells |
| <i>MAPK3</i>        | 0.4  | 0.00 | 0.00 | 0.40 | 0.16 | 10 | Endothelial Cells |
| <i>LMO2</i>         | 0.4  | 0.00 | 0.00 | 0.33 | 0.09 | 10 | Endothelial Cells |
| <i>CANX</i>         | 0.4  | 0.00 | 0.00 | 0.63 | 0.40 | 10 | Endothelial Cells |
| <i>LAMB2</i>        | 0.39 | 0.00 | 0.00 | 0.39 | 0.20 | 10 | Endothelial Cells |
| <i>PDIA3</i>        | 0.39 | 0.00 | 0.00 | 0.74 | 0.58 | 10 | Endothelial Cells |

|                   |      |      |      |      |      |    |                   |
|-------------------|------|------|------|------|------|----|-------------------|
| <i>NUCB2</i>      | 0.39 | 0.00 | 0.00 | 0.45 | 0.25 | 10 | Endothelial Cells |
| <i>DLC1</i>       | 0.39 | 0.00 | 0.00 | 0.43 | 0.23 | 10 | Endothelial Cells |
| <i>CTNND1</i>     | 0.39 | 0.00 | 0.00 | 0.51 | 0.25 | 10 | Endothelial Cells |
| <i>NRP1</i>       | 0.39 | 0.00 | 0.00 | 0.47 | 0.20 | 10 | Endothelial Cells |
| <i>IGF2BP2</i>    | 0.39 | 0.00 | 0.00 | 0.37 | 0.15 | 10 | Endothelial Cells |
| <i>RCAN1</i>      | 0.38 | 0.00 | 0.00 | 0.28 | 0.12 | 10 | Endothelial Cells |
| <i>IL6ST</i>      | 0.38 | 0.00 | 0.00 | 0.46 | 0.26 | 10 | Endothelial Cells |
| <i>PSMB9</i>      | 0.38 | 0.00 | 0.00 | 0.53 | 0.21 | 10 | Endothelial Cells |
| <i>EGLN2</i>      | 0.38 | 0.00 | 0.00 | 0.41 | 0.19 | 10 | Endothelial Cells |
| <i>MESDC2</i>     | 0.38 | 0.00 | 0.00 | 0.49 | 0.27 | 10 | Endothelial Cells |
| <i>TMEM2</i>      | 0.38 | 0.00 | 0.00 | 0.25 | 0.08 | 10 | Endothelial Cells |
| <i>CFLAR</i>      | 0.38 | 0.00 | 0.00 | 0.45 | 0.26 | 10 | Endothelial Cells |
| <i>YWHAE</i>      | 0.38 | 0.00 | 0.00 | 0.82 | 0.63 | 10 | Endothelial Cells |
| <i>APP</i>        | 0.38 | 0.00 | 0.00 | 0.77 | 0.51 | 10 | Endothelial Cells |
| <i>SPTLC2</i>     | 0.38 | 0.00 | 0.00 | 0.28 | 0.09 | 10 | Endothelial Cells |
| <i>GADD45GIP1</i> | 0.37 | 0.00 | 0.00 | 0.73 | 0.54 | 10 | Endothelial Cells |
| <i>PPP2R5A</i>    | 0.37 | 0.00 | 0.00 | 0.29 | 0.10 | 10 | Endothelial Cells |
| <i>RCN1</i>       | 0.37 | 0.00 | 0.01 | 0.58 | 0.38 | 10 | Endothelial Cells |
| <i>HLA-C</i>      | 0.37 | 0.00 | 0.00 | 0.90 | 0.54 | 10 | Endothelial Cells |
| <i>SHC1</i>       | 0.37 | 0.00 | 0.00 | 0.29 | 0.10 | 10 | Endothelial Cells |
| <i>CARD16</i>     | 0.37 | 0.00 | 0.00 | 0.58 | 0.28 | 10 | Endothelial Cells |
| <i>SEC61G</i>     | 0.37 | 0.00 | 0.00 | 0.86 | 0.68 | 10 | Endothelial Cells |
| <i>ATOX1</i>      | 0.37 | 0.00 | 0.00 | 0.60 | 0.40 | 10 | Endothelial Cells |
| <i>HN1</i>        | 0.37 | 0.00 | 0.00 | 0.38 | 0.19 | 10 | Endothelial Cells |
| <i>ATP5E</i>      | 0.36 | 0.00 | 0.00 | 0.99 | 0.87 | 10 | Endothelial Cells |
| <i>ANXA1</i>      | 0.36 | 0.00 | 0.00 | 0.73 | 0.40 | 10 | Endothelial Cells |
| <i>MDK</i>        | 0.36 | 0.00 | 0.00 | 0.75 | 0.53 | 10 | Endothelial Cells |
| <i>EGLN3</i>      | 0.36 | 0.00 | 0.00 | 0.30 | 0.08 | 10 | Endothelial Cells |
| <i>TMEM179B</i>   | 0.36 | 0.00 | 0.00 | 0.51 | 0.27 | 10 | Endothelial Cells |
| <i>CLEC3B</i>     | 0.36 | 0.00 | 0.00 | 0.27 | 0.05 | 10 | Endothelial Cells |
| <i>SNRPG</i>      | 0.36 | 0.00 | 0.00 | 0.70 | 0.53 | 10 | Endothelial Cells |
| <i>KRAS</i>       | 0.36 | 0.00 | 0.00 | 0.33 | 0.14 | 10 | Endothelial Cells |
| <i>CCDC85B</i>    | 0.35 | 0.00 | 0.00 | 0.67 | 0.41 | 10 | Endothelial Cells |
| <i>GRAMD1A</i>    | 0.35 | 0.00 | 0.00 | 0.34 | 0.14 | 10 | Endothelial Cells |
| <i>FAM65A</i>     | 0.35 | 0.00 | 0.00 | 0.30 | 0.09 | 10 | Endothelial Cells |
| <i>PSMD14</i>     | 0.35 | 0.00 | 0.00 | 0.34 | 0.17 | 10 | Endothelial Cells |
| <i>DOCK6</i>      | 0.35 | 0.00 | 0.00 | 0.32 | 0.15 | 10 | Endothelial Cells |
| <i>FNDC3B</i>     | 0.35 | 0.00 | 0.00 | 0.36 | 0.14 | 10 | Endothelial Cells |
| <i>NPR3</i>       | 0.35 | 0.00 | 0.00 | 0.29 | 0.09 | 10 | Endothelial Cells |
| <i>NUCB1</i>      | 0.35 | 0.00 | 0.01 | 0.60 | 0.42 | 10 | Endothelial Cells |
| <i>TTYH3</i>      | 0.35 | 0.00 | 0.00 | 0.27 | 0.07 | 10 | Endothelial Cells |
| <i>GIMAP1</i>     | 0.35 | 0.00 | 0.00 | 0.34 | 0.10 | 10 | Endothelial Cells |
| <i>PDIA4</i>      | 0.35 | 0.00 | 0.01 | 0.47 | 0.28 | 10 | Endothelial Cells |

|                 |      |      |      |      |      |    |                   |
|-----------------|------|------|------|------|------|----|-------------------|
| <i>NXN</i>      | 0.35 | 0.00 | 0.00 | 0.28 | 0.07 | 10 | Endothelial Cells |
| <i>PIK3C2A</i>  | 0.35 | 0.00 | 0.00 | 0.26 | 0.09 | 10 | Endothelial Cells |
| <i>RPS28</i>    | 0.35 | 0.00 | 0.00 | 1.00 | 0.99 | 10 | Endothelial Cells |
| <i>SERINC3</i>  | 0.35 | 0.00 | 0.00 | 0.43 | 0.24 | 10 | Endothelial Cells |
| <i>CTNNA1</i>   | 0.35 | 0.00 | 0.00 | 0.55 | 0.34 | 10 | Endothelial Cells |
| <i>GNG11</i>    | 0.35 | 0.00 | 0.00 | 0.82 | 0.44 | 10 | Endothelial Cells |
| <i>CLIC2</i>    | 0.35 | 0.00 | 0.00 | 0.25 | 0.05 | 10 | Endothelial Cells |
| <i>GOSR2</i>    | 0.34 | 0.00 | 0.00 | 0.26 | 0.08 | 10 | Endothelial Cells |
| <i>TUBB4B</i>   | 0.34 | 0.00 | 0.00 | 0.60 | 0.40 | 10 | Endothelial Cells |
| <i>NPC2</i>     | 0.34 | 0.00 | 0.00 | 0.69 | 0.50 | 10 | Endothelial Cells |
| <i>KRTCAP2</i>  | 0.34 | 0.00 | 0.00 | 0.77 | 0.54 | 10 | Endothelial Cells |
| <i>RRBP1</i>    | 0.34 | 0.00 | 0.00 | 0.54 | 0.32 | 10 | Endothelial Cells |
| <i>HLA-E</i>    | 0.34 | 0.00 | 0.00 | 0.96 | 0.59 | 10 | Endothelial Cells |
| <i>TMSB4X</i>   | 0.34 | 0.00 | 0.00 | 0.99 | 1.00 | 10 | Endothelial Cells |
| <i>VWA1</i>     | 0.34 | 0.00 | 0.00 | 0.29 | 0.09 | 10 | Endothelial Cells |
| <i>NME1</i>     | 0.34 | 0.00 | 0.00 | 0.47 | 0.25 | 10 | Endothelial Cells |
| <i>TFPI</i>     | 0.34 | 0.00 | 0.00 | 0.66 | 0.43 | 10 | Endothelial Cells |
| <i>FLYWCH2</i>  | 0.34 | 0.00 | 0.00 | 0.36 | 0.16 | 10 | Endothelial Cells |
| <i>PPIA</i>     | 0.34 | 0.00 | 0.00 | 0.95 | 0.84 | 10 | Endothelial Cells |
| <i>SH2D3C</i>   | 0.34 | 0.00 | 0.00 | 0.29 | 0.12 | 10 | Endothelial Cells |
| <i>PTPRM</i>    | 0.33 | 0.00 | 0.00 | 0.30 | 0.08 | 10 | Endothelial Cells |
| <i>NMI</i>      | 0.33 | 0.00 | 0.00 | 0.34 | 0.12 | 10 | Endothelial Cells |
| <i>G6PC3</i>    | 0.33 | 0.00 | 0.00 | 0.29 | 0.11 | 10 | Endothelial Cells |
| <i>MGST2</i>    | 0.33 | 0.00 | 0.00 | 0.47 | 0.26 | 10 | Endothelial Cells |
| <i>THSD1</i>    | 0.33 | 0.00 | 0.00 | 0.28 | 0.09 | 10 | Endothelial Cells |
| <i>BCAP31</i>   | 0.33 | 0.00 | 0.00 | 0.59 | 0.37 | 10 | Endothelial Cells |
| <i>TSPAN18</i>  | 0.33 | 0.00 | 0.00 | 0.25 | 0.08 | 10 | Endothelial Cells |
| <i>NKTR</i>     | 0.33 | 0.00 | 0.00 | 0.62 | 0.39 | 10 | Endothelial Cells |
| <i>ZMIZ1</i>    | 0.33 | 0.00 | 0.00 | 0.26 | 0.09 | 10 | Endothelial Cells |
| <i>ID3</i>      | 0.33 | 0.00 | 0.02 | 0.75 | 0.54 | 10 | Endothelial Cells |
| <i>LDHA</i>     | 0.33 | 0.00 | 0.00 | 0.73 | 0.58 | 10 | Endothelial Cells |
| <i>TNKS1BP1</i> | 0.33 | 0.00 | 0.00 | 0.27 | 0.08 | 10 | Endothelial Cells |
| <i>C16orf45</i> | 0.33 | 0.00 | 0.00 | 0.32 | 0.14 | 10 | Endothelial Cells |
| <i>ARRB1</i>    | 0.33 | 0.00 | 0.00 | 0.27 | 0.08 | 10 | Endothelial Cells |
| <i>ADAR</i>     | 0.32 | 0.00 | 0.00 | 0.44 | 0.23 | 10 | Endothelial Cells |
| <i>AP2S1</i>    | 0.32 | 0.00 | 0.01 | 0.63 | 0.45 | 10 | Endothelial Cells |
| <i>PSMA4</i>    | 0.32 | 0.00 | 0.01 | 0.77 | 0.58 | 10 | Endothelial Cells |
| <i>ITM2A</i>    | 0.32 | 0.00 | 0.00 | 0.59 | 0.18 | 10 | Endothelial Cells |
| <i>LYST</i>     | 0.32 | 0.00 | 0.00 | 0.27 | 0.07 | 10 | Endothelial Cells |
| <i>KIAA0355</i> | 0.32 | 0.00 | 0.00 | 0.38 | 0.17 | 10 | Endothelial Cells |
| <i>PTPRG</i>    | 0.32 | 0.00 | 0.00 | 0.30 | 0.10 | 10 | Endothelial Cells |
| <i>JAG1</i>     | 0.32 | 0.00 | 0.00 | 0.26 | 0.11 | 10 | Endothelial Cells |
| <i>APOL3</i>    | 0.32 | 0.00 | 0.00 | 0.34 | 0.12 | 10 | Endothelial Cells |

|                   |      |      |      |      |      |    |                   |
|-------------------|------|------|------|------|------|----|-------------------|
| <i>PDLIM5</i>     | 0.32 | 0.00 | 0.00 | 0.32 | 0.16 | 10 | Endothelial Cells |
| <i>ZNF521</i>     | 0.31 | 0.00 | 0.00 | 0.27 | 0.07 | 10 | Endothelial Cells |
| <i>NFE2L1</i>     | 0.31 | 0.00 | 0.00 | 0.32 | 0.13 | 10 | Endothelial Cells |
| <i>HDAC7</i>      | 0.31 | 0.00 | 0.00 | 0.34 | 0.16 | 10 | Endothelial Cells |
| <i>MRPL57</i>     | 0.31 | 0.00 | 0.01 | 0.56 | 0.35 | 10 | Endothelial Cells |
| <i>FAM89B</i>     | 0.31 | 0.00 | 0.01 | 0.31 | 0.15 | 10 | Endothelial Cells |
| <i>SERF2</i>      | 0.31 | 0.00 | 0.00 | 0.96 | 0.95 | 10 | Endothelial Cells |
| <i>TAP1</i>       | 0.31 | 0.00 | 0.00 | 0.32 | 0.12 | 10 | Endothelial Cells |
| <i>SEC11C</i>     | 0.31 | 0.00 | 0.00 | 0.34 | 0.12 | 10 | Endothelial Cells |
| <i>PSME2</i>      | 0.31 | 0.00 | 0.00 | 0.67 | 0.45 | 10 | Endothelial Cells |
| <i>CFL1</i>       | 0.31 | 0.00 | 0.00 | 0.97 | 0.91 | 10 | Endothelial Cells |
| <i>ANGPTL4</i>    | 0.31 | 0.00 | 0.00 | 0.31 | 0.14 | 10 | Endothelial Cells |
| <i>ELOVL1</i>     | 0.3  | 0.00 | 0.00 | 0.33 | 0.14 | 10 | Endothelial Cells |
| <i>TNIP1</i>      | 0.3  | 0.00 | 0.02 | 0.36 | 0.19 | 10 | Endothelial Cells |
| <i>TNFAIP1</i>    | 0.3  | 0.00 | 0.00 | 0.29 | 0.09 | 10 | Endothelial Cells |
| <i>LINC00116</i>  | 0.3  | 0.00 | 0.00 | 0.35 | 0.17 | 10 | Endothelial Cells |
| <i>TSPAN14</i>    | 0.3  | 0.00 | 0.00 | 0.33 | 0.14 | 10 | Endothelial Cells |
| <i>DCTPP1</i>     | 0.3  | 0.00 | 0.00 | 0.32 | 0.15 | 10 | Endothelial Cells |
| <i>NPNT</i>       | 0.3  | 0.00 | 0.00 | 0.30 | 0.10 | 10 | Endothelial Cells |
| <i>WWTR1</i>      | 0.3  | 0.00 | 0.00 | 0.38 | 0.20 | 10 | Endothelial Cells |
| <i>MCAM</i>       | 0.29 | 0.00 | 0.00 | 0.43 | 0.23 | 10 | Endothelial Cells |
| <i>EIF1</i>       | 0.29 | 0.00 | 0.00 | 0.97 | 0.96 | 10 | Endothelial Cells |
| <i>PSMB8</i>      | 0.29 | 0.00 | 0.00 | 0.49 | 0.26 | 10 | Endothelial Cells |
| <i>C10orf54</i>   | 0.29 | 0.00 | 0.00 | 0.42 | 0.20 | 10 | Endothelial Cells |
| <i>RPN2</i>       | 0.29 | 0.00 | 0.01 | 0.57 | 0.38 | 10 | Endothelial Cells |
| <i>PEAK1</i>      | 0.29 | 0.00 | 0.00 | 0.26 | 0.10 | 10 | Endothelial Cells |
| <i>YBX3</i>       | 0.29 | 0.00 | 0.03 | 0.60 | 0.40 | 10 | Endothelial Cells |
| <i>PXN</i>        | 0.29 | 0.00 | 0.00 | 0.30 | 0.10 | 10 | Endothelial Cells |
| <i>BOLA3</i>      | 0.29 | 0.00 | 0.00 | 0.30 | 0.14 | 10 | Endothelial Cells |
| <i>SERPINE2</i>   | 0.28 | 0.00 | 0.00 | 0.45 | 0.17 | 10 | Endothelial Cells |
| <i>IGFBP7</i>     | 0.28 | 0.00 | 0.00 | 0.90 | 0.67 | 10 | Endothelial Cells |
| <i>PSME2P2</i>    | 0.28 | 0.00 | 0.00 | 0.40 | 0.21 | 10 | Endothelial Cells |
| <i>SDF2L1</i>     | 0.28 | 0.00 | 0.01 | 0.40 | 0.23 | 10 | Endothelial Cells |
| <i>VAMP3</i>      | 0.28 | 0.00 | 0.01 | 0.45 | 0.26 | 10 | Endothelial Cells |
| <i>SNX3</i>       | 0.28 | 0.00 | 0.00 | 0.80 | 0.69 | 10 | Endothelial Cells |
| <i>IER5</i>       | 0.28 | 0.00 | 0.00 | 0.27 | 0.11 | 10 | Endothelial Cells |
| <i>CDV3</i>       | 0.28 | 0.00 | 0.02 | 0.31 | 0.16 | 10 | Endothelial Cells |
| <i>PRAF2</i>      | 0.28 | 0.00 | 0.00 | 0.36 | 0.17 | 10 | Endothelial Cells |
| <i>XIST</i>       | 0.28 | 0.00 | 0.01 | 0.84 | 0.70 | 10 | Endothelial Cells |
| <i>AC012354.8</i> | 0.28 | 0.00 | 0.04 | 0.36 | 0.20 | 10 | Endothelial Cells |
| <i>DNAJB11</i>    | 0.28 | 0.00 | 0.02 | 0.40 | 0.23 | 10 | Endothelial Cells |
| <i>PSMA7</i>      | 0.28 | 0.00 | 0.00 | 0.86 | 0.71 | 10 | Endothelial Cells |
| <i>RNF181</i>     | 0.27 | 0.00 | 0.00 | 0.62 | 0.39 | 10 | Endothelial Cells |

|                      |      |      |      |      |      |    |                      |
|----------------------|------|------|------|------|------|----|----------------------|
| <i>RPL36</i>         | 0.27 | 0.00 | 0.00 | 1.00 | 0.98 | 10 | Endothelial Cells    |
| <i>LUZP1</i>         | 0.27 | 0.00 | 0.00 | 0.36 | 0.18 | 10 | Endothelial Cells    |
| <i>FYN</i>           | 0.27 | 0.00 | 0.00 | 0.30 | 0.13 | 10 | Endothelial Cells    |
| <i>COX16</i>         | 0.27 | 0.00 | 0.00 | 0.35 | 0.16 | 10 | Endothelial Cells    |
| <i>PRKD2</i>         | 0.27 | 0.00 | 0.00 | 0.26 | 0.08 | 10 | Endothelial Cells    |
| <i>MVP</i>           | 0.27 | 0.00 | 0.00 | 0.32 | 0.14 | 10 | Endothelial Cells    |
| <i>ITGB1</i>         | 0.27 | 0.00 | 0.04 | 0.79 | 0.63 | 10 | Endothelial Cells    |
| <i>PPDPF</i>         | 0.26 | 0.00 | 0.03 | 0.88 | 0.80 | 10 | Endothelial Cells    |
| <i>HSPA8</i>         | 0.26 | 0.00 | 0.03 | 0.77 | 0.59 | 10 | Endothelial Cells    |
| <i>ORAI1</i>         | 0.26 | 0.00 | 0.00 | 0.25 | 0.06 | 10 | Endothelial Cells    |
| <i>ZEB1</i>          | 0.26 | 0.00 | 0.00 | 0.33 | 0.15 | 10 | Endothelial Cells    |
| <i>RBX1</i>          | 0.26 | 0.00 | 0.00 | 0.77 | 0.59 | 10 | Endothelial Cells    |
| <i>RP11-220D10.1</i> | 0.26 | 0.00 | 0.00 | 0.27 | 0.11 | 10 | Endothelial Cells    |
| <i>TMEM9B</i>        | 0.26 | 0.00 | 0.00 | 0.36 | 0.18 | 10 | Endothelial Cells    |
| <i>SWAP70</i>        | 0.26 | 0.00 | 0.00 | 0.27 | 0.10 | 10 | Endothelial Cells    |
| <i>HLA-F</i>         | 0.25 | 0.00 | 0.00 | 0.36 | 0.13 | 10 | Endothelial Cells    |
| <i>ITSN2</i>         | 0.25 | 0.00 | 0.02 | 0.32 | 0.16 | 10 | Endothelial Cells    |
| <i>OST4</i>          | 0.25 | 0.00 | 0.00 | 0.90 | 0.78 | 10 | Endothelial Cells    |
| <i>ABHD17A</i>       | 0.25 | 0.00 | 0.00 | 0.33 | 0.16 | 10 | Endothelial Cells    |
| <i>PAK4</i>          | 0.25 | 0.00 | 0.00 | 0.25 | 0.10 | 10 | Endothelial Cells    |
| <i>CCL21</i>         | 3.84 | 0.00 | 0.00 | 0.31 | 0.07 | 11 | AT1 Epithelial Cells |
| <i>TFF3</i>          | 2.03 | 0.00 | 0.00 | 0.34 | 0.01 | 11 | AT1 Epithelial Cells |
| <i>SFTPB</i>         | 2.01 | 0.00 | 0.00 | 0.27 | 0.08 | 11 | AT1 Epithelial Cells |
| <i>AGR3</i>          | 1.78 | 0.00 | 0.00 | 0.31 | 0.02 | 11 | AT1 Epithelial Cells |
| <i>AGER</i>          | 1.77 | 0.00 | 0.00 | 0.26 | 0.05 | 11 | AT1 Epithelial Cells |
| <i>ELF3</i>          | 1.58 | 0.00 | 0.00 | 0.40 | 0.02 | 11 | AT1 Epithelial Cells |
| <i>AGR2</i>          | 1.41 | 0.00 | 0.00 | 0.31 | 0.02 | 11 | AT1 Epithelial Cells |
| <i>KRT19</i>         | 1.38 | 0.00 | 0.00 | 0.34 | 0.03 | 11 | AT1 Epithelial Cells |
| <i>KRT8</i>          | 1.38 | 0.00 | 0.00 | 0.41 | 0.07 | 11 | AT1 Epithelial Cells |
| <i>FXD3</i>          | 1.36 | 0.00 | 0.00 | 0.38 | 0.02 | 11 | AT1 Epithelial Cells |
| <i>GPRC5A</i>        | 1.28 | 0.00 | 0.00 | 0.28 | 0.03 | 11 | AT1 Epithelial Cells |
| <i>KRT18</i>         | 1.17 | 0.00 | 0.00 | 0.47 | 0.12 | 11 | AT1 Epithelial Cells |
| <i>FOLR1</i>         | 1.05 | 0.00 | 0.00 | 0.31 | 0.04 | 11 | AT1 Epithelial Cells |
| <i>TUBB4B</i>        | 1.03 | 0.00 | 0.00 | 0.63 | 0.40 | 11 | AT1 Epithelial Cells |
| <i>ANXA2</i>         | 1.03 | 0.00 | 0.00 | 0.78 | 0.65 | 11 | AT1 Epithelial Cells |
| <i>LMO7</i>          | 1.02 | 0.00 | 0.00 | 0.30 | 0.08 | 11 | AT1 Epithelial Cells |
| <i>S100A10</i>       | 0.98 | 0.00 | 0.00 | 0.79 | 0.65 | 11 | AT1 Epithelial Cells |
| <i>CLDN4</i>         | 0.98 | 0.00 | 0.00 | 0.34 | 0.02 | 11 | AT1 Epithelial Cells |
| <i>DMKN</i>          | 0.97 | 0.00 | 0.00 | 0.34 | 0.03 | 11 | AT1 Epithelial Cells |
| <i>NKX2-1</i>        | 0.97 | 0.00 | 0.00 | 0.31 | 0.02 | 11 | AT1 Epithelial Cells |
| <i>C19orf33</i>      | 0.95 | 0.00 | 0.00 | 0.28 | 0.03 | 11 | AT1 Epithelial Cells |
| <i>CD24</i>          | 0.91 | 0.00 | 0.00 | 0.26 | 0.02 | 11 | AT1 Epithelial Cells |

|                  |      |      |      |      |      |    |                      |
|------------------|------|------|------|------|------|----|----------------------|
| <i>EFEMP1</i>    | 0.9  | 0.00 | 0.00 | 0.42 | 0.07 | 11 | AT1 Epithelial Cells |
| <i>TACSTD2</i>   | 0.89 | 0.00 | 0.00 | 0.28 | 0.03 | 11 | AT1 Epithelial Cells |
| <i>AQP4</i>      | 0.88 | 0.00 | 0.00 | 0.27 | 0.02 | 11 | AT1 Epithelial Cells |
| <i>MT-CO2</i>    | 0.87 | 0.00 | 0.00 | 0.95 | 0.99 | 11 | AT1 Epithelial Cells |
| <i>SDC4</i>      | 0.86 | 0.00 | 0.00 | 0.36 | 0.04 | 11 | AT1 Epithelial Cells |
| <i>CPM</i>       | 0.86 | 0.00 | 0.00 | 0.28 | 0.04 | 11 | AT1 Epithelial Cells |
| <i>IFT57</i>     | 0.85 | 0.00 | 0.00 | 0.46 | 0.21 | 11 | AT1 Epithelial Cells |
| <i>CD9</i>       | 0.85 | 0.00 | 0.00 | 0.69 | 0.45 | 11 | AT1 Epithelial Cells |
| <i>CTSH</i>      | 0.84 | 0.00 | 0.00 | 0.49 | 0.13 | 11 | AT1 Epithelial Cells |
| <i>EPCAM</i>     | 0.84 | 0.00 | 0.00 | 0.30 | 0.02 | 11 | AT1 Epithelial Cells |
| <i>MORN2</i>     | 0.83 | 0.00 | 0.00 | 0.30 | 0.07 | 11 | AT1 Epithelial Cells |
| <i>GJA1</i>      | 0.82 | 0.00 | 0.00 | 0.34 | 0.04 | 11 | AT1 Epithelial Cells |
| <i>MT-ND4</i>    | 0.82 | 0.00 | 0.00 | 0.96 | 1.00 | 11 | AT1 Epithelial Cells |
| <i>MT-ND2</i>    | 0.82 | 0.00 | 0.03 | 0.97 | 0.99 | 11 | AT1 Epithelial Cells |
| <i>TSTD1</i>     | 0.81 | 0.00 | 0.00 | 0.32 | 0.07 | 11 | AT1 Epithelial Cells |
| <i>HOPX</i>      | 0.8  | 0.00 | 0.00 | 0.27 | 0.12 | 11 | AT1 Epithelial Cells |
| <i>PRDX5</i>     | 0.8  | 0.00 | 0.00 | 0.70 | 0.56 | 11 | AT1 Epithelial Cells |
| <i>MRPS31</i>    | 0.78 | 0.00 | 0.00 | 0.30 | 0.12 | 11 | AT1 Epithelial Cells |
| <i>EFHC1</i>     | 0.76 | 0.00 | 0.00 | 0.34 | 0.15 | 11 | AT1 Epithelial Cells |
| <i>HIST1H1C</i>  | 0.75 | 0.00 | 0.00 | 0.30 | 0.09 | 11 | AT1 Epithelial Cells |
| <i>ARL4A</i>     | 0.75 | 0.00 | 0.00 | 0.35 | 0.12 | 11 | AT1 Epithelial Cells |
| <i>CD55</i>      | 0.73 | 0.00 | 0.00 | 0.37 | 0.12 | 11 | AT1 Epithelial Cells |
| <i>TSPAN13</i>   | 0.72 | 0.00 | 0.00 | 0.32 | 0.13 | 11 | AT1 Epithelial Cells |
| <i>RAB11FIP1</i> | 0.71 | 0.00 | 0.00 | 0.37 | 0.04 | 11 | AT1 Epithelial Cells |
| <i>NEAT1</i>     | 0.71 | 0.00 | 0.02 | 0.79 | 0.63 | 11 | AT1 Epithelial Cells |
| <i>VAMP8</i>     | 0.7  | 0.00 | 0.00 | 0.46 | 0.18 | 11 | AT1 Epithelial Cells |
| <i>MT-ND5</i>    | 0.66 | 0.00 | 0.00 | 0.94 | 0.89 | 11 | AT1 Epithelial Cells |
| <i>PDPN</i>      | 0.66 | 0.00 | 0.00 | 0.34 | 0.05 | 11 | AT1 Epithelial Cells |
| <i>EFNA1</i>     | 0.65 | 0.00 | 0.00 | 0.46 | 0.14 | 11 | AT1 Epithelial Cells |
| <i>CRNDE</i>     | 0.64 | 0.00 | 0.00 | 0.28 | 0.01 | 11 | AT1 Epithelial Cells |
| <i>SEC11C</i>    | 0.62 | 0.00 | 0.00 | 0.30 | 0.13 | 11 | AT1 Epithelial Cells |
| <i>PTPRF</i>     | 0.62 | 0.00 | 0.00 | 0.31 | 0.06 | 11 | AT1 Epithelial Cells |
| <i>CKB</i>       | 0.61 | 0.00 | 0.00 | 0.47 | 0.22 | 11 | AT1 Epithelial Cells |
| <i>ANXA4</i>     | 0.59 | 0.00 | 0.00 | 0.38 | 0.16 | 11 | AT1 Epithelial Cells |
| <i>CD47</i>      | 0.58 | 0.00 | 0.00 | 0.47 | 0.21 | 11 | AT1 Epithelial Cells |
| <i>ATP11A</i>    | 0.58 | 0.00 | 0.00 | 0.29 | 0.06 | 11 | AT1 Epithelial Cells |
| <i>SPINT2</i>    | 0.58 | 0.00 | 0.00 | 0.33 | 0.15 | 11 | AT1 Epithelial Cells |
| <i>CLDN7</i>     | 0.57 | 0.00 | 0.00 | 0.25 | 0.03 | 11 | AT1 Epithelial Cells |
| <i>ODF2L</i>     | 0.57 | 0.00 | 0.00 | 0.38 | 0.18 | 11 | AT1 Epithelial Cells |
| <i>DYNLT1</i>    | 0.53 | 0.00 | 0.03 | 0.60 | 0.43 | 11 | AT1 Epithelial Cells |
| <i>NRP2</i>      | 0.53 | 0.00 | 0.00 | 0.31 | 0.08 | 11 | AT1 Epithelial Cells |
| <i>TUBA1C</i>    | 0.51 | 0.00 | 0.00 | 0.34 | 0.14 | 11 | AT1 Epithelial Cells |
| <i>ELK3</i>      | 0.51 | 0.00 | 0.00 | 0.35 | 0.15 | 11 | AT1 Epithelial Cells |

|                 |      |      |      |      |      |    |                      |
|-----------------|------|------|------|------|------|----|----------------------|
| <i>LGALS3</i>   | 0.51 | 0.00 | 0.00 | 0.58 | 0.37 | 11 | AT1 Epithelial Cells |
| <i>PRKCZ</i>    | 0.51 | 0.00 | 0.00 | 0.30 | 0.02 | 11 | AT1 Epithelial Cells |
| <i>WDR34</i>    | 0.51 | 0.00 | 0.00 | 0.32 | 0.10 | 11 | AT1 Epithelial Cells |
| <i>ATP1A1</i>   | 0.51 | 0.00 | 0.00 | 0.45 | 0.21 | 11 | AT1 Epithelial Cells |
| <i>MRPL14</i>   | 0.5  | 0.00 | 0.00 | 0.50 | 0.23 | 11 | AT1 Epithelial Cells |
| <i>HSPB11</i>   | 0.49 | 0.00 | 0.00 | 0.34 | 0.17 | 11 | AT1 Epithelial Cells |
| <i>ATP5E</i>    | 0.49 | 0.00 | 0.01 | 0.81 | 0.87 | 11 | AT1 Epithelial Cells |
| <i>TXN</i>      | 0.48 | 0.00 | 0.02 | 0.67 | 0.55 | 11 | AT1 Epithelial Cells |
| <i>SMC4</i>     | 0.48 | 0.00 | 0.00 | 0.29 | 0.11 | 11 | AT1 Epithelial Cells |
| <i>C4orf48</i>  | 0.44 | 0.00 | 0.00 | 0.37 | 0.14 | 11 | AT1 Epithelial Cells |
| <i>CSTB</i>     | 0.44 | 0.00 | 0.00 | 0.71 | 0.49 | 11 | AT1 Epithelial Cells |
| <i>DNAJC10</i>  | 0.44 | 0.00 | 0.00 | 0.32 | 0.11 | 11 | AT1 Epithelial Cells |
| <i>PPFIBP1</i>  | 0.44 | 0.00 | 0.04 | 0.30 | 0.15 | 11 | AT1 Epithelial Cells |
| <i>FAM174A</i>  | 0.43 | 0.00 | 0.00 | 0.31 | 0.14 | 11 | AT1 Epithelial Cells |
| <i>ITGA3</i>    | 0.42 | 0.00 | 0.00 | 0.29 | 0.11 | 11 | AT1 Epithelial Cells |
| <i>SRI</i>      | 0.42 | 0.00 | 0.01 | 0.57 | 0.38 | 11 | AT1 Epithelial Cells |
| <i>HMGA1</i>    | 0.42 | 0.00 | 0.00 | 0.29 | 0.10 | 11 | AT1 Epithelial Cells |
| <i>MAGI1</i>    | 0.41 | 0.00 | 0.00 | 0.31 | 0.07 | 11 | AT1 Epithelial Cells |
| <i>PERP</i>     | 0.41 | 0.00 | 0.00 | 0.31 | 0.13 | 11 | AT1 Epithelial Cells |
| <i>F11R</i>     | 0.4  | 0.00 | 0.00 | 0.31 | 0.07 | 11 | AT1 Epithelial Cells |
| <i>ATXN2</i>    | 0.4  | 0.00 | 0.00 | 0.37 | 0.16 | 11 | AT1 Epithelial Cells |
| <i>PPDPF</i>    | 0.4  | 0.00 | 0.01 | 0.84 | 0.80 | 11 | AT1 Epithelial Cells |
| <i>RPA3</i>     | 0.4  | 0.00 | 0.00 | 0.31 | 0.14 | 11 | AT1 Epithelial Cells |
| <i>GLS</i>      | 0.4  | 0.00 | 0.00 | 0.25 | 0.10 | 11 | AT1 Epithelial Cells |
| <i>UCP2</i>     | 0.39 | 0.00 | 0.00 | 0.33 | 0.12 | 11 | AT1 Epithelial Cells |
| <i>GRAMD1A</i>  | 0.39 | 0.00 | 0.00 | 0.37 | 0.14 | 11 | AT1 Epithelial Cells |
| <i>SMARCA5</i>  | 0.38 | 0.00 | 0.04 | 0.37 | 0.20 | 11 | AT1 Epithelial Cells |
| <i>PCBD1</i>    | 0.38 | 0.00 | 0.00 | 0.45 | 0.21 | 11 | AT1 Epithelial Cells |
| <i>HPCAL1</i>   | 0.38 | 0.00 | 0.00 | 0.36 | 0.16 | 11 | AT1 Epithelial Cells |
| <i>C1orf198</i> | 0.37 | 0.00 | 0.01 | 0.30 | 0.14 | 11 | AT1 Epithelial Cells |
| <i>MBIP</i>     | 0.36 | 0.00 | 0.00 | 0.26 | 0.11 | 11 | AT1 Epithelial Cells |
| <i>ADD3</i>     | 0.35 | 0.00 | 0.00 | 0.45 | 0.23 | 11 | AT1 Epithelial Cells |
| <i>CLU</i>      | 0.35 | 0.00 | 0.01 | 0.56 | 0.32 | 11 | AT1 Epithelial Cells |
| <i>WNK1</i>     | 0.34 | 0.00 | 0.03 | 0.29 | 0.14 | 11 | AT1 Epithelial Cells |
| <i>ANXA2P2</i>  | 0.34 | 0.00 | 0.00 | 0.28 | 0.08 | 11 | AT1 Epithelial Cells |
| <i>HSPH1</i>    | 0.34 | 0.00 | 0.00 | 0.26 | 0.11 | 11 | AT1 Epithelial Cells |
| <i>PTP4A1</i>   | 0.33 | 0.00 | 0.00 | 0.30 | 0.12 | 11 | AT1 Epithelial Cells |
| <i>CTNNA1</i>   | 0.33 | 0.00 | 0.04 | 0.53 | 0.34 | 11 | AT1 Epithelial Cells |
| <i>FLNB</i>     | 0.33 | 0.00 | 0.00 | 0.26 | 0.06 | 11 | AT1 Epithelial Cells |
| <i>CNDP2</i>    | 0.31 | 0.00 | 0.00 | 0.29 | 0.13 | 11 | AT1 Epithelial Cells |
| <i>SHC1</i>     | 0.31 | 0.00 | 0.00 | 0.26 | 0.10 | 11 | AT1 Epithelial Cells |
| <i>FILIP1</i>   | 0.31 | 0.00 | 0.00 | 0.40 | 0.18 | 11 | AT1 Epithelial Cells |
| <i>ABHD2</i>    | 0.3  | 0.00 | 0.00 | 0.26 | 0.07 | 11 | AT1 Epithelial Cells |

|                 |      |      |      |      |      |    |                      |
|-----------------|------|------|------|------|------|----|----------------------|
| <i>UTRN</i>     | 0.3  | 0.00 | 0.00 | 0.41 | 0.18 | 11 | AT1 Epithelial Cells |
| <i>TJP2</i>     | 0.29 | 0.00 | 0.01 | 0.25 | 0.11 | 11 | AT1 Epithelial Cells |
| <i>COQ4</i>     | 0.27 | 0.00 | 0.00 | 0.34 | 0.15 | 11 | AT1 Epithelial Cells |
| <i>MLLT4</i>    | 0.27 | 0.00 | 0.00 | 0.35 | 0.17 | 11 | AT1 Epithelial Cells |
| <i>ENOSF1</i>   | 0.27 | 0.00 | 0.00 | 0.28 | 0.07 | 11 | AT1 Epithelial Cells |
| <i>FAM129B</i>  | 0.26 | 0.00 | 0.00 | 0.28 | 0.11 | 11 | AT1 Epithelial Cells |
| <i>CTSD</i>     | 0.26 | 0.00 | 0.01 | 0.53 | 0.31 | 11 | AT1 Epithelial Cells |
| <i>DPP7</i>     | 0.25 | 0.00 | 0.05 | 0.38 | 0.20 | 11 | AT1 Epithelial Cells |
| <i>SERPINE2</i> | 3.29 | 0.00 | 0.00 | 0.84 | 0.17 | 12 | Endothelial Cells    |
| <i>GLUL</i>     | 2.64 | 0.00 | 0.00 | 0.99 | 0.42 | 12 | Endothelial Cells    |
| <i>ID1</i>      | 2.17 | 0.00 | 0.00 | 0.95 | 0.34 | 12 | Endothelial Cells    |
| <i>GJA4</i>     | 2.06 | 0.00 | 0.00 | 0.91 | 0.14 | 12 | Endothelial Cells    |
| <i>SLC9A3R2</i> | 2.03 | 0.00 | 0.00 | 0.99 | 0.40 | 12 | Endothelial Cells    |
| <i>AQP1</i>     | 2.03 | 0.00 | 0.00 | 0.99 | 0.20 | 12 | Endothelial Cells    |
| <i>KCTD12</i>   | 1.99 | 0.00 | 0.00 | 0.91 | 0.23 | 12 | Endothelial Cells    |
| <i>ATP13A3</i>  | 1.95 | 0.00 | 0.00 | 0.75 | 0.05 | 12 | Endothelial Cells    |
| <i>CLEC14A</i>  | 1.83 | 0.00 | 0.00 | 0.92 | 0.19 | 12 | Endothelial Cells    |
| <i>SOX17</i>    | 1.83 | 0.00 | 0.00 | 0.72 | 0.05 | 12 | Endothelial Cells    |
| <i>SRGN</i>     | 1.82 | 0.00 | 0.00 | 0.97 | 0.22 | 12 | Endothelial Cells    |
| <i>H19</i>      | 1.82 | 0.00 | 0.00 | 0.72 | 0.15 | 12 | Endothelial Cells    |
| <i>SULT1E1</i>  | 1.77 | 0.00 | 0.00 | 0.47 | 0.05 | 12 | Endothelial Cells    |
| <i>IGF2</i>     | 1.76 | 0.00 | 0.00 | 0.69 | 0.06 | 12 | Endothelial Cells    |
| <i>GJA5</i>     | 1.72 | 0.00 | 0.00 | 0.65 | 0.06 | 12 | Endothelial Cells    |
| <i>PODXL</i>    | 1.67 | 0.00 | 0.00 | 0.73 | 0.08 | 12 | Endothelial Cells    |
| <i>CXCL12</i>   | 1.64 | 0.00 | 0.00 | 0.82 | 0.24 | 12 | Endothelial Cells    |
| <i>CD9</i>      | 1.63 | 0.00 | 0.00 | 0.92 | 0.45 | 12 | Endothelial Cells    |
| <i>HEG1</i>     | 1.62 | 0.00 | 0.00 | 0.79 | 0.13 | 12 | Endothelial Cells    |
| <i>MMRN2</i>    | 1.61 | 0.00 | 0.00 | 0.78 | 0.08 | 12 | Endothelial Cells    |
| <i>C10orf10</i> | 1.54 | 0.00 | 0.00 | 0.78 | 0.15 | 12 | Endothelial Cells    |
| <i>IFI27</i>    | 1.53 | 0.00 | 0.00 | 1.00 | 0.36 | 12 | Endothelial Cells    |
| <i>CLDN5</i>    | 1.5  | 0.00 | 0.00 | 0.95 | 0.26 | 12 | Endothelial Cells    |
| <i>STMN1</i>    | 1.5  | 0.00 | 0.00 | 0.95 | 0.52 | 12 | Endothelial Cells    |
| <i>KLF2</i>     | 1.49 | 0.00 | 0.00 | 0.73 | 0.17 | 12 | Endothelial Cells    |
| <i>TSPAN7</i>   | 1.48 | 0.00 | 0.00 | 0.75 | 0.12 | 12 | Endothelial Cells    |
| <i>ENG</i>      | 1.48 | 0.00 | 0.00 | 0.80 | 0.30 | 12 | Endothelial Cells    |
| <i>CWC27</i>    | 1.48 | 0.00 | 0.00 | 0.64 | 0.12 | 12 | Endothelial Cells    |
| <i>PECAM1</i>   | 1.46 | 0.00 | 0.00 | 0.97 | 0.25 | 12 | Endothelial Cells    |
| <i>FBLN2</i>    | 1.45 | 0.00 | 0.00 | 0.57 | 0.05 | 12 | Endothelial Cells    |
| <i>IFITM2</i>   | 1.45 | 0.00 | 0.00 | 0.98 | 0.63 | 12 | Endothelial Cells    |
| <i>PI16</i>     | 1.45 | 0.00 | 0.00 | 0.40 | 0.01 | 12 | Endothelial Cells    |
| <i>TMEM100</i>  | 1.44 | 0.00 | 0.00 | 0.77 | 0.15 | 12 | Endothelial Cells    |
| <i>TM4SF1</i>   | 1.44 | 0.00 | 0.00 | 0.97 | 0.39 | 12 | Endothelial Cells    |
| <i>NPDC1</i>    | 1.44 | 0.00 | 0.00 | 0.85 | 0.30 | 12 | Endothelial Cells    |

|                |      |      |      |      |      |    |                   |
|----------------|------|------|------|------|------|----|-------------------|
| <i>HYAL2</i>   | 1.43 | 0.00 | 0.00 | 0.87 | 0.22 | 12 | Endothelial Cells |
| <i>SULF1</i>   | 1.42 | 0.00 | 0.00 | 0.49 | 0.02 | 12 | Endothelial Cells |
| <i>SRP14</i>   | 1.42 | 0.00 | 0.00 | 1.00 | 0.92 | 12 | Endothelial Cells |
| <i>JAM2</i>    | 1.39 | 0.00 | 0.00 | 0.77 | 0.12 | 12 | Endothelial Cells |
| <i>PTPRB</i>   | 1.39 | 0.00 | 0.00 | 0.66 | 0.07 | 12 | Endothelial Cells |
| <i>EFNB2</i>   | 1.39 | 0.00 | 0.00 | 0.69 | 0.08 | 12 | Endothelial Cells |
| <i>CALCRL</i>  | 1.37 | 0.00 | 0.00 | 0.89 | 0.19 | 12 | Endothelial Cells |
| <i>RNASE1</i>  | 1.36 | 0.00 | 0.00 | 0.95 | 0.27 | 12 | Endothelial Cells |
| <i>SLC6A6</i>  | 1.33 | 0.00 | 0.00 | 0.49 | 0.04 | 12 | Endothelial Cells |
| <i>RAMP2</i>   | 1.32 | 0.00 | 0.00 | 0.99 | 0.33 | 12 | Endothelial Cells |
| <i>ADAMTS6</i> | 1.31 | 0.00 | 0.00 | 0.65 | 0.12 | 12 | Endothelial Cells |
| <i>VWF</i>     | 1.31 | 0.00 | 0.00 | 0.79 | 0.12 | 12 | Endothelial Cells |
| <i>EDN1</i>    | 1.31 | 0.00 | 0.00 | 0.75 | 0.10 | 12 | Endothelial Cells |
| <i>ADAM15</i>  | 1.3  | 0.00 | 0.00 | 0.67 | 0.11 | 12 | Endothelial Cells |
| <i>ADGRL4</i>  | 1.29 | 0.00 | 0.00 | 0.51 | 0.03 | 12 | Endothelial Cells |
| <i>CD34</i>    | 1.27 | 0.00 | 0.00 | 0.75 | 0.15 | 12 | Endothelial Cells |
| <i>ICAM2</i>   | 1.26 | 0.00 | 0.00 | 0.81 | 0.22 | 12 | Endothelial Cells |
| <i>FOXP1</i>   | 1.26 | 0.00 | 0.00 | 0.87 | 0.40 | 12 | Endothelial Cells |
| <i>SEMA3G</i>  | 1.23 | 0.00 | 0.00 | 0.53 | 0.01 | 12 | Endothelial Cells |
| <i>DKK2</i>    | 1.23 | 0.00 | 0.00 | 0.46 | 0.00 | 12 | Endothelial Cells |
| <i>ATP1B3</i>  | 1.23 | 0.00 | 0.00 | 0.75 | 0.31 | 12 | Endothelial Cells |
| <i>SOX18</i>   | 1.23 | 0.00 | 0.00 | 0.62 | 0.10 | 12 | Endothelial Cells |
| <i>BST2</i>    | 1.22 | 0.00 | 0.00 | 0.97 | 0.29 | 12 | Endothelial Cells |
| <i>EXOC6</i>   | 1.22 | 0.00 | 0.00 | 0.58 | 0.07 | 12 | Endothelial Cells |
| <i>OCIAD2</i>  | 1.21 | 0.00 | 0.00 | 0.60 | 0.14 | 12 | Endothelial Cells |
| <i>CRIP2</i>   | 1.2  | 0.00 | 0.00 | 0.98 | 0.65 | 12 | Endothelial Cells |
| <i>LTC4S</i>   | 1.18 | 0.00 | 0.00 | 0.53 | 0.08 | 12 | Endothelial Cells |
| <i>TGFBR2</i>  | 1.17 | 0.00 | 0.00 | 0.71 | 0.19 | 12 | Endothelial Cells |
| <i>PDLIM1</i>  | 1.17 | 0.00 | 0.00 | 0.85 | 0.38 | 12 | Endothelial Cells |
| <i>SMS</i>     | 1.17 | 0.00 | 0.00 | 0.59 | 0.22 | 12 | Endothelial Cells |
| <i>IFITM3</i>  | 1.17 | 0.00 | 0.00 | 1.00 | 0.91 | 12 | Endothelial Cells |
| <i>MECOM</i>   | 1.16 | 0.00 | 0.00 | 0.53 | 0.05 | 12 | Endothelial Cells |
| <i>SSUH2</i>   | 1.15 | 0.00 | 0.00 | 0.38 | 0.00 | 12 | Endothelial Cells |
| <i>CLIC3</i>   | 1.14 | 0.00 | 0.00 | 0.47 | 0.05 | 12 | Endothelial Cells |
| <i>CFAP36</i>  | 1.14 | 0.00 | 0.00 | 0.61 | 0.19 | 12 | Endothelial Cells |
| <i>STOM</i>    | 1.13 | 0.00 | 0.00 | 0.92 | 0.44 | 12 | Endothelial Cells |
| <i>JAG1</i>    | 1.13 | 0.00 | 0.00 | 0.53 | 0.11 | 12 | Endothelial Cells |
| <i>FBLN5</i>   | 1.11 | 0.00 | 0.00 | 0.60 | 0.17 | 12 | Endothelial Cells |
| <i>CTNNAL1</i> | 1.1  | 0.00 | 0.00 | 0.58 | 0.19 | 12 | Endothelial Cells |
| <i>IFI6</i>    | 1.09 | 0.00 | 0.00 | 0.65 | 0.26 | 12 | Endothelial Cells |
| <i>MYCT1</i>   | 1.09 | 0.00 | 0.00 | 0.55 | 0.06 | 12 | Endothelial Cells |
| <i>CD93</i>    | 1.09 | 0.00 | 0.00 | 0.68 | 0.15 | 12 | Endothelial Cells |
| <i>CCDC88A</i> | 1.08 | 0.00 | 0.00 | 0.45 | 0.14 | 12 | Endothelial Cells |

|                   |      |      |      |      |      |    |                   |
|-------------------|------|------|------|------|------|----|-------------------|
| <i>ECSCR.1</i>    | 1.08 | 0.00 | 0.00 | 0.80 | 0.19 | 12 | Endothelial Cells |
| <i>LYPD2</i>      | 1.08 | 0.00 | 0.00 | 0.38 | 0.02 | 12 | Endothelial Cells |
| <i>ADCY4</i>      | 1.07 | 0.00 | 0.00 | 0.59 | 0.09 | 12 | Endothelial Cells |
| <i>ASRGL1</i>     | 1.07 | 0.00 | 0.00 | 0.53 | 0.05 | 12 | Endothelial Cells |
| <i>PCSK5</i>      | 1.07 | 0.00 | 0.00 | 0.46 | 0.05 | 12 | Endothelial Cells |
| <i>EPAS1</i>      | 1.06 | 0.00 | 0.00 | 0.92 | 0.43 | 12 | Endothelial Cells |
| <i>SEC11C</i>     | 1.06 | 0.00 | 0.00 | 0.58 | 0.12 | 12 | Endothelial Cells |
| <i>IFITM1</i>     | 1.05 | 0.00 | 0.00 | 0.53 | 0.17 | 12 | Endothelial Cells |
| <i>C4orf48</i>    | 1.04 | 0.00 | 0.00 | 0.58 | 0.14 | 12 | Endothelial Cells |
| <i>AC004947.2</i> | 1.04 | 0.00 | 0.00 | 0.37 | 0.00 | 12 | Endothelial Cells |
| <i>PCAT19</i>     | 1.04 | 0.00 | 0.00 | 0.74 | 0.18 | 12 | Endothelial Cells |
| <i>CDH5</i>       | 1.04 | 0.00 | 0.00 | 0.82 | 0.18 | 12 | Endothelial Cells |
| <i>FKBP1A</i>     | 1.03 | 0.00 | 0.00 | 0.93 | 0.72 | 12 | Endothelial Cells |
| <i>CD81</i>       | 1.03 | 0.00 | 0.00 | 0.72 | 0.39 | 12 | Endothelial Cells |
| <i>DUSP1</i>      | 1.03 | 0.00 | 0.00 | 0.74 | 0.41 | 12 | Endothelial Cells |
| <i>LEPROTL1</i>   | 1.03 | 0.00 | 0.00 | 0.74 | 0.24 | 12 | Endothelial Cells |
| <i>CTSH</i>       | 1.02 | 0.00 | 0.00 | 0.68 | 0.13 | 12 | Endothelial Cells |
| <i>IGFBP4</i>     | 1.02 | 0.00 | 0.00 | 0.94 | 0.50 | 12 | Endothelial Cells |
| <i>TSP0</i>       | 1.01 | 0.00 | 0.00 | 0.82 | 0.43 | 12 | Endothelial Cells |
| <i>JAG2</i>       | 1.01 | 0.00 | 0.00 | 0.44 | 0.03 | 12 | Endothelial Cells |
| <i>EMP1</i>       | 1    | 0.00 | 0.00 | 0.64 | 0.23 | 12 | Endothelial Cells |
| <i>APOA1</i>      | 1    | 0.00 | 0.00 | 0.39 | 0.02 | 12 | Endothelial Cells |
| <i>MALL</i>       | 0.99 | 0.00 | 0.00 | 0.45 | 0.05 | 12 | Endothelial Cells |
| <i>KLF4</i>       | 0.99 | 0.00 | 0.00 | 0.54 | 0.16 | 12 | Endothelial Cells |
| <i>SHE</i>        | 0.98 | 0.00 | 0.00 | 0.54 | 0.05 | 12 | Endothelial Cells |
| <i>ACVRL1</i>     | 0.98 | 0.00 | 0.00 | 0.64 | 0.16 | 12 | Endothelial Cells |
| <i>HEY1</i>       | 0.97 | 0.00 | 0.00 | 0.41 | 0.05 | 12 | Endothelial Cells |
| <i>ECE1</i>       | 0.96 | 0.00 | 0.00 | 0.60 | 0.15 | 12 | Endothelial Cells |
| <i>CAV1</i>       | 0.94 | 0.00 | 0.00 | 1.00 | 0.83 | 12 | Endothelial Cells |
| <i>FCN3</i>       | 0.93 | 0.00 | 0.00 | 0.41 | 0.06 | 12 | Endothelial Cells |
| <i>PTPRM</i>      | 0.93 | 0.00 | 0.00 | 0.46 | 0.08 | 12 | Endothelial Cells |
| <i>IL33</i>       | 0.92 | 0.00 | 0.00 | 0.53 | 0.12 | 12 | Endothelial Cells |
| <i>PIK3C2B</i>    | 0.92 | 0.00 | 0.00 | 0.45 | 0.04 | 12 | Endothelial Cells |
| <i>NUDT14</i>     | 0.92 | 0.00 | 0.00 | 0.54 | 0.09 | 12 | Endothelial Cells |
| <i>AMD1</i>       | 0.91 | 0.00 | 0.00 | 0.39 | 0.18 | 12 | Endothelial Cells |
| <i>PALMD</i>      | 0.9  | 0.00 | 0.00 | 0.51 | 0.08 | 12 | Endothelial Cells |
| <i>SNX3</i>       | 0.89 | 0.00 | 0.00 | 0.91 | 0.69 | 12 | Endothelial Cells |
| <i>COX17</i>      | 0.89 | 0.00 | 0.00 | 0.72 | 0.35 | 12 | Endothelial Cells |
| <i>ID3</i>        | 0.89 | 0.00 | 0.00 | 0.88 | 0.54 | 12 | Endothelial Cells |
| <i>PCMTD1</i>     | 0.88 | 0.00 | 0.00 | 0.57 | 0.22 | 12 | Endothelial Cells |
| <i>TAGLN2</i>     | 0.88 | 0.00 | 0.00 | 0.94 | 0.75 | 12 | Endothelial Cells |
| <i>BCAM</i>       | 0.88 | 0.00 | 0.00 | 0.84 | 0.33 | 12 | Endothelial Cells |
| <i>SSTR1</i>      | 0.87 | 0.00 | 0.00 | 0.40 | 0.01 | 12 | Endothelial Cells |

|                 |      |      |      |      |      |    |                   |
|-----------------|------|------|------|------|------|----|-------------------|
| <i>LTBP4</i>    | 0.87 | 0.00 | 0.00 | 0.68 | 0.29 | 12 | Endothelial Cells |
| <i>MAML1</i>    | 0.87 | 0.00 | 0.00 | 0.47 | 0.09 | 12 | Endothelial Cells |
| <i>ITPR1</i>    | 0.86 | 0.00 | 0.00 | 0.39 | 0.06 | 12 | Endothelial Cells |
| <i>MIR503HG</i> | 0.86 | 0.00 | 0.00 | 0.34 | 0.02 | 12 | Endothelial Cells |
| <i>UACA</i>     | 0.85 | 0.00 | 0.00 | 0.55 | 0.24 | 12 | Endothelial Cells |
| <i>AIF1L</i>    | 0.85 | 0.00 | 0.00 | 0.42 | 0.02 | 12 | Endothelial Cells |
| <i>PCDH17</i>   | 0.85 | 0.00 | 0.00 | 0.60 | 0.15 | 12 | Endothelial Cells |
| <i>RHOC</i>     | 0.85 | 0.00 | 0.00 | 0.87 | 0.61 | 12 | Endothelial Cells |
| <i>MRPL33</i>   | 0.85 | 0.00 | 0.00 | 0.69 | 0.44 | 12 | Endothelial Cells |
| <i>PARVB</i>    | 0.84 | 0.00 | 0.00 | 0.52 | 0.15 | 12 | Endothelial Cells |
| <i>SPTAN1</i>   | 0.84 | 0.00 | 0.00 | 0.57 | 0.22 | 12 | Endothelial Cells |
| <i>TMSB10</i>   | 0.84 | 0.00 | 0.00 | 1.00 | 0.99 | 12 | Endothelial Cells |
| <i>FXYS5</i>    | 0.84 | 0.00 | 0.00 | 0.74 | 0.26 | 12 | Endothelial Cells |
| <i>IGFBP2</i>   | 0.84 | 0.00 | 0.00 | 0.62 | 0.18 | 12 | Endothelial Cells |
| <i>GATA2</i>    | 0.84 | 0.00 | 0.00 | 0.48 | 0.07 | 12 | Endothelial Cells |
| <i>PLLP</i>     | 0.83 | 0.00 | 0.00 | 0.38 | 0.03 | 12 | Endothelial Cells |
| <i>TEK</i>      | 0.83 | 0.00 | 0.00 | 0.42 | 0.06 | 12 | Endothelial Cells |
| <i>CD109</i>    | 0.83 | 0.00 | 0.00 | 0.41 | 0.05 | 12 | Endothelial Cells |
| <i>SWAP70</i>   | 0.82 | 0.00 | 0.00 | 0.49 | 0.10 | 12 | Endothelial Cells |
| <i>PTPRG</i>    | 0.82 | 0.00 | 0.00 | 0.45 | 0.10 | 12 | Endothelial Cells |
| <i>CD320</i>    | 0.82 | 0.00 | 0.00 | 0.54 | 0.15 | 12 | Endothelial Cells |
| <i>PEMT</i>     | 0.81 | 0.00 | 0.00 | 0.41 | 0.11 | 12 | Endothelial Cells |
| <i>CYYR1</i>    | 0.81 | 0.00 | 0.00 | 0.51 | 0.12 | 12 | Endothelial Cells |
| <i>APLNR</i>    | 0.8  | 0.00 | 0.00 | 0.53 | 0.12 | 12 | Endothelial Cells |
| <i>FAM107A</i>  | 0.8  | 0.00 | 0.00 | 0.40 | 0.02 | 12 | Endothelial Cells |
| <i>CD59</i>     | 0.8  | 0.00 | 0.00 | 0.87 | 0.60 | 12 | Endothelial Cells |
| <i>NDRG1</i>    | 0.8  | 0.00 | 0.00 | 0.54 | 0.16 | 12 | Endothelial Cells |
| <i>S100A16</i>  | 0.8  | 0.00 | 0.00 | 0.79 | 0.34 | 12 | Endothelial Cells |
| <i>HSPA12B</i>  | 0.79 | 0.00 | 0.00 | 0.48 | 0.09 | 12 | Endothelial Cells |
| <i>CALR</i>     | 0.79 | 0.00 | 0.00 | 0.87 | 0.58 | 12 | Endothelial Cells |
| <i>NRN1</i>     | 0.79 | 0.00 | 0.00 | 0.51 | 0.08 | 12 | Endothelial Cells |
| <i>SYNPO</i>    | 0.79 | 0.00 | 0.00 | 0.45 | 0.12 | 12 | Endothelial Cells |
| <i>LAP3</i>     | 0.79 | 0.00 | 0.00 | 0.58 | 0.22 | 12 | Endothelial Cells |
| <i>APOL4</i>    | 0.79 | 0.00 | 0.00 | 0.34 | 0.02 | 12 | Endothelial Cells |
| <i>LIMS2</i>    | 0.78 | 0.00 | 0.00 | 0.44 | 0.08 | 12 | Endothelial Cells |
| <i>PRKCDBP</i>  | 0.78 | 0.00 | 0.00 | 0.79 | 0.40 | 12 | Endothelial Cells |
| <i>EGFL7</i>    | 0.78 | 0.00 | 0.00 | 0.81 | 0.26 | 12 | Endothelial Cells |
| <i>PPA1</i>     | 0.77 | 0.00 | 0.00 | 0.68 | 0.37 | 12 | Endothelial Cells |
| <i>FKBP9</i>    | 0.77 | 0.00 | 0.00 | 0.49 | 0.14 | 12 | Endothelial Cells |
| <i>CAPZA2</i>   | 0.77 | 0.00 | 0.00 | 0.74 | 0.51 | 12 | Endothelial Cells |
| <i>NOTCH4</i>   | 0.77 | 0.00 | 0.00 | 0.51 | 0.12 | 12 | Endothelial Cells |
| <i>HSPG2</i>    | 0.76 | 0.00 | 0.00 | 0.53 | 0.19 | 12 | Endothelial Cells |
| <i>RDX</i>      | 0.75 | 0.00 | 0.00 | 0.79 | 0.43 | 12 | Endothelial Cells |

|                      |      |      |      |      |      |    |                   |
|----------------------|------|------|------|------|------|----|-------------------|
| <i>SMAD6</i>         | 0.75 | 0.00 | 0.00 | 0.37 | 0.04 | 12 | Endothelial Cells |
| <i>ESAM</i>          | 0.75 | 0.00 | 0.00 | 0.82 | 0.35 | 12 | Endothelial Cells |
| <i>C1orf54</i>       | 0.75 | 0.00 | 0.00 | 0.52 | 0.18 | 12 | Endothelial Cells |
| <i>NAA10</i>         | 0.74 | 0.00 | 0.00 | 0.68 | 0.30 | 12 | Endothelial Cells |
| <i>FABP5</i>         | 0.73 | 0.00 | 0.00 | 0.53 | 0.27 | 12 | Endothelial Cells |
| <i>SLC14A1</i>       | 0.73 | 0.00 | 0.00 | 0.28 | 0.02 | 12 | Endothelial Cells |
| <i>SARAF</i>         | 0.73 | 0.00 | 0.00 | 0.86 | 0.64 | 12 | Endothelial Cells |
| <i>GIMAP1</i>        | 0.73 | 0.00 | 0.00 | 0.44 | 0.10 | 12 | Endothelial Cells |
| <i>HSPC324</i>       | 0.72 | 0.00 | 0.00 | 0.39 | 0.06 | 12 | Endothelial Cells |
| <i>SLFN5</i>         | 0.72 | 0.00 | 0.00 | 0.39 | 0.08 | 12 | Endothelial Cells |
| <i>AC079776.2</i>    | 0.72 | 0.00 | 0.00 | 0.29 | 0.00 | 12 | Endothelial Cells |
| <i>IL32</i>          | 0.72 | 0.00 | 0.00 | 0.80 | 0.28 | 12 | Endothelial Cells |
| <i>ANXA2</i>         | 0.72 | 0.00 | 0.00 | 0.92 | 0.65 | 12 | Endothelial Cells |
| <i>EMP3</i>          | 0.72 | 0.00 | 0.00 | 0.86 | 0.59 | 12 | Endothelial Cells |
| <i>ITGB4</i>         | 0.72 | 0.00 | 0.00 | 0.33 | 0.02 | 12 | Endothelial Cells |
| <i>SENP7</i>         | 0.71 | 0.00 | 0.00 | 0.26 | 0.06 | 12 | Endothelial Cells |
| <i>TUBB</i>          | 0.71 | 0.00 | 0.00 | 0.91 | 0.79 | 12 | Endothelial Cells |
| <i>LGALS9</i>        | 0.71 | 0.00 | 0.00 | 0.42 | 0.10 | 12 | Endothelial Cells |
| <i>KIAA1462</i>      | 0.71 | 0.00 | 0.00 | 0.49 | 0.13 | 12 | Endothelial Cells |
| <i>TUBA4A</i>        | 0.71 | 0.00 | 0.00 | 0.42 | 0.08 | 12 | Endothelial Cells |
| <i>RP11-467L13.5</i> | 0.71 | 0.00 | 0.00 | 0.55 | 0.19 | 12 | Endothelial Cells |
| <i>BMPR2</i>         | 0.7  | 0.00 | 0.00 | 0.58 | 0.22 | 12 | Endothelial Cells |
| <i>TMBIM1</i>        | 0.7  | 0.00 | 0.00 | 0.58 | 0.24 | 12 | Endothelial Cells |
| <i>FZD6</i>          | 0.7  | 0.00 | 0.00 | 0.35 | 0.02 | 12 | Endothelial Cells |
| <i>TIE1</i>          | 0.7  | 0.00 | 0.00 | 0.58 | 0.14 | 12 | Endothelial Cells |
| <i>MAGEH1</i>        | 0.69 | 0.00 | 0.00 | 0.55 | 0.27 | 12 | Endothelial Cells |
| <i>C1orf115</i>      | 0.69 | 0.00 | 0.00 | 0.34 | 0.05 | 12 | Endothelial Cells |
| <i>ITGA5</i>         | 0.69 | 0.00 | 0.00 | 0.45 | 0.13 | 12 | Endothelial Cells |
| <i>ANXA3</i>         | 0.68 | 0.00 | 0.00 | 0.46 | 0.12 | 12 | Endothelial Cells |
| <i>ETS1</i>          | 0.68 | 0.00 | 0.00 | 0.44 | 0.15 | 12 | Endothelial Cells |
| <i>NR4A1</i>         | 0.68 | 0.00 | 0.00 | 0.34 | 0.14 | 12 | Endothelial Cells |
| <i>TNFSF10</i>       | 0.68 | 0.00 | 0.00 | 0.69 | 0.22 | 12 | Endothelial Cells |
| <i>LIMA1</i>         | 0.68 | 0.00 | 0.00 | 0.55 | 0.21 | 12 | Endothelial Cells |
| <i>ELMO1</i>         | 0.68 | 0.00 | 0.00 | 0.41 | 0.09 | 12 | Endothelial Cells |
| <i>ISG15</i>         | 0.68 | 0.00 | 0.00 | 0.53 | 0.26 | 12 | Endothelial Cells |
| <i>PTRF</i>          | 0.68 | 0.00 | 0.00 | 0.92 | 0.69 | 12 | Endothelial Cells |
| <i>LRRFIP1</i>       | 0.67 | 0.00 | 0.00 | 0.53 | 0.27 | 12 | Endothelial Cells |
| <i>COBLL1</i>        | 0.67 | 0.00 | 0.00 | 0.42 | 0.07 | 12 | Endothelial Cells |
| <i>S100A11</i>       | 0.67 | 0.00 | 0.00 | 0.93 | 0.60 | 12 | Endothelial Cells |
| <i>NEDD9</i>         | 0.67 | 0.00 | 0.00 | 0.41 | 0.15 | 12 | Endothelial Cells |
| <i>ATP1A1</i>        | 0.66 | 0.00 | 0.00 | 0.54 | 0.22 | 12 | Endothelial Cells |
| <i>FLT1</i>          | 0.66 | 0.00 | 0.00 | 0.40 | 0.08 | 12 | Endothelial Cells |

|                |      |      |      |      |      |    |                   |
|----------------|------|------|------|------|------|----|-------------------|
| <i>EVL</i>     | 0.66 | 0.00 | 0.00 | 0.47 | 0.19 | 12 | Endothelial Cells |
| <i>ELK3</i>    | 0.66 | 0.00 | 0.00 | 0.49 | 0.15 | 12 | Endothelial Cells |
| <i>SSBP4</i>   | 0.66 | 0.00 | 0.00 | 0.52 | 0.18 | 12 | Endothelial Cells |
| <i>PIK3R3</i>  | 0.66 | 0.00 | 0.00 | 0.33 | 0.03 | 12 | Endothelial Cells |
| <i>KAZALD1</i> | 0.66 | 0.00 | 0.00 | 0.31 | 0.02 | 12 | Endothelial Cells |
| <i>SULT1B1</i> | 0.66 | 0.00 | 0.00 | 0.28 | 0.01 | 12 | Endothelial Cells |
| <i>NCKAP1</i>  | 0.65 | 0.00 | 0.00 | 0.48 | 0.17 | 12 | Endothelial Cells |
| <i>HOXA5</i>   | 0.65 | 0.00 | 0.00 | 0.58 | 0.23 | 12 | Endothelial Cells |
| <i>ADGRF5</i>  | 0.65 | 0.00 | 0.00 | 0.53 | 0.17 | 12 | Endothelial Cells |
| <i>LRP6</i>    | 0.65 | 0.00 | 0.00 | 0.40 | 0.11 | 12 | Endothelial Cells |
| <i>ITSN2</i>   | 0.65 | 0.00 | 0.00 | 0.47 | 0.16 | 12 | Endothelial Cells |
| <i>GIMAP4</i>  | 0.65 | 0.00 | 0.00 | 0.58 | 0.19 | 12 | Endothelial Cells |
| <i>GNAI2</i>   | 0.65 | 0.00 | 0.00 | 0.65 | 0.34 | 12 | Endothelial Cells |
| <i>MRPL17</i>  | 0.64 | 0.00 | 0.00 | 0.44 | 0.14 | 12 | Endothelial Cells |
| <i>SKAP2</i>   | 0.64 | 0.00 | 0.00 | 0.49 | 0.26 | 12 | Endothelial Cells |
| <i>FRYL</i>    | 0.64 | 0.00 | 0.00 | 0.38 | 0.11 | 12 | Endothelial Cells |
| <i>F2R</i>     | 0.64 | 0.00 | 0.00 | 0.42 | 0.10 | 12 | Endothelial Cells |
| <i>GADD45G</i> | 0.64 | 0.00 | 0.00 | 0.31 | 0.11 | 12 | Endothelial Cells |
| <i>LRRC32</i>  | 0.64 | 0.00 | 0.00 | 0.46 | 0.13 | 12 | Endothelial Cells |
| <i>VEGFC</i>   | 0.64 | 0.00 | 0.00 | 0.33 | 0.04 | 12 | Endothelial Cells |
| <i>POMP</i>    | 0.63 | 0.00 | 0.00 | 0.80 | 0.62 | 12 | Endothelial Cells |
| <i>PAPSS1</i>  | 0.63 | 0.00 | 0.00 | 0.42 | 0.13 | 12 | Endothelial Cells |
| <i>SYNGR2</i>  | 0.63 | 0.00 | 0.00 | 0.57 | 0.27 | 12 | Endothelial Cells |
| <i>F11R</i>    | 0.63 | 0.00 | 0.00 | 0.35 | 0.07 | 12 | Endothelial Cells |
| <i>CD58</i>    | 0.63 | 0.00 | 0.00 | 0.35 | 0.09 | 12 | Endothelial Cells |
| <i>HSPA5</i>   | 0.63 | 0.00 | 0.00 | 0.77 | 0.49 | 12 | Endothelial Cells |
| <i>PLPP1</i>   | 0.63 | 0.00 | 0.00 | 0.47 | 0.23 | 12 | Endothelial Cells |
| <i>RAPGEF5</i> | 0.63 | 0.00 | 0.00 | 0.47 | 0.13 | 12 | Endothelial Cells |
| <i>ACTN4</i>   | 0.63 | 0.00 | 0.00 | 0.65 | 0.40 | 12 | Endothelial Cells |
| <i>ARGLU1</i>  | 0.63 | 0.00 | 0.00 | 0.67 | 0.46 | 12 | Endothelial Cells |
| <i>MAP3K11</i> | 0.62 | 0.00 | 0.00 | 0.46 | 0.15 | 12 | Endothelial Cells |
| <i>CPNE8</i>   | 0.62 | 0.00 | 0.00 | 0.28 | 0.04 | 12 | Endothelial Cells |
| <i>RAPGEF1</i> | 0.62 | 0.00 | 0.00 | 0.32 | 0.06 | 12 | Endothelial Cells |
| <i>NAA38</i>   | 0.62 | 0.00 | 0.00 | 0.68 | 0.38 | 12 | Endothelial Cells |
| <i>ENTPD1</i>  | 0.62 | 0.00 | 0.00 | 0.47 | 0.13 | 12 | Endothelial Cells |
| <i>TSPAN2</i>  | 0.62 | 0.00 | 0.00 | 0.35 | 0.10 | 12 | Endothelial Cells |
| <i>RASIP1</i>  | 0.62 | 0.00 | 0.00 | 0.40 | 0.10 | 12 | Endothelial Cells |
| <i>LDB2</i>    | 0.62 | 0.00 | 0.00 | 0.54 | 0.18 | 12 | Endothelial Cells |
| <i>PTTG1IP</i> | 0.61 | 0.00 | 0.00 | 0.65 | 0.33 | 12 | Endothelial Cells |
| <i>PLSCR1</i>  | 0.61 | 0.00 | 0.00 | 0.46 | 0.17 | 12 | Endothelial Cells |
| <i>SOX7</i>    | 0.61 | 0.00 | 0.00 | 0.39 | 0.09 | 12 | Endothelial Cells |
| <i>SDCBP</i>   | 0.61 | 0.00 | 0.00 | 0.75 | 0.52 | 12 | Endothelial Cells |
| <i>WARS</i>    | 0.61 | 0.00 | 0.00 | 0.52 | 0.20 | 12 | Endothelial Cells |

|                  |      |      |      |      |      |    |                   |
|------------------|------|------|------|------|------|----|-------------------|
| <i>MGST2</i>     | 0.61 | 0.00 | 0.00 | 0.60 | 0.26 | 12 | Endothelial Cells |
| <i>SLC44A2</i>   | 0.6  | 0.00 | 0.00 | 0.46 | 0.17 | 12 | Endothelial Cells |
| <i>GIMAP7</i>    | 0.6  | 0.00 | 0.00 | 0.59 | 0.17 | 12 | Endothelial Cells |
| <i>CALM1</i>     | 0.6  | 0.00 | 0.00 | 0.85 | 0.74 | 12 | Endothelial Cells |
| <i>PREX2</i>     | 0.6  | 0.00 | 0.00 | 0.32 | 0.05 | 12 | Endothelial Cells |
| <i>THSD7A</i>    | 0.6  | 0.00 | 0.00 | 0.27 | 0.03 | 12 | Endothelial Cells |
| <i>C8orf33</i>   | 0.6  | 0.00 | 0.00 | 0.41 | 0.21 | 12 | Endothelial Cells |
| <i>ASS1</i>      | 0.6  | 0.00 | 0.00 | 0.32 | 0.05 | 12 | Endothelial Cells |
| <i>PDLIM5</i>    | 0.59 | 0.00 | 0.00 | 0.49 | 0.16 | 12 | Endothelial Cells |
| <i>FLI1</i>      | 0.59 | 0.00 | 0.00 | 0.40 | 0.12 | 12 | Endothelial Cells |
| <i>SSFA2</i>     | 0.59 | 0.00 | 0.00 | 0.38 | 0.09 | 12 | Endothelial Cells |
| <i>ARL15</i>     | 0.59 | 0.00 | 0.00 | 0.33 | 0.03 | 12 | Endothelial Cells |
| <i>BHLHE40</i>   | 0.59 | 0.00 | 0.00 | 0.39 | 0.08 | 12 | Endothelial Cells |
| <i>SIPA1L2</i>   | 0.59 | 0.00 | 0.00 | 0.35 | 0.11 | 12 | Endothelial Cells |
| <i>GPRC5B</i>    | 0.59 | 0.00 | 0.00 | 0.33 | 0.03 | 12 | Endothelial Cells |
| <i>PRCP</i>      | 0.59 | 0.00 | 0.00 | 0.58 | 0.24 | 12 | Endothelial Cells |
| <i>PROCR</i>     | 0.59 | 0.00 | 0.00 | 0.44 | 0.14 | 12 | Endothelial Cells |
| <i>ABLIM1</i>    | 0.59 | 0.00 | 0.00 | 0.35 | 0.07 | 12 | Endothelial Cells |
| <i>COL9A3</i>    | 0.58 | 0.00 | 0.00 | 0.29 | 0.02 | 12 | Endothelial Cells |
| <i>MEIS2</i>     | 0.58 | 0.00 | 0.00 | 0.40 | 0.12 | 12 | Endothelial Cells |
| <i>RPS6KA2</i>   | 0.58 | 0.00 | 0.00 | 0.40 | 0.11 | 12 | Endothelial Cells |
| <i>RAC1</i>      | 0.58 | 0.00 | 0.00 | 0.88 | 0.81 | 12 | Endothelial Cells |
| <i>SH3BP5</i>    | 0.58 | 0.00 | 0.00 | 0.55 | 0.21 | 12 | Endothelial Cells |
| <i>APOL3</i>     | 0.58 | 0.00 | 0.00 | 0.44 | 0.12 | 12 | Endothelial Cells |
| <i>PRICKLE1</i>  | 0.58 | 0.00 | 0.00 | 0.29 | 0.05 | 12 | Endothelial Cells |
| <i>UGCG</i>      | 0.58 | 0.00 | 0.00 | 0.34 | 0.13 | 12 | Endothelial Cells |
| <i>C10orf11</i>  | 0.57 | 0.00 | 0.00 | 0.35 | 0.07 | 12 | Endothelial Cells |
| <i>ARPC1B</i>    | 0.57 | 0.00 | 0.00 | 0.58 | 0.31 | 12 | Endothelial Cells |
| <i>DOCK9</i>     | 0.57 | 0.00 | 0.00 | 0.26 | 0.07 | 12 | Endothelial Cells |
| <i>GNAQ</i>      | 0.57 | 0.00 | 0.00 | 0.41 | 0.16 | 12 | Endothelial Cells |
| <i>SLC12A2</i>   | 0.57 | 0.00 | 0.00 | 0.31 | 0.12 | 12 | Endothelial Cells |
| <i>CTTNBP2NL</i> | 0.57 | 0.00 | 0.00 | 0.35 | 0.08 | 12 | Endothelial Cells |
| <i>SREK1IP1</i>  | 0.57 | 0.00 | 0.00 | 0.51 | 0.26 | 12 | Endothelial Cells |
| <i>ARHGEF3</i>   | 0.56 | 0.00 | 0.00 | 0.39 | 0.08 | 12 | Endothelial Cells |
| <i>PKN3</i>      | 0.56 | 0.00 | 0.00 | 0.27 | 0.02 | 12 | Endothelial Cells |
| <i>LSR</i>       | 0.56 | 0.00 | 0.00 | 0.34 | 0.10 | 12 | Endothelial Cells |
| <i>RALB</i>      | 0.56 | 0.00 | 0.00 | 0.48 | 0.19 | 12 | Endothelial Cells |
| <i>SPTBN1</i>    | 0.56 | 0.00 | 0.00 | 0.78 | 0.42 | 12 | Endothelial Cells |
| <i>ADAR</i>      | 0.56 | 0.00 | 0.00 | 0.52 | 0.23 | 12 | Endothelial Cells |
| <i>CLIC4</i>     | 0.56 | 0.00 | 0.00 | 0.59 | 0.33 | 12 | Endothelial Cells |
| <i>PREX1</i>     | 0.55 | 0.00 | 0.00 | 0.32 | 0.08 | 12 | Endothelial Cells |
| <i>PLCG2</i>     | 0.55 | 0.00 | 0.00 | 0.26 | 0.03 | 12 | Endothelial Cells |
| <i>MYL12B</i>    | 0.55 | 0.00 | 0.00 | 0.86 | 0.77 | 12 | Endothelial Cells |

|                   |      |      |      |      |      |    |                   |
|-------------------|------|------|------|------|------|----|-------------------|
| <i>C1QTNF6</i>    | 0.55 | 0.00 | 0.00 | 0.28 | 0.05 | 12 | Endothelial Cells |
| <i>KNOP1</i>      | 0.55 | 0.00 | 0.00 | 0.40 | 0.17 | 12 | Endothelial Cells |
| <i>KIAA1671</i>   | 0.55 | 0.00 | 0.00 | 0.27 | 0.03 | 12 | Endothelial Cells |
| <i>JUNB</i>       | 0.55 | 0.00 | 0.01 | 0.71 | 0.52 | 12 | Endothelial Cells |
| <i>THSD1</i>      | 0.55 | 0.00 | 0.00 | 0.39 | 0.09 | 12 | Endothelial Cells |
| <i>C19orf33</i>   | 0.55 | 0.00 | 0.00 | 0.28 | 0.03 | 12 | Endothelial Cells |
| <i>AC132217.4</i> | 0.54 | 0.00 | 0.00 | 0.26 | 0.01 | 12 | Endothelial Cells |
| <i>OSBPL8</i>     | 0.54 | 0.00 | 0.01 | 0.39 | 0.18 | 12 | Endothelial Cells |
| <i>TTC28</i>      | 0.54 | 0.00 | 0.00 | 0.35 | 0.13 | 12 | Endothelial Cells |
| <i>FURIN</i>      | 0.54 | 0.00 | 0.00 | 0.29 | 0.07 | 12 | Endothelial Cells |
| <i>CTNNA1</i>     | 0.54 | 0.00 | 0.00 | 0.57 | 0.34 | 12 | Endothelial Cells |
| <i>TACC1</i>      | 0.53 | 0.00 | 0.00 | 0.71 | 0.46 | 12 | Endothelial Cells |
| <i>IER2</i>       | 0.53 | 0.00 | 0.05 | 0.62 | 0.46 | 12 | Endothelial Cells |
| <i>COL18A1</i>    | 0.53 | 0.00 | 0.00 | 0.40 | 0.18 | 12 | Endothelial Cells |
| <i>MYO1C</i>      | 0.53 | 0.00 | 0.00 | 0.48 | 0.23 | 12 | Endothelial Cells |
| <i>CFLAR</i>      | 0.53 | 0.00 | 0.00 | 0.54 | 0.26 | 12 | Endothelial Cells |
| <i>CRIM1</i>      | 0.53 | 0.00 | 0.01 | 0.31 | 0.13 | 12 | Endothelial Cells |
| <i>TUBB4B</i>     | 0.53 | 0.00 | 0.00 | 0.62 | 0.40 | 12 | Endothelial Cells |
| <i>WWTR1</i>      | 0.53 | 0.00 | 0.01 | 0.41 | 0.21 | 12 | Endothelial Cells |
| <i>DHH</i>        | 0.53 | 0.00 | 0.00 | 0.28 | 0.01 | 12 | Endothelial Cells |
| <i>FGL2</i>       | 0.53 | 0.00 | 0.00 | 0.26 | 0.06 | 12 | Endothelial Cells |
| <i>TCN2</i>       | 0.53 | 0.00 | 0.00 | 0.27 | 0.06 | 12 | Endothelial Cells |
| <i>SORBS2</i>     | 0.52 | 0.00 | 0.00 | 0.27 | 0.07 | 12 | Endothelial Cells |
| <i>TNFAIP1</i>    | 0.52 | 0.00 | 0.00 | 0.29 | 0.10 | 12 | Endothelial Cells |
| <i>TMEM30A</i>    | 0.52 | 0.00 | 0.00 | 0.46 | 0.21 | 12 | Endothelial Cells |
| <i>TES</i>        | 0.52 | 0.00 | 0.00 | 0.28 | 0.09 | 12 | Endothelial Cells |
| <i>KLF3</i>       | 0.52 | 0.00 | 0.00 | 0.38 | 0.13 | 12 | Endothelial Cells |
| <i>ERC1</i>       | 0.52 | 0.00 | 0.00 | 0.31 | 0.09 | 12 | Endothelial Cells |
| <i>TBC1D1</i>     | 0.52 | 0.00 | 0.00 | 0.31 | 0.11 | 12 | Endothelial Cells |
| <i>ARHGEF15</i>   | 0.51 | 0.00 | 0.00 | 0.38 | 0.07 | 12 | Endothelial Cells |
| <i>FDPS</i>       | 0.51 | 0.00 | 0.00 | 0.60 | 0.34 | 12 | Endothelial Cells |
| <i>KANK3</i>      | 0.51 | 0.00 | 0.00 | 0.38 | 0.14 | 12 | Endothelial Cells |
| <i>CYB5R3</i>     | 0.51 | 0.00 | 0.03 | 0.64 | 0.45 | 12 | Endothelial Cells |
| <i>ORAI1</i>      | 0.5  | 0.00 | 0.00 | 0.32 | 0.07 | 12 | Endothelial Cells |
| <i>LEPR</i>       | 0.5  | 0.00 | 0.00 | 0.31 | 0.08 | 12 | Endothelial Cells |
| <i>SERINC3</i>    | 0.5  | 0.00 | 0.00 | 0.47 | 0.24 | 12 | Endothelial Cells |
| <i>LYL1</i>       | 0.5  | 0.00 | 0.00 | 0.33 | 0.11 | 12 | Endothelial Cells |
| <i>FEZ2</i>       | 0.5  | 0.00 | 0.00 | 0.47 | 0.24 | 12 | Endothelial Cells |
| <i>FLNB</i>       | 0.5  | 0.00 | 0.00 | 0.31 | 0.06 | 12 | Endothelial Cells |
| <i>FUT8</i>       | 0.5  | 0.00 | 0.00 | 0.28 | 0.05 | 12 | Endothelial Cells |
| <i>NDUFC2</i>     | 0.5  | 0.00 | 0.00 | 0.77 | 0.64 | 12 | Endothelial Cells |
| <i>ELF1</i>       | 0.5  | 0.00 | 0.00 | 0.44 | 0.16 | 12 | Endothelial Cells |
| <i>CASKIN2</i>    | 0.49 | 0.00 | 0.00 | 0.35 | 0.09 | 12 | Endothelial Cells |

|                     |      |      |      |      |      |    |                   |
|---------------------|------|------|------|------|------|----|-------------------|
| <i>RHOA</i>         | 0.49 | 0.00 | 0.00 | 0.81 | 0.70 | 12 | Endothelial Cells |
| <i>EPHB4</i>        | 0.49 | 0.00 | 0.00 | 0.32 | 0.08 | 12 | Endothelial Cells |
| <i>DLL4</i>         | 0.49 | 0.00 | 0.00 | 0.28 | 0.06 | 12 | Endothelial Cells |
| <i>MLLT4</i>        | 0.49 | 0.00 | 0.00 | 0.41 | 0.17 | 12 | Endothelial Cells |
| <i>G3BP1</i>        | 0.49 | 0.00 | 0.00 | 0.48 | 0.23 | 12 | Endothelial Cells |
| <i>ITGB1</i>        | 0.49 | 0.00 | 0.00 | 0.84 | 0.63 | 12 | Endothelial Cells |
| <i>BIRC6</i>        | 0.49 | 0.00 | 0.00 | 0.35 | 0.14 | 12 | Endothelial Cells |
| <i>TFPI</i>         | 0.49 | 0.00 | 0.03 | 0.67 | 0.43 | 12 | Endothelial Cells |
| <i>SOX13</i>        | 0.49 | 0.00 | 0.00 | 0.28 | 0.05 | 12 | Endothelial Cells |
| <i>EFNA1</i>        | 0.48 | 0.00 | 0.00 | 0.40 | 0.14 | 12 | Endothelial Cells |
| <i>NOTCH1</i>       | 0.48 | 0.00 | 0.00 | 0.35 | 0.08 | 12 | Endothelial Cells |
| <i>SLC2A1</i>       | 0.48 | 0.00 | 0.00 | 0.26 | 0.04 | 12 | Endothelial Cells |
| <i>MAST4</i>        | 0.48 | 0.00 | 0.00 | 0.39 | 0.16 | 12 | Endothelial Cells |
| <i>NPR1</i>         | 0.48 | 0.00 | 0.00 | 0.28 | 0.04 | 12 | Endothelial Cells |
| <i>AP1S2</i>        | 0.47 | 0.00 | 0.01 | 0.46 | 0.24 | 12 | Endothelial Cells |
| <i>SCRN2</i>        | 0.47 | 0.00 | 0.00 | 0.31 | 0.12 | 12 | Endothelial Cells |
| <i>TPM3</i>         | 0.47 | 0.00 | 0.00 | 0.57 | 0.31 | 12 | Endothelial Cells |
| <i>GUK1</i>         | 0.47 | 0.00 | 0.03 | 0.77 | 0.67 | 12 | Endothelial Cells |
| <i>HSP90B1</i>      | 0.47 | 0.00 | 0.00 | 0.79 | 0.60 | 12 | Endothelial Cells |
| <i>AHR</i>          | 0.47 | 0.00 | 0.00 | 0.33 | 0.12 | 12 | Endothelial Cells |
| <i>RPN2</i>         | 0.47 | 0.00 | 0.00 | 0.64 | 0.38 | 12 | Endothelial Cells |
| <i>RP11-693N9.2</i> | 0.47 | 0.00 | 0.00 | 0.39 | 0.16 | 12 | Endothelial Cells |
| <i>ELN</i>          | 0.47 | 0.00 | 0.00 | 0.86 | 0.54 | 12 | Endothelial Cells |
| <i>CDC37</i>        | 0.47 | 0.00 | 0.01 | 0.68 | 0.49 | 12 | Endothelial Cells |
| <i>CMTM8</i>        | 0.46 | 0.00 | 0.00 | 0.27 | 0.06 | 12 | Endothelial Cells |
| <i>MMP15</i>        | 0.46 | 0.00 | 0.00 | 0.29 | 0.05 | 12 | Endothelial Cells |
| <i>AGRN</i>         | 0.46 | 0.00 | 0.00 | 0.27 | 0.07 | 12 | Endothelial Cells |
| <i>TNKS1BP1</i>     | 0.46 | 0.00 | 0.00 | 0.27 | 0.08 | 12 | Endothelial Cells |
| <i>RICTOR</i>       | 0.46 | 0.00 | 0.00 | 0.39 | 0.15 | 12 | Endothelial Cells |
| <i>S1PR1</i>        | 0.46 | 0.00 | 0.00 | 0.39 | 0.14 | 12 | Endothelial Cells |
| <i>UTRN</i>         | 0.46 | 0.00 | 0.00 | 0.42 | 0.18 | 12 | Endothelial Cells |
| <i>AZIN1</i>        | 0.46 | 0.00 | 0.00 | 0.35 | 0.13 | 12 | Endothelial Cells |
| <i>MAPK3</i>        | 0.45 | 0.00 | 0.00 | 0.39 | 0.17 | 12 | Endothelial Cells |
| <i>S100A6</i>       | 0.45 | 0.00 | 0.00 | 0.98 | 0.84 | 12 | Endothelial Cells |
| <i>FAM69B</i>       | 0.45 | 0.00 | 0.00 | 0.26 | 0.05 | 12 | Endothelial Cells |
| <i>FES</i>          | 0.45 | 0.00 | 0.00 | 0.28 | 0.07 | 12 | Endothelial Cells |
| <i>HHEX</i>         | 0.45 | 0.00 | 0.00 | 0.32 | 0.10 | 12 | Endothelial Cells |
| <i>KRAS</i>         | 0.45 | 0.00 | 0.00 | 0.37 | 0.15 | 12 | Endothelial Cells |
| <i>CCDC85B</i>      | 0.45 | 0.00 | 0.02 | 0.62 | 0.41 | 12 | Endothelial Cells |
| <i>TUSC3</i>        | 0.45 | 0.00 | 0.01 | 0.41 | 0.21 | 12 | Endothelial Cells |
| <i>WNK1</i>         | 0.45 | 0.00 | 0.03 | 0.32 | 0.14 | 12 | Endothelial Cells |
| <i>FKBP1C</i>       | 0.45 | 0.00 | 0.00 | 0.28 | 0.10 | 12 | Endothelial Cells |

|                    |      |      |      |      |      |    |                   |
|--------------------|------|------|------|------|------|----|-------------------|
| <i>MMP2</i>        | 0.44 | 0.00 | 0.00 | 0.65 | 0.34 | 12 | Endothelial Cells |
| <i>DYNLL1</i>      | 0.44 | 0.00 | 0.00 | 0.85 | 0.79 | 12 | Endothelial Cells |
| <i>SNAP23</i>      | 0.44 | 0.00 | 0.01 | 0.40 | 0.19 | 12 | Endothelial Cells |
| <i>LUZP1</i>       | 0.44 | 0.00 | 0.00 | 0.40 | 0.18 | 12 | Endothelial Cells |
| <i>GFOD1</i>       | 0.44 | 0.00 | 0.00 | 0.26 | 0.06 | 12 | Endothelial Cells |
| <i>RAB11A</i>      | 0.44 | 0.00 | 0.00 | 0.69 | 0.44 | 12 | Endothelial Cells |
| <i>THBD</i>        | 0.44 | 0.00 | 0.00 | 0.45 | 0.15 | 12 | Endothelial Cells |
| <i>ABHD17A</i>     | 0.44 | 0.00 | 0.00 | 0.40 | 0.16 | 12 | Endothelial Cells |
| <i>MGAT1</i>       | 0.44 | 0.00 | 0.02 | 0.46 | 0.25 | 12 | Endothelial Cells |
| <i>PPP2R2A</i>     | 0.44 | 0.00 | 0.00 | 0.40 | 0.19 | 12 | Endothelial Cells |
| <i>TMEM88</i>      | 0.44 | 0.00 | 0.00 | 0.33 | 0.08 | 12 | Endothelial Cells |
| <i>CCDC88C</i>     | 0.44 | 0.00 | 0.00 | 0.35 | 0.10 | 12 | Endothelial Cells |
| <i>ARHGAP27</i>    | 0.43 | 0.00 | 0.00 | 0.27 | 0.05 | 12 | Endothelial Cells |
| <i>PRKD2</i>       | 0.43 | 0.00 | 0.00 | 0.28 | 0.08 | 12 | Endothelial Cells |
| <i>VAMP5</i>       | 0.43 | 0.00 | 0.00 | 0.78 | 0.52 | 12 | Endothelial Cells |
| <i>CXCR4</i>       | 0.43 | 0.00 | 0.00 | 0.35 | 0.10 | 12 | Endothelial Cells |
| <i>ITGA6</i>       | 0.43 | 0.00 | 0.00 | 0.28 | 0.07 | 12 | Endothelial Cells |
| <i>TUBA1B</i>      | 0.43 | 0.00 | 0.00 | 0.89 | 0.78 | 12 | Endothelial Cells |
| <i>KRTCAP2</i>     | 0.43 | 0.00 | 0.04 | 0.72 | 0.54 | 12 | Endothelial Cells |
| <i>MLLT1</i>       | 0.43 | 0.00 | 0.00 | 0.28 | 0.08 | 12 | Endothelial Cells |
| <i>ZFAND2B</i>     | 0.43 | 0.00 | 0.00 | 0.32 | 0.12 | 12 | Endothelial Cells |
| <i>PLS3</i>        | 0.43 | 0.00 | 0.00 | 0.67 | 0.43 | 12 | Endothelial Cells |
| <i>RAB3GAP1</i>    | 0.43 | 0.00 | 0.00 | 0.26 | 0.10 | 12 | Endothelial Cells |
| <i>TSPAN14</i>     | 0.42 | 0.00 | 0.00 | 0.37 | 0.14 | 12 | Endothelial Cells |
| <i>QKI</i>         | 0.42 | 0.00 | 0.00 | 0.45 | 0.20 | 12 | Endothelial Cells |
| <i>C10orf54</i>    | 0.42 | 0.00 | 0.00 | 0.45 | 0.20 | 12 | Endothelial Cells |
| <i>SERTAD4-AS1</i> | 0.42 | 0.00 | 0.00 | 0.27 | 0.05 | 12 | Endothelial Cells |
| <i>PEA15</i>       | 0.42 | 0.00 | 0.02 | 0.49 | 0.27 | 12 | Endothelial Cells |
| <i>TRIB2</i>       | 0.42 | 0.00 | 0.00 | 0.29 | 0.10 | 12 | Endothelial Cells |
| <i>PHACTR2</i>     | 0.42 | 0.00 | 0.00 | 0.51 | 0.26 | 12 | Endothelial Cells |
| <i>DTD1</i>        | 0.41 | 0.00 | 0.00 | 0.29 | 0.11 | 12 | Endothelial Cells |
| <i>ARHGAP17</i>    | 0.41 | 0.00 | 0.00 | 0.27 | 0.07 | 12 | Endothelial Cells |
| <i>FRMD4B</i>      | 0.41 | 0.00 | 0.00 | 0.41 | 0.15 | 12 | Endothelial Cells |
| <i>MRPS28</i>      | 0.41 | 0.00 | 0.01 | 0.32 | 0.13 | 12 | Endothelial Cells |
| <i>IGF2BP2</i>     | 0.4  | 0.00 | 0.00 | 0.38 | 0.15 | 12 | Endothelial Cells |
| <i>APOL1</i>       | 0.4  | 0.00 | 0.00 | 0.26 | 0.09 | 12 | Endothelial Cells |
| <i>TCEAL9</i>      | 0.4  | 0.00 | 0.03 | 0.75 | 0.54 | 12 | Endothelial Cells |
| <i>IL11RA</i>      | 0.4  | 0.00 | 0.00 | 0.28 | 0.11 | 12 | Endothelial Cells |
| <i>CEP68</i>       | 0.4  | 0.00 | 0.00 | 0.29 | 0.11 | 12 | Endothelial Cells |
| <i>FAM129B</i>     | 0.4  | 0.00 | 0.00 | 0.32 | 0.11 | 12 | Endothelial Cells |
| <i>USHBP1</i>      | 0.4  | 0.00 | 0.00 | 0.26 | 0.04 | 12 | Endothelial Cells |
| <i>FYN</i>         | 0.39 | 0.00 | 0.01 | 0.32 | 0.13 | 12 | Endothelial Cells |

|                  |      |      |      |      |      |    |                   |
|------------------|------|------|------|------|------|----|-------------------|
| <i>CITED4</i>    | 0.39 | 0.00 | 0.00 | 0.26 | 0.05 | 12 | Endothelial Cells |
| <i>KDR</i>       | 0.39 | 0.00 | 0.00 | 0.28 | 0.09 | 12 | Endothelial Cells |
| <i>SH3BGRL3</i>  | 0.39 | 0.00 | 0.00 | 0.87 | 0.58 | 12 | Endothelial Cells |
| <i>CCNY</i>      | 0.39 | 0.00 | 0.00 | 0.26 | 0.08 | 12 | Endothelial Cells |
| <i>PAK4</i>      | 0.39 | 0.00 | 0.00 | 0.28 | 0.10 | 12 | Endothelial Cells |
| <i>TUBG1</i>     | 0.39 | 0.00 | 0.00 | 0.26 | 0.09 | 12 | Endothelial Cells |
| <i>FGD5</i>      | 0.39 | 0.00 | 0.00 | 0.26 | 0.06 | 12 | Endothelial Cells |
| <i>KIF5B</i>     | 0.39 | 0.00 | 0.01 | 0.71 | 0.47 | 12 | Endothelial Cells |
| <i>ELOVL5</i>    | 0.39 | 0.00 | 0.04 | 0.31 | 0.13 | 12 | Endothelial Cells |
| <i>ARRB1</i>     | 0.38 | 0.00 | 0.00 | 0.27 | 0.08 | 12 | Endothelial Cells |
| <i>GAS2L1</i>    | 0.38 | 0.00 | 0.00 | 0.26 | 0.07 | 12 | Endothelial Cells |
| <i>CNKSRL3</i>   | 0.38 | 0.00 | 0.00 | 0.26 | 0.07 | 12 | Endothelial Cells |
| <i>SH2D3C</i>    | 0.38 | 0.00 | 0.00 | 0.35 | 0.12 | 12 | Endothelial Cells |
| <i>HLA-B</i>     | 0.38 | 0.00 | 0.00 | 0.95 | 0.54 | 12 | Endothelial Cells |
| <i>RAI2</i>      | 0.37 | 0.00 | 0.00 | 0.27 | 0.06 | 12 | Endothelial Cells |
| <i>HPCAL1</i>    | 0.37 | 0.00 | 0.00 | 0.38 | 0.16 | 12 | Endothelial Cells |
| <i>MIER2</i>     | 0.37 | 0.00 | 0.00 | 0.27 | 0.08 | 12 | Endothelial Cells |
| <i>TMEM181</i>   | 0.37 | 0.00 | 0.00 | 0.26 | 0.05 | 12 | Endothelial Cells |
| <i>RAI14</i>     | 0.36 | 0.00 | 0.00 | 0.28 | 0.10 | 12 | Endothelial Cells |
| <i>VAMP3</i>     | 0.36 | 0.00 | 0.01 | 0.51 | 0.26 | 12 | Endothelial Cells |
| <i>MFNG</i>      | 0.36 | 0.00 | 0.00 | 0.27 | 0.07 | 12 | Endothelial Cells |
| <i>GABARAPL2</i> | 0.35 | 0.00 | 0.03 | 0.81 | 0.66 | 12 | Endothelial Cells |
| <i>IFNAR2</i>    | 0.35 | 0.00 | 0.00 | 0.27 | 0.10 | 12 | Endothelial Cells |
| <i>FRY</i>       | 0.35 | 0.00 | 0.00 | 0.37 | 0.15 | 12 | Endothelial Cells |
| <i>DOCK6</i>     | 0.35 | 0.00 | 0.00 | 0.39 | 0.15 | 12 | Endothelial Cells |
| <i>SERF2</i>     | 0.35 | 0.00 | 0.01 | 0.98 | 0.95 | 12 | Endothelial Cells |
| <i>TSPAN13</i>   | 0.35 | 0.00 | 0.00 | 0.34 | 0.13 | 12 | Endothelial Cells |
| <i>A4GALT</i>    | 0.35 | 0.00 | 0.00 | 0.26 | 0.08 | 12 | Endothelial Cells |
| <i>ELK4</i>      | 0.34 | 0.00 | 0.00 | 0.33 | 0.13 | 12 | Endothelial Cells |
| <i>PRKCH</i>     | 0.34 | 0.00 | 0.00 | 0.31 | 0.09 | 12 | Endothelial Cells |
| <i>ERG</i>       | 0.34 | 0.00 | 0.00 | 0.37 | 0.12 | 12 | Endothelial Cells |
| <i>RGS5</i>      | 0.34 | 0.00 | 0.02 | 0.48 | 0.24 | 12 | Endothelial Cells |
| <i>SLCO2A1</i>   | 0.34 | 0.00 | 0.00 | 0.32 | 0.11 | 12 | Endothelial Cells |
| <i>PPIA</i>      | 0.34 | 0.00 | 0.02 | 0.93 | 0.85 | 12 | Endothelial Cells |
| <i>GNG11</i>     | 0.34 | 0.00 | 0.00 | 0.85 | 0.44 | 12 | Endothelial Cells |
| <i>SVIP</i>      | 0.33 | 0.00 | 0.04 | 0.35 | 0.16 | 12 | Endothelial Cells |
| <i>INPP5K</i>    | 0.33 | 0.00 | 0.00 | 0.31 | 0.10 | 12 | Endothelial Cells |
| <i>SHKBP1</i>    | 0.33 | 0.00 | 0.02 | 0.28 | 0.11 | 12 | Endothelial Cells |
| <i>A2M</i>       | 0.32 | 0.00 | 0.00 | 0.93 | 0.61 | 12 | Endothelial Cells |
| <i>TPST2</i>     | 0.32 | 0.00 | 0.00 | 0.38 | 0.15 | 12 | Endothelial Cells |
| <i>HLA-E</i>     | 0.32 | 0.00 | 0.00 | 0.88 | 0.60 | 12 | Endothelial Cells |
| <i>EPS8</i>      | 0.31 | 0.00 | 0.02 | 0.27 | 0.10 | 12 | Endothelial Cells |
| <i>MANSC1</i>    | 0.31 | 0.00 | 0.00 | 0.26 | 0.05 | 12 | Endothelial Cells |

|                 |      |      |      |      |      |    |                   |
|-----------------|------|------|------|------|------|----|-------------------|
| <i>SPTLC2</i>   | 0.3  | 0.00 | 0.00 | 0.26 | 0.09 | 12 | Endothelial Cells |
| <i>CYFIP1</i>   | 0.3  | 0.00 | 0.03 | 0.35 | 0.16 | 12 | Endothelial Cells |
| <i>RAMP3</i>    | 0.3  | 0.00 | 0.00 | 0.40 | 0.16 | 12 | Endothelial Cells |
| <i>PICALM</i>   | 0.3  | 0.00 | 0.04 | 0.38 | 0.17 | 12 | Endothelial Cells |
| <i>CDC42EP3</i> | 0.29 | 0.00 | 0.00 | 0.26 | 0.09 | 12 | Endothelial Cells |
| <i>CFL1</i>     | 0.29 | 0.00 | 0.03 | 0.97 | 0.91 | 12 | Endothelial Cells |
| <i>AGPAT1</i>   | 0.28 | 0.00 | 0.05 | 0.28 | 0.11 | 12 | Endothelial Cells |
| <i>NMI</i>      | 0.27 | 0.00 | 0.01 | 0.31 | 0.12 | 12 | Endothelial Cells |
| <i>C8orf4</i>   | 0.27 | 0.00 | 0.02 | 0.68 | 0.43 | 12 | Endothelial Cells |
| <i>PTMA</i>     | 0.27 | 0.00 | 0.00 | 1.00 | 1.00 | 12 | Endothelial Cells |
| <i>IGHM</i>     | 4.27 | 0.00 | 0.00 | 0.99 | 0.02 | 13 | B Cells           |
| <i>IGKC</i>     | 4.12 | 0.00 | 0.00 | 0.61 | 0.02 | 13 | B Cells           |
| <i>IGLC2</i>    | 3.57 | 0.00 | 0.00 | 0.77 | 0.00 | 13 | B Cells           |
| <i>IGLC3</i>    | 3.24 | 0.00 | 0.00 | 0.63 | 0.00 | 13 | B Cells           |
| <i>CD79B</i>    | 2.92 | 0.00 | 0.00 | 0.94 | 0.02 | 13 | B Cells           |
| <i>CD37</i>     | 2.77 | 0.00 | 0.00 | 0.98 | 0.07 | 13 | B Cells           |
| <i>LTB</i>      | 2.7  | 0.00 | 0.00 | 0.92 | 0.04 | 13 | B Cells           |
| <i>MS4A1</i>    | 2.68 | 0.00 | 0.00 | 0.90 | 0.00 | 13 | B Cells           |
| <i>TCL1A</i>    | 2.6  | 0.00 | 0.00 | 0.75 | 0.00 | 13 | B Cells           |
| <i>CD79A</i>    | 2.46 | 0.00 | 0.00 | 0.94 | 0.01 | 13 | B Cells           |
| <i>CD52</i>     | 2.42 | 0.00 | 0.00 | 0.99 | 0.09 | 13 | B Cells           |
| <i>CD74</i>     | 2.31 | 0.00 | 0.00 | 1.00 | 0.44 | 13 | B Cells           |
| <i>IGHD</i>     | 2.14 | 0.00 | 0.00 | 0.75 | 0.00 | 13 | B Cells           |
| <i>VPREB3</i>   | 1.88 | 0.00 | 0.00 | 0.63 | 0.00 | 13 | B Cells           |
| <i>CXCR4</i>    | 1.84 | 0.00 | 0.00 | 0.72 | 0.10 | 13 | B Cells           |
| <i>IGLL5</i>    | 1.78 | 0.00 | 0.00 | 0.38 | 0.00 | 13 | B Cells           |
| <i>HLA-DRA</i>  | 1.64 | 0.00 | 0.00 | 0.98 | 0.26 | 13 | B Cells           |
| <i>SPIB</i>     | 1.56 | 0.00 | 0.00 | 0.54 | 0.01 | 13 | B Cells           |
| <i>FAM129C</i>  | 1.56 | 0.00 | 0.00 | 0.61 | 0.01 | 13 | B Cells           |
| <i>CORO1A</i>   | 1.55 | 0.00 | 0.00 | 0.84 | 0.11 | 13 | B Cells           |
| <i>MZB1</i>     | 1.53 | 0.00 | 0.00 | 0.57 | 0.00 | 13 | B Cells           |
| <i>HLA-DPB1</i> | 1.5  | 0.00 | 0.00 | 0.94 | 0.18 | 13 | B Cells           |
| <i>LIMD2</i>    | 1.5  | 0.00 | 0.00 | 0.79 | 0.14 | 13 | B Cells           |
| <i>HLA-DRB1</i> | 1.48 | 0.00 | 0.00 | 0.91 | 0.11 | 13 | B Cells           |
| <i>PLAC8</i>    | 1.46 | 0.00 | 0.00 | 0.67 | 0.07 | 13 | B Cells           |
| <i>JCHAIN</i>   | 1.44 | 0.00 | 0.00 | 0.48 | 0.02 | 13 | B Cells           |
| <i>HLA-DMB</i>  | 1.43 | 0.00 | 0.00 | 0.70 | 0.06 | 13 | B Cells           |
| <i>LAPTM5</i>   | 1.43 | 0.00 | 0.00 | 0.76 | 0.15 | 13 | B Cells           |
| <i>FCRLA</i>    | 1.42 | 0.00 | 0.00 | 0.56 | 0.00 | 13 | B Cells           |
| <i>HLA-DPA1</i> | 1.36 | 0.00 | 0.00 | 0.89 | 0.15 | 13 | B Cells           |
| <i>UCP2</i>     | 1.34 | 0.00 | 0.00 | 0.72 | 0.11 | 13 | B Cells           |
| <i>NCF1C</i>    | 1.33 | 0.00 | 0.00 | 0.54 | 0.01 | 13 | B Cells           |
| <i>CD24</i>     | 1.31 | 0.00 | 0.00 | 0.39 | 0.02 | 13 | B Cells           |

|                     |      |      |      |      |      |    |         |
|---------------------|------|------|------|------|------|----|---------|
| <i>PLD4</i>         | 1.28 | 0.00 | 0.00 | 0.51 | 0.01 | 13 | B Cells |
| <i>BIRC3</i>        | 1.27 | 0.00 | 0.00 | 0.49 | 0.03 | 13 | B Cells |
| <i>HLA-DMA</i>      | 1.24 | 0.00 | 0.00 | 0.66 | 0.09 | 13 | B Cells |
| <i>RAC2</i>         | 1.24 | 0.00 | 0.00 | 0.68 | 0.08 | 13 | B Cells |
| <i>LINC00926</i>    | 1.22 | 0.00 | 0.00 | 0.49 | 0.01 | 13 | B Cells |
| <i>CYB561A3</i>     | 1.22 | 0.00 | 0.00 | 0.56 | 0.09 | 13 | B Cells |
| <i>IRF8</i>         | 1.22 | 0.00 | 0.00 | 0.53 | 0.04 | 13 | B Cells |
| <i>BANK1</i>        | 1.21 | 0.00 | 0.00 | 0.53 | 0.00 | 13 | B Cells |
| <i>RCSD1</i>        | 1.2  | 0.00 | 0.00 | 0.67 | 0.18 | 13 | B Cells |
| <i>PTPN6</i>        | 1.2  | 0.00 | 0.00 | 0.57 | 0.07 | 13 | B Cells |
| <i>ISG20</i>        | 1.18 | 0.00 | 0.00 | 0.57 | 0.05 | 13 | B Cells |
| <i>FCMR</i>         | 1.18 | 0.00 | 0.00 | 0.52 | 0.03 | 13 | B Cells |
| <i>CLEC2D</i>       | 1.16 | 0.00 | 0.00 | 0.62 | 0.08 | 13 | B Cells |
| <i>CD19</i>         | 1.15 | 0.00 | 0.00 | 0.49 | 0.00 | 13 | B Cells |
| <i>SMIM14</i>       | 1.07 | 0.00 | 0.00 | 0.58 | 0.22 | 13 | B Cells |
| <i>PCDH9</i>        | 1.07 | 0.00 | 0.00 | 0.28 | 0.04 | 13 | B Cells |
| <i>FCRL1</i>        | 1.06 | 0.00 | 0.00 | 0.42 | 0.00 | 13 | B Cells |
| <i>RP5-887A10.1</i> | 1.05 | 0.00 | 0.00 | 0.33 | 0.00 | 13 | B Cells |
| <i>HLA-DQA1</i>     | 1.05 | 0.00 | 0.00 | 0.47 | 0.03 | 13 | B Cells |
| <i>CSK</i>          | 1    | 0.00 | 0.00 | 0.49 | 0.08 | 13 | B Cells |
| <i>CD22</i>         | 1    | 0.00 | 0.00 | 0.41 | 0.01 | 13 | B Cells |
| <i>CD53</i>         | 0.99 | 0.00 | 0.00 | 0.60 | 0.09 | 13 | B Cells |
| <i>RHOH</i>         | 0.99 | 0.00 | 0.00 | 0.44 | 0.02 | 13 | B Cells |
| <i>KIAA0226L</i>    | 0.98 | 0.00 | 0.00 | 0.42 | 0.01 | 13 | B Cells |
| <i>ARHGDIB</i>      | 0.97 | 0.00 | 0.00 | 0.77 | 0.30 | 13 | B Cells |
| <i>LSP1</i>         | 0.96 | 0.00 | 0.00 | 0.60 | 0.10 | 13 | B Cells |
| <i>BTG1</i>         | 0.96 | 0.00 | 0.00 | 0.99 | 0.68 | 13 | B Cells |
| <i>FCER2</i>        | 0.95 | 0.00 | 0.00 | 0.33 | 0.01 | 13 | B Cells |
| <i>GPSM3</i>        | 0.94 | 0.00 | 0.00 | 0.60 | 0.14 | 13 | B Cells |
| <i>JUNB</i>         | 0.93 | 0.00 | 0.00 | 0.80 | 0.52 | 13 | B Cells |
| <i>TNFRSF13C</i>    | 0.93 | 0.00 | 0.00 | 0.41 | 0.00 | 13 | B Cells |
| <i>LY86</i>         | 0.93 | 0.00 | 0.00 | 0.47 | 0.04 | 13 | B Cells |
| <i>CD72</i>         | 0.93 | 0.00 | 0.00 | 0.38 | 0.01 | 13 | B Cells |
| <i>RALGPS2</i>      | 0.91 | 0.00 | 0.00 | 0.34 | 0.02 | 13 | B Cells |
| <i>HLA-DQA2</i>     | 0.9  | 0.00 | 0.00 | 0.43 | 0.03 | 13 | B Cells |
| <i>PTPRC</i>        | 0.9  | 0.00 | 0.00 | 0.49 | 0.08 | 13 | B Cells |
| <i>SP140</i>        | 0.9  | 0.00 | 0.00 | 0.39 | 0.01 | 13 | B Cells |
| <i>IL2RG</i>        | 0.9  | 0.00 | 0.00 | 0.43 | 0.05 | 13 | B Cells |
| <i>DNAJB1</i>       | 0.9  | 0.00 | 0.00 | 0.49 | 0.21 | 13 | B Cells |
| <i>CYBA</i>         | 0.9  | 0.00 | 0.00 | 0.90 | 0.52 | 13 | B Cells |
| <i>TBC1D10C</i>     | 0.88 | 0.00 | 0.00 | 0.37 | 0.03 | 13 | B Cells |
| <i>DRAM2</i>        | 0.84 | 0.00 | 0.00 | 0.47 | 0.14 | 13 | B Cells |

|                      |      |      |      |      |      |    |         |
|----------------------|------|------|------|------|------|----|---------|
| <i>POU2F2</i>        | 0.83 | 0.00 | 0.00 | 0.35 | 0.02 | 13 | B Cells |
| <i>LYN</i>           | 0.83 | 0.00 | 0.00 | 0.44 | 0.09 | 13 | B Cells |
| <i>SMCHD1</i>        | 0.83 | 0.00 | 0.00 | 0.44 | 0.12 | 13 | B Cells |
| <i>LAT2</i>          | 0.83 | 0.00 | 0.00 | 0.30 | 0.04 | 13 | B Cells |
| <i>TSTD1</i>         | 0.83 | 0.00 | 0.00 | 0.44 | 0.07 | 13 | B Cells |
| <i>DUSP1</i>         | 0.83 | 0.00 | 0.00 | 0.63 | 0.41 | 13 | B Cells |
| <i>BTK</i>           | 0.83 | 0.00 | 0.00 | 0.34 | 0.02 | 13 | B Cells |
| <i>HSH2D</i>         | 0.83 | 0.00 | 0.00 | 0.34 | 0.01 | 13 | B Cells |
| <i>PRKCB</i>         | 0.82 | 0.00 | 0.00 | 0.39 | 0.08 | 13 | B Cells |
| <i>NAPSB</i>         | 0.82 | 0.00 | 0.00 | 0.34 | 0.03 | 13 | B Cells |
| <i>RPS27</i>         | 0.82 | 0.00 | 0.00 | 1.00 | 1.00 | 13 | B Cells |
| <i>SWAP70</i>        | 0.82 | 0.00 | 0.00 | 0.42 | 0.10 | 13 | B Cells |
| <i>ALOX5</i>         | 0.82 | 0.00 | 0.00 | 0.30 | 0.03 | 13 | B Cells |
| <i>RNASET2</i>       | 0.81 | 0.00 | 0.00 | 0.56 | 0.18 | 13 | B Cells |
| <i>FCRL5</i>         | 0.81 | 0.00 | 0.00 | 0.27 | 0.00 | 13 | B Cells |
| <i>IER2</i>          | 0.81 | 0.00 | 0.00 | 0.70 | 0.46 | 13 | B Cells |
| <i>RPL18AP3</i>      | 0.8  | 0.00 | 0.00 | 0.96 | 0.94 | 13 | B Cells |
| <i>ERP29</i>         | 0.8  | 0.00 | 0.00 | 0.67 | 0.37 | 13 | B Cells |
| <i>RPL28</i>         | 0.8  | 0.00 | 0.00 | 0.99 | 0.98 | 13 | B Cells |
| <i>LRMP</i>          | 0.79 | 0.00 | 0.00 | 0.25 | 0.01 | 13 | B Cells |
| <i>SP110</i>         | 0.79 | 0.00 | 0.00 | 0.33 | 0.09 | 13 | B Cells |
| <i>NCF1B</i>         | 0.79 | 0.00 | 0.00 | 0.27 | 0.00 | 13 | B Cells |
| <i>SIT1</i>          | 0.78 | 0.00 | 0.00 | 0.32 | 0.00 | 13 | B Cells |
| <i>CAPG</i>          | 0.77 | 0.00 | 0.00 | 0.38 | 0.08 | 13 | B Cells |
| <i>FAM65B</i>        | 0.77 | 0.00 | 0.00 | 0.34 | 0.04 | 13 | B Cells |
| <i>FAM26F</i>        | 0.77 | 0.00 | 0.00 | 0.37 | 0.03 | 13 | B Cells |
| <i>CD48</i>          | 0.77 | 0.00 | 0.00 | 0.41 | 0.06 | 13 | B Cells |
| <i>RPS29</i>         | 0.77 | 0.00 | 0.00 | 1.00 | 0.99 | 13 | B Cells |
| <i>CD69</i>          | 0.77 | 0.00 | 0.00 | 0.28 | 0.02 | 13 | B Cells |
| <i>C16orf74</i>      | 0.76 | 0.00 | 0.00 | 0.28 | 0.03 | 13 | B Cells |
| <i>SELL</i>          | 0.76 | 0.00 | 0.00 | 0.29 | 0.04 | 13 | B Cells |
| <i>EEF1B2</i>        | 0.76 | 0.00 | 0.00 | 0.84 | 0.74 | 13 | B Cells |
| <i>RPL18A</i>        | 0.76 | 0.00 | 0.00 | 0.99 | 0.99 | 13 | B Cells |
| <i>RPSA</i>          | 0.76 | 0.00 | 0.00 | 0.91 | 0.90 | 13 | B Cells |
| <i>RPS2P5</i>        | 0.75 | 0.00 | 0.00 | 0.84 | 0.74 | 13 | B Cells |
| <i>HSPA1B</i>        | 0.75 | 0.00 | 0.00 | 0.66 | 0.38 | 13 | B Cells |
| <i>GADD45B</i>       | 0.74 | 0.00 | 0.00 | 0.73 | 0.42 | 13 | B Cells |
| <i>PHACTR1</i>       | 0.74 | 0.00 | 0.00 | 0.25 | 0.05 | 13 | B Cells |
| <i>MYLIP</i>         | 0.74 | 0.00 | 0.03 | 0.52 | 0.30 | 13 | B Cells |
| <i>MARC1</i>         | 0.73 | 0.00 | 0.00 | 0.29 | 0.02 | 13 | B Cells |
| <i>FOSB</i>          | 0.72 | 0.00 | 0.00 | 0.43 | 0.14 | 13 | B Cells |
| <i>RP11-761N21.2</i> | 0.72 | 0.00 | 0.00 | 0.82 | 0.63 | 13 | B Cells |

|                     |      |      |      |      |      |    |         |
|---------------------|------|------|------|------|------|----|---------|
| <i>BCL11A</i>       | 0.72 | 0.00 | 0.00 | 0.25 | 0.01 | 13 | B Cells |
| <i>ZCCHC7</i>       | 0.72 | 0.00 | 0.00 | 0.30 | 0.09 | 13 | B Cells |
| <i>IKZF1</i>        | 0.71 | 0.00 | 0.00 | 0.29 | 0.03 | 13 | B Cells |
| <i>LCP1</i>         | 0.71 | 0.00 | 0.00 | 0.42 | 0.08 | 13 | B Cells |
| <i>STX7</i>         | 0.71 | 0.00 | 0.00 | 0.37 | 0.15 | 13 | B Cells |
| <i>RP4-765C7.2</i>  | 0.71 | 0.00 | 0.02 | 0.63 | 0.51 | 13 | B Cells |
| <i>STK4</i>         | 0.71 | 0.00 | 0.00 | 0.48 | 0.16 | 13 | B Cells |
| <i>RPS19</i>        | 0.71 | 0.00 | 0.00 | 0.99 | 0.99 | 13 | B Cells |
| <i>RASGRP2</i>      | 0.7  | 0.00 | 0.00 | 0.33 | 0.06 | 13 | B Cells |
| <i>EEF1B2P6</i>     | 0.7  | 0.00 | 0.00 | 0.72 | 0.42 | 13 | B Cells |
| <i>RPS21</i>        | 0.69 | 0.00 | 0.00 | 0.99 | 0.93 | 13 | B Cells |
| <i>ACAP1</i>        | 0.69 | 0.00 | 0.00 | 0.32 | 0.05 | 13 | B Cells |
| <i>EVI2B</i>        | 0.69 | 0.00 | 0.00 | 0.35 | 0.03 | 13 | B Cells |
| <i>ARHGAP4</i>      | 0.69 | 0.00 | 0.00 | 0.32 | 0.05 | 13 | B Cells |
| <i>AFF3</i>         | 0.69 | 0.00 | 0.00 | 0.30 | 0.05 | 13 | B Cells |
| <i>QRSL1</i>        | 0.69 | 0.00 | 0.00 | 0.29 | 0.05 | 13 | B Cells |
| <i>BLNK</i>         | 0.68 | 0.00 | 0.00 | 0.29 | 0.00 | 13 | B Cells |
| <i>ARPC1B</i>       | 0.68 | 0.00 | 0.00 | 0.73 | 0.31 | 13 | B Cells |
| <i>RPL22L1</i>      | 0.68 | 0.00 | 0.00 | 0.54 | 0.22 | 13 | B Cells |
| <i>HLA-DQB1</i>     | 0.68 | 0.00 | 0.00 | 0.43 | 0.05 | 13 | B Cells |
| <i>ARPC3</i>        | 0.67 | 0.00 | 0.00 | 0.81 | 0.61 | 13 | B Cells |
| <i>CXXC5</i>        | 0.67 | 0.00 | 0.00 | 0.32 | 0.09 | 13 | B Cells |
| <i>RP11-38614.4</i> | 0.67 | 0.00 | 0.00 | 0.27 | 0.06 | 13 | B Cells |
| <i>HLA-DOB</i>      | 0.66 | 0.00 | 0.00 | 0.28 | 0.00 | 13 | B Cells |
| <i>DAPP1</i>        | 0.66 | 0.00 | 0.00 | 0.28 | 0.02 | 13 | B Cells |
| <i>NCF1</i>         | 0.66 | 0.00 | 0.00 | 0.30 | 0.01 | 13 | B Cells |
| <i>PARP1</i>        | 0.66 | 0.00 | 0.00 | 0.43 | 0.20 | 13 | B Cells |
| <i>PABPC1</i>       | 0.66 | 0.00 | 0.00 | 0.94 | 0.74 | 13 | B Cells |
| <i>HIST1H1C</i>     | 0.65 | 0.00 | 0.00 | 0.27 | 0.09 | 13 | B Cells |
| <i>SEPT1</i>        | 0.65 | 0.00 | 0.00 | 0.29 | 0.05 | 13 | B Cells |
| <i>RPSAP58</i>      | 0.65 | 0.00 | 0.00 | 0.63 | 0.47 | 13 | B Cells |
| <i>IKZF3</i>        | 0.65 | 0.00 | 0.00 | 0.25 | 0.01 | 13 | B Cells |
| <i>TAPBP</i>        | 0.65 | 0.00 | 0.00 | 0.58 | 0.25 | 13 | B Cells |
| <i>ARHGAP30</i>     | 0.65 | 0.00 | 0.00 | 0.32 | 0.04 | 13 | B Cells |
| <i>RGS19</i>        | 0.64 | 0.00 | 0.00 | 0.27 | 0.08 | 13 | B Cells |
| <i>ALOX5AP</i>      | 0.64 | 0.00 | 0.00 | 0.29 | 0.03 | 13 | B Cells |
| <i>ICAM3</i>        | 0.64 | 0.00 | 0.00 | 0.38 | 0.08 | 13 | B Cells |
| <i>ST6GAL1</i>      | 0.64 | 0.00 | 0.00 | 0.25 | 0.04 | 13 | B Cells |
| <i>AC097523.1</i>   | 0.64 | 0.00 | 0.00 | 0.68 | 0.43 | 13 | B Cells |
| <i>HCLS1</i>        | 0.64 | 0.00 | 0.00 | 0.38 | 0.07 | 13 | B Cells |
| <i>RPL39</i>        | 0.63 | 0.00 | 0.00 | 1.00 | 0.99 | 13 | B Cells |
| <i>HCK</i>          | 0.63 | 0.00 | 0.00 | 0.25 | 0.06 | 13 | B Cells |

|                     |      |      |      |      |      |    |         |
|---------------------|------|------|------|------|------|----|---------|
| <i>PSMB9</i>        | 0.63 | 0.00 | 0.00 | 0.54 | 0.21 | 13 | B Cells |
| <i>CD83</i>         | 0.63 | 0.00 | 0.00 | 0.28 | 0.06 | 13 | B Cells |
| <i>CYFIP2</i>       | 0.63 | 0.00 | 0.00 | 0.27 | 0.03 | 13 | B Cells |
| <i>RPS2</i>         | 0.62 | 0.00 | 0.00 | 1.00 | 0.99 | 13 | B Cells |
| <i>SP100</i>        | 0.62 | 0.00 | 0.00 | 0.47 | 0.19 | 13 | B Cells |
| <i>HVCN1</i>        | 0.62 | 0.00 | 0.00 | 0.29 | 0.05 | 13 | B Cells |
| <i>ELF1</i>         | 0.62 | 0.00 | 0.00 | 0.37 | 0.16 | 13 | B Cells |
| <i>TNFAIP8</i>      | 0.61 | 0.00 | 0.00 | 0.33 | 0.09 | 13 | B Cells |
| <i>RP11-796E2.4</i> | 0.61 | 0.00 | 0.00 | 0.29 | 0.10 | 13 | B Cells |
| <i>ORAI2</i>        | 0.61 | 0.00 | 0.00 | 0.27 | 0.06 | 13 | B Cells |
| <i>RPL13P12</i>     | 0.61 | 0.00 | 0.00 | 0.96 | 0.96 | 13 | B Cells |
| <i>RPLP2</i>        | 0.61 | 0.00 | 0.00 | 1.00 | 0.99 | 13 | B Cells |
| <i>RP11-889L3.1</i> | 0.6  | 0.00 | 0.00 | 0.92 | 0.86 | 13 | B Cells |
| <i>PIM2</i>         | 0.6  | 0.00 | 0.00 | 0.28 | 0.02 | 13 | B Cells |
| <i>EVL</i>          | 0.6  | 0.00 | 0.00 | 0.49 | 0.19 | 13 | B Cells |
| <i>HIP1R</i>        | 0.59 | 0.00 | 0.00 | 0.25 | 0.02 | 13 | B Cells |
| <i>HLA-F</i>        | 0.59 | 0.00 | 0.00 | 0.39 | 0.13 | 13 | B Cells |
| <i>CTSS</i>         | 0.59 | 0.00 | 0.00 | 0.51 | 0.10 | 13 | B Cells |
| <i>DCK</i>          | 0.59 | 0.00 | 0.00 | 0.28 | 0.09 | 13 | B Cells |
| <i>SNX2</i>         | 0.59 | 0.00 | 0.03 | 0.46 | 0.26 | 13 | B Cells |
| <i>SEPT6</i>        | 0.59 | 0.00 | 0.00 | 0.46 | 0.21 | 13 | B Cells |
| <i>SLC38A1</i>      | 0.59 | 0.00 | 0.00 | 0.28 | 0.03 | 13 | B Cells |
| <i>RPL37</i>        | 0.58 | 0.00 | 0.00 | 1.00 | 0.98 | 13 | B Cells |
| <i>RPL12</i>        | 0.58 | 0.00 | 0.00 | 0.99 | 0.97 | 13 | B Cells |
| <i>CYTIP</i>        | 0.58 | 0.00 | 0.00 | 0.29 | 0.04 | 13 | B Cells |
| <i>RPS11</i>        | 0.58 | 0.00 | 0.00 | 0.99 | 0.97 | 13 | B Cells |
| <i>STRBP</i>        | 0.57 | 0.00 | 0.00 | 0.27 | 0.04 | 13 | B Cells |
| <i>SYTL1</i>        | 0.57 | 0.00 | 0.00 | 0.27 | 0.02 | 13 | B Cells |
| <i>RP11-234A1.1</i> | 0.57 | 0.00 | 0.00 | 0.96 | 0.94 | 13 | B Cells |
| <i>RPL13AP5</i>     | 0.56 | 0.00 | 0.00 | 0.95 | 0.94 | 13 | B Cells |
| <i>FOS</i>          | 0.56 | 0.00 | 0.01 | 0.60 | 0.35 | 13 | B Cells |
| <i>BTG2</i>         | 0.56 | 0.00 | 0.02 | 0.42 | 0.21 | 13 | B Cells |
| <i>P2RX5</i>        | 0.56 | 0.00 | 0.00 | 0.25 | 0.00 | 13 | B Cells |
| <i>RP11-864N7.2</i> | 0.55 | 0.00 | 0.00 | 0.94 | 0.90 | 13 | B Cells |
| <i>CD55</i>         | 0.55 | 0.00 | 0.00 | 0.39 | 0.13 | 13 | B Cells |
| <i>RPL12P4</i>      | 0.55 | 0.00 | 0.00 | 0.82 | 0.79 | 13 | B Cells |
| <i>RPS12</i>        | 0.54 | 0.00 | 0.00 | 0.99 | 0.99 | 13 | B Cells |
| <i>STK17B</i>       | 0.54 | 0.00 | 0.00 | 0.25 | 0.06 | 13 | B Cells |
| <i>ODC1</i>         | 0.54 | 0.00 | 0.00 | 0.35 | 0.09 | 13 | B Cells |
| <i>ARHGEF1</i>      | 0.54 | 0.00 | 0.00 | 0.37 | 0.14 | 13 | B Cells |
| <i>HLA-B</i>        | 0.53 | 0.00 | 0.00 | 0.96 | 0.54 | 13 | B Cells |

|                       |      |      |      |      |      |    |         |
|-----------------------|------|------|------|------|------|----|---------|
| <i>RPS18</i>          | 0.53 | 0.00 | 0.00 | 1.00 | 1.00 | 13 | B Cells |
| <i>PLEKHA2</i>        | 0.53 | 0.00 | 0.00 | 0.30 | 0.10 | 13 | B Cells |
| <i>ADPGK</i>          | 0.53 | 0.00 | 0.01 | 0.30 | 0.13 | 13 | B Cells |
| <i>SNX29</i>          | 0.52 | 0.00 | 0.00 | 0.25 | 0.06 | 13 | B Cells |
| <i>RPS23</i>          | 0.52 | 0.00 | 0.00 | 1.00 | 0.99 | 13 | B Cells |
| <i>RPS2P46</i>        | 0.52 | 0.00 | 0.01 | 0.65 | 0.49 | 13 | B Cells |
| <i>RPL13A</i>         | 0.52 | 0.00 | 0.00 | 0.99 | 1.00 | 13 | B Cells |
| <i>RPL19</i>          | 0.52 | 0.00 | 0.00 | 1.00 | 0.99 | 13 | B Cells |
| <i>AC004453.8</i>     | 0.52 | 0.00 | 0.00 | 0.92 | 0.86 | 13 | B Cells |
| <i>RPL13</i>          | 0.52 | 0.00 | 0.00 | 1.00 | 1.00 | 13 | B Cells |
| <i>RPS10</i>          | 0.52 | 0.00 | 0.00 | 0.95 | 0.90 | 13 | B Cells |
| <i>RPL23A</i>         | 0.52 | 0.00 | 0.00 | 0.99 | 0.98 | 13 | B Cells |
| <i>SIPA1</i>          | 0.51 | 0.00 | 0.00 | 0.30 | 0.08 | 13 | B Cells |
| <i>CD40</i>           | 0.51 | 0.00 | 0.00 | 0.28 | 0.10 | 13 | B Cells |
| <i>RPS5</i>           | 0.51 | 0.00 | 0.00 | 0.95 | 0.96 | 13 | B Cells |
| <i>WAS</i>            | 0.51 | 0.00 | 0.00 | 0.25 | 0.04 | 13 | B Cells |
| <i>HMGA1</i>          | 0.5  | 0.00 | 0.00 | 0.33 | 0.10 | 13 | B Cells |
| <i>LYL1</i>           | 0.5  | 0.00 | 0.01 | 0.28 | 0.11 | 13 | B Cells |
| <i>RPL23AP42</i>      | 0.5  | 0.00 | 0.01 | 0.79 | 0.67 | 13 | B Cells |
| <i>RP11-425L10.1</i>  | 0.49 | 0.00 | 0.00 | 0.89 | 0.84 | 13 | B Cells |
| <i>RP11-475C16.1</i>  | 0.49 | 0.00 | 0.00 | 0.90 | 0.83 | 13 | B Cells |
| <i>CTD-2192J16.15</i> | 0.49 | 0.00 | 0.00 | 0.92 | 0.91 | 13 | B Cells |
| <i>COTL1</i>          | 0.49 | 0.00 | 0.00 | 0.52 | 0.20 | 13 | B Cells |
| <i>IRF7</i>           | 0.48 | 0.00 | 0.00 | 0.25 | 0.08 | 13 | B Cells |
| <i>KLF2</i>           | 0.48 | 0.00 | 0.00 | 0.39 | 0.18 | 13 | B Cells |
| <i>PSMB10</i>         | 0.48 | 0.00 | 0.00 | 0.52 | 0.25 | 13 | B Cells |
| <i>SPINT2</i>         | 0.47 | 0.00 | 0.00 | 0.39 | 0.15 | 13 | B Cells |
| <i>RPS23P8</i>        | 0.47 | 0.00 | 0.01 | 0.82 | 0.83 | 13 | B Cells |
| <i>GGA2</i>           | 0.47 | 0.00 | 0.00 | 0.25 | 0.09 | 13 | B Cells |
| <i>HLA-C</i>          | 0.47 | 0.00 | 0.00 | 0.90 | 0.54 | 13 | B Cells |
| <i>AB019441.29</i>    | 0.46 | 0.00 | 0.01 | 0.66 | 0.47 | 13 | B Cells |
| <i>DDX5</i>           | 0.46 | 0.00 | 0.00 | 0.92 | 0.79 | 13 | B Cells |
| <i>RP11-832N8.1</i>   | 0.46 | 0.00 | 0.01 | 0.39 | 0.19 | 13 | B Cells |
| <i>RPLP0</i>          | 0.46 | 0.00 | 0.00 | 0.96 | 0.93 | 13 | B Cells |
| <i>SMC6</i>           | 0.46 | 0.00 | 0.00 | 0.29 | 0.08 | 13 | B Cells |
| <i>LGALS9</i>         | 0.45 | 0.00 | 0.00 | 0.34 | 0.10 | 13 | B Cells |
| <i>RPS15A</i>         | 0.45 | 0.00 | 0.00 | 0.99 | 0.99 | 13 | B Cells |
| <i>RPL32</i>          | 0.44 | 0.00 | 0.00 | 1.00 | 0.99 | 13 | B Cells |
| <i>RPL27A</i>         | 0.43 | 0.00 | 0.00 | 1.00 | 0.99 | 13 | B Cells |
| <i>GLTSCR2</i>        | 0.43 | 0.00 | 0.03 | 0.82 | 0.73 | 13 | B Cells |
| <i>RPL34</i>          | 0.43 | 0.00 | 0.00 | 1.00 | 1.00 | 13 | B Cells |

|                      |      |      |      |      |      |    |                      |
|----------------------|------|------|------|------|------|----|----------------------|
| <i>RPL26</i>         | 0.43 | 0.00 | 0.00 | 0.98 | 0.99 | 13 | B Cells              |
| <i>RPL10</i>         | 0.42 | 0.00 | 0.00 | 1.00 | 1.00 | 13 | B Cells              |
| <i>RPL29</i>         | 0.42 | 0.00 | 0.00 | 0.98 | 0.97 | 13 | B Cells              |
| <i>IRF1</i>          | 0.42 | 0.00 | 0.04 | 0.41 | 0.20 | 13 | B Cells              |
| <i>RPS13</i>         | 0.41 | 0.00 | 0.00 | 1.00 | 0.97 | 13 | B Cells              |
| <i>PDE7A</i>         | 0.41 | 0.00 | 0.00 | 0.25 | 0.05 | 13 | B Cells              |
| <i>RACK1</i>         | 0.41 | 0.00 | 0.00 | 0.98 | 0.96 | 13 | B Cells              |
| <i>RPL30</i>         | 0.41 | 0.00 | 0.00 | 0.99 | 0.98 | 13 | B Cells              |
| <i>RPS24</i>         | 0.4  | 0.00 | 0.00 | 1.00 | 0.98 | 13 | B Cells              |
| <i>RPS28</i>         | 0.4  | 0.00 | 0.00 | 0.99 | 0.99 | 13 | B Cells              |
| <i>ELOVL5</i>        | 0.4  | 0.00 | 0.02 | 0.32 | 0.13 | 13 | B Cells              |
| <i>DHPS</i>          | 0.4  | 0.00 | 0.03 | 0.42 | 0.21 | 13 | B Cells              |
| <i>RPL26P19</i>      | 0.4  | 0.00 | 0.01 | 0.87 | 0.86 | 13 | B Cells              |
| <i>RPS3</i>          | 0.4  | 0.00 | 0.00 | 0.99 | 0.98 | 13 | B Cells              |
| <i>RP11-371A22.1</i> | 0.4  | 0.00 | 0.02 | 0.87 | 0.86 | 13 | B Cells              |
| <i>RPS14</i>         | 0.39 | 0.00 | 0.00 | 1.00 | 1.00 | 13 | B Cells              |
| <i>B2M</i>           | 0.38 | 0.00 | 0.00 | 1.00 | 0.99 | 13 | B Cells              |
| <i>RPS3A</i>         | 0.37 | 0.00 | 0.00 | 1.00 | 0.99 | 13 | B Cells              |
| <i>RPS17</i>         | 0.37 | 0.00 | 0.00 | 0.94 | 0.98 | 13 | B Cells              |
| <i>ZNF581</i>        | 0.37 | 0.00 | 0.03 | 0.25 | 0.10 | 13 | B Cells              |
| <i>C17orf62</i>      | 0.37 | 0.00 | 0.04 | 0.33 | 0.15 | 13 | B Cells              |
| <i>RPL18</i>         | 0.36 | 0.00 | 0.00 | 0.98 | 0.98 | 13 | B Cells              |
| <i>ITGB2</i>         | 0.36 | 0.00 | 0.00 | 0.29 | 0.08 | 13 | B Cells              |
| <i>HLA-A</i>         | 0.35 | 0.00 | 0.00 | 0.96 | 0.70 | 13 | B Cells              |
| <i>RPL27</i>         | 0.35 | 0.00 | 0.00 | 0.96 | 0.96 | 13 | B Cells              |
| <i>RPL11</i>         | 0.35 | 0.00 | 0.00 | 1.00 | 0.99 | 13 | B Cells              |
| <i>RPS8</i>          | 0.33 | 0.00 | 0.00 | 1.00 | 0.99 | 13 | B Cells              |
| <i>UBA52</i>         | 0.32 | 0.00 | 0.00 | 0.98 | 0.95 | 13 | B Cells              |
| <i>RPL35</i>         | 0.32 | 0.00 | 0.00 | 0.98 | 0.98 | 13 | B Cells              |
| <i>RPLP1</i>         | 0.32 | 0.00 | 0.00 | 1.00 | 1.00 | 13 | B Cells              |
| <i>RPS25</i>         | 0.32 | 0.00 | 0.00 | 0.96 | 0.98 | 13 | B Cells              |
| <i>RPL36</i>         | 0.31 | 0.00 | 0.00 | 1.00 | 0.99 | 13 | B Cells              |
| <i>RPS6</i>          | 0.31 | 0.00 | 0.00 | 0.95 | 0.99 | 13 | B Cells              |
| <i>RPL31</i>         | 0.3  | 0.00 | 0.00 | 0.98 | 0.98 | 13 | B Cells              |
| <i>SPI1</i>          | 0.29 | 0.00 | 0.00 | 0.28 | 0.07 | 13 | B Cells              |
| <i>RPL8</i>          | 0.28 | 0.00 | 0.00 | 0.98 | 0.99 | 13 | B Cells              |
| <i>RPS9</i>          | 0.28 | 0.00 | 0.00 | 0.99 | 0.98 | 13 | B Cells              |
| <i>RPS4X</i>         | 0.27 | 0.00 | 0.00 | 0.99 | 0.99 | 13 | B Cells              |
| <i>SFTPC</i>         | 4.13 | 0.00 | 0.00 | 0.40 | 0.09 | 14 | AT2 Epithelial Cells |
| <i>SFTPB</i>         | 3.51 | 0.00 | 0.00 | 0.62 | 0.08 | 14 | AT2 Epithelial Cells |
| <i>AGER</i>          | 3.24 | 0.00 | 0.00 | 0.82 | 0.04 | 14 | AT2 Epithelial Cells |
| <i>SFTPA1</i>        | 2.57 | 0.00 | 0.00 | 0.32 | 0.02 | 14 | AT2 Epithelial Cells |

|                 |      |      |      |      |      |    |                      |
|-----------------|------|------|------|------|------|----|----------------------|
| <i>KRT19</i>    | 2.43 | 0.00 | 0.00 | 0.87 | 0.02 | 14 | AT2 Epithelial Cells |
| <i>GPRC5A</i>   | 2.27 | 0.00 | 0.00 | 0.86 | 0.02 | 14 | AT2 Epithelial Cells |
| <i>KRT8</i>     | 2.14 | 0.00 | 0.00 | 0.83 | 0.07 | 14 | AT2 Epithelial Cells |
| <i>NAPSA</i>    | 2.11 | 0.00 | 0.00 | 0.49 | 0.02 | 14 | AT2 Epithelial Cells |
| <i>ELF3</i>     | 2.11 | 0.00 | 0.00 | 0.82 | 0.02 | 14 | AT2 Epithelial Cells |
| <i>FOLR1</i>    | 2.09 | 0.00 | 0.00 | 0.86 | 0.04 | 14 | AT2 Epithelial Cells |
| <i>SLC34A2</i>  | 2.03 | 0.00 | 0.00 | 0.58 | 0.01 | 14 | AT2 Epithelial Cells |
| <i>KRT18</i>    | 2.03 | 0.00 | 0.00 | 0.83 | 0.12 | 14 | AT2 Epithelial Cells |
| <i>FXYD3</i>    | 2.02 | 0.00 | 0.00 | 0.89 | 0.02 | 14 | AT2 Epithelial Cells |
| <i>C19orf33</i> | 2.02 | 0.00 | 0.00 | 0.82 | 0.02 | 14 | AT2 Epithelial Cells |
| <i>LMO7</i>     | 2    | 0.00 | 0.00 | 0.81 | 0.07 | 14 | AT2 Epithelial Cells |
| <i>CLIC3</i>    | 1.97 | 0.00 | 0.00 | 0.74 | 0.05 | 14 | AT2 Epithelial Cells |
| <i>TACSTD2</i>  | 1.89 | 0.00 | 0.00 | 0.74 | 0.02 | 14 | AT2 Epithelial Cells |
| <i>AQP4</i>     | 1.89 | 0.00 | 0.00 | 0.78 | 0.01 | 14 | AT2 Epithelial Cells |
| <i>AGR3</i>     | 1.87 | 0.00 | 0.00 | 0.46 | 0.02 | 14 | AT2 Epithelial Cells |
| <i>KRT7</i>     | 1.86 | 0.00 | 0.00 | 0.53 | 0.01 | 14 | AT2 Epithelial Cells |
| <i>CLDN18</i>   | 1.85 | 0.00 | 0.00 | 0.81 | 0.01 | 14 | AT2 Epithelial Cells |
| <i>CLDN4</i>    | 1.82 | 0.00 | 0.00 | 0.76 | 0.02 | 14 | AT2 Epithelial Cells |
| <i>HOPX</i>     | 1.81 | 0.00 | 0.00 | 0.83 | 0.11 | 14 | AT2 Epithelial Cells |
| <i>MSLN</i>     | 1.8  | 0.00 | 0.00 | 0.71 | 0.01 | 14 | AT2 Epithelial Cells |
| <i>TSPAN13</i>  | 1.74 | 0.00 | 0.00 | 0.83 | 0.13 | 14 | AT2 Epithelial Cells |
| <i>MUC1</i>     | 1.69 | 0.00 | 0.00 | 0.64 | 0.01 | 14 | AT2 Epithelial Cells |
| <i>NKX2-1</i>   | 1.69 | 0.00 | 0.00 | 0.85 | 0.01 | 14 | AT2 Epithelial Cells |
| <i>EPCAM</i>    | 1.68 | 0.00 | 0.00 | 0.78 | 0.02 | 14 | AT2 Epithelial Cells |
| <i>NPC2</i>     | 1.63 | 0.00 | 0.00 | 0.72 | 0.50 | 14 | AT2 Epithelial Cells |
| <i>SFTPD</i>    | 1.51 | 0.00 | 0.00 | 0.42 | 0.01 | 14 | AT2 Epithelial Cells |
| <i>AGR2</i>     | 1.51 | 0.00 | 0.00 | 0.54 | 0.02 | 14 | AT2 Epithelial Cells |
| <i>EMP2</i>     | 1.5  | 0.00 | 0.00 | 0.89 | 0.49 | 14 | AT2 Epithelial Cells |
| <i>RTKN2</i>    | 1.5  | 0.00 | 0.00 | 0.45 | 0.01 | 14 | AT2 Epithelial Cells |
| <i>CPM</i>      | 1.49 | 0.00 | 0.00 | 0.73 | 0.04 | 14 | AT2 Epithelial Cells |
| <i>CD55</i>     | 1.48 | 0.00 | 0.00 | 0.72 | 0.12 | 14 | AT2 Epithelial Cells |
| <i>S100A10</i>  | 1.47 | 0.00 | 0.00 | 0.95 | 0.65 | 14 | AT2 Epithelial Cells |
| <i>SLPI</i>     | 1.46 | 0.00 | 0.00 | 0.37 | 0.04 | 14 | AT2 Epithelial Cells |
| <i>SFTA2</i>    | 1.46 | 0.00 | 0.00 | 0.64 | 0.01 | 14 | AT2 Epithelial Cells |
| <i>HIST1H1C</i> | 1.41 | 0.00 | 0.00 | 0.45 | 0.09 | 14 | AT2 Epithelial Cells |
| <i>CLDN7</i>    | 1.4  | 0.00 | 0.00 | 0.56 | 0.03 | 14 | AT2 Epithelial Cells |
| <i>ANXA2</i>    | 1.38 | 0.00 | 0.00 | 0.99 | 0.65 | 14 | AT2 Epithelial Cells |
| <i>SDC4</i>     | 1.38 | 0.00 | 0.00 | 0.59 | 0.04 | 14 | AT2 Epithelial Cells |
| <i>ANXA3</i>    | 1.36 | 0.00 | 0.00 | 0.68 | 0.12 | 14 | AT2 Epithelial Cells |
| <i>MGST1</i>    | 1.35 | 0.00 | 0.00 | 0.64 | 0.03 | 14 | AT2 Epithelial Cells |
| <i>TNNC1</i>    | 1.35 | 0.00 | 0.00 | 0.39 | 0.01 | 14 | AT2 Epithelial Cells |
| <i>CYP4B1</i>   | 1.32 | 0.00 | 0.00 | 0.44 | 0.01 | 14 | AT2 Epithelial Cells |
| <i>SDC1</i>     | 1.31 | 0.00 | 0.00 | 0.63 | 0.02 | 14 | AT2 Epithelial Cells |

|                  |      |      |      |      |      |    |                      |
|------------------|------|------|------|------|------|----|----------------------|
| <i>ATP1B1</i>    | 1.3  | 0.00 | 0.00 | 0.78 | 0.22 | 14 | AT2 Epithelial Cells |
| <i>HSD17B6</i>   | 1.29 | 0.00 | 0.00 | 0.58 | 0.01 | 14 | AT2 Epithelial Cells |
| <i>S100A14</i>   | 1.29 | 0.00 | 0.00 | 0.60 | 0.01 | 14 | AT2 Epithelial Cells |
| <i>SPINT2</i>    | 1.28 | 0.00 | 0.00 | 0.80 | 0.14 | 14 | AT2 Epithelial Cells |
| <i>ID1</i>       | 1.22 | 0.00 | 0.00 | 0.91 | 0.34 | 14 | AT2 Epithelial Cells |
| <i>F3</i>        | 1.22 | 0.00 | 0.00 | 0.49 | 0.03 | 14 | AT2 Epithelial Cells |
| <i>EFEMP1</i>    | 1.21 | 0.00 | 0.00 | 0.67 | 0.07 | 14 | AT2 Epithelial Cells |
| <i>MRPL14</i>    | 1.2  | 0.00 | 0.00 | 0.74 | 0.23 | 14 | AT2 Epithelial Cells |
| <i>ATP11A</i>    | 1.2  | 0.00 | 0.00 | 0.68 | 0.05 | 14 | AT2 Epithelial Cells |
| <i>C3</i>        | 1.17 | 0.00 | 0.00 | 0.40 | 0.04 | 14 | AT2 Epithelial Cells |
| <i>SAT1</i>      | 1.16 | 0.00 | 0.00 | 0.89 | 0.56 | 14 | AT2 Epithelial Cells |
| <i>MALL</i>      | 1.16 | 0.00 | 0.00 | 0.47 | 0.05 | 14 | AT2 Epithelial Cells |
| <i>EFNA1</i>     | 1.16 | 0.00 | 0.00 | 0.78 | 0.14 | 14 | AT2 Epithelial Cells |
| <i>CD47</i>      | 1.14 | 0.00 | 0.00 | 0.68 | 0.21 | 14 | AT2 Epithelial Cells |
| <i>SPINT1</i>    | 1.14 | 0.00 | 0.00 | 0.60 | 0.02 | 14 | AT2 Epithelial Cells |
| <i>RAB11FIP1</i> | 1.14 | 0.00 | 0.00 | 0.54 | 0.04 | 14 | AT2 Epithelial Cells |
| <i>ATP1A1</i>    | 1.14 | 0.00 | 0.00 | 0.77 | 0.21 | 14 | AT2 Epithelial Cells |
| <i>CYB5A</i>     | 1.13 | 0.00 | 0.00 | 0.87 | 0.35 | 14 | AT2 Epithelial Cells |
| <i>TSTD1</i>     | 1.13 | 0.00 | 0.00 | 0.68 | 0.07 | 14 | AT2 Epithelial Cells |
| <i>AQP5</i>      | 1.12 | 0.00 | 0.00 | 0.42 | 0.01 | 14 | AT2 Epithelial Cells |
| <i>VAMP8</i>     | 1.12 | 0.00 | 0.00 | 0.80 | 0.18 | 14 | AT2 Epithelial Cells |
| <i>ICAM1</i>     | 1.1  | 0.00 | 0.00 | 0.64 | 0.10 | 14 | AT2 Epithelial Cells |
| <i>SELENBP1</i>  | 1.1  | 0.00 | 0.00 | 0.67 | 0.17 | 14 | AT2 Epithelial Cells |
| <i>IFT57</i>     | 1.09 | 0.00 | 0.00 | 0.59 | 0.21 | 14 | AT2 Epithelial Cells |
| <i>CTSH</i>      | 1.09 | 0.00 | 0.00 | 0.53 | 0.14 | 14 | AT2 Epithelial Cells |
| <i>NDNF</i>      | 1.09 | 0.00 | 0.00 | 0.62 | 0.10 | 14 | AT2 Epithelial Cells |
| <i>PRSS8</i>     | 1.07 | 0.00 | 0.00 | 0.51 | 0.00 | 14 | AT2 Epithelial Cells |
| <i>PPDPF</i>     | 1.05 | 0.00 | 0.00 | 0.96 | 0.80 | 14 | AT2 Epithelial Cells |
| <i>ANKRD29</i>   | 1.05 | 0.00 | 0.00 | 0.44 | 0.01 | 14 | AT2 Epithelial Cells |
| <i>DUSP1</i>     | 1.04 | 0.00 | 0.00 | 0.67 | 0.41 | 14 | AT2 Epithelial Cells |
| <i>MMP7</i>      | 1.04 | 0.00 | 0.00 | 0.30 | 0.01 | 14 | AT2 Epithelial Cells |
| <i>CXADR</i>     | 1.02 | 0.00 | 0.00 | 0.53 | 0.03 | 14 | AT2 Epithelial Cells |
| <i>CADM1</i>     | 1.02 | 0.00 | 0.00 | 0.63 | 0.17 | 14 | AT2 Epithelial Cells |
| <i>VSIG2</i>     | 1.01 | 0.00 | 0.00 | 0.54 | 0.02 | 14 | AT2 Epithelial Cells |
| <i>DMKN</i>      | 0.98 | 0.00 | 0.00 | 0.60 | 0.03 | 14 | AT2 Epithelial Cells |
| <i>GJA1</i>      | 0.97 | 0.00 | 0.00 | 0.50 | 0.04 | 14 | AT2 Epithelial Cells |
| <i>VEGFA</i>     | 0.97 | 0.00 | 0.00 | 0.50 | 0.05 | 14 | AT2 Epithelial Cells |
| <i>SEMA3B</i>    | 0.96 | 0.00 | 0.00 | 0.41 | 0.03 | 14 | AT2 Epithelial Cells |
| <i>GSTP1</i>     | 0.96 | 0.00 | 0.00 | 0.97 | 0.83 | 14 | AT2 Epithelial Cells |
| <i>SLC39A8</i>   | 0.95 | 0.00 | 0.00 | 0.46 | 0.02 | 14 | AT2 Epithelial Cells |
| <i>COL4A4</i>    | 0.95 | 0.00 | 0.00 | 0.35 | 0.01 | 14 | AT2 Epithelial Cells |
| <i>SMARCA5</i>   | 0.95 | 0.00 | 0.00 | 0.64 | 0.20 | 14 | AT2 Epithelial Cells |
| <i>PERP</i>      | 0.94 | 0.00 | 0.00 | 0.56 | 0.12 | 14 | AT2 Epithelial Cells |

|                 |      |      |      |      |      |    |                      |
|-----------------|------|------|------|------|------|----|----------------------|
| <i>PEG10</i>    | 0.94 | 0.00 | 0.00 | 0.44 | 0.08 | 14 | AT2 Epithelial Cells |
| <i>LAMP3</i>    | 0.94 | 0.00 | 0.00 | 0.39 | 0.01 | 14 | AT2 Epithelial Cells |
| <i>ICAM4</i>    | 0.93 | 0.00 | 0.00 | 0.35 | 0.01 | 14 | AT2 Epithelial Cells |
| <i>PGC</i>      | 0.93 | 0.00 | 0.00 | 0.27 | 0.00 | 14 | AT2 Epithelial Cells |
| <i>AQP3</i>     | 0.92 | 0.00 | 0.00 | 0.37 | 0.05 | 14 | AT2 Epithelial Cells |
| <i>RAB25</i>    | 0.92 | 0.00 | 0.00 | 0.55 | 0.01 | 14 | AT2 Epithelial Cells |
| <i>KLF5</i>     | 0.91 | 0.00 | 0.00 | 0.49 | 0.01 | 14 | AT2 Epithelial Cells |
| <i>RNU12.1</i>  | 0.91 | 0.00 | 0.00 | 0.40 | 0.11 | 14 | AT2 Epithelial Cells |
| <i>ERBB3</i>    | 0.91 | 0.00 | 0.00 | 0.55 | 0.02 | 14 | AT2 Epithelial Cells |
| <i>PTP4A1</i>   | 0.9  | 0.00 | 0.00 | 0.53 | 0.12 | 14 | AT2 Epithelial Cells |
| <i>MT-ND3</i>   | 0.89 | 0.00 | 0.00 | 1.00 | 0.98 | 14 | AT2 Epithelial Cells |
| <i>ITGA3</i>    | 0.88 | 0.00 | 0.00 | 0.54 | 0.11 | 14 | AT2 Epithelial Cells |
| <i>LAMA3</i>    | 0.88 | 0.00 | 0.00 | 0.36 | 0.01 | 14 | AT2 Epithelial Cells |
| <i>ASAH1</i>    | 0.87 | 0.00 | 0.00 | 0.72 | 0.29 | 14 | AT2 Epithelial Cells |
| <i>C1orf198</i> | 0.87 | 0.00 | 0.00 | 0.49 | 0.13 | 14 | AT2 Epithelial Cells |
| <i>ABCA3</i>    | 0.87 | 0.00 | 0.00 | 0.35 | 0.02 | 14 | AT2 Epithelial Cells |
| <i>UPK3B</i>    | 0.87 | 0.00 | 0.00 | 0.26 | 0.00 | 14 | AT2 Epithelial Cells |
| <i>APLP2</i>    | 0.87 | 0.00 | 0.00 | 0.89 | 0.57 | 14 | AT2 Epithelial Cells |
| <i>CYSTM1</i>   | 0.86 | 0.00 | 0.00 | 0.71 | 0.33 | 14 | AT2 Epithelial Cells |
| <i>H19</i>      | 0.86 | 0.00 | 0.00 | 0.47 | 0.16 | 14 | AT2 Epithelial Cells |
| <i>CRNDE</i>    | 0.86 | 0.00 | 0.00 | 0.50 | 0.01 | 14 | AT2 Epithelial Cells |
| <i>MBIP</i>     | 0.85 | 0.00 | 0.00 | 0.55 | 0.10 | 14 | AT2 Epithelial Cells |
| <i>TMEM125</i>  | 0.85 | 0.00 | 0.00 | 0.49 | 0.02 | 14 | AT2 Epithelial Cells |
| <i>PTPRF</i>    | 0.85 | 0.00 | 0.00 | 0.54 | 0.06 | 14 | AT2 Epithelial Cells |
| <i>HES1</i>     | 0.83 | 0.00 | 0.00 | 0.83 | 0.38 | 14 | AT2 Epithelial Cells |
| <i>LAMA5</i>    | 0.83 | 0.00 | 0.00 | 0.44 | 0.11 | 14 | AT2 Epithelial Cells |
| <i>WIF1</i>     | 0.83 | 0.00 | 0.00 | 0.37 | 0.05 | 14 | AT2 Epithelial Cells |
| <i>C1orf116</i> | 0.83 | 0.00 | 0.00 | 0.49 | 0.01 | 14 | AT2 Epithelial Cells |
| <i>RASSF7</i>   | 0.82 | 0.00 | 0.00 | 0.44 | 0.02 | 14 | AT2 Epithelial Cells |
| <i>DLC1</i>     | 0.82 | 0.00 | 0.00 | 0.69 | 0.23 | 14 | AT2 Epithelial Cells |
| <i>IRX2</i>     | 0.81 | 0.00 | 0.00 | 0.40 | 0.01 | 14 | AT2 Epithelial Cells |
| <i>LIPH</i>     | 0.81 | 0.00 | 0.00 | 0.37 | 0.00 | 14 | AT2 Epithelial Cells |
| <i>CD9</i>      | 0.8  | 0.00 | 0.00 | 0.89 | 0.45 | 14 | AT2 Epithelial Cells |
| <i>PLD3</i>     | 0.8  | 0.00 | 0.00 | 0.78 | 0.35 | 14 | AT2 Epithelial Cells |
| <i>ZFAS1</i>    | 0.8  | 0.00 | 0.00 | 0.91 | 0.59 | 14 | AT2 Epithelial Cells |
| <i>SUSD2</i>    | 0.79 | 0.00 | 0.00 | 0.40 | 0.01 | 14 | AT2 Epithelial Cells |
| <i>CXCL17</i>   | 0.79 | 0.00 | 0.00 | 0.30 | 0.00 | 14 | AT2 Epithelial Cells |
| <i>PEBP4</i>    | 0.79 | 0.00 | 0.00 | 0.36 | 0.01 | 14 | AT2 Epithelial Cells |
| <i>ALCAM</i>    | 0.79 | 0.00 | 0.00 | 0.47 | 0.08 | 14 | AT2 Epithelial Cells |
| <i>PHACTR1</i>  | 0.79 | 0.00 | 0.00 | 0.41 | 0.04 | 14 | AT2 Epithelial Cells |
| <i>CLDN3</i>    | 0.79 | 0.00 | 0.00 | 0.45 | 0.01 | 14 | AT2 Epithelial Cells |
| <i>BCAM</i>     | 0.78 | 0.00 | 0.00 | 0.89 | 0.33 | 14 | AT2 Epithelial Cells |
| <i>BANCR</i>    | 0.78 | 0.00 | 0.00 | 0.27 | 0.00 | 14 | AT2 Epithelial Cells |

|                  |      |      |      |      |      |    |                      |
|------------------|------|------|------|------|------|----|----------------------|
| <i>EVA1A</i>     | 0.78 | 0.00 | 0.00 | 0.45 | 0.01 | 14 | AT2 Epithelial Cells |
| <i>LGALS3</i>    | 0.78 | 0.00 | 0.00 | 0.67 | 0.37 | 14 | AT2 Epithelial Cells |
| <i>ADIRF</i>     | 0.78 | 0.00 | 0.00 | 0.95 | 0.50 | 14 | AT2 Epithelial Cells |
| <i>EPS8L2</i>    | 0.78 | 0.00 | 0.00 | 0.40 | 0.01 | 14 | AT2 Epithelial Cells |
| <i>HIST1H2BG</i> | 0.77 | 0.00 | 0.00 | 0.50 | 0.14 | 14 | AT2 Epithelial Cells |
| <i>SFTA3</i>     | 0.77 | 0.00 | 0.00 | 0.41 | 0.01 | 14 | AT2 Epithelial Cells |
| <i>PRDX5</i>     | 0.76 | 0.00 | 0.00 | 0.86 | 0.56 | 14 | AT2 Epithelial Cells |
| <i>CDH1</i>      | 0.76 | 0.00 | 0.00 | 0.37 | 0.01 | 14 | AT2 Epithelial Cells |
| <i>GKN2</i>      | 0.76 | 0.00 | 0.00 | 0.32 | 0.00 | 14 | AT2 Epithelial Cells |
| <i>MPZL2</i>     | 0.76 | 0.00 | 0.00 | 0.40 | 0.01 | 14 | AT2 Epithelial Cells |
| <i>LAMB3</i>     | 0.75 | 0.00 | 0.00 | 0.36 | 0.01 | 14 | AT2 Epithelial Cells |
| <i>FAM129B</i>   | 0.75 | 0.00 | 0.00 | 0.53 | 0.10 | 14 | AT2 Epithelial Cells |
| <i>ANXA4</i>     | 0.75 | 0.00 | 0.00 | 0.53 | 0.16 | 14 | AT2 Epithelial Cells |
| <i>FILIP1</i>    | 0.75 | 0.00 | 0.00 | 0.47 | 0.18 | 14 | AT2 Epithelial Cells |
| <i>RNASE1</i>    | 0.75 | 0.00 | 0.00 | 0.80 | 0.27 | 14 | AT2 Epithelial Cells |
| <i>C5orf38</i>   | 0.73 | 0.00 | 0.00 | 0.35 | 0.01 | 14 | AT2 Epithelial Cells |
| <i>TMPRSS2</i>   | 0.72 | 0.00 | 0.00 | 0.33 | 0.00 | 14 | AT2 Epithelial Cells |
| <i>PDPN</i>      | 0.72 | 0.00 | 0.00 | 0.39 | 0.05 | 14 | AT2 Epithelial Cells |
| <i>WFDC2</i>     | 0.71 | 0.00 | 0.00 | 0.37 | 0.01 | 14 | AT2 Epithelial Cells |
| <i>CLIC5</i>     | 0.7  | 0.00 | 0.00 | 0.37 | 0.06 | 14 | AT2 Epithelial Cells |
| <i>MAL2</i>      | 0.69 | 0.00 | 0.00 | 0.40 | 0.01 | 14 | AT2 Epithelial Cells |
| <i>MT-CO3</i>    | 0.69 | 0.00 | 0.00 | 1.00 | 0.99 | 14 | AT2 Epithelial Cells |
| <i>FLRT3</i>     | 0.69 | 0.00 | 0.00 | 0.39 | 0.01 | 14 | AT2 Epithelial Cells |
| <i>ANOS1</i>     | 0.69 | 0.00 | 0.00 | 0.26 | 0.02 | 14 | AT2 Epithelial Cells |
| <i>GLS</i>       | 0.69 | 0.00 | 0.00 | 0.42 | 0.10 | 14 | AT2 Epithelial Cells |
| <i>MT-CO2</i>    | 0.69 | 0.00 | 0.00 | 1.00 | 0.99 | 14 | AT2 Epithelial Cells |
| <i>CKB</i>       | 0.69 | 0.00 | 0.00 | 0.69 | 0.22 | 14 | AT2 Epithelial Cells |
| <i>SECISBP2L</i> | 0.69 | 0.00 | 0.00 | 0.47 | 0.11 | 14 | AT2 Epithelial Cells |
| <i>MAGI3</i>     | 0.68 | 0.00 | 0.00 | 0.36 | 0.03 | 14 | AT2 Epithelial Cells |
| <i>MT-ND1</i>    | 0.68 | 0.00 | 0.00 | 0.99 | 0.97 | 14 | AT2 Epithelial Cells |
| <i>LAMC2</i>     | 0.68 | 0.00 | 0.00 | 0.28 | 0.01 | 14 | AT2 Epithelial Cells |
| <i>UTRN</i>      | 0.68 | 0.00 | 0.00 | 0.47 | 0.18 | 14 | AT2 Epithelial Cells |
| <i>GOLGA8B</i>   | 0.67 | 0.00 | 0.00 | 0.33 | 0.04 | 14 | AT2 Epithelial Cells |
| <i>MT-ND4</i>    | 0.67 | 0.00 | 0.00 | 1.00 | 1.00 | 14 | AT2 Epithelial Cells |
| <i>MT-CO1</i>    | 0.67 | 0.00 | 0.00 | 0.99 | 1.00 | 14 | AT2 Epithelial Cells |
| <i>TKT</i>       | 0.66 | 0.00 | 0.00 | 0.64 | 0.26 | 14 | AT2 Epithelial Cells |
| <i>STARD10</i>   | 0.66 | 0.00 | 0.00 | 0.47 | 0.07 | 14 | AT2 Epithelial Cells |
| <i>HSPG2</i>     | 0.66 | 0.00 | 0.00 | 0.47 | 0.19 | 14 | AT2 Epithelial Cells |
| <i>EPB41L5</i>   | 0.65 | 0.00 | 0.00 | 0.30 | 0.03 | 14 | AT2 Epithelial Cells |
| <i>TMEM63B</i>   | 0.65 | 0.00 | 0.00 | 0.36 | 0.03 | 14 | AT2 Epithelial Cells |
| <i>YPEL3</i>     | 0.65 | 0.00 | 0.00 | 0.53 | 0.18 | 14 | AT2 Epithelial Cells |
| <i>CD24</i>      | 0.65 | 0.00 | 0.00 | 0.35 | 0.02 | 14 | AT2 Epithelial Cells |
| <i>TMC5</i>      | 0.65 | 0.00 | 0.00 | 0.40 | 0.01 | 14 | AT2 Epithelial Cells |

|                      |      |      |      |      |      |    |                      |
|----------------------|------|------|------|------|------|----|----------------------|
| <i>OCLN</i>          | 0.64 | 0.00 | 0.00 | 0.45 | 0.07 | 14 | AT2 Epithelial Cells |
| <i>AGPAT2</i>        | 0.64 | 0.00 | 0.00 | 0.50 | 0.13 | 14 | AT2 Epithelial Cells |
| <i>MT-CYB</i>        | 0.63 | 0.00 | 0.00 | 0.99 | 0.99 | 14 | AT2 Epithelial Cells |
| <i>MTATP6P1</i>      | 0.63 | 0.00 | 0.00 | 1.00 | 0.98 | 14 | AT2 Epithelial Cells |
| <i>ST3GAL5</i>       | 0.63 | 0.00 | 0.00 | 0.30 | 0.02 | 14 | AT2 Epithelial Cells |
| <i>C16orf89</i>      | 0.62 | 0.00 | 0.00 | 0.27 | 0.05 | 14 | AT2 Epithelial Cells |
| <i>HPCAL1</i>        | 0.62 | 0.00 | 0.00 | 0.50 | 0.16 | 14 | AT2 Epithelial Cells |
| <i>PPL</i>           | 0.62 | 0.00 | 0.00 | 0.33 | 0.01 | 14 | AT2 Epithelial Cells |
| <i>FOXA2</i>         | 0.62 | 0.00 | 0.00 | 0.26 | 0.00 | 14 | AT2 Epithelial Cells |
| <i>IRX3</i>          | 0.62 | 0.00 | 0.00 | 0.31 | 0.01 | 14 | AT2 Epithelial Cells |
| <i>AGRN</i>          | 0.62 | 0.00 | 0.00 | 0.35 | 0.07 | 14 | AT2 Epithelial Cells |
| <i>LPCAT1</i>        | 0.62 | 0.00 | 0.00 | 0.41 | 0.06 | 14 | AT2 Epithelial Cells |
| <i>BAIAP2</i>        | 0.61 | 0.00 | 0.00 | 0.41 | 0.08 | 14 | AT2 Epithelial Cells |
| <i>S100A6</i>        | 0.61 | 0.00 | 0.00 | 1.00 | 0.84 | 14 | AT2 Epithelial Cells |
| <i>RIN2</i>          | 0.61 | 0.00 | 0.00 | 0.35 | 0.12 | 14 | AT2 Epithelial Cells |
| <i>MT-ND2</i>        | 0.61 | 0.00 | 0.00 | 1.00 | 0.99 | 14 | AT2 Epithelial Cells |
| <i>KCNJ15</i>        | 0.6  | 0.00 | 0.00 | 0.32 | 0.01 | 14 | AT2 Epithelial Cells |
| <i>PATJ</i>          | 0.6  | 0.00 | 0.00 | 0.30 | 0.02 | 14 | AT2 Epithelial Cells |
| <i>SHROOM3</i>       | 0.6  | 0.00 | 0.00 | 0.33 | 0.02 | 14 | AT2 Epithelial Cells |
| <i>UNC13D</i>        | 0.6  | 0.00 | 0.00 | 0.27 | 0.03 | 14 | AT2 Epithelial Cells |
| <i>AKR1C1</i>        | 0.6  | 0.00 | 0.00 | 0.27 | 0.01 | 14 | AT2 Epithelial Cells |
| <i>NCOA7</i>         | 0.59 | 0.00 | 0.00 | 0.35 | 0.03 | 14 | AT2 Epithelial Cells |
| <i>SESN1</i>         | 0.59 | 0.00 | 0.00 | 0.32 | 0.08 | 14 | AT2 Epithelial Cells |
| <i>ERRFI1</i>        | 0.59 | 0.00 | 0.00 | 0.32 | 0.04 | 14 | AT2 Epithelial Cells |
| <i>F11R</i>          | 0.59 | 0.00 | 0.00 | 0.40 | 0.07 | 14 | AT2 Epithelial Cells |
| <i>NHSL1</i>         | 0.58 | 0.00 | 0.00 | 0.31 | 0.04 | 14 | AT2 Epithelial Cells |
| <i>NEDD4L</i>        | 0.58 | 0.00 | 0.00 | 0.45 | 0.06 | 14 | AT2 Epithelial Cells |
| <i>WWC2</i>          | 0.58 | 0.00 | 0.00 | 0.30 | 0.06 | 14 | AT2 Epithelial Cells |
| <i>PRDX1</i>         | 0.58 | 0.00 | 0.00 | 0.87 | 0.66 | 14 | AT2 Epithelial Cells |
| <i>ORMDL1</i>        | 0.58 | 0.00 | 0.01 | 0.45 | 0.23 | 14 | AT2 Epithelial Cells |
| <i>PDGFA</i>         | 0.57 | 0.00 | 0.00 | 0.33 | 0.06 | 14 | AT2 Epithelial Cells |
| <i>PCYOX1</i>        | 0.57 | 0.00 | 0.00 | 0.39 | 0.10 | 14 | AT2 Epithelial Cells |
| <i>SLC2A3</i>        | 0.57 | 0.00 | 0.00 | 0.42 | 0.18 | 14 | AT2 Epithelial Cells |
| <i>PPP1R14C</i>      | 0.57 | 0.00 | 0.00 | 0.31 | 0.01 | 14 | AT2 Epithelial Cells |
| <i>NECAB3</i>        | 0.56 | 0.00 | 0.00 | 0.30 | 0.03 | 14 | AT2 Epithelial Cells |
| <i>MT-ATP6</i>       | 0.55 | 0.00 | 0.00 | 1.00 | 0.99 | 14 | AT2 Epithelial Cells |
| <i>RP11-357D18.1</i> | 0.55 | 0.00 | 0.00 | 0.26 | 0.00 | 14 | AT2 Epithelial Cells |
| <i>GOLGA8A</i>       | 0.54 | 0.00 | 0.00 | 0.32 | 0.07 | 14 | AT2 Epithelial Cells |
| <i>MMP28</i>         | 0.54 | 0.00 | 0.00 | 0.26 | 0.02 | 14 | AT2 Epithelial Cells |
| <i>NSG1</i>          | 0.54 | 0.00 | 0.00 | 0.31 | 0.01 | 14 | AT2 Epithelial Cells |
| <i>PLLP</i>          | 0.54 | 0.00 | 0.00 | 0.27 | 0.03 | 14 | AT2 Epithelial Cells |
| <i>KLHL24</i>        | 0.54 | 0.00 | 0.00 | 0.36 | 0.10 | 14 | AT2 Epithelial Cells |

|                        |      |      |      |      |      |    |                      |
|------------------------|------|------|------|------|------|----|----------------------|
| <i>FAM20A</i>          | 0.54 | 0.00 | 0.00 | 0.27 | 0.02 | 14 | AT2 Epithelial Cells |
| <i>CCDC12</i>          | 0.54 | 0.00 | 0.00 | 0.56 | 0.28 | 14 | AT2 Epithelial Cells |
| <i>POLR2L</i>          | 0.53 | 0.00 | 0.00 | 0.89 | 0.67 | 14 | AT2 Epithelial Cells |
| <i>LGALS3BP</i>        | 0.53 | 0.00 | 0.00 | 0.50 | 0.20 | 14 | AT2 Epithelial Cells |
| <i>COX7C</i>           | 0.53 | 0.00 | 0.00 | 0.97 | 0.87 | 14 | AT2 Epithelial Cells |
| <i>ABLM1</i>           | 0.53 | 0.00 | 0.00 | 0.32 | 0.07 | 14 | AT2 Epithelial Cells |
| <i>MRPS36</i>          | 0.52 | 0.00 | 0.00 | 0.51 | 0.25 | 14 | AT2 Epithelial Cells |
| <i>RHOF</i>            | 0.52 | 0.00 | 0.00 | 0.36 | 0.06 | 14 | AT2 Epithelial Cells |
| <i>ITGB6</i>           | 0.52 | 0.00 | 0.00 | 0.27 | 0.01 | 14 | AT2 Epithelial Cells |
| <i>TUBA1C</i>          | 0.52 | 0.00 | 0.00 | 0.40 | 0.14 | 14 | AT2 Epithelial Cells |
| <i>P3H2</i>            | 0.52 | 0.00 | 0.00 | 0.33 | 0.03 | 14 | AT2 Epithelial Cells |
| <i>ATP8A1</i>          | 0.51 | 0.00 | 0.00 | 0.28 | 0.02 | 14 | AT2 Epithelial Cells |
| <i>LRRFIP1</i>         | 0.51 | 0.00 | 0.00 | 0.59 | 0.27 | 14 | AT2 Epithelial Cells |
| <i>MISP</i>            | 0.51 | 0.00 | 0.00 | 0.28 | 0.00 | 14 | AT2 Epithelial Cells |
| <i>HMGA1</i>           | 0.51 | 0.00 | 0.00 | 0.45 | 0.10 | 14 | AT2 Epithelial Cells |
| <i>ST6GALNAC<br/>5</i> | 0.51 | 0.00 | 0.00 | 0.26 | 0.01 | 14 | AT2 Epithelial Cells |
| <i>SOX11</i>           | 0.5  | 0.00 | 0.00 | 0.35 | 0.10 | 14 | AT2 Epithelial Cells |
| <i>CMTM8</i>           | 0.5  | 0.00 | 0.00 | 0.40 | 0.06 | 14 | AT2 Epithelial Cells |
| <i>RBM47</i>           | 0.5  | 0.00 | 0.00 | 0.33 | 0.03 | 14 | AT2 Epithelial Cells |
| <i>SPRYD7</i>          | 0.49 | 0.00 | 0.00 | 0.27 | 0.07 | 14 | AT2 Epithelial Cells |
| <i>MT-ND5</i>          | 0.49 | 0.00 | 0.01 | 0.96 | 0.89 | 14 | AT2 Epithelial Cells |
| <i>INTS6</i>           | 0.49 | 0.00 | 0.00 | 0.47 | 0.20 | 14 | AT2 Epithelial Cells |
| <i>PCBD1</i>           | 0.49 | 0.00 | 0.00 | 0.51 | 0.21 | 14 | AT2 Epithelial Cells |
| <i>ERBB2</i>           | 0.49 | 0.00 | 0.00 | 0.36 | 0.09 | 14 | AT2 Epithelial Cells |
| <i>DDAH1</i>           | 0.48 | 0.00 | 0.00 | 0.36 | 0.03 | 14 | AT2 Epithelial Cells |
| <i>DHCR24</i>          | 0.48 | 0.00 | 0.00 | 0.31 | 0.01 | 14 | AT2 Epithelial Cells |
| <i>NFKBIZ</i>          | 0.48 | 0.00 | 0.00 | 0.28 | 0.08 | 14 | AT2 Epithelial Cells |
| <i>CEBPD</i>           | 0.48 | 0.00 | 0.00 | 0.58 | 0.30 | 14 | AT2 Epithelial Cells |
| <i>CRB3</i>            | 0.48 | 0.00 | 0.00 | 0.26 | 0.00 | 14 | AT2 Epithelial Cells |
| <i>PDXK</i>            | 0.48 | 0.00 | 0.00 | 0.33 | 0.08 | 14 | AT2 Epithelial Cells |
| <i>ANXA1</i>           | 0.47 | 0.00 | 0.00 | 0.74 | 0.40 | 14 | AT2 Epithelial Cells |
| <i>TUBB4B</i>          | 0.47 | 0.00 | 0.00 | 0.71 | 0.40 | 14 | AT2 Epithelial Cells |
| <i>CAT</i>             | 0.47 | 0.00 | 0.00 | 0.53 | 0.25 | 14 | AT2 Epithelial Cells |
| <i>DSP</i>             | 0.47 | 0.00 | 0.00 | 0.33 | 0.02 | 14 | AT2 Epithelial Cells |
| <i>CTSD</i>            | 0.47 | 0.00 | 0.00 | 0.68 | 0.31 | 14 | AT2 Epithelial Cells |
| <i>TMEM87A</i>         | 0.46 | 0.00 | 0.00 | 0.47 | 0.22 | 14 | AT2 Epithelial Cells |
| <i>GNG5</i>            | 0.46 | 0.00 | 0.00 | 0.77 | 0.53 | 14 | AT2 Epithelial Cells |
| <i>PON2</i>            | 0.46 | 0.00 | 0.00 | 0.58 | 0.24 | 14 | AT2 Epithelial Cells |
| <i>GADD45B</i>         | 0.46 | 0.00 | 0.00 | 0.73 | 0.42 | 14 | AT2 Epithelial Cells |
| <i>CXCL16</i>          | 0.46 | 0.00 | 0.00 | 0.40 | 0.08 | 14 | AT2 Epithelial Cells |
| <i>HSBP1L1</i>         | 0.46 | 0.00 | 0.00 | 0.36 | 0.04 | 14 | AT2 Epithelial Cells |
| <i>ARL4C</i>           | 0.45 | 0.00 | 0.00 | 0.36 | 0.07 | 14 | AT2 Epithelial Cells |

|                      |      |      |      |      |      |    |                      |
|----------------------|------|------|------|------|------|----|----------------------|
| <i>BTG3</i>          | 0.45 | 0.00 | 0.00 | 0.53 | 0.24 | 14 | AT2 Epithelial Cells |
| <i>BLVRB</i>         | 0.45 | 0.00 | 0.00 | 0.51 | 0.21 | 14 | AT2 Epithelial Cells |
| <i>TMEM30B</i>       | 0.45 | 0.00 | 0.00 | 0.28 | 0.01 | 14 | AT2 Epithelial Cells |
| <i>TJP2</i>          | 0.45 | 0.00 | 0.00 | 0.32 | 0.11 | 14 | AT2 Epithelial Cells |
| <i>ISOC1</i>         | 0.45 | 0.00 | 0.00 | 0.33 | 0.09 | 14 | AT2 Epithelial Cells |
| <i>MYO9A</i>         | 0.45 | 0.00 | 0.00 | 0.32 | 0.10 | 14 | AT2 Epithelial Cells |
| <i>ADK</i>           | 0.44 | 0.00 | 0.00 | 0.39 | 0.08 | 14 | AT2 Epithelial Cells |
| <i>SLC7A8</i>        | 0.44 | 0.00 | 0.00 | 0.26 | 0.03 | 14 | AT2 Epithelial Cells |
| <i>HEXIM1</i>        | 0.44 | 0.00 | 0.03 | 0.50 | 0.26 | 14 | AT2 Epithelial Cells |
| <i>CTNNBIP1</i>      | 0.44 | 0.00 | 0.00 | 0.41 | 0.11 | 14 | AT2 Epithelial Cells |
| <i>PLXNB2</i>        | 0.43 | 0.00 | 0.00 | 0.36 | 0.12 | 14 | AT2 Epithelial Cells |
| <i>DDR1</i>          | 0.43 | 0.00 | 0.00 | 0.32 | 0.04 | 14 | AT2 Epithelial Cells |
| <i>GRAMD1A</i>       | 0.43 | 0.00 | 0.00 | 0.45 | 0.14 | 14 | AT2 Epithelial Cells |
| <i>SH3YL1</i>        | 0.43 | 0.00 | 0.00 | 0.32 | 0.09 | 14 | AT2 Epithelial Cells |
| <i>CCND3</i>         | 0.43 | 0.00 | 0.00 | 0.44 | 0.15 | 14 | AT2 Epithelial Cells |
| <i>SNHG16</i>        | 0.43 | 0.00 | 0.00 | 0.50 | 0.23 | 14 | AT2 Epithelial Cells |
| <i>BEX2</i>          | 0.43 | 0.00 | 0.00 | 0.26 | 0.03 | 14 | AT2 Epithelial Cells |
| <i>SSR2</i>          | 0.42 | 0.00 | 0.01 | 0.86 | 0.72 | 14 | AT2 Epithelial Cells |
| <i>LPCAT3</i>        | 0.42 | 0.00 | 0.00 | 0.35 | 0.10 | 14 | AT2 Epithelial Cells |
| <i>JUP</i>           | 0.42 | 0.00 | 0.00 | 0.41 | 0.17 | 14 | AT2 Epithelial Cells |
| <i>LRBA</i>          | 0.42 | 0.00 | 0.00 | 0.31 | 0.07 | 14 | AT2 Epithelial Cells |
| <i>RPL39P3</i>       | 0.41 | 0.00 | 0.00 | 0.62 | 0.34 | 14 | AT2 Epithelial Cells |
| <i>MSMO1</i>         | 0.41 | 0.00 | 0.00 | 0.30 | 0.08 | 14 | AT2 Epithelial Cells |
| <i>STT3B</i>         | 0.41 | 0.00 | 0.00 | 0.46 | 0.18 | 14 | AT2 Epithelial Cells |
| <i>TSPO</i>          | 0.41 | 0.00 | 0.00 | 0.76 | 0.43 | 14 | AT2 Epithelial Cells |
| <i>SCD5</i>          | 0.41 | 0.00 | 0.00 | 0.30 | 0.08 | 14 | AT2 Epithelial Cells |
| <i>ADIPOR1</i>       | 0.41 | 0.00 | 0.00 | 0.42 | 0.17 | 14 | AT2 Epithelial Cells |
| <i>RBPMS</i>         | 0.41 | 0.00 | 0.00 | 0.47 | 0.20 | 14 | AT2 Epithelial Cells |
| <i>TXNDC17</i>       | 0.41 | 0.00 | 0.00 | 0.54 | 0.27 | 14 | AT2 Epithelial Cells |
| <i>B4GALT1</i>       | 0.41 | 0.00 | 0.00 | 0.32 | 0.11 | 14 | AT2 Epithelial Cells |
| <i>RP11-532F12.5</i> | 0.41 | 0.00 | 0.00 | 0.26 | 0.01 | 14 | AT2 Epithelial Cells |
| <i>HMGN3</i>         | 0.41 | 0.00 | 0.02 | 0.71 | 0.49 | 14 | AT2 Epithelial Cells |
| <i>MAPK13</i>        | 0.4  | 0.00 | 0.00 | 0.27 | 0.02 | 14 | AT2 Epithelial Cells |
| <i>DYNLT1</i>        | 0.4  | 0.00 | 0.01 | 0.67 | 0.43 | 14 | AT2 Epithelial Cells |
| <i>CNDP2</i>         | 0.4  | 0.00 | 0.00 | 0.39 | 0.13 | 14 | AT2 Epithelial Cells |
| <i>VWA1</i>          | 0.4  | 0.00 | 0.00 | 0.32 | 0.10 | 14 | AT2 Epithelial Cells |
| <i>CELF2</i>         | 0.39 | 0.00 | 0.00 | 0.50 | 0.24 | 14 | AT2 Epithelial Cells |
| <i>ICA1</i>          | 0.39 | 0.00 | 0.00 | 0.27 | 0.04 | 14 | AT2 Epithelial Cells |
| <i>HIST1H2AC</i>     | 0.39 | 0.00 | 0.00 | 0.27 | 0.09 | 14 | AT2 Epithelial Cells |
| <i>KCNQ1OT1</i>      | 0.39 | 0.00 | 0.03 | 0.59 | 0.31 | 14 | AT2 Epithelial Cells |
| <i>ALDH3A2</i>       | 0.38 | 0.00 | 0.00 | 0.26 | 0.08 | 14 | AT2 Epithelial Cells |
| <i>RPS20</i>         | 0.38 | 0.00 | 0.00 | 1.00 | 0.97 | 14 | AT2 Epithelial Cells |

|                     |      |      |      |      |      |    |                      |
|---------------------|------|------|------|------|------|----|----------------------|
| <i>SNHG3</i>        | 0.38 | 0.00 | 0.00 | 0.35 | 0.13 | 14 | AT2 Epithelial Cells |
| <i>ADGRF5</i>       | 0.38 | 0.00 | 0.00 | 0.46 | 0.17 | 14 | AT2 Epithelial Cells |
| <i>TOR1AIP2</i>     | 0.37 | 0.00 | 0.00 | 0.41 | 0.15 | 14 | AT2 Epithelial Cells |
| <i>OCIAD2</i>       | 0.37 | 0.00 | 0.00 | 0.42 | 0.14 | 14 | AT2 Epithelial Cells |
| <i>HOOK2</i>        | 0.36 | 0.00 | 0.00 | 0.39 | 0.12 | 14 | AT2 Epithelial Cells |
| <i>C11orf1</i>      | 0.36 | 0.00 | 0.00 | 0.26 | 0.06 | 14 | AT2 Epithelial Cells |
| <i>PTRHD1</i>       | 0.36 | 0.00 | 0.00 | 0.49 | 0.18 | 14 | AT2 Epithelial Cells |
| <i>RPL39</i>        | 0.36 | 0.00 | 0.00 | 0.99 | 0.99 | 14 | AT2 Epithelial Cells |
| <i>MYO6</i>         | 0.36 | 0.00 | 0.00 | 0.44 | 0.14 | 14 | AT2 Epithelial Cells |
| <i>ANXA2P2</i>      | 0.35 | 0.00 | 0.00 | 0.30 | 0.09 | 14 | AT2 Epithelial Cells |
| <i>FBNP1L</i>       | 0.35 | 0.00 | 0.02 | 0.26 | 0.10 | 14 | AT2 Epithelial Cells |
| <i>WBP2</i>         | 0.35 | 0.00 | 0.01 | 0.41 | 0.18 | 14 | AT2 Epithelial Cells |
| <i>TMC4</i>         | 0.35 | 0.00 | 0.00 | 0.28 | 0.01 | 14 | AT2 Epithelial Cells |
| <i>PLEKHJ1</i>      | 0.34 | 0.00 | 0.05 | 0.40 | 0.19 | 14 | AT2 Epithelial Cells |
| <i>RPL37</i>        | 0.34 | 0.00 | 0.00 | 1.00 | 0.98 | 14 | AT2 Epithelial Cells |
| <i>AK1</i>          | 0.34 | 0.00 | 0.00 | 0.42 | 0.17 | 14 | AT2 Epithelial Cells |
| <i>RAB5B</i>        | 0.34 | 0.00 | 0.00 | 0.39 | 0.14 | 14 | AT2 Epithelial Cells |
| <i>PRKCI</i>        | 0.34 | 0.00 | 0.00 | 0.32 | 0.06 | 14 | AT2 Epithelial Cells |
| <i>FARP1</i>        | 0.34 | 0.00 | 0.00 | 0.36 | 0.13 | 14 | AT2 Epithelial Cells |
| <i>ZDHHC12</i>      | 0.34 | 0.00 | 0.00 | 0.26 | 0.06 | 14 | AT2 Epithelial Cells |
| <i>TNFRSF12A</i>    | 0.34 | 0.00 | 0.00 | 0.42 | 0.17 | 14 | AT2 Epithelial Cells |
| <i>LIMCH1</i>       | 0.34 | 0.00 | 0.00 | 0.50 | 0.21 | 14 | AT2 Epithelial Cells |
| <i>HMGN1</i>        | 0.33 | 0.00 | 0.03 | 0.86 | 0.61 | 14 | AT2 Epithelial Cells |
| <i>TES</i>          | 0.33 | 0.00 | 0.00 | 0.27 | 0.09 | 14 | AT2 Epithelial Cells |
| <i>CPAMD8</i>       | 0.33 | 0.00 | 0.00 | 0.27 | 0.04 | 14 | AT2 Epithelial Cells |
| <i>PBX2</i>         | 0.33 | 0.00 | 0.04 | 0.27 | 0.10 | 14 | AT2 Epithelial Cells |
| <i>C2orf68</i>      | 0.32 | 0.00 | 0.01 | 0.32 | 0.12 | 14 | AT2 Epithelial Cells |
| <i>RPL31P49</i>     | 0.32 | 0.00 | 0.04 | 0.26 | 0.10 | 14 | AT2 Epithelial Cells |
| <i>RP1-34B20.21</i> | 0.32 | 0.00 | 0.00 | 0.30 | 0.07 | 14 | AT2 Epithelial Cells |
| <i>SMC4</i>         | 0.32 | 0.00 | 0.00 | 0.31 | 0.11 | 14 | AT2 Epithelial Cells |
| <i>C14orf1</i>      | 0.32 | 0.00 | 0.01 | 0.39 | 0.17 | 14 | AT2 Epithelial Cells |
| <i>RAB27A</i>       | 0.31 | 0.00 | 0.00 | 0.30 | 0.10 | 14 | AT2 Epithelial Cells |
| <i>AHR</i>          | 0.31 | 0.00 | 0.00 | 0.36 | 0.12 | 14 | AT2 Epithelial Cells |
| <i>ODC1</i>         | 0.31 | 0.00 | 0.03 | 0.26 | 0.10 | 14 | AT2 Epithelial Cells |
| <i>RPL37A</i>       | 0.31 | 0.00 | 0.00 | 1.00 | 0.99 | 14 | AT2 Epithelial Cells |
| <i>RPL28</i>        | 0.3  | 0.00 | 0.00 | 1.00 | 0.98 | 14 | AT2 Epithelial Cells |
| <i>SYNGR2</i>       | 0.3  | 0.00 | 0.00 | 0.56 | 0.27 | 14 | AT2 Epithelial Cells |
| <i>PIAS1</i>        | 0.29 | 0.00 | 0.01 | 0.32 | 0.12 | 14 | AT2 Epithelial Cells |
| <i>TPD52</i>        | 0.29 | 0.00 | 0.00 | 0.26 | 0.04 | 14 | AT2 Epithelial Cells |
| <i>PARP14</i>       | 0.29 | 0.00 | 0.01 | 0.30 | 0.11 | 14 | AT2 Epithelial Cells |
| <i>RPS19</i>        | 0.29 | 0.00 | 0.00 | 1.00 | 0.99 | 14 | AT2 Epithelial Cells |
| <i>PACSLIN3</i>     | 0.29 | 0.00 | 0.01 | 0.28 | 0.10 | 14 | AT2 Epithelial Cells |

|               |      |      |      |      |      |    |                      |
|---------------|------|------|------|------|------|----|----------------------|
| <i>NDRG1</i>  | 0.28 | 0.00 | 0.03 | 0.39 | 0.17 | 14 | AT2 Epithelial Cells |
| <i>RPL24</i>  | 0.28 | 0.00 | 0.00 | 1.00 | 0.97 | 14 | AT2 Epithelial Cells |
| <i>NUDT14</i> | 0.28 | 0.00 | 0.00 | 0.30 | 0.09 | 14 | AT2 Epithelial Cells |
| <i>WDR34</i>  | 0.26 | 0.00 | 0.01 | 0.28 | 0.10 | 14 | AT2 Epithelial Cells |
| <i>UBL3</i>   | 0.26 | 0.00 | 0.00 | 0.33 | 0.13 | 14 | AT2 Epithelial Cells |
| <i>PTPN1</i>  | 0.26 | 0.00 | 0.00 | 0.26 | 0.07 | 14 | AT2 Epithelial Cells |
| <i>USF2</i>   | 0.25 | 0.00 | 0.00 | 0.33 | 0.12 | 14 | AT2 Epithelial Cells |

---

Table S3: Distribution of mouse cells across age

| Cluster | Cell Type   | Cellular Subtype   | PND1 | PND10 | PND3 | PND7 | Total |
|---------|-------------|--------------------|------|-------|------|------|-------|
| 0       | Endothelial | Endothelial        | 603  | 1652  | 1056 | 724  | 4035  |
| 7       | Endothelial | Endothelial        | 27   | 650   | 473  | 126  | 1276  |
| 8       | Endothelial | Endothelial        | 1234 | 1     | 8    | 1    | 1244  |
| 14      | Endothelial | Endothelial        | 56   | 534   | 213  | 299  | 1102  |
| 16      | Endothelial | Endothelial        | 150  | 233   | 224  | 139  | 746   |
| 19      | Endothelial | Endothelial        | 101  | 108   | 111  | 168  | 488   |
| 3       | Epithelial  | AT2 Cells          | 178  | 1046  | 990  | 274  | 2488  |
| 9       | Epithelial  | AT2 Cells          | 1080 | 36    | 106  | 18   | 1240  |
| 10      | Epithelial  | AT1 Cells          | 435  | 117   | 663  | 17   | 1232  |
| 17      | Epithelial  | Ciliated Cells     | 92   | 235   | 351  | 8    | 686   |
| 27      | Epithelial  | Mixed Epithelial   | 39   | 109   | 70   | 7    | 225   |
| 29      | Epithelial  | AT2 Cells          | 9    | 93    | 14   | 66   | 182   |
| 31      | Epithelial  | AT2 Cells          | 17   | 27    | 13   | 23   | 80    |
| 4       | Immune      | Monocytes          | 101  | 331   | 465  | 897  | 1794  |
| 5       | Immune      | B-Cells            | 62   | 904   | 262  | 292  | 1520  |
| 6       | Immune      | T-Cells            | 38   | 743   | 275  | 367  | 1520  |
| 12      | Immune      | Macrophages        | 292  | 59    | 606  | 177  | 1134  |
| 21      | Immune      | Macrophages        | 72   | 125   | 117  | 107  | 421   |
| 22      | Immune      | Neutrophils        | 121  | 17    | 194  | 57   | 389   |
| 25      | Immune      | T-Cells            | 1    | 108   | 102  | 52   | 263   |
| 28      | Immune      | Myeloid Cells      | 18   | 37    | 75   | 73   | 203   |
| 1       | Mesenchymal | Fibroblasts        | 21   | 1075  | 765  | 984  | 2845  |
| 2       | Mesenchymal | Stromal Cells      | 113  | 1289  | 285  | 840  | 2527  |
| 11      | Mesenchymal | Matrix Fibroblasts | 1216 | 0     | 1    | 0    | 1217  |
| 13      | Mesenchymal | Matrix Fibroblasts | 238  | 347   | 341  | 181  | 1107  |
| 15      | Mesenchymal | Matrix Fibroblasts | 905  | 0     | 36   | 2    | 943   |
| 18      | Mesenchymal | Matrix Fibroblasts | 256  | 170   | 94   | 159  | 679   |
| 20      | Mesenchymal | Matrix Fibroblasts | 463  | 0     | 1    | 0    | 464   |
| 23      | Mesenchymal | Matrix Fibroblasts | 15   | 73    | 113  | 83   | 284   |
| 24      | Mesenchymal | Matrix Fibroblasts | 1    | 116   | 13   | 144  | 274   |
| 26      | Mesenchymal | Fibroblasts        | 6    | 168   | 41   | 24   | 239   |
| 30      | Mesenchymal | Myo-fibroblasts    | 43   | 29    | 12   | 15   | 99    |
| Total   |             |                    | 8003 | 10432 | 8090 | 6324 | 32946 |

Table S4: Distribution of human and mouse cells by sample source and capture

| Major Type   | Subclass           | Lung1 Lung1 Lung2 Lung2 |      |      |      |      | Human | PND PND PND PND |      |      |      |       | Total |
|--------------|--------------------|-------------------------|------|------|------|------|-------|-----------------|------|------|------|-------|-------|
|              |                    | Cluster                 | Run1 | Run2 | Run1 | Run2 |       | 1               | 3    | 7    | 10   | Mouse |       |
| Endothelial  | Endothelial        | 0                       | 47   | 29   | 20   | 49   | 145   | 1446            | 1094 | 771  | 1685 | 4996  | 5141  |
| Endothelial  | Endothelial        | 5                       | 75   | 59   | 70   | 91   | 295   | 349             | 496  | 178  | 716  | 1739  | 2034  |
| Endothelial  | Endothelial        | 9                       | 31   | 41   | 24   | 24   | 120   | 182             | 270  | 151  | 313  | 916   | 1036  |
| Endothelial  | Endothelial        | 15                      | 0    | 1    | 29   | 51   | 81    | 0               | 0    | 0    | 0    | 0     | 81    |
| Mesenchymal  | Matrix Fibroblasts | 1                       | 61   | 41   | 41   | 11   | 154   | 1295            | 842  | 965  | 1074 | 4176  | 4330  |
| Mesenchymal  | Matrix Fibroblasts | 14                      | 121  | 48   | 130  | 98   | 397   | 2               | 5    | 7    | 2    | 16    | 413   |
| Mesenchymal  | Myo-fibroblasts    | 3                       | 192  | 90   | 36   | 81   | 399   | 249             | 308  | 846  | 1276 | 2679  | 3078  |
| Mesenchymal  | Myo-fibroblasts    | 10                      | 86   | 74   | 4    | 8    | 172   | 169             | 195  | 152  | 69   | 585   | 757   |
| Mesenchymal  | Myo-fibroblasts    | 11                      | 39   | 40   | 80   | 29   | 188   | 102             | 153  | 28   | 286  | 569   | 757   |
| Mesenchymal  | Pericytes          | 12                      | 45   | 43   | 40   | 38   | 166   | 196             | 59   | 124  | 100  | 479   | 645   |
| Epithelial   | AT1 Cells          | 6                       | 1    | 8    | 0    | 1    | 10    | 790             | 707  | 22   | 140  | 1659  | 1669  |
| Epithelial   | AT2 Cells          | 2                       | 4    | 7    | 2    | 1    | 14    | 833             | 1102 | 331  | 1197 | 3463  | 3477  |
| Immune Cells | Macrophages        | 4                       | 60   | 36   | 6    | 4    | 106   | 413             | 1128 | 1012 | 343  | 2896  | 3002  |
| Immune Cells | B Cells            | 7                       | 10   | 3    | 6    | 4    | 23    | 49              | 242  | 253  | 821  | 1365  | 1388  |
| Immune Cells | CD4 T Cells        | 8                       | 0    | 0    | 16   | 3    | 19    | 31              | 292  | 335  | 653  | 1311  | 1330  |
| Immune Cells | Myeloid Cells      | 13                      | 1    | 0    | 0    | 0    | 1     | 56              | 140  | 215  | 174  | 585   | 586   |
| Immune Cells | NK Cells           | 16                      | 28   | 9    | 0    | 0    | 37    | 0               | 0    | 1    | 0    | 1     | 38    |

Table S5: Principal components (PCs) and associated statistics involved with age estimation of human cells

| Cell Type          | Principal Component (PC) Associated with Age | % variance | Absolute Correlation with Age (r) |
|--------------------|----------------------------------------------|------------|-----------------------------------|
| Endothelial Cells  | 3                                            | 12         | 0.46                              |
| Myo-fibroblasts    | 8                                            | 1          | 0.41                              |
| Matrix Fibroblasts | 2                                            | 22         | 0.62                              |
| Macrophages        | 2                                            | 27         | 0.41                              |
| B-Cells            | 8                                            | 2          | 0.31                              |
| CD4 T-Cells        | 7                                            | 2          | 0.12                              |
| Epithelial Cells   | 3                                            | 14         | 0.42                              |

Table S6: Sample Characteristics

| Donor | GAB<br>(Weeks) | Age at<br>donation | Gender | scSeq | Flow<br>Cytometry | FISH |
|-------|----------------|--------------------|--------|-------|-------------------|------|
| D038  | 38             | 1 Day              | F      | Y     | Y                 |      |
| D051  | 31             | 1 Day              | F      | Y     | Y                 |      |
| D019  | 39             | 1 Day              | M      |       | Y                 |      |
| D109  | 41             | 1 Day              | F      |       |                   | Y    |
| D005  | 39             | 1 Day              | M      |       | Y                 | Y    |
| D102  | 37             | 1 Day              | M      |       |                   | Y    |

Table S7: Marker genes for individual clusters of cells from mouse cells

| Genes    | Average<br>Log<br>Fold<br>Change | Unadjusted<br>P-value | Adjusted<br>P-Value | Proportion<br>of cells in<br>Group 1 | Proportion<br>of cells in<br>Group 2 | Cluster<br>No | Sub-Type    |
|----------|----------------------------------|-----------------------|---------------------|--------------------------------------|--------------------------------------|---------------|-------------|
| Hpgd     | 1.84                             | 0.00                  | 0.00                | 0.75                                 | 0.19                                 | 0             | Endothelial |
| Scn7a    | 1.75                             | 0.00                  | 0.00                | 0.88                                 | 0.22                                 | 0             | Endothelial |
| Calcr1   | 1.74                             | 0.00                  | 0.00                | 0.80                                 | 0.18                                 | 0             | Endothelial |
| Cd93     | 1.71                             | 0.00                  | 0.00                | 0.76                                 | 0.15                                 | 0             | Endothelial |
| Gpihbp1  | 1.71                             | 0.00                  | 0.00                | 0.63                                 | 0.10                                 | 0             | Endothelial |
| Tmem100  | 1.70                             | 0.00                  | 0.00                | 0.87                                 | 0.22                                 | 0             | Endothelial |
| Cxcl12   | 1.57                             | 0.00                  | 0.00                | 0.35                                 | 0.09                                 | 0             | Endothelial |
| Cdh5     | 1.56                             | 0.00                  | 0.00                | 0.77                                 | 0.16                                 | 0             | Endothelial |
| Pcdh17   | 1.55                             | 0.00                  | 0.00                | 0.66                                 | 0.15                                 | 0             | Endothelial |
| Ptpnb    | 1.54                             | 0.00                  | 0.00                | 0.71                                 | 0.15                                 | 0             | Endothelial |
| Clec14a  | 1.54                             | 0.00                  | 0.00                | 0.62                                 | 0.12                                 | 0             | Endothelial |
| BC028528 | 1.54                             | 0.00                  | 0.00                | 0.77                                 | 0.23                                 | 0             | Endothelial |
| Egfl7    | 1.47                             | 0.00                  | 0.00                | 0.85                                 | 0.20                                 | 0             | Endothelial |
| Sox17    | 1.45                             | 0.00                  | 0.00                | 0.50                                 | 0.09                                 | 0             | Endothelial |
| Gpr116   | 1.43                             | 0.00                  | 0.00                | 0.87                                 | 0.31                                 | 0             | Endothelial |
| Cypr1    | 1.41                             | 0.00                  | 0.00                | 0.50                                 | 0.10                                 | 0             | Endothelial |
| Epas1    | 1.38                             | 0.00                  | 0.00                | 0.71                                 | 0.19                                 | 0             | Endothelial |
| Pecam1   | 1.37                             | 0.00                  | 0.00                | 0.71                                 | 0.18                                 | 0             | Endothelial |
| Rasgrp3  | 1.35                             | 0.00                  | 0.00                | 0.47                                 | 0.08                                 | 0             | Endothelial |
| Sema3c   | 1.32                             | 0.00                  | 0.00                | 0.50                                 | 0.16                                 | 0             | Endothelial |
| Ldb2     | 1.31                             | 0.00                  | 0.00                | 0.51                                 | 0.12                                 | 0             | Endothelial |
| S100a16  | 1.31                             | 0.00                  | 0.00                | 0.62                                 | 0.19                                 | 0             | Endothelial |
| Tm4sf1   | 1.31                             | 0.00                  | 0.00                | 0.59                                 | 0.16                                 | 0             | Endothelial |
| Tmem2    | 1.31                             | 0.00                  | 0.00                | 0.45                                 | 0.11                                 | 0             | Endothelial |
| Ctla2a   | 1.31                             | 0.00                  | 0.00                | 0.62                                 | 0.15                                 | 0             | Endothelial |
| Tek      | 1.29                             | 0.00                  | 0.00                | 0.44                                 | 0.09                                 | 0             | Endothelial |
| Ramp2    | 1.28                             | 0.00                  | 0.00                | 0.81                                 | 0.21                                 | 0             | Endothelial |
| Plvap    | 1.26                             | 0.00                  | 0.00                | 0.43                                 | 0.09                                 | 0             | Endothelial |
| Cav1     | 1.26                             | 0.00                  | 0.00                | 0.73                                 | 0.26                                 | 0             | Endothelial |
| Cldn5    | 1.26                             | 0.00                  | 0.00                | 0.68                                 | 0.16                                 | 0             | Endothelial |
| Tspan7   | 1.24                             | 0.00                  | 0.00                | 0.61                                 | 0.16                                 | 0             | Endothelial |
| Edn1     | 1.23                             | 0.00                  | 0.00                | 0.33                                 | 0.07                                 | 0             | Endothelial |
| Stmn2    | 1.20                             | 0.00                  | 0.00                | 0.46                                 | 0.11                                 | 0             | Endothelial |
| Clec1a   | 1.20                             | 0.00                  | 0.00                | 0.53                                 | 0.12                                 | 0             | Endothelial |
| Cd36     | 1.19                             | 0.00                  | 0.00                | 0.72                                 | 0.28                                 | 0             | Endothelial |
| Kit      | 1.18                             | 0.00                  | 0.00                | 0.33                                 | 0.05                                 | 0             | Endothelial |
| Efnb2    | 1.18                             | 0.00                  | 0.00                | 0.41                                 | 0.11                                 | 0             | Endothelial |
| Sdpr     | 1.17                             | 0.00                  | 0.00                | 0.89                                 | 0.47                                 | 0             | Endothelial |

|          |      |      |      |      |      |   |             |
|----------|------|------|------|------|------|---|-------------|
| Tspan18  | 1.17 | 0.00 | 0.00 | 0.43 | 0.10 | 0 | Endothelial |
| Fendrr   | 1.17 | 0.00 | 0.00 | 0.52 | 0.16 | 0 | Endothelial |
| Lyve1    | 1.14 | 0.00 | 0.00 | 0.62 | 0.17 | 0 | Endothelial |
| Rasip1   | 1.13 | 0.00 | 0.00 | 0.39 | 0.09 | 0 | Endothelial |
| Ecscr    | 1.13 | 0.00 | 0.00 | 0.52 | 0.12 | 0 | Endothelial |
| Ace      | 1.12 | 0.00 | 0.00 | 0.41 | 0.10 | 0 | Endothelial |
| Rnf144a  | 1.12 | 0.00 | 0.00 | 0.42 | 0.12 | 0 | Endothelial |
| Afap1l1  | 1.12 | 0.00 | 0.00 | 0.46 | 0.14 | 0 | Endothelial |
| Ehd4     | 1.12 | 0.00 | 0.00 | 0.63 | 0.23 | 0 | Endothelial |
| Tspan13  | 1.11 | 0.00 | 0.00 | 0.65 | 0.20 | 0 | Endothelial |
| Gja4     | 1.10 | 0.00 | 0.00 | 0.28 | 0.04 | 0 | Endothelial |
| Palmd    | 1.09 | 0.00 | 0.00 | 0.38 | 0.10 | 0 | Endothelial |
| Nostrin  | 1.08 | 0.00 | 0.00 | 0.43 | 0.11 | 0 | Endothelial |
| Esam     | 1.08 | 0.00 | 0.00 | 0.49 | 0.14 | 0 | Endothelial |
| Sgk1     | 1.08 | 0.00 | 0.00 | 0.45 | 0.16 | 0 | Endothelial |
| Myzap    | 1.07 | 0.00 | 0.00 | 0.43 | 0.11 | 0 | Endothelial |
| Ushbp1   | 1.05 | 0.00 | 0.00 | 0.32 | 0.06 | 0 | Endothelial |
| Mest     | 1.05 | 0.00 | 0.00 | 0.49 | 0.16 | 0 | Endothelial |
| Sema3g   | 1.04 | 0.00 | 0.00 | 0.28 | 0.05 | 0 | Endothelial |
| Itga6    | 1.04 | 0.00 | 0.00 | 0.37 | 0.11 | 0 | Endothelial |
| Myct1    | 1.04 | 0.00 | 0.00 | 0.41 | 0.10 | 0 | Endothelial |
| Thbd     | 1.04 | 0.00 | 0.00 | 0.56 | 0.21 | 0 | Endothelial |
| Tubb2a   | 1.04 | 0.00 | 0.00 | 0.46 | 0.18 | 0 | Endothelial |
| Acer2    | 1.02 | 0.00 | 0.00 | 0.31 | 0.07 | 0 | Endothelial |
| Ripply3  | 1.02 | 0.00 | 0.00 | 0.38 | 0.09 | 0 | Endothelial |
| Fmo1     | 1.01 | 0.00 | 0.00 | 0.34 | 0.09 | 0 | Endothelial |
| Ppap2a   | 1.01 | 0.00 | 0.00 | 0.46 | 0.16 | 0 | Endothelial |
| Flt1     | 1.01 | 0.00 | 0.00 | 0.42 | 0.12 | 0 | Endothelial |
| Slc9a3r2 | 1.01 | 0.00 | 0.00 | 0.49 | 0.17 | 0 | Endothelial |
| Acvrl1   | 1.00 | 0.00 | 0.00 | 0.47 | 0.14 | 0 | Endothelial |
| Tnfsf10  | 1.00 | 0.00 | 0.00 | 0.30 | 0.06 | 0 | Endothelial |
| Erg      | 1.00 | 0.00 | 0.00 | 0.37 | 0.10 | 0 | Endothelial |
| Ccnd1    | 0.98 | 0.00 | 0.00 | 0.42 | 0.16 | 0 | Endothelial |
| Ets1     | 0.97 | 0.00 | 0.00 | 0.52 | 0.21 | 0 | Endothelial |
| Tie1     | 0.97 | 0.00 | 0.00 | 0.35 | 0.08 | 0 | Endothelial |
| Aqp1     | 0.97 | 0.00 | 0.00 | 0.48 | 0.16 | 0 | Endothelial |
| Scn3b    | 0.96 | 0.00 | 0.00 | 0.26 | 0.05 | 0 | Endothelial |
| Podxl    | 0.96 | 0.00 | 0.00 | 0.31 | 0.08 | 0 | Endothelial |
| Aplnr    | 0.94 | 0.00 | 0.00 | 0.25 | 0.05 | 0 | Endothelial |
| Emcn     | 0.93 | 0.00 | 0.00 | 0.33 | 0.08 | 0 | Endothelial |
| Tjp1     | 0.93 | 0.00 | 0.00 | 0.37 | 0.13 | 0 | Endothelial |
| Ece1     | 0.92 | 0.00 | 0.00 | 0.53 | 0.22 | 0 | Endothelial |
| Icam2    | 0.92 | 0.00 | 0.00 | 0.44 | 0.12 | 0 | Endothelial |

|               |      |      |      |      |      |   |             |
|---------------|------|------|------|------|------|---|-------------|
| Pde4b         | 0.92 | 0.00 | 0.00 | 0.34 | 0.12 | 0 | Endothelial |
| Slc43a3       | 0.92 | 0.00 | 0.00 | 0.48 | 0.18 | 0 | Endothelial |
| Fkbp1a        | 0.91 | 0.00 | 0.00 | 0.68 | 0.37 | 0 | Endothelial |
| Tubb2b        | 0.89 | 0.00 | 0.00 | 0.32 | 0.11 | 0 | Endothelial |
| Gata2         | 0.89 | 0.00 | 0.00 | 0.37 | 0.11 | 0 | Endothelial |
| Cd34          | 0.89 | 0.00 | 0.00 | 0.45 | 0.17 | 0 | Endothelial |
| Id3           | 0.89 | 0.00 | 0.00 | 0.75 | 0.42 | 0 | Endothelial |
| Klhl5         | 0.88 | 0.00 | 0.00 | 0.34 | 0.12 | 0 | Endothelial |
| Tbx3          | 0.88 | 0.00 | 0.00 | 0.47 | 0.17 | 0 | Endothelial |
| Ly6e          | 0.87 | 0.00 | 0.00 | 0.75 | 0.38 | 0 | Endothelial |
| Slco2a1       | 0.87 | 0.00 | 0.00 | 0.30 | 0.09 | 0 | Endothelial |
| Ddah2         | 0.87 | 0.00 | 0.00 | 0.50 | 0.23 | 0 | Endothelial |
| Ptprm         | 0.86 | 0.00 | 0.00 | 0.26 | 0.08 | 0 | Endothelial |
| Foxp1         | 0.86 | 0.00 | 0.00 | 0.69 | 0.42 | 0 | Endothelial |
| Col4a2        | 0.86 | 0.00 | 0.00 | 0.69 | 0.40 | 0 | Endothelial |
| Casz1         | 0.86 | 0.00 | 0.00 | 0.32 | 0.11 | 0 | Endothelial |
| Col4a1        | 0.86 | 0.00 | 0.00 | 0.75 | 0.46 | 0 | Endothelial |
| Srgn          | 0.85 | 0.00 | 0.00 | 0.65 | 0.28 | 0 | Endothelial |
| Piezo2        | 0.85 | 0.00 | 0.00 | 0.29 | 0.09 | 0 | Endothelial |
| 4931406P16Rik | 0.85 | 0.00 | 0.00 | 0.38 | 0.16 | 0 | Endothelial |
| Cav2          | 0.84 | 0.00 | 0.00 | 0.41 | 0.16 | 0 | Endothelial |
| Gng11         | 0.84 | 0.00 | 0.00 | 0.57 | 0.25 | 0 | Endothelial |
| Ly6a          | 0.84 | 0.00 | 0.00 | 0.46 | 0.16 | 0 | Endothelial |
| 9430020K01Rik | 0.84 | 0.00 | 0.00 | 0.31 | 0.11 | 0 | Endothelial |
| Cxx1a         | 0.84 | 0.00 | 0.00 | 0.45 | 0.19 | 0 | Endothelial |
| Ppp1r16b      | 0.82 | 0.00 | 0.00 | 0.26 | 0.07 | 0 | Endothelial |
| Ahr           | 0.81 | 0.00 | 0.00 | 0.26 | 0.07 | 0 | Endothelial |
| Kdr           | 0.80 | 0.00 | 0.00 | 0.45 | 0.13 | 0 | Endothelial |
| Gimap4        | 0.80 | 0.00 | 0.00 | 0.42 | 0.14 | 0 | Endothelial |
| Gimap1        | 0.79 | 0.00 | 0.00 | 0.34 | 0.11 | 0 | Endothelial |
| Anp32a        | 0.78 | 0.00 | 0.00 | 0.78 | 0.58 | 0 | Endothelial |
| Rhoj          | 0.77 | 0.00 | 0.00 | 0.39 | 0.16 | 0 | Endothelial |
| Sptbn1        | 0.77 | 0.00 | 0.00 | 0.76 | 0.52 | 0 | Endothelial |
| Mcam          | 0.75 | 0.00 | 0.00 | 0.32 | 0.11 | 0 | Endothelial |
| Crip2         | 0.72 | 0.00 | 0.00 | 0.65 | 0.38 | 0 | Endothelial |
| Itm2b         | 0.64 | 0.00 | 0.00 | 0.87 | 0.74 | 0 | Endothelial |
| Clic5         | 0.57 | 0.00 | 0.00 | 0.48 | 0.20 | 0 | Endothelial |
| Kitl          | 0.56 | 0.00 | 0.00 | 0.45 | 0.20 | 0 | Endothelial |
| Vim           | 0.55 | 0.00 | 0.00 | 0.87 | 0.63 | 0 | Endothelial |
| Emp1          | 0.78 | 0.00 | 0.00 | 0.43 | 0.19 | 0 | Endothelial |
| Tmem88        | 0.80 | 0.00 | 0.00 | 0.28 | 0.09 | 0 | Endothelial |
| Elk3          | 0.82 | 0.00 | 0.00 | 0.32 | 0.11 | 0 | Endothelial |
| Cxx1b         | 0.80 | 0.00 | 0.00 | 0.43 | 0.20 | 0 | Endothelial |

|               |      |      |      |      |      |   |             |
|---------------|------|------|------|------|------|---|-------------|
| 2810025M15Rik | 0.79 | 0.00 | 0.00 | 0.30 | 0.10 | 0 | Endothelial |
| S1pr1         | 0.76 | 0.00 | 0.00 | 0.39 | 0.16 | 0 | Endothelial |
| Prcp          | 0.79 | 0.00 | 0.00 | 0.25 | 0.08 | 0 | Endothelial |
| Cxx1c         | 0.80 | 0.00 | 0.00 | 0.43 | 0.19 | 0 | Endothelial |
| Sparcl1       | 0.78 | 0.00 | 0.00 | 0.61 | 0.36 | 0 | Endothelial |
| Tcf4          | 0.74 | 0.00 | 0.00 | 0.62 | 0.38 | 0 | Endothelial |
| Nrp1          | 0.70 | 0.00 | 0.00 | 0.61 | 0.37 | 0 | Endothelial |
| Heg1          | 0.83 | 0.00 | 0.00 | 0.35 | 0.14 | 0 | Endothelial |
| Lxn           | 0.81 | 0.00 | 0.00 | 0.29 | 0.10 | 0 | Endothelial |
| Prx           | 0.66 | 0.00 | 0.00 | 0.27 | 0.08 | 0 | Endothelial |
| Cd200         | 0.71 | 0.00 | 0.00 | 0.49 | 0.25 | 0 | Endothelial |
| Ptrf          | 0.74 | 0.00 | 0.00 | 0.55 | 0.33 | 0 | Endothelial |
| Myl12b        | 0.61 | 0.00 | 0.00 | 0.73 | 0.59 | 0 | Endothelial |
| Ccdc85b       | 0.77 | 0.00 | 0.00 | 0.28 | 0.10 | 0 | Endothelial |
| Guk1          | 0.85 | 0.00 | 0.00 | 0.32 | 0.13 | 0 | Endothelial |
| Prex2         | 0.81 | 0.00 | 0.00 | 0.37 | 0.16 | 0 | Endothelial |
| Pitpnc1       | 0.77 | 0.00 | 0.00 | 0.28 | 0.10 | 0 | Endothelial |
| Rdx           | 0.71 | 0.00 | 0.00 | 0.63 | 0.43 | 0 | Endothelial |
| B2m           | 0.44 | 0.00 | 0.00 | 0.83 | 0.65 | 0 | Endothelial |
| Hoxa5         | 0.79 | 0.00 | 0.00 | 0.29 | 0.11 | 0 | Endothelial |
| Gimap5        | 0.70 | 0.00 | 0.00 | 0.27 | 0.10 | 0 | Endothelial |
| Eng           | 0.70 | 0.00 | 0.00 | 0.27 | 0.10 | 0 | Endothelial |
| Cd97          | 0.73 | 0.00 | 0.00 | 0.36 | 0.16 | 0 | Endothelial |
| Arhgap29      | 0.76 | 0.00 | 0.00 | 0.40 | 0.19 | 0 | Endothelial |
| Ybx1          | 0.51 | 0.00 | 0.00 | 0.77 | 0.62 | 0 | Endothelial |
| Slc6a6        | 0.91 | 0.00 | 0.00 | 0.43 | 0.23 | 0 | Endothelial |
| Sema6a        | 0.70 | 0.00 | 0.00 | 0.27 | 0.10 | 0 | Endothelial |
| Id1           | 0.72 | 0.00 | 0.00 | 0.42 | 0.22 | 0 | Endothelial |
| Grap          | 0.68 | 0.00 | 0.00 | 0.29 | 0.11 | 0 | Endothelial |
| Rapgef5       | 0.72 | 0.00 | 0.00 | 0.25 | 0.09 | 0 | Endothelial |
| Kank3         | 0.73 | 0.00 | 0.00 | 0.30 | 0.12 | 0 | Endothelial |
| Klf4          | 0.66 | 0.00 | 0.00 | 0.42 | 0.21 | 0 | Endothelial |
| Jup           | 0.73 | 0.00 | 0.00 | 0.32 | 0.14 | 0 | Endothelial |
| Bst2          | 0.70 | 0.00 | 0.00 | 0.29 | 0.12 | 0 | Endothelial |
| Gnai2         | 0.66 | 0.00 | 0.00 | 0.56 | 0.36 | 0 | Endothelial |
| Cnn3          | 0.64 | 0.00 | 0.00 | 0.49 | 0.28 | 0 | Endothelial |
| Hip1          | 0.73 | 0.00 | 0.00 | 0.32 | 0.14 | 0 | Endothelial |
| Itgb1         | 0.49 | 0.00 | 0.00 | 0.77 | 0.61 | 0 | Endothelial |
| Rgs12         | 0.69 | 0.00 | 0.00 | 0.27 | 0.10 | 0 | Endothelial |
| Gimap6        | 0.62 | 0.00 | 0.00 | 0.33 | 0.14 | 0 | Endothelial |
| Ptprg         | 0.74 | 0.00 | 0.00 | 0.27 | 0.11 | 0 | Endothelial |
| Sox4          | 0.67 | 0.00 | 0.00 | 0.55 | 0.34 | 0 | Endothelial |
| Ly6c1         | 0.62 | 0.00 | 0.00 | 0.36 | 0.17 | 0 | Endothelial |

|          |      |      |      |      |      |   |             |
|----------|------|------|------|------|------|---|-------------|
| Notch1   | 0.74 | 0.00 | 0.00 | 0.28 | 0.12 | 0 | Endothelial |
| Slk      | 0.67 | 0.00 | 0.00 | 0.59 | 0.41 | 0 | Endothelial |
| H2-D1    | 0.49 | 0.00 | 0.00 | 0.68 | 0.47 | 0 | Endothelial |
| Pltp     | 0.71 | 0.00 | 0.00 | 0.34 | 0.16 | 0 | Endothelial |
| Snrk     | 0.72 | 0.00 | 0.00 | 0.31 | 0.14 | 0 | Endothelial |
| Dlc1     | 0.71 | 0.00 | 0.00 | 0.33 | 0.15 | 0 | Endothelial |
| Nes      | 0.53 | 0.00 | 0.00 | 0.40 | 0.19 | 0 | Endothelial |
| Cyth3    | 0.68 | 0.00 | 0.00 | 0.41 | 0.22 | 0 | Endothelial |
| Foxf1    | 0.66 | 0.00 | 0.00 | 0.26 | 0.10 | 0 | Endothelial |
| Snx3     | 0.67 | 0.00 | 0.00 | 0.49 | 0.31 | 0 | Endothelial |
| Rgcc     | 0.53 | 0.00 | 0.00 | 0.34 | 0.16 | 0 | Endothelial |
| Jun      | 0.42 | 0.00 | 0.00 | 0.56 | 0.34 | 0 | Endothelial |
| Dusp3    | 0.67 | 0.00 | 0.00 | 0.35 | 0.17 | 0 | Endothelial |
| Arhgef12 | 0.74 | 0.00 | 0.00 | 0.39 | 0.22 | 0 | Endothelial |
| Tmsb10   | 0.31 | 0.00 | 0.00 | 0.94 | 0.85 | 0 | Endothelial |
| Ablim1   | 0.72 | 0.00 | 0.00 | 0.41 | 0.23 | 0 | Endothelial |
| Lgals9   | 0.64 | 0.00 | 0.00 | 0.28 | 0.13 | 0 | Endothelial |
| Cd151    | 0.66 | 0.00 | 0.00 | 0.31 | 0.14 | 0 | Endothelial |
| Smarca2  | 0.71 | 0.00 | 0.00 | 0.49 | 0.33 | 0 | Endothelial |
| Pea15a   | 0.65 | 0.00 | 0.00 | 0.28 | 0.13 | 0 | Endothelial |
| Marcks   | 0.40 | 0.00 | 0.00 | 0.68 | 0.48 | 0 | Endothelial |
| Ctnna1   | 0.64 | 0.00 | 0.00 | 0.51 | 0.34 | 0 | Endothelial |
| Stmn1    | 0.55 | 0.00 | 0.00 | 0.39 | 0.22 | 0 | Endothelial |
| Cd9      | 0.43 | 0.00 | 0.00 | 0.52 | 0.33 | 0 | Endothelial |
| Uaca     | 0.67 | 0.00 | 0.00 | 0.27 | 0.12 | 0 | Endothelial |
| Ifitm3   | 0.50 | 0.00 | 0.00 | 0.55 | 0.38 | 0 | Endothelial |
| Klf7     | 0.61 | 0.00 | 0.00 | 0.32 | 0.17 | 0 | Endothelial |
| Marcksl1 | 0.63 | 0.00 | 0.00 | 0.33 | 0.18 | 0 | Endothelial |
| Fnbp1l   | 0.63 | 0.00 | 0.00 | 0.39 | 0.24 | 0 | Endothelial |
| Fermt2   | 0.47 | 0.00 | 0.00 | 0.54 | 0.38 | 0 | Endothelial |
| Rhoc     | 0.59 | 0.00 | 0.00 | 0.34 | 0.19 | 0 | Endothelial |
| Lphn2    | 0.57 | 0.00 | 0.00 | 0.26 | 0.12 | 0 | Endothelial |
| Mgll     | 0.62 | 0.00 | 0.00 | 0.29 | 0.14 | 0 | Endothelial |
| Dnajc8   | 0.53 | 0.00 | 0.00 | 0.54 | 0.41 | 0 | Endothelial |
| Hes1     | 0.65 | 0.00 | 0.00 | 0.43 | 0.28 | 0 | Endothelial |
| Anxa3    | 0.50 | 0.00 | 0.00 | 0.36 | 0.21 | 0 | Endothelial |
| Plk2     | 0.64 | 0.00 | 0.00 | 0.28 | 0.15 | 0 | Endothelial |
| Aplp2    | 0.54 | 0.00 | 0.00 | 0.51 | 0.37 | 0 | Endothelial |
| Gcc2     | 0.65 | 0.00 | 0.00 | 0.38 | 0.23 | 0 | Endothelial |
| Rab11a   | 0.57 | 0.00 | 0.00 | 0.38 | 0.25 | 0 | Endothelial |
| Luzp1    | 0.61 | 0.00 | 0.00 | 0.32 | 0.18 | 0 | Endothelial |
| Wasf2    | 0.59 | 0.00 | 0.00 | 0.42 | 0.29 | 0 | Endothelial |
| Mllt4    | 0.61 | 0.00 | 0.00 | 0.33 | 0.20 | 0 | Endothelial |

|           |      |      |      |      |      |   |             |
|-----------|------|------|------|------|------|---|-------------|
| Dusp6     | 0.57 | 0.00 | 0.00 | 0.30 | 0.17 | 0 | Endothelial |
| Tpm4      | 0.43 | 0.00 | 0.00 | 0.60 | 0.48 | 0 | Endothelial |
| Tubb5     | 0.42 | 0.00 | 0.00 | 0.56 | 0.43 | 0 | Endothelial |
| Klf2      | 0.53 | 0.00 | 0.00 | 0.32 | 0.18 | 0 | Endothelial |
| Actn4     | 0.57 | 0.00 | 0.00 | 0.40 | 0.28 | 0 | Endothelial |
| Hsp90ab1  | 0.25 | 0.00 | 0.00 | 0.91 | 0.89 | 0 | Endothelial |
| Xiap      | 0.60 | 0.00 | 0.00 | 0.31 | 0.19 | 0 | Endothelial |
| Cyb5r3    | 0.53 | 0.00 | 0.00 | 0.49 | 0.38 | 0 | Endothelial |
| Rap1a     | 0.51 | 0.00 | 0.00 | 0.42 | 0.29 | 0 | Endothelial |
| Efnb1     | 0.55 | 0.00 | 0.00 | 0.25 | 0.14 | 0 | Endothelial |
| Ppp1r2    | 0.46 | 0.00 | 0.00 | 0.38 | 0.25 | 0 | Endothelial |
| Oaz2      | 0.58 | 0.00 | 0.00 | 0.39 | 0.27 | 0 | Endothelial |
| Ctnnd1    | 0.54 | 0.00 | 0.00 | 0.27 | 0.15 | 0 | Endothelial |
| Atp1b3    | 0.55 | 0.00 | 0.00 | 0.36 | 0.24 | 0 | Endothelial |
| Sptan1    | 0.56 | 0.00 | 0.00 | 0.27 | 0.16 | 0 | Endothelial |
| Clic1     | 0.46 | 0.00 | 0.00 | 0.48 | 0.37 | 0 | Endothelial |
| Zfp503    | 0.55 | 0.00 | 0.00 | 0.25 | 0.14 | 0 | Endothelial |
| Peg3      | 0.39 | 0.00 | 0.00 | 0.43 | 0.29 | 0 | Endothelial |
| Bnip2     | 0.53 | 0.00 | 0.00 | 0.41 | 0.29 | 0 | Endothelial |
| Msn       | 0.40 | 0.00 | 0.00 | 0.53 | 0.42 | 0 | Endothelial |
| Map7d1    | 0.55 | 0.00 | 0.00 | 0.28 | 0.17 | 0 | Endothelial |
| Tuba1a    | 0.32 | 0.00 | 0.00 | 0.62 | 0.49 | 0 | Endothelial |
| Ubb       | 0.25 | 0.00 | 0.00 | 0.83 | 0.80 | 0 | Endothelial |
| Gm26735   | 0.54 | 0.00 | 0.00 | 0.30 | 0.18 | 0 | Endothelial |
| Sypl      | 0.52 | 0.00 | 0.00 | 0.36 | 0.25 | 0 | Endothelial |
| F11r      | 0.49 | 0.00 | 0.00 | 0.26 | 0.15 | 0 | Endothelial |
| Leprot    | 0.48 | 0.00 | 0.00 | 0.43 | 0.32 | 0 | Endothelial |
| Plcg1     | 0.54 | 0.00 | 0.00 | 0.26 | 0.15 | 0 | Endothelial |
| Myl12a    | 0.30 | 0.00 | 0.00 | 0.70 | 0.65 | 0 | Endothelial |
| Dynll1    | 0.40 | 0.00 | 0.00 | 0.54 | 0.44 | 0 | Endothelial |
| Tmem204   | 0.44 | 0.00 | 0.00 | 0.25 | 0.15 | 0 | Endothelial |
| Mfap2     | 0.31 | 0.00 | 0.00 | 0.48 | 0.33 | 0 | Endothelial |
| Add3      | 0.48 | 0.00 | 0.00 | 0.38 | 0.27 | 0 | Endothelial |
| Serpinh1  | 0.32 | 0.00 | 0.00 | 0.51 | 0.38 | 0 | Endothelial |
| Hnrnpa2b1 | 0.29 | 0.00 | 0.00 | 0.75 | 0.72 | 0 | Endothelial |
| Ywhab     | 0.35 | 0.00 | 0.00 | 0.62 | 0.56 | 0 | Endothelial |
| Itpril2   | 0.50 | 0.00 | 0.00 | 0.26 | 0.16 | 0 | Endothelial |
| Acap2     | 0.49 | 0.00 | 0.00 | 0.28 | 0.19 | 0 | Endothelial |
| Cfl1      | 0.34 | 0.00 | 0.00 | 0.63 | 0.58 | 0 | Endothelial |
| Sh3glb1   | 0.41 | 0.00 | 0.00 | 0.48 | 0.39 | 0 | Endothelial |
| H2-K1     | 0.37 | 0.00 | 0.00 | 0.42 | 0.31 | 0 | Endothelial |
| Ctnnb1    | 0.44 | 0.00 | 0.00 | 0.42 | 0.34 | 0 | Endothelial |
| Tax1bp1   | 0.39 | 0.00 | 0.00 | 0.67 | 0.63 | 0 | Endothelial |

|               |      |      |      |      |      |   |             |
|---------------|------|------|------|------|------|---|-------------|
| Hspa8         | 0.25 | 0.00 | 0.00 | 0.70 | 0.67 | 0 | Endothelial |
| Arf1          | 0.39 | 0.00 | 0.00 | 0.49 | 0.42 | 0 | Endothelial |
| Dnaja1        | 0.33 | 0.00 | 0.00 | 0.56 | 0.51 | 0 | Endothelial |
| Csnk1a1       | 0.32 | 0.00 | 0.00 | 0.58 | 0.53 | 0 | Endothelial |
| Eif4g2        | 0.40 | 0.00 | 0.00 | 0.47 | 0.40 | 0 | Endothelial |
| Rhoa          | 0.35 | 0.00 | 0.00 | 0.51 | 0.46 | 0 | Endothelial |
| Fubp1         | 0.45 | 0.00 | 0.00 | 0.32 | 0.24 | 0 | Endothelial |
| Rnf7          | 0.42 | 0.00 | 0.00 | 0.31 | 0.23 | 0 | Endothelial |
| Akr1a1        | 0.32 | 0.00 | 0.00 | 0.53 | 0.49 | 0 | Endothelial |
| Hbb-bs        | 0.41 | 0.00 | 0.00 | 0.81 | 0.81 | 0 | Endothelial |
| Adamts1       | 0.33 | 0.00 | 0.00 | 0.29 | 0.20 | 0 | Endothelial |
| Hook3         | 0.43 | 0.00 | 0.00 | 0.29 | 0.22 | 0 | Endothelial |
| Hbb-bt        | 0.43 | 0.00 | 0.00 | 0.72 | 0.71 | 0 | Endothelial |
| Snrpb         | 0.37 | 0.00 | 0.00 | 0.41 | 0.35 | 0 | Endothelial |
| Phldb2        | 0.38 | 0.00 | 0.00 | 0.36 | 0.28 | 0 | Endothelial |
| Glul          | 0.35 | 0.00 | 0.00 | 0.29 | 0.22 | 0 | Endothelial |
| Ywhae         | 0.28 | 0.00 | 0.00 | 0.57 | 0.54 | 0 | Endothelial |
| Ralb          | 0.37 | 0.00 | 0.00 | 0.26 | 0.19 | 0 | Endothelial |
| Dync1i2       | 0.33 | 0.00 | 0.00 | 0.51 | 0.48 | 0 | Endothelial |
| Hmg20b        | 0.39 | 0.00 | 0.00 | 0.39 | 0.33 | 0 | Endothelial |
| Tmco1         | 0.39 | 0.00 | 0.00 | 0.35 | 0.29 | 0 | Endothelial |
| Sept11        | 0.36 | 0.00 | 0.00 | 0.29 | 0.22 | 0 | Endothelial |
| Cdc42         | 0.27 | 0.00 | 0.00 | 0.57 | 0.54 | 0 | Endothelial |
| Clic4         | 0.35 | 0.00 | 0.00 | 0.35 | 0.29 | 0 | Endothelial |
| Zmiz1         | 0.40 | 0.00 | 0.00 | 0.28 | 0.21 | 0 | Endothelial |
| Top1          | 0.34 | 0.00 | 0.00 | 0.49 | 0.45 | 0 | Endothelial |
| 1700020114Rik | 0.39 | 0.00 | 0.00 | 0.28 | 0.22 | 0 | Endothelial |
| Arpc3         | 0.37 | 0.00 | 0.00 | 0.32 | 0.26 | 0 | Endothelial |
| Zbtb20        | 0.36 | 0.00 | 0.00 | 0.33 | 0.26 | 0 | Endothelial |
| H1f0          | 0.38 | 0.00 | 0.00 | 0.32 | 0.26 | 0 | Endothelial |
| Ndufa8        | 0.38 | 0.00 | 0.00 | 0.30 | 0.25 | 0 | Endothelial |
| Ifngr1        | 0.32 | 0.00 | 0.00 | 0.30 | 0.23 | 0 | Endothelial |
| Rab6a         | 0.39 | 0.00 | 0.00 | 0.26 | 0.21 | 0 | Endothelial |
| Nap1l4        | 0.38 | 0.00 | 0.00 | 0.31 | 0.26 | 0 | Endothelial |
| Cyb5          | 0.36 | 0.00 | 0.00 | 0.31 | 0.26 | 0 | Endothelial |
| Cd2ap         | 0.35 | 0.00 | 0.00 | 0.39 | 0.34 | 0 | Endothelial |
| Mef2a         | 0.30 | 0.00 | 0.00 | 0.41 | 0.36 | 0 | Endothelial |
| Hba-a2        | 0.41 | 0.00 | 0.00 | 0.70 | 0.70 | 0 | Endothelial |
| Gnb1          | 0.36 | 0.00 | 0.00 | 0.27 | 0.21 | 0 | Endothelial |
| Rab1          | 0.34 | 0.00 | 0.00 | 0.35 | 0.30 | 0 | Endothelial |
| Rac1          | 0.35 | 0.00 | 0.00 | 0.34 | 0.30 | 0 | Endothelial |
| Cbx1          | 0.30 | 0.00 | 0.00 | 0.45 | 0.41 | 0 | Endothelial |
| Hba-a1        | 0.41 | 0.00 | 0.00 | 0.70 | 0.71 | 0 | Endothelial |

|               |      |      |      |      |      |   |             |
|---------------|------|------|------|------|------|---|-------------|
| Qk            | 0.32 | 0.00 | 0.00 | 0.34 | 0.29 | 0 | Endothelial |
| Gnaq          | 0.35 | 0.00 | 0.00 | 0.26 | 0.21 | 0 | Endothelial |
| Prdx2         | 0.30 | 0.00 | 0.00 | 0.37 | 0.33 | 0 | Endothelial |
| G3bp2         | 0.33 | 0.00 | 0.00 | 0.35 | 0.31 | 0 | Endothelial |
| S100a13       | 0.32 | 0.00 | 0.00 | 0.30 | 0.25 | 0 | Endothelial |
| Arglu1        | 0.29 | 0.00 | 0.00 | 0.45 | 0.42 | 0 | Endothelial |
| Ccdc50        | 0.35 | 0.00 | 0.00 | 0.30 | 0.26 | 0 | Endothelial |
| Ivns1abp      | 0.42 | 0.00 | 0.00 | 0.27 | 0.22 | 0 | Endothelial |
| Hnrnpf        | 0.29 | 0.00 | 0.00 | 0.38 | 0.34 | 0 | Endothelial |
| Itsn2         | 0.31 | 0.00 | 0.00 | 0.29 | 0.24 | 0 | Endothelial |
| Ktn1          | 0.30 | 0.00 | 0.00 | 0.41 | 0.38 | 0 | Endothelial |
| Mxd4          | 0.27 | 0.00 | 0.00 | 0.41 | 0.37 | 0 | Endothelial |
| Ttc3          | 0.29 | 0.00 | 0.00 | 0.32 | 0.29 | 0 | Endothelial |
| Sept2         | 0.26 | 0.00 | 0.00 | 0.38 | 0.35 | 0 | Endothelial |
| Ywhaq         | 0.26 | 0.00 | 0.00 | 0.39 | 0.36 | 0 | Endothelial |
| Prkar1a       | 0.29 | 0.00 | 0.00 | 0.35 | 0.32 | 0 | Endothelial |
| Apc           | 0.30 | 0.00 | 0.00 | 0.27 | 0.23 | 0 | Endothelial |
| Ppp1ca        | 0.27 | 0.00 | 0.00 | 0.35 | 0.33 | 0 | Endothelial |
| Serinc1       | 0.26 | 0.00 | 0.00 | 0.32 | 0.29 | 0 | Endothelial |
| B230219D22Rik | 0.29 | 0.00 | 0.00 | 0.30 | 0.27 | 0 | Endothelial |
| Csnk2a1       | 0.26 | 0.00 | 0.00 | 0.33 | 0.31 | 0 | Endothelial |
| Zcrb1         | 0.29 | 0.00 | 0.00 | 0.31 | 0.29 | 0 | Endothelial |
| Zc3h7a        | 0.27 | 0.00 | 0.00 | 0.31 | 0.29 | 0 | Endothelial |
| Vps36         | 0.27 | 0.00 | 0.00 | 0.31 | 0.29 | 0 | Endothelial |
| Chmp5         | 0.27 | 0.00 | 0.00 | 0.26 | 0.24 | 0 | Endothelial |
| Rab10         | 0.26 | 0.00 | 0.02 | 0.26 | 0.24 | 0 | Endothelial |
| Dpt           | 2.69 | 0.00 | 0.00 | 0.93 | 0.11 | 1 | Fibroblast  |
| Mfap4         | 2.62 | 0.00 | 0.00 | 0.98 | 0.18 | 1 | Fibroblast  |
| Adh1          | 2.41 | 0.00 | 0.00 | 0.93 | 0.10 | 1 | Fibroblast  |
| Cdh11         | 2.06 | 0.00 | 0.00 | 0.89 | 0.13 | 1 | Fibroblast  |
| Npnt          | 1.99 | 0.00 | 0.00 | 0.89 | 0.18 | 1 | Fibroblast  |
| Macf1         | 1.94 | 0.00 | 0.00 | 0.98 | 0.48 | 1 | Fibroblast  |
| Fhl1          | 1.92 | 0.00 | 0.00 | 0.94 | 0.23 | 1 | Fibroblast  |
| Limch1        | 1.88 | 0.00 | 0.00 | 0.97 | 0.25 | 1 | Fibroblast  |
| Gyg           | 1.85 | 0.00 | 0.00 | 0.84 | 0.13 | 1 | Fibroblast  |
| Rbp1          | 1.83 | 0.00 | 0.00 | 0.84 | 0.14 | 1 | Fibroblast  |
| Fn1           | 1.82 | 0.00 | 0.00 | 0.87 | 0.18 | 1 | Fibroblast  |
| Enpep         | 1.78 | 0.00 | 0.00 | 0.66 | 0.05 | 1 | Fibroblast  |
| Cp            | 1.73 | 0.00 | 0.00 | 0.67 | 0.08 | 1 | Fibroblast  |
| Lbh           | 1.66 | 0.00 | 0.00 | 0.79 | 0.14 | 1 | Fibroblast  |
| Gpc3          | 1.64 | 0.00 | 0.00 | 0.75 | 0.11 | 1 | Fibroblast  |
| Cpm           | 1.64 | 0.00 | 0.00 | 0.72 | 0.13 | 1 | Fibroblast  |
| Plxdc2        | 1.63 | 0.00 | 0.00 | 0.66 | 0.08 | 1 | Fibroblast  |

|          |      |      |      |      |      |   |            |
|----------|------|------|------|------|------|---|------------|
| Meox2    | 1.60 | 0.00 | 0.00 | 0.59 | 0.03 | 1 | Fibroblast |
| Mdk      | 1.60 | 0.00 | 0.00 | 0.77 | 0.13 | 1 | Fibroblast |
| Tcf21    | 1.59 | 0.00 | 0.00 | 0.86 | 0.11 | 1 | Fibroblast |
| Colec12  | 1.59 | 0.00 | 0.00 | 0.60 | 0.06 | 1 | Fibroblast |
| Pcolce2  | 1.58 | 0.00 | 0.00 | 0.59 | 0.05 | 1 | Fibroblast |
| Slit2    | 1.56 | 0.00 | 0.00 | 0.53 | 0.03 | 1 | Fibroblast |
| Maf      | 1.54 | 0.00 | 0.00 | 0.82 | 0.14 | 1 | Fibroblast |
| Ptprd    | 1.53 | 0.00 | 0.00 | 0.61 | 0.07 | 1 | Fibroblast |
| Plac9b   | 1.52 | 0.00 | 0.00 | 0.90 | 0.25 | 1 | Fibroblast |
| Plac9a   | 1.50 | 0.00 | 0.00 | 0.90 | 0.25 | 1 | Fibroblast |
| Nexn     | 1.50 | 0.00 | 0.00 | 0.79 | 0.17 | 1 | Fibroblast |
| Ogn      | 1.49 | 0.00 | 0.00 | 0.65 | 0.09 | 1 | Fibroblast |
| Sh3bgrl  | 1.46 | 0.00 | 0.00 | 0.90 | 0.40 | 1 | Fibroblast |
| Col1a2   | 1.44 | 0.00 | 0.00 | 1.00 | 0.34 | 1 | Fibroblast |
| Figf     | 1.42 | 0.00 | 0.00 | 0.49 | 0.03 | 1 | Fibroblast |
| Serpine2 | 1.42 | 0.00 | 0.00 | 0.85 | 0.20 | 1 | Fibroblast |
| Mmp2     | 1.42 | 0.00 | 0.00 | 0.63 | 0.09 | 1 | Fibroblast |
| Akap12   | 1.40 | 0.00 | 0.00 | 0.76 | 0.19 | 1 | Fibroblast |
| Vcan     | 1.36 | 0.00 | 0.00 | 0.54 | 0.07 | 1 | Fibroblast |
| Itga8    | 1.35 | 0.00 | 0.00 | 0.52 | 0.05 | 1 | Fibroblast |
| Slc27a6  | 1.34 | 0.00 | 0.00 | 0.41 | 0.01 | 1 | Fibroblast |
| Cped1    | 1.31 | 0.00 | 0.00 | 0.51 | 0.06 | 1 | Fibroblast |
| Palld    | 1.29 | 0.00 | 0.00 | 0.66 | 0.13 | 1 | Fibroblast |
| Myh10    | 1.28 | 0.00 | 0.00 | 0.72 | 0.18 | 1 | Fibroblast |
| Col13a1  | 1.28 | 0.00 | 0.00 | 0.52 | 0.06 | 1 | Fibroblast |
| G0s2     | 1.26 | 0.00 | 0.00 | 0.60 | 0.09 | 1 | Fibroblast |
| Nrep     | 1.23 | 0.00 | 0.00 | 0.91 | 0.39 | 1 | Fibroblast |
| Slc38a5  | 1.22 | 0.00 | 0.00 | 0.43 | 0.03 | 1 | Fibroblast |
| Wnt2     | 1.20 | 0.00 | 0.00 | 0.38 | 0.02 | 1 | Fibroblast |
| Mylk     | 1.19 | 0.00 | 0.00 | 0.78 | 0.23 | 1 | Fibroblast |
| Rap2a    | 1.19 | 0.00 | 0.00 | 0.55 | 0.12 | 1 | Fibroblast |
| Vcam1    | 1.18 | 0.00 | 0.00 | 0.40 | 0.03 | 1 | Fibroblast |
| Spon1    | 1.17 | 0.00 | 0.00 | 0.42 | 0.04 | 1 | Fibroblast |
| Mxra8    | 1.15 | 0.00 | 0.00 | 0.58 | 0.13 | 1 | Fibroblast |
| Serping1 | 1.13 | 0.00 | 0.00 | 0.53 | 0.09 | 1 | Fibroblast |
| Phex     | 1.12 | 0.00 | 0.00 | 0.33 | 0.01 | 1 | Fibroblast |
| Ilgp1    | 1.11 | 0.00 | 0.00 | 0.49 | 0.10 | 1 | Fibroblast |
| Snai2    | 1.11 | 0.00 | 0.00 | 0.48 | 0.09 | 1 | Fibroblast |
| Specc1l  | 1.11 | 0.00 | 0.00 | 0.46 | 0.09 | 1 | Fibroblast |
| Mgp      | 1.10 | 0.00 | 0.00 | 0.89 | 0.26 | 1 | Fibroblast |
| Atp1a2   | 1.10 | 0.00 | 0.00 | 0.46 | 0.07 | 1 | Fibroblast |
| Olfml3   | 1.09 | 0.00 | 0.00 | 0.43 | 0.05 | 1 | Fibroblast |
| Fblim1   | 1.05 | 0.00 | 0.00 | 0.56 | 0.13 | 1 | Fibroblast |

|               |      |      |      |      |      |   |            |
|---------------|------|------|------|------|------|---|------------|
| Tns3          | 1.05 | 0.00 | 0.00 | 0.43 | 0.08 | 1 | Fibroblast |
| Col1a1        | 1.05 | 0.00 | 0.00 | 0.81 | 0.21 | 1 | Fibroblast |
| Gpm6b         | 1.04 | 0.00 | 0.00 | 0.43 | 0.08 | 1 | Fibroblast |
| Ablim3        | 1.04 | 0.00 | 0.00 | 0.34 | 0.02 | 1 | Fibroblast |
| Igfbp4        | 1.03 | 0.00 | 0.00 | 0.66 | 0.22 | 1 | Fibroblast |
| Bgn           | 1.03 | 0.00 | 0.00 | 0.70 | 0.20 | 1 | Fibroblast |
| Fbln5         | 1.03 | 0.00 | 0.00 | 0.59 | 0.14 | 1 | Fibroblast |
| Col3a1        | 1.02 | 0.00 | 0.00 | 0.96 | 0.27 | 1 | Fibroblast |
| Phlda1        | 1.02 | 0.00 | 0.00 | 0.59 | 0.17 | 1 | Fibroblast |
| Adarb1        | 1.01 | 0.00 | 0.00 | 0.37 | 0.05 | 1 | Fibroblast |
| Col6a3        | 1.01 | 0.00 | 0.00 | 0.42 | 0.07 | 1 | Fibroblast |
| Sept4         | 1.00 | 0.00 | 0.00 | 0.67 | 0.19 | 1 | Fibroblast |
| Hivep3        | 1.00 | 0.00 | 0.00 | 0.37 | 0.05 | 1 | Fibroblast |
| Nebi          | 0.99 | 0.00 | 0.00 | 0.41 | 0.07 | 1 | Fibroblast |
| Ces1d         | 0.97 | 0.00 | 0.00 | 0.47 | 0.14 | 1 | Fibroblast |
| Clec3b        | 0.97 | 0.00 | 0.00 | 0.37 | 0.04 | 1 | Fibroblast |
| Chst2         | 0.97 | 0.00 | 0.00 | 0.33 | 0.04 | 1 | Fibroblast |
| Fbn1          | 0.96 | 0.00 | 0.00 | 0.53 | 0.14 | 1 | Fibroblast |
| Tril          | 0.96 | 0.00 | 0.00 | 0.35 | 0.05 | 1 | Fibroblast |
| Ednra         | 0.95 | 0.00 | 0.00 | 0.37 | 0.06 | 1 | Fibroblast |
| Cacna1d       | 0.95 | 0.00 | 0.00 | 0.33 | 0.03 | 1 | Fibroblast |
| 0610007N19Rik | 0.95 | 0.00 | 0.00 | 0.48 | 0.12 | 1 | Fibroblast |
| Cpxm1         | 0.94 | 0.00 | 0.00 | 0.28 | 0.02 | 1 | Fibroblast |
| Csrp1         | 0.94 | 0.00 | 0.00 | 0.49 | 0.14 | 1 | Fibroblast |
| Angpt1        | 0.92 | 0.00 | 0.00 | 0.34 | 0.05 | 1 | Fibroblast |
| Zyx           | 0.91 | 0.00 | 0.00 | 0.53 | 0.17 | 1 | Fibroblast |
| Ccdc80        | 0.91 | 0.00 | 0.00 | 0.41 | 0.09 | 1 | Fibroblast |
| Frem1         | 0.91 | 0.00 | 0.00 | 0.31 | 0.04 | 1 | Fibroblast |
| Acadsb        | 0.90 | 0.00 | 0.00 | 0.38 | 0.08 | 1 | Fibroblast |
| Pdlim2        | 0.90 | 0.00 | 0.00 | 0.48 | 0.15 | 1 | Fibroblast |
| Slc36a2       | 0.89 | 0.00 | 0.00 | 0.28 | 0.02 | 1 | Fibroblast |
| Gsn           | 0.89 | 0.00 | 0.00 | 0.69 | 0.21 | 1 | Fibroblast |
| Robo2         | 0.88 | 0.00 | 0.00 | 0.36 | 0.07 | 1 | Fibroblast |
| Sned1         | 0.88 | 0.00 | 0.00 | 0.28 | 0.04 | 1 | Fibroblast |
| Mesdc2        | 0.88 | 0.00 | 0.00 | 0.49 | 0.16 | 1 | Fibroblast |
| Loxl1         | 0.87 | 0.00 | 0.00 | 0.41 | 0.08 | 1 | Fibroblast |
| Nr2f2         | 0.87 | 0.00 | 0.00 | 0.55 | 0.18 | 1 | Fibroblast |
| Nfib          | 0.86 | 0.00 | 0.00 | 0.83 | 0.44 | 1 | Fibroblast |
| Adamts17      | 0.85 | 0.00 | 0.00 | 0.26 | 0.02 | 1 | Fibroblast |
| Cnn2          | 0.85 | 0.00 | 0.00 | 0.73 | 0.36 | 1 | Fibroblast |
| Agpat4        | 0.85 | 0.00 | 0.00 | 0.41 | 0.11 | 1 | Fibroblast |
| Nrcam         | 0.85 | 0.00 | 0.00 | 0.29 | 0.04 | 1 | Fibroblast |
| Ppp1r3c       | 0.84 | 0.00 | 0.00 | 0.26 | 0.02 | 1 | Fibroblast |

|               |      |      |      |      |      |   |            |
|---------------|------|------|------|------|------|---|------------|
| Col6a1        | 0.84 | 0.00 | 0.00 | 0.53 | 0.16 | 1 | Fibroblast |
| Vldlr         | 0.84 | 0.00 | 0.00 | 0.38 | 0.09 | 1 | Fibroblast |
| Pcolce        | 0.84 | 0.00 | 0.00 | 0.35 | 0.06 | 1 | Fibroblast |
| Col6a2        | 0.83 | 0.00 | 0.00 | 0.45 | 0.12 | 1 | Fibroblast |
| Spats2l       | 0.83 | 0.00 | 0.00 | 0.32 | 0.07 | 1 | Fibroblast |
| 6030408B16Rik | 0.83 | 0.00 | 0.00 | 0.29 | 0.03 | 1 | Fibroblast |
| Stbd1         | 0.83 | 0.00 | 0.00 | 0.30 | 0.05 | 1 | Fibroblast |
| Tns1          | 0.83 | 0.00 | 0.00 | 0.57 | 0.20 | 1 | Fibroblast |
| Zeb2          | 0.83 | 0.00 | 0.00 | 0.68 | 0.28 | 1 | Fibroblast |
| Tmem119       | 0.82 | 0.00 | 0.00 | 0.29 | 0.03 | 1 | Fibroblast |
| Hadh          | 0.82 | 0.00 | 0.00 | 0.43 | 0.15 | 1 | Fibroblast |
| Isoc1         | 0.81 | 0.00 | 0.00 | 0.30 | 0.06 | 1 | Fibroblast |
| Pcdhga9       | 0.81 | 0.00 | 0.00 | 0.45 | 0.15 | 1 | Fibroblast |
| C230081A13Rik | 0.81 | 0.00 | 0.00 | 0.34 | 0.08 | 1 | Fibroblast |
| Tmsb10        | 0.79 | 0.00 | 0.00 | 0.99 | 0.84 | 1 | Fibroblast |
| Hhip          | 0.79 | 0.00 | 0.00 | 0.30 | 0.05 | 1 | Fibroblast |
| Gfra2         | 0.78 | 0.00 | 0.00 | 0.28 | 0.04 | 1 | Fibroblast |
| Dkk3          | 0.77 | 0.00 | 0.00 | 0.40 | 0.09 | 1 | Fibroblast |
| Fibin         | 0.77 | 0.00 | 0.00 | 0.42 | 0.10 | 1 | Fibroblast |
| Bmp5          | 0.77 | 0.00 | 0.00 | 0.26 | 0.04 | 1 | Fibroblast |
| Lgals1        | 0.77 | 0.00 | 0.00 | 0.90 | 0.37 | 1 | Fibroblast |
| Ism1          | 0.76 | 0.00 | 0.00 | 0.32 | 0.07 | 1 | Fibroblast |
| Ppp1r14a      | 0.76 | 0.00 | 0.00 | 0.34 | 0.06 | 1 | Fibroblast |
| Etv1          | 0.74 | 0.00 | 0.00 | 0.29 | 0.05 | 1 | Fibroblast |
| Lamb1         | 0.74 | 0.00 | 0.00 | 0.42 | 0.14 | 1 | Fibroblast |
| Rbms3         | 0.74 | 0.00 | 0.00 | 0.43 | 0.15 | 1 | Fibroblast |
| Prex2         | 0.72 | 0.00 | 0.00 | 0.46 | 0.16 | 1 | Fibroblast |
| Maged1        | 0.72 | 0.00 | 0.00 | 0.44 | 0.16 | 1 | Fibroblast |
| Rras2         | 0.71 | 0.00 | 0.00 | 0.26 | 0.05 | 1 | Fibroblast |
| Fkbp9         | 0.71 | 0.00 | 0.00 | 0.38 | 0.12 | 1 | Fibroblast |
| Xist          | 0.70 | 0.00 | 0.00 | 0.79 | 0.48 | 1 | Fibroblast |
| Sh3bp5        | 0.70 | 0.00 | 0.00 | 0.47 | 0.17 | 1 | Fibroblast |
| Rarres2       | 0.70 | 0.00 | 0.00 | 0.41 | 0.11 | 1 | Fibroblast |
| Fxyd1         | 0.70 | 0.00 | 0.00 | 0.32 | 0.07 | 1 | Fibroblast |
| Col5a2        | 0.70 | 0.00 | 0.00 | 0.46 | 0.15 | 1 | Fibroblast |
| Fam171a1      | 0.69 | 0.00 | 0.00 | 0.29 | 0.07 | 1 | Fibroblast |
| Rnd3          | 0.68 | 0.00 | 0.00 | 0.26 | 0.06 | 1 | Fibroblast |
| Sparc         | 0.68 | 0.00 | 0.00 | 0.99 | 0.71 | 1 | Fibroblast |
| Cdo1          | 0.66 | 0.00 | 0.00 | 0.27 | 0.05 | 1 | Fibroblast |
| Egflam        | 0.66 | 0.00 | 0.00 | 0.28 | 0.06 | 1 | Fibroblast |
| Hsd11b1       | 0.64 | 0.00 | 0.00 | 0.32 | 0.07 | 1 | Fibroblast |
| Cryab         | 0.60 | 0.00 | 0.00 | 0.39 | 0.12 | 1 | Fibroblast |
| Tpm1          | 0.59 | 0.00 | 0.00 | 0.87 | 0.49 | 1 | Fibroblast |

|               |      |      |      |      |      |   |            |
|---------------|------|------|------|------|------|---|------------|
| Igf1          | 0.57 | 0.00 | 0.00 | 0.38 | 0.12 | 1 | Fibroblast |
| Cdkn1c        | 0.52 | 0.00 | 0.00 | 0.45 | 0.16 | 1 | Fibroblast |
| Igfbp7        | 0.51 | 0.00 | 0.00 | 0.79 | 0.36 | 1 | Fibroblast |
| Sparcl1       | 0.48 | 0.00 | 0.00 | 0.77 | 0.36 | 1 | Fibroblast |
| Fstl1         | 0.46 | 0.00 | 0.00 | 0.84 | 0.41 | 1 | Fibroblast |
| Tnc           | 0.44 | 0.00 | 0.00 | 0.40 | 0.12 | 1 | Fibroblast |
| Fmo2          | 0.37 | 0.00 | 0.00 | 0.49 | 0.14 | 1 | Fibroblast |
| Ugdh          | 0.67 | 0.00 | 0.00 | 0.28 | 0.07 | 1 | Fibroblast |
| Mfap2         | 0.59 | 0.00 | 0.00 | 0.68 | 0.32 | 1 | Fibroblast |
| Nedd4         | 0.63 | 0.00 | 0.00 | 0.81 | 0.51 | 1 | Fibroblast |
| Lims1         | 0.71 | 0.00 | 0.00 | 0.56 | 0.26 | 1 | Fibroblast |
| Limd1         | 0.75 | 0.00 | 0.00 | 0.42 | 0.16 | 1 | Fibroblast |
| Antxr1        | 0.67 | 0.00 | 0.00 | 0.33 | 0.10 | 1 | Fibroblast |
| Nrp2          | 0.65 | 0.00 | 0.00 | 0.25 | 0.06 | 1 | Fibroblast |
| Tbx2          | 0.60 | 0.00 | 0.00 | 0.33 | 0.10 | 1 | Fibroblast |
| Rps4x         | 0.43 | 0.00 | 0.00 | 0.96 | 0.86 | 1 | Fibroblast |
| Kdelc2        | 0.68 | 0.00 | 0.00 | 0.31 | 0.09 | 1 | Fibroblast |
| Timp2         | 0.66 | 0.00 | 0.00 | 0.47 | 0.19 | 1 | Fibroblast |
| Pbx1          | 0.72 | 0.00 | 0.00 | 0.44 | 0.18 | 1 | Fibroblast |
| Selenbp1      | 0.38 | 0.00 | 0.00 | 0.51 | 0.20 | 1 | Fibroblast |
| Nid1          | 0.63 | 0.00 | 0.00 | 0.49 | 0.21 | 1 | Fibroblast |
| Gng11         | 0.54 | 0.00 | 0.00 | 0.59 | 0.26 | 1 | Fibroblast |
| Cd81          | 0.59 | 0.00 | 0.00 | 0.69 | 0.38 | 1 | Fibroblast |
| H6pd          | 0.58 | 0.00 | 0.00 | 0.27 | 0.08 | 1 | Fibroblast |
| Serpinh1      | 0.55 | 0.00 | 0.00 | 0.69 | 0.36 | 1 | Fibroblast |
| Lama4         | 0.63 | 0.00 | 0.00 | 0.34 | 0.12 | 1 | Fibroblast |
| Mbnl2         | 0.68 | 0.00 | 0.00 | 0.61 | 0.32 | 1 | Fibroblast |
| Hmgn1         | 0.61 | 0.00 | 0.00 | 0.71 | 0.43 | 1 | Fibroblast |
| Pltp          | 0.61 | 0.00 | 0.00 | 0.42 | 0.16 | 1 | Fibroblast |
| Adamts2       | 0.53 | 0.00 | 0.00 | 0.29 | 0.09 | 1 | Fibroblast |
| Fkbp7         | 0.60 | 0.00 | 0.00 | 0.33 | 0.12 | 1 | Fibroblast |
| Lmo4          | 0.66 | 0.00 | 0.00 | 0.50 | 0.24 | 1 | Fibroblast |
| Eif4ebp1      | 0.58 | 0.00 | 0.00 | 0.33 | 0.12 | 1 | Fibroblast |
| Eid1          | 0.65 | 0.00 | 0.00 | 0.54 | 0.27 | 1 | Fibroblast |
| Adamts1       | 0.54 | 0.00 | 0.00 | 0.46 | 0.19 | 1 | Fibroblast |
| Tspan3        | 0.60 | 0.00 | 0.00 | 0.36 | 0.14 | 1 | Fibroblast |
| Ywhaq         | 0.63 | 0.00 | 0.00 | 0.61 | 0.35 | 1 | Fibroblast |
| Fgfr1         | 0.60 | 0.00 | 0.00 | 0.28 | 0.09 | 1 | Fibroblast |
| Nisch         | 0.63 | 0.00 | 0.00 | 0.54 | 0.28 | 1 | Fibroblast |
| Cdc16         | 0.63 | 0.00 | 0.00 | 0.36 | 0.14 | 1 | Fibroblast |
| 1700025G04Rik | 0.60 | 0.00 | 0.00 | 0.27 | 0.09 | 1 | Fibroblast |
| Tagln2        | 0.56 | 0.00 | 0.00 | 0.69 | 0.43 | 1 | Fibroblast |
| Tpm2          | 0.34 | 0.00 | 0.00 | 0.34 | 0.12 | 1 | Fibroblast |

|          |      |      |      |      |      |   |            |
|----------|------|------|------|------|------|---|------------|
| Emilin1  | 0.52 | 0.00 | 0.00 | 0.26 | 0.08 | 1 | Fibroblast |
| Prdx5    | 0.46 | 0.00 | 0.00 | 0.57 | 0.30 | 1 | Fibroblast |
| Tmem254a | 0.60 | 0.00 | 0.00 | 0.40 | 0.18 | 1 | Fibroblast |
| Rcn3     | 0.51 | 0.00 | 0.00 | 0.32 | 0.11 | 1 | Fibroblast |
| Bmp4     | 0.56 | 0.00 | 0.00 | 0.27 | 0.09 | 1 | Fibroblast |
| Cox6c    | 0.48 | 0.00 | 0.00 | 0.82 | 0.64 | 1 | Fibroblast |
| Myl9     | 0.33 | 0.00 | 0.00 | 0.31 | 0.11 | 1 | Fibroblast |
| Pmp22    | 0.34 | 0.00 | 0.00 | 0.58 | 0.29 | 1 | Fibroblast |
| Tmem176a | 0.59 | 0.00 | 0.00 | 0.41 | 0.19 | 1 | Fibroblast |
| Lox      | 0.41 | 0.00 | 0.00 | 0.33 | 0.12 | 1 | Fibroblast |
| Mrps6    | 0.58 | 0.00 | 0.00 | 0.27 | 0.09 | 1 | Fibroblast |
| Lima1    | 0.57 | 0.00 | 0.00 | 0.32 | 0.13 | 1 | Fibroblast |
| Tmem254c | 0.59 | 0.00 | 0.00 | 0.38 | 0.17 | 1 | Fibroblast |
| Ccnd2    | 0.53 | 0.00 | 0.00 | 0.52 | 0.26 | 1 | Fibroblast |
| Tmem254b | 0.60 | 0.00 | 0.00 | 0.40 | 0.18 | 1 | Fibroblast |
| Tgfb1i1  | 0.52 | 0.00 | 0.00 | 0.31 | 0.12 | 1 | Fibroblast |
| Gtf2h5   | 0.60 | 0.00 | 0.00 | 0.50 | 0.27 | 1 | Fibroblast |
| Gpr126   | 0.45 | 0.00 | 0.00 | 0.27 | 0.09 | 1 | Fibroblast |
| Flna     | 0.50 | 0.00 | 0.00 | 0.45 | 0.21 | 1 | Fibroblast |
| Zmynd11  | 0.56 | 0.00 | 0.00 | 0.55 | 0.31 | 1 | Fibroblast |
| Ltbp4    | 0.47 | 0.00 | 0.00 | 0.27 | 0.09 | 1 | Fibroblast |
| S100a1   | 0.54 | 0.00 | 0.00 | 0.33 | 0.13 | 1 | Fibroblast |
| Cbx5     | 0.57 | 0.00 | 0.00 | 0.47 | 0.24 | 1 | Fibroblast |
| N6amt1   | 0.53 | 0.00 | 0.00 | 0.29 | 0.11 | 1 | Fibroblast |
| Lrp1     | 0.49 | 0.00 | 0.00 | 0.28 | 0.10 | 1 | Fibroblast |
| Slc25a4  | 0.45 | 0.00 | 0.00 | 0.72 | 0.48 | 1 | Fibroblast |
| Eva1b    | 0.50 | 0.00 | 0.00 | 0.39 | 0.18 | 1 | Fibroblast |
| Nenf     | 0.57 | 0.00 | 0.00 | 0.37 | 0.17 | 1 | Fibroblast |
| mt-Nd1   | 0.32 | 0.00 | 0.00 | 0.97 | 0.91 | 1 | Fibroblast |
| Cd63     | 0.45 | 0.00 | 0.00 | 0.52 | 0.28 | 1 | Fibroblast |
| Tacc1    | 0.56 | 0.00 | 0.00 | 0.42 | 0.21 | 1 | Fibroblast |
| Sox4     | 0.46 | 0.00 | 0.00 | 0.60 | 0.35 | 1 | Fibroblast |
| Ralb     | 0.55 | 0.00 | 0.00 | 0.38 | 0.18 | 1 | Fibroblast |
| Hspa5    | 0.47 | 0.00 | 0.00 | 0.75 | 0.54 | 1 | Fibroblast |
| Slc25a5  | 0.47 | 0.00 | 0.00 | 0.76 | 0.58 | 1 | Fibroblast |
| Vcl      | 0.49 | 0.00 | 0.00 | 0.28 | 0.12 | 1 | Fibroblast |
| Wnt5a    | 0.28 | 0.00 | 0.00 | 0.26 | 0.09 | 1 | Fibroblast |
| Celf2    | 0.45 | 0.00 | 0.00 | 0.48 | 0.26 | 1 | Fibroblast |
| Gm4204   | 0.35 | 0.00 | 0.00 | 0.71 | 0.48 | 1 | Fibroblast |
| Blmh     | 0.51 | 0.00 | 0.00 | 0.34 | 0.16 | 1 | Fibroblast |
| Twsg1    | 0.48 | 0.00 | 0.00 | 0.26 | 0.11 | 1 | Fibroblast |
| Scp2     | 0.51 | 0.00 | 0.00 | 0.52 | 0.31 | 1 | Fibroblast |
| Atpif1   | 0.41 | 0.00 | 0.00 | 0.72 | 0.51 | 1 | Fibroblast |

|               |      |      |      |      |      |   |            |
|---------------|------|------|------|------|------|---|------------|
| Pls3          | 0.49 | 0.00 | 0.00 | 0.37 | 0.19 | 1 | Fibroblast |
| Myo6          | 0.49 | 0.00 | 0.00 | 0.29 | 0.13 | 1 | Fibroblast |
| Tuba1a        | 0.35 | 0.00 | 0.00 | 0.73 | 0.49 | 1 | Fibroblast |
| Selenbp2      | 0.26 | 0.00 | 0.00 | 0.34 | 0.15 | 1 | Fibroblast |
| Socs2         | 0.37 | 0.00 | 0.00 | 0.55 | 0.32 | 1 | Fibroblast |
| Ptms          | 0.47 | 0.00 | 0.00 | 0.59 | 0.38 | 1 | Fibroblast |
| Ech1          | 0.44 | 0.00 | 0.00 | 0.31 | 0.14 | 1 | Fibroblast |
| Cnpy2         | 0.48 | 0.00 | 0.00 | 0.36 | 0.18 | 1 | Fibroblast |
| Rps4y2        | 0.56 | 0.00 | 0.00 | 0.33 | 0.17 | 1 | Fibroblast |
| Gas5          | 0.38 | 0.00 | 0.00 | 0.72 | 0.52 | 1 | Fibroblast |
| Calr          | 0.45 | 0.00 | 0.00 | 0.62 | 0.42 | 1 | Fibroblast |
| Ndufa4        | 0.40 | 0.00 | 0.00 | 0.72 | 0.53 | 1 | Fibroblast |
| Anxa6         | 0.45 | 0.00 | 0.00 | 0.37 | 0.19 | 1 | Fibroblast |
| A630007B06Rik | 0.50 | 0.00 | 0.00 | 0.36 | 0.18 | 1 | Fibroblast |
| Wsb1          | 0.45 | 0.00 | 0.00 | 0.38 | 0.20 | 1 | Fibroblast |
| Sec61b        | 0.43 | 0.00 | 0.00 | 0.64 | 0.45 | 1 | Fibroblast |
| Cd302         | 0.36 | 0.00 | 0.00 | 0.30 | 0.13 | 1 | Fibroblast |
| Gm26735       | 0.42 | 0.00 | 0.00 | 0.36 | 0.18 | 1 | Fibroblast |
| Gpx8          | 0.41 | 0.00 | 0.00 | 0.29 | 0.13 | 1 | Fibroblast |
| Clic4         | 0.41 | 0.00 | 0.00 | 0.48 | 0.28 | 1 | Fibroblast |
| Ppic          | 0.40 | 0.00 | 0.00 | 0.58 | 0.37 | 1 | Fibroblast |
| Smim4         | 0.45 | 0.00 | 0.00 | 0.26 | 0.11 | 1 | Fibroblast |
| Tgfb2         | 0.35 | 0.00 | 0.00 | 0.29 | 0.13 | 1 | Fibroblast |
| Maged2        | 0.40 | 0.00 | 0.00 | 0.33 | 0.16 | 1 | Fibroblast |
| Ckap4         | 0.46 | 0.00 | 0.00 | 0.33 | 0.17 | 1 | Fibroblast |
| Sub1          | 0.37 | 0.00 | 0.00 | 0.68 | 0.50 | 1 | Fibroblast |
| Npr3          | 0.36 | 0.00 | 0.00 | 0.27 | 0.12 | 1 | Fibroblast |
| Hmcn1         | 0.34 | 0.00 | 0.00 | 0.28 | 0.13 | 1 | Fibroblast |
| Tuba1b        | 0.32 | 0.00 | 0.00 | 0.66 | 0.44 | 1 | Fibroblast |
| Nap1l1        | 0.28 | 0.00 | 0.00 | 0.67 | 0.45 | 1 | Fibroblast |
| Lamc1         | 0.45 | 0.00 | 0.00 | 0.30 | 0.15 | 1 | Fibroblast |
| Gas6          | 0.47 | 0.00 | 0.00 | 0.29 | 0.14 | 1 | Fibroblast |
| Dnaja1        | 0.40 | 0.00 | 0.00 | 0.67 | 0.50 | 1 | Fibroblast |
| Rad50         | 0.49 | 0.00 | 0.00 | 0.34 | 0.18 | 1 | Fibroblast |
| Ywhab         | 0.35 | 0.00 | 0.00 | 0.73 | 0.55 | 1 | Fibroblast |
| Trove2        | 0.46 | 0.00 | 0.00 | 0.27 | 0.13 | 1 | Fibroblast |
| Tpm4          | 0.33 | 0.00 | 0.00 | 0.68 | 0.47 | 1 | Fibroblast |
| Rpl39         | 0.27 | 0.00 | 0.00 | 0.91 | 0.79 | 1 | Fibroblast |
| Hsbp1         | 0.43 | 0.00 | 0.00 | 0.48 | 0.30 | 1 | Fibroblast |
| Mettl7a1      | 0.29 | 0.00 | 0.00 | 0.39 | 0.20 | 1 | Fibroblast |
| Zbtb20        | 0.43 | 0.00 | 0.00 | 0.44 | 0.25 | 1 | Fibroblast |
| Sept7         | 0.32 | 0.00 | 0.00 | 0.75 | 0.57 | 1 | Fibroblast |
| Pebp1         | 0.42 | 0.00 | 0.00 | 0.41 | 0.24 | 1 | Fibroblast |

|           |      |      |      |      |      |   |            |
|-----------|------|------|------|------|------|---|------------|
| Atxn7l3b  | 0.39 | 0.00 | 0.00 | 0.57 | 0.39 | 1 | Fibroblast |
| Prdx2     | 0.39 | 0.00 | 0.00 | 0.50 | 0.32 | 1 | Fibroblast |
| Hist1h2bc | 0.43 | 0.00 | 0.00 | 0.26 | 0.13 | 1 | Fibroblast |
| Rcn1      | 0.41 | 0.00 | 0.00 | 0.27 | 0.13 | 1 | Fibroblast |
| Ndufc1    | 0.41 | 0.00 | 0.00 | 0.47 | 0.29 | 1 | Fibroblast |
| Mmp14     | 0.37 | 0.00 | 0.00 | 0.42 | 0.24 | 1 | Fibroblast |
| Romo1     | 0.39 | 0.00 | 0.00 | 0.46 | 0.29 | 1 | Fibroblast |
| Thra      | 0.41 | 0.00 | 0.00 | 0.31 | 0.16 | 1 | Fibroblast |
| Tcf12     | 0.44 | 0.00 | 0.00 | 0.31 | 0.16 | 1 | Fibroblast |
| Tsix      | 0.42 | 0.00 | 0.00 | 0.32 | 0.17 | 1 | Fibroblast |
| Nfia      | 0.38 | 0.00 | 0.00 | 0.39 | 0.23 | 1 | Fibroblast |
| Idh2      | 0.40 | 0.00 | 0.00 | 0.33 | 0.18 | 1 | Fibroblast |
| Gm10320   | 0.39 | 0.00 | 0.00 | 0.54 | 0.38 | 1 | Fibroblast |
| Cox8a     | 0.34 | 0.00 | 0.00 | 0.70 | 0.55 | 1 | Fibroblast |
| Gnas      | 0.26 | 0.00 | 0.00 | 0.81 | 0.66 | 1 | Fibroblast |
| Cox6a1    | 0.34 | 0.00 | 0.00 | 0.69 | 0.54 | 1 | Fibroblast |
| Eny2      | 0.41 | 0.00 | 0.00 | 0.37 | 0.22 | 1 | Fibroblast |
| Smim15    | 0.39 | 0.00 | 0.00 | 0.33 | 0.19 | 1 | Fibroblast |
| Cox7c     | 0.31 | 0.00 | 0.00 | 0.76 | 0.62 | 1 | Fibroblast |
| Plin2     | 0.30 | 0.00 | 0.00 | 0.25 | 0.12 | 1 | Fibroblast |
| Ssr1      | 0.38 | 0.00 | 0.00 | 0.39 | 0.23 | 1 | Fibroblast |
| Sqstm1    | 0.35 | 0.00 | 0.00 | 0.47 | 0.31 | 1 | Fibroblast |
| Parva     | 0.38 | 0.00 | 0.00 | 0.28 | 0.15 | 1 | Fibroblast |
| Gstp2     | 0.35 | 0.00 | 0.00 | 0.30 | 0.16 | 1 | Fibroblast |
| Gstp1     | 0.35 | 0.00 | 0.00 | 0.33 | 0.18 | 1 | Fibroblast |
| mt-Nd5    | 0.26 | 0.00 | 0.00 | 0.87 | 0.75 | 1 | Fibroblast |
| Nr3c1     | 0.38 | 0.00 | 0.00 | 0.39 | 0.24 | 1 | Fibroblast |
| Uqcrb     | 0.33 | 0.00 | 0.00 | 0.58 | 0.43 | 1 | Fibroblast |
| Tmem204   | 0.27 | 0.00 | 0.00 | 0.28 | 0.15 | 1 | Fibroblast |
| Cfdp1     | 0.34 | 0.00 | 0.00 | 0.53 | 0.37 | 1 | Fibroblast |
| Ndufb9    | 0.35 | 0.00 | 0.00 | 0.51 | 0.36 | 1 | Fibroblast |
| Emc2      | 0.36 | 0.00 | 0.00 | 0.26 | 0.14 | 1 | Fibroblast |
| Comt      | 0.38 | 0.00 | 0.00 | 0.26 | 0.14 | 1 | Fibroblast |
| Mtss1     | 0.36 | 0.00 | 0.00 | 0.26 | 0.14 | 1 | Fibroblast |
| Ostc      | 0.35 | 0.00 | 0.00 | 0.36 | 0.22 | 1 | Fibroblast |
| Abrac1    | 0.33 | 0.00 | 0.00 | 0.36 | 0.22 | 1 | Fibroblast |
| Nktr      | 0.33 | 0.00 | 0.00 | 0.51 | 0.35 | 1 | Fibroblast |
| Mprip     | 0.37 | 0.00 | 0.00 | 0.33 | 0.20 | 1 | Fibroblast |
| Fus       | 0.31 | 0.00 | 0.00 | 0.62 | 0.47 | 1 | Fibroblast |
| lfrd1     | 0.38 | 0.00 | 0.00 | 0.27 | 0.15 | 1 | Fibroblast |
| Eif4a2    | 0.34 | 0.00 | 0.00 | 0.46 | 0.31 | 1 | Fibroblast |
| Tmem176b  | 0.31 | 0.00 | 0.00 | 0.49 | 0.33 | 1 | Fibroblast |
| Marcks1   | 0.29 | 0.00 | 0.00 | 0.32 | 0.19 | 1 | Fibroblast |

|               |      |      |      |      |      |   |            |
|---------------|------|------|------|------|------|---|------------|
| Zranb2        | 0.35 | 0.00 | 0.00 | 0.38 | 0.24 | 1 | Fibroblast |
| Gm15013       | 0.35 | 0.00 | 0.00 | 0.50 | 0.36 | 1 | Fibroblast |
| Cox7b         | 0.33 | 0.00 | 0.00 | 0.59 | 0.46 | 1 | Fibroblast |
| Kctd10        | 0.34 | 0.00 | 0.00 | 0.26 | 0.14 | 1 | Fibroblast |
| Son           | 0.26 | 0.00 | 0.00 | 0.83 | 0.72 | 1 | Fibroblast |
| Gm9847        | 0.32 | 0.00 | 0.00 | 0.27 | 0.15 | 1 | Fibroblast |
| Sept15        | 0.31 | 0.00 | 0.00 | 0.48 | 0.33 | 1 | Fibroblast |
| Atp5g1        | 0.34 | 0.00 | 0.00 | 0.34 | 0.21 | 1 | Fibroblast |
| Hmgn5         | 0.39 | 0.00 | 0.00 | 0.39 | 0.25 | 1 | Fibroblast |
| Atp5e         | 0.28 | 0.00 | 0.00 | 0.64 | 0.49 | 1 | Fibroblast |
| Chd3          | 0.32 | 0.00 | 0.00 | 0.30 | 0.18 | 1 | Fibroblast |
| Gm21092       | 0.33 | 0.00 | 0.00 | 0.31 | 0.19 | 1 | Fibroblast |
| Mpc2          | 0.32 | 0.00 | 0.00 | 0.36 | 0.23 | 1 | Fibroblast |
| Eef1g         | 0.26 | 0.00 | 0.00 | 0.63 | 0.47 | 1 | Fibroblast |
| Calu          | 0.29 | 0.00 | 0.00 | 0.36 | 0.23 | 1 | Fibroblast |
| Eml4          | 0.32 | 0.00 | 0.00 | 0.29 | 0.17 | 1 | Fibroblast |
| Arf4          | 0.31 | 0.00 | 0.00 | 0.40 | 0.26 | 1 | Fibroblast |
| Ndufb3        | 0.32 | 0.00 | 0.00 | 0.44 | 0.30 | 1 | Fibroblast |
| Ndufb6        | 0.32 | 0.00 | 0.00 | 0.35 | 0.22 | 1 | Fibroblast |
| Uqcr10        | 0.30 | 0.00 | 0.00 | 0.49 | 0.35 | 1 | Fibroblast |
| Nfix          | 0.30 | 0.00 | 0.00 | 0.28 | 0.16 | 1 | Fibroblast |
| Mrfap1        | 0.30 | 0.00 | 0.00 | 0.46 | 0.32 | 1 | Fibroblast |
| Pdcd4         | 0.27 | 0.00 | 0.00 | 0.35 | 0.22 | 1 | Fibroblast |
| Tbl1x         | 0.31 | 0.00 | 0.00 | 0.37 | 0.24 | 1 | Fibroblast |
| Mtus1         | 0.29 | 0.00 | 0.00 | 0.28 | 0.16 | 1 | Fibroblast |
| Tceal8        | 0.31 | 0.00 | 0.00 | 0.30 | 0.19 | 1 | Fibroblast |
| Cox6b1        | 0.26 | 0.00 | 0.00 | 0.70 | 0.56 | 1 | Fibroblast |
| Csnk1a1       | 0.26 | 0.00 | 0.00 | 0.66 | 0.53 | 1 | Fibroblast |
| Hnrnph1       | 0.27 | 0.00 | 0.00 | 0.52 | 0.37 | 1 | Fibroblast |
| Myo1b         | 0.29 | 0.00 | 0.00 | 0.27 | 0.16 | 1 | Fibroblast |
| Ppib          | 0.27 | 0.00 | 0.00 | 0.56 | 0.42 | 1 | Fibroblast |
| Psmc5         | 0.32 | 0.00 | 0.00 | 0.34 | 0.22 | 1 | Fibroblast |
| Snrpd2        | 0.29 | 0.00 | 0.00 | 0.37 | 0.24 | 1 | Fibroblast |
| Ndufv3        | 0.34 | 0.00 | 0.00 | 0.35 | 0.23 | 1 | Fibroblast |
| Pdia4         | 0.30 | 0.00 | 0.00 | 0.32 | 0.20 | 1 | Fibroblast |
| Ndufa5        | 0.29 | 0.00 | 0.00 | 0.37 | 0.25 | 1 | Fibroblast |
| 9530068E07Rik | 0.30 | 0.00 | 0.00 | 0.27 | 0.17 | 1 | Fibroblast |
| Cul1          | 0.32 | 0.00 | 0.00 | 0.28 | 0.18 | 1 | Fibroblast |
| Ndufb11       | 0.28 | 0.00 | 0.00 | 0.45 | 0.33 | 1 | Fibroblast |
| Ier3ip1       | 0.27 | 0.00 | 0.00 | 0.42 | 0.29 | 1 | Fibroblast |
| Pura          | 0.30 | 0.00 | 0.00 | 0.31 | 0.20 | 1 | Fibroblast |
| 1110004F10Rik | 0.27 | 0.00 | 0.00 | 0.40 | 0.28 | 1 | Fibroblast |
| Kif1b         | 0.31 | 0.00 | 0.00 | 0.34 | 0.23 | 1 | Fibroblast |

|               |      |      |      |      |      |   |              |
|---------------|------|------|------|------|------|---|--------------|
| Pdap1         | 0.25 | 0.00 | 0.00 | 0.57 | 0.44 | 1 | Fibroblast   |
| Acaa2         | 0.30 | 0.00 | 0.00 | 0.26 | 0.16 | 1 | Fibroblast   |
| Gm6483        | 0.28 | 0.00 | 0.00 | 0.27 | 0.16 | 1 | Fibroblast   |
| Pfdn5         | 0.25 | 0.00 | 0.00 | 0.61 | 0.49 | 1 | Fibroblast   |
| Atp5k         | 0.29 | 0.00 | 0.00 | 0.43 | 0.31 | 1 | Fibroblast   |
| Smim11        | 0.29 | 0.00 | 0.00 | 0.28 | 0.17 | 1 | Fibroblast   |
| Slirp         | 0.27 | 0.00 | 0.00 | 0.32 | 0.21 | 1 | Fibroblast   |
| Ndufb2        | 0.28 | 0.00 | 0.00 | 0.31 | 0.20 | 1 | Fibroblast   |
| Srpk2         | 0.28 | 0.00 | 0.00 | 0.25 | 0.15 | 1 | Fibroblast   |
| Atp5j2        | 0.25 | 0.00 | 0.00 | 0.55 | 0.43 | 1 | Fibroblast   |
| 2410015M20Rik | 0.29 | 0.00 | 0.00 | 0.33 | 0.22 | 1 | Fibroblast   |
| Hdlbp         | 0.30 | 0.00 | 0.00 | 0.30 | 0.20 | 1 | Fibroblast   |
| Smarcc2       | 0.29 | 0.00 | 0.00 | 0.26 | 0.16 | 1 | Fibroblast   |
| Htatsf1       | 0.29 | 0.00 | 0.00 | 0.36 | 0.26 | 1 | Fibroblast   |
| Sar1a         | 0.29 | 0.00 | 0.00 | 0.30 | 0.20 | 1 | Fibroblast   |
| Lamp2         | 0.26 | 0.00 | 0.00 | 0.37 | 0.26 | 1 | Fibroblast   |
| Swi5          | 0.27 | 0.00 | 0.00 | 0.37 | 0.26 | 1 | Fibroblast   |
| Pdia3         | 0.25 | 0.00 | 0.00 | 0.55 | 0.43 | 1 | Fibroblast   |
| Cox20         | 0.27 | 0.00 | 0.00 | 0.27 | 0.17 | 1 | Fibroblast   |
| Ube2a         | 0.31 | 0.00 | 0.00 | 0.27 | 0.18 | 1 | Fibroblast   |
| Sec61g        | 0.27 | 0.00 | 0.00 | 0.45 | 0.34 | 1 | Fibroblast   |
| Ing4          | 0.27 | 0.00 | 0.00 | 0.32 | 0.21 | 1 | Fibroblast   |
| Mrpl52        | 0.25 | 0.00 | 0.00 | 0.43 | 0.32 | 1 | Fibroblast   |
| Mocs2         | 0.25 | 0.00 | 0.00 | 0.29 | 0.19 | 1 | Fibroblast   |
| Copb2         | 0.28 | 0.00 | 0.00 | 0.27 | 0.17 | 1 | Fibroblast   |
| Pdia6         | 0.26 | 0.00 | 0.00 | 0.40 | 0.29 | 1 | Fibroblast   |
| Bccip         | 0.26 | 0.00 | 0.00 | 0.29 | 0.20 | 1 | Fibroblast   |
| Anapc13       | 0.27 | 0.00 | 0.00 | 0.30 | 0.21 | 1 | Fibroblast   |
| Ufc1          | 0.25 | 0.00 | 0.00 | 0.26 | 0.18 | 1 | Fibroblast   |
| Aspn          | 2.90 | 0.00 | 0.00 | 0.48 | 0.07 | 2 | Stromal Cell |
| Tgfb1         | 2.66 | 0.00 | 0.00 | 0.97 | 0.13 | 2 | Stromal Cell |
| Tnc           | 2.25 | 0.00 | 0.00 | 0.84 | 0.08 | 2 | Stromal Cell |
| Htra1         | 2.13 | 0.00 | 0.00 | 0.62 | 0.04 | 2 | Stromal Cell |
| P2ry14        | 2.07 | 0.00 | 0.00 | 0.71 | 0.03 | 2 | Stromal Cell |
| Tagln         | 1.97 | 0.00 | 0.00 | 0.77 | 0.10 | 2 | Stromal Cell |
| Loxl2         | 1.96 | 0.00 | 0.00 | 0.72 | 0.09 | 2 | Stromal Cell |
| Igf1          | 1.94 | 0.00 | 0.00 | 0.72 | 0.09 | 2 | Stromal Cell |
| Myh11         | 1.93 | 0.00 | 0.00 | 0.74 | 0.06 | 2 | Stromal Cell |
| Wnt5a         | 1.92 | 0.00 | 0.00 | 0.67 | 0.06 | 2 | Stromal Cell |
| Prss35        | 1.92 | 0.00 | 0.00 | 0.59 | 0.03 | 2 | Stromal Cell |
| Acta2         | 1.89 | 0.00 | 0.00 | 0.85 | 0.14 | 2 | Stromal Cell |
| Agt           | 1.89 | 0.00 | 0.00 | 0.71 | 0.05 | 2 | Stromal Cell |
| Ltbp2         | 1.84 | 0.00 | 0.00 | 0.65 | 0.05 | 2 | Stromal Cell |

|                |      |      |      |      |      |   |              |
|----------------|------|------|------|------|------|---|--------------|
| Filip1l        | 1.78 | 0.00 | 0.00 | 0.87 | 0.29 | 2 | Stromal Cell |
| Fstl1          | 1.73 | 0.00 | 0.00 | 0.98 | 0.40 | 2 | Stromal Cell |
| Serpine2       | 1.72 | 0.00 | 0.00 | 0.81 | 0.21 | 2 | Stromal Cell |
| Cald1          | 1.71 | 0.00 | 0.00 | 0.95 | 0.37 | 2 | Stromal Cell |
| Net1           | 1.69 | 0.00 | 0.00 | 0.64 | 0.14 | 2 | Stromal Cell |
| Col3a1         | 1.67 | 0.00 | 0.00 | 0.98 | 0.28 | 2 | Stromal Cell |
| Pdlim3         | 1.67 | 0.00 | 0.00 | 0.55 | 0.03 | 2 | Stromal Cell |
| Actg2          | 1.66 | 0.00 | 0.00 | 0.52 | 0.04 | 2 | Stromal Cell |
| Egfm1          | 1.63 | 0.00 | 0.00 | 0.53 | 0.02 | 2 | Stromal Cell |
| Spon2          | 1.61 | 0.00 | 0.00 | 0.53 | 0.03 | 2 | Stromal Cell |
| RP23-103112.13 | 1.61 | 0.00 | 0.00 | 0.57 | 0.06 | 2 | Stromal Cell |
| Lgals1         | 1.58 | 0.00 | 0.00 | 0.96 | 0.37 | 2 | Stromal Cell |
| Mustn1         | 1.53 | 0.00 | 0.00 | 0.49 | 0.04 | 2 | Stromal Cell |
| Nrep           | 1.49 | 0.00 | 0.00 | 0.93 | 0.39 | 2 | Stromal Cell |
| Nes            | 1.48 | 0.00 | 0.00 | 0.70 | 0.18 | 2 | Stromal Cell |
| Pde5a          | 1.45 | 0.00 | 0.00 | 0.58 | 0.08 | 2 | Stromal Cell |
| Sdc2           | 1.43 | 0.00 | 0.00 | 0.59 | 0.09 | 2 | Stromal Cell |
| Olfml2b        | 1.42 | 0.00 | 0.00 | 0.45 | 0.03 | 2 | Stromal Cell |
| Ckb            | 1.40 | 0.00 | 0.00 | 0.59 | 0.11 | 2 | Stromal Cell |
| Mdk            | 1.37 | 0.00 | 0.00 | 0.70 | 0.15 | 2 | Stromal Cell |
| Car2           | 1.34 | 0.00 | 0.00 | 0.72 | 0.27 | 2 | Stromal Cell |
| Des            | 1.33 | 0.00 | 0.00 | 0.41 | 0.03 | 2 | Stromal Cell |
| Gpr64          | 1.32 | 0.00 | 0.00 | 0.36 | 0.03 | 2 | Stromal Cell |
| Thbs1          | 1.31 | 0.00 | 0.00 | 0.50 | 0.10 | 2 | Stromal Cell |
| Tpm2           | 1.31 | 0.00 | 0.00 | 0.60 | 0.10 | 2 | Stromal Cell |
| Cd248          | 1.29 | 0.00 | 0.00 | 0.38 | 0.02 | 2 | Stromal Cell |
| Eln            | 1.27 | 0.00 | 0.00 | 0.50 | 0.13 | 2 | Stromal Cell |
| Myl9           | 1.26 | 0.00 | 0.00 | 0.56 | 0.09 | 2 | Stromal Cell |
| Tpm1           | 1.25 | 0.00 | 0.00 | 0.92 | 0.49 | 2 | Stromal Cell |
| Tgfb2          | 1.25 | 0.00 | 0.00 | 0.51 | 0.11 | 2 | Stromal Cell |
| Col1a2         | 1.23 | 0.00 | 0.00 | 0.99 | 0.35 | 2 | Stromal Cell |
| Myh10          | 1.21 | 0.00 | 0.00 | 0.68 | 0.19 | 2 | Stromal Cell |
| Mylk           | 1.21 | 0.00 | 0.00 | 0.75 | 0.24 | 2 | Stromal Cell |
| 6330403K07Rik  | 1.20 | 0.00 | 0.00 | 0.38 | 0.02 | 2 | Stromal Cell |
| Dkk3           | 1.19 | 0.00 | 0.00 | 0.51 | 0.09 | 2 | Stromal Cell |
| Bgn            | 1.19 | 0.00 | 0.00 | 0.73 | 0.20 | 2 | Stromal Cell |
| Col5a1         | 1.18 | 0.00 | 0.00 | 0.45 | 0.06 | 2 | Stromal Cell |
| Fndc1          | 1.17 | 0.00 | 0.00 | 0.37 | 0.03 | 2 | Stromal Cell |
| Hlf            | 1.16 | 0.00 | 0.00 | 0.34 | 0.03 | 2 | Stromal Cell |
| Lsp1           | 1.16 | 0.00 | 0.00 | 0.56 | 0.16 | 2 | Stromal Cell |
| Mfap2          | 1.15 | 0.00 | 0.00 | 0.82 | 0.31 | 2 | Stromal Cell |
| Robo2          | 1.15 | 0.00 | 0.00 | 0.41 | 0.07 | 2 | Stromal Cell |
| Igfbp5         | 1.15 | 0.00 | 0.00 | 0.40 | 0.08 | 2 | Stromal Cell |

|          |      |      |      |      |      |   |              |
|----------|------|------|------|------|------|---|--------------|
| Lpar1    | 1.15 | 0.00 | 0.00 | 0.35 | 0.05 | 2 | Stromal Cell |
| Pdgfra   | 1.14 | 0.00 | 0.00 | 0.34 | 0.04 | 2 | Stromal Cell |
| C1qtnf7  | 1.12 | 0.00 | 0.00 | 0.41 | 0.07 | 2 | Stromal Cell |
| Pamr1    | 1.11 | 0.00 | 0.00 | 0.31 | 0.03 | 2 | Stromal Cell |
| Map1b    | 1.10 | 0.00 | 0.00 | 0.40 | 0.08 | 2 | Stromal Cell |
| Rcn3     | 1.08 | 0.00 | 0.00 | 0.50 | 0.10 | 2 | Stromal Cell |
| Fam129a  | 1.08 | 0.00 | 0.00 | 0.38 | 0.06 | 2 | Stromal Cell |
| Hmcn1    | 1.06 | 0.00 | 0.00 | 0.41 | 0.12 | 2 | Stromal Cell |
| Pam      | 1.04 | 0.00 | 0.00 | 0.47 | 0.15 | 2 | Stromal Cell |
| Fbn1     | 1.03 | 0.00 | 0.00 | 0.55 | 0.14 | 2 | Stromal Cell |
| Adamts2  | 1.03 | 0.00 | 0.00 | 0.38 | 0.08 | 2 | Stromal Cell |
| Tgfb3    | 1.02 | 0.00 | 0.00 | 0.31 | 0.03 | 2 | Stromal Cell |
| Palld    | 1.00 | 0.00 | 0.00 | 0.55 | 0.15 | 2 | Stromal Cell |
| Mgp      | 1.00 | 0.00 | 0.00 | 0.71 | 0.29 | 2 | Stromal Cell |
| Angptl2  | 0.99 | 0.00 | 0.00 | 0.29 | 0.02 | 2 | Stromal Cell |
| Col1a1   | 0.99 | 0.00 | 0.00 | 0.78 | 0.22 | 2 | Stromal Cell |
| Cygb     | 0.98 | 0.00 | 0.00 | 0.32 | 0.04 | 2 | Stromal Cell |
| Socs2    | 0.98 | 0.00 | 0.00 | 0.72 | 0.31 | 2 | Stromal Cell |
| Col27a1  | 0.97 | 0.00 | 0.00 | 0.30 | 0.04 | 2 | Stromal Cell |
| Lhfp     | 0.97 | 0.00 | 0.00 | 0.50 | 0.13 | 2 | Stromal Cell |
| Creb3l2  | 0.96 | 0.00 | 0.00 | 0.41 | 0.11 | 2 | Stromal Cell |
| Tshz2    | 0.96 | 0.00 | 0.00 | 0.36 | 0.07 | 2 | Stromal Cell |
| Rarres2  | 0.95 | 0.00 | 0.00 | 0.47 | 0.11 | 2 | Stromal Cell |
| Ddr2     | 0.94 | 0.00 | 0.00 | 0.29 | 0.04 | 2 | Stromal Cell |
| Lhfp12   | 0.94 | 0.00 | 0.00 | 0.35 | 0.07 | 2 | Stromal Cell |
| Tenm4    | 0.93 | 0.00 | 0.00 | 0.27 | 0.02 | 2 | Stromal Cell |
| Rbms3    | 0.92 | 0.00 | 0.00 | 0.47 | 0.15 | 2 | Stromal Cell |
| Itga9    | 0.92 | 0.00 | 0.00 | 0.36 | 0.07 | 2 | Stromal Cell |
| Serpinh1 | 0.92 | 0.00 | 0.00 | 0.76 | 0.36 | 2 | Stromal Cell |
| Samd4    | 0.91 | 0.00 | 0.00 | 0.32 | 0.07 | 2 | Stromal Cell |
| Grb10    | 0.91 | 0.00 | 0.00 | 0.46 | 0.14 | 2 | Stromal Cell |
| Col5a2   | 0.91 | 0.00 | 0.00 | 0.49 | 0.15 | 2 | Stromal Cell |
| Col6a3   | 0.91 | 0.00 | 0.00 | 0.37 | 0.08 | 2 | Stromal Cell |
| Nfib     | 0.91 | 0.00 | 0.00 | 0.83 | 0.44 | 2 | Stromal Cell |
| Golim4   | 0.90 | 0.00 | 0.00 | 0.49 | 0.18 | 2 | Stromal Cell |
| Nnat     | 0.90 | 0.00 | 0.00 | 0.29 | 0.06 | 2 | Stromal Cell |
| Pdzrn3   | 0.89 | 0.00 | 0.00 | 0.29 | 0.04 | 2 | Stromal Cell |
| Plat     | 0.88 | 0.00 | 0.00 | 0.26 | 0.04 | 2 | Stromal Cell |
| Calu     | 0.87 | 0.00 | 0.00 | 0.55 | 0.22 | 2 | Stromal Cell |
| Gpc4     | 0.87 | 0.00 | 0.00 | 0.26 | 0.03 | 2 | Stromal Cell |
| Mxra7    | 0.87 | 0.00 | 0.00 | 0.41 | 0.12 | 2 | Stromal Cell |
| Postn    | 0.87 | 0.00 | 0.00 | 0.33 | 0.06 | 2 | Stromal Cell |
| Sox4     | 0.86 | 0.00 | 0.00 | 0.71 | 0.34 | 2 | Stromal Cell |

|         |      |      |      |      |      |   |              |
|---------|------|------|------|------|------|---|--------------|
| Anxa5   | 0.85 | 0.00 | 0.00 | 0.70 | 0.38 | 2 | Stromal Cell |
| Pdgfrl  | 0.85 | 0.00 | 0.00 | 0.25 | 0.02 | 2 | Stromal Cell |
| Etv1    | 0.85 | 0.00 | 0.00 | 0.29 | 0.06 | 2 | Stromal Cell |
| Cnn3    | 0.84 | 0.00 | 0.00 | 0.65 | 0.27 | 2 | Stromal Cell |
| Mmp14   | 0.82 | 0.00 | 0.00 | 0.55 | 0.23 | 2 | Stromal Cell |
| Leprel2 | 0.81 | 0.00 | 0.00 | 0.30 | 0.06 | 2 | Stromal Cell |
| Selm    | 0.79 | 0.00 | 0.00 | 0.32 | 0.07 | 2 | Stromal Cell |
| Nexn    | 0.79 | 0.00 | 0.00 | 0.55 | 0.19 | 2 | Stromal Cell |
| Sparc   | 0.78 | 0.00 | 0.00 | 0.99 | 0.71 | 2 | Stromal Cell |
| Gpr126  | 0.78 | 0.00 | 0.00 | 0.34 | 0.09 | 2 | Stromal Cell |
| Col16a1 | 0.76 | 0.00 | 0.00 | 0.25 | 0.04 | 2 | Stromal Cell |
| Gm13889 | 0.75 | 0.00 | 0.00 | 0.27 | 0.05 | 2 | Stromal Cell |
| Pros1   | 0.75 | 0.00 | 0.00 | 0.32 | 0.08 | 2 | Stromal Cell |
| Cd44    | 0.73 | 0.00 | 0.00 | 0.49 | 0.18 | 2 | Stromal Cell |
| Prdm6   | 0.69 | 0.00 | 0.00 | 0.26 | 0.05 | 2 | Stromal Cell |
| Plac9a  | 0.67 | 0.00 | 0.00 | 0.71 | 0.27 | 2 | Stromal Cell |
| Plac9b  | 0.64 | 0.00 | 0.00 | 0.71 | 0.27 | 2 | Stromal Cell |
| Mex3a   | 0.71 | 0.00 | 0.00 | 0.28 | 0.07 | 2 | Stromal Cell |
| Hsp90b1 | 0.59 | 0.00 | 0.00 | 0.92 | 0.75 | 2 | Stromal Cell |
| Ghr     | 0.82 | 0.00 | 0.00 | 0.39 | 0.13 | 2 | Stromal Cell |
| Smtn    | 0.67 | 0.00 | 0.00 | 0.27 | 0.07 | 2 | Stromal Cell |
| Ism1    | 0.70 | 0.00 | 0.00 | 0.29 | 0.07 | 2 | Stromal Cell |
| Fkbp7   | 0.75 | 0.00 | 0.00 | 0.37 | 0.12 | 2 | Stromal Cell |
| Sema3c  | 0.67 | 0.00 | 0.00 | 0.49 | 0.18 | 2 | Stromal Cell |
| Prnp    | 0.89 | 0.00 | 0.00 | 0.34 | 0.10 | 2 | Stromal Cell |
| ligp1   | 0.75 | 0.00 | 0.00 | 0.37 | 0.12 | 2 | Stromal Cell |
| Rgs2    | 0.78 | 0.00 | 0.00 | 0.58 | 0.26 | 2 | Stromal Cell |
| Mmp2    | 0.67 | 0.00 | 0.00 | 0.38 | 0.12 | 2 | Stromal Cell |
| Egflam  | 0.67 | 0.00 | 0.00 | 0.27 | 0.07 | 2 | Stromal Cell |
| Itgb1   | 0.61 | 0.00 | 0.00 | 0.86 | 0.61 | 2 | Stromal Cell |
| Ctgf    | 0.85 | 0.00 | 0.00 | 0.27 | 0.07 | 2 | Stromal Cell |
| Timp2   | 0.76 | 0.00 | 0.00 | 0.48 | 0.19 | 2 | Stromal Cell |
| Gm9847  | 0.79 | 0.00 | 0.00 | 0.40 | 0.14 | 2 | Stromal Cell |
| Loxl1   | 0.76 | 0.00 | 0.00 | 0.32 | 0.09 | 2 | Stromal Cell |
| Pmepa1  | 0.78 | 0.00 | 0.00 | 0.32 | 0.09 | 2 | Stromal Cell |
| Celf2   | 0.77 | 0.00 | 0.00 | 0.56 | 0.26 | 2 | Stromal Cell |
| Adam19  | 0.69 | 0.00 | 0.00 | 0.29 | 0.08 | 2 | Stromal Cell |
| Lpp     | 0.79 | 0.00 | 0.00 | 0.47 | 0.20 | 2 | Stromal Cell |
| Gm26735 | 0.77 | 0.00 | 0.00 | 0.44 | 0.17 | 2 | Stromal Cell |
| Zeb2    | 0.67 | 0.00 | 0.00 | 0.60 | 0.29 | 2 | Stromal Cell |
| Gja1    | 1.13 | 0.00 | 0.00 | 0.27 | 0.08 | 2 | Stromal Cell |
| Pdlim7  | 0.67 | 0.00 | 0.00 | 0.30 | 0.09 | 2 | Stromal Cell |
| Calm2   | 0.59 | 0.00 | 0.00 | 0.85 | 0.63 | 2 | Stromal Cell |

|          |      |      |      |      |      |   |              |
|----------|------|------|------|------|------|---|--------------|
| Tbx5     | 0.56 | 0.00 | 0.00 | 0.26 | 0.07 | 2 | Stromal Cell |
| Tpm4     | 0.64 | 0.00 | 0.00 | 0.74 | 0.47 | 2 | Stromal Cell |
| Lmna     | 0.75 | 0.00 | 0.00 | 0.45 | 0.18 | 2 | Stromal Cell |
| Rcn1     | 0.68 | 0.00 | 0.00 | 0.36 | 0.12 | 2 | Stromal Cell |
| Ppic     | 0.65 | 0.00 | 0.00 | 0.65 | 0.36 | 2 | Stromal Cell |
| Gpm6b    | 0.63 | 0.00 | 0.00 | 0.31 | 0.10 | 2 | Stromal Cell |
| Rora     | 0.78 | 0.00 | 0.00 | 0.29 | 0.09 | 2 | Stromal Cell |
| P4hb     | 0.66 | 0.00 | 0.00 | 0.65 | 0.38 | 2 | Stromal Cell |
| Tgfb1i1  | 0.61 | 0.00 | 0.00 | 0.34 | 0.12 | 2 | Stromal Cell |
| Tuba1a   | 0.56 | 0.00 | 0.00 | 0.76 | 0.49 | 2 | Stromal Cell |
| Flna     | 0.67 | 0.00 | 0.00 | 0.48 | 0.21 | 2 | Stromal Cell |
| Myl6     | 0.54 | 0.00 | 0.00 | 0.84 | 0.68 | 2 | Stromal Cell |
| Adamts10 | 0.66 | 0.00 | 0.00 | 0.30 | 0.10 | 2 | Stromal Cell |
| Pxdn     | 0.63 | 0.00 | 0.00 | 0.29 | 0.09 | 2 | Stromal Cell |
| Serf1    | 0.63 | 0.00 | 0.00 | 0.29 | 0.10 | 2 | Stromal Cell |
| Lamb1    | 0.64 | 0.00 | 0.00 | 0.37 | 0.14 | 2 | Stromal Cell |
| Ptma     | 0.37 | 0.00 | 0.00 | 0.97 | 0.90 | 2 | Stromal Cell |
| Ctsl     | 0.57 | 0.00 | 0.00 | 0.65 | 0.37 | 2 | Stromal Cell |
| Col6a1   | 0.61 | 0.00 | 0.00 | 0.42 | 0.17 | 2 | Stromal Cell |
| Ryk      | 0.67 | 0.00 | 0.00 | 0.31 | 0.11 | 2 | Stromal Cell |
| MLlt3    | 0.68 | 0.00 | 0.00 | 0.29 | 0.10 | 2 | Stromal Cell |
| Rrbp1    | 0.60 | 0.00 | 0.00 | 0.77 | 0.53 | 2 | Stromal Cell |
| Tspan3   | 0.64 | 0.00 | 0.00 | 0.36 | 0.14 | 2 | Stromal Cell |
| Cd81     | 0.54 | 0.00 | 0.00 | 0.66 | 0.39 | 2 | Stromal Cell |
| Fndc3b   | 0.64 | 0.00 | 0.00 | 0.30 | 0.10 | 2 | Stromal Cell |
| Lama4    | 0.63 | 0.00 | 0.00 | 0.32 | 0.12 | 2 | Stromal Cell |
| Maged2   | 0.57 | 0.00 | 0.00 | 0.38 | 0.16 | 2 | Stromal Cell |
| Snai2    | 0.62 | 0.00 | 0.00 | 0.31 | 0.11 | 2 | Stromal Cell |
| Col6a2   | 0.56 | 0.00 | 0.00 | 0.34 | 0.13 | 2 | Stromal Cell |
| Cd63     | 0.54 | 0.00 | 0.00 | 0.54 | 0.28 | 2 | Stromal Cell |
| Ttc3     | 0.66 | 0.00 | 0.00 | 0.51 | 0.27 | 2 | Stromal Cell |
| Ilk      | 0.61 | 0.00 | 0.00 | 0.44 | 0.21 | 2 | Stromal Cell |
| Csrp2    | 0.59 | 0.00 | 0.00 | 0.37 | 0.15 | 2 | Stromal Cell |
| Actn1    | 0.66 | 0.00 | 0.00 | 0.43 | 0.21 | 2 | Stromal Cell |
| Amotl1   | 0.68 | 0.00 | 0.00 | 0.34 | 0.15 | 2 | Stromal Cell |
| Cst3     | 0.31 | 0.00 | 0.00 | 0.80 | 0.57 | 2 | Stromal Cell |
| Mxra8    | 0.51 | 0.00 | 0.00 | 0.36 | 0.15 | 2 | Stromal Cell |
| Nfix     | 0.63 | 0.00 | 0.00 | 0.36 | 0.16 | 2 | Stromal Cell |
| Cyr61    | 0.53 | 0.00 | 0.00 | 0.30 | 0.11 | 2 | Stromal Cell |
| Tshz1    | 0.62 | 0.00 | 0.00 | 0.29 | 0.11 | 2 | Stromal Cell |
| Nedd4    | 0.50 | 0.00 | 0.00 | 0.75 | 0.52 | 2 | Stromal Cell |
| Gpx8     | 0.57 | 0.00 | 0.00 | 0.32 | 0.13 | 2 | Stromal Cell |
| Atpif1   | 0.50 | 0.00 | 0.00 | 0.73 | 0.51 | 2 | Stromal Cell |

|          |      |      |      |      |      |   |              |
|----------|------|------|------|------|------|---|--------------|
| Phldb2   | 0.61 | 0.00 | 0.00 | 0.51 | 0.28 | 2 | Stromal Cell |
| Fgfr1    | 0.56 | 0.00 | 0.00 | 0.27 | 0.10 | 2 | Stromal Cell |
| Rcn2     | 0.59 | 0.00 | 0.00 | 0.32 | 0.14 | 2 | Stromal Cell |
| Arf4     | 0.57 | 0.00 | 0.00 | 0.47 | 0.26 | 2 | Stromal Cell |
| Antxr1   | 0.53 | 0.00 | 0.00 | 0.28 | 0.11 | 2 | Stromal Cell |
| Vim      | 0.38 | 0.00 | 0.00 | 0.89 | 0.64 | 2 | Stromal Cell |
| Ccnd2    | 0.65 | 0.00 | 0.00 | 0.48 | 0.27 | 2 | Stromal Cell |
| Tjp2     | 0.63 | 0.00 | 0.00 | 0.33 | 0.15 | 2 | Stromal Cell |
| Minos1   | 0.53 | 0.00 | 0.00 | 0.63 | 0.43 | 2 | Stromal Cell |
| Slc25a4  | 0.47 | 0.00 | 0.00 | 0.69 | 0.49 | 2 | Stromal Cell |
| Dstn     | 0.47 | 0.00 | 0.00 | 0.71 | 0.49 | 2 | Stromal Cell |
| Maged1   | 0.54 | 0.00 | 0.00 | 0.36 | 0.17 | 2 | Stromal Cell |
| Mapre2   | 0.50 | 0.00 | 0.00 | 0.25 | 0.10 | 2 | Stromal Cell |
| Fam115a  | 0.55 | 0.00 | 0.00 | 0.30 | 0.13 | 2 | Stromal Cell |
| Hmgn1    | 0.47 | 0.00 | 0.00 | 0.65 | 0.44 | 2 | Stromal Cell |
| Anxa6    | 0.52 | 0.00 | 0.00 | 0.38 | 0.19 | 2 | Stromal Cell |
| Picalm   | 0.60 | 0.00 | 0.00 | 0.38 | 0.20 | 2 | Stromal Cell |
| Parva    | 0.52 | 0.00 | 0.00 | 0.32 | 0.15 | 2 | Stromal Cell |
| mt-Nd1   | 0.28 | 0.00 | 0.00 | 0.97 | 0.91 | 2 | Stromal Cell |
| Fkbp9    | 0.47 | 0.00 | 0.00 | 0.29 | 0.13 | 2 | Stromal Cell |
| Ckap4    | 0.53 | 0.00 | 0.00 | 0.35 | 0.17 | 2 | Stromal Cell |
| Tbx2     | 0.44 | 0.00 | 0.00 | 0.27 | 0.11 | 2 | Stromal Cell |
| Hspa5    | 0.46 | 0.00 | 0.00 | 0.73 | 0.54 | 2 | Stromal Cell |
| Tsc22d1  | 0.49 | 0.00 | 0.00 | 0.53 | 0.32 | 2 | Stromal Cell |
| Cdk4     | 0.53 | 0.00 | 0.00 | 0.42 | 0.23 | 2 | Stromal Cell |
| Cgnl1    | 0.55 | 0.00 | 0.00 | 0.26 | 0.11 | 2 | Stromal Cell |
| Laptn4a  | 0.41 | 0.00 | 0.00 | 0.70 | 0.50 | 2 | Stromal Cell |
| Atp2b1   | 0.45 | 0.00 | 0.00 | 0.73 | 0.57 | 2 | Stromal Cell |
| Mpzl1    | 0.46 | 0.00 | 0.00 | 0.25 | 0.10 | 2 | Stromal Cell |
| Morf4l2  | 0.53 | 0.00 | 0.00 | 0.39 | 0.21 | 2 | Stromal Cell |
| Sparcl1  | 0.28 | 0.00 | 0.00 | 0.64 | 0.37 | 2 | Stromal Cell |
| Hsp90ab1 | 0.29 | 0.00 | 0.00 | 0.94 | 0.88 | 2 | Stromal Cell |
| Ptms     | 0.50 | 0.00 | 0.00 | 0.58 | 0.39 | 2 | Stromal Cell |
| Twsg1    | 0.51 | 0.00 | 0.00 | 0.25 | 0.11 | 2 | Stromal Cell |
| Nfic     | 0.46 | 0.00 | 0.00 | 0.42 | 0.23 | 2 | Stromal Cell |
| Fam101b  | 0.47 | 0.00 | 0.00 | 0.34 | 0.17 | 2 | Stromal Cell |
| Itm2c    | 0.50 | 0.00 | 0.00 | 0.39 | 0.21 | 2 | Stromal Cell |
| Prdx2    | 0.47 | 0.00 | 0.00 | 0.51 | 0.32 | 2 | Stromal Cell |
| Nfia     | 0.49 | 0.00 | 0.00 | 0.41 | 0.23 | 2 | Stromal Cell |
| Dynlrb1  | 0.48 | 0.00 | 0.00 | 0.51 | 0.33 | 2 | Stromal Cell |
| Marcks1  | 0.44 | 0.00 | 0.00 | 0.36 | 0.18 | 2 | Stromal Cell |
| Ndufa11  | 0.50 | 0.00 | 0.00 | 0.44 | 0.26 | 2 | Stromal Cell |
| Cdc42ep3 | 0.55 | 0.00 | 0.00 | 0.28 | 0.14 | 2 | Stromal Cell |

|               |      |      |      |      |      |   |              |
|---------------|------|------|------|------|------|---|--------------|
| Nupr1         | 0.36 | 0.00 | 0.00 | 0.34 | 0.17 | 2 | Stromal Cell |
| Gng12         | 0.45 | 0.00 | 0.00 | 0.25 | 0.11 | 2 | Stromal Cell |
| Serf2         | 0.41 | 0.00 | 0.00 | 0.71 | 0.55 | 2 | Stromal Cell |
| Fibin         | 0.39 | 0.00 | 0.00 | 0.26 | 0.12 | 2 | Stromal Cell |
| Fblim1        | 0.33 | 0.00 | 0.00 | 0.32 | 0.15 | 2 | Stromal Cell |
| Nptn          | 0.46 | 0.00 | 0.00 | 0.37 | 0.20 | 2 | Stromal Cell |
| Calr          | 0.47 | 0.00 | 0.00 | 0.59 | 0.42 | 2 | Stromal Cell |
| Dst           | 0.52 | 0.00 | 0.00 | 0.26 | 0.13 | 2 | Stromal Cell |
| Lamc1         | 0.43 | 0.00 | 0.00 | 0.30 | 0.15 | 2 | Stromal Cell |
| Sept2         | 0.43 | 0.00 | 0.00 | 0.52 | 0.34 | 2 | Stromal Cell |
| Gnb4          | 0.44 | 0.00 | 0.00 | 0.26 | 0.12 | 2 | Stromal Cell |
| Mgll          | 0.38 | 0.00 | 0.00 | 0.30 | 0.15 | 2 | Stromal Cell |
| Zfp260        | 0.45 | 0.00 | 0.00 | 0.25 | 0.12 | 2 | Stromal Cell |
| Sept11        | 0.44 | 0.00 | 0.00 | 0.38 | 0.21 | 2 | Stromal Cell |
| Pls3          | 0.44 | 0.00 | 0.00 | 0.35 | 0.19 | 2 | Stromal Cell |
| mt-Cytb       | 0.26 | 0.00 | 0.00 | 0.91 | 0.82 | 2 | Stromal Cell |
| Prdx4         | 0.43 | 0.00 | 0.00 | 0.30 | 0.15 | 2 | Stromal Cell |
| 0610007N19Rik | 0.38 | 0.00 | 0.00 | 0.28 | 0.14 | 2 | Stromal Cell |
| Npm1          | 0.33 | 0.00 | 0.00 | 0.72 | 0.57 | 2 | Stromal Cell |
| Pdia6         | 0.43 | 0.00 | 0.00 | 0.46 | 0.29 | 2 | Stromal Cell |
| Epb4.1l2      | 0.41 | 0.00 | 0.00 | 0.33 | 0.18 | 2 | Stromal Cell |
| Svil          | 0.50 | 0.00 | 0.00 | 0.30 | 0.16 | 2 | Stromal Cell |
| Arid5b        | 0.46 | 0.00 | 0.00 | 0.37 | 0.21 | 2 | Stromal Cell |
| Ssr2          | 0.41 | 0.00 | 0.00 | 0.46 | 0.30 | 2 | Stromal Cell |
| F2r           | 0.37 | 0.00 | 0.00 | 0.27 | 0.13 | 2 | Stromal Cell |
| Pebp1         | 0.40 | 0.00 | 0.00 | 0.40 | 0.24 | 2 | Stromal Cell |
| Rsu1          | 0.40 | 0.00 | 0.00 | 0.34 | 0.19 | 2 | Stromal Cell |
| 9530068E07Rik | 0.40 | 0.00 | 0.00 | 0.30 | 0.17 | 2 | Stromal Cell |
| Ppib          | 0.38 | 0.00 | 0.00 | 0.58 | 0.42 | 2 | Stromal Cell |
| Ostc          | 0.39 | 0.00 | 0.00 | 0.37 | 0.22 | 2 | Stromal Cell |
| Pdap1         | 0.35 | 0.00 | 0.00 | 0.59 | 0.44 | 2 | Stromal Cell |
| Ddah2         | 0.32 | 0.00 | 0.00 | 0.42 | 0.25 | 2 | Stromal Cell |
| Tmed9         | 0.40 | 0.00 | 0.00 | 0.40 | 0.25 | 2 | Stromal Cell |
| Ddost         | 0.41 | 0.00 | 0.00 | 0.32 | 0.18 | 2 | Stromal Cell |
| Cfdp1         | 0.36 | 0.00 | 0.00 | 0.53 | 0.37 | 2 | Stromal Cell |
| Csnk1a1       | 0.33 | 0.00 | 0.00 | 0.67 | 0.53 | 2 | Stromal Cell |
| Thoc7         | 0.40 | 0.00 | 0.00 | 0.47 | 0.31 | 2 | Stromal Cell |
| Myl12a        | 0.29 | 0.00 | 0.00 | 0.76 | 0.65 | 2 | Stromal Cell |
| Yipf5         | 0.36 | 0.00 | 0.00 | 0.25 | 0.13 | 2 | Stromal Cell |
| Pdia3         | 0.34 | 0.00 | 0.00 | 0.58 | 0.43 | 2 | Stromal Cell |
| Lman1         | 0.39 | 0.00 | 0.00 | 0.31 | 0.18 | 2 | Stromal Cell |
| Sept15        | 0.38 | 0.00 | 0.00 | 0.48 | 0.33 | 2 | Stromal Cell |
| Sfr1          | 0.37 | 0.00 | 0.00 | 0.48 | 0.33 | 2 | Stromal Cell |

|          |      |      |      |      |      |   |              |
|----------|------|------|------|------|------|---|--------------|
| Oxct1    | 0.40 | 0.00 | 0.00 | 0.26 | 0.14 | 2 | Stromal Cell |
| Dnajc10  | 0.37 | 0.00 | 0.00 | 0.26 | 0.14 | 2 | Stromal Cell |
| Tia1     | 0.36 | 0.00 | 0.00 | 0.35 | 0.21 | 2 | Stromal Cell |
| Nr2f2    | 0.27 | 0.00 | 0.00 | 0.35 | 0.20 | 2 | Stromal Cell |
| Cbx1     | 0.34 | 0.00 | 0.00 | 0.56 | 0.41 | 2 | Stromal Cell |
| Eprs     | 0.39 | 0.00 | 0.00 | 0.35 | 0.22 | 2 | Stromal Cell |
| Kdelr2   | 0.37 | 0.00 | 0.00 | 0.31 | 0.18 | 2 | Stromal Cell |
| Slmap    | 0.43 | 0.00 | 0.00 | 0.27 | 0.15 | 2 | Stromal Cell |
| Myh9     | 0.34 | 0.00 | 0.00 | 0.47 | 0.32 | 2 | Stromal Cell |
| Tmem59   | 0.36 | 0.00 | 0.00 | 0.54 | 0.40 | 2 | Stromal Cell |
| mt-Nd2   | 0.26 | 0.00 | 0.00 | 0.80 | 0.69 | 2 | Stromal Cell |
| Cox20    | 0.33 | 0.00 | 0.00 | 0.30 | 0.17 | 2 | Stromal Cell |
| Eif4g2   | 0.31 | 0.00 | 0.00 | 0.55 | 0.40 | 2 | Stromal Cell |
| Arl1     | 0.37 | 0.00 | 0.00 | 0.32 | 0.20 | 2 | Stromal Cell |
| Rbbp7    | 0.33 | 0.00 | 0.00 | 0.38 | 0.25 | 2 | Stromal Cell |
| Myo1b    | 0.33 | 0.00 | 0.00 | 0.28 | 0.16 | 2 | Stromal Cell |
| Bccip    | 0.37 | 0.00 | 0.00 | 0.32 | 0.20 | 2 | Stromal Cell |
| Rtn4     | 0.36 | 0.00 | 0.00 | 0.35 | 0.23 | 2 | Stromal Cell |
| Psmd7    | 0.33 | 0.00 | 0.00 | 0.41 | 0.28 | 2 | Stromal Cell |
| Nars     | 0.35 | 0.00 | 0.00 | 0.45 | 0.32 | 2 | Stromal Cell |
| Zfp36l1  | 0.28 | 0.00 | 0.00 | 0.58 | 0.45 | 2 | Stromal Cell |
| Mrfap1   | 0.32 | 0.00 | 0.00 | 0.46 | 0.33 | 2 | Stromal Cell |
| Map1lc3a | 0.39 | 0.00 | 0.00 | 0.31 | 0.20 | 2 | Stromal Cell |
| Erh      | 0.34 | 0.00 | 0.00 | 0.40 | 0.28 | 2 | Stromal Cell |
| Gm4540   | 0.35 | 0.00 | 0.00 | 0.38 | 0.26 | 2 | Stromal Cell |
| Copb2    | 0.35 | 0.00 | 0.00 | 0.28 | 0.17 | 2 | Stromal Cell |
| Vezf1    | 0.35 | 0.00 | 0.00 | 0.35 | 0.23 | 2 | Stromal Cell |
| Pdia4    | 0.34 | 0.00 | 0.00 | 0.32 | 0.20 | 2 | Stromal Cell |
| Larp7    | 0.33 | 0.00 | 0.00 | 0.27 | 0.17 | 2 | Stromal Cell |
| Cnpy2    | 0.33 | 0.00 | 0.00 | 0.30 | 0.19 | 2 | Stromal Cell |
| Sec13    | 0.32 | 0.00 | 0.00 | 0.28 | 0.17 | 2 | Stromal Cell |
| Gstp1    | 0.28 | 0.00 | 0.00 | 0.30 | 0.19 | 2 | Stromal Cell |
| Glg1     | 0.33 | 0.00 | 0.00 | 0.30 | 0.19 | 2 | Stromal Cell |
| Sar1a    | 0.33 | 0.00 | 0.00 | 0.31 | 0.20 | 2 | Stromal Cell |
| Spcs1    | 0.30 | 0.00 | 0.00 | 0.41 | 0.29 | 2 | Stromal Cell |
| Hdlbp    | 0.34 | 0.00 | 0.00 | 0.31 | 0.20 | 2 | Stromal Cell |
| Zbtb20   | 0.36 | 0.00 | 0.00 | 0.38 | 0.26 | 2 | Stromal Cell |
| Gm10222  | 0.27 | 0.00 | 0.00 | 0.56 | 0.42 | 2 | Stromal Cell |
| Ccdc41   | 0.30 | 0.00 | 0.00 | 0.27 | 0.16 | 2 | Stromal Cell |
| Purb     | 0.33 | 0.00 | 0.00 | 0.48 | 0.37 | 2 | Stromal Cell |
| Rpn2     | 0.33 | 0.00 | 0.00 | 0.31 | 0.20 | 2 | Stromal Cell |
| Romo1    | 0.32 | 0.00 | 0.00 | 0.41 | 0.29 | 2 | Stromal Cell |
| Pura     | 0.38 | 0.00 | 0.00 | 0.30 | 0.20 | 2 | Stromal Cell |

|               |      |      |      |      |      |   |              |
|---------------|------|------|------|------|------|---|--------------|
| Dynl1         | 0.26 | 0.00 | 0.00 | 0.57 | 0.44 | 2 | Stromal Cell |
| Tmem167       | 0.30 | 0.00 | 0.00 | 0.32 | 0.21 | 2 | Stromal Cell |
| Ssr3          | 0.27 | 0.00 | 0.00 | 0.42 | 0.30 | 2 | Stromal Cell |
| Canx          | 0.27 | 0.00 | 0.00 | 0.60 | 0.48 | 2 | Stromal Cell |
| Selk          | 0.28 | 0.00 | 0.00 | 0.43 | 0.31 | 2 | Stromal Cell |
| mt-Nd4l       | 0.28 | 0.00 | 0.00 | 0.49 | 0.37 | 2 | Stromal Cell |
| Cbx3          | 0.28 | 0.00 | 0.00 | 0.46 | 0.34 | 2 | Stromal Cell |
| Ccdc23        | 0.29 | 0.00 | 0.00 | 0.25 | 0.16 | 2 | Stromal Cell |
| Idh2          | 0.29 | 0.00 | 0.00 | 0.29 | 0.19 | 2 | Stromal Cell |
| Gm5611        | 0.27 | 0.00 | 0.00 | 0.46 | 0.35 | 2 | Stromal Cell |
| Ranbp1        | 0.27 | 0.00 | 0.00 | 0.40 | 0.28 | 2 | Stromal Cell |
| Ldha          | 0.26 | 0.00 | 0.00 | 0.40 | 0.29 | 2 | Stromal Cell |
| Snrpd3        | 0.27 | 0.00 | 0.00 | 0.43 | 0.31 | 2 | Stromal Cell |
| Hnrnpr        | 0.30 | 0.00 | 0.00 | 0.35 | 0.24 | 2 | Stromal Cell |
| Tln1          | 0.25 | 0.00 | 0.00 | 0.51 | 0.39 | 2 | Stromal Cell |
| Ift20         | 0.29 | 0.00 | 0.00 | 0.35 | 0.25 | 2 | Stromal Cell |
| Serinc1       | 0.28 | 0.00 | 0.00 | 0.39 | 0.29 | 2 | Stromal Cell |
| Gm6563        | 0.27 | 0.00 | 0.00 | 0.44 | 0.33 | 2 | Stromal Cell |
| Fundc2        | 0.28 | 0.00 | 0.00 | 0.25 | 0.16 | 2 | Stromal Cell |
| Gm10068       | 0.26 | 0.00 | 0.00 | 0.41 | 0.30 | 2 | Stromal Cell |
| Ginm1         | 0.30 | 0.00 | 0.00 | 0.33 | 0.23 | 2 | Stromal Cell |
| Swi5          | 0.28 | 0.00 | 0.00 | 0.36 | 0.26 | 2 | Stromal Cell |
| Ddx1          | 0.30 | 0.00 | 0.00 | 0.25 | 0.16 | 2 | Stromal Cell |
| Txn1          | 0.28 | 0.00 | 0.00 | 0.28 | 0.18 | 2 | Stromal Cell |
| Gsk3b         | 0.28 | 0.00 | 0.00 | 0.37 | 0.27 | 2 | Stromal Cell |
| Khdrbs1       | 0.27 | 0.00 | 0.00 | 0.41 | 0.31 | 2 | Stromal Cell |
| Rab1          | 0.25 | 0.00 | 0.00 | 0.41 | 0.30 | 2 | Stromal Cell |
| Chd4          | 0.26 | 0.00 | 0.00 | 0.57 | 0.48 | 2 | Stromal Cell |
| Rbpms         | 0.28 | 0.00 | 0.00 | 0.27 | 0.18 | 2 | Stromal Cell |
| Hsbp1         | 0.25 | 0.00 | 0.00 | 0.41 | 0.30 | 2 | Stromal Cell |
| Vcp           | 0.25 | 0.00 | 0.00 | 0.45 | 0.35 | 2 | Stromal Cell |
| Nr3c1         | 0.28 | 0.00 | 0.00 | 0.34 | 0.25 | 2 | Stromal Cell |
| Id2           | 0.26 | 0.00 | 0.00 | 0.43 | 0.33 | 2 | Stromal Cell |
| 1810022K09Rik | 0.27 | 0.00 | 0.00 | 0.32 | 0.23 | 2 | Stromal Cell |
| Kif1b         | 0.27 | 0.00 | 0.00 | 0.32 | 0.23 | 2 | Stromal Cell |
| Pbx1          | 0.26 | 0.00 | 0.00 | 0.28 | 0.19 | 2 | Stromal Cell |
| Cfl2          | 0.26 | 0.00 | 0.00 | 0.34 | 0.24 | 2 | Stromal Cell |
| Myadm         | 0.25 | 0.00 | 0.00 | 0.28 | 0.19 | 2 | Stromal Cell |
| Ilf2          | 0.28 | 0.00 | 0.00 | 0.27 | 0.19 | 2 | Stromal Cell |
| Psma4         | 0.25 | 0.00 | 0.00 | 0.41 | 0.31 | 2 | Stromal Cell |
| Vimp          | 0.26 | 0.00 | 0.00 | 0.39 | 0.29 | 2 | Stromal Cell |
| Arcn1         | 0.26 | 0.00 | 0.00 | 0.29 | 0.21 | 2 | Stromal Cell |
| Mpc2          | 0.25 | 0.00 | 0.00 | 0.32 | 0.23 | 2 | Stromal Cell |

|               |      |      |      |      |      |   |              |
|---------------|------|------|------|------|------|---|--------------|
| Copb1         | 0.26 | 0.00 | 0.00 | 0.29 | 0.20 | 2 | Stromal Cell |
| Vdac1         | 0.25 | 0.00 | 0.00 | 0.28 | 0.20 | 2 | Stromal Cell |
| Pik3ca        | 0.28 | 0.00 | 0.00 | 0.27 | 0.19 | 2 | Stromal Cell |
| Syncrip       | 0.26 | 0.00 | 0.00 | 0.33 | 0.24 | 2 | Stromal Cell |
| Fip1l1        | 0.28 | 0.00 | 0.00 | 0.25 | 0.18 | 2 | Stromal Cell |
| 2700089E24Rik | 0.26 | 0.00 | 0.00 | 0.31 | 0.23 | 2 | Stromal Cell |
| Golgb1        | 0.28 | 0.00 | 0.00 | 0.40 | 0.32 | 2 | Stromal Cell |
| Clip1         | 0.29 | 0.00 | 0.00 | 0.27 | 0.20 | 2 | Stromal Cell |
| Sftpc         | 3.45 | 0.00 | 0.00 | 1.00 | 0.60 | 3 | AT2 Cell     |
| Sftpa1        | 3.25 | 0.00 | 0.00 | 1.00 | 0.15 | 3 | AT2 Cell     |
| Sftpb         | 2.96 | 0.00 | 0.00 | 1.00 | 0.12 | 3 | AT2 Cell     |
| Cxcl15        | 2.90 | 0.00 | 0.00 | 0.96 | 0.09 | 3 | AT2 Cell     |
| Chi3l1        | 2.77 | 0.00 | 0.00 | 0.82 | 0.06 | 3 | AT2 Cell     |
| Hc            | 2.63 | 0.00 | 0.00 | 0.87 | 0.06 | 3 | AT2 Cell     |
| Slc34a2       | 2.62 | 0.00 | 0.00 | 0.99 | 0.09 | 3 | AT2 Cell     |
| Lyz1          | 2.52 | 0.00 | 0.00 | 0.79 | 0.14 | 3 | AT2 Cell     |
| Retnla        | 2.50 | 0.00 | 0.00 | 0.37 | 0.09 | 3 | AT2 Cell     |
| Sftpd         | 2.44 | 0.00 | 0.00 | 0.95 | 0.10 | 3 | AT2 Cell     |
| S100g         | 2.37 | 0.00 | 0.00 | 0.87 | 0.07 | 3 | AT2 Cell     |
| Lamp3         | 2.35 | 0.00 | 0.00 | 0.84 | 0.06 | 3 | AT2 Cell     |
| Bex2          | 2.19 | 0.00 | 0.00 | 0.73 | 0.06 | 3 | AT2 Cell     |
| Lpcat1        | 2.09 | 0.00 | 0.00 | 0.89 | 0.13 | 3 | AT2 Cell     |
| Sfta2         | 2.06 | 0.00 | 0.00 | 0.87 | 0.10 | 3 | AT2 Cell     |
| Ppp1r14c      | 2.04 | 0.00 | 0.00 | 0.74 | 0.06 | 3 | AT2 Cell     |
| Npc2          | 1.99 | 0.00 | 0.00 | 0.99 | 0.51 | 3 | AT2 Cell     |
| Lcn2          | 1.98 | 0.00 | 0.00 | 0.50 | 0.04 | 3 | AT2 Cell     |
| Wfdc2         | 1.97 | 0.00 | 0.00 | 0.88 | 0.11 | 3 | AT2 Cell     |
| Napsa         | 1.94 | 0.00 | 0.00 | 0.91 | 0.15 | 3 | AT2 Cell     |
| Lyz2          | 1.93 | 0.00 | 0.00 | 0.87 | 0.22 | 3 | AT2 Cell     |
| Egfl6         | 1.91 | 0.00 | 0.00 | 0.65 | 0.04 | 3 | AT2 Cell     |
| Scd1          | 1.88 | 0.00 | 0.00 | 0.57 | 0.05 | 3 | AT2 Cell     |
| Dram1         | 1.86 | 0.00 | 0.00 | 0.73 | 0.07 | 3 | AT2 Cell     |
| Abca3         | 1.83 | 0.00 | 0.00 | 0.71 | 0.08 | 3 | AT2 Cell     |
| Bex4          | 1.81 | 0.00 | 0.00 | 0.74 | 0.08 | 3 | AT2 Cell     |
| Spink5        | 1.79 | 0.00 | 0.00 | 0.49 | 0.04 | 3 | AT2 Cell     |
| Muc1          | 1.70 | 0.00 | 0.00 | 0.61 | 0.05 | 3 | AT2 Cell     |
| Rbpjl         | 1.63 | 0.00 | 0.00 | 0.51 | 0.03 | 3 | AT2 Cell     |
| Cbr2          | 1.63 | 0.00 | 0.00 | 0.82 | 0.12 | 3 | AT2 Cell     |
| Bex1          | 1.63 | 0.00 | 0.00 | 0.61 | 0.06 | 3 | AT2 Cell     |
| Lgi3          | 1.59 | 0.00 | 0.00 | 0.55 | 0.04 | 3 | AT2 Cell     |
| Fabp5         | 1.57 | 0.00 | 0.00 | 0.59 | 0.10 | 3 | AT2 Cell     |
| Neat1         | 1.49 | 0.00 | 0.00 | 0.79 | 0.23 | 3 | AT2 Cell     |
| Ptprf         | 1.45 | 0.00 | 0.00 | 0.65 | 0.12 | 3 | AT2 Cell     |

|          |      |      |      |      |      |   |          |
|----------|------|------|------|------|------|---|----------|
| Ctsh     | 1.43 | 0.00 | 0.00 | 0.72 | 0.17 | 3 | AT2 Cell |
| Alcam    | 1.43 | 0.00 | 0.00 | 0.77 | 0.19 | 3 | AT2 Cell |
| Sdc4     | 1.42 | 0.00 | 0.00 | 0.72 | 0.19 | 3 | AT2 Cell |
| Il33     | 1.40 | 0.00 | 0.00 | 0.36 | 0.01 | 3 | AT2 Cell |
| Car8     | 1.33 | 0.00 | 0.00 | 0.46 | 0.05 | 3 | AT2 Cell |
| Pi4k2b   | 1.31 | 0.00 | 0.00 | 0.48 | 0.07 | 3 | AT2 Cell |
| Acsl4    | 1.31 | 0.00 | 0.00 | 0.50 | 0.09 | 3 | AT2 Cell |
| Ppp1r9a  | 1.30 | 0.00 | 0.00 | 0.53 | 0.11 | 3 | AT2 Cell |
| Tgoln1   | 1.28 | 0.00 | 0.00 | 0.58 | 0.16 | 3 | AT2 Cell |
| Mid1ip1  | 1.27 | 0.00 | 0.00 | 0.49 | 0.12 | 3 | AT2 Cell |
| Ces1d    | 1.26 | 0.00 | 0.00 | 0.64 | 0.13 | 3 | AT2 Cell |
| Fasn     | 1.25 | 0.00 | 0.00 | 0.41 | 0.05 | 3 | AT2 Cell |
| Etv5     | 1.25 | 0.00 | 0.00 | 0.41 | 0.04 | 3 | AT2 Cell |
| Cldn18   | 1.25 | 0.00 | 0.00 | 0.84 | 0.12 | 3 | AT2 Cell |
| Atp1b1   | 1.24 | 0.00 | 0.00 | 0.73 | 0.14 | 3 | AT2 Cell |
| Ank3     | 1.23 | 0.00 | 0.00 | 0.42 | 0.05 | 3 | AT2 Cell |
| Pla2g1b  | 1.21 | 0.00 | 0.00 | 0.36 | 0.03 | 3 | AT2 Cell |
| Atp6v1c2 | 1.21 | 0.00 | 0.00 | 0.37 | 0.03 | 3 | AT2 Cell |
| Atp8a1   | 1.19 | 0.00 | 0.00 | 0.54 | 0.12 | 3 | AT2 Cell |
| Rnase4   | 1.17 | 0.00 | 0.00 | 0.57 | 0.16 | 3 | AT2 Cell |
| Abcd3    | 1.17 | 0.00 | 0.00 | 0.56 | 0.16 | 3 | AT2 Cell |
| Sdc1     | 1.15 | 0.00 | 0.00 | 0.48 | 0.09 | 3 | AT2 Cell |
| Irx3     | 1.14 | 0.00 | 0.00 | 0.38 | 0.05 | 3 | AT2 Cell |
| Nkx2-1   | 1.14 | 0.00 | 0.00 | 0.45 | 0.07 | 3 | AT2 Cell |
| Snhg11   | 1.11 | 0.00 | 0.00 | 0.29 | 0.02 | 3 | AT2 Cell |
| Wbp5     | 1.10 | 0.00 | 0.00 | 0.87 | 0.45 | 3 | AT2 Cell |
| Zdhhc3   | 1.10 | 0.00 | 0.00 | 0.48 | 0.13 | 3 | AT2 Cell |
| Ngfrap1  | 1.09 | 0.00 | 0.00 | 0.59 | 0.21 | 3 | AT2 Cell |
| Fgfr2    | 1.08 | 0.00 | 0.00 | 0.36 | 0.05 | 3 | AT2 Cell |
| Nucb2    | 1.07 | 0.00 | 0.00 | 0.48 | 0.14 | 3 | AT2 Cell |
| Mgst1    | 1.07 | 0.00 | 0.00 | 0.62 | 0.17 | 3 | AT2 Cell |
| Dcxr     | 1.06 | 0.00 | 0.00 | 0.44 | 0.08 | 3 | AT2 Cell |
| Soat1    | 1.05 | 0.00 | 0.00 | 0.41 | 0.08 | 3 | AT2 Cell |
| Myo5c    | 1.02 | 0.00 | 0.00 | 0.36 | 0.06 | 3 | AT2 Cell |
| Trf      | 1.02 | 0.00 | 0.00 | 0.35 | 0.08 | 3 | AT2 Cell |
| Brd7     | 1.01 | 0.00 | 0.00 | 0.60 | 0.23 | 3 | AT2 Cell |
| Epcam    | 1.01 | 0.00 | 0.00 | 0.40 | 0.08 | 3 | AT2 Cell |
| Tinag    | 1.00 | 0.00 | 0.00 | 0.28 | 0.02 | 3 | AT2 Cell |
| Cldn3    | 1.00 | 0.00 | 0.00 | 0.48 | 0.09 | 3 | AT2 Cell |
| Cat      | 0.99 | 0.00 | 0.00 | 0.40 | 0.10 | 3 | AT2 Cell |
| Atp11a   | 0.99 | 0.00 | 0.00 | 0.39 | 0.09 | 3 | AT2 Cell |
| Gclc     | 0.96 | 0.00 | 0.00 | 0.31 | 0.07 | 3 | AT2 Cell |
| Ctsc     | 0.95 | 0.00 | 0.00 | 0.54 | 0.17 | 3 | AT2 Cell |

|           |      |      |      |      |      |   |          |
|-----------|------|------|------|------|------|---|----------|
| Spint2    | 0.94 | 0.00 | 0.00 | 0.40 | 0.09 | 3 | AT2 Cell |
| Exosc7    | 0.93 | 0.00 | 0.00 | 0.40 | 0.11 | 3 | AT2 Cell |
| Meg3      | 0.92 | 0.00 | 0.00 | 0.64 | 0.19 | 3 | AT2 Cell |
| Mecom     | 0.92 | 0.00 | 0.00 | 0.35 | 0.09 | 3 | AT2 Cell |
| Gas6      | 0.91 | 0.00 | 0.00 | 0.42 | 0.13 | 3 | AT2 Cell |
| Ptplad1   | 0.90 | 0.00 | 0.00 | 0.32 | 0.08 | 3 | AT2 Cell |
| Scd2      | 0.89 | 0.00 | 0.00 | 0.52 | 0.19 | 3 | AT2 Cell |
| Smim6     | 0.88 | 0.00 | 0.00 | 0.25 | 0.02 | 3 | AT2 Cell |
| Prr15l    | 0.87 | 0.00 | 0.00 | 0.28 | 0.05 | 3 | AT2 Cell |
| Cmtm8     | 0.86 | 0.00 | 0.00 | 0.38 | 0.11 | 3 | AT2 Cell |
| H2afj     | 0.86 | 0.00 | 0.00 | 0.62 | 0.30 | 3 | AT2 Cell |
| Tmem243   | 0.86 | 0.00 | 0.00 | 0.29 | 0.06 | 3 | AT2 Cell |
| Prnp      | 0.85 | 0.00 | 0.00 | 0.36 | 0.10 | 3 | AT2 Cell |
| Rab27b    | 0.85 | 0.00 | 0.00 | 0.29 | 0.06 | 3 | AT2 Cell |
| Snx25     | 0.84 | 0.00 | 0.00 | 0.26 | 0.05 | 3 | AT2 Cell |
| Id2       | 0.84 | 0.00 | 0.00 | 0.67 | 0.31 | 3 | AT2 Cell |
| Chchd10   | 0.84 | 0.00 | 0.00 | 0.44 | 0.11 | 3 | AT2 Cell |
| Mettl7a1  | 0.84 | 0.00 | 0.00 | 0.52 | 0.19 | 3 | AT2 Cell |
| Cdh1      | 0.84 | 0.00 | 0.00 | 0.30 | 0.06 | 3 | AT2 Cell |
| Slc39a8   | 0.80 | 0.00 | 0.00 | 0.30 | 0.06 | 3 | AT2 Cell |
| Cadm1     | 0.79 | 0.00 | 0.00 | 0.41 | 0.12 | 3 | AT2 Cell |
| Cd74      | 0.74 | 0.00 | 0.00 | 0.46 | 0.10 | 3 | AT2 Cell |
| Mt1       | 0.72 | 0.00 | 0.00 | 0.44 | 0.14 | 3 | AT2 Cell |
| H2-Aa     | 0.69 | 0.00 | 0.00 | 0.33 | 0.06 | 3 | AT2 Cell |
| Ager      | 0.68 | 0.00 | 0.00 | 0.72 | 0.13 | 3 | AT2 Cell |
| Malat1    | 0.41 | 0.00 | 0.00 | 1.00 | 1.00 | 3 | AT2 Cell |
| Serpinb6b | 0.78 | 0.00 | 0.00 | 0.43 | 0.15 | 3 | AT2 Cell |
| Slc12a2   | 0.79 | 0.00 | 0.00 | 0.40 | 0.13 | 3 | AT2 Cell |
| Mbip      | 0.80 | 0.00 | 0.00 | 0.33 | 0.10 | 3 | AT2 Cell |
| Acot1     | 0.74 | 0.00 | 0.00 | 0.26 | 0.06 | 3 | AT2 Cell |
| Gde1      | 0.77 | 0.00 | 0.00 | 0.38 | 0.13 | 3 | AT2 Cell |
| H2-Ab1    | 0.39 | 0.00 | 0.00 | 0.29 | 0.08 | 3 | AT2 Cell |
| Cldn7     | 0.65 | 0.00 | 0.00 | 0.26 | 0.07 | 3 | AT2 Cell |
| Taok3     | 0.75 | 0.00 | 0.00 | 0.43 | 0.17 | 3 | AT2 Cell |
| Itga9     | 0.69 | 0.00 | 0.00 | 0.28 | 0.08 | 3 | AT2 Cell |
| Nupr1     | 0.75 | 0.00 | 0.00 | 0.42 | 0.17 | 3 | AT2 Cell |
| Dpp4      | 0.66 | 0.00 | 0.00 | 0.34 | 0.11 | 3 | AT2 Cell |
| Pon3      | 0.69 | 0.00 | 0.00 | 0.29 | 0.09 | 3 | AT2 Cell |
| Rps19     | 0.48 | 0.00 | 0.00 | 0.94 | 0.82 | 3 | AT2 Cell |
| Scp2      | 0.77 | 0.00 | 0.00 | 0.57 | 0.31 | 3 | AT2 Cell |
| Vamp8     | 0.67 | 0.00 | 0.00 | 0.61 | 0.33 | 3 | AT2 Cell |
| Avpi1     | 0.69 | 0.00 | 0.00 | 0.26 | 0.07 | 3 | AT2 Cell |
| Uhrf1bp1l | 0.70 | 0.00 | 0.00 | 0.28 | 0.08 | 3 | AT2 Cell |

|               |      |      |      |      |      |   |          |
|---------------|------|------|------|------|------|---|----------|
| Rai14         | 0.70 | 0.00 | 0.00 | 0.29 | 0.10 | 3 | AT2 Cell |
| Myh14         | 0.60 | 0.00 | 0.00 | 0.28 | 0.08 | 3 | AT2 Cell |
| Emb           | 0.63 | 0.00 | 0.00 | 0.30 | 0.10 | 3 | AT2 Cell |
| Oat           | 0.72 | 0.00 | 0.00 | 0.32 | 0.11 | 3 | AT2 Cell |
| App           | 0.47 | 0.00 | 0.00 | 0.83 | 0.58 | 3 | AT2 Cell |
| Elovl1        | 0.72 | 0.00 | 0.00 | 0.35 | 0.14 | 3 | AT2 Cell |
| Cd36          | 0.38 | 0.00 | 0.00 | 0.63 | 0.31 | 3 | AT2 Cell |
| Bri3          | 0.68 | 0.00 | 0.00 | 0.42 | 0.19 | 3 | AT2 Cell |
| Acsl5         | 0.64 | 0.00 | 0.00 | 0.28 | 0.10 | 3 | AT2 Cell |
| Iqgap1        | 0.54 | 0.00 | 0.00 | 0.69 | 0.43 | 3 | AT2 Cell |
| Iah1          | 0.65 | 0.00 | 0.00 | 0.29 | 0.11 | 3 | AT2 Cell |
| Adk           | 0.62 | 0.00 | 0.00 | 0.29 | 0.11 | 3 | AT2 Cell |
| Usp8          | 0.66 | 0.00 | 0.00 | 0.35 | 0.15 | 3 | AT2 Cell |
| Ptgs1         | 0.63 | 0.00 | 0.00 | 0.26 | 0.09 | 3 | AT2 Cell |
| Tmem245       | 0.59 | 0.00 | 0.00 | 0.26 | 0.09 | 3 | AT2 Cell |
| Chka          | 0.59 | 0.00 | 0.00 | 0.26 | 0.09 | 3 | AT2 Cell |
| Secisbp2l     | 0.61 | 0.00 | 0.00 | 0.36 | 0.17 | 3 | AT2 Cell |
| Cpm           | 0.45 | 0.00 | 0.00 | 0.38 | 0.17 | 3 | AT2 Cell |
| Tmbim6        | 0.54 | 0.00 | 0.00 | 0.57 | 0.36 | 3 | AT2 Cell |
| Cd63          | 0.53 | 0.00 | 0.00 | 0.50 | 0.28 | 3 | AT2 Cell |
| Gm26924       | 0.62 | 0.00 | 0.00 | 0.73 | 0.56 | 3 | AT2 Cell |
| Dbi           | 0.56 | 0.00 | 0.00 | 0.56 | 0.36 | 3 | AT2 Cell |
| Lpin2         | 0.50 | 0.00 | 0.00 | 0.31 | 0.14 | 3 | AT2 Cell |
| Fkbp4         | 0.56 | 0.00 | 0.00 | 0.30 | 0.14 | 3 | AT2 Cell |
| Mtch1         | 0.58 | 0.00 | 0.00 | 0.29 | 0.14 | 3 | AT2 Cell |
| Arl6ip1       | 0.36 | 0.00 | 0.00 | 0.71 | 0.51 | 3 | AT2 Cell |
| Bsg           | 0.46 | 0.00 | 0.00 | 0.54 | 0.35 | 3 | AT2 Cell |
| Ccz1          | 0.86 | 0.00 | 0.00 | 0.27 | 0.12 | 3 | AT2 Cell |
| Ctnnb1        | 0.51 | 0.00 | 0.00 | 0.52 | 0.33 | 3 | AT2 Cell |
| Swt1          | 0.49 | 0.00 | 0.00 | 0.29 | 0.15 | 3 | AT2 Cell |
| Rnaset2b      | 0.50 | 0.00 | 0.00 | 0.41 | 0.25 | 3 | AT2 Cell |
| Rnaset2a      | 0.49 | 0.00 | 0.00 | 0.41 | 0.25 | 3 | AT2 Cell |
| Atp6v1a       | 0.46 | 0.00 | 0.00 | 0.43 | 0.27 | 3 | AT2 Cell |
| Tmem30a       | 0.48 | 0.00 | 0.00 | 0.43 | 0.27 | 3 | AT2 Cell |
| Ezr           | 0.33 | 0.00 | 0.00 | 0.37 | 0.21 | 3 | AT2 Cell |
| Chd3          | 0.45 | 0.00 | 0.00 | 0.32 | 0.18 | 3 | AT2 Cell |
| Sepp1         | 0.26 | 0.00 | 0.00 | 0.59 | 0.40 | 3 | AT2 Cell |
| Tnfaip1       | 0.45 | 0.00 | 0.00 | 0.29 | 0.16 | 3 | AT2 Cell |
| Etfb          | 0.43 | 0.00 | 0.00 | 0.42 | 0.27 | 3 | AT2 Cell |
| Dstn          | 0.30 | 0.00 | 0.00 | 0.66 | 0.49 | 3 | AT2 Cell |
| 1500012F01Rik | 0.43 | 0.00 | 0.00 | 0.44 | 0.29 | 3 | AT2 Cell |
| Arf6          | 0.43 | 0.00 | 0.00 | 0.31 | 0.18 | 3 | AT2 Cell |
| Pcnt          | 0.48 | 0.00 | 0.00 | 0.25 | 0.14 | 3 | AT2 Cell |

|          |      |      |      |      |      |   |          |
|----------|------|------|------|------|------|---|----------|
| Phldb2   | 0.36 | 0.00 | 0.00 | 0.42 | 0.28 | 3 | AT2 Cell |
| Tspo     | 0.38 | 0.00 | 0.00 | 0.38 | 0.25 | 3 | AT2 Cell |
| Golga4   | 0.38 | 0.00 | 0.00 | 0.41 | 0.29 | 3 | AT2 Cell |
| Rpl21    | 0.26 | 0.00 | 0.00 | 0.84 | 0.74 | 3 | AT2 Cell |
| Snx4     | 0.40 | 0.00 | 0.00 | 0.37 | 0.24 | 3 | AT2 Cell |
| Ift20    | 0.39 | 0.00 | 0.00 | 0.37 | 0.25 | 3 | AT2 Cell |
| Rpl36a1  | 0.30 | 0.00 | 0.00 | 0.63 | 0.52 | 3 | AT2 Cell |
| Nfe2l2   | 0.35 | 0.00 | 0.00 | 0.36 | 0.24 | 3 | AT2 Cell |
| Apc      | 0.34 | 0.00 | 0.00 | 0.34 | 0.23 | 3 | AT2 Cell |
| Vimp     | 0.32 | 0.00 | 0.00 | 0.41 | 0.29 | 3 | AT2 Cell |
| Akap9    | 0.25 | 0.00 | 0.00 | 0.48 | 0.35 | 3 | AT2 Cell |
| Atp6v1g1 | 0.32 | 0.00 | 0.00 | 0.42 | 0.31 | 3 | AT2 Cell |
| Wls      | 0.30 | 0.00 | 0.00 | 0.32 | 0.22 | 3 | AT2 Cell |
| Ddx17    | 0.33 | 0.00 | 0.00 | 0.34 | 0.24 | 3 | AT2 Cell |
| Use1     | 0.29 | 0.00 | 0.00 | 0.35 | 0.26 | 3 | AT2 Cell |
| Ndufc2   | 0.25 | 0.00 | 0.00 | 0.47 | 0.38 | 3 | AT2 Cell |
| Tceal8   | 0.34 | 0.00 | 0.00 | 0.27 | 0.19 | 3 | AT2 Cell |
| Higd1a   | 0.27 | 0.00 | 0.00 | 0.26 | 0.18 | 3 | AT2 Cell |
| Fkbp2    | 0.30 | 0.00 | 0.00 | 0.25 | 0.18 | 3 | AT2 Cell |
| Cyb5     | 0.26 | 0.00 | 0.00 | 0.34 | 0.26 | 3 | AT2 Cell |
| Pik3ca   | 0.27 | 0.00 | 0.00 | 0.26 | 0.19 | 3 | AT2 Cell |
| Plac8    | 2.61 | 0.00 | 0.00 | 0.87 | 0.13 | 4 | Monocyte |
| Lyz2     | 2.32 | 0.00 | 0.00 | 0.91 | 0.23 | 4 | Monocyte |
| Tyrobp   | 2.26 | 0.00 | 0.00 | 0.87 | 0.08 | 4 | Monocyte |
| Fcer1g   | 2.23 | 0.00 | 0.00 | 0.82 | 0.08 | 4 | Monocyte |
| Ccr2     | 2.22 | 0.00 | 0.00 | 0.63 | 0.04 | 4 | Monocyte |
| Alox5ap  | 2.01 | 0.00 | 0.00 | 0.76 | 0.06 | 4 | Monocyte |
| Cybb     | 2.01 | 0.00 | 0.00 | 0.71 | 0.06 | 4 | Monocyte |
| Lst1     | 2.00 | 0.00 | 0.00 | 0.63 | 0.04 | 4 | Monocyte |
| Ifi27l2a | 2.00 | 0.00 | 0.00 | 0.59 | 0.07 | 4 | Monocyte |
| Ctss     | 1.94 | 0.00 | 0.00 | 0.89 | 0.11 | 4 | Monocyte |
| S100a4   | 1.92 | 0.00 | 0.00 | 0.60 | 0.04 | 4 | Monocyte |
| Ms4a6c   | 1.89 | 0.00 | 0.00 | 0.57 | 0.04 | 4 | Monocyte |
| Ifitm6   | 1.73 | 0.00 | 0.00 | 0.46 | 0.01 | 4 | Monocyte |
| Fyb      | 1.72 | 0.00 | 0.00 | 0.66 | 0.16 | 4 | Monocyte |
| Lgals3   | 1.71 | 0.00 | 0.00 | 0.71 | 0.12 | 4 | Monocyte |
| Cst3     | 1.71 | 0.00 | 0.00 | 0.95 | 0.57 | 4 | Monocyte |
| Plbd1    | 1.69 | 0.00 | 0.00 | 0.47 | 0.02 | 4 | Monocyte |
| Samsn1   | 1.67 | 0.00 | 0.00 | 0.49 | 0.04 | 4 | Monocyte |
| Clec4a3  | 1.66 | 0.00 | 0.00 | 0.44 | 0.02 | 4 | Monocyte |
| Msrb1    | 1.66 | 0.00 | 0.00 | 0.63 | 0.12 | 4 | Monocyte |
| Mpeg1    | 1.64 | 0.00 | 0.00 | 0.56 | 0.05 | 4 | Monocyte |
| Spi1     | 1.64 | 0.00 | 0.00 | 0.52 | 0.04 | 4 | Monocyte |

|          |      |      |      |      |      |   |          |
|----------|------|------|------|------|------|---|----------|
| Pla2g7   | 1.63 | 0.00 | 0.00 | 0.47 | 0.03 | 4 | Monocyte |
| Mnda     | 1.62 | 0.00 | 0.00 | 0.46 | 0.04 | 4 | Monocyte |
| Rnase6   | 1.62 | 0.00 | 0.00 | 0.46 | 0.03 | 4 | Monocyte |
| Laptn5   | 1.60 | 0.00 | 0.00 | 0.72 | 0.11 | 4 | Monocyte |
| Psap     | 1.58 | 0.00 | 0.00 | 0.87 | 0.33 | 4 | Monocyte |
| Ptpnc    | 1.56 | 0.00 | 0.00 | 0.68 | 0.12 | 4 | Monocyte |
| Wfdc17   | 1.55 | 0.00 | 0.00 | 0.38 | 0.02 | 4 | Monocyte |
| Ifi204   | 1.55 | 0.00 | 0.00 | 0.44 | 0.03 | 4 | Monocyte |
| Samhd1   | 1.51 | 0.00 | 0.00 | 0.66 | 0.17 | 4 | Monocyte |
| Cd52     | 1.50 | 0.00 | 0.00 | 0.86 | 0.17 | 4 | Monocyte |
| Cyba     | 1.50 | 0.00 | 0.00 | 0.79 | 0.27 | 4 | Monocyte |
| Gm4070   | 1.48 | 0.00 | 0.00 | 0.51 | 0.10 | 4 | Monocyte |
| Gvin1    | 1.48 | 0.00 | 0.00 | 0.51 | 0.10 | 4 | Monocyte |
| Igsf6    | 1.47 | 0.00 | 0.00 | 0.41 | 0.03 | 4 | Monocyte |
| Pld4     | 1.45 | 0.00 | 0.00 | 0.45 | 0.03 | 4 | Monocyte |
| Slfn2    | 1.44 | 0.00 | 0.00 | 0.61 | 0.11 | 4 | Monocyte |
| Gpx1     | 1.43 | 0.00 | 0.00 | 0.86 | 0.41 | 4 | Monocyte |
| Coro1a   | 1.43 | 0.00 | 0.00 | 0.52 | 0.08 | 4 | Monocyte |
| Lyz1     | 1.43 | 0.00 | 0.00 | 0.78 | 0.16 | 4 | Monocyte |
| Ccl6     | 1.41 | 0.00 | 0.00 | 0.65 | 0.07 | 4 | Monocyte |
| Gngt2    | 1.41 | 0.00 | 0.00 | 0.37 | 0.09 | 4 | Monocyte |
| Ifi205   | 1.40 | 0.00 | 0.00 | 0.37 | 0.03 | 4 | Monocyte |
| Apbb1ip  | 1.40 | 0.00 | 0.00 | 0.49 | 0.07 | 4 | Monocyte |
| Itga4    | 1.37 | 0.00 | 0.00 | 0.46 | 0.08 | 4 | Monocyte |
| Ifitm3   | 1.37 | 0.00 | 0.00 | 0.79 | 0.38 | 4 | Monocyte |
| Sat1     | 1.37 | 0.00 | 0.00 | 0.75 | 0.31 | 4 | Monocyte |
| Cd300a   | 1.36 | 0.00 | 0.00 | 0.37 | 0.02 | 4 | Monocyte |
| Bcl2a1d  | 1.35 | 0.00 | 0.00 | 0.37 | 0.07 | 4 | Monocyte |
| Mndal    | 1.34 | 0.00 | 0.00 | 0.57 | 0.14 | 4 | Monocyte |
| Gm2a     | 1.34 | 0.00 | 0.00 | 0.45 | 0.07 | 4 | Monocyte |
| Arhgap30 | 1.32 | 0.00 | 0.00 | 0.50 | 0.08 | 4 | Monocyte |
| Cx3cr1   | 1.32 | 0.00 | 0.00 | 0.30 | 0.02 | 4 | Monocyte |
| Prdx5    | 1.31 | 0.00 | 0.00 | 0.69 | 0.30 | 4 | Monocyte |
| Arhgdib  | 1.31 | 0.00 | 0.00 | 0.62 | 0.14 | 4 | Monocyte |
| Cytip    | 1.28 | 0.00 | 0.00 | 0.45 | 0.08 | 4 | Monocyte |
| Bcl2a1a  | 1.28 | 0.00 | 0.00 | 0.32 | 0.05 | 4 | Monocyte |
| Sirpb1c  | 1.27 | 0.00 | 0.00 | 0.33 | 0.02 | 4 | Monocyte |
| Itgal    | 1.24 | 0.00 | 0.00 | 0.30 | 0.03 | 4 | Monocyte |
| Tmsb4x   | 1.24 | 0.00 | 0.00 | 1.00 | 0.88 | 4 | Monocyte |
| Lsp1     | 1.23 | 0.00 | 0.00 | 0.64 | 0.17 | 4 | Monocyte |
| Gpr141   | 1.19 | 0.00 | 0.00 | 0.28 | 0.01 | 4 | Monocyte |
| Lilrb4   | 1.18 | 0.00 | 0.00 | 0.40 | 0.04 | 4 | Monocyte |
| Taldo1   | 1.17 | 0.00 | 0.00 | 0.63 | 0.24 | 4 | Monocyte |

|                |      |      |      |      |      |   |          |
|----------------|------|------|------|------|------|---|----------|
| Gsr            | 1.17 | 0.00 | 0.00 | 0.37 | 0.07 | 4 | Monocyte |
| Arpc1b         | 1.17 | 0.00 | 0.00 | 0.74 | 0.35 | 4 | Monocyte |
| Gda            | 1.17 | 0.00 | 0.00 | 0.30 | 0.04 | 4 | Monocyte |
| Ptpn6          | 1.16 | 0.00 | 0.00 | 0.41 | 0.07 | 4 | Monocyte |
| Fam111a        | 1.15 | 0.00 | 0.00 | 0.48 | 0.14 | 4 | Monocyte |
| Tpd52          | 1.14 | 0.00 | 0.00 | 0.40 | 0.09 | 4 | Monocyte |
| Csf1r          | 1.13 | 0.00 | 0.00 | 0.31 | 0.03 | 4 | Monocyte |
| Slc11a1        | 1.13 | 0.00 | 0.00 | 0.27 | 0.02 | 4 | Monocyte |
| Hcls1          | 1.11 | 0.00 | 0.00 | 0.36 | 0.06 | 4 | Monocyte |
| Ly86           | 1.11 | 0.00 | 0.00 | 0.37 | 0.05 | 4 | Monocyte |
| B2m            | 1.11 | 0.00 | 0.00 | 0.93 | 0.66 | 4 | Monocyte |
| Csf2ra         | 1.11 | 0.00 | 0.00 | 0.34 | 0.05 | 4 | Monocyte |
| Bcl2a1b        | 1.11 | 0.00 | 0.00 | 0.29 | 0.06 | 4 | Monocyte |
| Ptpn18         | 1.10 | 0.00 | 0.00 | 0.47 | 0.13 | 4 | Monocyte |
| Aif1           | 1.09 | 0.00 | 0.00 | 0.28 | 0.02 | 4 | Monocyte |
| Ncf2           | 1.08 | 0.00 | 0.00 | 0.31 | 0.03 | 4 | Monocyte |
| Marc1          | 1.06 | 0.00 | 0.00 | 0.28 | 0.03 | 4 | Monocyte |
| AF251705       | 1.05 | 0.00 | 0.00 | 0.25 | 0.02 | 4 | Monocyte |
| Psmb8          | 1.05 | 0.00 | 0.00 | 0.51 | 0.17 | 4 | Monocyte |
| Sirpb1b        | 1.05 | 0.00 | 0.00 | 0.26 | 0.02 | 4 | Monocyte |
| Nr4a1          | 1.04 | 0.00 | 0.00 | 0.28 | 0.06 | 4 | Monocyte |
| Fgr            | 1.04 | 0.00 | 0.00 | 0.25 | 0.01 | 4 | Monocyte |
| Cotl1          | 1.04 | 0.00 | 0.00 | 0.51 | 0.16 | 4 | Monocyte |
| Hck            | 1.03 | 0.00 | 0.00 | 0.28 | 0.03 | 4 | Monocyte |
| Pirb           | 1.03 | 0.00 | 0.00 | 0.29 | 0.03 | 4 | Monocyte |
| Lcp1           | 1.02 | 0.00 | 0.00 | 0.58 | 0.21 | 4 | Monocyte |
| 1810033B17Rik  | 1.00 | 0.00 | 0.00 | 0.28 | 0.02 | 4 | Monocyte |
| Fxyd5          | 1.00 | 0.00 | 0.00 | 0.50 | 0.16 | 4 | Monocyte |
| Itgb2          | 0.99 | 0.00 | 0.00 | 0.27 | 0.03 | 4 | Monocyte |
| S100a6         | 0.99 | 0.00 | 0.00 | 0.77 | 0.29 | 4 | Monocyte |
| Pygl           | 0.99 | 0.00 | 0.00 | 0.39 | 0.10 | 4 | Monocyte |
| 9930111J21Rik2 | 0.99 | 0.00 | 0.00 | 0.40 | 0.10 | 4 | Monocyte |
| Ptpre          | 0.96 | 0.00 | 0.00 | 0.29 | 0.05 | 4 | Monocyte |
| Plek           | 0.96 | 0.00 | 0.00 | 0.32 | 0.06 | 4 | Monocyte |
| Pip4k2a        | 0.95 | 0.00 | 0.00 | 0.28 | 0.05 | 4 | Monocyte |
| Il6ra          | 0.93 | 0.00 | 0.00 | 0.38 | 0.09 | 4 | Monocyte |
| Ncf1           | 0.92 | 0.00 | 0.00 | 0.31 | 0.06 | 4 | Monocyte |
| Cfp            | 0.91 | 0.00 | 0.00 | 0.27 | 0.04 | 4 | Monocyte |
| Hp             | 0.90 | 0.00 | 0.00 | 0.40 | 0.10 | 4 | Monocyte |
| Arpc2          | 0.89 | 0.00 | 0.00 | 0.86 | 0.60 | 4 | Monocyte |
| Gp49a          | 0.88 | 0.00 | 0.00 | 0.29 | 0.04 | 4 | Monocyte |
| Ms4a6b         | 0.81 | 0.00 | 0.00 | 0.29 | 0.05 | 4 | Monocyte |
| Gm9843         | 0.77 | 0.00 | 0.00 | 0.99 | 0.92 | 4 | Monocyte |

|               |      |      |      |      |      |   |          |
|---------------|------|------|------|------|------|---|----------|
| Fau           | 0.73 | 0.00 | 0.00 | 0.98 | 0.86 | 4 | Monocyte |
| Actb          | 0.59 | 0.00 | 0.00 | 1.00 | 0.98 | 4 | Monocyte |
| Al662270      | 0.90 | 0.00 | 0.00 | 0.29 | 0.06 | 4 | Monocyte |
| Prkcd         | 1.01 | 0.00 | 0.00 | 0.37 | 0.10 | 4 | Monocyte |
| 4632428N05Rik | 0.87 | 0.00 | 0.00 | 0.27 | 0.05 | 4 | Monocyte |
| Rgs2          | 0.83 | 0.00 | 0.00 | 0.64 | 0.26 | 4 | Monocyte |
| Unc93b1       | 0.85 | 0.00 | 0.00 | 0.29 | 0.06 | 4 | Monocyte |
| Prr13         | 1.07 | 0.00 | 0.00 | 0.40 | 0.12 | 4 | Monocyte |
| H2-D1         | 0.93 | 0.00 | 0.00 | 0.80 | 0.48 | 4 | Monocyte |
| Gm10116       | 0.85 | 0.00 | 0.00 | 0.83 | 0.61 | 4 | Monocyte |
| Emp3          | 1.06 | 0.00 | 0.00 | 0.51 | 0.20 | 4 | Monocyte |
| Arid3a        | 0.96 | 0.00 | 0.00 | 0.34 | 0.09 | 4 | Monocyte |
| Ctsb          | 1.03 | 0.00 | 0.00 | 0.58 | 0.26 | 4 | Monocyte |
| Cd53          | 0.81 | 0.00 | 0.00 | 0.33 | 0.08 | 4 | Monocyte |
| Smpdl3a       | 0.99 | 0.00 | 0.00 | 0.34 | 0.10 | 4 | Monocyte |
| Emb           | 0.95 | 0.00 | 0.00 | 0.36 | 0.10 | 4 | Monocyte |
| Sirpa         | 0.80 | 0.00 | 0.00 | 0.27 | 0.06 | 4 | Monocyte |
| Ifi203        | 0.95 | 0.00 | 0.00 | 0.41 | 0.13 | 4 | Monocyte |
| Crip1         | 0.93 | 0.00 | 0.00 | 0.77 | 0.46 | 4 | Monocyte |
| Ptpn1         | 1.05 | 0.00 | 0.00 | 0.49 | 0.19 | 4 | Monocyte |
| Arpc5         | 0.83 | 0.00 | 0.00 | 0.80 | 0.55 | 4 | Monocyte |
| Coro2a        | 0.85 | 0.00 | 0.00 | 0.26 | 0.06 | 4 | Monocyte |
| Cdk2ap2       | 1.09 | 0.00 | 0.00 | 0.42 | 0.14 | 4 | Monocyte |
| Ly6e          | 0.73 | 0.00 | 0.00 | 0.75 | 0.41 | 4 | Monocyte |
| Cd44          | 0.88 | 0.00 | 0.00 | 0.48 | 0.19 | 4 | Monocyte |
| Gmfg          | 0.84 | 0.00 | 0.00 | 0.39 | 0.13 | 4 | Monocyte |
| Ifngr1        | 0.95 | 0.00 | 0.00 | 0.52 | 0.22 | 4 | Monocyte |
| Actr3         | 0.87 | 0.00 | 0.00 | 0.61 | 0.32 | 4 | Monocyte |
| Shfm1         | 0.71 | 0.00 | 0.00 | 0.84 | 0.63 | 4 | Monocyte |
| Ftl1          | 0.81 | 0.00 | 0.00 | 0.78 | 0.56 | 4 | Monocyte |
| Itgam         | 0.96 | 0.00 | 0.00 | 0.55 | 0.27 | 4 | Monocyte |
| Rac2          | 0.70 | 0.00 | 0.00 | 0.34 | 0.10 | 4 | Monocyte |
| Ctsc          | 0.87 | 0.00 | 0.00 | 0.46 | 0.18 | 4 | Monocyte |
| Trim30a       | 0.84 | 0.00 | 0.00 | 0.28 | 0.07 | 4 | Monocyte |
| Sh3bgrl3      | 0.81 | 0.00 | 0.00 | 0.63 | 0.33 | 4 | Monocyte |
| Ly6c2         | 1.24 | 0.00 | 0.00 | 0.38 | 0.14 | 4 | Monocyte |
| Pycard        | 0.78 | 0.00 | 0.00 | 0.29 | 0.08 | 4 | Monocyte |
| Fam49b        | 0.82 | 0.00 | 0.00 | 0.31 | 0.10 | 4 | Monocyte |
| Ifi30         | 0.85 | 0.00 | 0.00 | 0.31 | 0.10 | 4 | Monocyte |
| Psma7         | 0.75 | 0.00 | 0.00 | 0.76 | 0.54 | 4 | Monocyte |
| Fam46a        | 0.80 | 0.00 | 0.00 | 0.29 | 0.09 | 4 | Monocyte |
| Lyn           | 0.83 | 0.00 | 0.00 | 0.34 | 0.12 | 4 | Monocyte |
| Apoe          | 0.65 | 0.00 | 0.00 | 0.54 | 0.27 | 4 | Monocyte |

|          |      |      |      |      |      |   |          |
|----------|------|------|------|------|------|---|----------|
| Zfp36l2  | 0.79 | 0.00 | 0.00 | 0.31 | 0.10 | 4 | Monocyte |
| Zeb2     | 0.76 | 0.00 | 0.00 | 0.57 | 0.30 | 4 | Monocyte |
| Lrrc58   | 0.44 | 0.00 | 0.00 | 0.98 | 0.91 | 4 | Monocyte |
| Rps27a   | 0.52 | 0.00 | 0.00 | 0.88 | 0.76 | 4 | Monocyte |
| Ikbkb    | 0.77 | 0.00 | 0.00 | 0.29 | 0.10 | 4 | Monocyte |
| Appt     | 0.83 | 0.00 | 0.00 | 0.38 | 0.16 | 4 | Monocyte |
| Fos      | 0.68 | 0.00 | 0.00 | 0.43 | 0.18 | 4 | Monocyte |
| Cd302    | 0.81 | 0.00 | 0.00 | 0.35 | 0.14 | 4 | Monocyte |
| Rps29    | 0.42 | 0.00 | 0.00 | 0.97 | 0.90 | 4 | Monocyte |
| Ap1s2    | 0.75 | 0.00 | 0.00 | 0.31 | 0.11 | 4 | Monocyte |
| Capg     | 0.72 | 0.00 | 0.00 | 0.28 | 0.10 | 4 | Monocyte |
| Akap13   | 0.79 | 0.00 | 0.00 | 0.49 | 0.26 | 4 | Monocyte |
| Calm1    | 0.41 | 0.00 | 0.00 | 0.95 | 0.86 | 4 | Monocyte |
| Sec11c   | 0.77 | 0.00 | 0.00 | 0.38 | 0.17 | 4 | Monocyte |
| Atox1    | 0.78 | 0.00 | 0.00 | 0.57 | 0.36 | 4 | Monocyte |
| Mcl1     | 0.78 | 0.00 | 0.00 | 0.44 | 0.22 | 4 | Monocyte |
| S100a8   | 0.59 | 0.00 | 0.00 | 0.27 | 0.10 | 4 | Monocyte |
| Fam96a   | 0.76 | 0.00 | 0.00 | 0.33 | 0.14 | 4 | Monocyte |
| Napsa    | 0.29 | 0.00 | 0.00 | 0.45 | 0.19 | 4 | Monocyte |
| Psme2b   | 0.76 | 0.00 | 0.00 | 0.51 | 0.29 | 4 | Monocyte |
| Jhdm1d   | 0.79 | 0.00 | 0.00 | 0.34 | 0.15 | 4 | Monocyte |
| Tpm3-rs7 | 0.51 | 0.00 | 0.00 | 0.84 | 0.69 | 4 | Monocyte |
| S100a11  | 0.64 | 0.00 | 0.00 | 0.67 | 0.48 | 4 | Monocyte |
| Capza2   | 0.71 | 0.00 | 0.00 | 0.54 | 0.34 | 4 | Monocyte |
| Psmb10   | 0.67 | 0.00 | 0.00 | 0.29 | 0.12 | 4 | Monocyte |
| Actr2    | 0.71 | 0.00 | 0.00 | 0.47 | 0.27 | 4 | Monocyte |
| Rps9     | 0.33 | 0.00 | 0.00 | 0.96 | 0.91 | 4 | Monocyte |
| Pomp     | 0.68 | 0.00 | 0.00 | 0.51 | 0.31 | 4 | Monocyte |
| Tln1     | 0.63 | 0.00 | 0.00 | 0.59 | 0.39 | 4 | Monocyte |
| Coro1b   | 0.71 | 0.00 | 0.00 | 0.43 | 0.24 | 4 | Monocyte |
| Mrpl33   | 0.74 | 0.00 | 0.00 | 0.48 | 0.29 | 4 | Monocyte |
| Capzb    | 0.63 | 0.00 | 0.00 | 0.59 | 0.41 | 4 | Monocyte |
| Clta     | 0.62 | 0.00 | 0.00 | 0.61 | 0.42 | 4 | Monocyte |
| Ahnak    | 0.60 | 0.00 | 0.00 | 0.63 | 0.43 | 4 | Monocyte |
| Pabpc1   | 0.35 | 0.00 | 0.00 | 0.90 | 0.80 | 4 | Monocyte |
| Eno1     | 0.65 | 0.00 | 0.00 | 0.33 | 0.15 | 4 | Monocyte |
| Pfn1     | 0.59 | 0.00 | 0.00 | 0.64 | 0.46 | 4 | Monocyte |
| Ccdc88a  | 0.71 | 0.00 | 0.00 | 0.43 | 0.24 | 4 | Monocyte |
| Psme2    | 0.70 | 0.00 | 0.00 | 0.42 | 0.23 | 4 | Monocyte |
| Stk38    | 0.70 | 0.00 | 0.00 | 0.37 | 0.19 | 4 | Monocyte |
| Tpm3     | 0.43 | 0.00 | 0.00 | 0.82 | 0.69 | 4 | Monocyte |
| Srgn     | 0.48 | 0.00 | 0.00 | 0.56 | 0.32 | 4 | Monocyte |
| Ctsz     | 0.64 | 0.00 | 0.00 | 0.31 | 0.14 | 4 | Monocyte |

|           |      |      |      |      |      |   |          |
|-----------|------|------|------|------|------|---|----------|
| Junb      | 0.62 | 0.00 | 0.00 | 0.38 | 0.19 | 4 | Monocyte |
| Serp1     | 0.66 | 0.00 | 0.00 | 0.40 | 0.22 | 4 | Monocyte |
| Rap1b     | 0.69 | 0.00 | 0.00 | 0.40 | 0.22 | 4 | Monocyte |
| Wdr89     | 0.30 | 0.00 | 0.00 | 0.95 | 0.89 | 4 | Monocyte |
| mt-Rnr2   | 0.31 | 0.00 | 0.00 | 1.00 | 0.99 | 4 | Monocyte |
| Cd97      | 0.60 | 0.00 | 0.00 | 0.35 | 0.17 | 4 | Monocyte |
| Ctsa      | 0.64 | 0.00 | 0.00 | 0.27 | 0.12 | 4 | Monocyte |
| H3f3a     | 0.46 | 0.00 | 0.00 | 0.72 | 0.59 | 4 | Monocyte |
| Klf4      | 0.54 | 0.00 | 0.00 | 0.42 | 0.23 | 4 | Monocyte |
| Lrp1      | 0.55 | 0.00 | 0.00 | 0.26 | 0.11 | 4 | Monocyte |
| Anxa1     | 0.45 | 0.00 | 0.00 | 0.36 | 0.18 | 4 | Monocyte |
| Cfl1      | 0.47 | 0.00 | 0.00 | 0.71 | 0.57 | 4 | Monocyte |
| Psme1     | 0.60 | 0.00 | 0.00 | 0.48 | 0.31 | 4 | Monocyte |
| Gm5506    | 0.59 | 0.00 | 0.00 | 0.29 | 0.14 | 4 | Monocyte |
| H2-K1     | 0.52 | 0.00 | 0.00 | 0.51 | 0.32 | 4 | Monocyte |
| Gm7676    | 0.57 | 0.00 | 0.00 | 0.35 | 0.18 | 4 | Monocyte |
| Creg1     | 0.67 | 0.00 | 0.00 | 0.32 | 0.17 | 4 | Monocyte |
| Arpc4     | 0.63 | 0.00 | 0.00 | 0.33 | 0.17 | 4 | Monocyte |
| Btg1      | 0.64 | 0.00 | 0.00 | 0.45 | 0.28 | 4 | Monocyte |
| Actg1     | 0.38 | 0.00 | 0.00 | 0.85 | 0.75 | 4 | Monocyte |
| Taok3     | 0.62 | 0.00 | 0.00 | 0.34 | 0.18 | 4 | Monocyte |
| Gnai2     | 0.50 | 0.00 | 0.00 | 0.55 | 0.38 | 4 | Monocyte |
| Dusp6     | 0.64 | 0.00 | 0.00 | 0.33 | 0.18 | 4 | Monocyte |
| Ostf1     | 0.55 | 0.00 | 0.00 | 0.41 | 0.25 | 4 | Monocyte |
| Rap1a     | 0.59 | 0.00 | 0.00 | 0.46 | 0.30 | 4 | Monocyte |
| Fth1      | 0.35 | 0.00 | 0.00 | 0.89 | 0.81 | 4 | Monocyte |
| Ctage5    | 0.62 | 0.00 | 0.00 | 0.43 | 0.28 | 4 | Monocyte |
| Rpsa      | 0.39 | 0.00 | 0.00 | 0.73 | 0.61 | 4 | Monocyte |
| Pkm       | 0.58 | 0.00 | 0.00 | 0.37 | 0.22 | 4 | Monocyte |
| Neat1     | 0.45 | 0.00 | 0.00 | 0.44 | 0.26 | 4 | Monocyte |
| Zfp36     | 0.51 | 0.00 | 0.00 | 0.31 | 0.16 | 4 | Monocyte |
| Rpsa-ps10 | 0.38 | 0.00 | 0.00 | 0.77 | 0.67 | 4 | Monocyte |
| Sppl2a    | 0.58 | 0.00 | 0.00 | 0.27 | 0.13 | 4 | Monocyte |
| Tkt       | 0.56 | 0.00 | 0.00 | 0.27 | 0.14 | 4 | Monocyte |
| Msn       | 0.47 | 0.00 | 0.00 | 0.59 | 0.43 | 4 | Monocyte |
| Arhgap17  | 0.58 | 0.00 | 0.00 | 0.31 | 0.17 | 4 | Monocyte |
| mt-Rnr1   | 0.50 | 0.00 | 0.00 | 0.60 | 0.46 | 4 | Monocyte |
| Rplp2     | 0.28 | 0.00 | 0.00 | 0.89 | 0.81 | 4 | Monocyte |
| Mgst1     | 0.52 | 0.00 | 0.00 | 0.34 | 0.19 | 4 | Monocyte |
| Erp29     | 0.53 | 0.00 | 0.00 | 0.40 | 0.25 | 4 | Monocyte |
| Rps11     | 0.30 | 0.00 | 0.00 | 0.83 | 0.76 | 4 | Monocyte |
| Fam32a    | 0.60 | 0.00 | 0.00 | 0.37 | 0.24 | 4 | Monocyte |
| Plin2     | 0.50 | 0.00 | 0.00 | 0.25 | 0.13 | 4 | Monocyte |

|               |      |      |      |      |      |   |          |
|---------------|------|------|------|------|------|---|----------|
| Nmt1          | 0.58 | 0.00 | 0.00 | 0.36 | 0.22 | 4 | Monocyte |
| Iqgap1        | 0.43 | 0.00 | 0.00 | 0.59 | 0.44 | 4 | Monocyte |
| Diap1         | 0.57 | 0.00 | 0.00 | 0.26 | 0.14 | 4 | Monocyte |
| Ccdc12        | 0.57 | 0.00 | 0.00 | 0.31 | 0.18 | 4 | Monocyte |
| Arpc3         | 0.50 | 0.00 | 0.00 | 0.40 | 0.26 | 4 | Monocyte |
| Anxa2         | 0.44 | 0.00 | 0.00 | 0.60 | 0.47 | 4 | Monocyte |
| Sub1          | 0.42 | 0.00 | 0.00 | 0.62 | 0.51 | 4 | Monocyte |
| Mycbp2        | 0.53 | 0.00 | 0.00 | 0.37 | 0.23 | 4 | Monocyte |
| Slk           | 0.43 | 0.00 | 0.00 | 0.57 | 0.43 | 4 | Monocyte |
| Serf2         | 0.41 | 0.00 | 0.00 | 0.66 | 0.56 | 4 | Monocyte |
| Tspo          | 0.56 | 0.00 | 0.00 | 0.38 | 0.25 | 4 | Monocyte |
| Rps10-ps1     | 0.27 | 0.00 | 0.00 | 0.84 | 0.77 | 4 | Monocyte |
| Llph          | 0.50 | 0.00 | 0.00 | 0.46 | 0.33 | 4 | Monocyte |
| Cap1          | 0.52 | 0.00 | 0.00 | 0.29 | 0.16 | 4 | Monocyte |
| Rpl35a        | 0.26 | 0.00 | 0.00 | 0.86 | 0.79 | 4 | Monocyte |
| Tor1aip1      | 0.53 | 0.00 | 0.00 | 0.31 | 0.18 | 4 | Monocyte |
| Flna          | 0.47 | 0.00 | 0.00 | 0.36 | 0.23 | 4 | Monocyte |
| Gm22751       | 0.54 | 0.00 | 0.00 | 0.27 | 0.16 | 4 | Monocyte |
| Ptbp3         | 0.47 | 0.00 | 0.00 | 0.48 | 0.36 | 4 | Monocyte |
| Arid4a        | 0.53 | 0.00 | 0.00 | 0.41 | 0.29 | 4 | Monocyte |
| Clic1         | 0.41 | 0.00 | 0.00 | 0.50 | 0.37 | 4 | Monocyte |
| Klf13         | 0.49 | 0.00 | 0.00 | 0.28 | 0.17 | 4 | Monocyte |
| Mir692-2a     | 0.55 | 0.00 | 0.00 | 0.31 | 0.19 | 4 | Monocyte |
| Lrrfip1       | 0.49 | 0.00 | 0.00 | 0.37 | 0.25 | 4 | Monocyte |
| 2810474O19Rik | 0.49 | 0.00 | 0.00 | 0.38 | 0.26 | 4 | Monocyte |
| Rpl22         | 0.25 | 0.00 | 0.00 | 0.85 | 0.79 | 4 | Monocyte |
| Glud1         | 0.49 | 0.00 | 0.00 | 0.28 | 0.17 | 4 | Monocyte |
| Reep5         | 0.48 | 0.00 | 0.00 | 0.35 | 0.24 | 4 | Monocyte |
| Atp5e         | 0.38 | 0.00 | 0.00 | 0.60 | 0.50 | 4 | Monocyte |
| H2afy         | 0.50 | 0.00 | 0.00 | 0.30 | 0.19 | 4 | Monocyte |
| Rps10         | 0.25 | 0.00 | 0.00 | 0.77 | 0.70 | 4 | Monocyte |
| Hspa8         | 0.33 | 0.00 | 0.00 | 0.73 | 0.67 | 4 | Monocyte |
| Rpl36al       | 0.36 | 0.00 | 0.00 | 0.61 | 0.52 | 4 | Monocyte |
| Gm22774       | 0.51 | 0.00 | 0.00 | 0.27 | 0.17 | 4 | Monocyte |
| Tpr           | 0.40 | 0.00 | 0.00 | 0.58 | 0.49 | 4 | Monocyte |
| Celf2         | 0.40 | 0.00 | 0.00 | 0.39 | 0.27 | 4 | Monocyte |
| Anp32a        | 0.37 | 0.00 | 0.00 | 0.68 | 0.60 | 4 | Monocyte |
| Grb2          | 0.46 | 0.00 | 0.00 | 0.28 | 0.18 | 4 | Monocyte |
| Sec61b        | 0.38 | 0.00 | 0.00 | 0.54 | 0.46 | 4 | Monocyte |
| Cdc42se1      | 0.48 | 0.00 | 0.00 | 0.29 | 0.19 | 4 | Monocyte |
| Cox4i1        | 0.26 | 0.00 | 0.00 | 0.78 | 0.73 | 4 | Monocyte |
| Nupr1         | 0.30 | 0.00 | 0.00 | 0.29 | 0.18 | 4 | Monocyte |
| Cdc42         | 0.34 | 0.00 | 0.00 | 0.62 | 0.54 | 4 | Monocyte |

|               |      |      |      |      |      |   |          |
|---------------|------|------|------|------|------|---|----------|
| Ptp4a2        | 0.38 | 0.00 | 0.00 | 0.52 | 0.43 | 4 | Monocyte |
| Cd47          | 0.34 | 0.00 | 0.00 | 0.52 | 0.43 | 4 | Monocyte |
| Tsc22d4       | 0.44 | 0.00 | 0.00 | 0.37 | 0.27 | 4 | Monocyte |
| Klf6          | 0.39 | 0.00 | 0.00 | 0.46 | 0.36 | 4 | Monocyte |
| Ywhaz         | 0.38 | 0.00 | 0.00 | 0.57 | 0.51 | 4 | Monocyte |
| Tmed5         | 0.45 | 0.00 | 0.00 | 0.26 | 0.17 | 4 | Monocyte |
| Dbi           | 0.38 | 0.00 | 0.00 | 0.46 | 0.37 | 4 | Monocyte |
| Add3          | 0.42 | 0.00 | 0.00 | 0.37 | 0.28 | 4 | Monocyte |
| Gm26924       | 0.44 | 0.00 | 0.00 | 0.63 | 0.57 | 4 | Monocyte |
| Atp6v0b       | 0.40 | 0.00 | 0.00 | 0.28 | 0.19 | 4 | Monocyte |
| Cmip          | 0.43 | 0.00 | 0.00 | 0.29 | 0.20 | 4 | Monocyte |
| Slc25a5       | 0.29 | 0.00 | 0.00 | 0.66 | 0.59 | 4 | Monocyte |
| Irf2          | 0.43 | 0.00 | 0.00 | 0.33 | 0.24 | 4 | Monocyte |
| Abrac1        | 0.39 | 0.00 | 0.00 | 0.32 | 0.23 | 4 | Monocyte |
| Pak2          | 0.39 | 0.00 | 0.00 | 0.37 | 0.29 | 4 | Monocyte |
| Gm10320       | 0.34 | 0.00 | 0.00 | 0.46 | 0.39 | 4 | Monocyte |
| Atp5h         | 0.32 | 0.00 | 0.00 | 0.53 | 0.47 | 4 | Monocyte |
| Atp6v0c       | 0.38 | 0.00 | 0.00 | 0.33 | 0.25 | 4 | Monocyte |
| Atp5l         | 0.35 | 0.00 | 0.00 | 0.50 | 0.44 | 4 | Monocyte |
| Gm10221       | 0.34 | 0.00 | 0.00 | 0.51 | 0.46 | 4 | Monocyte |
| Atp6v1e1      | 0.38 | 0.00 | 0.00 | 0.33 | 0.25 | 4 | Monocyte |
| Wdr26         | 0.39 | 0.00 | 0.00 | 0.34 | 0.26 | 4 | Monocyte |
| Brk1          | 0.35 | 0.00 | 0.00 | 0.34 | 0.26 | 4 | Monocyte |
| Cmpk1         | 0.40 | 0.00 | 0.00 | 0.28 | 0.21 | 4 | Monocyte |
| Lmo4          | 0.37 | 0.00 | 0.00 | 0.33 | 0.26 | 4 | Monocyte |
| Gabarap       | 0.29 | 0.00 | 0.00 | 0.50 | 0.44 | 4 | Monocyte |
| Prpf40a       | 0.37 | 0.00 | 0.00 | 0.40 | 0.32 | 4 | Monocyte |
| Ubl5          | 0.33 | 0.00 | 0.00 | 0.39 | 0.32 | 4 | Monocyte |
| Nsa2          | 0.38 | 0.00 | 0.00 | 0.37 | 0.30 | 4 | Monocyte |
| Zbtb7a        | 0.36 | 0.00 | 0.00 | 0.27 | 0.20 | 4 | Monocyte |
| Atp6v0e       | 0.37 | 0.00 | 0.00 | 0.27 | 0.20 | 4 | Monocyte |
| Cox6b1        | 0.26 | 0.00 | 0.00 | 0.61 | 0.57 | 4 | Monocyte |
| 2010107E04Rik | 0.31 | 0.00 | 0.00 | 0.47 | 0.40 | 4 | Monocyte |
| Nfe2l2        | 0.41 | 0.00 | 0.00 | 0.32 | 0.25 | 4 | Monocyte |
| S100a10       | 0.30 | 0.00 | 0.00 | 0.45 | 0.38 | 4 | Monocyte |
| BC005537      | 0.37 | 0.00 | 0.00 | 0.40 | 0.33 | 4 | Monocyte |
| Aldoa         | 0.36 | 0.00 | 0.00 | 0.26 | 0.19 | 4 | Monocyte |
| Dazap2        | 0.33 | 0.00 | 0.00 | 0.27 | 0.21 | 4 | Monocyte |
| Mbnl1         | 0.33 | 0.00 | 0.00 | 0.33 | 0.26 | 4 | Monocyte |
| Gm10250       | 0.29 | 0.00 | 0.00 | 0.55 | 0.51 | 4 | Monocyte |
| Cox7b         | 0.30 | 0.00 | 0.00 | 0.51 | 0.47 | 4 | Monocyte |
| Vamp8         | 0.25 | 0.00 | 0.00 | 0.42 | 0.34 | 4 | Monocyte |
| Tab2          | 0.37 | 0.00 | 0.00 | 0.29 | 0.23 | 4 | Monocyte |

|             |      |      |      |      |      |   |          |
|-------------|------|------|------|------|------|---|----------|
| Ifitm2      | 0.27 | 0.00 | 0.00 | 0.39 | 0.32 | 4 | Monocyte |
| Eif3k       | 0.31 | 0.00 | 0.00 | 0.39 | 0.34 | 4 | Monocyte |
| Tmem14c     | 0.33 | 0.00 | 0.00 | 0.27 | 0.21 | 4 | Monocyte |
| D8Erttd738e | 0.33 | 0.00 | 0.00 | 0.33 | 0.27 | 4 | Monocyte |
| Gm17087     | 0.33 | 0.00 | 0.00 | 0.30 | 0.24 | 4 | Monocyte |
| Tmem50a     | 0.25 | 0.00 | 0.00 | 0.49 | 0.45 | 4 | Monocyte |
| Magt1       | 0.35 | 0.00 | 0.00 | 0.25 | 0.20 | 4 | Monocyte |
| Myeov2      | 0.29 | 0.00 | 0.00 | 0.35 | 0.30 | 4 | Monocyte |
| Tma7        | 0.27 | 0.00 | 0.00 | 0.36 | 0.32 | 4 | Monocyte |
| Uqcrq       | 0.28 | 0.00 | 0.00 | 0.38 | 0.34 | 4 | Monocyte |
| Ndufb7      | 0.29 | 0.00 | 0.00 | 0.33 | 0.28 | 4 | Monocyte |
| Degs1       | 0.33 | 0.00 | 0.00 | 0.28 | 0.23 | 4 | Monocyte |
| M6pr        | 0.29 | 0.00 | 0.00 | 0.28 | 0.23 | 4 | Monocyte |
| Cox5a       | 0.27 | 0.00 | 0.00 | 0.36 | 0.31 | 4 | Monocyte |
| Fis1        | 0.28 | 0.00 | 0.00 | 0.33 | 0.29 | 4 | Monocyte |
| Chmp2a      | 0.26 | 0.00 | 0.00 | 0.35 | 0.31 | 4 | Monocyte |
| Abi1        | 0.28 | 0.00 | 0.00 | 0.27 | 0.22 | 4 | Monocyte |
| Atp6v1f     | 0.27 | 0.00 | 0.00 | 0.29 | 0.25 | 4 | Monocyte |
| Psmb3       | 0.27 | 0.00 | 0.00 | 0.34 | 0.31 | 4 | Monocyte |
| Ccdc50      | 0.26 | 0.00 | 0.00 | 0.30 | 0.26 | 4 | Monocyte |
| Smdt1       | 0.26 | 0.00 | 0.00 | 0.33 | 0.29 | 4 | Monocyte |
| Atp5l-ps1   | 0.26 | 0.00 | 0.00 | 0.31 | 0.28 | 4 | Monocyte |
| Frg1        | 0.26 | 0.00 | 0.01 | 0.29 | 0.26 | 4 | Monocyte |
| Srp9        | 0.25 | 0.00 | 0.05 | 0.31 | 0.28 | 4 | Monocyte |
| Igkc        | 3.20 | 0.00 | 0.00 | 0.86 | 0.02 | 5 | B Cell   |
| Ms4a1       | 3.06 | 0.00 | 0.00 | 0.85 | 0.02 | 5 | B Cell   |
| Ighm        | 2.86 | 0.00 | 0.00 | 0.89 | 0.03 | 5 | B Cell   |
| Cd79a       | 2.65 | 0.00 | 0.00 | 0.80 | 0.01 | 5 | B Cell   |
| Ly6d        | 2.65 | 0.00 | 0.00 | 0.79 | 0.01 | 5 | B Cell   |
| Iglc2       | 2.53 | 0.00 | 0.00 | 0.59 | 0.01 | 5 | B Cell   |
| Cd79b       | 2.53 | 0.00 | 0.00 | 0.78 | 0.03 | 5 | B Cell   |
| Cd74        | 2.32 | 0.00 | 0.00 | 0.82 | 0.10 | 5 | B Cell   |
| Cd37        | 2.24 | 0.00 | 0.00 | 0.72 | 0.05 | 5 | B Cell   |
| H2-Ab1      | 1.90 | 0.00 | 0.00 | 0.62 | 0.07 | 5 | B Cell   |
| H2-Eb1      | 1.88 | 0.00 | 0.00 | 0.53 | 0.05 | 5 | B Cell   |
| H2-Aa       | 1.80 | 0.00 | 0.00 | 0.55 | 0.06 | 5 | B Cell   |
| Cd52        | 1.74 | 0.00 | 0.00 | 0.86 | 0.17 | 5 | B Cell   |
| Ptpcrap     | 1.72 | 0.00 | 0.00 | 0.58 | 0.05 | 5 | B Cell   |
| Mzb1        | 1.68 | 0.00 | 0.00 | 0.43 | 0.01 | 5 | B Cell   |
| Bank1       | 1.65 | 0.00 | 0.00 | 0.40 | 0.01 | 5 | B Cell   |
| Vpreb3      | 1.65 | 0.00 | 0.00 | 0.28 | 0.01 | 5 | B Cell   |
| Cd19        | 1.57 | 0.00 | 0.00 | 0.41 | 0.01 | 5 | B Cell   |
| Plac8       | 1.56 | 0.00 | 0.00 | 0.74 | 0.14 | 5 | B Cell   |

|               |      |      |      |      |      |   |        |
|---------------|------|------|------|------|------|---|--------|
| Siglecg       | 1.56 | 0.00 | 0.00 | 0.40 | 0.01 | 5 | B Cell |
| Fcrla         | 1.51 | 0.00 | 0.00 | 0.39 | 0.01 | 5 | B Cell |
| Pax5          | 1.46 | 0.00 | 0.00 | 0.35 | 0.01 | 5 | B Cell |
| Sp140         | 1.37 | 0.00 | 0.00 | 0.39 | 0.06 | 5 | B Cell |
| Tnfrsf13c     | 1.35 | 0.00 | 0.00 | 0.29 | 0.01 | 5 | B Cell |
| Cd2           | 1.33 | 0.00 | 0.00 | 0.36 | 0.03 | 5 | B Cell |
| Mndal         | 1.31 | 0.00 | 0.00 | 0.57 | 0.14 | 5 | B Cell |
| Fam129c       | 1.30 | 0.00 | 0.00 | 0.28 | 0.01 | 5 | B Cell |
| Ebf1          | 1.29 | 0.00 | 0.00 | 0.33 | 0.03 | 5 | B Cell |
| Cmah          | 1.26 | 0.00 | 0.00 | 0.30 | 0.03 | 5 | B Cell |
| Ly86          | 1.25 | 0.00 | 0.00 | 0.40 | 0.05 | 5 | B Cell |
| Ifi203        | 1.24 | 0.00 | 0.00 | 0.50 | 0.12 | 5 | B Cell |
| Syk           | 1.23 | 0.00 | 0.00 | 0.34 | 0.05 | 5 | B Cell |
| D17H6S56E-5   | 1.23 | 0.00 | 0.00 | 0.40 | 0.09 | 5 | B Cell |
| Arhgdib       | 1.23 | 0.00 | 0.00 | 0.59 | 0.14 | 5 | B Cell |
| Rac2          | 1.20 | 0.00 | 0.00 | 0.48 | 0.09 | 5 | B Cell |
| Rnase6        | 1.18 | 0.00 | 0.00 | 0.34 | 0.04 | 5 | B Cell |
| Ralgps2       | 1.17 | 0.00 | 0.00 | 0.34 | 0.06 | 5 | B Cell |
| Ltb           | 1.17 | 0.00 | 0.00 | 0.28 | 0.02 | 5 | B Cell |
| H2-DMb2       | 1.14 | 0.00 | 0.00 | 0.25 | 0.01 | 5 | B Cell |
| Ptpn6         | 1.13 | 0.00 | 0.00 | 0.37 | 0.07 | 5 | B Cell |
| Tnfrsf13b     | 1.11 | 0.00 | 0.00 | 0.30 | 0.03 | 5 | B Cell |
| Cd53          | 1.08 | 0.00 | 0.00 | 0.39 | 0.08 | 5 | B Cell |
| A430104N18Rik | 1.07 | 0.00 | 0.00 | 0.32 | 0.05 | 5 | B Cell |
| Arhgap30      | 1.05 | 0.00 | 0.00 | 0.39 | 0.09 | 5 | B Cell |
| Pyhin1        | 1.04 | 0.00 | 0.00 | 0.27 | 0.04 | 5 | B Cell |
| Unc93b1       | 1.02 | 0.00 | 0.00 | 0.32 | 0.06 | 5 | B Cell |
| Lsp1          | 1.00 | 0.00 | 0.00 | 0.56 | 0.18 | 5 | B Cell |
| Rps3a1        | 0.71 | 0.00 | 0.00 | 0.97 | 0.85 | 5 | B Cell |
| Rps26         | 0.66 | 0.00 | 0.00 | 0.97 | 0.89 | 5 | B Cell |
| Rps9          | 0.64 | 0.00 | 0.00 | 0.98 | 0.91 | 5 | B Cell |
| Rpl13a        | 0.69 | 0.00 | 0.00 | 0.96 | 0.86 | 5 | B Cell |
| Apobec3       | 1.07 | 0.00 | 0.00 | 0.32 | 0.07 | 5 | B Cell |
| Ptprc         | 0.90 | 0.00 | 0.00 | 0.48 | 0.13 | 5 | B Cell |
| Gm9843        | 0.61 | 0.00 | 0.00 | 0.98 | 0.92 | 5 | B Cell |
| Cd55          | 1.12 | 0.00 | 0.00 | 0.30 | 0.07 | 5 | B Cell |
| Rpl32         | 0.68 | 0.00 | 0.00 | 0.95 | 0.84 | 5 | B Cell |
| Coro1a        | 0.91 | 0.00 | 0.00 | 0.36 | 0.09 | 5 | B Cell |
| Rps3a2        | 0.67 | 0.00 | 0.00 | 0.94 | 0.82 | 5 | B Cell |
| Rps26-ps1     | 0.64 | 0.00 | 0.00 | 0.97 | 0.87 | 5 | B Cell |
| Rpl4          | 0.69 | 0.00 | 0.00 | 0.94 | 0.83 | 5 | B Cell |
| Gm9846        | 0.64 | 0.00 | 0.00 | 0.98 | 0.89 | 5 | B Cell |
| Gm10275       | 0.81 | 0.00 | 0.00 | 0.86 | 0.66 | 5 | B Cell |

|                |      |      |      |      |      |   |        |
|----------------|------|------|------|------|------|---|--------|
| Rps11          | 0.72 | 0.00 | 0.00 | 0.90 | 0.75 | 5 | B Cell |
| Ifi30          | 1.08 | 0.00 | 0.00 | 0.36 | 0.10 | 5 | B Cell |
| Ctss           | 0.26 | 0.00 | 0.00 | 0.48 | 0.14 | 5 | B Cell |
| Wdr89          | 0.59 | 0.00 | 0.00 | 0.96 | 0.89 | 5 | B Cell |
| Ly6e           | 0.78 | 0.00 | 0.00 | 0.78 | 0.41 | 5 | B Cell |
| Sp110          | 0.90 | 0.00 | 0.00 | 0.28 | 0.06 | 5 | B Cell |
| Rps3           | 0.60 | 0.00 | 0.00 | 0.93 | 0.82 | 5 | B Cell |
| Slfn2          | 0.91 | 0.00 | 0.00 | 0.40 | 0.12 | 5 | B Cell |
| Rps5           | 0.66 | 0.00 | 0.00 | 0.91 | 0.77 | 5 | B Cell |
| mt-Co1         | 0.50 | 0.00 | 0.00 | 0.99 | 0.95 | 5 | B Cell |
| Rpl18a         | 0.60 | 0.00 | 0.00 | 0.94 | 0.82 | 5 | B Cell |
| Rpl10a         | 0.67 | 0.00 | 0.00 | 0.89 | 0.74 | 5 | B Cell |
| Rps3a3         | 0.64 | 0.00 | 0.00 | 0.91 | 0.77 | 5 | B Cell |
| Ncf1           | 0.85 | 0.00 | 0.00 | 0.26 | 0.06 | 5 | B Cell |
| Rplp1          | 0.52 | 0.00 | 0.00 | 0.97 | 0.89 | 5 | B Cell |
| Vars           | 0.91 | 0.00 | 0.00 | 0.27 | 0.07 | 5 | B Cell |
| Rps10-ps1      | 0.64 | 0.00 | 0.00 | 0.90 | 0.77 | 5 | B Cell |
| 9930111J21Rik2 | 0.96 | 0.00 | 0.00 | 0.35 | 0.11 | 5 | B Cell |
| Hcls1          | 0.79 | 0.00 | 0.00 | 0.27 | 0.07 | 5 | B Cell |
| Rps15a         | 0.55 | 0.00 | 0.00 | 0.92 | 0.81 | 5 | B Cell |
| Psmb8          | 0.85 | 0.00 | 0.00 | 0.45 | 0.17 | 5 | B Cell |
| Fau            | 0.52 | 0.00 | 0.00 | 0.94 | 0.86 | 5 | B Cell |
| Rps16          | 0.52 | 0.00 | 0.00 | 0.94 | 0.83 | 5 | B Cell |
| Rpsa-ps10      | 0.67 | 0.00 | 0.00 | 0.83 | 0.67 | 5 | B Cell |
| Parp1          | 0.94 | 0.00 | 0.00 | 0.31 | 0.09 | 5 | B Cell |
| Gm6472         | 0.57 | 0.00 | 0.00 | 0.92 | 0.79 | 5 | B Cell |
| Rps6           | 0.54 | 0.00 | 0.00 | 0.93 | 0.82 | 5 | B Cell |
| Gm2000         | 0.54 | 0.00 | 0.00 | 0.93 | 0.84 | 5 | B Cell |
| Rpl8           | 0.60 | 0.00 | 0.00 | 0.90 | 0.79 | 5 | B Cell |
| Rps20          | 0.61 | 0.00 | 0.00 | 0.90 | 0.78 | 5 | B Cell |
| Serp1          | 0.97 | 0.00 | 0.00 | 0.48 | 0.22 | 5 | B Cell |
| Tmsb4x         | 0.43 | 0.00 | 0.00 | 0.97 | 0.88 | 5 | B Cell |
| Ifi27l2a       | 0.77 | 0.00 | 0.00 | 0.30 | 0.08 | 5 | B Cell |
| Rps24          | 0.49 | 0.00 | 0.00 | 0.96 | 0.88 | 5 | B Cell |
| Cd24a          | 0.97 | 0.00 | 0.00 | 0.36 | 0.12 | 5 | B Cell |
| Sh3bgrl3       | 0.86 | 0.00 | 0.00 | 0.61 | 0.33 | 5 | B Cell |
| Gm10269        | 0.57 | 0.00 | 0.00 | 0.89 | 0.79 | 5 | B Cell |
| Mef2c          | 1.00 | 0.00 | 0.00 | 0.41 | 0.15 | 5 | B Cell |
| Gm10073        | 0.50 | 0.00 | 0.00 | 0.94 | 0.85 | 5 | B Cell |
| Rplp0          | 0.55 | 0.00 | 0.00 | 0.93 | 0.83 | 5 | B Cell |
| Gm7536         | 0.53 | 0.00 | 0.00 | 0.92 | 0.81 | 5 | B Cell |
| Limd2          | 0.93 | 0.00 | 0.00 | 0.39 | 0.14 | 5 | B Cell |
| Gnb2l1         | 0.66 | 0.00 | 0.00 | 0.81 | 0.65 | 5 | B Cell |

|           |      |      |      |      |      |   |        |
|-----------|------|------|------|------|------|---|--------|
| Rpl12     | 0.73 | 0.00 | 0.00 | 0.75 | 0.54 | 5 | B Cell |
| Gm9396    | 0.74 | 0.00 | 0.00 | 0.74 | 0.53 | 5 | B Cell |
| Pabpc1    | 0.55 | 0.00 | 0.00 | 0.92 | 0.80 | 5 | B Cell |
| Rps12-ps3 | 0.57 | 0.00 | 0.00 | 0.89 | 0.78 | 5 | B Cell |
| Gm8730    | 0.55 | 0.00 | 0.00 | 0.92 | 0.82 | 5 | B Cell |
| Sh3bp5    | 0.90 | 0.00 | 0.00 | 0.44 | 0.18 | 5 | B Cell |
| Rplp2     | 0.52 | 0.00 | 0.00 | 0.91 | 0.81 | 5 | B Cell |
| Rpl22     | 0.55 | 0.00 | 0.00 | 0.90 | 0.79 | 5 | B Cell |
| Sp100     | 0.78 | 0.00 | 0.00 | 0.27 | 0.08 | 5 | B Cell |
| Rpl14     | 0.53 | 0.00 | 0.00 | 0.92 | 0.83 | 5 | B Cell |
| Gimap4    | 0.83 | 0.00 | 0.00 | 0.42 | 0.17 | 5 | B Cell |
| Gimap6    | 0.84 | 0.00 | 0.00 | 0.40 | 0.15 | 5 | B Cell |
| Rps10     | 0.59 | 0.00 | 0.00 | 0.84 | 0.70 | 5 | B Cell |
| Actb      | 0.37 | 0.00 | 0.00 | 1.00 | 0.98 | 5 | B Cell |
| mt-Co3    | 0.47 | 0.00 | 0.00 | 0.95 | 0.88 | 5 | B Cell |
| Snx5      | 0.88 | 0.00 | 0.00 | 0.34 | 0.12 | 5 | B Cell |
| Rpl6      | 0.46 | 0.00 | 0.00 | 0.95 | 0.87 | 5 | B Cell |
| Sub1      | 0.94 | 0.00 | 0.00 | 0.69 | 0.50 | 5 | B Cell |
| Ptpn18    | 0.77 | 0.00 | 0.00 | 0.36 | 0.13 | 5 | B Cell |
| Rpl5      | 0.56 | 0.00 | 0.00 | 0.87 | 0.74 | 5 | B Cell |
| Rps27     | 0.55 | 0.00 | 0.00 | 0.93 | 0.81 | 5 | B Cell |
| Shisa5    | 0.89 | 0.00 | 0.00 | 0.43 | 0.20 | 5 | B Cell |
| Rps18     | 0.61 | 0.00 | 0.00 | 0.80 | 0.65 | 5 | B Cell |
| Rps19     | 0.46 | 0.00 | 0.00 | 0.92 | 0.82 | 5 | B Cell |
| Rps7      | 0.53 | 0.00 | 0.00 | 0.87 | 0.73 | 5 | B Cell |
| H2-K1     | 0.70 | 0.00 | 0.00 | 0.58 | 0.31 | 5 | B Cell |
| Rps25     | 0.49 | 0.00 | 0.00 | 0.90 | 0.80 | 5 | B Cell |
| H2-D1     | 0.56 | 0.00 | 0.00 | 0.75 | 0.48 | 5 | B Cell |
| Rpl35     | 0.48 | 0.00 | 0.00 | 0.89 | 0.80 | 5 | B Cell |
| Rps4x     | 0.41 | 0.00 | 0.00 | 0.95 | 0.86 | 5 | B Cell |
| Snx2      | 0.88 | 0.00 | 0.00 | 0.37 | 0.16 | 5 | B Cell |
| Gimap1    | 0.72 | 0.00 | 0.00 | 0.34 | 0.13 | 5 | B Cell |
| Il2rg     | 0.74 | 0.00 | 0.00 | 0.27 | 0.09 | 5 | B Cell |
| Crip1     | 0.86 | 0.00 | 0.00 | 0.70 | 0.47 | 5 | B Cell |
| Rpl13     | 0.48 | 0.00 | 0.00 | 0.88 | 0.79 | 5 | B Cell |
| Fam111a   | 0.83 | 0.00 | 0.00 | 0.36 | 0.15 | 5 | B Cell |
| Npm1      | 0.70 | 0.00 | 0.00 | 0.73 | 0.57 | 5 | B Cell |
| Eef1b2    | 0.57 | 0.00 | 0.00 | 0.79 | 0.64 | 5 | B Cell |
| Lrrc58    | 0.38 | 0.00 | 0.00 | 0.98 | 0.91 | 5 | B Cell |
| Gm9493    | 0.50 | 0.00 | 0.00 | 0.87 | 0.74 | 5 | B Cell |
| Rpl39     | 0.46 | 0.00 | 0.00 | 0.90 | 0.80 | 5 | B Cell |
| Itga4     | 0.69 | 0.00 | 0.00 | 0.27 | 0.09 | 5 | B Cell |
| mt-Co2    | 0.48 | 0.00 | 0.00 | 0.87 | 0.77 | 5 | B Cell |

|           |      |      |      |      |      |   |        |
|-----------|------|------|------|------|------|---|--------|
| Rpl27a    | 0.46 | 0.00 | 0.00 | 0.88 | 0.78 | 5 | B Cell |
| Nol7      | 0.77 | 0.00 | 0.00 | 0.56 | 0.35 | 5 | B Cell |
| Gm10288   | 0.47 | 0.00 | 0.00 | 0.88 | 0.78 | 5 | B Cell |
| Gmfg      | 0.76 | 0.00 | 0.00 | 0.32 | 0.13 | 5 | B Cell |
| Rps13     | 0.56 | 0.00 | 0.00 | 0.77 | 0.64 | 5 | B Cell |
| Eef1g     | 0.69 | 0.00 | 0.00 | 0.65 | 0.48 | 5 | B Cell |
| Rpl19     | 0.46 | 0.00 | 0.00 | 0.85 | 0.75 | 5 | B Cell |
| Lcp1      | 0.68 | 0.00 | 0.00 | 0.44 | 0.22 | 5 | B Cell |
| Rpsa      | 0.57 | 0.00 | 0.00 | 0.75 | 0.61 | 5 | B Cell |
| Rps18-ps3 | 0.60 | 0.00 | 0.00 | 0.71 | 0.55 | 5 | B Cell |
| mt-Nd5    | 0.51 | 0.00 | 0.00 | 0.86 | 0.75 | 5 | B Cell |
| Napsa     | 0.37 | 0.00 | 0.00 | 0.45 | 0.19 | 5 | B Cell |
| Ncl       | 0.59 | 0.00 | 0.00 | 0.85 | 0.78 | 5 | B Cell |
| Rpl3      | 0.55 | 0.00 | 0.00 | 0.75 | 0.63 | 5 | B Cell |
| Gm10263   | 0.44 | 0.00 | 0.00 | 0.88 | 0.76 | 5 | B Cell |
| Rps28     | 0.39 | 0.00 | 0.00 | 0.94 | 0.83 | 5 | B Cell |
| Grap      | 0.69 | 0.00 | 0.00 | 0.31 | 0.13 | 5 | B Cell |
| Gm10036   | 0.47 | 0.00 | 0.00 | 0.84 | 0.74 | 5 | B Cell |
| Gm5428    | 0.42 | 0.00 | 0.00 | 0.87 | 0.79 | 5 | B Cell |
| Rps15     | 0.41 | 0.00 | 0.00 | 0.87 | 0.78 | 5 | B Cell |
| H3f3a     | 0.60 | 0.00 | 0.00 | 0.72 | 0.59 | 5 | B Cell |
| Rpl13-ps3 | 0.45 | 0.00 | 0.00 | 0.85 | 0.75 | 5 | B Cell |
| Arpc5l    | 0.81 | 0.00 | 0.00 | 0.34 | 0.16 | 5 | B Cell |
| mt-Nd1    | 0.37 | 0.00 | 0.00 | 0.96 | 0.91 | 5 | B Cell |
| Rabgap1l  | 0.75 | 0.00 | 0.00 | 0.26 | 0.10 | 5 | B Cell |
| Rpl27-ps3 | 0.44 | 0.00 | 0.00 | 0.85 | 0.76 | 5 | B Cell |
| Cyba      | 0.56 | 0.00 | 0.00 | 0.51 | 0.29 | 5 | B Cell |
| Rps12     | 0.51 | 0.00 | 0.00 | 0.80 | 0.68 | 5 | B Cell |
| Rps23     | 0.38 | 0.00 | 0.00 | 0.88 | 0.79 | 5 | B Cell |
| Capg      | 0.71 | 0.00 | 0.00 | 0.25 | 0.10 | 5 | B Cell |
| Gm4070    | 0.55 | 0.00 | 0.00 | 0.28 | 0.11 | 5 | B Cell |
| Rps2      | 0.49 | 0.00 | 0.00 | 0.76 | 0.67 | 5 | B Cell |
| Gm4204    | 0.61 | 0.00 | 0.00 | 0.65 | 0.50 | 5 | B Cell |
| Mycbp2    | 0.80 | 0.00 | 0.00 | 0.41 | 0.23 | 5 | B Cell |
| Tcof1     | 0.69 | 0.00 | 0.00 | 0.26 | 0.10 | 5 | B Cell |
| Rpl23     | 0.35 | 0.00 | 0.00 | 0.94 | 0.86 | 5 | B Cell |
| Bin1      | 0.69 | 0.00 | 0.00 | 0.25 | 0.10 | 5 | B Cell |
| Sec11c    | 0.74 | 0.00 | 0.00 | 0.35 | 0.17 | 5 | B Cell |
| Rps27a    | 0.40 | 0.00 | 0.00 | 0.85 | 0.76 | 5 | B Cell |
| mt-Atp6   | 0.37 | 0.00 | 0.00 | 0.92 | 0.84 | 5 | B Cell |
| Gm11808   | 0.40 | 0.00 | 0.00 | 0.86 | 0.77 | 5 | B Cell |
| Klf2      | 0.64 | 0.00 | 0.00 | 0.38 | 0.19 | 5 | B Cell |
| Rpl26     | 0.38 | 0.00 | 0.00 | 0.88 | 0.81 | 5 | B Cell |

|            |      |      |      |      |      |   |        |
|------------|------|------|------|------|------|---|--------|
| Rpl35a     | 0.37 | 0.00 | 0.00 | 0.87 | 0.79 | 5 | B Cell |
| Rpl34      | 0.38 | 0.00 | 0.00 | 0.87 | 0.80 | 5 | B Cell |
| Nme1       | 0.73 | 0.00 | 0.00 | 0.35 | 0.18 | 5 | B Cell |
| Rps21      | 0.40 | 0.00 | 0.00 | 0.83 | 0.75 | 5 | B Cell |
| Nap1l1     | 0.56 | 0.00 | 0.00 | 0.62 | 0.47 | 5 | B Cell |
| Ezr        | 0.61 | 0.00 | 0.00 | 0.39 | 0.21 | 5 | B Cell |
| Tpm3       | 0.44 | 0.00 | 0.00 | 0.81 | 0.70 | 5 | B Cell |
| Serbp1     | 0.45 | 0.00 | 0.00 | 0.81 | 0.74 | 5 | B Cell |
| Rpl18      | 0.47 | 0.00 | 0.00 | 0.73 | 0.64 | 5 | B Cell |
| Rpl13a-ps1 | 0.52 | 0.00 | 0.00 | 0.66 | 0.55 | 5 | B Cell |
| Cotl1      | 0.62 | 0.00 | 0.00 | 0.34 | 0.17 | 5 | B Cell |
| Hsp90ab1   | 0.36 | 0.00 | 0.00 | 0.92 | 0.89 | 5 | B Cell |
| Gm10260    | 0.54 | 0.00 | 0.00 | 0.62 | 0.48 | 5 | B Cell |
| Calm1      | 0.34 | 0.00 | 0.00 | 0.92 | 0.86 | 5 | B Cell |
| Gvin1      | 0.53 | 0.00 | 0.00 | 0.26 | 0.11 | 5 | B Cell |
| Tpm3-rs7   | 0.43 | 0.00 | 0.00 | 0.81 | 0.69 | 5 | B Cell |
| Gm10335    | 0.37 | 0.00 | 0.00 | 0.82 | 0.73 | 5 | B Cell |
| Rpl11      | 0.42 | 0.00 | 0.00 | 0.77 | 0.68 | 5 | B Cell |
| Rpl41      | 0.26 | 0.00 | 0.00 | 0.98 | 0.94 | 5 | B Cell |
| Arhgap17   | 0.69 | 0.00 | 0.00 | 0.32 | 0.17 | 5 | B Cell |
| Rpl9-ps6   | 0.37 | 0.00 | 0.00 | 0.82 | 0.73 | 5 | B Cell |
| Rps14      | 0.28 | 0.00 | 0.00 | 0.95 | 0.92 | 5 | B Cell |
| Rpl7       | 0.35 | 0.00 | 0.00 | 0.82 | 0.74 | 5 | B Cell |
| Zfp706     | 0.62 | 0.00 | 0.00 | 0.47 | 0.32 | 5 | B Cell |
| Gm7589     | 0.42 | 0.00 | 0.00 | 0.73 | 0.65 | 5 | B Cell |
| Ets1       | 0.57 | 0.00 | 0.00 | 0.41 | 0.24 | 5 | B Cell |
| Rpl27      | 0.38 | 0.00 | 0.00 | 0.77 | 0.69 | 5 | B Cell |
| Itsn2      | 0.66 | 0.00 | 0.00 | 0.39 | 0.24 | 5 | B Cell |
| Crlf3      | 0.62 | 0.00 | 0.00 | 0.27 | 0.13 | 5 | B Cell |
| Gm10132    | 0.36 | 0.00 | 0.00 | 0.80 | 0.72 | 5 | B Cell |
| Rps8       | 0.31 | 0.00 | 0.00 | 0.87 | 0.81 | 5 | B Cell |
| Srgn       | 0.26 | 0.00 | 0.00 | 0.53 | 0.32 | 5 | B Cell |
| Pdcd4      | 0.64 | 0.00 | 0.00 | 0.36 | 0.22 | 5 | B Cell |
| Lyn        | 0.57 | 0.00 | 0.00 | 0.26 | 0.13 | 5 | B Cell |
| Rpl23a-ps3 | 0.33 | 0.00 | 0.00 | 0.82 | 0.75 | 5 | B Cell |
| Arpc5      | 0.42 | 0.00 | 0.00 | 0.67 | 0.56 | 5 | B Cell |
| Actr3      | 0.56 | 0.00 | 0.00 | 0.47 | 0.33 | 5 | B Cell |
| Zcchc11    | 0.65 | 0.00 | 0.00 | 0.34 | 0.20 | 5 | B Cell |
| Rps29      | 0.26 | 0.00 | 0.00 | 0.96 | 0.90 | 5 | B Cell |
| Gltscr2    | 0.49 | 0.00 | 0.00 | 0.59 | 0.48 | 5 | B Cell |
| Rpl37      | 0.31 | 0.00 | 0.00 | 0.85 | 0.80 | 5 | B Cell |
| Dnajc2     | 0.56 | 0.00 | 0.00 | 0.33 | 0.20 | 5 | B Cell |
| Nop58      | 0.65 | 0.00 | 0.00 | 0.39 | 0.26 | 5 | B Cell |

|               |      |      |      |      |      |   |        |
|---------------|------|------|------|------|------|---|--------|
| Elf1          | 0.60 | 0.00 | 0.00 | 0.34 | 0.20 | 5 | B Cell |
| Pfn1          | 0.51 | 0.00 | 0.00 | 0.57 | 0.46 | 5 | B Cell |
| Rps17         | 0.28 | 0.00 | 0.00 | 0.83 | 0.77 | 5 | B Cell |
| Rpl17         | 0.40 | 0.00 | 0.00 | 0.64 | 0.53 | 5 | B Cell |
| Eef1a1        | 0.27 | 0.00 | 0.00 | 0.90 | 0.87 | 5 | B Cell |
| Erp29         | 0.58 | 0.00 | 0.00 | 0.39 | 0.26 | 5 | B Cell |
| Llph          | 0.54 | 0.00 | 0.00 | 0.46 | 0.33 | 5 | B Cell |
| Gm5611        | 0.55 | 0.00 | 0.00 | 0.47 | 0.35 | 5 | B Cell |
| Arpc2         | 0.32 | 0.00 | 0.00 | 0.72 | 0.61 | 5 | B Cell |
| AC123611.1    | 0.49 | 0.00 | 0.00 | 0.50 | 0.39 | 5 | B Cell |
| Btg1          | 0.61 | 0.00 | 0.00 | 0.40 | 0.28 | 5 | B Cell |
| Mcl1          | 0.53 | 0.00 | 0.00 | 0.35 | 0.22 | 5 | B Cell |
| Nop56         | 0.61 | 0.00 | 0.00 | 0.32 | 0.20 | 5 | B Cell |
| Ddx21         | 0.58 | 0.00 | 0.00 | 0.38 | 0.26 | 5 | B Cell |
| Smim14        | 0.63 | 0.00 | 0.00 | 0.30 | 0.19 | 5 | B Cell |
| Hspe1         | 0.54 | 0.00 | 0.00 | 0.40 | 0.28 | 5 | B Cell |
| Rpl23a        | 0.32 | 0.00 | 0.00 | 0.74 | 0.66 | 5 | B Cell |
| Ptbp3         | 0.47 | 0.00 | 0.00 | 0.47 | 0.36 | 5 | B Cell |
| Dnajc7        | 0.58 | 0.00 | 0.00 | 0.32 | 0.21 | 5 | B Cell |
| Rpl36al       | 0.40 | 0.00 | 0.00 | 0.60 | 0.52 | 5 | B Cell |
| Gpx1          | 0.34 | 0.00 | 0.00 | 0.55 | 0.43 | 5 | B Cell |
| 4930523C07Rik | 0.56 | 0.00 | 0.00 | 0.29 | 0.18 | 5 | B Cell |
| S100a10       | 0.48 | 0.00 | 0.00 | 0.49 | 0.38 | 5 | B Cell |
| Arpc1b        | 0.41 | 0.00 | 0.00 | 0.49 | 0.37 | 5 | B Cell |
| Rpl36         | 0.32 | 0.00 | 0.00 | 0.69 | 0.63 | 5 | B Cell |
| mt-Cytb       | 0.26 | 0.00 | 0.00 | 0.87 | 0.82 | 5 | B Cell |
| Orc5          | 0.38 | 0.00 | 0.00 | 0.62 | 0.55 | 5 | B Cell |
| Rpl28         | 0.38 | 0.00 | 0.00 | 0.60 | 0.53 | 5 | B Cell |
| Naca          | 0.36 | 0.00 | 0.00 | 0.64 | 0.58 | 5 | B Cell |
| Rpl30         | 0.36 | 0.00 | 0.00 | 0.66 | 0.58 | 5 | B Cell |
| Chd1          | 0.55 | 0.00 | 0.00 | 0.27 | 0.17 | 5 | B Cell |
| Ddx5          | 0.32 | 0.00 | 0.00 | 0.75 | 0.71 | 5 | B Cell |
| 1500012F01Rik | 0.49 | 0.00 | 0.00 | 0.40 | 0.30 | 5 | B Cell |
| mt-Nd4        | 0.27 | 0.00 | 0.00 | 0.79 | 0.75 | 5 | B Cell |
| Foxp1         | 0.35 | 0.00 | 0.00 | 0.56 | 0.44 | 5 | B Cell |
| Rpl36a        | 0.30 | 0.00 | 0.00 | 0.68 | 0.62 | 5 | B Cell |
| Eml4          | 0.57 | 0.00 | 0.00 | 0.27 | 0.17 | 5 | B Cell |
| Rpl22l1       | 0.35 | 0.00 | 0.00 | 0.62 | 0.56 | 5 | B Cell |
| Mif           | 0.53 | 0.00 | 0.00 | 0.28 | 0.18 | 5 | B Cell |
| Prpf38b       | 0.39 | 0.00 | 0.00 | 0.58 | 0.49 | 5 | B Cell |
| Samhd1        | 0.37 | 0.00 | 0.00 | 0.30 | 0.19 | 5 | B Cell |
| Ccnd2         | 0.51 | 0.00 | 0.00 | 0.38 | 0.28 | 5 | B Cell |
| Lsm4          | 0.45 | 0.00 | 0.00 | 0.30 | 0.20 | 5 | B Cell |

|            |      |      |      |      |      |   |        |
|------------|------|------|------|------|------|---|--------|
| AC121131.2 | 0.43 | 0.00 | 0.00 | 0.47 | 0.40 | 5 | B Cell |
| Gm17511    | 0.31 | 0.00 | 0.00 | 0.66 | 0.61 | 5 | B Cell |
| Hnrnpa2b1  | 0.29 | 0.00 | 0.00 | 0.75 | 0.72 | 5 | B Cell |
| Msn        | 0.34 | 0.00 | 0.00 | 0.52 | 0.43 | 5 | B Cell |
| Gas5       | 0.34 | 0.00 | 0.00 | 0.60 | 0.53 | 5 | B Cell |
| Pgls       | 0.50 | 0.00 | 0.00 | 0.25 | 0.17 | 5 | B Cell |
| Stk38      | 0.46 | 0.00 | 0.00 | 0.29 | 0.20 | 5 | B Cell |
| Grb2       | 0.47 | 0.00 | 0.00 | 0.26 | 0.18 | 5 | B Cell |
| Set        | 0.48 | 0.00 | 0.00 | 0.41 | 0.34 | 5 | B Cell |
| Gm10222    | 0.37 | 0.00 | 0.00 | 0.50 | 0.43 | 5 | B Cell |
| Gm7808     | 0.28 | 0.00 | 0.00 | 0.66 | 0.60 | 5 | B Cell |
| Rbm3       | 0.38 | 0.00 | 0.00 | 0.48 | 0.41 | 5 | B Cell |
| Yeats4     | 0.47 | 0.00 | 0.00 | 0.27 | 0.19 | 5 | B Cell |
| Akap13     | 0.46 | 0.00 | 0.00 | 0.35 | 0.27 | 5 | B Cell |
| Cdc42se1   | 0.43 | 0.00 | 0.00 | 0.28 | 0.19 | 5 | B Cell |
| Zfp106     | 0.43 | 0.00 | 0.00 | 0.28 | 0.20 | 5 | B Cell |
| Xrn2       | 0.44 | 0.00 | 0.00 | 0.37 | 0.30 | 5 | B Cell |
| Rpl9       | 0.26 | 0.00 | 0.00 | 0.66 | 0.63 | 5 | B Cell |
| Gm5093     | 0.33 | 0.00 | 0.00 | 0.52 | 0.47 | 5 | B Cell |
| Pdpf       | 0.44 | 0.00 | 0.00 | 0.26 | 0.18 | 5 | B Cell |
| Ptpn1      | 0.40 | 0.00 | 0.00 | 0.28 | 0.20 | 5 | B Cell |
| Cep110     | 0.42 | 0.00 | 0.00 | 0.26 | 0.19 | 5 | B Cell |
| Oaz1       | 0.28 | 0.00 | 0.00 | 0.64 | 0.62 | 5 | B Cell |
| mt-Nd4l    | 0.39 | 0.00 | 0.00 | 0.45 | 0.38 | 5 | B Cell |
| Clta       | 0.32 | 0.00 | 0.00 | 0.49 | 0.43 | 5 | B Cell |
| Ivns1abp   | 0.35 | 0.00 | 0.00 | 0.30 | 0.22 | 5 | B Cell |
| Eif5a      | 0.39 | 0.00 | 0.00 | 0.41 | 0.34 | 5 | B Cell |
| Sf3b1      | 0.33 | 0.00 | 0.00 | 0.52 | 0.46 | 5 | B Cell |
| Emp3       | 0.36 | 0.00 | 0.00 | 0.29 | 0.21 | 5 | B Cell |
| Srsf3      | 0.30 | 0.00 | 0.00 | 0.50 | 0.45 | 5 | B Cell |
| Rpl36-ps3  | 0.26 | 0.00 | 0.00 | 0.58 | 0.53 | 5 | B Cell |
| Gdi2       | 0.40 | 0.00 | 0.00 | 0.39 | 0.33 | 5 | B Cell |
| Gm10020    | 0.28 | 0.00 | 0.00 | 0.56 | 0.52 | 5 | B Cell |
| Anp32b     | 0.28 | 0.00 | 0.00 | 0.54 | 0.50 | 5 | B Cell |
| Psme2b     | 0.36 | 0.00 | 0.00 | 0.36 | 0.30 | 5 | B Cell |
| Psme1      | 0.36 | 0.00 | 0.00 | 0.37 | 0.31 | 5 | B Cell |
| mt-Nd3     | 0.28 | 0.00 | 0.00 | 0.51 | 0.48 | 5 | B Cell |
| Taf1d      | 0.40 | 0.00 | 0.00 | 0.29 | 0.23 | 5 | B Cell |
| Hnrnpc     | 0.32 | 0.00 | 0.00 | 0.48 | 0.44 | 5 | B Cell |
| Rps2-ps10  | 0.31 | 0.00 | 0.00 | 0.48 | 0.43 | 5 | B Cell |
| Gm5239     | 0.26 | 0.00 | 0.00 | 0.55 | 0.52 | 5 | B Cell |
| Rrp1       | 0.34 | 0.00 | 0.00 | 0.42 | 0.37 | 5 | B Cell |
| Mbnl1      | 0.32 | 0.00 | 0.00 | 0.33 | 0.27 | 5 | B Cell |

|            |      |      |      |      |      |   |        |
|------------|------|------|------|------|------|---|--------|
| Gm6139     | 0.31 | 0.00 | 0.00 | 0.46 | 0.42 | 5 | B Cell |
| Gtf2f1     | 0.40 | 0.00 | 0.00 | 0.27 | 0.21 | 5 | B Cell |
| Rsl1d1     | 0.39 | 0.00 | 0.00 | 0.33 | 0.27 | 5 | B Cell |
| Eif5       | 0.36 | 0.00 | 0.00 | 0.41 | 0.37 | 5 | B Cell |
| Pa2g4      | 0.42 | 0.00 | 0.00 | 0.31 | 0.26 | 5 | B Cell |
| Fkbp3      | 0.38 | 0.00 | 0.00 | 0.35 | 0.30 | 5 | B Cell |
| Snrpf      | 0.36 | 0.00 | 0.00 | 0.33 | 0.28 | 5 | B Cell |
| Polr1d     | 0.34 | 0.00 | 0.00 | 0.33 | 0.28 | 5 | B Cell |
| Pdia4      | 0.36 | 0.00 | 0.00 | 0.27 | 0.21 | 5 | B Cell |
| Cnbp       | 0.30 | 0.00 | 0.00 | 0.48 | 0.45 | 5 | B Cell |
| Rps2-ps6   | 0.30 | 0.00 | 0.00 | 0.44 | 0.41 | 5 | B Cell |
| Snrpe      | 0.32 | 0.00 | 0.00 | 0.40 | 0.36 | 5 | B Cell |
| Hspd1      | 0.37 | 0.00 | 0.00 | 0.31 | 0.25 | 5 | B Cell |
| Ranbp1     | 0.37 | 0.00 | 0.00 | 0.34 | 0.29 | 5 | B Cell |
| AC167036.1 | 0.33 | 0.00 | 0.00 | 0.35 | 0.30 | 5 | B Cell |
| Ran        | 0.29 | 0.00 | 0.00 | 0.42 | 0.38 | 5 | B Cell |
| Safb2      | 0.37 | 0.00 | 0.00 | 0.29 | 0.24 | 5 | B Cell |
| Tmod3      | 0.37 | 0.00 | 0.00 | 0.31 | 0.26 | 5 | B Cell |
| Hnrnpm     | 0.27 | 0.00 | 0.00 | 0.52 | 0.49 | 5 | B Cell |
| Hnrnpf     | 0.30 | 0.00 | 0.00 | 0.38 | 0.34 | 5 | B Cell |
| Psmb1      | 0.28 | 0.00 | 0.00 | 0.48 | 0.47 | 5 | B Cell |
| Rpl10a-ps2 | 0.30 | 0.00 | 0.00 | 0.33 | 0.29 | 5 | B Cell |
| Eif3c      | 0.25 | 0.00 | 0.00 | 0.50 | 0.48 | 5 | B Cell |
| Ddx46      | 0.29 | 0.00 | 0.00 | 0.34 | 0.30 | 5 | B Cell |
| Atp5a1     | 0.27 | 0.00 | 0.00 | 0.44 | 0.41 | 5 | B Cell |
| Fgfr1op2   | 0.30 | 0.00 | 0.00 | 0.32 | 0.28 | 5 | B Cell |
| Nop10      | 0.33 | 0.00 | 0.00 | 0.32 | 0.28 | 5 | B Cell |
| Eif3e      | 0.27 | 0.00 | 0.00 | 0.43 | 0.40 | 5 | B Cell |
| Kmt2e      | 0.28 | 0.00 | 0.00 | 0.45 | 0.43 | 5 | B Cell |
| Irf2       | 0.34 | 0.00 | 0.00 | 0.28 | 0.24 | 5 | B Cell |
| Psma1      | 0.28 | 0.00 | 0.00 | 0.30 | 0.26 | 5 | B Cell |
| Eif3k      | 0.30 | 0.00 | 0.00 | 0.37 | 0.34 | 5 | B Cell |
| Cct2       | 0.30 | 0.00 | 0.00 | 0.30 | 0.27 | 5 | B Cell |
| Gm15013    | 0.26 | 0.00 | 0.00 | 0.39 | 0.37 | 5 | B Cell |
| mt-Atp8    | 0.31 | 0.00 | 0.00 | 0.31 | 0.28 | 5 | B Cell |
| Gm10126    | 0.25 | 0.00 | 0.01 | 0.42 | 0.40 | 5 | B Cell |
| Cct5       | 0.32 | 0.00 | 0.01 | 0.27 | 0.23 | 5 | B Cell |
| Add3       | 0.26 | 0.00 | 0.01 | 0.32 | 0.28 | 5 | B Cell |
| Eef1d      | 0.29 | 0.00 | 0.01 | 0.29 | 0.26 | 5 | B Cell |
| Gm17087    | 0.28 | 0.00 | 0.03 | 0.28 | 0.24 | 5 | B Cell |
| Ms4a4b     | 2.91 | 0.00 | 0.00 | 0.79 | 0.02 | 6 | T Cell |
| Trbc2      | 2.66 | 0.00 | 0.00 | 0.78 | 0.02 | 6 | T Cell |
| Trbc1      | 2.40 | 0.00 | 0.00 | 0.67 | 0.01 | 6 | T Cell |

|          |      |      |      |      |      |   |        |
|----------|------|------|------|------|------|---|--------|
| Cd3d     | 2.08 | 0.00 | 0.00 | 0.59 | 0.01 | 6 | T Cell |
| Cd3g     | 2.07 | 0.00 | 0.00 | 0.62 | 0.01 | 6 | T Cell |
| Ms4a6b   | 1.92 | 0.00 | 0.00 | 0.56 | 0.04 | 6 | T Cell |
| Il7r     | 1.70 | 0.00 | 0.00 | 0.37 | 0.01 | 6 | T Cell |
| Ptprc    | 1.68 | 0.00 | 0.00 | 0.72 | 0.12 | 6 | T Cell |
| Tcf7     | 1.67 | 0.00 | 0.00 | 0.46 | 0.05 | 6 | T Cell |
| Cd52     | 1.63 | 0.00 | 0.00 | 0.86 | 0.17 | 6 | T Cell |
| Ptprcap  | 1.61 | 0.00 | 0.00 | 0.58 | 0.05 | 6 | T Cell |
| Nkg7     | 1.59 | 0.00 | 0.00 | 0.30 | 0.01 | 6 | T Cell |
| AW112010 | 1.55 | 0.00 | 0.00 | 0.31 | 0.03 | 6 | T Cell |
| Lck      | 1.51 | 0.00 | 0.00 | 0.40 | 0.01 | 6 | T Cell |
| Rac2     | 1.51 | 0.00 | 0.00 | 0.61 | 0.09 | 6 | T Cell |
| Shisa5   | 1.41 | 0.00 | 0.00 | 0.64 | 0.19 | 6 | T Cell |
| Ccr7     | 1.41 | 0.00 | 0.00 | 0.30 | 0.02 | 6 | T Cell |
| H2-K1    | 1.39 | 0.00 | 0.00 | 0.81 | 0.30 | 6 | T Cell |
| Thy1     | 1.37 | 0.00 | 0.00 | 0.34 | 0.01 | 6 | T Cell |
| Selpg    | 1.36 | 0.00 | 0.00 | 0.42 | 0.04 | 6 | T Cell |
| Lef1     | 1.32 | 0.00 | 0.00 | 0.32 | 0.03 | 6 | T Cell |
| Hcst     | 1.32 | 0.00 | 0.00 | 0.36 | 0.03 | 6 | T Cell |
| Arhgdib  | 1.32 | 0.00 | 0.00 | 0.65 | 0.14 | 6 | T Cell |
| Cd2      | 1.28 | 0.00 | 0.00 | 0.37 | 0.03 | 6 | T Cell |
| Limd2    | 1.27 | 0.00 | 0.00 | 0.54 | 0.14 | 6 | T Cell |
| Gimap4   | 1.24 | 0.00 | 0.00 | 0.55 | 0.16 | 6 | T Cell |
| Sept1    | 1.23 | 0.00 | 0.00 | 0.36 | 0.03 | 6 | T Cell |
| Cd27     | 1.23 | 0.00 | 0.00 | 0.30 | 0.01 | 6 | T Cell |
| Laptm5   | 1.20 | 0.00 | 0.00 | 0.60 | 0.12 | 6 | T Cell |
| Bcl11b   | 1.19 | 0.00 | 0.00 | 0.28 | 0.01 | 6 | T Cell |
| Cd53     | 1.19 | 0.00 | 0.00 | 0.45 | 0.08 | 6 | T Cell |
| Sp100    | 1.19 | 0.00 | 0.00 | 0.40 | 0.07 | 6 | T Cell |
| Epsti1   | 1.17 | 0.00 | 0.00 | 0.30 | 0.03 | 6 | T Cell |
| Skap1    | 1.17 | 0.00 | 0.00 | 0.31 | 0.01 | 6 | T Cell |
| Il2rg    | 1.13 | 0.00 | 0.00 | 0.41 | 0.09 | 6 | T Cell |
| Sh3kbp1  | 1.13 | 0.00 | 0.00 | 0.40 | 0.09 | 6 | T Cell |
| Cd3e     | 1.12 | 0.00 | 0.00 | 0.28 | 0.01 | 6 | T Cell |
| Sell     | 1.11 | 0.00 | 0.00 | 0.28 | 0.03 | 6 | T Cell |
| Hmha1    | 1.10 | 0.00 | 0.00 | 0.37 | 0.07 | 6 | T Cell |
| Cytip    | 1.09 | 0.00 | 0.00 | 0.39 | 0.08 | 6 | T Cell |
| Gm10275  | 1.07 | 0.00 | 0.00 | 0.90 | 0.65 | 6 | T Cell |
| Lat      | 1.07 | 0.00 | 0.00 | 0.26 | 0.01 | 6 | T Cell |
| Ptpn18   | 1.07 | 0.00 | 0.00 | 0.48 | 0.13 | 6 | T Cell |
| Slfn2    | 1.06 | 0.00 | 0.00 | 0.48 | 0.12 | 6 | T Cell |
| Ms4a4c   | 1.05 | 0.00 | 0.00 | 0.28 | 0.02 | 6 | T Cell |
| Satb1    | 1.02 | 0.00 | 0.00 | 0.25 | 0.03 | 6 | T Cell |

|           |      |      |      |      |      |   |        |
|-----------|------|------|------|------|------|---|--------|
| Dgka      | 1.01 | 0.00 | 0.00 | 0.28 | 0.04 | 6 | T Cell |
| Itgb7     | 1.00 | 0.00 | 0.00 | 0.28 | 0.03 | 6 | T Cell |
| Ltb       | 0.99 | 0.00 | 0.00 | 0.27 | 0.03 | 6 | T Cell |
| Bin2      | 0.96 | 0.00 | 0.00 | 0.28 | 0.04 | 6 | T Cell |
| Rplp0     | 0.95 | 0.00 | 0.00 | 0.97 | 0.83 | 6 | T Cell |
| Gm8730    | 0.94 | 0.00 | 0.00 | 0.97 | 0.81 | 6 | T Cell |
| B2m       | 0.93 | 0.00 | 0.00 | 0.97 | 0.66 | 6 | T Cell |
| Rpsa-ps10 | 0.93 | 0.00 | 0.00 | 0.90 | 0.67 | 6 | T Cell |
| Rpl13a    | 0.89 | 0.00 | 0.00 | 0.98 | 0.86 | 6 | T Cell |
| Rplp1     | 0.87 | 0.00 | 0.00 | 0.98 | 0.89 | 6 | T Cell |
| Rps15a    | 0.86 | 0.00 | 0.00 | 0.97 | 0.81 | 6 | T Cell |
| Gm10073   | 0.85 | 0.00 | 0.00 | 0.97 | 0.85 | 6 | T Cell |
| Rpl32     | 0.82 | 0.00 | 0.00 | 0.97 | 0.84 | 6 | T Cell |
| Rps11     | 0.81 | 0.00 | 0.00 | 0.93 | 0.75 | 6 | T Cell |
| Pabpc1    | 0.81 | 0.00 | 0.00 | 0.95 | 0.80 | 6 | T Cell |
| Wdr89     | 0.81 | 0.00 | 0.00 | 0.98 | 0.88 | 6 | T Cell |
| Rps26     | 0.80 | 0.00 | 0.00 | 0.99 | 0.89 | 6 | T Cell |
| Rps26-ps1 | 0.79 | 0.00 | 0.00 | 0.97 | 0.87 | 6 | T Cell |
| Rps3      | 0.79 | 0.00 | 0.00 | 0.96 | 0.82 | 6 | T Cell |
| Rps16     | 0.78 | 0.00 | 0.00 | 0.97 | 0.83 | 6 | T Cell |
| Rpl4      | 0.76 | 0.00 | 0.00 | 0.97 | 0.83 | 6 | T Cell |
| Rps3a1    | 0.70 | 0.00 | 0.00 | 0.97 | 0.85 | 6 | T Cell |
| Tmsb4x    | 0.67 | 0.00 | 0.00 | 0.99 | 0.88 | 6 | T Cell |
| Rps9      | 0.64 | 0.00 | 0.00 | 0.99 | 0.91 | 6 | T Cell |
| Coro1a    | 0.94 | 0.00 | 0.00 | 0.39 | 0.09 | 6 | T Cell |
| Rps6      | 0.73 | 0.00 | 0.00 | 0.95 | 0.82 | 6 | T Cell |
| Gm6472    | 0.77 | 0.00 | 0.00 | 0.94 | 0.79 | 6 | T Cell |
| Gm9396    | 1.02 | 0.00 | 0.00 | 0.82 | 0.53 | 6 | T Cell |
| Arhgap30  | 0.95 | 0.00 | 0.00 | 0.39 | 0.09 | 6 | T Cell |
| H2-D1     | 0.91 | 0.00 | 0.00 | 0.86 | 0.48 | 6 | T Cell |
| Gm9846    | 0.69 | 0.00 | 0.00 | 0.98 | 0.89 | 6 | T Cell |
| Rpl18a    | 0.75 | 0.00 | 0.00 | 0.96 | 0.82 | 6 | T Cell |
| Rps24     | 0.69 | 0.00 | 0.00 | 0.98 | 0.88 | 6 | T Cell |
| Rplp2     | 0.74 | 0.00 | 0.00 | 0.95 | 0.81 | 6 | T Cell |
| Rps10-ps1 | 0.75 | 0.00 | 0.00 | 0.94 | 0.77 | 6 | T Cell |
| Cotl1     | 1.05 | 0.00 | 0.00 | 0.51 | 0.16 | 6 | T Cell |
| Mndal     | 0.93 | 0.00 | 0.00 | 0.50 | 0.15 | 6 | T Cell |
| Gm9843    | 0.60 | 0.00 | 0.00 | 0.99 | 0.92 | 6 | T Cell |
| Rpl5      | 0.77 | 0.00 | 0.00 | 0.92 | 0.74 | 6 | T Cell |
| Rpl12     | 1.00 | 0.00 | 0.00 | 0.82 | 0.54 | 6 | T Cell |
| Ifi203    | 0.99 | 0.00 | 0.00 | 0.45 | 0.13 | 6 | T Cell |
| Tmsb10    | 0.68 | 0.00 | 0.00 | 0.98 | 0.85 | 6 | T Cell |
| Psmb8     | 0.98 | 0.00 | 0.00 | 0.52 | 0.17 | 6 | T Cell |

|               |      |      |      |      |      |   |        |
|---------------|------|------|------|------|------|---|--------|
| Apbb1ip       | 0.88 | 0.00 | 0.00 | 0.36 | 0.08 | 6 | T Cell |
| Sp110         | 0.91 | 0.00 | 0.00 | 0.30 | 0.06 | 6 | T Cell |
| A430104N18Rik | 0.86 | 0.00 | 0.00 | 0.29 | 0.06 | 6 | T Cell |
| Rps3a2        | 0.67 | 0.00 | 0.00 | 0.95 | 0.82 | 6 | T Cell |
| Fyb           | 0.99 | 0.00 | 0.00 | 0.51 | 0.17 | 6 | T Cell |
| Stk17b        | 0.94 | 0.00 | 0.00 | 0.28 | 0.06 | 6 | T Cell |
| Pdcd4         | 1.14 | 0.00 | 0.00 | 0.55 | 0.21 | 6 | T Cell |
| 6-Sep         | 0.90 | 0.00 | 0.00 | 0.29 | 0.06 | 6 | T Cell |
| Rpl8          | 0.70 | 0.00 | 0.00 | 0.93 | 0.79 | 6 | T Cell |
| Rpsa          | 0.86 | 0.00 | 0.00 | 0.85 | 0.61 | 6 | T Cell |
| Gimap6        | 1.00 | 0.00 | 0.00 | 0.47 | 0.15 | 6 | T Cell |
| Pycard        | 0.94 | 0.00 | 0.00 | 0.33 | 0.08 | 6 | T Cell |
| Rps20         | 0.71 | 0.00 | 0.00 | 0.91 | 0.78 | 6 | T Cell |
| Rps5          | 0.70 | 0.00 | 0.00 | 0.92 | 0.77 | 6 | T Cell |
| Eef1a1        | 0.61 | 0.00 | 0.00 | 0.95 | 0.87 | 6 | T Cell |
| Rps7          | 0.72 | 0.00 | 0.00 | 0.90 | 0.73 | 6 | T Cell |
| Rpl39         | 0.64 | 0.00 | 0.00 | 0.94 | 0.80 | 6 | T Cell |
| Gnb2l1        | 0.76 | 0.00 | 0.00 | 0.85 | 0.64 | 6 | T Cell |
| Gm9493        | 0.71 | 0.00 | 0.00 | 0.90 | 0.74 | 6 | T Cell |
| Eef1b2        | 0.78 | 0.00 | 0.00 | 0.85 | 0.64 | 6 | T Cell |
| Gm11808       | 0.66 | 0.00 | 0.00 | 0.92 | 0.77 | 6 | T Cell |
| Gm2000        | 0.60 | 0.00 | 0.00 | 0.94 | 0.84 | 6 | T Cell |
| Fxyd5         | 0.85 | 0.00 | 0.00 | 0.48 | 0.17 | 6 | T Cell |
| Gm7536        | 0.61 | 0.00 | 0.00 | 0.94 | 0.81 | 6 | T Cell |
| Rpl19         | 0.66 | 0.00 | 0.00 | 0.90 | 0.75 | 6 | T Cell |
| Rpl10a        | 0.68 | 0.00 | 0.00 | 0.89 | 0.74 | 6 | T Cell |
| Rps3a3        | 0.63 | 0.00 | 0.00 | 0.92 | 0.77 | 6 | T Cell |
| Rps14         | 0.52 | 0.00 | 0.00 | 0.99 | 0.92 | 6 | T Cell |
| Rps4x         | 0.55 | 0.00 | 0.00 | 0.96 | 0.86 | 6 | T Cell |
| Gimap9        | 0.89 | 0.00 | 0.00 | 0.28 | 0.07 | 6 | T Cell |
| Rps18         | 0.71 | 0.00 | 0.00 | 0.84 | 0.65 | 6 | T Cell |
| Tmem71        | 0.86 | 0.00 | 0.00 | 0.25 | 0.06 | 6 | T Cell |
| Rpl22         | 0.61 | 0.00 | 0.00 | 0.92 | 0.79 | 6 | T Cell |
| Rps10         | 0.66 | 0.00 | 0.00 | 0.87 | 0.70 | 6 | T Cell |
| Rps21         | 0.64 | 0.00 | 0.00 | 0.91 | 0.75 | 6 | T Cell |
| Rps13         | 0.73 | 0.00 | 0.00 | 0.83 | 0.63 | 6 | T Cell |
| Rpl13         | 0.59 | 0.00 | 0.00 | 0.93 | 0.79 | 6 | T Cell |
| Rpl23         | 0.55 | 0.00 | 0.00 | 0.96 | 0.86 | 6 | T Cell |
| Gm10288       | 0.60 | 0.00 | 0.00 | 0.91 | 0.78 | 6 | T Cell |
| Rpl3          | 0.72 | 0.00 | 0.00 | 0.82 | 0.62 | 6 | T Cell |
| Gm10269       | 0.61 | 0.00 | 0.00 | 0.92 | 0.79 | 6 | T Cell |
| Rpl6          | 0.52 | 0.00 | 0.00 | 0.95 | 0.87 | 6 | T Cell |
| Rps23         | 0.61 | 0.00 | 0.00 | 0.92 | 0.79 | 6 | T Cell |

|            |      |      |      |      |      |   |        |
|------------|------|------|------|------|------|---|--------|
| Ets1       | 0.92 | 0.00 | 0.00 | 0.55 | 0.24 | 6 | T Cell |
| Gmfg       | 0.85 | 0.00 | 0.00 | 0.39 | 0.13 | 6 | T Cell |
| Rpl14      | 0.57 | 0.00 | 0.00 | 0.93 | 0.83 | 6 | T Cell |
| Rpl23a-ps3 | 0.61 | 0.00 | 0.00 | 0.90 | 0.74 | 6 | T Cell |
| Fau        | 0.52 | 0.00 | 0.00 | 0.96 | 0.86 | 6 | T Cell |
| Rps27      | 0.59 | 0.00 | 0.00 | 0.94 | 0.81 | 6 | T Cell |
| Actb       | 0.51 | 0.00 | 0.00 | 1.00 | 0.98 | 6 | T Cell |
| Rps28      | 0.58 | 0.00 | 0.00 | 0.95 | 0.83 | 6 | T Cell |
| Gm10036    | 0.60 | 0.00 | 0.00 | 0.89 | 0.74 | 6 | T Cell |
| Gm10335    | 0.59 | 0.00 | 0.00 | 0.89 | 0.72 | 6 | T Cell |
| Rpl34      | 0.56 | 0.00 | 0.00 | 0.93 | 0.79 | 6 | T Cell |
| Rps29      | 0.55 | 0.00 | 0.00 | 0.97 | 0.90 | 6 | T Cell |
| Cd37       | 0.57 | 0.00 | 0.00 | 0.28 | 0.07 | 6 | T Cell |
| Gm10263    | 0.64 | 0.00 | 0.00 | 0.90 | 0.76 | 6 | T Cell |
| Rpl35      | 0.54 | 0.00 | 0.00 | 0.91 | 0.80 | 6 | T Cell |
| Gm10132    | 0.57 | 0.00 | 0.00 | 0.88 | 0.72 | 6 | T Cell |
| Rpl27-ps3  | 0.57 | 0.00 | 0.00 | 0.90 | 0.76 | 6 | T Cell |
| Rpl13a-ps1 | 0.76 | 0.00 | 0.00 | 0.75 | 0.54 | 6 | T Cell |
| Rpl13-ps3  | 0.56 | 0.00 | 0.00 | 0.89 | 0.75 | 6 | T Cell |
| Rpl27a     | 0.54 | 0.00 | 0.00 | 0.91 | 0.78 | 6 | T Cell |
| Rpl9-ps6   | 0.58 | 0.00 | 0.00 | 0.86 | 0.73 | 6 | T Cell |
| Gm17511    | 0.71 | 0.00 | 0.00 | 0.80 | 0.60 | 6 | T Cell |
| Lcp1       | 0.74 | 0.00 | 0.00 | 0.50 | 0.22 | 6 | T Cell |
| Jak1       | 0.91 | 0.00 | 0.00 | 0.51 | 0.24 | 6 | T Cell |
| Rpl18      | 0.64 | 0.00 | 0.00 | 0.81 | 0.63 | 6 | T Cell |
| Emb        | 0.80 | 0.00 | 0.00 | 0.32 | 0.10 | 6 | T Cell |
| Rpl41      | 0.38 | 0.00 | 0.00 | 0.98 | 0.95 | 6 | T Cell |
| Lrrc58     | 0.54 | 0.00 | 0.00 | 0.97 | 0.91 | 6 | T Cell |
| Rapgef6    | 0.96 | 0.00 | 0.00 | 0.35 | 0.13 | 6 | T Cell |
| Rps15      | 0.53 | 0.00 | 0.00 | 0.91 | 0.78 | 6 | T Cell |
| Mbnl1      | 0.87 | 0.00 | 0.00 | 0.51 | 0.26 | 6 | T Cell |
| Rps25      | 0.50 | 0.00 | 0.00 | 0.91 | 0.80 | 6 | T Cell |
| Rps18-ps3  | 0.66 | 0.00 | 0.00 | 0.75 | 0.55 | 6 | T Cell |
| Gm5428     | 0.50 | 0.00 | 0.00 | 0.90 | 0.78 | 6 | T Cell |
| Rpl23a     | 0.56 | 0.00 | 0.00 | 0.82 | 0.66 | 6 | T Cell |
| Lsp1       | 0.59 | 0.00 | 0.00 | 0.45 | 0.18 | 6 | T Cell |
| Gimap1     | 0.73 | 0.00 | 0.00 | 0.36 | 0.13 | 6 | T Cell |
| Gm10260    | 0.70 | 0.00 | 0.00 | 0.69 | 0.48 | 6 | T Cell |
| Actr3      | 0.75 | 0.00 | 0.00 | 0.57 | 0.32 | 6 | T Cell |
| Crif3      | 0.87 | 0.00 | 0.00 | 0.34 | 0.13 | 6 | T Cell |
| Rgs10      | 0.82 | 0.00 | 0.00 | 0.28 | 0.09 | 6 | T Cell |
| Pfn1       | 0.72 | 0.00 | 0.00 | 0.67 | 0.46 | 6 | T Cell |
| Rpl27      | 0.51 | 0.00 | 0.00 | 0.84 | 0.69 | 6 | T Cell |

|            |      |      |      |      |      |   |        |
|------------|------|------|------|------|------|---|--------|
| Leprotl1   | 0.79 | 0.00 | 0.00 | 0.35 | 0.14 | 6 | T Cell |
| Rpl7       | 0.52 | 0.00 | 0.00 | 0.87 | 0.74 | 6 | T Cell |
| Rpl35a     | 0.48 | 0.00 | 0.00 | 0.89 | 0.79 | 6 | T Cell |
| Smc4       | 0.93 | 0.00 | 0.00 | 0.57 | 0.34 | 6 | T Cell |
| Sh3bgrl3   | 0.70 | 0.00 | 0.00 | 0.58 | 0.34 | 6 | T Cell |
| Gm7589     | 0.53 | 0.00 | 0.00 | 0.80 | 0.65 | 6 | T Cell |
| Npm1       | 0.62 | 0.00 | 0.00 | 0.75 | 0.57 | 6 | T Cell |
| Gm10076    | 0.36 | 0.00 | 0.00 | 0.96 | 0.92 | 6 | T Cell |
| Elf1       | 0.80 | 0.00 | 0.00 | 0.41 | 0.20 | 6 | T Cell |
| Itga4      | 0.73 | 0.00 | 0.00 | 0.26 | 0.09 | 6 | T Cell |
| Atp1b3     | 0.74 | 0.00 | 0.00 | 0.47 | 0.25 | 6 | T Cell |
| Rpl26      | 0.43 | 0.00 | 0.00 | 0.90 | 0.81 | 6 | T Cell |
| Rpl37      | 0.43 | 0.00 | 0.00 | 0.90 | 0.80 | 6 | T Cell |
| Rpl15      | 0.56 | 0.00 | 0.00 | 0.73 | 0.58 | 6 | T Cell |
| Srpk1      | 0.76 | 0.00 | 0.00 | 0.30 | 0.12 | 6 | T Cell |
| Rpl11      | 0.51 | 0.00 | 0.00 | 0.79 | 0.67 | 6 | T Cell |
| Rps27a     | 0.44 | 0.00 | 0.00 | 0.87 | 0.76 | 6 | T Cell |
| Gm7808     | 0.56 | 0.00 | 0.00 | 0.75 | 0.59 | 6 | T Cell |
| Arpc2      | 0.51 | 0.00 | 0.00 | 0.79 | 0.61 | 6 | T Cell |
| Ifi27l2a   | 0.85 | 0.00 | 0.00 | 0.25 | 0.09 | 6 | T Cell |
| Rps12-ps3  | 0.44 | 0.00 | 0.00 | 0.88 | 0.78 | 6 | T Cell |
| Gm10020    | 0.60 | 0.00 | 0.00 | 0.68 | 0.51 | 6 | T Cell |
| Tpt1       | 0.36 | 0.00 | 0.00 | 0.95 | 0.88 | 6 | T Cell |
| Ablim1     | 0.71 | 0.00 | 0.00 | 0.46 | 0.24 | 6 | T Cell |
| Rps2       | 0.50 | 0.00 | 0.00 | 0.79 | 0.67 | 6 | T Cell |
| Gm5239     | 0.60 | 0.00 | 0.00 | 0.68 | 0.51 | 6 | T Cell |
| Mir682     | 0.38 | 0.00 | 0.00 | 0.93 | 0.85 | 6 | T Cell |
| S100a10    | 0.77 | 0.00 | 0.00 | 0.57 | 0.38 | 6 | T Cell |
| Rps17      | 0.42 | 0.00 | 0.00 | 0.85 | 0.77 | 6 | T Cell |
| Rpl30      | 0.55 | 0.00 | 0.00 | 0.72 | 0.58 | 6 | T Cell |
| Rps19      | 0.35 | 0.00 | 0.00 | 0.92 | 0.82 | 6 | T Cell |
| Fkbp3      | 0.74 | 0.00 | 0.00 | 0.49 | 0.29 | 6 | T Cell |
| AC121131.2 | 0.63 | 0.00 | 0.00 | 0.57 | 0.39 | 6 | T Cell |
| AC123611.1 | 0.63 | 0.00 | 0.00 | 0.56 | 0.39 | 6 | T Cell |
| Rpl9       | 0.48 | 0.00 | 0.00 | 0.74 | 0.62 | 6 | T Cell |
| Rpl17      | 0.55 | 0.00 | 0.00 | 0.69 | 0.53 | 6 | T Cell |
| Srgn       | 0.49 | 0.00 | 0.00 | 0.56 | 0.32 | 6 | T Cell |
| Gvin1      | 0.60 | 0.00 | 0.00 | 0.27 | 0.11 | 6 | T Cell |
| Rps8       | 0.37 | 0.00 | 0.00 | 0.89 | 0.81 | 6 | T Cell |
| Orc5       | 0.51 | 0.00 | 0.00 | 0.69 | 0.55 | 6 | T Cell |
| Rpl37a     | 0.33 | 0.00 | 0.00 | 0.90 | 0.83 | 6 | T Cell |
| Cdk2ap2    | 0.62 | 0.00 | 0.00 | 0.31 | 0.15 | 6 | T Cell |
| Rpl36a     | 0.46 | 0.00 | 0.00 | 0.74 | 0.62 | 6 | T Cell |

|            |      |      |      |      |      |   |        |
|------------|------|------|------|------|------|---|--------|
| Gm4070     | 0.60 | 0.00 | 0.00 | 0.27 | 0.11 | 6 | T Cell |
| Gimap5     | 0.58 | 0.00 | 0.00 | 0.26 | 0.11 | 6 | T Cell |
| Rpl36      | 0.43 | 0.00 | 0.00 | 0.76 | 0.63 | 6 | T Cell |
| Rpl22l1    | 0.48 | 0.00 | 0.00 | 0.69 | 0.56 | 6 | T Cell |
| Samhd1     | 0.58 | 0.00 | 0.00 | 0.36 | 0.19 | 6 | T Cell |
| Gltscr2    | 0.52 | 0.00 | 0.00 | 0.63 | 0.47 | 6 | T Cell |
| Nt5c       | 0.59 | 0.00 | 0.00 | 0.30 | 0.15 | 6 | T Cell |
| Ldha       | 0.59 | 0.00 | 0.00 | 0.45 | 0.29 | 6 | T Cell |
| Rpl38      | 0.36 | 0.00 | 0.00 | 0.82 | 0.73 | 6 | T Cell |
| Bzw2       | 0.64 | 0.00 | 0.00 | 0.29 | 0.14 | 6 | T Cell |
| Arpc1b     | 0.48 | 0.00 | 0.00 | 0.53 | 0.37 | 6 | T Cell |
| Rpl21      | 0.36 | 0.00 | 0.00 | 0.85 | 0.75 | 6 | T Cell |
| Rps12      | 0.38 | 0.00 | 0.00 | 0.77 | 0.68 | 6 | T Cell |
| Rpl28      | 0.45 | 0.00 | 0.00 | 0.65 | 0.53 | 6 | T Cell |
| Stk4       | 0.62 | 0.00 | 0.00 | 0.27 | 0.14 | 6 | T Cell |
| Psme2b     | 0.54 | 0.00 | 0.00 | 0.45 | 0.29 | 6 | T Cell |
| Ccnd2      | 0.52 | 0.00 | 0.00 | 0.45 | 0.28 | 6 | T Cell |
| H2-T23     | 0.53 | 0.00 | 0.00 | 0.25 | 0.12 | 6 | T Cell |
| Naca       | 0.42 | 0.00 | 0.00 | 0.68 | 0.57 | 6 | T Cell |
| Gm5611     | 0.51 | 0.00 | 0.00 | 0.49 | 0.35 | 6 | T Cell |
| Psme1      | 0.53 | 0.00 | 0.00 | 0.46 | 0.31 | 6 | T Cell |
| Rpl36al    | 0.42 | 0.00 | 0.00 | 0.64 | 0.52 | 6 | T Cell |
| Serbp1     | 0.36 | 0.00 | 0.00 | 0.81 | 0.74 | 6 | T Cell |
| Eef1g      | 0.45 | 0.00 | 0.00 | 0.60 | 0.48 | 6 | T Cell |
| Gm10126    | 0.55 | 0.00 | 0.00 | 0.52 | 0.39 | 6 | T Cell |
| Eif3e      | 0.47 | 0.00 | 0.00 | 0.53 | 0.40 | 6 | T Cell |
| Arpc5      | 0.42 | 0.00 | 0.00 | 0.66 | 0.56 | 6 | T Cell |
| Tmem66     | 0.56 | 0.00 | 0.00 | 0.33 | 0.20 | 6 | T Cell |
| AC167036.1 | 0.56 | 0.00 | 0.00 | 0.42 | 0.30 | 6 | T Cell |
| mt-Nd5     | 0.33 | 0.00 | 0.00 | 0.83 | 0.75 | 6 | T Cell |
| Gm17541    | 0.54 | 0.00 | 0.00 | 0.30 | 0.18 | 6 | T Cell |
| Gm5093     | 0.43 | 0.00 | 0.00 | 0.58 | 0.46 | 6 | T Cell |
| Eno1       | 0.47 | 0.00 | 0.00 | 0.28 | 0.16 | 6 | T Cell |
| Ncl        | 0.31 | 0.00 | 0.00 | 0.84 | 0.78 | 6 | T Cell |
| mt-Atp6    | 0.25 | 0.00 | 0.00 | 0.90 | 0.84 | 6 | T Cell |
| Klf2       | 0.46 | 0.00 | 0.00 | 0.33 | 0.19 | 6 | T Cell |
| Nme1       | 0.48 | 0.00 | 0.00 | 0.31 | 0.19 | 6 | T Cell |
| Rpl36-ps3  | 0.35 | 0.00 | 0.00 | 0.64 | 0.53 | 6 | T Cell |
| Cd47       | 0.44 | 0.00 | 0.00 | 0.55 | 0.43 | 6 | T Cell |
| Psme2      | 0.47 | 0.00 | 0.00 | 0.36 | 0.23 | 6 | T Cell |
| Crip1      | 0.29 | 0.00 | 0.00 | 0.62 | 0.47 | 6 | T Cell |
| Stk38      | 0.55 | 0.00 | 0.00 | 0.31 | 0.20 | 6 | T Cell |
| Cfl1       | 0.36 | 0.00 | 0.00 | 0.67 | 0.58 | 6 | T Cell |

|          |      |      |      |      |      |   |        |
|----------|------|------|------|------|------|---|--------|
| Emg1     | 0.47 | 0.00 | 0.00 | 0.26 | 0.15 | 6 | T Cell |
| Eif3h    | 0.45 | 0.00 | 0.00 | 0.46 | 0.35 | 6 | T Cell |
| Snrpf    | 0.44 | 0.00 | 0.00 | 0.40 | 0.28 | 6 | T Cell |
| Akap13   | 0.46 | 0.00 | 0.00 | 0.38 | 0.27 | 6 | T Cell |
| Abrac1   | 0.47 | 0.00 | 0.00 | 0.35 | 0.23 | 6 | T Cell |
| Eef2     | 0.36 | 0.00 | 0.00 | 0.64 | 0.57 | 6 | T Cell |
| Sec11c   | 0.45 | 0.00 | 0.00 | 0.29 | 0.17 | 6 | T Cell |
| Xrn2     | 0.52 | 0.00 | 0.00 | 0.40 | 0.30 | 6 | T Cell |
| Mif      | 0.46 | 0.00 | 0.00 | 0.29 | 0.18 | 6 | T Cell |
| Emp3     | 0.40 | 0.00 | 0.00 | 0.33 | 0.21 | 6 | T Cell |
| Rpl31    | 0.32 | 0.00 | 0.00 | 0.67 | 0.58 | 6 | T Cell |
| Ddx5     | 0.30 | 0.00 | 0.00 | 0.77 | 0.70 | 6 | T Cell |
| Gm24865  | 0.32 | 0.00 | 0.00 | 0.69 | 0.63 | 6 | T Cell |
| Anp32a   | 0.26 | 0.00 | 0.00 | 0.70 | 0.60 | 6 | T Cell |
| Rpl29    | 0.37 | 0.00 | 0.00 | 0.54 | 0.46 | 6 | T Cell |
| Gas5     | 0.31 | 0.00 | 0.00 | 0.62 | 0.53 | 6 | T Cell |
| Gm22758  | 0.25 | 0.00 | 0.00 | 0.76 | 0.69 | 6 | T Cell |
| Sf3b1    | 0.40 | 0.00 | 0.00 | 0.55 | 0.46 | 6 | T Cell |
| Hnrnpf   | 0.41 | 0.00 | 0.00 | 0.44 | 0.34 | 6 | T Cell |
| Tpm3-rs7 | 0.25 | 0.00 | 0.00 | 0.76 | 0.69 | 6 | T Cell |
| Oaz1     | 0.31 | 0.00 | 0.00 | 0.67 | 0.62 | 6 | T Cell |
| Trp53    | 0.42 | 0.00 | 0.00 | 0.25 | 0.16 | 6 | T Cell |
| Gm8186   | 0.35 | 0.00 | 0.00 | 0.48 | 0.39 | 6 | T Cell |
| Nop10    | 0.42 | 0.00 | 0.00 | 0.37 | 0.27 | 6 | T Cell |
| Gm3940   | 0.37 | 0.00 | 0.00 | 0.45 | 0.36 | 6 | T Cell |
| Gm5244   | 0.47 | 0.00 | 0.00 | 0.37 | 0.28 | 6 | T Cell |
| Add3     | 0.37 | 0.00 | 0.00 | 0.38 | 0.28 | 6 | T Cell |
| Gm15013  | 0.39 | 0.00 | 0.00 | 0.45 | 0.37 | 6 | T Cell |
| Ddx21    | 0.43 | 0.00 | 0.00 | 0.35 | 0.26 | 6 | T Cell |
| Hspe1    | 0.40 | 0.00 | 0.00 | 0.37 | 0.28 | 6 | T Cell |
| Snrpg    | 0.34 | 0.00 | 0.00 | 0.47 | 0.39 | 6 | T Cell |
| Gm17087  | 0.41 | 0.00 | 0.00 | 0.33 | 0.24 | 6 | T Cell |
| Cep110   | 0.48 | 0.00 | 0.00 | 0.27 | 0.19 | 6 | T Cell |
| Eif3m    | 0.37 | 0.00 | 0.00 | 0.33 | 0.24 | 6 | T Cell |
| Fgfr1op2 | 0.39 | 0.00 | 0.00 | 0.36 | 0.28 | 6 | T Cell |
| Snrpd3   | 0.37 | 0.00 | 0.00 | 0.40 | 0.32 | 6 | T Cell |
| Cox7a2l  | 0.34 | 0.00 | 0.00 | 0.49 | 0.41 | 6 | T Cell |
| Btf3     | 0.30 | 0.00 | 0.00 | 0.58 | 0.51 | 6 | T Cell |
| Rnaset2a | 0.38 | 0.00 | 0.00 | 0.35 | 0.26 | 6 | T Cell |
| Tsc22d4  | 0.37 | 0.00 | 0.00 | 0.36 | 0.27 | 6 | T Cell |
| Cdc42se1 | 0.42 | 0.00 | 0.00 | 0.28 | 0.19 | 6 | T Cell |
| Rps2-ps6 | 0.31 | 0.00 | 0.00 | 0.48 | 0.41 | 6 | T Cell |
| Gm8226   | 0.34 | 0.00 | 0.00 | 0.47 | 0.40 | 6 | T Cell |

|               |      |      |      |      |      |   |        |
|---------------|------|------|------|------|------|---|--------|
| Tpr           | 0.32 | 0.00 | 0.00 | 0.57 | 0.49 | 6 | T Cell |
| Nop58         | 0.36 | 0.00 | 0.00 | 0.34 | 0.26 | 6 | T Cell |
| Cdkn1b        | 0.43 | 0.00 | 0.00 | 0.29 | 0.21 | 6 | T Cell |
| Rps2-ps10     | 0.31 | 0.00 | 0.00 | 0.49 | 0.43 | 6 | T Cell |
| Psm2          | 0.32 | 0.00 | 0.00 | 0.50 | 0.44 | 6 | T Cell |
| Gm6133        | 0.36 | 0.00 | 0.00 | 0.41 | 0.34 | 6 | T Cell |
| Eif3k         | 0.35 | 0.00 | 0.00 | 0.41 | 0.34 | 6 | T Cell |
| Dusp11        | 0.37 | 0.00 | 0.00 | 0.33 | 0.25 | 6 | T Cell |
| Rpl10a-ps2    | 0.31 | 0.00 | 0.00 | 0.36 | 0.28 | 6 | T Cell |
| Pkm           | 0.38 | 0.00 | 0.00 | 0.30 | 0.22 | 6 | T Cell |
| Rpl21-ps6     | 0.28 | 0.00 | 0.00 | 0.50 | 0.43 | 6 | T Cell |
| Tspo          | 0.34 | 0.00 | 0.00 | 0.33 | 0.26 | 6 | T Cell |
| Btg1          | 0.34 | 0.00 | 0.00 | 0.36 | 0.28 | 6 | T Cell |
| Nop56         | 0.37 | 0.00 | 0.00 | 0.27 | 0.20 | 6 | T Cell |
| Ifngr1        | 0.41 | 0.00 | 0.00 | 0.31 | 0.24 | 6 | T Cell |
| Rnaset2b      | 0.37 | 0.00 | 0.00 | 0.33 | 0.26 | 6 | T Cell |
| Ddx46         | 0.34 | 0.00 | 0.00 | 0.37 | 0.30 | 6 | T Cell |
| Rbm3          | 0.30 | 0.00 | 0.00 | 0.47 | 0.41 | 6 | T Cell |
| Mdh1          | 0.33 | 0.00 | 0.00 | 0.26 | 0.19 | 6 | T Cell |
| Ppp1ca        | 0.32 | 0.00 | 0.00 | 0.40 | 0.33 | 6 | T Cell |
| Gm6139        | 0.29 | 0.00 | 0.00 | 0.47 | 0.42 | 6 | T Cell |
| Lsm4          | 0.33 | 0.00 | 0.00 | 0.28 | 0.20 | 6 | T Cell |
| Polr1d        | 0.34 | 0.00 | 0.00 | 0.35 | 0.28 | 6 | T Cell |
| Lrrfip1       | 0.35 | 0.00 | 0.00 | 0.32 | 0.25 | 6 | T Cell |
| Eif3i         | 0.30 | 0.00 | 0.00 | 0.29 | 0.22 | 6 | T Cell |
| Gm5786        | 0.28 | 0.00 | 0.00 | 0.44 | 0.39 | 6 | T Cell |
| Actr2         | 0.28 | 0.00 | 0.00 | 0.34 | 0.27 | 6 | T Cell |
| Eif3f         | 0.32 | 0.00 | 0.00 | 0.42 | 0.36 | 6 | T Cell |
| Ncor1         | 0.33 | 0.00 | 0.00 | 0.45 | 0.40 | 6 | T Cell |
| Cnbp          | 0.29 | 0.00 | 0.00 | 0.49 | 0.45 | 6 | T Cell |
| Uqcrh         | 0.25 | 0.00 | 0.00 | 0.52 | 0.47 | 6 | T Cell |
| Tma7          | 0.30 | 0.00 | 0.00 | 0.38 | 0.32 | 6 | T Cell |
| Pak2          | 0.31 | 0.00 | 0.00 | 0.35 | 0.29 | 6 | T Cell |
| Rpl21-ps4     | 0.29 | 0.00 | 0.00 | 0.40 | 0.35 | 6 | T Cell |
| Gm16477       | 0.26 | 0.00 | 0.00 | 0.43 | 0.39 | 6 | T Cell |
| G3bp2         | 0.25 | 0.00 | 0.00 | 0.37 | 0.31 | 6 | T Cell |
| Smek2         | 0.32 | 0.00 | 0.00 | 0.27 | 0.22 | 6 | T Cell |
| Top2b         | 0.31 | 0.00 | 0.00 | 0.32 | 0.27 | 6 | T Cell |
| Spcs2         | 0.26 | 0.00 | 0.00 | 0.36 | 0.31 | 6 | T Cell |
| Ppp2r5c       | 0.29 | 0.00 | 0.00 | 0.26 | 0.21 | 6 | T Cell |
| Thrap3        | 0.29 | 0.00 | 0.00 | 0.41 | 0.37 | 6 | T Cell |
| Rsl1d1        | 0.30 | 0.00 | 0.00 | 0.32 | 0.27 | 6 | T Cell |
| 2810474O19Rik | 0.34 | 0.00 | 0.00 | 0.31 | 0.26 | 6 | T Cell |

|         |      |      |      |      |      |   |             |
|---------|------|------|------|------|------|---|-------------|
| Gm6576  | 0.27 | 0.00 | 0.00 | 0.36 | 0.31 | 6 | T Cell      |
| Gm17669 | 0.32 | 0.00 | 0.00 | 0.27 | 0.22 | 6 | T Cell      |
| Cct2    | 0.28 | 0.00 | 0.00 | 0.31 | 0.27 | 6 | T Cell      |
| Cdc37   | 0.25 | 0.00 | 0.00 | 0.32 | 0.28 | 6 | T Cell      |
| Itsn2   | 0.25 | 0.00 | 0.01 | 0.29 | 0.25 | 6 | T Cell      |
| Rsb1l   | 0.32 | 0.00 | 0.03 | 0.29 | 0.25 | 6 | T Cell      |
| Car4    | 2.74 | 0.00 | 0.00 | 0.88 | 0.05 | 7 | Endothelial |
| Kdr     | 2.43 | 0.00 | 0.00 | 0.94 | 0.14 | 7 | Endothelial |
| Kitl    | 2.42 | 0.00 | 0.00 | 0.95 | 0.20 | 7 | Endothelial |
| Ednrb   | 2.25 | 0.00 | 0.00 | 0.86 | 0.13 | 7 | Endothelial |
| Scn7a   | 2.13 | 0.00 | 0.00 | 1.00 | 0.27 | 7 | Endothelial |
| Cyp4b1  | 2.13 | 0.00 | 0.00 | 0.76 | 0.09 | 7 | Endothelial |
| Apln    | 2.03 | 0.00 | 0.00 | 0.64 | 0.03 | 7 | Endothelial |
| Pmp22   | 1.95 | 0.00 | 0.00 | 0.92 | 0.29 | 7 | Endothelial |
| Igfbp7  | 1.94 | 0.00 | 0.00 | 0.96 | 0.37 | 7 | Endothelial |
| Cldn5   | 1.89 | 0.00 | 0.00 | 0.91 | 0.20 | 7 | Endothelial |
| Tspan13 | 1.89 | 0.00 | 0.00 | 0.92 | 0.23 | 7 | Endothelial |
| Ly6a    | 1.78 | 0.00 | 0.00 | 0.84 | 0.17 | 7 | Endothelial |
| Tbx3    | 1.76 | 0.00 | 0.00 | 0.85 | 0.18 | 7 | Endothelial |
| Clec1a  | 1.73 | 0.00 | 0.00 | 0.81 | 0.14 | 7 | Endothelial |
| Ecscr   | 1.72 | 0.00 | 0.00 | 0.80 | 0.15 | 7 | Endothelial |
| Prx     | 1.69 | 0.00 | 0.00 | 0.67 | 0.08 | 7 | Endothelial |
| Mest    | 1.64 | 0.00 | 0.00 | 0.78 | 0.18 | 7 | Endothelial |
| Cdh5    | 1.63 | 0.00 | 0.00 | 0.88 | 0.21 | 7 | Endothelial |
| Icam2   | 1.62 | 0.00 | 0.00 | 0.74 | 0.14 | 7 | Endothelial |
| Egfl7   | 1.54 | 0.00 | 0.00 | 0.95 | 0.25 | 7 | Endothelial |
| Nrp1    | 1.53 | 0.00 | 0.00 | 0.92 | 0.37 | 7 | Endothelial |
| Cd34    | 1.52 | 0.00 | 0.00 | 0.74 | 0.18 | 7 | Endothelial |
| Sema6a  | 1.51 | 0.00 | 0.00 | 0.61 | 0.10 | 7 | Endothelial |
| Myct1   | 1.49 | 0.00 | 0.00 | 0.68 | 0.11 | 7 | Endothelial |
| Tmem100 | 1.48 | 0.00 | 0.00 | 0.94 | 0.28 | 7 | Endothelial |
| Hpgd    | 1.48 | 0.00 | 0.00 | 0.88 | 0.24 | 7 | Endothelial |
| Stmn2   | 1.46 | 0.00 | 0.00 | 0.72 | 0.13 | 7 | Endothelial |
| Ehd4    | 1.43 | 0.00 | 0.00 | 0.84 | 0.26 | 7 | Endothelial |
| Nhlrc2  | 1.42 | 0.00 | 0.00 | 0.50 | 0.07 | 7 | Endothelial |
| Fendrr  | 1.42 | 0.00 | 0.00 | 0.75 | 0.18 | 7 | Endothelial |
| Acvrl1  | 1.42 | 0.00 | 0.00 | 0.69 | 0.16 | 7 | Endothelial |
| Cyth3   | 1.42 | 0.00 | 0.00 | 0.74 | 0.23 | 7 | Endothelial |
| Rgs12   | 1.41 | 0.00 | 0.00 | 0.60 | 0.10 | 7 | Endothelial |
| Emp2    | 1.41 | 0.00 | 0.00 | 0.90 | 0.33 | 7 | Endothelial |
| Ramp2   | 1.39 | 0.00 | 0.00 | 0.91 | 0.26 | 7 | Endothelial |
| Lphn2   | 1.38 | 0.00 | 0.00 | 0.60 | 0.12 | 7 | Endothelial |
| Pecam1  | 1.35 | 0.00 | 0.00 | 0.83 | 0.22 | 7 | Endothelial |

|               |       |      |      |      |      |      |   |             |
|---------------|-------|------|------|------|------|------|---|-------------|
| Fmo1          |       | 1.35 | 0.00 | 0.00 | 0.58 | 0.10 | 7 | Endothelial |
| Flt1          |       | 1.35 | 0.00 | 0.00 | 0.67 | 0.14 | 7 | Endothelial |
| Piezo2        |       | 1.32 | 0.00 | 0.00 | 0.55 | 0.10 | 7 | Endothelial |
| Pcdh17        |       | 1.32 | 0.00 | 0.00 | 0.74 | 0.19 | 7 | Endothelial |
|               | 4-Sep | 1.32 | 0.00 | 0.00 | 0.74 | 0.21 | 7 | Endothelial |
| Pcdh1         |       | 1.31 | 0.00 | 0.00 | 0.44 | 0.06 | 7 | Endothelial |
| Tmem47        |       | 1.31 | 0.00 | 0.00 | 0.48 | 0.09 | 7 | Endothelial |
| S1pr1         |       | 1.30 | 0.00 | 0.00 | 0.67 | 0.17 | 7 | Endothelial |
| Gpr116        |       | 1.29 | 0.00 | 0.00 | 0.92 | 0.36 | 7 | Endothelial |
| Fkbp1a        |       | 1.29 | 0.00 | 0.00 | 0.86 | 0.39 | 7 | Endothelial |
| Ly6c1         |       | 1.29 | 0.00 | 0.00 | 0.66 | 0.17 | 7 | Endothelial |
| Pcdha2        |       | 1.28 | 0.00 | 0.00 | 0.29 | 0.02 | 7 | Endothelial |
| Ctla2a        |       | 1.28 | 0.00 | 0.00 | 0.73 | 0.19 | 7 | Endothelial |
| Tspan7        |       | 1.27 | 0.00 | 0.00 | 0.77 | 0.19 | 7 | Endothelial |
| Tmem204       |       | 1.27 | 0.00 | 0.00 | 0.57 | 0.14 | 7 | Endothelial |
| Dusp3         |       | 1.26 | 0.00 | 0.00 | 0.64 | 0.18 | 7 | Endothelial |
| Ahr           |       | 1.26 | 0.00 | 0.00 | 0.50 | 0.08 | 7 | Endothelial |
| Thbd          |       | 1.26 | 0.00 | 0.00 | 0.76 | 0.23 | 7 | Endothelial |
| Calcr1        |       | 1.25 | 0.00 | 0.00 | 0.82 | 0.23 | 7 | Endothelial |
| Slc9a3r2      |       | 1.23 | 0.00 | 0.00 | 0.69 | 0.19 | 7 | Endothelial |
| Ppap2a        |       | 1.23 | 0.00 | 0.00 | 0.64 | 0.18 | 7 | Endothelial |
| Tspan18       |       | 1.22 | 0.00 | 0.00 | 0.56 | 0.12 | 7 | Endothelial |
| Esam          |       | 1.22 | 0.00 | 0.00 | 0.67 | 0.16 | 7 | Endothelial |
| Afap1l1       |       | 1.22 | 0.00 | 0.00 | 0.63 | 0.16 | 7 | Endothelial |
| Rtn1          |       | 1.19 | 0.00 | 0.00 | 0.32 | 0.02 | 7 | Endothelial |
| Timp3         |       | 1.19 | 0.00 | 0.00 | 0.80 | 0.35 | 7 | Endothelial |
| Emp1          |       | 1.18 | 0.00 | 0.00 | 0.66 | 0.20 | 7 | Endothelial |
| Ccnd1         |       | 1.17 | 0.00 | 0.00 | 0.60 | 0.18 | 7 | Endothelial |
| Chst1         |       | 1.16 | 0.00 | 0.00 | 0.31 | 0.01 | 7 | Endothelial |
| Ripply3       |       | 1.16 | 0.00 | 0.00 | 0.53 | 0.11 | 7 | Endothelial |
| Sdpr          |       | 1.15 | 0.00 | 0.00 | 0.96 | 0.51 | 7 | Endothelial |
| Ly6e          |       | 1.12 | 0.00 | 0.00 | 0.90 | 0.41 | 7 | Endothelial |
| Klf7          |       | 1.12 | 0.00 | 0.00 | 0.58 | 0.17 | 7 | Endothelial |
| Nostrin       |       | 1.11 | 0.00 | 0.00 | 0.57 | 0.13 | 7 | Endothelial |
| Podxl         |       | 1.11 | 0.00 | 0.00 | 0.49 | 0.10 | 7 | Endothelial |
| Mgll          |       | 1.10 | 0.00 | 0.00 | 0.52 | 0.15 | 7 | Endothelial |
| Gimap4        |       | 1.10 | 0.00 | 0.00 | 0.60 | 0.16 | 7 | Endothelial |
| Scn3b         |       | 1.09 | 0.00 | 0.00 | 0.39 | 0.07 | 7 | Endothelial |
| 9430020K01Rik |       | 1.08 | 0.00 | 0.00 | 0.51 | 0.12 | 7 | Endothelial |
| App           |       | 1.08 | 0.00 | 0.00 | 0.93 | 0.58 | 7 | Endothelial |
| Col4a2        |       | 1.07 | 0.00 | 0.00 | 0.85 | 0.42 | 7 | Endothelial |
| Trib2         |       | 1.07 | 0.00 | 0.00 | 0.45 | 0.10 | 7 | Endothelial |
| Prickle1      |       | 1.07 | 0.00 | 0.00 | 0.38 | 0.06 | 7 | Endothelial |

|          |      |      |      |      |      |   |             |
|----------|------|------|------|------|------|---|-------------|
| Slc16a9  | 1.06 | 0.00 | 0.00 | 0.32 | 0.05 | 7 | Endothelial |
| Klf4     | 1.06 | 0.00 | 0.00 | 0.67 | 0.22 | 7 | Endothelial |
| Lmo2     | 1.06 | 0.00 | 0.00 | 0.38 | 0.06 | 7 | Endothelial |
| Cd36     | 1.05 | 0.00 | 0.00 | 0.78 | 0.32 | 7 | Endothelial |
| Jun      | 1.03 | 0.00 | 0.00 | 0.83 | 0.35 | 7 | Endothelial |
| Foxf1    | 1.03 | 0.00 | 0.00 | 0.46 | 0.11 | 7 | Endothelial |
| Impdh1   | 1.01 | 0.00 | 0.00 | 0.38 | 0.07 | 7 | Endothelial |
| Rapgef5  | 1.01 | 0.00 | 0.00 | 0.43 | 0.10 | 7 | Endothelial |
| Myzap    | 0.99 | 0.00 | 0.00 | 0.53 | 0.13 | 7 | Endothelial |
| Epas1    | 0.99 | 0.00 | 0.00 | 0.72 | 0.24 | 7 | Endothelial |
| Emcn     | 0.99 | 0.00 | 0.00 | 0.46 | 0.10 | 7 | Endothelial |
| Enho     | 0.99 | 0.00 | 0.00 | 0.26 | 0.02 | 7 | Endothelial |
| Ccdc68   | 0.98 | 0.00 | 0.00 | 0.29 | 0.05 | 7 | Endothelial |
| Arhgef3  | 0.98 | 0.00 | 0.00 | 0.36 | 0.06 | 7 | Endothelial |
| Tnfsf10  | 0.96 | 0.00 | 0.00 | 0.38 | 0.08 | 7 | Endothelial |
| Stard8   | 0.95 | 0.00 | 0.00 | 0.35 | 0.06 | 7 | Endothelial |
| Dcbld1   | 0.95 | 0.00 | 0.00 | 0.26 | 0.04 | 7 | Endothelial |
| Edil3    | 0.95 | 0.00 | 0.00 | 0.26 | 0.02 | 7 | Endothelial |
| Arap2    | 0.95 | 0.00 | 0.00 | 0.36 | 0.07 | 7 | Endothelial |
| Mapt     | 0.92 | 0.00 | 0.00 | 0.28 | 0.04 | 7 | Endothelial |
| Clic5    | 0.92 | 0.00 | 0.00 | 0.70 | 0.22 | 7 | Endothelial |
| Gata2    | 0.92 | 0.00 | 0.00 | 0.51 | 0.13 | 7 | Endothelial |
| Adrb1    | 0.85 | 0.00 | 0.00 | 0.29 | 0.05 | 7 | Endothelial |
| Ybx1     | 0.93 | 0.00 | 0.00 | 0.91 | 0.63 | 7 | Endothelial |
| Arhgef12 | 1.09 | 0.00 | 0.00 | 0.63 | 0.22 | 7 | Endothelial |
| Bmpr2    | 1.00 | 0.00 | 0.00 | 0.39 | 0.09 | 7 | Endothelial |
| Gimap6   | 0.99 | 0.00 | 0.00 | 0.53 | 0.15 | 7 | Endothelial |
| Pvrl3    | 1.03 | 0.00 | 0.00 | 0.40 | 0.09 | 7 | Endothelial |
| Ppp1r16b | 0.94 | 0.00 | 0.00 | 0.39 | 0.08 | 7 | Endothelial |
| Agfg1    | 0.93 | 0.00 | 0.00 | 0.30 | 0.05 | 7 | Endothelial |
| Cav2     | 0.99 | 0.00 | 0.00 | 0.56 | 0.18 | 7 | Endothelial |
| BC028528 | 0.89 | 0.00 | 0.00 | 0.72 | 0.28 | 7 | Endothelial |
| Col4a1   | 0.93 | 0.00 | 0.00 | 0.86 | 0.48 | 7 | Endothelial |
| Ddah1    | 0.89 | 0.00 | 0.00 | 0.30 | 0.05 | 7 | Endothelial |
| Nipal3   | 0.88 | 0.00 | 0.00 | 0.29 | 0.05 | 7 | Endothelial |
| Slco2a1  | 0.96 | 0.00 | 0.00 | 0.42 | 0.10 | 7 | Endothelial |
| Arhgap29 | 1.02 | 0.00 | 0.00 | 0.60 | 0.20 | 7 | Endothelial |
| Cd24a    | 0.97 | 0.00 | 0.00 | 0.46 | 0.12 | 7 | Endothelial |
| Mfng     | 0.84 | 0.00 | 0.00 | 0.26 | 0.04 | 7 | Endothelial |
| Cyyr1    | 0.85 | 0.00 | 0.00 | 0.49 | 0.14 | 7 | Endothelial |
| Marcks   | 0.89 | 0.00 | 0.00 | 0.88 | 0.49 | 7 | Endothelial |
| Sptbn1   | 0.92 | 0.00 | 0.00 | 0.87 | 0.53 | 7 | Endothelial |
| Nav1     | 0.99 | 0.00 | 0.00 | 0.41 | 0.10 | 7 | Endothelial |

|               |      |      |      |      |      |   |             |
|---------------|------|------|------|------|------|---|-------------|
| Id3           | 0.84 | 0.00 | 0.00 | 0.84 | 0.44 | 7 | Endothelial |
| Rasip1        | 0.85 | 0.00 | 0.00 | 0.42 | 0.11 | 7 | Endothelial |
| Pitpnc1       | 0.96 | 0.00 | 0.00 | 0.42 | 0.11 | 7 | Endothelial |
| S100a16       | 0.89 | 0.00 | 0.00 | 0.62 | 0.23 | 7 | Endothelial |
| Tubb2a        | 0.94 | 0.00 | 0.00 | 0.57 | 0.20 | 7 | Endothelial |
| Tmcc3         | 0.91 | 0.00 | 0.00 | 0.34 | 0.08 | 7 | Endothelial |
| Hspa12b       | 0.75 | 0.00 | 0.00 | 0.28 | 0.05 | 7 | Endothelial |
| Sepp1         | 0.91 | 0.00 | 0.00 | 0.78 | 0.40 | 7 | Endothelial |
| 4931406P16Rik | 0.93 | 0.00 | 0.00 | 0.52 | 0.17 | 7 | Endothelial |
| Plekha1       | 0.93 | 0.00 | 0.00 | 0.40 | 0.11 | 7 | Endothelial |
| Ace           | 0.83 | 0.00 | 0.00 | 0.45 | 0.13 | 7 | Endothelial |
| Tspan12       | 0.82 | 0.00 | 0.00 | 0.27 | 0.05 | 7 | Endothelial |
| MLlt4         | 0.98 | 0.00 | 0.00 | 0.54 | 0.20 | 7 | Endothelial |
| Jup           | 0.94 | 0.00 | 0.00 | 0.47 | 0.15 | 7 | Endothelial |
| Id1           | 0.97 | 0.00 | 0.00 | 0.59 | 0.23 | 7 | Endothelial |
| Ecm1          | 0.89 | 0.00 | 0.00 | 0.27 | 0.05 | 7 | Endothelial |
| Add3          | 0.91 | 0.00 | 0.00 | 0.64 | 0.27 | 7 | Endothelial |
| Ushbp1        | 0.80 | 0.00 | 0.00 | 0.34 | 0.08 | 7 | Endothelial |
| Rasal2        | 0.76 | 0.00 | 0.00 | 0.26 | 0.05 | 7 | Endothelial |
| Nkd1          | 0.91 | 0.00 | 0.00 | 0.38 | 0.10 | 7 | Endothelial |
| Anxa3         | 0.88 | 0.00 | 0.00 | 0.57 | 0.21 | 7 | Endothelial |
| Fermt2        | 0.84 | 0.00 | 0.00 | 0.75 | 0.38 | 7 | Endothelial |
| Nes           | 0.84 | 0.00 | 0.00 | 0.57 | 0.20 | 7 | Endothelial |
| Tbx2          | 0.91 | 0.00 | 0.00 | 0.39 | 0.11 | 7 | Endothelial |
| Cnn3          | 0.84 | 0.00 | 0.00 | 0.66 | 0.29 | 7 | Endothelial |
| Bpgm          | 0.88 | 0.00 | 0.00 | 0.28 | 0.06 | 7 | Endothelial |
| Rhoj          | 0.85 | 0.00 | 0.00 | 0.51 | 0.17 | 7 | Endothelial |
| Acbd5         | 0.92 | 0.00 | 0.00 | 0.43 | 0.13 | 7 | Endothelial |
| Sema3c        | 0.86 | 0.00 | 0.00 | 0.53 | 0.19 | 7 | Endothelial |
| Btbd3         | 0.91 | 0.00 | 0.00 | 0.44 | 0.14 | 7 | Endothelial |
| Cd151         | 0.88 | 0.00 | 0.00 | 0.46 | 0.15 | 7 | Endothelial |
| Crip2         | 0.79 | 0.00 | 0.00 | 0.77 | 0.40 | 7 | Endothelial |
| Snrk          | 0.87 | 0.00 | 0.00 | 0.46 | 0.15 | 7 | Endothelial |
| Lyn           | 0.82 | 0.00 | 0.00 | 0.41 | 0.12 | 7 | Endothelial |
| Pea15a        | 0.86 | 0.00 | 0.00 | 0.42 | 0.13 | 7 | Endothelial |
| Arhgef15      | 0.72 | 0.00 | 0.00 | 0.29 | 0.07 | 7 | Endothelial |
| Ccdc85b       | 0.80 | 0.00 | 0.00 | 0.38 | 0.11 | 7 | Endothelial |
| Slfn5         | 0.74 | 0.00 | 0.00 | 0.34 | 0.09 | 7 | Endothelial |
| Cd38          | 0.72 | 0.00 | 0.00 | 0.25 | 0.05 | 7 | Endothelial |
| Abcg1         | 0.72 | 0.00 | 0.00 | 0.26 | 0.06 | 7 | Endothelial |
| Mxra7         | 0.82 | 0.00 | 0.00 | 0.42 | 0.13 | 7 | Endothelial |
| Ptprg         | 0.83 | 0.00 | 0.00 | 0.39 | 0.12 | 7 | Endothelial |
| Kank3         | 0.80 | 0.00 | 0.00 | 0.42 | 0.13 | 7 | Endothelial |

|               |      |      |      |      |      |   |             |
|---------------|------|------|------|------|------|---|-------------|
| Arap3         | 0.74 | 0.00 | 0.00 | 0.29 | 0.07 | 7 | Endothelial |
| Cd200         | 0.64 | 0.00 | 0.00 | 0.62 | 0.26 | 7 | Endothelial |
| Rcsd1         | 0.77 | 0.00 | 0.00 | 0.30 | 0.08 | 7 | Endothelial |
| Tie1          | 0.69 | 0.00 | 0.00 | 0.37 | 0.11 | 7 | Endothelial |
| Ly6c2         | 0.74 | 0.00 | 0.00 | 0.43 | 0.14 | 7 | Endothelial |
| Cxx1b         | 0.76 | 0.00 | 0.00 | 0.53 | 0.21 | 7 | Endothelial |
| Arrdc3        | 0.83 | 0.00 | 0.00 | 0.36 | 0.11 | 7 | Endothelial |
| Aqp1          | 0.67 | 0.00 | 0.00 | 0.51 | 0.19 | 7 | Endothelial |
| Ets1          | 0.76 | 0.00 | 0.00 | 0.57 | 0.24 | 7 | Endothelial |
| Adcy4         | 0.73 | 0.00 | 0.00 | 0.30 | 0.08 | 7 | Endothelial |
| Gng11         | 0.74 | 0.00 | 0.00 | 0.62 | 0.28 | 7 | Endothelial |
| Pde4b         | 0.80 | 0.00 | 0.00 | 0.41 | 0.13 | 7 | Endothelial |
| Ppap2b        | 0.77 | 0.00 | 0.00 | 0.55 | 0.23 | 7 | Endothelial |
| Syn3          | 0.94 | 0.00 | 0.00 | 0.42 | 0.15 | 7 | Endothelial |
| Tjp1          | 0.81 | 0.00 | 0.00 | 0.43 | 0.15 | 7 | Endothelial |
| Cxx1a         | 0.73 | 0.00 | 0.00 | 0.53 | 0.21 | 7 | Endothelial |
| Vim           | 0.58 | 0.00 | 0.00 | 0.92 | 0.65 | 7 | Endothelial |
| Casz1         | 0.74 | 0.00 | 0.00 | 0.40 | 0.13 | 7 | Endothelial |
| Smarca2       | 0.78 | 0.00 | 0.00 | 0.65 | 0.33 | 7 | Endothelial |
| Sgk1          | 0.73 | 0.00 | 0.00 | 0.48 | 0.18 | 7 | Endothelial |
| Srgn          | 0.60 | 0.00 | 0.00 | 0.68 | 0.32 | 7 | Endothelial |
| Ece1          | 0.71 | 0.00 | 0.00 | 0.57 | 0.24 | 7 | Endothelial |
| Clic4         | 0.84 | 0.00 | 0.00 | 0.59 | 0.28 | 7 | Endothelial |
| Rel1          | 0.83 | 0.00 | 0.00 | 0.49 | 0.19 | 7 | Endothelial |
| 2810025M15Rik | 0.73 | 0.00 | 0.00 | 0.37 | 0.12 | 7 | Endothelial |
| Sox17         | 0.63 | 0.00 | 0.00 | 0.40 | 0.13 | 7 | Endothelial |
| Tpst2         | 0.78 | 0.00 | 0.00 | 0.35 | 0.11 | 7 | Endothelial |
| Klf2          | 0.78 | 0.00 | 0.00 | 0.49 | 0.19 | 7 | Endothelial |
| Rasgrp3       | 0.65 | 0.00 | 0.00 | 0.38 | 0.12 | 7 | Endothelial |
| Ceacam1       | 0.71 | 0.00 | 0.00 | 0.31 | 0.09 | 7 | Endothelial |
| Bicd2         | 0.73 | 0.00 | 0.00 | 0.28 | 0.08 | 7 | Endothelial |
| Calm1         | 0.43 | 0.00 | 0.00 | 0.97 | 0.86 | 7 | Endothelial |
| Mef2a         | 0.74 | 0.00 | 0.00 | 0.65 | 0.35 | 7 | Endothelial |
| Ptprm         | 0.65 | 0.00 | 0.00 | 0.31 | 0.09 | 7 | Endothelial |
| Itm2b         | 0.53 | 0.00 | 0.00 | 0.90 | 0.75 | 7 | Endothelial |
| Serpinh1      | 0.67 | 0.00 | 0.00 | 0.70 | 0.38 | 7 | Endothelial |
| Cd97          | 0.73 | 0.00 | 0.00 | 0.45 | 0.17 | 7 | Endothelial |
| Hes1          | 0.78 | 0.00 | 0.00 | 0.58 | 0.28 | 7 | Endothelial |
| B2m           | 0.50 | 0.00 | 0.00 | 0.90 | 0.67 | 7 | Endothelial |
| Tmem140       | 0.68 | 0.00 | 0.00 | 0.26 | 0.07 | 7 | Endothelial |
| Snx3          | 0.73 | 0.00 | 0.00 | 0.61 | 0.32 | 7 | Endothelial |
| Zeb1          | 0.72 | 0.00 | 0.00 | 0.33 | 0.11 | 7 | Endothelial |
| Lyve1         | 0.41 | 0.00 | 0.00 | 0.53 | 0.21 | 7 | Endothelial |

|          |      |      |      |      |      |   |             |
|----------|------|------|------|------|------|---|-------------|
| Tubb2b   | 0.68 | 0.00 | 0.00 | 0.36 | 0.12 | 7 | Endothelial |
| Nid1     | 0.74 | 0.00 | 0.00 | 0.51 | 0.22 | 7 | Endothelial |
| Prkce    | 0.70 | 0.00 | 0.00 | 0.26 | 0.07 | 7 | Endothelial |
| Ddah2    | 0.69 | 0.00 | 0.00 | 0.54 | 0.25 | 7 | Endothelial |
| Skil     | 0.75 | 0.00 | 0.00 | 0.37 | 0.14 | 7 | Endothelial |
| Galnt18  | 0.70 | 0.00 | 0.00 | 0.32 | 0.10 | 7 | Endothelial |
| Qk       | 0.73 | 0.00 | 0.00 | 0.57 | 0.29 | 7 | Endothelial |
| Acap2    | 0.79 | 0.00 | 0.00 | 0.45 | 0.19 | 7 | Endothelial |
| St3gal6  | 0.67 | 0.00 | 0.00 | 0.28 | 0.09 | 7 | Endothelial |
| Tuba1a   | 0.61 | 0.00 | 0.00 | 0.78 | 0.50 | 7 | Endothelial |
| Hilpda   | 0.67 | 0.00 | 0.00 | 0.27 | 0.08 | 7 | Endothelial |
| Abi1     | 0.74 | 0.00 | 0.00 | 0.48 | 0.21 | 7 | Endothelial |
| Dlc1     | 0.72 | 0.00 | 0.00 | 0.42 | 0.17 | 7 | Endothelial |
| Clec14a  | 0.53 | 0.00 | 0.00 | 0.44 | 0.17 | 7 | Endothelial |
| Dpp4     | 0.71 | 0.00 | 0.00 | 0.34 | 0.12 | 7 | Endothelial |
| Cxx1c    | 0.66 | 0.00 | 0.00 | 0.48 | 0.21 | 7 | Endothelial |
| Gimap1   | 0.68 | 0.00 | 0.00 | 0.36 | 0.13 | 7 | Endothelial |
| Rhoc     | 0.72 | 0.00 | 0.00 | 0.45 | 0.20 | 7 | Endothelial |
| Cltb     | 0.70 | 0.00 | 0.00 | 0.31 | 0.11 | 7 | Endothelial |
| Fas      | 0.71 | 0.00 | 0.00 | 0.29 | 0.09 | 7 | Endothelial |
| Itgb1    | 0.52 | 0.00 | 0.00 | 0.85 | 0.62 | 7 | Endothelial |
| Arhgap31 | 0.69 | 0.00 | 0.00 | 0.32 | 0.11 | 7 | Endothelial |
| Klhl5    | 0.66 | 0.00 | 0.00 | 0.36 | 0.14 | 7 | Endothelial |
| Rap1a    | 0.70 | 0.00 | 0.00 | 0.56 | 0.29 | 7 | Endothelial |
| Mgst3    | 0.69 | 0.00 | 0.00 | 0.28 | 0.09 | 7 | Endothelial |
| Erg      | 0.60 | 0.00 | 0.00 | 0.35 | 0.13 | 7 | Endothelial |
| Rasgef1a | 0.58 | 0.00 | 0.00 | 0.26 | 0.08 | 7 | Endothelial |
| Map7d1   | 0.70 | 0.00 | 0.00 | 0.41 | 0.17 | 7 | Endothelial |
| Hip1     | 0.63 | 0.00 | 0.00 | 0.38 | 0.15 | 7 | Endothelial |
| Myo10    | 0.64 | 0.00 | 0.00 | 0.33 | 0.12 | 7 | Endothelial |
| Gngt2    | 0.55 | 0.00 | 0.00 | 0.29 | 0.10 | 7 | Endothelial |
| Ldb2     | 0.54 | 0.00 | 0.00 | 0.39 | 0.16 | 7 | Endothelial |
| Cmtm3    | 0.62 | 0.00 | 0.00 | 0.33 | 0.13 | 7 | Endothelial |
| Rdx      | 0.60 | 0.00 | 0.00 | 0.68 | 0.45 | 7 | Endothelial |
| Elmo1    | 0.70 | 0.00 | 0.00 | 0.30 | 0.11 | 7 | Endothelial |
| Bin1     | 0.65 | 0.00 | 0.00 | 0.29 | 0.10 | 7 | Endothelial |
| Myl12a   | 0.50 | 0.00 | 0.00 | 0.81 | 0.65 | 7 | Endothelial |
| Grap     | 0.57 | 0.00 | 0.00 | 0.34 | 0.13 | 7 | Endothelial |
| Nfic     | 0.66 | 0.00 | 0.00 | 0.47 | 0.24 | 7 | Endothelial |
| Myl12b   | 0.53 | 0.00 | 0.00 | 0.76 | 0.60 | 7 | Endothelial |
| Gpihbp1  | 0.49 | 0.00 | 0.00 | 0.39 | 0.16 | 7 | Endothelial |
| Rab11a   | 0.63 | 0.00 | 0.00 | 0.49 | 0.25 | 7 | Endothelial |
| Bst2     | 0.62 | 0.00 | 0.00 | 0.34 | 0.13 | 7 | Endothelial |

|         |      |      |      |      |      |   |             |
|---------|------|------|------|------|------|---|-------------|
| Oraov1  | 0.60 | 0.00 | 0.00 | 0.25 | 0.09 | 7 | Endothelial |
| Efnb2   | 0.52 | 0.00 | 0.00 | 0.35 | 0.14 | 7 | Endothelial |
| Pam     | 0.59 | 0.00 | 0.00 | 0.38 | 0.17 | 7 | Endothelial |
| Eng     | 0.60 | 0.00 | 0.00 | 0.29 | 0.11 | 7 | Endothelial |
| Gnai2   | 0.58 | 0.00 | 0.00 | 0.62 | 0.38 | 7 | Endothelial |
| Pxdn    | 0.58 | 0.00 | 0.00 | 0.28 | 0.10 | 7 | Endothelial |
| Vcl     | 0.72 | 0.00 | 0.00 | 0.31 | 0.12 | 7 | Endothelial |
| Tmem88  | 0.52 | 0.00 | 0.00 | 0.28 | 0.10 | 7 | Endothelial |
| Cav1    | 0.41 | 0.00 | 0.00 | 0.59 | 0.31 | 7 | Endothelial |
| Cd47    | 0.61 | 0.00 | 0.00 | 0.66 | 0.42 | 7 | Endothelial |
| Notch1  | 0.55 | 0.00 | 0.00 | 0.32 | 0.13 | 7 | Endothelial |
| Reep3   | 0.63 | 0.00 | 0.00 | 0.39 | 0.18 | 7 | Endothelial |
| Gcc2    | 0.64 | 0.00 | 0.00 | 0.47 | 0.24 | 7 | Endothelial |
| Dynll1  | 0.52 | 0.00 | 0.00 | 0.67 | 0.44 | 7 | Endothelial |
| Cbfa2t3 | 0.49 | 0.00 | 0.00 | 0.34 | 0.14 | 7 | Endothelial |
| Zfhx3   | 0.68 | 0.00 | 0.00 | 0.36 | 0.17 | 7 | Endothelial |
| Eva1b   | 0.67 | 0.00 | 0.00 | 0.40 | 0.19 | 7 | Endothelial |
| Myo18a  | 0.58 | 0.00 | 0.00 | 0.27 | 0.10 | 7 | Endothelial |
| Mcam    | 0.48 | 0.00 | 0.00 | 0.31 | 0.13 | 7 | Endothelial |
| Carhsp1 | 0.57 | 0.00 | 0.00 | 0.31 | 0.13 | 7 | Endothelial |
| Mocs2   | 0.64 | 0.00 | 0.00 | 0.39 | 0.19 | 7 | Endothelial |
| Sptan1  | 0.58 | 0.00 | 0.00 | 0.36 | 0.16 | 7 | Endothelial |
| Smad7   | 0.55 | 0.00 | 0.00 | 0.28 | 0.11 | 7 | Endothelial |
| Tcf4    | 0.50 | 0.00 | 0.00 | 0.64 | 0.40 | 7 | Endothelial |
| Phactr2 | 0.56 | 0.00 | 0.00 | 0.30 | 0.13 | 7 | Endothelial |
| Ctnna1  | 0.54 | 0.00 | 0.00 | 0.58 | 0.36 | 7 | Endothelial |
| Atp8a1  | 0.59 | 0.00 | 0.00 | 0.34 | 0.15 | 7 | Endothelial |
| Plcg1   | 0.59 | 0.00 | 0.00 | 0.35 | 0.16 | 7 | Endothelial |
| Ets2    | 0.57 | 0.00 | 0.00 | 0.29 | 0.12 | 7 | Endothelial |
| Dnajc8  | 0.53 | 0.00 | 0.00 | 0.63 | 0.42 | 7 | Endothelial |
| F11r    | 0.52 | 0.00 | 0.00 | 0.35 | 0.16 | 7 | Endothelial |
| Cyb5r3  | 0.60 | 0.00 | 0.00 | 0.59 | 0.38 | 7 | Endothelial |
| H2-D1   | 0.38 | 0.00 | 0.00 | 0.73 | 0.49 | 7 | Endothelial |
| Arpc2   | 0.41 | 0.00 | 0.00 | 0.78 | 0.61 | 7 | Endothelial |
| Ctnnd1  | 0.60 | 0.00 | 0.00 | 0.34 | 0.16 | 7 | Endothelial |
| Yaf2    | 0.56 | 0.00 | 0.00 | 0.25 | 0.10 | 7 | Endothelial |
| Tppp3   | 0.40 | 0.00 | 0.00 | 0.29 | 0.12 | 7 | Endothelial |
| Guk1    | 0.56 | 0.00 | 0.00 | 0.33 | 0.15 | 7 | Endothelial |
| Rbms1   | 0.58 | 0.00 | 0.00 | 0.59 | 0.38 | 7 | Endothelial |
| Wasf2   | 0.55 | 0.00 | 0.00 | 0.51 | 0.30 | 7 | Endothelial |
| Aplp2   | 0.52 | 0.00 | 0.00 | 0.60 | 0.38 | 7 | Endothelial |
| Fibin   | 0.73 | 0.00 | 0.00 | 0.28 | 0.12 | 7 | Endothelial |
| Srpr    | 0.59 | 0.00 | 0.00 | 0.44 | 0.24 | 7 | Endothelial |

|          |      |      |      |      |      |   |             |
|----------|------|------|------|------|------|---|-------------|
| Elk3     | 0.51 | 0.00 | 0.00 | 0.31 | 0.13 | 7 | Endothelial |
| Mtus1    | 0.60 | 0.00 | 0.00 | 0.35 | 0.17 | 7 | Endothelial |
| Tspan8   | 0.50 | 0.00 | 0.00 | 0.28 | 0.12 | 7 | Endothelial |
| Gstm1    | 0.50 | 0.00 | 0.00 | 0.32 | 0.15 | 7 | Endothelial |
| Rap1b    | 0.56 | 0.00 | 0.00 | 0.42 | 0.23 | 7 | Endothelial |
| Cd93     | 0.42 | 0.00 | 0.00 | 0.43 | 0.21 | 7 | Endothelial |
| Tmem176a | 0.57 | 0.00 | 0.00 | 0.39 | 0.20 | 7 | Endothelial |
| Luzp1    | 0.52 | 0.00 | 0.00 | 0.38 | 0.19 | 7 | Endothelial |
| Laptm4a  | 0.48 | 0.00 | 0.00 | 0.70 | 0.51 | 7 | Endothelial |
| Vps36    | 0.59 | 0.00 | 0.00 | 0.48 | 0.28 | 7 | Endothelial |
| Plec     | 0.53 | 0.00 | 0.00 | 0.28 | 0.12 | 7 | Endothelial |
| Ccnd3    | 0.56 | 0.00 | 0.00 | 0.36 | 0.18 | 7 | Endothelial |
| Plscr3   | 0.49 | 0.00 | 0.00 | 0.28 | 0.12 | 7 | Endothelial |
| Arl2bp   | 0.53 | 0.00 | 0.00 | 0.29 | 0.13 | 7 | Endothelial |
| Nras     | 0.54 | 0.00 | 0.00 | 0.33 | 0.16 | 7 | Endothelial |
| Daam1    | 0.52 | 0.00 | 0.00 | 0.32 | 0.15 | 7 | Endothelial |
| Itpril2  | 0.52 | 0.00 | 0.00 | 0.34 | 0.17 | 7 | Endothelial |
| Tmod3    | 0.54 | 0.00 | 0.00 | 0.45 | 0.26 | 7 | Endothelial |
| Bnip2    | 0.53 | 0.00 | 0.00 | 0.49 | 0.29 | 7 | Endothelial |
| Plk2     | 0.51 | 0.00 | 0.00 | 0.33 | 0.16 | 7 | Endothelial |
| Serinc1  | 0.58 | 0.00 | 0.00 | 0.47 | 0.29 | 7 | Endothelial |
| Nck1     | 0.50 | 0.00 | 0.00 | 0.28 | 0.13 | 7 | Endothelial |
| Fnbp1l   | 0.48 | 0.00 | 0.00 | 0.44 | 0.25 | 7 | Endothelial |
| Cdc42    | 0.46 | 0.00 | 0.00 | 0.69 | 0.54 | 7 | Endothelial |
| Pon2     | 0.51 | 0.00 | 0.00 | 0.30 | 0.14 | 7 | Endothelial |
| Msn      | 0.45 | 0.00 | 0.00 | 0.62 | 0.43 | 7 | Endothelial |
| Hook3    | 0.54 | 0.00 | 0.00 | 0.40 | 0.22 | 7 | Endothelial |
| Tmem66   | 0.54 | 0.00 | 0.00 | 0.36 | 0.20 | 7 | Endothelial |
| Tjp2     | 0.49 | 0.00 | 0.00 | 0.32 | 0.16 | 7 | Endothelial |
| Rassf1   | 0.49 | 0.00 | 0.00 | 0.29 | 0.14 | 7 | Endothelial |
| Gng2     | 0.43 | 0.00 | 0.00 | 0.26 | 0.12 | 7 | Endothelial |
| Msi2     | 0.52 | 0.00 | 0.00 | 0.33 | 0.17 | 7 | Endothelial |
| Gnaq     | 0.53 | 0.00 | 0.00 | 0.38 | 0.21 | 7 | Endothelial |
| Sash1    | 0.46 | 0.00 | 0.00 | 0.27 | 0.13 | 7 | Endothelial |
| Sypl     | 0.49 | 0.00 | 0.00 | 0.43 | 0.25 | 7 | Endothelial |
| Ppp2r5a  | 0.50 | 0.00 | 0.00 | 0.29 | 0.14 | 7 | Endothelial |
| Mfap2    | 0.35 | 0.00 | 0.00 | 0.56 | 0.34 | 7 | Endothelial |
| Nin      | 0.49 | 0.00 | 0.00 | 0.29 | 0.14 | 7 | Endothelial |
| Csnk1a1  | 0.41 | 0.00 | 0.00 | 0.69 | 0.53 | 7 | Endothelial |
| Wwc2     | 0.48 | 0.00 | 0.00 | 0.27 | 0.13 | 7 | Endothelial |
| Fcho2    | 0.53 | 0.00 | 0.00 | 0.35 | 0.19 | 7 | Endothelial |
| Tmco1    | 0.48 | 0.00 | 0.00 | 0.46 | 0.29 | 7 | Endothelial |
| Lmo7     | 0.27 | 0.00 | 0.00 | 0.27 | 0.12 | 7 | Endothelial |

|               |      |      |      |      |      |   |             |
|---------------|------|------|------|------|------|---|-------------|
| Klc1          | 0.47 | 0.00 | 0.00 | 0.29 | 0.14 | 7 | Endothelial |
| Anp32a        | 0.33 | 0.00 | 0.00 | 0.73 | 0.60 | 7 | Endothelial |
| Rac1          | 0.48 | 0.00 | 0.00 | 0.46 | 0.30 | 7 | Endothelial |
| Ap1s2         | 0.38 | 0.00 | 0.00 | 0.25 | 0.12 | 7 | Endothelial |
| Zmiz1         | 0.42 | 0.00 | 0.00 | 0.38 | 0.21 | 7 | Endothelial |
| Slc43a3       | 0.38 | 0.00 | 0.00 | 0.38 | 0.21 | 7 | Endothelial |
| Heg1          | 0.37 | 0.00 | 0.00 | 0.31 | 0.16 | 7 | Endothelial |
| Cyfip1        | 0.45 | 0.00 | 0.00 | 0.30 | 0.16 | 7 | Endothelial |
| Ywhaz         | 0.40 | 0.00 | 0.00 | 0.65 | 0.51 | 7 | Endothelial |
| Arf1          | 0.42 | 0.00 | 0.00 | 0.58 | 0.42 | 7 | Endothelial |
| Ywhab         | 0.33 | 0.00 | 0.00 | 0.70 | 0.56 | 7 | Endothelial |
| Rhoa          | 0.41 | 0.00 | 0.00 | 0.61 | 0.46 | 7 | Endothelial |
| Palmd         | 0.34 | 0.00 | 0.00 | 0.26 | 0.13 | 7 | Endothelial |
| Ier2          | 0.41 | 0.00 | 0.00 | 0.41 | 0.25 | 7 | Endothelial |
| B230219D22Rik | 0.44 | 0.00 | 0.00 | 0.43 | 0.27 | 7 | Endothelial |
| Tmem176b      | 0.43 | 0.00 | 0.00 | 0.50 | 0.34 | 7 | Endothelial |
| Ubb           | 0.26 | 0.00 | 0.00 | 0.87 | 0.81 | 7 | Endothelial |
| Zcrb1         | 0.45 | 0.00 | 0.00 | 0.44 | 0.29 | 7 | Endothelial |
| Kif1b         | 0.48 | 0.00 | 0.00 | 0.38 | 0.23 | 7 | Endothelial |
| Hdac7         | 0.42 | 0.00 | 0.00 | 0.26 | 0.14 | 7 | Endothelial |
| Eif4g2        | 0.43 | 0.00 | 0.00 | 0.55 | 0.41 | 7 | Endothelial |
| Mapk3         | 0.43 | 0.00 | 0.00 | 0.26 | 0.13 | 7 | Endothelial |
| Efnb1         | 0.41 | 0.00 | 0.00 | 0.28 | 0.15 | 7 | Endothelial |
| Lamp1         | 0.42 | 0.00 | 0.00 | 0.57 | 0.42 | 7 | Endothelial |
| Sdcbp         | 0.42 | 0.00 | 0.00 | 0.43 | 0.27 | 7 | Endothelial |
| Itsn2         | 0.43 | 0.00 | 0.00 | 0.39 | 0.24 | 7 | Endothelial |
| Fxyd5         | 0.34 | 0.00 | 0.00 | 0.32 | 0.18 | 7 | Endothelial |
| Ctsl          | 0.34 | 0.00 | 0.00 | 0.56 | 0.39 | 7 | Endothelial |
| Mxd4          | 0.38 | 0.00 | 0.00 | 0.53 | 0.37 | 7 | Endothelial |
| Mbnl2         | 0.39 | 0.00 | 0.00 | 0.50 | 0.34 | 7 | Endothelial |
| Rpn1          | 0.44 | 0.00 | 0.00 | 0.34 | 0.21 | 7 | Endothelial |
| Lgals9        | 0.34 | 0.00 | 0.00 | 0.27 | 0.14 | 7 | Endothelial |
| Eid1          | 0.41 | 0.00 | 0.00 | 0.44 | 0.29 | 7 | Endothelial |
| Gna13         | 0.47 | 0.00 | 0.00 | 0.26 | 0.14 | 7 | Endothelial |
| Leptotl1      | 0.41 | 0.00 | 0.00 | 0.27 | 0.15 | 7 | Endothelial |
| Nap1l4        | 0.41 | 0.00 | 0.00 | 0.40 | 0.26 | 7 | Endothelial |
| Zfp706        | 0.44 | 0.00 | 0.00 | 0.46 | 0.32 | 7 | Endothelial |
| Rock2         | 0.42 | 0.00 | 0.00 | 0.47 | 0.32 | 7 | Endothelial |
| Hpcal1        | 0.40 | 0.00 | 0.00 | 0.27 | 0.15 | 7 | Endothelial |
| Tubb5         | 0.28 | 0.00 | 0.00 | 0.61 | 0.44 | 7 | Endothelial |
| Epb4.1l2      | 0.40 | 0.00 | 0.00 | 0.32 | 0.19 | 7 | Endothelial |
| Zbtb20        | 0.40 | 0.00 | 0.00 | 0.41 | 0.26 | 7 | Endothelial |
| Dram2         | 0.40 | 0.00 | 0.00 | 0.29 | 0.16 | 7 | Endothelial |

|               |      |      |      |      |      |   |             |
|---------------|------|------|------|------|------|---|-------------|
| Myh9          | 0.41 | 0.00 | 0.00 | 0.47 | 0.33 | 7 | Endothelial |
| Dpysl2        | 0.42 | 0.00 | 0.00 | 0.30 | 0.17 | 7 | Endothelial |
| Tpm4          | 0.31 | 0.00 | 0.00 | 0.62 | 0.49 | 7 | Endothelial |
| Ccser2        | 0.36 | 0.00 | 0.00 | 0.26 | 0.14 | 7 | Endothelial |
| Leprot        | 0.38 | 0.00 | 0.00 | 0.47 | 0.32 | 7 | Endothelial |
| Fubp1         | 0.38 | 0.00 | 0.00 | 0.38 | 0.24 | 7 | Endothelial |
| Rab10         | 0.42 | 0.00 | 0.00 | 0.38 | 0.24 | 7 | Endothelial |
| Oaz2          | 0.40 | 0.00 | 0.00 | 0.42 | 0.28 | 7 | Endothelial |
| Elf2          | 0.43 | 0.00 | 0.00 | 0.30 | 0.18 | 7 | Endothelial |
| Myadm         | 0.44 | 0.00 | 0.00 | 0.32 | 0.20 | 7 | Endothelial |
| Pak1ip1       | 0.38 | 0.00 | 0.00 | 0.26 | 0.14 | 7 | Endothelial |
| Dusp6         | 0.35 | 0.00 | 0.00 | 0.31 | 0.18 | 7 | Endothelial |
| Pcdhga9       | 0.36 | 0.00 | 0.00 | 0.30 | 0.17 | 7 | Endothelial |
| Shisa5        | 0.30 | 0.00 | 0.00 | 0.34 | 0.20 | 7 | Endothelial |
| Tmem59        | 0.38 | 0.00 | 0.00 | 0.53 | 0.40 | 7 | Endothelial |
| Twf1          | 0.39 | 0.00 | 0.00 | 0.27 | 0.16 | 7 | Endothelial |
| Tnfaip1       | 0.39 | 0.00 | 0.00 | 0.28 | 0.16 | 7 | Endothelial |
| Mtdh          | 0.32 | 0.00 | 0.00 | 0.61 | 0.48 | 7 | Endothelial |
| Rab5a         | 0.40 | 0.00 | 0.00 | 0.25 | 0.15 | 7 | Endothelial |
| Xiap          | 0.39 | 0.00 | 0.00 | 0.32 | 0.20 | 7 | Endothelial |
| 1110008F13Rik | 0.43 | 0.00 | 0.00 | 0.27 | 0.16 | 7 | Endothelial |
| Clic1         | 0.35 | 0.00 | 0.00 | 0.51 | 0.38 | 7 | Endothelial |
| Tmem50a       | 0.32 | 0.00 | 0.00 | 0.57 | 0.45 | 7 | Endothelial |
| Tln1          | 0.33 | 0.00 | 0.00 | 0.52 | 0.39 | 7 | Endothelial |
| Selk          | 0.37 | 0.00 | 0.00 | 0.44 | 0.31 | 7 | Endothelial |
| Serinc3       | 0.30 | 0.00 | 0.00 | 0.45 | 0.32 | 7 | Endothelial |
| Ppp1ca        | 0.37 | 0.00 | 0.00 | 0.45 | 0.33 | 7 | Endothelial |
| Rap2a         | 0.31 | 0.00 | 0.00 | 0.27 | 0.15 | 7 | Endothelial |
| 1700020I14Rik | 0.35 | 0.00 | 0.00 | 0.34 | 0.22 | 7 | Endothelial |
| Cdkn1a        | 0.36 | 0.00 | 0.00 | 0.27 | 0.16 | 7 | Endothelial |
| Crk           | 0.38 | 0.00 | 0.00 | 0.27 | 0.16 | 7 | Endothelial |
| Lhfp          | 0.26 | 0.00 | 0.00 | 0.26 | 0.15 | 7 | Endothelial |
| Timp2         | 0.35 | 0.00 | 0.00 | 0.32 | 0.21 | 7 | Endothelial |
| Psmd12        | 0.34 | 0.00 | 0.00 | 0.34 | 0.23 | 7 | Endothelial |
| Gnb2          | 0.37 | 0.00 | 0.00 | 0.49 | 0.37 | 7 | Endothelial |
| Rtn4          | 0.34 | 0.00 | 0.00 | 0.35 | 0.23 | 7 | Endothelial |
| Rab6a         | 0.33 | 0.00 | 0.00 | 0.32 | 0.21 | 7 | Endothelial |
| Ablim1        | 0.27 | 0.00 | 0.00 | 0.37 | 0.25 | 7 | Endothelial |
| Pttglip       | 0.37 | 0.00 | 0.00 | 0.27 | 0.17 | 7 | Endothelial |
| Tsg101        | 0.35 | 0.00 | 0.00 | 0.26 | 0.16 | 7 | Endothelial |
| Tuba1c        | 0.27 | 0.00 | 0.00 | 0.45 | 0.32 | 7 | Endothelial |
| Pak2          | 0.34 | 0.00 | 0.00 | 0.41 | 0.29 | 7 | Endothelial |
| Rala          | 0.34 | 0.00 | 0.00 | 0.34 | 0.23 | 7 | Endothelial |

|               |      |      |      |      |      |   |             |
|---------------|------|------|------|------|------|---|-------------|
| Atxn7l3b      | 0.32 | 0.00 | 0.00 | 0.51 | 0.40 | 7 | Endothelial |
| Chmp5         | 0.35 | 0.00 | 0.00 | 0.34 | 0.24 | 7 | Endothelial |
| Tmed10        | 0.38 | 0.00 | 0.00 | 0.46 | 0.36 | 7 | Endothelial |
| Dhrs7         | 0.35 | 0.00 | 0.00 | 0.25 | 0.16 | 7 | Endothelial |
| Cggbp1        | 0.37 | 0.00 | 0.00 | 0.27 | 0.18 | 7 | Endothelial |
| Pomp          | 0.30 | 0.00 | 0.00 | 0.43 | 0.31 | 7 | Endothelial |
| Dnaja1        | 0.26 | 0.00 | 0.00 | 0.62 | 0.51 | 7 | Endothelial |
| Map1lc3a      | 0.37 | 0.00 | 0.00 | 0.30 | 0.20 | 7 | Endothelial |
| Hmg20b        | 0.32 | 0.00 | 0.00 | 0.45 | 0.34 | 7 | Endothelial |
| Prkar1a       | 0.31 | 0.00 | 0.00 | 0.43 | 0.32 | 7 | Endothelial |
| Pdcd10        | 0.33 | 0.00 | 0.00 | 0.31 | 0.21 | 7 | Endothelial |
| Hnrnpf        | 0.29 | 0.00 | 0.00 | 0.45 | 0.34 | 7 | Endothelial |
| Rab2a         | 0.33 | 0.00 | 0.00 | 0.37 | 0.27 | 7 | Endothelial |
| Amotl1        | 0.28 | 0.00 | 0.00 | 0.25 | 0.16 | 7 | Endothelial |
| Pls3          | 0.31 | 0.00 | 0.00 | 0.30 | 0.20 | 7 | Endothelial |
| Cnih1         | 0.33 | 0.00 | 0.00 | 0.28 | 0.18 | 7 | Endothelial |
| Cd2ap         | 0.27 | 0.00 | 0.00 | 0.45 | 0.34 | 7 | Endothelial |
| Dync1i2       | 0.27 | 0.00 | 0.00 | 0.57 | 0.48 | 7 | Endothelial |
| Shoc2         | 0.30 | 0.00 | 0.00 | 0.30 | 0.20 | 7 | Endothelial |
| Gsk3b         | 0.31 | 0.00 | 0.00 | 0.38 | 0.27 | 7 | Endothelial |
| Tmem30a       | 0.32 | 0.00 | 0.00 | 0.38 | 0.28 | 7 | Endothelial |
| Sbds          | 0.30 | 0.00 | 0.00 | 0.32 | 0.22 | 7 | Endothelial |
| Phf20l1       | 0.28 | 0.00 | 0.00 | 0.39 | 0.28 | 7 | Endothelial |
| Vps35         | 0.30 | 0.00 | 0.00 | 0.27 | 0.18 | 7 | Endothelial |
| Gnb1          | 0.31 | 0.00 | 0.00 | 0.31 | 0.22 | 7 | Endothelial |
| Tmbim6        | 0.28 | 0.00 | 0.00 | 0.47 | 0.38 | 7 | Endothelial |
| Rab1          | 0.29 | 0.00 | 0.00 | 0.40 | 0.31 | 7 | Endothelial |
| 2700089E24Rik | 0.29 | 0.00 | 0.00 | 0.32 | 0.23 | 7 | Endothelial |
| Wasl          | 0.27 | 0.00 | 0.00 | 0.27 | 0.18 | 7 | Endothelial |
| Ginm1         | 0.30 | 0.00 | 0.00 | 0.33 | 0.23 | 7 | Endothelial |
| Sec62         | 0.27 | 0.00 | 0.00 | 0.54 | 0.45 | 7 | Endothelial |
| Mapre1        | 0.28 | 0.00 | 0.00 | 0.39 | 0.29 | 7 | Endothelial |
| Irf2          | 0.31 | 0.00 | 0.00 | 0.33 | 0.24 | 7 | Endothelial |
| Ddx3x         | 0.26 | 0.00 | 0.00 | 0.39 | 0.30 | 7 | Endothelial |
| Sh3glb1       | 0.25 | 0.00 | 0.00 | 0.49 | 0.40 | 7 | Endothelial |
| Prpf4b        | 0.26 | 0.00 | 0.00 | 0.54 | 0.46 | 7 | Endothelial |
| Eif4g3        | 0.29 | 0.00 | 0.00 | 0.36 | 0.27 | 7 | Endothelial |
| Ccdc47        | 0.35 | 0.00 | 0.00 | 0.29 | 0.21 | 7 | Endothelial |
| Dcun1d5       | 0.31 | 0.00 | 0.00 | 0.25 | 0.17 | 7 | Endothelial |
| G3bp2         | 0.26 | 0.00 | 0.00 | 0.40 | 0.31 | 7 | Endothelial |
| Sri           | 0.28 | 0.00 | 0.00 | 0.37 | 0.27 | 7 | Endothelial |
| Snrpb         | 0.27 | 0.00 | 0.00 | 0.44 | 0.35 | 7 | Endothelial |
| Zfand5        | 0.29 | 0.00 | 0.00 | 0.34 | 0.26 | 7 | Endothelial |

|           |      |      |      |      |      |   |             |
|-----------|------|------|------|------|------|---|-------------|
| Csnk2a1   | 0.28 | 0.00 | 0.00 | 0.39 | 0.31 | 7 | Endothelial |
| Dusp11    | 0.28 | 0.00 | 0.00 | 0.34 | 0.25 | 7 | Endothelial |
| Rab7      | 0.30 | 0.00 | 0.00 | 0.33 | 0.25 | 7 | Endothelial |
| Gabarapl2 | 0.26 | 0.00 | 0.00 | 0.30 | 0.22 | 7 | Endothelial |
| Psmd7     | 0.27 | 0.00 | 0.00 | 0.37 | 0.28 | 7 | Endothelial |
| Pafah1b1  | 0.26 | 0.00 | 0.00 | 0.42 | 0.33 | 7 | Endothelial |
| Ube2a     | 0.29 | 0.00 | 0.00 | 0.26 | 0.18 | 7 | Endothelial |
| Rtn3      | 0.28 | 0.00 | 0.00 | 0.34 | 0.26 | 7 | Endothelial |
| Rsu1      | 0.25 | 0.00 | 0.00 | 0.28 | 0.20 | 7 | Endothelial |
| Psmd6     | 0.27 | 0.00 | 0.00 | 0.27 | 0.19 | 7 | Endothelial |
| Pdpf      | 0.27 | 0.00 | 0.00 | 0.26 | 0.18 | 7 | Endothelial |
| Lman1     | 0.28 | 0.00 | 0.00 | 0.26 | 0.18 | 7 | Endothelial |
| Emc7      | 0.26 | 0.00 | 0.00 | 0.29 | 0.21 | 7 | Endothelial |
| Atp6v1a   | 0.27 | 0.00 | 0.00 | 0.36 | 0.28 | 7 | Endothelial |
| Atf4      | 0.25 | 0.00 | 0.00 | 0.36 | 0.28 | 7 | Endothelial |
| Adam10    | 0.28 | 0.00 | 0.00 | 0.26 | 0.19 | 7 | Endothelial |
| Ociad1    | 0.26 | 0.00 | 0.00 | 0.39 | 0.31 | 7 | Endothelial |
| Taok1     | 0.25 | 0.00 | 0.00 | 0.26 | 0.19 | 7 | Endothelial |
| Pcbp1     | 0.26 | 0.00 | 0.00 | 0.29 | 0.22 | 7 | Endothelial |
| Lyve1     | 2.37 | 0.00 | 0.00 | 0.92 | 0.20 | 8 | Endothelial |
| Cd200     | 2.11 | 0.00 | 0.00 | 0.94 | 0.25 | 8 | Endothelial |
| Cdkn1a    | 1.95 | 0.00 | 0.00 | 0.80 | 0.14 | 8 | Endothelial |
| Ly6c1     | 1.92 | 0.00 | 0.00 | 0.83 | 0.17 | 8 | Endothelial |
| Ramp2     | 1.84 | 0.00 | 0.00 | 0.98 | 0.26 | 8 | Endothelial |
| Cxx1c     | 1.68 | 0.00 | 0.00 | 0.84 | 0.20 | 8 | Endothelial |
| Cxx1a     | 1.66 | 0.00 | 0.00 | 0.84 | 0.20 | 8 | Endothelial |
| Ly6a      | 1.66 | 0.00 | 0.00 | 0.81 | 0.17 | 8 | Endothelial |
| Lpl       | 1.65 | 0.00 | 0.00 | 0.68 | 0.13 | 8 | Endothelial |
| Ednrb     | 1.63 | 0.00 | 0.00 | 0.73 | 0.13 | 8 | Endothelial |
| Cxx1b     | 1.60 | 0.00 | 0.00 | 0.82 | 0.20 | 8 | Endothelial |
| Klf4      | 1.60 | 0.00 | 0.00 | 0.80 | 0.21 | 8 | Endothelial |
| Aqp1      | 1.53 | 0.00 | 0.00 | 0.79 | 0.17 | 8 | Endothelial |
| Gata2     | 1.47 | 0.00 | 0.00 | 0.72 | 0.12 | 8 | Endothelial |
| Cav1      | 1.45 | 0.00 | 0.00 | 0.91 | 0.29 | 8 | Endothelial |
| Marcks    | 1.44 | 0.00 | 0.00 | 0.95 | 0.49 | 8 | Endothelial |
| Klf2      | 1.39 | 0.00 | 0.00 | 0.72 | 0.18 | 8 | Endothelial |
| Tspan7    | 1.39 | 0.00 | 0.00 | 0.83 | 0.19 | 8 | Endothelial |
| Epas1     | 1.36 | 0.00 | 0.00 | 0.86 | 0.23 | 8 | Endothelial |
| Btbd3     | 1.35 | 0.00 | 0.00 | 0.64 | 0.13 | 8 | Endothelial |
| Ly6c2     | 1.34 | 0.00 | 0.00 | 0.69 | 0.13 | 8 | Endothelial |
| Slc43a3   | 1.33 | 0.00 | 0.00 | 0.76 | 0.20 | 8 | Endothelial |
| Serinc3   | 1.32 | 0.00 | 0.00 | 0.82 | 0.30 | 8 | Endothelial |
| Plcb4     | 1.27 | 0.00 | 0.00 | 0.59 | 0.13 | 8 | Endothelial |

|          |      |      |      |      |      |   |             |
|----------|------|------|------|------|------|---|-------------|
| Slc9a3r2 | 1.25 | 0.00 | 0.00 | 0.76 | 0.19 | 8 | Endothelial |
| Cldn5    | 1.25 | 0.00 | 0.00 | 0.87 | 0.20 | 8 | Endothelial |
| Myzap    | 1.23 | 0.00 | 0.00 | 0.66 | 0.13 | 8 | Endothelial |
| Clec1a   | 1.23 | 0.00 | 0.00 | 0.71 | 0.15 | 8 | Endothelial |
| Gpr116   | 1.20 | 0.00 | 0.00 | 0.94 | 0.36 | 8 | Endothelial |
| Cd36     | 1.19 | 0.00 | 0.00 | 0.88 | 0.31 | 8 | Endothelial |
| Scarb1   | 1.18 | 0.00 | 0.00 | 0.49 | 0.08 | 8 | Endothelial |
| Fas      | 1.17 | 0.00 | 0.00 | 0.54 | 0.08 | 8 | Endothelial |
| Peg3     | 1.16 | 0.00 | 0.00 | 0.73 | 0.29 | 8 | Endothelial |
| Egfl7    | 1.16 | 0.00 | 0.00 | 0.91 | 0.26 | 8 | Endothelial |
| S1pr1    | 1.13 | 0.00 | 0.00 | 0.67 | 0.17 | 8 | Endothelial |
| Sema7a   | 1.13 | 0.00 | 0.00 | 0.42 | 0.03 | 8 | Endothelial |
| Thbd     | 1.12 | 0.00 | 0.00 | 0.75 | 0.23 | 8 | Endothelial |
| Ybx1     | 1.11 | 0.00 | 0.00 | 0.95 | 0.63 | 8 | Endothelial |
| Nfkbia   | 1.11 | 0.00 | 0.00 | 0.82 | 0.36 | 8 | Endothelial |
| Plvap    | 1.11 | 0.00 | 0.00 | 0.58 | 0.11 | 8 | Endothelial |
| BC028528 | 1.10 | 0.00 | 0.00 | 0.85 | 0.27 | 8 | Endothelial |
| Mxd4     | 1.09 | 0.00 | 0.00 | 0.81 | 0.36 | 8 | Endothelial |
| Igfbp3   | 1.09 | 0.00 | 0.00 | 0.43 | 0.06 | 8 | Endothelial |
| Tcn2     | 1.07 | 0.00 | 0.00 | 0.49 | 0.10 | 8 | Endothelial |
| Clic5    | 1.07 | 0.00 | 0.00 | 0.75 | 0.21 | 8 | Endothelial |
| Gimap5   | 1.07 | 0.00 | 0.00 | 0.53 | 0.10 | 8 | Endothelial |
| Icam2    | 1.07 | 0.00 | 0.00 | 0.65 | 0.14 | 8 | Endothelial |
| Cav2     | 1.05 | 0.00 | 0.00 | 0.66 | 0.17 | 8 | Endothelial |
| Ddit4    | 1.05 | 0.00 | 0.00 | 0.42 | 0.06 | 8 | Endothelial |
| Ppp1r2   | 1.05 | 0.00 | 0.00 | 0.71 | 0.25 | 8 | Endothelial |
| Ppap2a   | 1.04 | 0.00 | 0.00 | 0.66 | 0.18 | 8 | Endothelial |
| Eltld1   | 1.04 | 0.00 | 0.00 | 0.45 | 0.06 | 8 | Endothelial |
| Sult1a1  | 1.03 | 0.00 | 0.00 | 0.41 | 0.05 | 8 | Endothelial |
| Esam     | 1.03 | 0.00 | 0.00 | 0.68 | 0.16 | 8 | Endothelial |
| Tmem100  | 1.02 | 0.00 | 0.00 | 0.85 | 0.28 | 8 | Endothelial |
| Timp3    | 1.02 | 0.00 | 0.00 | 0.84 | 0.34 | 8 | Endothelial |
| Itm2b    | 1.02 | 0.00 | 0.00 | 0.97 | 0.75 | 8 | Endothelial |
| Pecam1   | 1.02 | 0.00 | 0.00 | 0.80 | 0.22 | 8 | Endothelial |
| Emcn     | 1.02 | 0.00 | 0.00 | 0.50 | 0.10 | 8 | Endothelial |
| Acvrl1   | 1.01 | 0.00 | 0.00 | 0.66 | 0.16 | 8 | Endothelial |
| Clec14a  | 1.00 | 0.00 | 0.00 | 0.67 | 0.16 | 8 | Endothelial |
| Ace      | 0.98 | 0.00 | 0.00 | 0.57 | 0.12 | 8 | Endothelial |
| Cd93     | 0.98 | 0.00 | 0.00 | 0.76 | 0.20 | 8 | Endothelial |
| Sox17    | 0.97 | 0.00 | 0.00 | 0.58 | 0.12 | 8 | Endothelial |
| Cep85l   | 0.96 | 0.00 | 0.00 | 0.39 | 0.06 | 8 | Endothelial |
| Ehd4     | 0.96 | 0.00 | 0.00 | 0.77 | 0.26 | 8 | Endothelial |
| Crip2    | 0.96 | 0.00 | 0.00 | 0.85 | 0.40 | 8 | Endothelial |

|               |      |      |      |      |      |   |             |
|---------------|------|------|------|------|------|---|-------------|
| Ece1          | 0.96 | 0.00 | 0.00 | 0.70 | 0.24 | 8 | Endothelial |
| Myliip        | 0.94 | 0.00 | 0.00 | 0.38 | 0.06 | 8 | Endothelial |
| Prss23        | 0.92 | 0.00 | 0.00 | 0.38 | 0.06 | 8 | Endothelial |
| Foxf1         | 0.91 | 0.00 | 0.00 | 0.47 | 0.11 | 8 | Endothelial |
| Pcdh17        | 0.91 | 0.00 | 0.00 | 0.68 | 0.19 | 8 | Endothelial |
| Clca1         | 0.90 | 0.00 | 0.00 | 0.31 | 0.03 | 8 | Endothelial |
| Acer2         | 0.90 | 0.00 | 0.00 | 0.46 | 0.09 | 8 | Endothelial |
| Prx           | 0.90 | 0.00 | 0.00 | 0.44 | 0.09 | 8 | Endothelial |
| Erg           | 0.90 | 0.00 | 0.00 | 0.53 | 0.12 | 8 | Endothelial |
| Slfn5         | 0.89 | 0.00 | 0.00 | 0.45 | 0.09 | 8 | Endothelial |
| Gimap6        | 0.89 | 0.00 | 0.00 | 0.58 | 0.15 | 8 | Endothelial |
| Tie1          | 0.88 | 0.00 | 0.00 | 0.49 | 0.10 | 8 | Endothelial |
| Grrp1         | 0.88 | 0.00 | 0.00 | 0.34 | 0.03 | 8 | Endothelial |
| Tek           | 0.87 | 0.00 | 0.00 | 0.51 | 0.12 | 8 | Endothelial |
| Ptprb         | 0.86 | 0.00 | 0.00 | 0.72 | 0.20 | 8 | Endothelial |
| Rasip1        | 0.85 | 0.00 | 0.00 | 0.51 | 0.11 | 8 | Endothelial |
| Slco2a1       | 0.85 | 0.00 | 0.00 | 0.47 | 0.10 | 8 | Endothelial |
| Unc45b        | 0.84 | 0.00 | 0.00 | 0.39 | 0.05 | 8 | Endothelial |
| Cdh5          | 0.82 | 0.00 | 0.00 | 0.76 | 0.21 | 8 | Endothelial |
| Zbtb16        | 0.81 | 0.00 | 0.00 | 0.34 | 0.05 | 8 | Endothelial |
| Calcr1        | 0.78 | 0.00 | 0.00 | 0.75 | 0.24 | 8 | Endothelial |
| Adam15        | 0.78 | 0.00 | 0.00 | 0.37 | 0.07 | 8 | Endothelial |
| Ackr3         | 0.75 | 0.00 | 0.00 | 0.29 | 0.04 | 8 | Endothelial |
| Arl4d         | 0.73 | 0.00 | 0.00 | 0.25 | 0.03 | 8 | Endothelial |
| 6430548M08Rik | 0.70 | 0.00 | 0.00 | 0.31 | 0.04 | 8 | Endothelial |
| Robo4         | 0.69 | 0.00 | 0.00 | 0.32 | 0.05 | 8 | Endothelial |
| Tsc22d3       | 0.92 | 0.00 | 0.00 | 0.68 | 0.23 | 8 | Endothelial |
| Tspan13       | 0.80 | 0.00 | 0.00 | 0.72 | 0.23 | 8 | Endothelial |
| Gpihbp1       | 0.93 | 0.00 | 0.00 | 0.55 | 0.15 | 8 | Endothelial |
| Fendrr        | 0.81 | 0.00 | 0.00 | 0.63 | 0.19 | 8 | Endothelial |
| Qsox1         | 0.84 | 0.00 | 0.00 | 0.41 | 0.09 | 8 | Endothelial |
| Lgals9        | 0.90 | 0.00 | 0.00 | 0.50 | 0.13 | 8 | Endothelial |
| Flt1          | 0.86 | 0.00 | 0.00 | 0.54 | 0.14 | 8 | Endothelial |
| Mcam          | 0.74 | 0.00 | 0.00 | 0.49 | 0.12 | 8 | Endothelial |
| Txnip         | 0.95 | 0.00 | 0.00 | 0.68 | 0.24 | 8 | Endothelial |
| Ier3          | 0.89 | 0.00 | 0.00 | 0.48 | 0.12 | 8 | Endothelial |
| Grap          | 0.86 | 0.00 | 0.00 | 0.49 | 0.12 | 8 | Endothelial |
| Ier2          | 0.96 | 0.00 | 0.00 | 0.67 | 0.24 | 8 | Endothelial |
| Ctla2a        | 0.87 | 0.00 | 0.00 | 0.63 | 0.19 | 8 | Endothelial |
| Ldb2          | 0.81 | 0.00 | 0.00 | 0.55 | 0.15 | 8 | Endothelial |
| S100a16       | 0.79 | 0.00 | 0.00 | 0.67 | 0.22 | 8 | Endothelial |
| Carhsp1       | 0.84 | 0.00 | 0.00 | 0.48 | 0.13 | 8 | Endothelial |
| Tpt1          | 0.66 | 0.00 | 0.00 | 0.97 | 0.87 | 8 | Endothelial |

|               |      |      |      |      |      |   |             |
|---------------|------|------|------|------|------|---|-------------|
| Sgms1         | 0.83 | 0.00 | 0.00 | 0.37 | 0.08 | 8 | Endothelial |
| Jun           | 0.89 | 0.00 | 0.00 | 0.79 | 0.35 | 8 | Endothelial |
| Cyb5r3        | 0.95 | 0.00 | 0.00 | 0.77 | 0.37 | 8 | Endothelial |
| Dok4          | 0.62 | 0.00 | 0.00 | 0.30 | 0.05 | 8 | Endothelial |
| Klhl5         | 0.78 | 0.00 | 0.00 | 0.48 | 0.13 | 8 | Endothelial |
| Ankrd33b      | 0.69 | 0.00 | 0.00 | 0.29 | 0.05 | 8 | Endothelial |
| Nostrin       | 0.78 | 0.00 | 0.00 | 0.50 | 0.14 | 8 | Endothelial |
| Emp1          | 0.87 | 0.00 | 0.00 | 0.61 | 0.21 | 8 | Endothelial |
| Smagp         | 0.62 | 0.00 | 0.00 | 0.28 | 0.05 | 8 | Endothelial |
| Ripply3       | 0.68 | 0.00 | 0.00 | 0.46 | 0.12 | 8 | Endothelial |
| Dusp1         | 0.81 | 0.00 | 0.00 | 0.52 | 0.16 | 8 | Endothelial |
| Npr3          | 0.85 | 0.00 | 0.00 | 0.45 | 0.12 | 8 | Endothelial |
| Ptrf          | 0.90 | 0.00 | 0.00 | 0.74 | 0.34 | 8 | Endothelial |
| Rps6          | 0.72 | 0.00 | 0.00 | 0.95 | 0.82 | 8 | Endothelial |
| Casz1         | 0.83 | 0.00 | 0.00 | 0.45 | 0.13 | 8 | Endothelial |
| Tcf4          | 0.91 | 0.00 | 0.00 | 0.79 | 0.40 | 8 | Endothelial |
| Hey1          | 0.68 | 0.00 | 0.00 | 0.26 | 0.04 | 8 | Endothelial |
| Foxp1         | 0.94 | 0.00 | 0.00 | 0.80 | 0.43 | 8 | Endothelial |
| Efnb2         | 0.77 | 0.00 | 0.00 | 0.48 | 0.14 | 8 | Endothelial |
| Gm26384       | 0.79 | 0.00 | 0.00 | 0.84 | 0.47 | 8 | Endothelial |
| Klf7          | 0.86 | 0.00 | 0.00 | 0.54 | 0.17 | 8 | Endothelial |
| Slk           | 0.91 | 0.00 | 0.00 | 0.79 | 0.42 | 8 | Endothelial |
| Grasp         | 0.67 | 0.00 | 0.00 | 0.32 | 0.07 | 8 | Endothelial |
| Tmem88        | 0.72 | 0.00 | 0.00 | 0.40 | 0.10 | 8 | Endothelial |
| Stmn2         | 0.87 | 0.00 | 0.00 | 0.49 | 0.14 | 8 | Endothelial |
| Palmd         | 0.81 | 0.00 | 0.00 | 0.44 | 0.12 | 8 | Endothelial |
| Ly6e          | 0.72 | 0.00 | 0.00 | 0.85 | 0.41 | 8 | Endothelial |
| Cyyr1         | 0.62 | 0.00 | 0.00 | 0.48 | 0.14 | 8 | Endothelial |
| Meis2         | 0.78 | 0.00 | 0.00 | 0.41 | 0.11 | 8 | Endothelial |
| Efcab4a       | 0.61 | 0.00 | 0.00 | 0.30 | 0.06 | 8 | Endothelial |
| Fxyd5         | 0.72 | 0.00 | 0.00 | 0.52 | 0.17 | 8 | Endothelial |
| 9430020K01Rik | 0.66 | 0.00 | 0.00 | 0.43 | 0.12 | 8 | Endothelial |
| Trp53i11      | 0.62 | 0.00 | 0.00 | 0.26 | 0.05 | 8 | Endothelial |
| Ppp1r16b      | 0.63 | 0.00 | 0.00 | 0.36 | 0.09 | 8 | Endothelial |
| Sepp1         | 0.86 | 0.00 | 0.00 | 0.77 | 0.40 | 8 | Endothelial |
| Kdsr          | 0.69 | 0.00 | 0.00 | 0.33 | 0.08 | 8 | Endothelial |
| Plaur         | 0.54 | 0.00 | 0.00 | 0.26 | 0.05 | 8 | Endothelial |
| Id1           | 0.84 | 0.00 | 0.00 | 0.59 | 0.23 | 8 | Endothelial |
| Hspb1         | 0.90 | 0.00 | 0.00 | 0.43 | 0.13 | 8 | Endothelial |
| Fam117b       | 0.60 | 0.00 | 0.00 | 0.31 | 0.07 | 8 | Endothelial |
| Rhoj          | 0.74 | 0.00 | 0.00 | 0.52 | 0.17 | 8 | Endothelial |
| Sash1         | 0.75 | 0.00 | 0.00 | 0.42 | 0.12 | 8 | Endothelial |
| Stt3b         | 0.83 | 0.00 | 0.00 | 0.50 | 0.18 | 8 | Endothelial |

|               |      |      |      |      |      |   |             |
|---------------|------|------|------|------|------|---|-------------|
| Rdx           | 0.86 | 0.00 | 0.00 | 0.79 | 0.44 | 8 | Endothelial |
| Jam2          | 0.58 | 0.00 | 0.00 | 0.27 | 0.06 | 8 | Endothelial |
| Ecscr         | 0.61 | 0.00 | 0.00 | 0.51 | 0.16 | 8 | Endothelial |
| Kank3         | 0.66 | 0.00 | 0.00 | 0.45 | 0.13 | 8 | Endothelial |
| Rps27         | 0.56 | 0.00 | 0.00 | 0.96 | 0.81 | 8 | Endothelial |
| Tm4sf1        | 0.73 | 0.00 | 0.00 | 0.57 | 0.20 | 8 | Endothelial |
| Arap3         | 0.54 | 0.00 | 0.00 | 0.30 | 0.07 | 8 | Endothelial |
| Vat1          | 0.63 | 0.00 | 0.00 | 0.33 | 0.08 | 8 | Endothelial |
| Sdpr          | 0.61 | 0.00 | 0.00 | 0.90 | 0.51 | 8 | Endothelial |
| Cish          | 0.58 | 0.00 | 0.00 | 0.30 | 0.07 | 8 | Endothelial |
| Dock9         | 0.62 | 0.00 | 0.00 | 0.34 | 0.09 | 8 | Endothelial |
| Tspan18       | 0.61 | 0.00 | 0.00 | 0.43 | 0.13 | 8 | Endothelial |
| Fnbp1l        | 0.84 | 0.00 | 0.00 | 0.59 | 0.24 | 8 | Endothelial |
| 2810025M15Rik | 0.63 | 0.00 | 0.00 | 0.40 | 0.12 | 8 | Endothelial |
| Hyal2         | 0.60 | 0.00 | 0.00 | 0.30 | 0.07 | 8 | Endothelial |
| Hoxa5         | 0.67 | 0.00 | 0.00 | 0.41 | 0.12 | 8 | Endothelial |
| Efnb1         | 0.68 | 0.00 | 0.00 | 0.44 | 0.14 | 8 | Endothelial |
| Tpst2         | 0.66 | 0.00 | 0.00 | 0.39 | 0.11 | 8 | Endothelial |
| Fli1          | 0.69 | 0.00 | 0.00 | 0.38 | 0.11 | 8 | Endothelial |
| Fbxw2         | 0.75 | 0.00 | 0.00 | 0.47 | 0.16 | 8 | Endothelial |
| Cd59a         | 0.75 | 0.00 | 0.00 | 0.32 | 0.08 | 8 | Endothelial |
| Sh2b3         | 0.58 | 0.00 | 0.00 | 0.32 | 0.08 | 8 | Endothelial |
| Sema6a        | 0.66 | 0.00 | 0.00 | 0.38 | 0.11 | 8 | Endothelial |
| Tenc1         | 0.68 | 0.00 | 0.00 | 0.42 | 0.14 | 8 | Endothelial |
| Tbx3          | 0.71 | 0.00 | 0.00 | 0.53 | 0.20 | 8 | Endothelial |
| Rasgrp2       | 0.57 | 0.00 | 0.00 | 0.34 | 0.09 | 8 | Endothelial |
| Rhoc          | 0.69 | 0.00 | 0.00 | 0.53 | 0.20 | 8 | Endothelial |
| Dennd3        | 0.53 | 0.00 | 0.00 | 0.29 | 0.07 | 8 | Endothelial |
| Galnt18       | 0.63 | 0.00 | 0.00 | 0.36 | 0.10 | 8 | Endothelial |
| Gcc2          | 0.75 | 0.00 | 0.00 | 0.58 | 0.24 | 8 | Endothelial |
| Adcy4         | 0.55 | 0.00 | 0.00 | 0.31 | 0.08 | 8 | Endothelial |
| Sec14l1       | 0.66 | 0.00 | 0.00 | 0.38 | 0.12 | 8 | Endothelial |
| Fgd5          | 0.46 | 0.00 | 0.00 | 0.26 | 0.06 | 8 | Endothelial |
| Rpl31         | 0.62 | 0.00 | 0.00 | 0.86 | 0.57 | 8 | Endothelial |
| Rab11a        | 0.71 | 0.00 | 0.00 | 0.59 | 0.25 | 8 | Endothelial |
| Nsg1          | 0.60 | 0.00 | 0.00 | 0.30 | 0.08 | 8 | Endothelial |
| Gm9846        | 0.44 | 0.00 | 0.00 | 0.98 | 0.89 | 8 | Endothelial |
| Snrk          | 0.65 | 0.00 | 0.00 | 0.45 | 0.15 | 8 | Endothelial |
| Cyp4b1        | 0.60 | 0.00 | 0.00 | 0.36 | 0.10 | 8 | Endothelial |
| Rps29         | 0.44 | 0.00 | 0.00 | 0.98 | 0.90 | 8 | Endothelial |
| Ucp2          | 0.59 | 0.00 | 0.00 | 0.37 | 0.11 | 8 | Endothelial |
| Pim3          | 0.57 | 0.00 | 0.00 | 0.27 | 0.07 | 8 | Endothelial |
| Ivns1abp      | 1.11 | 0.00 | 0.00 | 0.51 | 0.22 | 8 | Endothelial |

|               |      |      |      |      |      |   |             |
|---------------|------|------|------|------|------|---|-------------|
| Sgk1          | 0.76 | 0.00 | 0.00 | 0.49 | 0.18 | 8 | Endothelial |
| Eng           | 0.57 | 0.00 | 0.00 | 0.36 | 0.11 | 8 | Endothelial |
| Ceacam1       | 0.53 | 0.00 | 0.00 | 0.32 | 0.09 | 8 | Endothelial |
| Podxl         | 0.52 | 0.00 | 0.00 | 0.36 | 0.10 | 8 | Endothelial |
| Trib2         | 0.61 | 0.00 | 0.00 | 0.35 | 0.10 | 8 | Endothelial |
| Fkbp5         | 0.58 | 0.00 | 0.00 | 0.31 | 0.08 | 8 | Endothelial |
| Rasgef1a      | 0.57 | 0.00 | 0.00 | 0.31 | 0.08 | 8 | Endothelial |
| Ets2          | 0.58 | 0.00 | 0.00 | 0.37 | 0.11 | 8 | Endothelial |
| Cnn3          | 0.57 | 0.00 | 0.00 | 0.65 | 0.29 | 8 | Endothelial |
| S100a13       | 0.74 | 0.00 | 0.00 | 0.56 | 0.25 | 8 | Endothelial |
| Fkbp1a        | 0.62 | 0.00 | 0.00 | 0.74 | 0.40 | 8 | Endothelial |
| Afap1l1       | 0.54 | 0.00 | 0.00 | 0.47 | 0.17 | 8 | Endothelial |
| Rgs12         | 0.60 | 0.00 | 0.00 | 0.37 | 0.11 | 8 | Endothelial |
| Arl4a         | 0.63 | 0.00 | 0.00 | 0.35 | 0.11 | 8 | Endothelial |
| Clic4         | 0.70 | 0.00 | 0.00 | 0.61 | 0.28 | 8 | Endothelial |
| Clic1         | 0.67 | 0.00 | 0.00 | 0.70 | 0.37 | 8 | Endothelial |
| Tjp1          | 0.57 | 0.00 | 0.00 | 0.44 | 0.15 | 8 | Endothelial |
| Rapgef5       | 0.53 | 0.00 | 0.00 | 0.34 | 0.10 | 8 | Endothelial |
| Plcg1         | 0.63 | 0.00 | 0.00 | 0.43 | 0.15 | 8 | Endothelial |
| Syn3          | 0.70 | 0.00 | 0.00 | 0.42 | 0.15 | 8 | Endothelial |
| Edn1          | 0.73 | 0.00 | 0.00 | 0.31 | 0.09 | 8 | Endothelial |
| Ifitm2        | 0.65 | 0.00 | 0.00 | 0.65 | 0.31 | 8 | Endothelial |
| Cd97          | 0.57 | 0.00 | 0.00 | 0.47 | 0.17 | 8 | Endothelial |
| Gstm1         | 0.61 | 0.00 | 0.00 | 0.41 | 0.14 | 8 | Endothelial |
| Prkce         | 0.51 | 0.00 | 0.00 | 0.27 | 0.07 | 8 | Endothelial |
| Cd9           | 0.56 | 0.00 | 0.00 | 0.70 | 0.34 | 8 | Endothelial |
| Srgn          | 0.51 | 0.00 | 0.00 | 0.69 | 0.32 | 8 | Endothelial |
| 4931406P16Rik | 0.60 | 0.00 | 0.00 | 0.46 | 0.17 | 8 | Endothelial |
| Socs3         | 0.49 | 0.00 | 0.00 | 0.26 | 0.07 | 8 | Endothelial |
| Tmem204       | 0.58 | 0.00 | 0.00 | 0.42 | 0.15 | 8 | Endothelial |
| Tax1bp1       | 0.68 | 0.00 | 0.00 | 0.85 | 0.63 | 8 | Endothelial |
| Fth1          | 0.52 | 0.00 | 0.00 | 0.94 | 0.81 | 8 | Endothelial |
| St3gal6       | 0.51 | 0.00 | 0.00 | 0.30 | 0.09 | 8 | Endothelial |
| Tmem2         | 0.55 | 0.00 | 0.00 | 0.40 | 0.14 | 8 | Endothelial |
| Prkd2         | 0.51 | 0.00 | 0.00 | 0.30 | 0.09 | 8 | Endothelial |
| Ccdc28b       | 0.55 | 0.00 | 0.00 | 0.32 | 0.10 | 8 | Endothelial |
| Car4          | 0.66 | 0.00 | 0.00 | 0.27 | 0.07 | 8 | Endothelial |
| H2-T23        | 0.55 | 0.00 | 0.00 | 0.36 | 0.12 | 8 | Endothelial |
| Cbfa2t3       | 0.54 | 0.00 | 0.00 | 0.40 | 0.14 | 8 | Endothelial |
| Cttnbp2nl     | 0.51 | 0.00 | 0.00 | 0.33 | 0.10 | 8 | Endothelial |
| Arhgef15      | 0.42 | 0.00 | 0.00 | 0.26 | 0.07 | 8 | Endothelial |
| Fmo1          | 0.49 | 0.00 | 0.00 | 0.34 | 0.11 | 8 | Endothelial |
| Ehd1          | 0.54 | 0.00 | 0.00 | 0.34 | 0.11 | 8 | Endothelial |

|               |      |      |      |      |      |   |             |
|---------------|------|------|------|------|------|---|-------------|
| Ctla2b        | 0.47 | 0.00 | 0.00 | 0.25 | 0.07 | 8 | Endothelial |
| Nkd1          | 0.53 | 0.00 | 0.00 | 0.33 | 0.11 | 8 | Endothelial |
| Arhgap29      | 0.61 | 0.00 | 0.00 | 0.50 | 0.21 | 8 | Endothelial |
| Mest          | 0.42 | 0.00 | 0.00 | 0.49 | 0.19 | 8 | Endothelial |
| Slc6a6        | 0.65 | 0.00 | 0.00 | 0.54 | 0.25 | 8 | Endothelial |
| Hdac7         | 0.55 | 0.00 | 0.00 | 0.37 | 0.13 | 8 | Endothelial |
| Sptbn1        | 0.52 | 0.00 | 0.00 | 0.82 | 0.54 | 8 | Endothelial |
| Ifitm3        | 0.54 | 0.00 | 0.00 | 0.71 | 0.39 | 8 | Endothelial |
| Mob2          | 0.51 | 0.00 | 0.00 | 0.28 | 0.08 | 8 | Endothelial |
| Lphn3         | 0.48 | 0.00 | 0.00 | 0.26 | 0.07 | 8 | Endothelial |
| Ubald2        | 0.57 | 0.00 | 0.00 | 0.38 | 0.14 | 8 | Endothelial |
| Dnajc8        | 0.64 | 0.00 | 0.00 | 0.71 | 0.42 | 8 | Endothelial |
| 2900026A02Rik | 0.46 | 0.00 | 0.00 | 0.26 | 0.07 | 8 | Endothelial |
| Pttg1ip       | 0.56 | 0.00 | 0.00 | 0.41 | 0.16 | 8 | Endothelial |
| Mknk2         | 0.53 | 0.00 | 0.00 | 0.33 | 0.11 | 8 | Endothelial |
| Jup           | 0.52 | 0.00 | 0.00 | 0.41 | 0.15 | 8 | Endothelial |
| Ets1          | 0.47 | 0.00 | 0.00 | 0.55 | 0.24 | 8 | Endothelial |
| Cyth3         | 0.54 | 0.00 | 0.00 | 0.53 | 0.24 | 8 | Endothelial |
| Dusp3         | 0.57 | 0.00 | 0.00 | 0.45 | 0.19 | 8 | Endothelial |
| Fam63a        | 0.50 | 0.00 | 0.00 | 0.28 | 0.09 | 8 | Endothelial |
| Itga6         | 0.50 | 0.00 | 0.00 | 0.36 | 0.13 | 8 | Endothelial |
| Myct1         | 0.41 | 0.00 | 0.00 | 0.36 | 0.12 | 8 | Endothelial |
| Ppap2b        | 0.56 | 0.00 | 0.00 | 0.52 | 0.23 | 8 | Endothelial |
| Efna1         | 0.46 | 0.00 | 0.00 | 0.25 | 0.07 | 8 | Endothelial |
| Gngt2         | 0.35 | 0.00 | 0.00 | 0.31 | 0.10 | 8 | Endothelial |
| Hilpda        | 0.48 | 0.00 | 0.00 | 0.26 | 0.08 | 8 | Endothelial |
| Bst2          | 0.48 | 0.00 | 0.00 | 0.36 | 0.13 | 8 | Endothelial |
| Rasgrp3       | 0.38 | 0.00 | 0.00 | 0.36 | 0.12 | 8 | Endothelial |
| Eef1a1        | 0.36 | 0.00 | 0.00 | 0.96 | 0.87 | 8 | Endothelial |
| mt-Rnr2       | 0.38 | 0.00 | 0.00 | 1.00 | 0.99 | 8 | Endothelial |
| Leprot        | 0.62 | 0.00 | 0.00 | 0.60 | 0.32 | 8 | Endothelial |
| Hpcal1        | 0.53 | 0.00 | 0.00 | 0.37 | 0.14 | 8 | Endothelial |
| Ptgs1         | 0.54 | 0.00 | 0.00 | 0.30 | 0.10 | 8 | Endothelial |
| Gm11808       | 0.42 | 0.00 | 0.00 | 0.90 | 0.77 | 8 | Endothelial |
| Rap1a         | 0.55 | 0.00 | 0.00 | 0.58 | 0.29 | 8 | Endothelial |
| Rin2          | 0.58 | 0.00 | 0.00 | 0.38 | 0.15 | 8 | Endothelial |
| Rcsd1         | 0.44 | 0.00 | 0.00 | 0.26 | 0.08 | 8 | Endothelial |
| Gm7808        | 0.49 | 0.00 | 0.00 | 0.82 | 0.59 | 8 | Endothelial |
| Gnb2          | 0.55 | 0.00 | 0.00 | 0.65 | 0.37 | 8 | Endothelial |
| Junb          | 0.44 | 0.00 | 0.00 | 0.45 | 0.19 | 8 | Endothelial |
| Smarca2       | 0.60 | 0.00 | 0.00 | 0.62 | 0.34 | 8 | Endothelial |
| Klf9          | 0.52 | 0.00 | 0.00 | 0.44 | 0.19 | 8 | Endothelial |
| Clec2d        | 0.43 | 0.00 | 0.00 | 0.27 | 0.09 | 8 | Endothelial |

|          |      |      |      |      |      |   |             |
|----------|------|------|------|------|------|---|-------------|
| Crip1    | 0.54 | 0.00 | 0.00 | 0.75 | 0.47 | 8 | Endothelial |
| Sparcl1  | 0.48 | 0.00 | 0.00 | 0.69 | 0.38 | 8 | Endothelial |
| Ptprg    | 0.49 | 0.00 | 0.00 | 0.33 | 0.12 | 8 | Endothelial |
| Kit      | 0.33 | 0.00 | 0.00 | 0.26 | 0.08 | 8 | Endothelial |
| Itpril2  | 0.61 | 0.00 | 0.00 | 0.39 | 0.16 | 8 | Endothelial |
| Numb     | 0.42 | 0.00 | 0.00 | 0.25 | 0.08 | 8 | Endothelial |
| Rps11    | 0.39 | 0.00 | 0.00 | 0.91 | 0.75 | 8 | Endothelial |
| Arglu1   | 0.55 | 0.00 | 0.00 | 0.68 | 0.41 | 8 | Endothelial |
| Cd47     | 0.57 | 0.00 | 0.00 | 0.69 | 0.42 | 8 | Endothelial |
| Arpc3    | 0.53 | 0.00 | 0.00 | 0.52 | 0.25 | 8 | Endothelial |
| Znrf1    | 0.45 | 0.00 | 0.00 | 0.30 | 0.11 | 8 | Endothelial |
| Bcam     | 0.43 | 0.00 | 0.00 | 0.26 | 0.09 | 8 | Endothelial |
| Hmgn5    | 0.69 | 0.00 | 0.00 | 0.50 | 0.26 | 8 | Endothelial |
| Cdk14    | 0.48 | 0.00 | 0.00 | 0.30 | 0.11 | 8 | Endothelial |
| Col4a3bp | 0.53 | 0.00 | 0.00 | 0.36 | 0.15 | 8 | Endothelial |
| Pitpnc1  | 0.40 | 0.00 | 0.00 | 0.32 | 0.12 | 8 | Endothelial |
| Lphn2    | 0.39 | 0.00 | 0.00 | 0.33 | 0.13 | 8 | Endothelial |
| Gng11    | 0.38 | 0.00 | 0.00 | 0.57 | 0.28 | 8 | Endothelial |
| Vim      | 0.39 | 0.00 | 0.00 | 0.90 | 0.65 | 8 | Endothelial |
| Zmiz1    | 0.50 | 0.00 | 0.00 | 0.45 | 0.21 | 8 | Endothelial |
| Plk2     | 0.49 | 0.00 | 0.00 | 0.37 | 0.16 | 8 | Endothelial |
| Gm10126  | 0.47 | 0.00 | 0.00 | 0.64 | 0.39 | 8 | Endothelial |
| Klf3     | 0.44 | 0.00 | 0.00 | 0.30 | 0.11 | 8 | Endothelial |
| Id3      | 0.41 | 0.00 | 0.00 | 0.74 | 0.45 | 8 | Endothelial |
| Klf13    | 0.44 | 0.00 | 0.00 | 0.38 | 0.16 | 8 | Endothelial |
| Arl2bp   | 0.44 | 0.00 | 0.00 | 0.32 | 0.13 | 8 | Endothelial |
| Gm5239   | 0.44 | 0.00 | 0.00 | 0.75 | 0.51 | 8 | Endothelial |
| Atp2b1   | 0.46 | 0.00 | 0.00 | 0.80 | 0.58 | 8 | Endothelial |
| Tinagl1  | 0.29 | 0.00 | 0.00 | 0.28 | 0.10 | 8 | Endothelial |
| Rps23    | 0.33 | 0.00 | 0.00 | 0.92 | 0.79 | 8 | Endothelial |
| Tle4     | 0.50 | 0.00 | 0.00 | 0.31 | 0.12 | 8 | Endothelial |
| Igfbp4   | 0.34 | 0.00 | 0.00 | 0.51 | 0.24 | 8 | Endothelial |
| Atp1b3   | 0.45 | 0.00 | 0.00 | 0.49 | 0.25 | 8 | Endothelial |
| Arhgap31 | 0.36 | 0.00 | 0.00 | 0.29 | 0.12 | 8 | Endothelial |
| Zcchc6   | 0.53 | 0.00 | 0.00 | 0.47 | 0.25 | 8 | Endothelial |
| Rps25    | 0.32 | 0.00 | 0.00 | 0.92 | 0.80 | 8 | Endothelial |
| Elovl5   | 0.41 | 0.00 | 0.00 | 0.34 | 0.15 | 8 | Endothelial |
| Zfp36    | 0.36 | 0.00 | 0.00 | 0.36 | 0.16 | 8 | Endothelial |
| Zfp945   | 0.44 | 0.00 | 0.00 | 0.30 | 0.12 | 8 | Endothelial |
| Rab5c    | 0.40 | 0.00 | 0.00 | 0.29 | 0.12 | 8 | Endothelial |
| Gimap1   | 0.35 | 0.00 | 0.00 | 0.32 | 0.13 | 8 | Endothelial |
| Rps14    | 0.27 | 0.00 | 0.00 | 0.97 | 0.92 | 8 | Endothelial |
| Cd34     | 0.33 | 0.00 | 0.00 | 0.42 | 0.19 | 8 | Endothelial |

|          |      |      |      |      |      |   |             |
|----------|------|------|------|------|------|---|-------------|
| Gnaq     | 0.43 | 0.00 | 0.00 | 0.42 | 0.21 | 8 | Endothelial |
| Zeb1     | 0.35 | 0.00 | 0.00 | 0.28 | 0.11 | 8 | Endothelial |
| Cirbp    | 0.40 | 0.00 | 0.00 | 0.42 | 0.21 | 8 | Endothelial |
| Aldh2    | 0.42 | 0.00 | 0.00 | 0.56 | 0.33 | 8 | Endothelial |
| Acap2    | 0.43 | 0.00 | 0.00 | 0.40 | 0.19 | 8 | Endothelial |
| Gm24276  | 0.40 | 0.00 | 0.00 | 0.43 | 0.22 | 8 | Endothelial |
| Mgll     | 0.34 | 0.00 | 0.00 | 0.35 | 0.15 | 8 | Endothelial |
| Dram2    | 0.35 | 0.00 | 0.00 | 0.35 | 0.16 | 8 | Endothelial |
| Tmem128  | 0.38 | 0.00 | 0.00 | 0.28 | 0.12 | 8 | Endothelial |
| Arhgef12 | 0.33 | 0.00 | 0.00 | 0.45 | 0.23 | 8 | Endothelial |
| Arhgef2  | 0.43 | 0.00 | 0.00 | 0.40 | 0.20 | 8 | Endothelial |
| Adamts1  | 0.35 | 0.00 | 0.00 | 0.42 | 0.21 | 8 | Endothelial |
| Rps8     | 0.28 | 0.00 | 0.00 | 0.93 | 0.81 | 8 | Endothelial |
| Aph1a    | 0.35 | 0.00 | 0.00 | 0.28 | 0.12 | 8 | Endothelial |
| Gltscr2  | 0.39 | 0.00 | 0.00 | 0.70 | 0.47 | 8 | Endothelial |
| Cd151    | 0.32 | 0.00 | 0.00 | 0.35 | 0.16 | 8 | Endothelial |
| Mef2a    | 0.41 | 0.00 | 0.00 | 0.59 | 0.35 | 8 | Endothelial |
| Rnf144a  | 0.31 | 0.00 | 0.00 | 0.34 | 0.15 | 8 | Endothelial |
| Rac1     | 0.41 | 0.00 | 0.00 | 0.52 | 0.29 | 8 | Endothelial |
| Crk      | 0.41 | 0.00 | 0.00 | 0.34 | 0.16 | 8 | Endothelial |
| Rbpms    | 0.38 | 0.00 | 0.00 | 0.38 | 0.18 | 8 | Endothelial |
| Btg2     | 0.31 | 0.00 | 0.00 | 0.44 | 0.23 | 8 | Endothelial |
| Mpzl1    | 0.30 | 0.00 | 0.00 | 0.27 | 0.11 | 8 | Endothelial |
| Adipor2  | 0.41 | 0.00 | 0.00 | 0.26 | 0.11 | 8 | Endothelial |
| Csrp2    | 0.34 | 0.00 | 0.00 | 0.35 | 0.16 | 8 | Endothelial |
| Lxn      | 0.33 | 0.00 | 0.00 | 0.28 | 0.12 | 8 | Endothelial |
| Top1     | 0.47 | 0.00 | 0.00 | 0.64 | 0.44 | 8 | Endothelial |
| Rhoa     | 0.38 | 0.00 | 0.00 | 0.68 | 0.46 | 8 | Endothelial |
| Ddah2    | 0.35 | 0.00 | 0.00 | 0.48 | 0.26 | 8 | Endothelial |
| Med13l   | 0.33 | 0.00 | 0.00 | 0.27 | 0.12 | 8 | Endothelial |
| RPL24    | 0.34 | 0.00 | 0.00 | 0.69 | 0.45 | 8 | Endothelial |
| Hmgb1    | 0.35 | 0.00 | 0.00 | 0.79 | 0.61 | 8 | Endothelial |
| Gm10020  | 0.35 | 0.00 | 0.00 | 0.72 | 0.51 | 8 | Endothelial |
| Wasf2    | 0.35 | 0.00 | 0.00 | 0.52 | 0.30 | 8 | Endothelial |
| Notch1   | 0.33 | 0.00 | 0.00 | 0.29 | 0.13 | 8 | Endothelial |
| Ccdc85b  | 0.26 | 0.00 | 0.00 | 0.27 | 0.11 | 8 | Endothelial |
| Luzp1    | 0.39 | 0.00 | 0.00 | 0.38 | 0.19 | 8 | Endothelial |
| Ppp2r5a  | 0.36 | 0.00 | 0.00 | 0.31 | 0.14 | 8 | Endothelial |
| Skap2    | 0.28 | 0.00 | 0.00 | 0.28 | 0.12 | 8 | Endothelial |
| Hmg20b   | 0.41 | 0.00 | 0.00 | 0.54 | 0.33 | 8 | Endothelial |
| Sbds     | 0.43 | 0.00 | 0.00 | 0.41 | 0.22 | 8 | Endothelial |
| Ptpn12   | 0.32 | 0.00 | 0.00 | 0.29 | 0.13 | 8 | Endothelial |
| Eif1     | 0.32 | 0.00 | 0.00 | 0.83 | 0.67 | 8 | Endothelial |

|          |      |      |      |      |      |   |             |
|----------|------|------|------|------|------|---|-------------|
| Laptn4a  | 0.35 | 0.00 | 0.00 | 0.73 | 0.51 | 8 | Endothelial |
| Becn1    | 0.36 | 0.00 | 0.00 | 0.30 | 0.14 | 8 | Endothelial |
| Uaca     | 0.33 | 0.00 | 0.00 | 0.30 | 0.14 | 8 | Endothelial |
| Pmp22    | 0.38 | 0.00 | 0.00 | 0.53 | 0.31 | 8 | Endothelial |
| Rpl28    | 0.37 | 0.00 | 0.00 | 0.71 | 0.53 | 8 | Endothelial |
| Dpysl2   | 0.37 | 0.00 | 0.00 | 0.35 | 0.17 | 8 | Endothelial |
| Nav1     | 0.29 | 0.00 | 0.00 | 0.26 | 0.11 | 8 | Endothelial |
| Gnai2    | 0.34 | 0.00 | 0.00 | 0.60 | 0.38 | 8 | Endothelial |
| Arpc1b   | 0.27 | 0.00 | 0.00 | 0.60 | 0.37 | 8 | Endothelial |
| Heg1     | 0.25 | 0.00 | 0.00 | 0.33 | 0.16 | 8 | Endothelial |
| Tmem50a  | 0.39 | 0.00 | 0.00 | 0.65 | 0.44 | 8 | Endothelial |
| Rpl15    | 0.31 | 0.00 | 0.00 | 0.78 | 0.58 | 8 | Endothelial |
| Kras     | 0.38 | 0.00 | 0.00 | 0.35 | 0.18 | 8 | Endothelial |
| Tmf1     | 0.33 | 0.00 | 0.00 | 0.35 | 0.18 | 8 | Endothelial |
| Rassf1   | 0.35 | 0.00 | 0.00 | 0.29 | 0.14 | 8 | Endothelial |
| Map7d1   | 0.34 | 0.00 | 0.00 | 0.35 | 0.18 | 8 | Endothelial |
| mt-Atp6  | 0.26 | 0.00 | 0.00 | 0.93 | 0.84 | 8 | Endothelial |
| Qk       | 0.39 | 0.00 | 0.00 | 0.49 | 0.29 | 8 | Endothelial |
| Phf20l1  | 0.42 | 0.00 | 0.00 | 0.47 | 0.28 | 8 | Endothelial |
| Clk1     | 0.35 | 0.00 | 0.00 | 0.55 | 0.35 | 8 | Endothelial |
| Gpi1     | 0.29 | 0.00 | 0.00 | 0.29 | 0.14 | 8 | Endothelial |
| Abi1     | 0.39 | 0.00 | 0.00 | 0.40 | 0.22 | 8 | Endothelial |
| Rpl38    | 0.28 | 0.00 | 0.00 | 0.86 | 0.73 | 8 | Endothelial |
| Zmym5    | 0.36 | 0.00 | 0.00 | 0.37 | 0.20 | 8 | Endothelial |
| Sh3glb1  | 0.39 | 0.00 | 0.00 | 0.60 | 0.40 | 8 | Endothelial |
| Tsc22d1  | 0.36 | 0.00 | 0.00 | 0.53 | 0.33 | 8 | Endothelial |
| Smc4     | 0.26 | 0.00 | 0.00 | 0.56 | 0.34 | 8 | Endothelial |
| Rpl9-ps6 | 0.27 | 0.00 | 0.00 | 0.87 | 0.73 | 8 | Endothelial |
| Actn4    | 0.35 | 0.00 | 0.00 | 0.48 | 0.29 | 8 | Endothelial |
| Rpl27    | 0.29 | 0.00 | 0.00 | 0.84 | 0.69 | 8 | Endothelial |
| Gm10263  | 0.26 | 0.00 | 0.00 | 0.89 | 0.76 | 8 | Endothelial |
| Rpl9     | 0.30 | 0.00 | 0.00 | 0.80 | 0.62 | 8 | Endothelial |
| Hes1     | 0.37 | 0.00 | 0.00 | 0.48 | 0.29 | 8 | Endothelial |
| Tacc1    | 0.34 | 0.00 | 0.00 | 0.40 | 0.22 | 8 | Endothelial |
| Zfp326   | 0.41 | 0.00 | 0.00 | 0.41 | 0.23 | 8 | Endothelial |
| Plec     | 0.29 | 0.00 | 0.00 | 0.27 | 0.12 | 8 | Endothelial |
| Dazap2   | 0.31 | 0.00 | 0.00 | 0.38 | 0.20 | 8 | Endothelial |
| Tead2    | 0.27 | 0.00 | 0.00 | 0.26 | 0.12 | 8 | Endothelial |
| Cfl1     | 0.28 | 0.00 | 0.00 | 0.78 | 0.57 | 8 | Endothelial |
| Ctnna1   | 0.30 | 0.00 | 0.00 | 0.56 | 0.36 | 8 | Endothelial |
| Fcho2    | 0.31 | 0.00 | 0.00 | 0.36 | 0.19 | 8 | Endothelial |
| Clip1    | 0.40 | 0.00 | 0.00 | 0.37 | 0.20 | 8 | Endothelial |
| Rpl17    | 0.31 | 0.00 | 0.00 | 0.73 | 0.53 | 8 | Endothelial |

|               |      |      |      |      |      |   |             |
|---------------|------|------|------|------|------|---|-------------|
| Twf1          | 0.33 | 0.00 | 0.00 | 0.31 | 0.16 | 8 | Endothelial |
| Gm6133        | 0.30 | 0.00 | 0.00 | 0.54 | 0.33 | 8 | Endothelial |
| Baz2b         | 0.37 | 0.00 | 0.00 | 0.47 | 0.29 | 8 | Endothelial |
| Gkap1         | 0.32 | 0.00 | 0.00 | 0.26 | 0.12 | 8 | Endothelial |
| D19Ertd737e   | 0.33 | 0.00 | 0.00 | 0.30 | 0.16 | 8 | Endothelial |
| Rpl29         | 0.31 | 0.00 | 0.00 | 0.65 | 0.45 | 8 | Endothelial |
| Rell1         | 0.36 | 0.00 | 0.00 | 0.36 | 0.20 | 8 | Endothelial |
| Sypl          | 0.31 | 0.00 | 0.00 | 0.43 | 0.25 | 8 | Endothelial |
| Pde4b         | 0.27 | 0.00 | 0.00 | 0.28 | 0.14 | 8 | Endothelial |
| Maf1          | 0.30 | 0.00 | 0.00 | 0.32 | 0.17 | 8 | Endothelial |
| Cmtm3         | 0.26 | 0.00 | 0.00 | 0.27 | 0.13 | 8 | Endothelial |
| Ndufc2        | 0.34 | 0.00 | 0.00 | 0.57 | 0.38 | 8 | Endothelial |
| Add3          | 0.28 | 0.00 | 0.00 | 0.46 | 0.28 | 8 | Endothelial |
| Gna13         | 0.29 | 0.00 | 0.00 | 0.27 | 0.14 | 8 | Endothelial |
| Klf6          | 0.31 | 0.00 | 0.00 | 0.54 | 0.35 | 8 | Endothelial |
| Cr1l          | 0.31 | 0.00 | 0.00 | 0.26 | 0.13 | 8 | Endothelial |
| Syf2          | 0.29 | 0.00 | 0.00 | 0.48 | 0.29 | 8 | Endothelial |
| Pttg1         | 0.27 | 0.00 | 0.00 | 0.28 | 0.14 | 8 | Endothelial |
| Eif3f         | 0.31 | 0.00 | 0.00 | 0.55 | 0.36 | 8 | Endothelial |
| Ctnnd1        | 0.25 | 0.00 | 0.00 | 0.31 | 0.16 | 8 | Endothelial |
| Zfp503        | 0.27 | 0.00 | 0.00 | 0.29 | 0.15 | 8 | Endothelial |
| Pdcd10        | 0.33 | 0.00 | 0.00 | 0.36 | 0.21 | 8 | Endothelial |
| Dnaja1        | 0.32 | 0.00 | 0.00 | 0.68 | 0.51 | 8 | Endothelial |
| Prrc2c        | 0.34 | 0.00 | 0.00 | 0.77 | 0.63 | 8 | Endothelial |
| Vamp3         | 0.26 | 0.00 | 0.00 | 0.28 | 0.14 | 8 | Endothelial |
| Serinc1       | 0.31 | 0.00 | 0.00 | 0.46 | 0.29 | 8 | Endothelial |
| Strn3         | 0.31 | 0.00 | 0.00 | 0.37 | 0.21 | 8 | Endothelial |
| Gm20091       | 0.29 | 0.00 | 0.00 | 0.38 | 0.22 | 8 | Endothelial |
| Cdc42bpa      | 0.33 | 0.00 | 0.00 | 0.28 | 0.15 | 8 | Endothelial |
| Rwdd1         | 0.27 | 0.00 | 0.00 | 0.44 | 0.27 | 8 | Endothelial |
| Dynlt1f       | 0.30 | 0.00 | 0.00 | 0.39 | 0.24 | 8 | Endothelial |
| Cd2ap         | 0.33 | 0.00 | 0.00 | 0.52 | 0.34 | 8 | Endothelial |
| Bnip2         | 0.26 | 0.00 | 0.00 | 0.47 | 0.30 | 8 | Endothelial |
| Cnih1         | 0.29 | 0.00 | 0.00 | 0.33 | 0.18 | 8 | Endothelial |
| Rb1cc1        | 0.32 | 0.00 | 0.00 | 0.46 | 0.30 | 8 | Endothelial |
| Irf2          | 0.29 | 0.00 | 0.00 | 0.40 | 0.24 | 8 | Endothelial |
| Trim56        | 0.31 | 0.00 | 0.00 | 0.31 | 0.17 | 8 | Endothelial |
| 1110008F13Rik | 0.26 | 0.00 | 0.00 | 0.29 | 0.16 | 8 | Endothelial |
| Pnpla8        | 0.27 | 0.00 | 0.00 | 0.32 | 0.18 | 8 | Endothelial |
| Atrx          | 0.31 | 0.00 | 0.00 | 0.77 | 0.65 | 8 | Endothelial |
| Rtf1          | 0.30 | 0.00 | 0.00 | 0.50 | 0.33 | 8 | Endothelial |
| Ghr           | 0.26 | 0.00 | 0.00 | 0.27 | 0.15 | 8 | Endothelial |
| Zc3h7a        | 0.28 | 0.00 | 0.00 | 0.44 | 0.28 | 8 | Endothelial |

|           |      |      |      |      |      |   |             |
|-----------|------|------|------|------|------|---|-------------|
| Gabarapl2 | 0.26 | 0.00 | 0.00 | 0.36 | 0.22 | 8 | Endothelial |
| Bclaf1    | 0.29 | 0.00 | 0.00 | 0.58 | 0.41 | 8 | Endothelial |
| Dynlt1b   | 0.28 | 0.00 | 0.00 | 0.40 | 0.25 | 8 | Endothelial |
| Dynlt1a   | 0.30 | 0.00 | 0.00 | 0.37 | 0.22 | 8 | Endothelial |
| Ubn1      | 0.28 | 0.00 | 0.00 | 0.28 | 0.16 | 8 | Endothelial |
| Dynlt1c   | 0.29 | 0.00 | 0.00 | 0.42 | 0.26 | 8 | Endothelial |
| Rab2a     | 0.26 | 0.00 | 0.00 | 0.42 | 0.27 | 8 | Endothelial |
| Capns1    | 0.26 | 0.00 | 0.00 | 0.39 | 0.24 | 8 | Endothelial |
| Cox7a2l   | 0.27 | 0.00 | 0.00 | 0.57 | 0.41 | 8 | Endothelial |
| Smap1     | 0.27 | 0.00 | 0.00 | 0.34 | 0.20 | 8 | Endothelial |
| Ccar1     | 0.32 | 0.00 | 0.00 | 0.47 | 0.32 | 8 | Endothelial |
| Bnip3l    | 0.25 | 0.00 | 0.00 | 0.53 | 0.37 | 8 | Endothelial |
| Wbp4      | 0.28 | 0.00 | 0.00 | 0.38 | 0.24 | 8 | Endothelial |
| Arid4a    | 0.29 | 0.00 | 0.00 | 0.44 | 0.29 | 8 | Endothelial |
| Ube2d3    | 0.28 | 0.00 | 0.00 | 0.47 | 0.32 | 8 | Endothelial |
| Ik        | 0.25 | 0.00 | 0.00 | 0.51 | 0.35 | 8 | Endothelial |
| Zcrb1     | 0.26 | 0.00 | 0.00 | 0.43 | 0.29 | 8 | Endothelial |
| Eci2      | 0.25 | 0.00 | 0.00 | 0.28 | 0.17 | 8 | Endothelial |
| Apc       | 0.25 | 0.00 | 0.00 | 0.36 | 0.23 | 8 | Endothelial |
| Anapc16   | 0.26 | 0.00 | 0.00 | 0.29 | 0.18 | 8 | Endothelial |
| Rbbp6     | 0.28 | 0.00 | 0.00 | 0.50 | 0.35 | 8 | Endothelial |
| Ppig      | 0.27 | 0.00 | 0.00 | 0.53 | 0.39 | 8 | Endothelial |
| Dlk1      | 2.26 | 0.00 | 0.00 | 0.80 | 0.04 | 9 | AT2 Cell    |
| Meg3      | 2.23 | 0.00 | 0.00 | 0.95 | 0.19 | 9 | AT2 Cell    |
| Slc34a2   | 2.15 | 0.00 | 0.00 | 0.97 | 0.13 | 9 | AT2 Cell    |
| Atp1b1    | 2.08 | 0.00 | 0.00 | 0.95 | 0.16 | 9 | AT2 Cell    |
| Sftpd     | 2.06 | 0.00 | 0.00 | 0.98 | 0.14 | 9 | AT2 Cell    |
| Ctsh      | 2.05 | 0.00 | 0.00 | 0.98 | 0.18 | 9 | AT2 Cell    |
| Rgcc      | 1.96 | 0.00 | 0.00 | 0.86 | 0.15 | 9 | AT2 Cell    |
| Napsa     | 1.91 | 0.00 | 0.00 | 0.98 | 0.17 | 9 | AT2 Cell    |
| Bex4      | 1.87 | 0.00 | 0.00 | 0.89 | 0.10 | 9 | AT2 Cell    |
| Sftpb     | 1.82 | 0.00 | 0.00 | 0.99 | 0.15 | 9 | AT2 Cell    |
| Npc2      | 1.82 | 0.00 | 0.00 | 1.00 | 0.53 | 9 | AT2 Cell    |
| S100g     | 1.80 | 0.00 | 0.00 | 0.85 | 0.10 | 9 | AT2 Cell    |
| Pmvk      | 1.77 | 0.00 | 0.00 | 0.67 | 0.07 | 9 | AT2 Cell    |
| Sftpc     | 1.65 | 0.00 | 0.00 | 1.00 | 0.62 | 9 | AT2 Cell    |
| Errfi1    | 1.63 | 0.00 | 0.00 | 0.79 | 0.07 | 9 | AT2 Cell    |
| Sftpa1    | 1.62 | 0.00 | 0.00 | 0.99 | 0.19 | 9 | AT2 Cell    |
| Lpcat1    | 1.62 | 0.00 | 0.00 | 0.93 | 0.15 | 9 | AT2 Cell    |
| Sfta2     | 1.58 | 0.00 | 0.00 | 0.94 | 0.13 | 9 | AT2 Cell    |
| Cldn3     | 1.57 | 0.00 | 0.00 | 0.87 | 0.09 | 9 | AT2 Cell    |
| Mt1       | 1.53 | 0.00 | 0.00 | 0.80 | 0.13 | 9 | AT2 Cell    |
| Lpin2     | 1.50 | 0.00 | 0.00 | 0.80 | 0.13 | 9 | AT2 Cell    |

|           |      |      |      |      |      |   |          |
|-----------|------|------|------|------|------|---|----------|
| Spink5    | 1.46 | 0.00 | 0.00 | 0.64 | 0.06 | 9 | AT2 Cell |
| Selenbp1  | 1.45 | 0.00 | 0.00 | 0.86 | 0.20 | 9 | AT2 Cell |
| Bex1      | 1.44 | 0.00 | 0.00 | 0.78 | 0.08 | 9 | AT2 Cell |
| Dcxr      | 1.39 | 0.00 | 0.00 | 0.77 | 0.08 | 9 | AT2 Cell |
| Cxcl15    | 1.38 | 0.00 | 0.00 | 0.91 | 0.12 | 9 | AT2 Cell |
| Prdx6     | 1.35 | 0.00 | 0.00 | 0.87 | 0.25 | 9 | AT2 Cell |
| Lmo7      | 1.35 | 0.00 | 0.00 | 0.75 | 0.11 | 9 | AT2 Cell |
| Scd2      | 1.34 | 0.00 | 0.00 | 0.85 | 0.19 | 9 | AT2 Cell |
| Dram1     | 1.32 | 0.00 | 0.00 | 0.82 | 0.09 | 9 | AT2 Cell |
| Selenbp2  | 1.30 | 0.00 | 0.00 | 0.79 | 0.15 | 9 | AT2 Cell |
| Alcam     | 1.26 | 0.00 | 0.00 | 0.92 | 0.20 | 9 | AT2 Cell |
| Mt2       | 1.24 | 0.00 | 0.00 | 0.57 | 0.05 | 9 | AT2 Cell |
| Wfdc2     | 1.21 | 0.00 | 0.00 | 0.88 | 0.14 | 9 | AT2 Cell |
| Fabp5     | 1.20 | 0.00 | 0.00 | 0.70 | 0.11 | 9 | AT2 Cell |
| Gprc5a    | 1.19 | 0.00 | 0.00 | 0.66 | 0.05 | 9 | AT2 Cell |
| Pi4k2b    | 1.18 | 0.00 | 0.00 | 0.70 | 0.08 | 9 | AT2 Cell |
| Tinagl1   | 1.18 | 0.00 | 0.00 | 0.67 | 0.09 | 9 | AT2 Cell |
| Scnn1a    | 1.17 | 0.00 | 0.00 | 0.64 | 0.05 | 9 | AT2 Cell |
| Ager      | 1.16 | 0.00 | 0.00 | 0.85 | 0.15 | 9 | AT2 Cell |
| Cbr2      | 1.14 | 0.00 | 0.00 | 0.79 | 0.14 | 9 | AT2 Cell |
| Cldn18    | 1.13 | 0.00 | 0.00 | 0.90 | 0.15 | 9 | AT2 Cell |
| Mettl7a1  | 1.13 | 0.00 | 0.00 | 0.82 | 0.20 | 9 | AT2 Cell |
| Serpinb6b | 1.12 | 0.00 | 0.00 | 0.71 | 0.15 | 9 | AT2 Cell |
| Myh14     | 1.12 | 0.00 | 0.00 | 0.64 | 0.08 | 9 | AT2 Cell |
| Chchd10   | 1.11 | 0.00 | 0.00 | 0.78 | 0.11 | 9 | AT2 Cell |
| Lgi3      | 1.10 | 0.00 | 0.00 | 0.66 | 0.06 | 9 | AT2 Cell |
| Tfcp2l1   | 1.08 | 0.00 | 0.00 | 0.53 | 0.02 | 9 | AT2 Cell |
| H2afj     | 1.08 | 0.00 | 0.00 | 0.87 | 0.30 | 9 | AT2 Cell |
| Nkx2-1    | 1.07 | 0.00 | 0.00 | 0.70 | 0.08 | 9 | AT2 Cell |
| Swt1      | 1.07 | 0.00 | 0.00 | 0.72 | 0.14 | 9 | AT2 Cell |
| Ptprf     | 1.06 | 0.00 | 0.00 | 0.76 | 0.14 | 9 | AT2 Cell |
| Irx1      | 1.05 | 0.00 | 0.00 | 0.57 | 0.03 | 9 | AT2 Cell |
| Tmem243   | 1.04 | 0.00 | 0.00 | 0.61 | 0.06 | 9 | AT2 Cell |
| Exosc7    | 1.04 | 0.00 | 0.00 | 0.67 | 0.11 | 9 | AT2 Cell |
| Slc12a2   | 1.03 | 0.00 | 0.00 | 0.71 | 0.13 | 9 | AT2 Cell |
| Hc        | 1.03 | 0.00 | 0.00 | 0.78 | 0.09 | 9 | AT2 Cell |
| Gde1      | 1.02 | 0.00 | 0.00 | 0.72 | 0.13 | 9 | AT2 Cell |
| Myo5c     | 1.02 | 0.00 | 0.00 | 0.60 | 0.06 | 9 | AT2 Cell |
| Timp3     | 1.01 | 0.00 | 0.00 | 0.84 | 0.34 | 9 | AT2 Cell |
| Rnase4    | 1.01 | 0.00 | 0.00 | 0.75 | 0.16 | 9 | AT2 Cell |
| Vamp8     | 1.00 | 0.00 | 0.00 | 0.89 | 0.33 | 9 | AT2 Cell |
| Hopx      | 1.00 | 0.00 | 0.00 | 0.57 | 0.09 | 9 | AT2 Cell |
| Abcd3     | 1.00 | 0.00 | 0.00 | 0.75 | 0.17 | 9 | AT2 Cell |

|               |      |      |      |      |      |   |          |
|---------------|------|------|------|------|------|---|----------|
| Clic3         | 0.99 | 0.00 | 0.00 | 0.64 | 0.07 | 9 | AT2 Cell |
| Chka          | 0.99 | 0.00 | 0.00 | 0.61 | 0.09 | 9 | AT2 Cell |
| Sdc1          | 0.99 | 0.00 | 0.00 | 0.70 | 0.10 | 9 | AT2 Cell |
| Scd1          | 0.99 | 0.00 | 0.00 | 0.59 | 0.07 | 9 | AT2 Cell |
| Slc15a2       | 0.98 | 0.00 | 0.00 | 0.56 | 0.04 | 9 | AT2 Cell |
| Epcam         | 0.97 | 0.00 | 0.00 | 0.66 | 0.08 | 9 | AT2 Cell |
| Krt18         | 0.97 | 0.00 | 0.00 | 0.59 | 0.06 | 9 | AT2 Cell |
| Bend7         | 0.97 | 0.00 | 0.00 | 0.57 | 0.05 | 9 | AT2 Cell |
| Herpud1       | 0.97 | 0.00 | 0.00 | 0.60 | 0.12 | 9 | AT2 Cell |
| Taok3         | 0.96 | 0.00 | 0.00 | 0.73 | 0.17 | 9 | AT2 Cell |
| Atp6v0a4      | 0.96 | 0.00 | 0.00 | 0.43 | 0.01 | 9 | AT2 Cell |
| Akap5         | 0.96 | 0.00 | 0.00 | 0.56 | 0.08 | 9 | AT2 Cell |
| Mettl7a2      | 0.94 | 0.00 | 0.00 | 0.61 | 0.09 | 9 | AT2 Cell |
| Eif4h         | 0.93 | 0.00 | 0.00 | 0.76 | 0.25 | 9 | AT2 Cell |
| Insig1        | 0.92 | 0.00 | 0.00 | 0.51 | 0.06 | 9 | AT2 Cell |
| Sdc4          | 0.92 | 0.00 | 0.00 | 0.83 | 0.21 | 9 | AT2 Cell |
| Krt8          | 0.91 | 0.00 | 0.00 | 0.57 | 0.06 | 9 | AT2 Cell |
| Zdhhc3        | 0.91 | 0.00 | 0.00 | 0.69 | 0.14 | 9 | AT2 Cell |
| Krt7          | 0.91 | 0.00 | 0.00 | 0.56 | 0.06 | 9 | AT2 Cell |
| 1500012F01Rik | 0.91 | 0.00 | 0.00 | 0.80 | 0.28 | 9 | AT2 Cell |
| Ces1d         | 0.90 | 0.00 | 0.00 | 0.77 | 0.15 | 9 | AT2 Cell |
| Mgst1         | 0.90 | 0.00 | 0.00 | 0.79 | 0.18 | 9 | AT2 Cell |
| Npc1          | 0.88 | 0.00 | 0.00 | 0.56 | 0.07 | 9 | AT2 Cell |
| Cystm1        | 0.87 | 0.00 | 0.00 | 0.56 | 0.06 | 9 | AT2 Cell |
| Icam1         | 0.86 | 0.00 | 0.00 | 0.57 | 0.08 | 9 | AT2 Cell |
| Aqp5          | 0.86 | 0.00 | 0.00 | 0.46 | 0.05 | 9 | AT2 Cell |
| Socs2         | 0.86 | 0.00 | 0.00 | 0.83 | 0.32 | 9 | AT2 Cell |
| 8430408G22Rik | 0.85 | 0.00 | 0.00 | 0.42 | 0.03 | 9 | AT2 Cell |
| Muc1          | 0.85 | 0.00 | 0.00 | 0.59 | 0.07 | 9 | AT2 Cell |
| Cebpa         | 0.85 | 0.00 | 0.00 | 0.48 | 0.04 | 9 | AT2 Cell |
| Ank3          | 0.85 | 0.00 | 0.00 | 0.55 | 0.06 | 9 | AT2 Cell |
| Ptp4a1        | 0.84 | 0.00 | 0.00 | 0.54 | 0.09 | 9 | AT2 Cell |
| Pip5k1b       | 0.83 | 0.00 | 0.00 | 0.44 | 0.02 | 9 | AT2 Cell |
| Ccz1          | 0.83 | 0.00 | 0.00 | 0.61 | 0.11 | 9 | AT2 Cell |
| Ppp1r14c      | 0.83 | 0.00 | 0.00 | 0.67 | 0.09 | 9 | AT2 Cell |
| Mid1ip1       | 0.83 | 0.00 | 0.00 | 0.59 | 0.13 | 9 | AT2 Cell |
| Cstb          | 0.83 | 0.00 | 0.00 | 0.78 | 0.26 | 9 | AT2 Cell |
| Tspan2        | 0.83 | 0.00 | 0.00 | 0.59 | 0.11 | 9 | AT2 Cell |
| Rps19         | 0.82 | 0.00 | 0.00 | 0.99 | 0.82 | 9 | AT2 Cell |
| 2200002D01Rik | 0.82 | 0.00 | 0.00 | 0.47 | 0.06 | 9 | AT2 Cell |
| Npnt          | 0.81 | 0.00 | 0.00 | 0.87 | 0.22 | 9 | AT2 Cell |
| Egfl6         | 0.81 | 0.00 | 0.00 | 0.59 | 0.07 | 9 | AT2 Cell |
| Gadd45g       | 0.81 | 0.00 | 0.00 | 0.45 | 0.07 | 9 | AT2 Cell |

|               |      |      |      |      |      |   |          |
|---------------|------|------|------|------|------|---|----------|
| Rai14         | 0.81 | 0.00 | 0.00 | 0.57 | 0.09 | 9 | AT2 Cell |
| Acot1         | 0.80 | 0.00 | 0.00 | 0.52 | 0.06 | 9 | AT2 Cell |
| Secisbp2l     | 0.80 | 0.00 | 0.00 | 0.66 | 0.16 | 9 | AT2 Cell |
| Irx3          | 0.79 | 0.00 | 0.00 | 0.52 | 0.06 | 9 | AT2 Cell |
| D230025D16Rik | 0.79 | 0.00 | 0.00 | 0.52 | 0.06 | 9 | AT2 Cell |
| Gclc          | 0.79 | 0.00 | 0.00 | 0.47 | 0.07 | 9 | AT2 Cell |
| Abca3         | 0.78 | 0.00 | 0.00 | 0.63 | 0.10 | 9 | AT2 Cell |
| Cldn7         | 0.78 | 0.00 | 0.00 | 0.55 | 0.06 | 9 | AT2 Cell |
| Brd7          | 0.76 | 0.00 | 0.00 | 0.74 | 0.24 | 9 | AT2 Cell |
| Spint2        | 0.76 | 0.00 | 0.00 | 0.60 | 0.10 | 9 | AT2 Cell |
| Lamp3         | 0.76 | 0.00 | 0.00 | 0.67 | 0.10 | 9 | AT2 Cell |
| Ctsc          | 0.76 | 0.00 | 0.00 | 0.72 | 0.18 | 9 | AT2 Cell |
| Etv5          | 0.76 | 0.00 | 0.00 | 0.48 | 0.05 | 9 | AT2 Cell |
| Ezr           | 0.75 | 0.00 | 0.00 | 0.76 | 0.20 | 9 | AT2 Cell |
| Bex2          | 0.75 | 0.00 | 0.00 | 0.53 | 0.09 | 9 | AT2 Cell |
| Tmem213       | 0.74 | 0.00 | 0.00 | 0.36 | 0.02 | 9 | AT2 Cell |
| Ndnf          | 0.74 | 0.00 | 0.00 | 0.41 | 0.04 | 9 | AT2 Cell |
| Wdr45         | 0.74 | 0.00 | 0.00 | 0.49 | 0.07 | 9 | AT2 Cell |
| Emp2          | 0.73 | 0.00 | 0.00 | 0.84 | 0.33 | 9 | AT2 Cell |
| Col4a3        | 0.73 | 0.00 | 0.00 | 0.42 | 0.04 | 9 | AT2 Cell |
| Kcnj15        | 0.73 | 0.00 | 0.00 | 0.41 | 0.03 | 9 | AT2 Cell |
| Bri3          | 0.73 | 0.00 | 0.00 | 0.69 | 0.19 | 9 | AT2 Cell |
| Krt19         | 0.72 | 0.00 | 0.00 | 0.46 | 0.05 | 9 | AT2 Cell |
| Malat1        | 0.72 | 0.00 | 0.00 | 1.00 | 1.00 | 9 | AT2 Cell |
| Wwc1          | 0.72 | 0.00 | 0.00 | 0.45 | 0.05 | 9 | AT2 Cell |
| Pcnt          | 0.72 | 0.00 | 0.00 | 0.55 | 0.13 | 9 | AT2 Cell |
| Fasn          | 0.72 | 0.00 | 0.00 | 0.48 | 0.06 | 9 | AT2 Cell |
| Uhrf1bp1l     | 0.71 | 0.00 | 0.00 | 0.51 | 0.08 | 9 | AT2 Cell |
| Mbip          | 0.71 | 0.00 | 0.00 | 0.55 | 0.10 | 9 | AT2 Cell |
| Tmem245       | 0.70 | 0.00 | 0.00 | 0.53 | 0.09 | 9 | AT2 Cell |
| Prdx6b        | 0.70 | 0.00 | 0.00 | 0.43 | 0.05 | 9 | AT2 Cell |
| Pde7a         | 0.69 | 0.00 | 0.00 | 0.45 | 0.06 | 9 | AT2 Cell |
| Atp8a1        | 0.69 | 0.00 | 0.00 | 0.62 | 0.14 | 9 | AT2 Cell |
| Cdkn2b        | 0.68 | 0.00 | 0.00 | 0.41 | 0.04 | 9 | AT2 Cell |
| Gas6          | 0.68 | 0.00 | 0.00 | 0.60 | 0.13 | 9 | AT2 Cell |
| Acsl4         | 0.68 | 0.00 | 0.00 | 0.53 | 0.10 | 9 | AT2 Cell |
| Irx2          | 0.68 | 0.00 | 0.00 | 0.40 | 0.03 | 9 | AT2 Cell |
| AA986860      | 0.68 | 0.00 | 0.00 | 0.37 | 0.02 | 9 | AT2 Cell |
| Gramd2        | 0.68 | 0.00 | 0.00 | 0.40 | 0.04 | 9 | AT2 Cell |
| Rtkn2         | 0.66 | 0.00 | 0.00 | 0.37 | 0.05 | 9 | AT2 Cell |
| Msln          | 0.66 | 0.00 | 0.00 | 0.33 | 0.04 | 9 | AT2 Cell |
| Fgfr2         | 0.66 | 0.00 | 0.00 | 0.44 | 0.06 | 9 | AT2 Cell |
| Ppp1r9a       | 0.66 | 0.00 | 0.00 | 0.56 | 0.13 | 9 | AT2 Cell |

|          |      |      |      |      |      |   |          |
|----------|------|------|------|------|------|---|----------|
| Fdx1     | 0.66 | 0.00 | 0.00 | 0.55 | 0.13 | 9 | AT2 Cell |
| Tmem63b  | 0.65 | 0.00 | 0.00 | 0.44 | 0.05 | 9 | AT2 Cell |
| Fam189a2 | 0.65 | 0.00 | 0.00 | 0.37 | 0.03 | 9 | AT2 Cell |
| Slc39a8  | 0.65 | 0.00 | 0.00 | 0.44 | 0.06 | 9 | AT2 Cell |
| Prss8    | 0.65 | 0.00 | 0.00 | 0.38 | 0.03 | 9 | AT2 Cell |
| S100a14  | 0.65 | 0.00 | 0.00 | 0.33 | 0.03 | 9 | AT2 Cell |
| Elf5     | 0.65 | 0.00 | 0.00 | 0.34 | 0.02 | 9 | AT2 Cell |
| Gm26809  | 0.65 | 0.00 | 0.00 | 0.33 | 0.04 | 9 | AT2 Cell |
| Gm12840  | 0.64 | 0.00 | 0.00 | 0.38 | 0.06 | 9 | AT2 Cell |
| Rbm47    | 0.64 | 0.00 | 0.00 | 0.40 | 0.04 | 9 | AT2 Cell |
| Kcnc3    | 0.64 | 0.00 | 0.00 | 0.35 | 0.02 | 9 | AT2 Cell |
| Pim3     | 0.64 | 0.00 | 0.00 | 0.44 | 0.06 | 9 | AT2 Cell |
| C77080   | 0.63 | 0.00 | 0.00 | 0.37 | 0.03 | 9 | AT2 Cell |
| C77370   | 0.62 | 0.00 | 0.00 | 0.31 | 0.02 | 9 | AT2 Cell |
| Pla2g1b  | 0.62 | 0.00 | 0.00 | 0.39 | 0.04 | 9 | AT2 Cell |
| F3       | 0.62 | 0.00 | 0.00 | 0.35 | 0.04 | 9 | AT2 Cell |
| Mal2     | 0.62 | 0.00 | 0.00 | 0.43 | 0.05 | 9 | AT2 Cell |
| Atp13a3  | 0.61 | 0.00 | 0.00 | 0.48 | 0.08 | 9 | AT2 Cell |
| Rasl11a  | 0.61 | 0.00 | 0.00 | 0.35 | 0.05 | 9 | AT2 Cell |
| Sik1     | 0.61 | 0.00 | 0.00 | 0.35 | 0.03 | 9 | AT2 Cell |
| Scnn1g   | 0.61 | 0.00 | 0.00 | 0.33 | 0.03 | 9 | AT2 Cell |
| Btg3     | 0.61 | 0.00 | 0.00 | 0.50 | 0.10 | 9 | AT2 Cell |
| Lamc2    | 0.60 | 0.00 | 0.00 | 0.38 | 0.03 | 9 | AT2 Cell |
| Tspan8   | 0.60 | 0.00 | 0.00 | 0.54 | 0.11 | 9 | AT2 Cell |
| Tspan11  | 0.60 | 0.00 | 0.00 | 0.34 | 0.03 | 9 | AT2 Cell |
| Ppl      | 0.60 | 0.00 | 0.00 | 0.35 | 0.03 | 9 | AT2 Cell |
| Mal      | 0.60 | 0.00 | 0.00 | 0.37 | 0.04 | 9 | AT2 Cell |
| Prr15l   | 0.60 | 0.00 | 0.00 | 0.41 | 0.05 | 9 | AT2 Cell |
| Tmem37   | 0.60 | 0.00 | 0.00 | 0.34 | 0.04 | 9 | AT2 Cell |
| Gm7334   | 0.59 | 0.00 | 0.00 | 0.50 | 0.10 | 9 | AT2 Cell |
| Nedd4l   | 0.59 | 0.00 | 0.00 | 0.37 | 0.04 | 9 | AT2 Cell |
| Ccdc68   | 0.59 | 0.00 | 0.00 | 0.37 | 0.04 | 9 | AT2 Cell |
| Atp6v1c2 | 0.59 | 0.00 | 0.00 | 0.37 | 0.04 | 9 | AT2 Cell |
| Crb3     | 0.59 | 0.00 | 0.00 | 0.36 | 0.03 | 9 | AT2 Cell |
| Cmtm8    | 0.59 | 0.00 | 0.00 | 0.52 | 0.11 | 9 | AT2 Cell |
| Ccdc141  | 0.59 | 0.00 | 0.00 | 0.46 | 0.09 | 9 | AT2 Cell |
| Prkci    | 0.59 | 0.00 | 0.00 | 0.52 | 0.12 | 9 | AT2 Cell |
| Txlng    | 0.59 | 0.00 | 0.00 | 0.42 | 0.08 | 9 | AT2 Cell |
| Eps8l2   | 0.57 | 0.00 | 0.00 | 0.33 | 0.03 | 9 | AT2 Cell |
| Llg12    | 0.57 | 0.00 | 0.00 | 0.35 | 0.03 | 9 | AT2 Cell |
| Kcnk1    | 0.57 | 0.00 | 0.00 | 0.32 | 0.02 | 9 | AT2 Cell |
| Avpi1    | 0.57 | 0.00 | 0.00 | 0.44 | 0.08 | 9 | AT2 Cell |
| Cdh1     | 0.56 | 0.00 | 0.00 | 0.44 | 0.07 | 9 | AT2 Cell |

|           |      |      |      |      |      |   |          |
|-----------|------|------|------|------|------|---|----------|
| Rbpjl     | 0.56 | 0.00 | 0.00 | 0.38 | 0.05 | 9 | AT2 Cell |
| Wwp1      | 0.56 | 0.00 | 0.00 | 0.53 | 0.12 | 9 | AT2 Cell |
| Matn4     | 0.55 | 0.00 | 0.00 | 0.33 | 0.03 | 9 | AT2 Cell |
| Pfkfb2    | 0.55 | 0.00 | 0.00 | 0.37 | 0.05 | 9 | AT2 Cell |
| Slc1a5    | 0.55 | 0.00 | 0.00 | 0.48 | 0.10 | 9 | AT2 Cell |
| Col4a4    | 0.55 | 0.00 | 0.00 | 0.36 | 0.03 | 9 | AT2 Cell |
| Srebf1    | 0.55 | 0.00 | 0.00 | 0.36 | 0.05 | 9 | AT2 Cell |
| Erb3      | 0.54 | 0.00 | 0.00 | 0.32 | 0.02 | 9 | AT2 Cell |
| Acot2     | 0.53 | 0.00 | 0.00 | 0.37 | 0.05 | 9 | AT2 Cell |
| Traf1     | 0.52 | 0.00 | 0.00 | 0.34 | 0.03 | 9 | AT2 Cell |
| Nrbp2     | 0.52 | 0.00 | 0.00 | 0.35 | 0.05 | 9 | AT2 Cell |
| Arg2      | 0.52 | 0.00 | 0.00 | 0.26 | 0.01 | 9 | AT2 Cell |
| Mthfd1    | 0.51 | 0.00 | 0.00 | 0.41 | 0.07 | 9 | AT2 Cell |
| Rian      | 0.51 | 0.00 | 0.00 | 0.31 | 0.03 | 9 | AT2 Cell |
| Ano1      | 0.51 | 0.00 | 0.00 | 0.34 | 0.04 | 9 | AT2 Cell |
| Dhrs3     | 0.51 | 0.00 | 0.00 | 0.37 | 0.06 | 9 | AT2 Cell |
| Rab11fip1 | 0.50 | 0.00 | 0.00 | 0.34 | 0.04 | 9 | AT2 Cell |
| Slc6a14   | 0.50 | 0.00 | 0.00 | 0.28 | 0.03 | 9 | AT2 Cell |
| Flcn      | 0.49 | 0.00 | 0.00 | 0.34 | 0.04 | 9 | AT2 Cell |
| Mir22hg   | 0.48 | 0.00 | 0.00 | 0.35 | 0.06 | 9 | AT2 Cell |
| Spock2    | 0.48 | 0.00 | 0.00 | 0.30 | 0.04 | 9 | AT2 Cell |
| Tspan1    | 0.48 | 0.00 | 0.00 | 0.31 | 0.03 | 9 | AT2 Cell |
| Pnpla2    | 0.48 | 0.00 | 0.00 | 0.38 | 0.06 | 9 | AT2 Cell |
| Hk2       | 0.48 | 0.00 | 0.00 | 0.33 | 0.04 | 9 | AT2 Cell |
| Foxa2     | 0.47 | 0.00 | 0.00 | 0.31 | 0.04 | 9 | AT2 Cell |
| Gja1      | 0.47 | 0.00 | 0.00 | 0.45 | 0.08 | 9 | AT2 Cell |
| Snx25     | 0.47 | 0.00 | 0.00 | 0.35 | 0.05 | 9 | AT2 Cell |
| Ralgapa2  | 0.47 | 0.00 | 0.00 | 0.31 | 0.04 | 9 | AT2 Cell |
| Foxo3     | 0.47 | 0.00 | 0.00 | 0.36 | 0.06 | 9 | AT2 Cell |
| Per1      | 0.46 | 0.00 | 0.00 | 0.31 | 0.04 | 9 | AT2 Cell |
| Pgs1      | 0.46 | 0.00 | 0.00 | 0.38 | 0.06 | 9 | AT2 Cell |
| Fam129b   | 0.46 | 0.00 | 0.00 | 0.39 | 0.07 | 9 | AT2 Cell |
| Slc43a2   | 0.46 | 0.00 | 0.00 | 0.34 | 0.05 | 9 | AT2 Cell |
| Klf15     | 0.46 | 0.00 | 0.00 | 0.28 | 0.02 | 9 | AT2 Cell |
| Bnip3     | 0.45 | 0.00 | 0.00 | 0.41 | 0.08 | 9 | AT2 Cell |
| Ldlr      | 0.45 | 0.00 | 0.00 | 0.30 | 0.04 | 9 | AT2 Cell |
| Pard6b    | 0.45 | 0.00 | 0.00 | 0.26 | 0.02 | 9 | AT2 Cell |
| Arhgap44  | 0.45 | 0.00 | 0.00 | 0.27 | 0.02 | 9 | AT2 Cell |
| Sh3d21    | 0.44 | 0.00 | 0.00 | 0.27 | 0.03 | 9 | AT2 Cell |
| Perp      | 0.44 | 0.00 | 0.00 | 0.27 | 0.02 | 9 | AT2 Cell |
| Mapkapk2  | 0.44 | 0.00 | 0.00 | 0.33 | 0.05 | 9 | AT2 Cell |
| Pvrl2     | 0.44 | 0.00 | 0.00 | 0.32 | 0.04 | 9 | AT2 Cell |
| Baiap2l1  | 0.44 | 0.00 | 0.00 | 0.28 | 0.03 | 9 | AT2 Cell |

|            |      |      |      |      |      |   |          |
|------------|------|------|------|------|------|---|----------|
| Epb4.1l5   | 0.43 | 0.00 | 0.00 | 0.29 | 0.03 | 9 | AT2 Cell |
| Cxadr      | 0.43 | 0.00 | 0.00 | 0.33 | 0.05 | 9 | AT2 Cell |
| Spry2      | 0.42 | 0.00 | 0.00 | 0.31 | 0.05 | 9 | AT2 Cell |
| Arhgef28   | 0.42 | 0.00 | 0.00 | 0.26 | 0.03 | 9 | AT2 Cell |
| Cds1       | 0.42 | 0.00 | 0.00 | 0.26 | 0.02 | 9 | AT2 Cell |
| Nceh1      | 0.42 | 0.00 | 0.00 | 0.34 | 0.06 | 9 | AT2 Cell |
| Igf2bp2    | 0.42 | 0.00 | 0.00 | 0.29 | 0.03 | 9 | AT2 Cell |
| Slc26a9    | 0.42 | 0.00 | 0.00 | 0.25 | 0.02 | 9 | AT2 Cell |
| Klf5       | 0.41 | 0.00 | 0.00 | 0.27 | 0.02 | 9 | AT2 Cell |
| Cdc25b     | 0.41 | 0.00 | 0.00 | 0.28 | 0.04 | 9 | AT2 Cell |
| Map7       | 0.41 | 0.00 | 0.00 | 0.30 | 0.04 | 9 | AT2 Cell |
| Rasgef1b   | 0.41 | 0.00 | 0.00 | 0.27 | 0.02 | 9 | AT2 Cell |
| Vsig2      | 0.41 | 0.00 | 0.00 | 0.26 | 0.03 | 9 | AT2 Cell |
| Pkp2       | 0.40 | 0.00 | 0.00 | 0.27 | 0.03 | 9 | AT2 Cell |
| Igfbp6     | 0.39 | 0.00 | 0.00 | 0.26 | 0.03 | 9 | AT2 Cell |
| Pgm2       | 0.39 | 0.00 | 0.00 | 0.27 | 0.03 | 9 | AT2 Cell |
| Mpv17l2    | 0.39 | 0.00 | 0.00 | 0.29 | 0.04 | 9 | AT2 Cell |
| Flrt3      | 0.38 | 0.00 | 0.00 | 0.27 | 0.03 | 9 | AT2 Cell |
| Lamb3      | 0.38 | 0.00 | 0.00 | 0.26 | 0.03 | 9 | AT2 Cell |
| Tc2n       | 0.38 | 0.00 | 0.00 | 0.26 | 0.03 | 9 | AT2 Cell |
| Tmc4       | 0.38 | 0.00 | 0.00 | 0.26 | 0.03 | 9 | AT2 Cell |
| Sec14l3    | 0.29 | 0.00 | 0.00 | 0.50 | 0.10 | 9 | AT2 Cell |
| Cadm1      | 0.55 | 0.00 | 0.00 | 0.54 | 0.13 | 9 | AT2 Cell |
| Il18r1     | 0.44 | 0.00 | 0.00 | 0.35 | 0.06 | 9 | AT2 Cell |
| Siva1      | 0.59 | 0.00 | 0.00 | 0.54 | 0.13 | 9 | AT2 Cell |
| Ypel5      | 0.53 | 0.00 | 0.00 | 0.46 | 0.10 | 9 | AT2 Cell |
| Wbp5       | 0.81 | 0.00 | 0.00 | 0.94 | 0.46 | 9 | AT2 Cell |
| Fdps       | 0.42 | 0.00 | 0.00 | 0.31 | 0.05 | 9 | AT2 Cell |
| Gpx4       | 0.81 | 0.00 | 0.00 | 0.86 | 0.36 | 9 | AT2 Cell |
| Col23a1    | 0.45 | 0.00 | 0.00 | 0.28 | 0.04 | 9 | AT2 Cell |
| Spry1      | 0.46 | 0.00 | 0.00 | 0.35 | 0.06 | 9 | AT2 Cell |
| St6galnac2 | 0.39 | 0.00 | 0.00 | 0.30 | 0.05 | 9 | AT2 Cell |
| Vapa       | 0.70 | 0.00 | 0.00 | 0.67 | 0.21 | 9 | AT2 Cell |
| Rpl21      | 0.71 | 0.00 | 0.00 | 0.97 | 0.74 | 9 | AT2 Cell |
| Atp6v0a1   | 0.45 | 0.00 | 0.00 | 0.34 | 0.06 | 9 | AT2 Cell |
| Tef        | 0.46 | 0.00 | 0.00 | 0.35 | 0.07 | 9 | AT2 Cell |
| Dnase2a    | 0.42 | 0.00 | 0.00 | 0.31 | 0.05 | 9 | AT2 Cell |
| Lzts2      | 0.50 | 0.00 | 0.00 | 0.42 | 0.09 | 9 | AT2 Cell |
| Arl6ip1    | 0.82 | 0.00 | 0.00 | 0.93 | 0.51 | 9 | AT2 Cell |
| Plp2       | 0.50 | 0.00 | 0.00 | 0.49 | 0.12 | 9 | AT2 Cell |
| Pdpm       | 0.42 | 0.00 | 0.00 | 0.28 | 0.04 | 9 | AT2 Cell |
| P4ha1      | 0.51 | 0.00 | 0.00 | 0.38 | 0.08 | 9 | AT2 Cell |
| Pdgfa      | 0.50 | 0.00 | 0.00 | 0.43 | 0.09 | 9 | AT2 Cell |

|           |      |      |      |      |      |   |          |
|-----------|------|------|------|------|------|---|----------|
| Plxna2    | 0.39 | 0.00 | 0.00 | 0.35 | 0.07 | 9 | AT2 Cell |
| Chp1      | 0.51 | 0.00 | 0.00 | 0.51 | 0.13 | 9 | AT2 Cell |
| Mecom     | 0.51 | 0.00 | 0.00 | 0.43 | 0.09 | 9 | AT2 Cell |
| Lrrc16a   | 0.35 | 0.00 | 0.00 | 0.26 | 0.04 | 9 | AT2 Cell |
| Gm6169    | 0.49 | 0.00 | 0.00 | 0.48 | 0.11 | 9 | AT2 Cell |
| Chi3l1    | 0.28 | 0.00 | 0.00 | 0.45 | 0.10 | 9 | AT2 Cell |
| Prpf18    | 0.53 | 0.00 | 0.00 | 0.48 | 0.12 | 9 | AT2 Cell |
| Anxa1     | 0.65 | 0.00 | 0.00 | 0.60 | 0.17 | 9 | AT2 Cell |
| Ldhb      | 0.44 | 0.00 | 0.00 | 0.36 | 0.07 | 9 | AT2 Cell |
| Dpp4      | 0.45 | 0.00 | 0.00 | 0.49 | 0.12 | 9 | AT2 Cell |
| Zfp36     | 0.58 | 0.00 | 0.00 | 0.56 | 0.15 | 9 | AT2 Cell |
| Ppfibp2   | 0.36 | 0.00 | 0.00 | 0.31 | 0.05 | 9 | AT2 Cell |
| Arrdc1    | 0.43 | 0.00 | 0.00 | 0.41 | 0.09 | 9 | AT2 Cell |
| Tmem164   | 0.44 | 0.00 | 0.00 | 0.32 | 0.06 | 9 | AT2 Cell |
| Fos       | 0.67 | 0.00 | 0.00 | 0.59 | 0.18 | 9 | AT2 Cell |
| Neat1     | 0.70 | 0.00 | 0.00 | 0.75 | 0.26 | 9 | AT2 Cell |
| Agpat3    | 0.39 | 0.00 | 0.00 | 0.35 | 0.07 | 9 | AT2 Cell |
| Jund      | 0.67 | 0.00 | 0.00 | 0.73 | 0.26 | 9 | AT2 Cell |
| Emc6      | 0.50 | 0.00 | 0.00 | 0.50 | 0.13 | 9 | AT2 Cell |
| Klf9      | 0.53 | 0.00 | 0.00 | 0.61 | 0.18 | 9 | AT2 Cell |
| Vegfa     | 0.60 | 0.00 | 0.00 | 0.54 | 0.15 | 9 | AT2 Cell |
| Spg21     | 0.46 | 0.00 | 0.00 | 0.35 | 0.07 | 9 | AT2 Cell |
| Srebf2    | 0.36 | 0.00 | 0.00 | 0.27 | 0.05 | 9 | AT2 Cell |
| Gm9847    | 0.52 | 0.00 | 0.00 | 0.53 | 0.15 | 9 | AT2 Cell |
| Anxa3     | 0.57 | 0.00 | 0.00 | 0.65 | 0.21 | 9 | AT2 Cell |
| Slc38a2   | 0.58 | 0.00 | 0.00 | 0.59 | 0.18 | 9 | AT2 Cell |
| Tacc2     | 0.41 | 0.00 | 0.00 | 0.34 | 0.07 | 9 | AT2 Cell |
| Tpt1      | 0.57 | 0.00 | 0.00 | 0.99 | 0.87 | 9 | AT2 Cell |
| Eif3b     | 0.46 | 0.00 | 0.00 | 0.44 | 0.11 | 9 | AT2 Cell |
| Lrrk2     | 0.35 | 0.00 | 0.00 | 0.26 | 0.04 | 9 | AT2 Cell |
| Atp11a    | 0.42 | 0.00 | 0.00 | 0.43 | 0.10 | 9 | AT2 Cell |
| Per3      | 0.33 | 0.00 | 0.00 | 0.26 | 0.04 | 9 | AT2 Cell |
| Dmtf1     | 0.48 | 0.00 | 0.00 | 0.42 | 0.10 | 9 | AT2 Cell |
| Hdgf      | 0.58 | 0.00 | 0.00 | 0.68 | 0.23 | 9 | AT2 Cell |
| Atp6v1g1  | 0.65 | 0.00 | 0.00 | 0.77 | 0.30 | 9 | AT2 Cell |
| Syn3      | 0.58 | 0.00 | 0.00 | 0.51 | 0.15 | 9 | AT2 Cell |
| Iqgap1    | 0.66 | 0.00 | 0.00 | 0.89 | 0.43 | 9 | AT2 Cell |
| Gnas      | 0.65 | 0.00 | 0.00 | 0.96 | 0.66 | 9 | AT2 Cell |
| Wdfy1     | 0.32 | 0.00 | 0.00 | 0.25 | 0.04 | 9 | AT2 Cell |
| Carkd     | 0.46 | 0.00 | 0.00 | 0.51 | 0.15 | 9 | AT2 Cell |
| Rpl21-ps4 | 0.64 | 0.00 | 0.00 | 0.80 | 0.34 | 9 | AT2 Cell |
| Tspan15   | 0.34 | 0.00 | 0.00 | 0.31 | 0.06 | 9 | AT2 Cell |
| Asah1     | 0.41 | 0.00 | 0.00 | 0.44 | 0.11 | 9 | AT2 Cell |

|           |      |      |      |      |      |   |          |
|-----------|------|------|------|------|------|---|----------|
| Tbcel     | 0.34 | 0.00 | 0.00 | 0.30 | 0.06 | 9 | AT2 Cell |
| Gstk1     | 0.41 | 0.00 | 0.00 | 0.32 | 0.07 | 9 | AT2 Cell |
| Senp2     | 0.44 | 0.00 | 0.00 | 0.37 | 0.09 | 9 | AT2 Cell |
| Klhl24    | 0.41 | 0.00 | 0.00 | 0.43 | 0.11 | 9 | AT2 Cell |
| Mpp5      | 0.44 | 0.00 | 0.00 | 0.42 | 0.11 | 9 | AT2 Cell |
| Glrx      | 0.39 | 0.00 | 0.00 | 0.32 | 0.07 | 9 | AT2 Cell |
| Ppa2      | 0.38 | 0.00 | 0.00 | 0.39 | 0.09 | 9 | AT2 Cell |
| Cux1      | 0.47 | 0.00 | 0.00 | 0.52 | 0.15 | 9 | AT2 Cell |
| Tnfrsf12a | 0.38 | 0.00 | 0.00 | 0.27 | 0.05 | 9 | AT2 Cell |
| Nfe2l2    | 0.59 | 0.00 | 0.00 | 0.66 | 0.24 | 9 | AT2 Cell |
| Gata6     | 0.32 | 0.00 | 0.00 | 0.35 | 0.08 | 9 | AT2 Cell |
| Nupr1     | 1.32 | 0.00 | 0.00 | 0.52 | 0.17 | 9 | AT2 Cell |
| Rps8      | 0.55 | 0.00 | 0.00 | 0.98 | 0.81 | 9 | AT2 Cell |
| Gm26384   | 0.65 | 0.00 | 0.00 | 0.88 | 0.47 | 9 | AT2 Cell |
| Agrn      | 0.48 | 0.00 | 0.00 | 0.45 | 0.12 | 9 | AT2 Cell |
| Rpl21-ps6 | 0.67 | 0.00 | 0.00 | 0.85 | 0.42 | 9 | AT2 Cell |
| Cers2     | 0.44 | 0.00 | 0.00 | 0.48 | 0.13 | 9 | AT2 Cell |
| Atp1a1    | 0.46 | 0.00 | 0.00 | 0.48 | 0.14 | 9 | AT2 Cell |
| Irf2bp2   | 0.46 | 0.00 | 0.00 | 0.50 | 0.15 | 9 | AT2 Cell |
| Ifi30     | 0.30 | 0.00 | 0.00 | 0.41 | 0.10 | 9 | AT2 Cell |
| Cited2    | 0.44 | 0.00 | 0.00 | 0.38 | 0.09 | 9 | AT2 Cell |
| Lyz1      | 0.50 | 0.00 | 0.00 | 0.56 | 0.18 | 9 | AT2 Cell |
| Kank2     | 0.37 | 0.00 | 0.00 | 0.41 | 0.11 | 9 | AT2 Cell |
| Stard3    | 0.30 | 0.00 | 0.00 | 0.27 | 0.05 | 9 | AT2 Cell |
| Tanc2     | 0.35 | 0.00 | 0.00 | 0.32 | 0.07 | 9 | AT2 Cell |
| Rps28     | 0.53 | 0.00 | 0.00 | 0.98 | 0.83 | 9 | AT2 Cell |
| Por       | 0.44 | 0.00 | 0.00 | 0.43 | 0.12 | 9 | AT2 Cell |
| Rab27b    | 0.32 | 0.00 | 0.00 | 0.30 | 0.06 | 9 | AT2 Cell |
| Tob1      | 0.31 | 0.00 | 0.00 | 0.28 | 0.06 | 9 | AT2 Cell |
| Lama5     | 0.35 | 0.00 | 0.00 | 0.35 | 0.08 | 9 | AT2 Cell |
| Gm10263   | 0.54 | 0.00 | 0.00 | 0.96 | 0.76 | 9 | AT2 Cell |
| F11r      | 0.40 | 0.00 | 0.00 | 0.51 | 0.15 | 9 | AT2 Cell |
| Bcam      | 0.32 | 0.00 | 0.00 | 0.35 | 0.09 | 9 | AT2 Cell |
| Cpm       | 0.32 | 0.00 | 0.00 | 0.55 | 0.17 | 9 | AT2 Cell |
| Camk2n1   | 0.40 | 0.00 | 0.00 | 0.47 | 0.13 | 9 | AT2 Cell |
| Rnf114    | 0.32 | 0.00 | 0.00 | 0.34 | 0.08 | 9 | AT2 Cell |
| Ptplad1   | 0.33 | 0.00 | 0.00 | 0.35 | 0.08 | 9 | AT2 Cell |
| Ppm1b     | 0.32 | 0.00 | 0.00 | 0.26 | 0.05 | 9 | AT2 Cell |
| Mir682    | 0.47 | 0.00 | 0.00 | 0.98 | 0.85 | 9 | AT2 Cell |
| Ctage5    | 0.53 | 0.00 | 0.00 | 0.69 | 0.27 | 9 | AT2 Cell |
| Cd9       | 0.46 | 0.00 | 0.00 | 0.81 | 0.33 | 9 | AT2 Cell |
| Gm22758   | 0.55 | 0.00 | 0.00 | 0.95 | 0.68 | 9 | AT2 Cell |
| Atp6v1a   | 0.51 | 0.00 | 0.00 | 0.69 | 0.26 | 9 | AT2 Cell |

|                |      |      |      |      |      |   |          |
|----------------|------|------|------|------|------|---|----------|
| Gm22759        | 0.57 | 0.00 | 0.00 | 0.94 | 0.63 | 9 | AT2 Cell |
| Rpl37a         | 0.49 | 0.00 | 0.00 | 0.98 | 0.83 | 9 | AT2 Cell |
| Polr2e         | 0.40 | 0.00 | 0.00 | 0.48 | 0.15 | 9 | AT2 Cell |
| Bmp1           | 0.34 | 0.00 | 0.00 | 0.31 | 0.07 | 9 | AT2 Cell |
| Fam177a        | 0.47 | 0.00 | 0.00 | 0.62 | 0.22 | 9 | AT2 Cell |
| Rps27          | 0.50 | 0.00 | 0.00 | 0.98 | 0.81 | 9 | AT2 Cell |
| Mdfic          | 0.27 | 0.00 | 0.00 | 0.28 | 0.06 | 9 | AT2 Cell |
| Nkd1           | 0.35 | 0.00 | 0.00 | 0.39 | 0.10 | 9 | AT2 Cell |
| Calcoco1       | 0.26 | 0.00 | 0.00 | 0.25 | 0.05 | 9 | AT2 Cell |
| 1700047117Rik2 | 0.39 | 0.00 | 0.00 | 0.54 | 0.18 | 9 | AT2 Cell |
| Gm22761        | 0.42 | 0.00 | 0.00 | 0.51 | 0.16 | 9 | AT2 Cell |
| Anxa4          | 0.32 | 0.00 | 0.00 | 0.35 | 0.09 | 9 | AT2 Cell |
| Gm24865        | 0.55 | 0.00 | 0.00 | 0.93 | 0.62 | 9 | AT2 Cell |
| Gm6133         | 0.54 | 0.00 | 0.00 | 0.76 | 0.33 | 9 | AT2 Cell |
| Cd36           | 0.40 | 0.00 | 0.00 | 0.79 | 0.32 | 9 | AT2 Cell |
| Crebrf         | 0.33 | 0.00 | 0.00 | 0.40 | 0.11 | 9 | AT2 Cell |
| Dusp1          | 0.43 | 0.00 | 0.00 | 0.49 | 0.16 | 9 | AT2 Cell |
| Tnfaip1        | 0.38 | 0.00 | 0.00 | 0.49 | 0.15 | 9 | AT2 Cell |
| Gdpd1          | 0.31 | 0.00 | 0.00 | 0.27 | 0.06 | 9 | AT2 Cell |
| Cd55           | 0.28 | 0.00 | 0.00 | 0.29 | 0.07 | 9 | AT2 Cell |
| Soat1          | 0.33 | 0.00 | 0.00 | 0.37 | 0.10 | 9 | AT2 Cell |
| Gm22426        | 0.55 | 0.00 | 0.00 | 0.89 | 0.47 | 9 | AT2 Cell |
| Lcn2           | 0.27 | 0.00 | 0.00 | 0.28 | 0.06 | 9 | AT2 Cell |
| Ppp3ca         | 0.52 | 0.00 | 0.00 | 0.66 | 0.26 | 9 | AT2 Cell |
| Arf6           | 0.42 | 0.00 | 0.00 | 0.53 | 0.18 | 9 | AT2 Cell |
| Nav2           | 0.29 | 0.00 | 0.00 | 0.32 | 0.08 | 9 | AT2 Cell |
| Abhd5          | 0.32 | 0.00 | 0.00 | 0.28 | 0.06 | 9 | AT2 Cell |
| Tgoln1         | 0.37 | 0.00 | 0.00 | 0.53 | 0.18 | 9 | AT2 Cell |
| Gm26300        | 0.54 | 0.00 | 0.00 | 0.79 | 0.36 | 9 | AT2 Cell |
| Ypel3          | 0.35 | 0.00 | 0.00 | 0.57 | 0.19 | 9 | AT2 Cell |
| Hmga1-rs1      | 0.27 | 0.00 | 0.00 | 0.29 | 0.07 | 9 | AT2 Cell |
| Diap1          | 0.31 | 0.00 | 0.00 | 0.44 | 0.13 | 9 | AT2 Cell |
| Mtfr1l         | 0.31 | 0.00 | 0.00 | 0.37 | 0.10 | 9 | AT2 Cell |
| Polr1c         | 0.32 | 0.00 | 0.00 | 0.34 | 0.09 | 9 | AT2 Cell |
| Cat            | 0.36 | 0.00 | 0.00 | 0.40 | 0.12 | 9 | AT2 Cell |
| Pdlim2         | 0.37 | 0.00 | 0.00 | 0.50 | 0.17 | 9 | AT2 Cell |
| Hmga1          | 0.27 | 0.00 | 0.00 | 0.30 | 0.07 | 9 | AT2 Cell |
| Pink1          | 0.30 | 0.00 | 0.00 | 0.37 | 0.10 | 9 | AT2 Cell |
| Wls            | 0.37 | 0.00 | 0.00 | 0.59 | 0.21 | 9 | AT2 Cell |
| Ddt            | 0.27 | 0.00 | 0.00 | 0.30 | 0.07 | 9 | AT2 Cell |
| Gm24951        | 0.27 | 0.00 | 0.00 | 0.31 | 0.08 | 9 | AT2 Cell |
| Atp6v1b2       | 0.32 | 0.00 | 0.00 | 0.40 | 0.12 | 9 | AT2 Cell |
| Sos2           | 0.28 | 0.00 | 0.00 | 0.26 | 0.06 | 9 | AT2 Cell |

|            |      |      |      |      |      |   |          |
|------------|------|------|------|------|------|---|----------|
| Rpl17      | 0.53 | 0.00 | 0.00 | 0.89 | 0.53 | 9 | AT2 Cell |
| Magi3      | 0.36 | 0.00 | 0.00 | 0.37 | 0.11 | 9 | AT2 Cell |
| Dcaf11     | 0.26 | 0.00 | 0.00 | 0.26 | 0.06 | 9 | AT2 Cell |
| Glul       | 0.34 | 0.00 | 0.00 | 0.58 | 0.21 | 9 | AT2 Cell |
| Pptc7      | 0.28 | 0.00 | 0.00 | 0.30 | 0.08 | 9 | AT2 Cell |
| Slc25a51   | 0.27 | 0.00 | 0.00 | 0.32 | 0.08 | 9 | AT2 Cell |
| Pnrc1      | 0.35 | 0.00 | 0.00 | 0.55 | 0.19 | 9 | AT2 Cell |
| Elov15     | 0.29 | 0.00 | 0.00 | 0.45 | 0.14 | 9 | AT2 Cell |
| Gm25593    | 0.37 | 0.00 | 0.00 | 0.56 | 0.20 | 9 | AT2 Cell |
| Clk4       | 0.29 | 0.00 | 0.00 | 0.36 | 0.10 | 9 | AT2 Cell |
| Sod1       | 0.56 | 0.00 | 0.00 | 0.85 | 0.46 | 9 | AT2 Cell |
| Cdc42ep3   | 0.29 | 0.00 | 0.00 | 0.44 | 0.14 | 9 | AT2 Cell |
| Dazap1     | 0.30 | 0.00 | 0.00 | 0.37 | 0.11 | 9 | AT2 Cell |
| Gm9846     | 0.40 | 0.00 | 0.00 | 0.99 | 0.89 | 9 | AT2 Cell |
| Csgalnact2 | 0.28 | 0.00 | 0.00 | 0.30 | 0.08 | 9 | AT2 Cell |
| Rps12-ps3  | 0.45 | 0.00 | 0.00 | 0.97 | 0.78 | 9 | AT2 Cell |
| Rps12      | 0.49 | 0.00 | 0.00 | 0.94 | 0.68 | 9 | AT2 Cell |
| Gzf1       | 0.31 | 0.00 | 0.00 | 0.30 | 0.08 | 9 | AT2 Cell |
| Idi1       | 0.33 | 0.00 | 0.00 | 0.29 | 0.07 | 9 | AT2 Cell |
| Rpl31      | 0.53 | 0.00 | 0.00 | 0.90 | 0.57 | 9 | AT2 Cell |
| Slc31a1    | 0.30 | 0.00 | 0.00 | 0.36 | 0.11 | 9 | AT2 Cell |
| Dapk1      | 0.29 | 0.00 | 0.00 | 0.36 | 0.10 | 9 | AT2 Cell |
| Ngfrap1    | 0.44 | 0.00 | 0.00 | 0.59 | 0.22 | 9 | AT2 Cell |
| Echs1      | 0.32 | 0.00 | 0.00 | 0.44 | 0.14 | 9 | AT2 Cell |
| Gm24276    | 0.37 | 0.00 | 0.00 | 0.57 | 0.21 | 9 | AT2 Cell |
| Pon3       | 0.28 | 0.00 | 0.00 | 0.33 | 0.09 | 9 | AT2 Cell |
| Amotl2     | 0.28 | 0.00 | 0.00 | 0.32 | 0.09 | 9 | AT2 Cell |
| Adk        | 0.26 | 0.00 | 0.00 | 0.38 | 0.11 | 9 | AT2 Cell |
| Hist1h2al  | 0.27 | 0.00 | 0.00 | 0.33 | 0.09 | 9 | AT2 Cell |
| Ctgf       | 0.35 | 0.00 | 0.00 | 0.30 | 0.08 | 9 | AT2 Cell |
| Gm8973     | 0.26 | 0.00 | 0.00 | 0.30 | 0.08 | 9 | AT2 Cell |
| Sgms1      | 0.27 | 0.00 | 0.00 | 0.31 | 0.08 | 9 | AT2 Cell |
| Itga9      | 0.27 | 0.00 | 0.00 | 0.32 | 0.09 | 9 | AT2 Cell |
| Ptov1      | 0.27 | 0.00 | 0.00 | 0.43 | 0.13 | 9 | AT2 Cell |
| Ier3       | 0.33 | 0.00 | 0.00 | 0.41 | 0.13 | 9 | AT2 Cell |
| Rnf181     | 0.31 | 0.00 | 0.00 | 0.38 | 0.12 | 9 | AT2 Cell |
| Actn1      | 0.37 | 0.00 | 0.00 | 0.57 | 0.22 | 9 | AT2 Cell |
| Zfyve21    | 0.27 | 0.00 | 0.00 | 0.31 | 0.09 | 9 | AT2 Cell |
| Snx7       | 0.27 | 0.00 | 0.00 | 0.27 | 0.07 | 9 | AT2 Cell |
| Nucb2      | 0.33 | 0.00 | 0.00 | 0.45 | 0.15 | 9 | AT2 Cell |
| Dstn       | 0.47 | 0.00 | 0.00 | 0.88 | 0.49 | 9 | AT2 Cell |
| mt-Rnr2    | 0.45 | 0.00 | 0.00 | 1.00 | 0.99 | 9 | AT2 Cell |
| Pcyt1a     | 0.32 | 0.00 | 0.00 | 0.34 | 0.10 | 9 | AT2 Cell |

|           |      |      |      |      |      |   |          |
|-----------|------|------|------|------|------|---|----------|
| Trp53bp2  | 0.29 | 0.00 | 0.00 | 0.31 | 0.08 | 9 | AT2 Cell |
| Rpl27a    | 0.44 | 0.00 | 0.00 | 0.96 | 0.78 | 9 | AT2 Cell |
| Usp8      | 0.33 | 0.00 | 0.00 | 0.46 | 0.16 | 9 | AT2 Cell |
| Cirbp     | 0.30 | 0.00 | 0.00 | 0.55 | 0.20 | 9 | AT2 Cell |
| Junb      | 0.33 | 0.00 | 0.00 | 0.52 | 0.19 | 9 | AT2 Cell |
| Clic5     | 0.34 | 0.00 | 0.00 | 0.57 | 0.22 | 9 | AT2 Cell |
| Tob2      | 0.29 | 0.00 | 0.00 | 0.33 | 0.10 | 9 | AT2 Cell |
| Osbpl9    | 0.28 | 0.00 | 0.00 | 0.39 | 0.12 | 9 | AT2 Cell |
| Drap1     | 0.32 | 0.00 | 0.00 | 0.60 | 0.24 | 9 | AT2 Cell |
| Col6a1    | 0.36 | 0.00 | 0.00 | 0.51 | 0.18 | 9 | AT2 Cell |
| Abhd17b   | 0.26 | 0.00 | 0.00 | 0.30 | 0.08 | 9 | AT2 Cell |
| Qk        | 0.39 | 0.00 | 0.00 | 0.66 | 0.29 | 9 | AT2 Cell |
| Mir692-2a | 0.27 | 0.00 | 0.00 | 0.51 | 0.19 | 9 | AT2 Cell |
| Gm22760   | 0.28 | 0.00 | 0.00 | 0.42 | 0.14 | 9 | AT2 Cell |
| Tead1     | 0.33 | 0.00 | 0.00 | 0.39 | 0.13 | 9 | AT2 Cell |
| Phlda1    | 0.37 | 0.00 | 0.00 | 0.52 | 0.19 | 9 | AT2 Cell |
| Atp2a2    | 0.26 | 0.00 | 0.00 | 0.38 | 0.12 | 9 | AT2 Cell |
| Pik3ca    | 0.34 | 0.00 | 0.00 | 0.50 | 0.18 | 9 | AT2 Cell |
| mt-Td     | 0.28 | 0.00 | 0.00 | 0.45 | 0.16 | 9 | AT2 Cell |
| Ddx39b    | 0.36 | 0.00 | 0.00 | 0.51 | 0.20 | 9 | AT2 Cell |
| Chd2      | 0.32 | 0.00 | 0.00 | 0.44 | 0.15 | 9 | AT2 Cell |
| Eif1      | 0.47 | 0.00 | 0.00 | 0.92 | 0.67 | 9 | AT2 Cell |
| Las1l     | 0.44 | 0.00 | 0.00 | 0.39 | 0.13 | 9 | AT2 Cell |
| Gm22751   | 0.27 | 0.00 | 0.00 | 0.44 | 0.15 | 9 | AT2 Cell |
| RPL24     | 0.42 | 0.00 | 0.00 | 0.84 | 0.45 | 9 | AT2 Cell |
| Cir1      | 0.30 | 0.00 | 0.00 | 0.52 | 0.20 | 9 | AT2 Cell |
| Gm20721   | 0.38 | 0.00 | 0.00 | 0.40 | 0.14 | 9 | AT2 Cell |
| Rpl36     | 0.44 | 0.00 | 0.00 | 0.91 | 0.62 | 9 | AT2 Cell |
| Rock1     | 0.43 | 0.00 | 0.00 | 0.71 | 0.34 | 9 | AT2 Cell |
| Rpl36-ps3 | 0.45 | 0.00 | 0.00 | 0.86 | 0.52 | 9 | AT2 Cell |
| Rpl41     | 0.30 | 0.00 | 0.00 | 0.99 | 0.94 | 9 | AT2 Cell |
| Cdc42bpa  | 0.27 | 0.00 | 0.00 | 0.41 | 0.14 | 9 | AT2 Cell |
| Rb1cc1    | 0.37 | 0.00 | 0.00 | 0.65 | 0.29 | 9 | AT2 Cell |
| Gm7536    | 0.39 | 0.00 | 0.00 | 0.97 | 0.81 | 9 | AT2 Cell |
| Mrpl14    | 0.28 | 0.00 | 0.00 | 0.41 | 0.14 | 9 | AT2 Cell |
| Creg1     | 0.27 | 0.00 | 0.00 | 0.45 | 0.16 | 9 | AT2 Cell |
| Ube2i     | 0.36 | 0.00 | 0.00 | 0.64 | 0.28 | 9 | AT2 Cell |
| Txnrd1    | 0.30 | 0.00 | 0.00 | 0.33 | 0.11 | 9 | AT2 Cell |
| Actn4     | 0.33 | 0.00 | 0.00 | 0.64 | 0.28 | 9 | AT2 Cell |
| Ing2      | 0.26 | 0.00 | 0.00 | 0.32 | 0.10 | 9 | AT2 Cell |
| Maf1      | 0.25 | 0.00 | 0.00 | 0.44 | 0.16 | 9 | AT2 Cell |
| Wnk1      | 0.28 | 0.00 | 0.00 | 0.46 | 0.17 | 9 | AT2 Cell |
| Degs1     | 0.28 | 0.00 | 0.00 | 0.56 | 0.22 | 9 | AT2 Cell |

|            |      |      |      |      |      |   |          |
|------------|------|------|------|------|------|---|----------|
| Rps15      | 0.37 | 0.00 | 0.00 | 0.96 | 0.78 | 9 | AT2 Cell |
| Phldb2     | 0.29 | 0.00 | 0.00 | 0.65 | 0.28 | 9 | AT2 Cell |
| Ftl1       | 0.39 | 0.00 | 0.00 | 0.90 | 0.56 | 9 | AT2 Cell |
| Acadl      | 0.29 | 0.00 | 0.00 | 0.54 | 0.22 | 9 | AT2 Cell |
| Rpl34      | 0.37 | 0.00 | 0.00 | 0.97 | 0.79 | 9 | AT2 Cell |
| Apc        | 0.26 | 0.00 | 0.00 | 0.56 | 0.22 | 9 | AT2 Cell |
| Sepp1      | 0.31 | 0.00 | 0.00 | 0.79 | 0.40 | 9 | AT2 Cell |
| Rps14      | 0.31 | 0.00 | 0.00 | 0.99 | 0.92 | 9 | AT2 Cell |
| Tmbim6     | 0.34 | 0.00 | 0.00 | 0.76 | 0.36 | 9 | AT2 Cell |
| Gm10076    | 0.30 | 0.00 | 0.00 | 0.99 | 0.92 | 9 | AT2 Cell |
| Rpl18a     | 0.34 | 0.00 | 0.00 | 0.98 | 0.82 | 9 | AT2 Cell |
| Rabac1     | 0.31 | 0.00 | 0.00 | 0.62 | 0.27 | 9 | AT2 Cell |
| Rpl10a-ps2 | 0.29 | 0.00 | 0.00 | 0.63 | 0.27 | 9 | AT2 Cell |
| Slco3a1    | 0.26 | 0.00 | 0.00 | 0.26 | 0.08 | 9 | AT2 Cell |
| Rpl37      | 0.34 | 0.00 | 0.00 | 0.96 | 0.79 | 9 | AT2 Cell |
| Atp6v0d1   | 0.25 | 0.00 | 0.00 | 0.44 | 0.17 | 9 | AT2 Cell |
| Tceal8     | 0.27 | 0.00 | 0.00 | 0.47 | 0.19 | 9 | AT2 Cell |
| App        | 0.33 | 0.00 | 0.00 | 0.93 | 0.58 | 9 | AT2 Cell |
| Cyb5       | 0.27 | 0.00 | 0.00 | 0.59 | 0.25 | 9 | AT2 Cell |
| Arid4b     | 0.31 | 0.00 | 0.00 | 0.69 | 0.32 | 9 | AT2 Cell |
| Rpl26      | 0.33 | 0.00 | 0.00 | 0.97 | 0.80 | 9 | AT2 Cell |
| Phf3       | 0.28 | 0.00 | 0.00 | 0.55 | 0.24 | 9 | AT2 Cell |
| Gm10116    | 0.35 | 0.00 | 0.00 | 0.91 | 0.62 | 9 | AT2 Cell |
| Use1       | 0.26 | 0.00 | 0.00 | 0.59 | 0.26 | 9 | AT2 Cell |
| Gm9493     | 0.34 | 0.00 | 0.00 | 0.95 | 0.73 | 9 | AT2 Cell |
| Rpl22l1    | 0.41 | 0.00 | 0.00 | 0.88 | 0.55 | 9 | AT2 Cell |
| Fau        | 0.28 | 0.00 | 0.00 | 0.98 | 0.86 | 9 | AT2 Cell |
| Golga4     | 0.32 | 0.00 | 0.00 | 0.62 | 0.28 | 9 | AT2 Cell |
| Ankrd12    | 0.30 | 0.00 | 0.00 | 0.57 | 0.26 | 9 | AT2 Cell |
| Gm7589     | 0.37 | 0.00 | 0.00 | 0.92 | 0.64 | 9 | AT2 Cell |
| Zfp91      | 0.29 | 0.00 | 0.00 | 0.64 | 0.29 | 9 | AT2 Cell |
| Gm5093     | 0.37 | 0.00 | 0.00 | 0.81 | 0.46 | 9 | AT2 Cell |
| Klf6       | 0.39 | 0.00 | 0.00 | 0.68 | 0.35 | 9 | AT2 Cell |
| Gm10335    | 0.35 | 0.00 | 0.00 | 0.95 | 0.72 | 9 | AT2 Cell |
| Gm10132    | 0.35 | 0.00 | 0.00 | 0.94 | 0.72 | 9 | AT2 Cell |
| Bsg        | 0.32 | 0.00 | 0.00 | 0.71 | 0.35 | 9 | AT2 Cell |
| Rps7       | 0.33 | 0.00 | 0.00 | 0.95 | 0.73 | 9 | AT2 Cell |
| Ubc        | 0.40 | 0.00 | 0.00 | 0.81 | 0.47 | 9 | AT2 Cell |
| Rps24      | 0.29 | 0.00 | 0.00 | 0.98 | 0.88 | 9 | AT2 Cell |
| Mtch2      | 0.25 | 0.00 | 0.00 | 0.42 | 0.17 | 9 | AT2 Cell |
| Gm11808    | 0.31 | 0.00 | 0.00 | 0.96 | 0.77 | 9 | AT2 Cell |
| Gm3940     | 0.30 | 0.00 | 0.00 | 0.69 | 0.35 | 9 | AT2 Cell |
| Akap9      | 0.30 | 0.00 | 0.00 | 0.70 | 0.35 | 9 | AT2 Cell |

|               |      |      |      |      |      |    |          |
|---------------|------|------|------|------|------|----|----------|
| Gm7808        | 0.35 | 0.00 | 0.00 | 0.89 | 0.59 | 9  | AT2 Cell |
| Srsf11        | 0.38 | 0.00 | 0.00 | 0.81 | 0.48 | 9  | AT2 Cell |
| S100a6        | 0.50 | 0.00 | 0.00 | 0.58 | 0.31 | 9  | AT2 Cell |
| Jun           | 0.31 | 0.00 | 0.00 | 0.69 | 0.35 | 9  | AT2 Cell |
| Gm5239        | 0.33 | 0.00 | 0.00 | 0.84 | 0.50 | 9  | AT2 Cell |
| Rpl23a-ps3    | 0.31 | 0.00 | 0.00 | 0.95 | 0.74 | 9  | AT2 Cell |
| Gm6472        | 0.29 | 0.00 | 0.00 | 0.96 | 0.79 | 9  | AT2 Cell |
| Rpl32         | 0.27 | 0.00 | 0.00 | 0.97 | 0.84 | 9  | AT2 Cell |
| Rps26-ps1     | 0.28 | 0.00 | 0.00 | 0.98 | 0.87 | 9  | AT2 Cell |
| Slc25a5       | 0.39 | 0.00 | 0.00 | 0.89 | 0.58 | 9  | AT2 Cell |
| Orc5          | 0.36 | 0.00 | 0.00 | 0.86 | 0.54 | 9  | AT2 Cell |
| Rpl38         | 0.30 | 0.00 | 0.00 | 0.95 | 0.72 | 9  | AT2 Cell |
| Rpl28         | 0.33 | 0.00 | 0.00 | 0.85 | 0.52 | 9  | AT2 Cell |
| Sqstm1        | 0.30 | 0.00 | 0.00 | 0.63 | 0.31 | 9  | AT2 Cell |
| Rpl11         | 0.32 | 0.00 | 0.00 | 0.92 | 0.67 | 9  | AT2 Cell |
| Rpl10a        | 0.29 | 0.00 | 0.00 | 0.94 | 0.74 | 9  | AT2 Cell |
| Gm5428        | 0.28 | 0.00 | 0.00 | 0.96 | 0.78 | 9  | AT2 Cell |
| Cox7a2l       | 0.28 | 0.00 | 0.00 | 0.76 | 0.40 | 9  | AT2 Cell |
| 2810474O19Rik | 0.27 | 0.00 | 0.00 | 0.54 | 0.26 | 9  | AT2 Cell |
| Rpl29         | 0.29 | 0.00 | 0.00 | 0.80 | 0.45 | 9  | AT2 Cell |
| Rpl23a        | 0.32 | 0.00 | 0.00 | 0.92 | 0.66 | 9  | AT2 Cell |
| Gm17511       | 0.29 | 0.00 | 0.00 | 0.91 | 0.60 | 9  | AT2 Cell |
| Emd           | 0.26 | 0.00 | 0.00 | 0.75 | 0.39 | 9  | AT2 Cell |
| Egr1          | 0.29 | 0.00 | 0.00 | 0.33 | 0.13 | 9  | AT2 Cell |
| Rpl5          | 0.28 | 0.00 | 0.00 | 0.94 | 0.74 | 9  | AT2 Cell |
| Rps17         | 0.29 | 0.00 | 0.00 | 0.95 | 0.76 | 9  | AT2 Cell |
| Rpl10         | 0.28 | 0.00 | 0.00 | 0.94 | 0.70 | 9  | AT2 Cell |
| Dbi           | 0.26 | 0.00 | 0.00 | 0.68 | 0.36 | 9  | AT2 Cell |
| Gm10288       | 0.27 | 0.00 | 0.00 | 0.96 | 0.78 | 9  | AT2 Cell |
| Gm10036       | 0.28 | 0.00 | 0.00 | 0.94 | 0.74 | 9  | AT2 Cell |
| Rpl10-ps3     | 0.27 | 0.00 | 0.00 | 0.95 | 0.72 | 9  | AT2 Cell |
| Rbm25         | 0.30 | 0.00 | 0.00 | 0.92 | 0.68 | 9  | AT2 Cell |
| Eef2          | 0.30 | 0.00 | 0.00 | 0.87 | 0.56 | 9  | AT2 Cell |
| Rpl19         | 0.25 | 0.00 | 0.00 | 0.95 | 0.74 | 9  | AT2 Cell |
| Rpl18         | 0.25 | 0.00 | 0.00 | 0.90 | 0.63 | 9  | AT2 Cell |
| Atrx          | 0.26 | 0.00 | 0.00 | 0.88 | 0.65 | 9  | AT2 Cell |
| Txn1          | 0.25 | 0.00 | 0.00 | 0.79 | 0.49 | 9  | AT2 Cell |
| Ahnak         | 0.26 | 0.00 | 0.00 | 0.65 | 0.43 | 9  | AT2 Cell |
| Akap5         | 3.47 | 0.00 | 0.00 | 0.97 | 0.06 | 10 | AT1 Cell |
| Ager          | 3.37 | 0.00 | 0.00 | 0.99 | 0.14 | 10 | AT1 Cell |
| Cldn18        | 2.97 | 0.00 | 0.00 | 0.98 | 0.15 | 10 | AT1 Cell |
| Rtkn2         | 2.69 | 0.00 | 0.00 | 0.83 | 0.03 | 10 | AT1 Cell |
| Emp2          | 2.46 | 0.00 | 0.00 | 0.98 | 0.32 | 10 | AT1 Cell |

|               |      |      |      |      |      |    |          |
|---------------|------|------|------|------|------|----|----------|
| Lmo7          | 2.34 | 0.00 | 0.00 | 0.86 | 0.10 | 10 | AT1 Cell |
| Aqp5          | 2.32 | 0.00 | 0.00 | 0.73 | 0.04 | 10 | AT1 Cell |
| Vegfa         | 2.31 | 0.00 | 0.00 | 0.86 | 0.14 | 10 | AT1 Cell |
| Krt7          | 2.28 | 0.00 | 0.00 | 0.77 | 0.05 | 10 | AT1 Cell |
| Clic5         | 2.28 | 0.00 | 0.00 | 0.95 | 0.21 | 10 | AT1 Cell |
| Col4a3        | 2.23 | 0.00 | 0.00 | 0.67 | 0.03 | 10 | AT1 Cell |
| Spock2        | 2.22 | 0.00 | 0.00 | 0.71 | 0.03 | 10 | AT1 Cell |
| S100a6        | 2.22 | 0.00 | 0.00 | 0.95 | 0.29 | 10 | AT1 Cell |
| Gprc5a        | 2.08 | 0.00 | 0.00 | 0.70 | 0.05 | 10 | AT1 Cell |
| Col4a4        | 2.03 | 0.00 | 0.00 | 0.60 | 0.02 | 10 | AT1 Cell |
| Msln          | 2.03 | 0.00 | 0.00 | 0.61 | 0.03 | 10 | AT1 Cell |
| Clic3         | 2.01 | 0.00 | 0.00 | 0.72 | 0.07 | 10 | AT1 Cell |
| Hopx          | 1.98 | 0.00 | 0.00 | 0.70 | 0.08 | 10 | AT1 Cell |
| Serpinb6b     | 1.95 | 0.00 | 0.00 | 0.73 | 0.15 | 10 | AT1 Cell |
| Myh14         | 1.94 | 0.00 | 0.00 | 0.70 | 0.07 | 10 | AT1 Cell |
| 2200002D01Rik | 1.92 | 0.00 | 0.00 | 0.64 | 0.05 | 10 | AT1 Cell |
| Pdgfa         | 1.92 | 0.00 | 0.00 | 0.67 | 0.09 | 10 | AT1 Cell |
| Tinagl1       | 1.91 | 0.00 | 0.00 | 0.63 | 0.09 | 10 | AT1 Cell |
| Sec14l3       | 1.86 | 0.00 | 0.00 | 0.88 | 0.08 | 10 | AT1 Cell |
| Sema3e        | 1.85 | 0.00 | 0.00 | 0.54 | 0.03 | 10 | AT1 Cell |
| Scnn1g        | 1.84 | 0.00 | 0.00 | 0.56 | 0.02 | 10 | AT1 Cell |
| Pdpn          | 1.83 | 0.00 | 0.00 | 0.58 | 0.03 | 10 | AT1 Cell |
| S100a14       | 1.81 | 0.00 | 0.00 | 0.51 | 0.02 | 10 | AT1 Cell |
| Krt19         | 1.81 | 0.00 | 0.00 | 0.59 | 0.05 | 10 | AT1 Cell |
| Timp3         | 1.81 | 0.00 | 0.00 | 0.90 | 0.34 | 10 | AT1 Cell |
| Ndnf          | 1.78 | 0.00 | 0.00 | 0.48 | 0.03 | 10 | AT1 Cell |
| Cdkn2b        | 1.78 | 0.00 | 0.00 | 0.58 | 0.04 | 10 | AT1 Cell |
| Tspan8        | 1.76 | 0.00 | 0.00 | 0.68 | 0.10 | 10 | AT1 Cell |
| Sema3a        | 1.73 | 0.00 | 0.00 | 0.47 | 0.02 | 10 | AT1 Cell |
| Slc39a8       | 1.72 | 0.00 | 0.00 | 0.56 | 0.06 | 10 | AT1 Cell |
| Scnn1a        | 1.69 | 0.00 | 0.00 | 0.58 | 0.05 | 10 | AT1 Cell |
| Icam1         | 1.65 | 0.00 | 0.00 | 0.62 | 0.08 | 10 | AT1 Cell |
| Ndst1         | 1.65 | 0.00 | 0.00 | 0.56 | 0.10 | 10 | AT1 Cell |
| Prdx6         | 1.63 | 0.00 | 0.00 | 0.79 | 0.26 | 10 | AT1 Cell |
| Ano1          | 1.61 | 0.00 | 0.00 | 0.48 | 0.04 | 10 | AT1 Cell |
| Cryab         | 1.59 | 0.00 | 0.00 | 0.67 | 0.12 | 10 | AT1 Cell |
| Gipc2         | 1.58 | 0.00 | 0.00 | 0.47 | 0.03 | 10 | AT1 Cell |
| Ahnak         | 1.58 | 0.00 | 0.00 | 0.90 | 0.42 | 10 | AT1 Cell |
| Itgb6         | 1.55 | 0.00 | 0.00 | 0.39 | 0.01 | 10 | AT1 Cell |
| Fam174b       | 1.55 | 0.00 | 0.00 | 0.46 | 0.04 | 10 | AT1 Cell |
| Anxa3         | 1.54 | 0.00 | 0.00 | 0.74 | 0.21 | 10 | AT1 Cell |
| Flrt3         | 1.53 | 0.00 | 0.00 | 0.41 | 0.02 | 10 | AT1 Cell |
| Tmem37        | 1.50 | 0.00 | 0.00 | 0.43 | 0.03 | 10 | AT1 Cell |

|           |      |      |      |      |      |    |          |
|-----------|------|------|------|------|------|----|----------|
| Krt8      | 1.49 | 0.00 | 0.00 | 0.50 | 0.07 | 10 | AT1 Cell |
| Anxa1     | 1.49 | 0.00 | 0.00 | 0.67 | 0.17 | 10 | AT1 Cell |
| Mthfd1    | 1.49 | 0.00 | 0.00 | 0.49 | 0.07 | 10 | AT1 Cell |
| Rab11fip1 | 1.45 | 0.00 | 0.00 | 0.46 | 0.04 | 10 | AT1 Cell |
| Agrn      | 1.44 | 0.00 | 0.00 | 0.58 | 0.12 | 10 | AT1 Cell |
| Syn3      | 1.44 | 0.00 | 0.00 | 0.57 | 0.14 | 10 | AT1 Cell |
| Alcam     | 1.44 | 0.00 | 0.00 | 0.80 | 0.21 | 10 | AT1 Cell |
| Gramd2    | 1.44 | 0.00 | 0.00 | 0.45 | 0.04 | 10 | AT1 Cell |
| Cadm1     | 1.44 | 0.00 | 0.00 | 0.57 | 0.13 | 10 | AT1 Cell |
| Mal2      | 1.44 | 0.00 | 0.00 | 0.45 | 0.05 | 10 | AT1 Cell |
| F3        | 1.42 | 0.00 | 0.00 | 0.41 | 0.03 | 10 | AT1 Cell |
| Cystm1    | 1.41 | 0.00 | 0.00 | 0.49 | 0.07 | 10 | AT1 Cell |
| Dag1      | 1.40 | 0.00 | 0.00 | 0.48 | 0.08 | 10 | AT1 Cell |
| Rgcc      | 1.40 | 0.00 | 0.00 | 0.58 | 0.16 | 10 | AT1 Cell |
| Ptprf     | 1.38 | 0.00 | 0.00 | 0.63 | 0.14 | 10 | AT1 Cell |
| Krt18     | 1.34 | 0.00 | 0.00 | 0.46 | 0.07 | 10 | AT1 Cell |
| Igfbp7    | 1.33 | 0.00 | 0.00 | 0.89 | 0.38 | 10 | AT1 Cell |
| Tspan15   | 1.31 | 0.00 | 0.00 | 0.46 | 0.06 | 10 | AT1 Cell |
| Cd9       | 1.29 | 0.00 | 0.00 | 0.83 | 0.33 | 10 | AT1 Cell |
| Ctgf      | 1.29 | 0.00 | 0.00 | 0.42 | 0.07 | 10 | AT1 Cell |
| Lamc2     | 1.27 | 0.00 | 0.00 | 0.37 | 0.03 | 10 | AT1 Cell |
| Scd2      | 1.27 | 0.00 | 0.00 | 0.61 | 0.20 | 10 | AT1 Cell |
| Ezr       | 1.26 | 0.00 | 0.00 | 0.65 | 0.20 | 10 | AT1 Cell |
| Slc6a14   | 1.26 | 0.00 | 0.00 | 0.35 | 0.03 | 10 | AT1 Cell |
| Il18r1    | 1.24 | 0.00 | 0.00 | 0.42 | 0.06 | 10 | AT1 Cell |
| Cxadr     | 1.24 | 0.00 | 0.00 | 0.37 | 0.05 | 10 | AT1 Cell |
| Wwp1      | 1.23 | 0.00 | 0.00 | 0.49 | 0.12 | 10 | AT1 Cell |
| Fbln5     | 1.23 | 0.00 | 0.00 | 0.63 | 0.16 | 10 | AT1 Cell |
| Atp1b1    | 1.22 | 0.00 | 0.00 | 0.61 | 0.17 | 10 | AT1 Cell |
| Mmp11     | 1.22 | 0.00 | 0.00 | 0.37 | 0.04 | 10 | AT1 Cell |
| Trp53bp2  | 1.22 | 0.00 | 0.00 | 0.42 | 0.08 | 10 | AT1 Cell |
| Nkx2-1    | 1.20 | 0.00 | 0.00 | 0.46 | 0.09 | 10 | AT1 Cell |
| Tead1     | 1.20 | 0.00 | 0.00 | 0.48 | 0.13 | 10 | AT1 Cell |
| Bcam      | 1.18 | 0.00 | 0.00 | 0.41 | 0.08 | 10 | AT1 Cell |
| Epcam     | 1.17 | 0.00 | 0.00 | 0.44 | 0.09 | 10 | AT1 Cell |
| Scnn1b    | 1.17 | 0.00 | 0.00 | 0.32 | 0.02 | 10 | AT1 Cell |
| Nav2      | 1.15 | 0.00 | 0.00 | 0.40 | 0.08 | 10 | AT1 Cell |
| Pmp22     | 1.14 | 0.00 | 0.00 | 0.76 | 0.30 | 10 | AT1 Cell |
| Dennd3    | 1.14 | 0.00 | 0.00 | 0.39 | 0.06 | 10 | AT1 Cell |
| Serpinb9  | 1.13 | 0.00 | 0.00 | 0.35 | 0.07 | 10 | AT1 Cell |
| Llg12     | 1.12 | 0.00 | 0.00 | 0.33 | 0.03 | 10 | AT1 Cell |
| Wwc1      | 1.11 | 0.00 | 0.00 | 0.36 | 0.05 | 10 | AT1 Cell |
| Hs2st1    | 1.11 | 0.00 | 0.00 | 0.32 | 0.05 | 10 | AT1 Cell |

|           |      |      |      |      |      |    |          |
|-----------|------|------|------|------|------|----|----------|
| Spint2    | 1.11 | 0.00 | 0.00 | 0.45 | 0.10 | 10 | AT1 Cell |
| Akr1c14   | 1.10 | 0.00 | 0.00 | 0.27 | 0.02 | 10 | AT1 Cell |
| Gja1      | 1.09 | 0.00 | 0.00 | 0.42 | 0.08 | 10 | AT1 Cell |
| Cldn7     | 1.09 | 0.00 | 0.00 | 0.37 | 0.07 | 10 | AT1 Cell |
| Pkp2      | 1.08 | 0.00 | 0.00 | 0.30 | 0.03 | 10 | AT1 Cell |
| Arhgef26  | 1.07 | 0.00 | 0.00 | 0.36 | 0.06 | 10 | AT1 Cell |
| Pard6b    | 1.06 | 0.00 | 0.00 | 0.28 | 0.02 | 10 | AT1 Cell |
| Eps8l2    | 1.06 | 0.00 | 0.00 | 0.30 | 0.03 | 10 | AT1 Cell |
| Slco3a1   | 1.06 | 0.00 | 0.00 | 0.36 | 0.07 | 10 | AT1 Cell |
| Tacstd2   | 1.05 | 0.00 | 0.00 | 0.27 | 0.02 | 10 | AT1 Cell |
| Col4a5    | 1.01 | 0.00 | 0.00 | 0.26 | 0.03 | 10 | AT1 Cell |
| Fam189a2  | 1.01 | 0.00 | 0.00 | 0.30 | 0.04 | 10 | AT1 Cell |
| Osbpl6    | 0.99 | 0.00 | 0.00 | 0.30 | 0.05 | 10 | AT1 Cell |
| Sparc     | 0.97 | 0.00 | 0.00 | 0.99 | 0.73 | 10 | AT1 Cell |
| Ctsh      | 0.95 | 0.00 | 0.00 | 0.64 | 0.19 | 10 | AT1 Cell |
| Npnt      | 0.92 | 0.00 | 0.00 | 0.70 | 0.23 | 10 | AT1 Cell |
| Fads3     | 0.91 | 0.00 | 0.00 | 0.27 | 0.04 | 10 | AT1 Cell |
| Limch1    | 0.85 | 0.00 | 0.00 | 0.85 | 0.29 | 10 | AT1 Cell |
| Cldn3     | 1.09 | 0.00 | 0.00 | 0.45 | 0.11 | 10 | AT1 Cell |
| Malat1    | 0.67 | 0.00 | 0.00 | 1.00 | 1.00 | 10 | AT1 Cell |
| Neat1     | 1.13 | 0.00 | 0.00 | 0.68 | 0.26 | 10 | AT1 Cell |
| Wdr45     | 0.98 | 0.00 | 0.00 | 0.35 | 0.07 | 10 | AT1 Cell |
| Anxa2     | 1.06 | 0.00 | 0.00 | 0.83 | 0.46 | 10 | AT1 Cell |
| Ppp3ca    | 1.17 | 0.00 | 0.00 | 0.66 | 0.26 | 10 | AT1 Cell |
| Pvrl3     | 1.06 | 0.00 | 0.00 | 0.39 | 0.09 | 10 | AT1 Cell |
| App       | 0.95 | 0.00 | 0.00 | 0.91 | 0.59 | 10 | AT1 Cell |
| Slc1a5    | 1.09 | 0.00 | 0.00 | 0.40 | 0.10 | 10 | AT1 Cell |
| Cttnbp2nl | 1.11 | 0.00 | 0.00 | 0.41 | 0.10 | 10 | AT1 Cell |
| Mpp5      | 1.12 | 0.00 | 0.00 | 0.42 | 0.11 | 10 | AT1 Cell |
| Msn       | 1.00 | 0.00 | 0.00 | 0.81 | 0.42 | 10 | AT1 Cell |
| Bend7     | 0.98 | 0.00 | 0.00 | 0.31 | 0.06 | 10 | AT1 Cell |
| Myl12a    | 0.92 | 0.00 | 0.00 | 0.89 | 0.65 | 10 | AT1 Cell |
| Fam134b   | 0.92 | 0.00 | 0.00 | 0.30 | 0.06 | 10 | AT1 Cell |
| Pde7a     | 0.97 | 0.00 | 0.00 | 0.31 | 0.06 | 10 | AT1 Cell |
| F11r      | 1.02 | 0.00 | 0.00 | 0.49 | 0.16 | 10 | AT1 Cell |
| Fgf1      | 0.95 | 0.00 | 0.00 | 0.29 | 0.06 | 10 | AT1 Cell |
| Nbl1      | 0.85 | 0.00 | 0.00 | 0.30 | 0.06 | 10 | AT1 Cell |
| Bsg       | 1.06 | 0.00 | 0.00 | 0.70 | 0.35 | 10 | AT1 Cell |
| Gata6     | 0.95 | 0.00 | 0.00 | 0.34 | 0.08 | 10 | AT1 Cell |
| Magi3     | 1.08 | 0.00 | 0.00 | 0.39 | 0.11 | 10 | AT1 Cell |
| Cdh1      | 0.86 | 0.00 | 0.00 | 0.32 | 0.07 | 10 | AT1 Cell |
| Ier3      | 1.03 | 0.00 | 0.00 | 0.43 | 0.13 | 10 | AT1 Cell |
| S100a11   | 0.94 | 0.00 | 0.00 | 0.80 | 0.48 | 10 | AT1 Cell |

|                |      |      |      |      |      |    |          |
|----------------|------|------|------|------|------|----|----------|
| Fzd2           | 0.91 | 0.00 | 0.00 | 0.27 | 0.05 | 10 | AT1 Cell |
| Tmsb4x         | 0.54 | 0.00 | 0.00 | 0.99 | 0.88 | 10 | AT1 Cell |
| Klf6           | 1.01 | 0.00 | 0.00 | 0.69 | 0.35 | 10 | AT1 Cell |
| Crip2          | 0.85 | 0.00 | 0.00 | 0.77 | 0.40 | 10 | AT1 Cell |
| Samhd1         | 0.92 | 0.00 | 0.00 | 0.52 | 0.18 | 10 | AT1 Cell |
| Sdc1           | 0.95 | 0.00 | 0.00 | 0.39 | 0.11 | 10 | AT1 Cell |
| Tmem63b        | 0.83 | 0.00 | 0.00 | 0.28 | 0.06 | 10 | AT1 Cell |
| Vamp8          | 0.91 | 0.00 | 0.00 | 0.67 | 0.33 | 10 | AT1 Cell |
| Prkci          | 0.92 | 0.00 | 0.00 | 0.40 | 0.12 | 10 | AT1 Cell |
| Prdx6b         | 0.79 | 0.00 | 0.00 | 0.25 | 0.05 | 10 | AT1 Cell |
| Hspg2          | 0.79 | 0.00 | 0.00 | 0.26 | 0.06 | 10 | AT1 Cell |
| Lgals3         | 0.68 | 0.00 | 0.00 | 0.44 | 0.14 | 10 | AT1 Cell |
| Mir22hg        | 0.81 | 0.00 | 0.00 | 0.27 | 0.06 | 10 | AT1 Cell |
| Pgrmc1         | 0.96 | 0.00 | 0.00 | 0.47 | 0.18 | 10 | AT1 Cell |
| Gde1           | 0.91 | 0.00 | 0.00 | 0.41 | 0.14 | 10 | AT1 Cell |
| Nceh1          | 0.81 | 0.00 | 0.00 | 0.26 | 0.06 | 10 | AT1 Cell |
| Fam177a        | 0.92 | 0.00 | 0.00 | 0.53 | 0.23 | 10 | AT1 Cell |
| Wwc2           | 0.89 | 0.00 | 0.00 | 0.38 | 0.12 | 10 | AT1 Cell |
| Dstn           | 0.75 | 0.00 | 0.00 | 0.78 | 0.50 | 10 | AT1 Cell |
| Lrpap1         | 1.00 | 0.00 | 0.00 | 0.41 | 0.14 | 10 | AT1 Cell |
| Aqp1           | 0.80 | 0.00 | 0.00 | 0.49 | 0.19 | 10 | AT1 Cell |
| Qk             | 0.89 | 0.00 | 0.00 | 0.60 | 0.29 | 10 | AT1 Cell |
| Gm6169         | 0.88 | 0.00 | 0.00 | 0.36 | 0.12 | 10 | AT1 Cell |
| Cyr61          | 0.79 | 0.00 | 0.00 | 0.38 | 0.12 | 10 | AT1 Cell |
| Plp2           | 0.91 | 0.00 | 0.00 | 0.37 | 0.12 | 10 | AT1 Cell |
| Myo1c          | 0.77 | 0.00 | 0.00 | 0.31 | 0.09 | 10 | AT1 Cell |
| Nbeal1         | 0.81 | 0.00 | 0.00 | 0.30 | 0.09 | 10 | AT1 Cell |
| Phactr1        | 0.81 | 0.00 | 0.00 | 0.27 | 0.07 | 10 | AT1 Cell |
| 1700047117Rik2 | 0.84 | 0.00 | 0.00 | 0.46 | 0.18 | 10 | AT1 Cell |
| Ctdspl         | 0.79 | 0.00 | 0.00 | 0.33 | 0.10 | 10 | AT1 Cell |
| Cav1           | 0.60 | 0.00 | 0.00 | 0.66 | 0.30 | 10 | AT1 Cell |
| Creb3l2        | 0.86 | 0.00 | 0.00 | 0.37 | 0.13 | 10 | AT1 Cell |
| Cux1           | 0.90 | 0.00 | 0.00 | 0.42 | 0.16 | 10 | AT1 Cell |
| Sdpr           | 0.59 | 0.00 | 0.00 | 0.84 | 0.51 | 10 | AT1 Cell |
| Tppp3          | 0.72 | 0.00 | 0.00 | 0.36 | 0.12 | 10 | AT1 Cell |
| Tns1           | 0.79 | 0.00 | 0.00 | 0.51 | 0.22 | 10 | AT1 Cell |
| Tspan2         | 0.83 | 0.00 | 0.00 | 0.35 | 0.12 | 10 | AT1 Cell |
| Efna1          | 0.75 | 0.00 | 0.00 | 0.27 | 0.07 | 10 | AT1 Cell |
| Chka           | 0.76 | 0.00 | 0.00 | 0.31 | 0.10 | 10 | AT1 Cell |
| Bex4           | 0.52 | 0.00 | 0.00 | 0.38 | 0.12 | 10 | AT1 Cell |
| Gadd45b        | 0.75 | 0.00 | 0.00 | 0.28 | 0.08 | 10 | AT1 Cell |
| Tes            | 0.72 | 0.00 | 0.00 | 0.30 | 0.09 | 10 | AT1 Cell |
| Asah1          | 0.81 | 0.00 | 0.00 | 0.34 | 0.12 | 10 | AT1 Cell |

|         |      |      |      |      |      |    |          |
|---------|------|------|------|------|------|----|----------|
| Chpt1   | 0.80 | 0.00 | 0.00 | 0.34 | 0.11 | 10 | AT1 Cell |
| Cnn2    | 0.72 | 0.00 | 0.00 | 0.66 | 0.38 | 10 | AT1 Cell |
| Ptgs1   | 0.78 | 0.00 | 0.00 | 0.31 | 0.10 | 10 | AT1 Cell |
| Utrn    | 0.80 | 0.00 | 0.00 | 0.40 | 0.16 | 10 | AT1 Cell |
| Galnt18 | 0.72 | 0.00 | 0.00 | 0.32 | 0.10 | 10 | AT1 Cell |
| Rabac1  | 0.78 | 0.00 | 0.00 | 0.54 | 0.27 | 10 | AT1 Cell |
| Atp8a1  | 0.82 | 0.00 | 0.00 | 0.38 | 0.15 | 10 | AT1 Cell |
| Wnk1    | 0.84 | 0.00 | 0.00 | 0.41 | 0.17 | 10 | AT1 Cell |
| Chchd10 | 0.63 | 0.00 | 0.00 | 0.36 | 0.13 | 10 | AT1 Cell |
| Meg3    | 0.49 | 0.00 | 0.00 | 0.50 | 0.21 | 10 | AT1 Cell |
| Tfdp2   | 0.77 | 0.00 | 0.00 | 0.28 | 0.09 | 10 | AT1 Cell |
| Prkcdbp | 0.78 | 0.00 | 0.00 | 0.31 | 0.11 | 10 | AT1 Cell |
| Tacc2   | 0.71 | 0.00 | 0.00 | 0.25 | 0.07 | 10 | AT1 Cell |
| Ctnna1  | 0.72 | 0.00 | 0.00 | 0.62 | 0.35 | 10 | AT1 Cell |
| Dpysl2  | 0.82 | 0.00 | 0.00 | 0.40 | 0.17 | 10 | AT1 Cell |
| Wls     | 0.83 | 0.00 | 0.00 | 0.46 | 0.22 | 10 | AT1 Cell |
| Tjp2    | 0.76 | 0.00 | 0.00 | 0.39 | 0.16 | 10 | AT1 Cell |
| Gm7334  | 0.76 | 0.00 | 0.00 | 0.31 | 0.11 | 10 | AT1 Cell |
| Arl4c   | 0.70 | 0.00 | 0.00 | 0.29 | 0.10 | 10 | AT1 Cell |
| Hes1    | 0.70 | 0.00 | 0.00 | 0.55 | 0.28 | 10 | AT1 Cell |
| Fnbp1l  | 0.74 | 0.00 | 0.00 | 0.50 | 0.25 | 10 | AT1 Cell |
| Ddx47   | 0.78 | 0.00 | 0.00 | 0.36 | 0.15 | 10 | AT1 Cell |
| Ehd2    | 0.72 | 0.00 | 0.00 | 0.35 | 0.14 | 10 | AT1 Cell |
| Anxa4   | 0.71 | 0.00 | 0.00 | 0.27 | 0.09 | 10 | AT1 Cell |
| Capn2   | 0.72 | 0.00 | 0.00 | 0.36 | 0.15 | 10 | AT1 Cell |
| Calm2   | 0.58 | 0.00 | 0.00 | 0.82 | 0.64 | 10 | AT1 Cell |
| Sptbn1  | 0.57 | 0.00 | 0.00 | 0.78 | 0.54 | 10 | AT1 Cell |
| Cers2   | 0.76 | 0.00 | 0.00 | 0.34 | 0.14 | 10 | AT1 Cell |
| Actb    | 0.30 | 0.00 | 0.00 | 1.00 | 0.98 | 10 | AT1 Cell |
| Tpm3    | 0.52 | 0.00 | 0.00 | 0.86 | 0.69 | 10 | AT1 Cell |
| Amotl2  | 0.63 | 0.00 | 0.00 | 0.26 | 0.09 | 10 | AT1 Cell |
| Gng5    | 0.70 | 0.00 | 0.00 | 0.65 | 0.45 | 10 | AT1 Cell |
| Btg3    | 0.73 | 0.00 | 0.00 | 0.29 | 0.11 | 10 | AT1 Cell |
| Cav2    | 0.60 | 0.00 | 0.00 | 0.42 | 0.18 | 10 | AT1 Cell |
| Rps19   | 0.53 | 0.00 | 0.00 | 0.91 | 0.82 | 10 | AT1 Cell |
| Mrpl14  | 0.73 | 0.00 | 0.00 | 0.35 | 0.15 | 10 | AT1 Cell |
| Gpx4    | 0.69 | 0.00 | 0.00 | 0.58 | 0.37 | 10 | AT1 Cell |
| Hdgf    | 0.73 | 0.00 | 0.00 | 0.46 | 0.24 | 10 | AT1 Cell |
| Ece1    | 0.60 | 0.00 | 0.00 | 0.50 | 0.25 | 10 | AT1 Cell |
| Ptrf    | 0.57 | 0.00 | 0.00 | 0.60 | 0.35 | 10 | AT1 Cell |
| Epn2    | 0.69 | 0.00 | 0.00 | 0.30 | 0.12 | 10 | AT1 Cell |
| Errfi1  | 0.56 | 0.00 | 0.00 | 0.27 | 0.09 | 10 | AT1 Cell |
| Mbip    | 0.67 | 0.00 | 0.00 | 0.29 | 0.11 | 10 | AT1 Cell |

|               |      |      |      |      |      |    |          |
|---------------|------|------|------|------|------|----|----------|
| Gsn           | 0.32 | 0.00 | 0.00 | 0.50 | 0.24 | 10 | AT1 Cell |
| Tgfb2         | 0.60 | 0.00 | 0.00 | 0.33 | 0.14 | 10 | AT1 Cell |
| Ssr2          | 0.68 | 0.00 | 0.00 | 0.53 | 0.30 | 10 | AT1 Cell |
| Selenbp1      | 0.80 | 0.00 | 0.00 | 0.43 | 0.22 | 10 | AT1 Cell |
| Apc           | 0.71 | 0.00 | 0.00 | 0.44 | 0.23 | 10 | AT1 Cell |
| Lrrc58        | 0.31 | 0.00 | 0.00 | 0.98 | 0.91 | 10 | AT1 Cell |
| Nckap5        | 0.64 | 0.00 | 0.00 | 0.31 | 0.12 | 10 | AT1 Cell |
| Col4a2        | 0.51 | 0.00 | 0.00 | 0.67 | 0.42 | 10 | AT1 Cell |
| Rhoa          | 0.62 | 0.00 | 0.00 | 0.65 | 0.46 | 10 | AT1 Cell |
| Tpm3-rs7      | 0.45 | 0.00 | 0.00 | 0.84 | 0.69 | 10 | AT1 Cell |
| Myo1b         | 0.65 | 0.00 | 0.00 | 0.36 | 0.16 | 10 | AT1 Cell |
| F2r           | 0.61 | 0.00 | 0.00 | 0.32 | 0.14 | 10 | AT1 Cell |
| Fdx1          | 0.71 | 0.00 | 0.00 | 0.31 | 0.14 | 10 | AT1 Cell |
| Arhgap5       | 0.71 | 0.00 | 0.00 | 0.38 | 0.18 | 10 | AT1 Cell |
| Rabgap1l      | 0.63 | 0.00 | 0.00 | 0.26 | 0.10 | 10 | AT1 Cell |
| Iqgap1        | 0.55 | 0.00 | 0.00 | 0.66 | 0.44 | 10 | AT1 Cell |
| Myl6          | 0.43 | 0.00 | 0.00 | 0.81 | 0.69 | 10 | AT1 Cell |
| Sod1          | 0.59 | 0.00 | 0.00 | 0.64 | 0.47 | 10 | AT1 Cell |
| Selenbp2      | 0.74 | 0.00 | 0.00 | 0.34 | 0.16 | 10 | AT1 Cell |
| Rnf181        | 0.60 | 0.00 | 0.00 | 0.27 | 0.12 | 10 | AT1 Cell |
| Crlf3         | 0.52 | 0.00 | 0.00 | 0.30 | 0.13 | 10 | AT1 Cell |
| Sptlc2        | 0.61 | 0.00 | 0.00 | 0.31 | 0.14 | 10 | AT1 Cell |
| 2810474O19Rik | 0.62 | 0.00 | 0.00 | 0.45 | 0.26 | 10 | AT1 Cell |
| Rbms1         | 0.56 | 0.00 | 0.00 | 0.57 | 0.38 | 10 | AT1 Cell |
| Anxa5         | 0.57 | 0.00 | 0.00 | 0.58 | 0.40 | 10 | AT1 Cell |
| Tjp1          | 0.50 | 0.00 | 0.00 | 0.33 | 0.16 | 10 | AT1 Cell |
| Stx7          | 0.58 | 0.00 | 0.00 | 0.30 | 0.14 | 10 | AT1 Cell |
| Son           | 0.40 | 0.00 | 0.00 | 0.83 | 0.73 | 10 | AT1 Cell |
| Mprp          | 0.54 | 0.00 | 0.00 | 0.38 | 0.21 | 10 | AT1 Cell |
| 4930523C07Rik | 0.58 | 0.00 | 0.00 | 0.34 | 0.18 | 10 | AT1 Cell |
| Kank2         | 0.52 | 0.00 | 0.00 | 0.25 | 0.11 | 10 | AT1 Cell |
| Ralbp1        | 0.53 | 0.00 | 0.00 | 0.49 | 0.32 | 10 | AT1 Cell |
| Arhgef2       | 0.56 | 0.00 | 0.00 | 0.36 | 0.20 | 10 | AT1 Cell |
| Pdlim2        | 0.56 | 0.00 | 0.00 | 0.33 | 0.17 | 10 | AT1 Cell |
| Tm9sf3        | 0.55 | 0.00 | 0.00 | 0.50 | 0.34 | 10 | AT1 Cell |
| Cdkn1a        | 0.36 | 0.00 | 0.00 | 0.32 | 0.16 | 10 | AT1 Cell |
| Fam101b       | 0.55 | 0.00 | 0.00 | 0.33 | 0.18 | 10 | AT1 Cell |
| P4hb          | 0.51 | 0.00 | 0.00 | 0.56 | 0.40 | 10 | AT1 Cell |
| Lamp1         | 0.48 | 0.00 | 0.00 | 0.58 | 0.42 | 10 | AT1 Cell |
| Tmbim6        | 0.47 | 0.00 | 0.00 | 0.54 | 0.37 | 10 | AT1 Cell |
| Sypl          | 0.49 | 0.00 | 0.00 | 0.41 | 0.25 | 10 | AT1 Cell |
| Swt1          | 0.57 | 0.00 | 0.00 | 0.29 | 0.15 | 10 | AT1 Cell |
| Myl12b        | 0.34 | 0.00 | 0.00 | 0.73 | 0.60 | 10 | AT1 Cell |

|               |      |      |      |      |      |    |          |
|---------------|------|------|------|------|------|----|----------|
| Cdkn1b        | 0.53 | 0.00 | 0.00 | 0.36 | 0.21 | 10 | AT1 Cell |
| Elovl5        | 0.48 | 0.00 | 0.00 | 0.29 | 0.15 | 10 | AT1 Cell |
| Actn4         | 0.50 | 0.00 | 0.00 | 0.44 | 0.29 | 10 | AT1 Cell |
| Gnas          | 0.30 | 0.00 | 0.00 | 0.79 | 0.67 | 10 | AT1 Cell |
| Tmem59        | 0.50 | 0.00 | 0.00 | 0.54 | 0.40 | 10 | AT1 Cell |
| 4933426M11Rik | 0.50 | 0.00 | 0.00 | 0.28 | 0.15 | 10 | AT1 Cell |
| Zfhx3         | 0.49 | 0.00 | 0.00 | 0.31 | 0.17 | 10 | AT1 Cell |
| Atp2b1        | 0.34 | 0.00 | 0.00 | 0.72 | 0.58 | 10 | AT1 Cell |
| Rb1cc1        | 0.50 | 0.00 | 0.00 | 0.45 | 0.30 | 10 | AT1 Cell |
| 1810037I17Rik | 0.46 | 0.00 | 0.00 | 0.47 | 0.32 | 10 | AT1 Cell |
| Eif1a         | 0.49 | 0.00 | 0.00 | 0.27 | 0.14 | 10 | AT1 Cell |
| Ddb1          | 0.50 | 0.00 | 0.00 | 0.32 | 0.18 | 10 | AT1 Cell |
| Carkd         | 0.50 | 0.00 | 0.00 | 0.28 | 0.15 | 10 | AT1 Cell |
| Sptan1        | 0.47 | 0.00 | 0.00 | 0.30 | 0.16 | 10 | AT1 Cell |
| Klf9          | 0.46 | 0.00 | 0.00 | 0.33 | 0.19 | 10 | AT1 Cell |
| Pdcd6ip       | 0.50 | 0.00 | 0.00 | 0.29 | 0.16 | 10 | AT1 Cell |
| Rin2          | 0.47 | 0.00 | 0.00 | 0.28 | 0.15 | 10 | AT1 Cell |
| Actg1         | 0.30 | 0.00 | 0.00 | 0.84 | 0.76 | 10 | AT1 Cell |
| Kras          | 0.51 | 0.00 | 0.00 | 0.32 | 0.18 | 10 | AT1 Cell |
| Vapa          | 0.47 | 0.00 | 0.00 | 0.36 | 0.22 | 10 | AT1 Cell |
| Parva         | 0.46 | 0.00 | 0.00 | 0.28 | 0.15 | 10 | AT1 Cell |
| Dnajc3        | 0.49 | 0.00 | 0.00 | 0.40 | 0.27 | 10 | AT1 Cell |
| Serpinb6a     | 0.48 | 0.00 | 0.00 | 0.31 | 0.18 | 10 | AT1 Cell |
| Srrm2         | 0.38 | 0.00 | 0.00 | 0.71 | 0.60 | 10 | AT1 Cell |
| Akap13        | 0.43 | 0.00 | 0.00 | 0.41 | 0.26 | 10 | AT1 Cell |
| Ppic          | 0.43 | 0.00 | 0.00 | 0.53 | 0.38 | 10 | AT1 Cell |
| Sept15        | 0.49 | 0.00 | 0.00 | 0.47 | 0.33 | 10 | AT1 Cell |
| Rnase4        | 0.43 | 0.00 | 0.00 | 0.32 | 0.18 | 10 | AT1 Cell |
| Spop          | 0.41 | 0.00 | 0.00 | 0.47 | 0.33 | 10 | AT1 Cell |
| Tbrg1         | 0.45 | 0.00 | 0.00 | 0.43 | 0.30 | 10 | AT1 Cell |
| Pkm           | 0.45 | 0.00 | 0.00 | 0.36 | 0.22 | 10 | AT1 Cell |
| Gm3150        | 0.52 | 0.00 | 0.00 | 0.28 | 0.16 | 10 | AT1 Cell |
| 1110008F13Rik | 0.43 | 0.00 | 0.00 | 0.28 | 0.16 | 10 | AT1 Cell |
| Wwtr1         | 0.44 | 0.00 | 0.00 | 0.26 | 0.14 | 10 | AT1 Cell |
| Diap1         | 0.43 | 0.00 | 0.00 | 0.26 | 0.14 | 10 | AT1 Cell |
| Btg2          | 0.33 | 0.00 | 0.00 | 0.37 | 0.23 | 10 | AT1 Cell |
| Mllt4         | 0.41 | 0.00 | 0.00 | 0.34 | 0.21 | 10 | AT1 Cell |
| Syne2         | 0.45 | 0.00 | 0.00 | 0.25 | 0.14 | 10 | AT1 Cell |
| Svil          | 0.50 | 0.00 | 0.00 | 0.28 | 0.17 | 10 | AT1 Cell |
| Lrrfip1       | 0.46 | 0.00 | 0.00 | 0.38 | 0.25 | 10 | AT1 Cell |
| Ptms          | 0.37 | 0.00 | 0.00 | 0.53 | 0.40 | 10 | AT1 Cell |
| Cd2ap         | 0.38 | 0.00 | 0.00 | 0.48 | 0.34 | 10 | AT1 Cell |
| Srsf11        | 0.47 | 0.00 | 0.00 | 0.58 | 0.49 | 10 | AT1 Cell |

|          |      |      |      |      |      |    |          |
|----------|------|------|------|------|------|----|----------|
| Hmgn1    | 0.34 | 0.00 | 0.00 | 0.57 | 0.45 | 10 | AT1 Cell |
| Aplp2    | 0.44 | 0.00 | 0.00 | 0.50 | 0.39 | 10 | AT1 Cell |
| Selk     | 0.38 | 0.00 | 0.00 | 0.44 | 0.31 | 10 | AT1 Cell |
| Atp6v1a  | 0.41 | 0.00 | 0.00 | 0.40 | 0.28 | 10 | AT1 Cell |
| Pls3     | 0.41 | 0.00 | 0.00 | 0.31 | 0.20 | 10 | AT1 Cell |
| Lpin2    | 0.36 | 0.00 | 0.00 | 0.25 | 0.15 | 10 | AT1 Cell |
| S100a13  | 0.39 | 0.00 | 0.00 | 0.37 | 0.25 | 10 | AT1 Cell |
| Bag1     | 0.43 | 0.00 | 0.00 | 0.35 | 0.23 | 10 | AT1 Cell |
| Slc38a2  | 0.41 | 0.00 | 0.00 | 0.30 | 0.19 | 10 | AT1 Cell |
| Tmem176b | 0.41 | 0.00 | 0.00 | 0.45 | 0.34 | 10 | AT1 Cell |
| Actn1    | 0.40 | 0.00 | 0.00 | 0.34 | 0.22 | 10 | AT1 Cell |
| Akap9    | 0.37 | 0.00 | 0.00 | 0.48 | 0.36 | 10 | AT1 Cell |
| Tmed2    | 0.39 | 0.00 | 0.00 | 0.36 | 0.24 | 10 | AT1 Cell |
| Kif5b    | 0.33 | 0.00 | 0.00 | 0.58 | 0.48 | 10 | AT1 Cell |
| Mmp14    | 0.36 | 0.00 | 0.00 | 0.37 | 0.25 | 10 | AT1 Cell |
| Cab39    | 0.39 | 0.00 | 0.00 | 0.27 | 0.17 | 10 | AT1 Cell |
| Adam10   | 0.40 | 0.00 | 0.00 | 0.29 | 0.18 | 10 | AT1 Cell |
| Mettl7a1 | 0.31 | 0.00 | 0.00 | 0.33 | 0.21 | 10 | AT1 Cell |
| Lamc1    | 0.36 | 0.00 | 0.00 | 0.25 | 0.16 | 10 | AT1 Cell |
| Tbl1x    | 0.37 | 0.00 | 0.00 | 0.36 | 0.25 | 10 | AT1 Cell |
| Drap1    | 0.33 | 0.00 | 0.00 | 0.36 | 0.25 | 10 | AT1 Cell |
| Os9      | 0.42 | 0.00 | 0.00 | 0.30 | 0.20 | 10 | AT1 Cell |
| Wasl     | 0.40 | 0.00 | 0.00 | 0.28 | 0.18 | 10 | AT1 Cell |
| Rock1    | 0.35 | 0.00 | 0.00 | 0.45 | 0.35 | 10 | AT1 Cell |
| Phldb2   | 0.38 | 0.00 | 0.00 | 0.40 | 0.29 | 10 | AT1 Cell |
| Sdc4     | 0.29 | 0.00 | 0.00 | 0.34 | 0.23 | 10 | AT1 Cell |
| Eif1     | 0.25 | 0.00 | 0.00 | 0.72 | 0.67 | 10 | AT1 Cell |
| Snx4     | 0.39 | 0.00 | 0.00 | 0.35 | 0.25 | 10 | AT1 Cell |
| Tra2a    | 0.39 | 0.00 | 0.00 | 0.31 | 0.21 | 10 | AT1 Cell |
| Timp2    | 0.34 | 0.00 | 0.00 | 0.31 | 0.21 | 10 | AT1 Cell |
| Bcap31   | 0.39 | 0.00 | 0.00 | 0.30 | 0.21 | 10 | AT1 Cell |
| Spcs2    | 0.37 | 0.00 | 0.00 | 0.40 | 0.31 | 10 | AT1 Cell |
| Rtn3     | 0.41 | 0.00 | 0.00 | 0.35 | 0.25 | 10 | AT1 Cell |
| Atp6v0e  | 0.39 | 0.00 | 0.00 | 0.29 | 0.20 | 10 | AT1 Cell |
| Laptm4a  | 0.27 | 0.00 | 0.00 | 0.61 | 0.52 | 10 | AT1 Cell |
| Skp1a    | 0.37 | 0.00 | 0.00 | 0.48 | 0.40 | 10 | AT1 Cell |
| Ubl3     | 0.34 | 0.00 | 0.00 | 0.28 | 0.19 | 10 | AT1 Cell |
| Sec62    | 0.28 | 0.00 | 0.00 | 0.54 | 0.45 | 10 | AT1 Cell |
| Myh9     | 0.30 | 0.00 | 0.00 | 0.43 | 0.33 | 10 | AT1 Cell |
| Mbnl1    | 0.34 | 0.00 | 0.00 | 0.35 | 0.27 | 10 | AT1 Cell |
| Mcl1     | 0.27 | 0.00 | 0.00 | 0.32 | 0.23 | 10 | AT1 Cell |
| Ktn1     | 0.30 | 0.00 | 0.00 | 0.47 | 0.38 | 10 | AT1 Cell |
| Zc3h7a   | 0.33 | 0.00 | 0.00 | 0.37 | 0.29 | 10 | AT1 Cell |

|          |      |      |      |      |      |    |                   |
|----------|------|------|------|------|------|----|-------------------|
| Tceb2    | 0.26 | 0.00 | 0.00 | 0.53 | 0.47 | 10 | AT1 Cell          |
| Tmed10   | 0.30 | 0.00 | 0.00 | 0.44 | 0.36 | 10 | AT1 Cell          |
| Cyb5     | 0.31 | 0.00 | 0.00 | 0.35 | 0.26 | 10 | AT1 Cell          |
| Arf1     | 0.26 | 0.00 | 0.00 | 0.50 | 0.42 | 10 | AT1 Cell          |
| Ypel3    | 0.28 | 0.00 | 0.00 | 0.28 | 0.20 | 10 | AT1 Cell          |
| Rab7     | 0.28 | 0.00 | 0.00 | 0.33 | 0.25 | 10 | AT1 Cell          |
| Vps28    | 0.32 | 0.00 | 0.00 | 0.25 | 0.18 | 10 | AT1 Cell          |
| Chmp2a   | 0.29 | 0.00 | 0.00 | 0.39 | 0.31 | 10 | AT1 Cell          |
| Tubb4b   | 0.27 | 0.00 | 0.00 | 0.26 | 0.19 | 10 | AT1 Cell          |
| Adipor1  | 0.30 | 0.00 | 0.00 | 0.31 | 0.24 | 10 | AT1 Cell          |
| Rab6a    | 0.33 | 0.00 | 0.00 | 0.28 | 0.21 | 10 | AT1 Cell          |
| Itm2c    | 0.31 | 0.00 | 0.00 | 0.30 | 0.23 | 10 | AT1 Cell          |
| Cox17    | 0.28 | 0.00 | 0.00 | 0.31 | 0.24 | 10 | AT1 Cell          |
| Cfl2     | 0.27 | 0.00 | 0.00 | 0.31 | 0.25 | 10 | AT1 Cell          |
| Gm22759  | 0.25 | 0.00 | 0.00 | 0.66 | 0.64 | 10 | AT1 Cell          |
| Ankrd12  | 0.31 | 0.00 | 0.00 | 0.33 | 0.27 | 10 | AT1 Cell          |
| Usp34    | 0.26 | 0.00 | 0.00 | 0.32 | 0.25 | 10 | AT1 Cell          |
| Nfe2l1   | 0.26 | 0.00 | 0.00 | 0.29 | 0.23 | 10 | AT1 Cell          |
| Gm26300  | 0.25 | 0.00 | 0.00 | 0.42 | 0.38 | 10 | AT1 Cell          |
| Ppib     | 0.25 | 0.00 | 0.00 | 0.48 | 0.44 | 10 | AT1 Cell          |
| Fmo2     | 2.67 | 0.00 | 0.00 | 0.95 | 0.14 | 11 | Matrix Fibroblast |
| Gpx3     | 2.52 | 0.00 | 0.00 | 0.93 | 0.11 | 11 | Matrix Fibroblast |
| Inmt     | 2.49 | 0.00 | 0.00 | 0.62 | 0.03 | 11 | Matrix Fibroblast |
| Ifitm1   | 2.17 | 0.00 | 0.00 | 0.93 | 0.11 | 11 | Matrix Fibroblast |
| Lox      | 2.00 | 0.00 | 0.00 | 0.80 | 0.11 | 11 | Matrix Fibroblast |
| Fos      | 1.98 | 0.00 | 0.00 | 0.79 | 0.17 | 11 | Matrix Fibroblast |
| Gsn      | 1.87 | 0.00 | 0.00 | 0.88 | 0.23 | 11 | Matrix Fibroblast |
| Tsc22d3  | 1.86 | 0.00 | 0.00 | 0.86 | 0.22 | 11 | Matrix Fibroblast |
| Tcf21    | 1.83 | 0.00 | 0.00 | 0.91 | 0.15 | 11 | Matrix Fibroblast |
| Peg3     | 1.82 | 0.00 | 0.00 | 0.90 | 0.28 | 11 | Matrix Fibroblast |
| Hsd11b1  | 1.74 | 0.00 | 0.00 | 0.65 | 0.07 | 11 | Matrix Fibroblast |
| Limch1   | 1.70 | 0.00 | 0.00 | 0.97 | 0.28 | 11 | Matrix Fibroblast |
| Cyr61    | 1.68 | 0.00 | 0.00 | 0.57 | 0.11 | 11 | Matrix Fibroblast |
| Selenbp1 | 1.66 | 0.00 | 0.00 | 0.82 | 0.20 | 11 | Matrix Fibroblast |
| Dpep1    | 1.66 | 0.00 | 0.00 | 0.58 | 0.05 | 11 | Matrix Fibroblast |
| Glul     | 1.59 | 0.00 | 0.00 | 0.76 | 0.20 | 11 | Matrix Fibroblast |
| G0s2     | 1.58 | 0.00 | 0.00 | 0.62 | 0.12 | 11 | Matrix Fibroblast |
| Selenbp2 | 1.58 | 0.00 | 0.00 | 0.70 | 0.15 | 11 | Matrix Fibroblast |
| Ppp1r2   | 1.52 | 0.00 | 0.00 | 0.78 | 0.24 | 11 | Matrix Fibroblast |
| Il6ra    | 1.50 | 0.00 | 0.00 | 0.60 | 0.09 | 11 | Matrix Fibroblast |
| Cdo1     | 1.45 | 0.00 | 0.00 | 0.48 | 0.05 | 11 | Matrix Fibroblast |
| Nap1l1   | 1.44 | 0.00 | 0.00 | 0.88 | 0.46 | 11 | Matrix Fibroblast |
| Ndr2     | 1.43 | 0.00 | 0.00 | 0.55 | 0.06 | 11 | Matrix Fibroblast |

|          |      |      |      |      |      |    |                   |
|----------|------|------|------|------|------|----|-------------------|
| Smoc2    | 1.43 | 0.00 | 0.00 | 0.39 | 0.02 | 11 | Matrix Fibroblast |
| Drap1    | 1.41 | 0.00 | 0.00 | 0.71 | 0.23 | 11 | Matrix Fibroblast |
| Gm4204   | 1.38 | 0.00 | 0.00 | 0.89 | 0.49 | 11 | Matrix Fibroblast |
| Adamts1  | 1.33 | 0.00 | 0.00 | 0.64 | 0.20 | 11 | Matrix Fibroblast |
| Klf9     | 1.33 | 0.00 | 0.00 | 0.65 | 0.18 | 11 | Matrix Fibroblast |
| Gadd45b  | 1.28 | 0.00 | 0.00 | 0.43 | 0.07 | 11 | Matrix Fibroblast |
| Tns1     | 1.28 | 0.00 | 0.00 | 0.71 | 0.22 | 11 | Matrix Fibroblast |
| Mark3    | 1.27 | 0.00 | 0.00 | 0.56 | 0.15 | 11 | Matrix Fibroblast |
| Ogn      | 1.25 | 0.00 | 0.00 | 0.57 | 0.12 | 11 | Matrix Fibroblast |
| Npr3     | 1.23 | 0.00 | 0.00 | 0.50 | 0.12 | 11 | Matrix Fibroblast |
| Bnip3    | 1.22 | 0.00 | 0.00 | 0.43 | 0.07 | 11 | Matrix Fibroblast |
| Nebl     | 1.22 | 0.00 | 0.00 | 0.45 | 0.09 | 11 | Matrix Fibroblast |
| Apoe     | 1.21 | 0.00 | 0.00 | 0.91 | 0.26 | 11 | Matrix Fibroblast |
| Mettl21e | 1.20 | 0.00 | 0.00 | 0.32 | 0.02 | 11 | Matrix Fibroblast |
| Ifitm2   | 1.18 | 0.00 | 0.00 | 0.75 | 0.31 | 11 | Matrix Fibroblast |
| H6pd     | 1.18 | 0.00 | 0.00 | 0.43 | 0.08 | 11 | Matrix Fibroblast |
| Vldlr    | 1.17 | 0.00 | 0.00 | 0.46 | 0.10 | 11 | Matrix Fibroblast |
| Gm7676   | 1.16 | 0.00 | 0.00 | 0.62 | 0.17 | 11 | Matrix Fibroblast |
| Serping1 | 1.13 | 0.00 | 0.00 | 0.54 | 0.11 | 11 | Matrix Fibroblast |
| Zbtb16   | 1.13 | 0.00 | 0.00 | 0.37 | 0.05 | 11 | Matrix Fibroblast |
| Fhl1     | 1.09 | 0.00 | 0.00 | 0.84 | 0.28 | 11 | Matrix Fibroblast |
| D4Wsu53e | 1.09 | 0.00 | 0.00 | 0.92 | 0.59 | 11 | Matrix Fibroblast |
| Fkbp5    | 1.09 | 0.00 | 0.00 | 0.41 | 0.08 | 11 | Matrix Fibroblast |
| Maf      | 1.09 | 0.00 | 0.00 | 0.67 | 0.18 | 11 | Matrix Fibroblast |
| Macf1    | 1.05 | 0.00 | 0.00 | 0.92 | 0.51 | 11 | Matrix Fibroblast |
| Atp1a2   | 1.04 | 0.00 | 0.00 | 0.43 | 0.09 | 11 | Matrix Fibroblast |
| Eln      | 1.04 | 0.00 | 0.00 | 0.60 | 0.14 | 11 | Matrix Fibroblast |
| Mgp      | 1.03 | 0.00 | 0.00 | 0.92 | 0.30 | 11 | Matrix Fibroblast |
| Ptgis    | 1.02 | 0.00 | 0.00 | 0.34 | 0.04 | 11 | Matrix Fibroblast |
| Pla2g12a | 0.99 | 0.00 | 0.00 | 0.27 | 0.04 | 11 | Matrix Fibroblast |
| Ahcy     | 0.99 | 0.00 | 0.00 | 0.28 | 0.04 | 11 | Matrix Fibroblast |
| Gm4737   | 0.92 | 0.00 | 0.00 | 0.25 | 0.03 | 11 | Matrix Fibroblast |
| Ifitm7   | 0.91 | 0.00 | 0.00 | 0.27 | 0.02 | 11 | Matrix Fibroblast |
| Mfap4    | 0.85 | 0.00 | 0.00 | 0.90 | 0.22 | 11 | Matrix Fibroblast |
| Adh1     | 0.69 | 0.00 | 0.00 | 0.62 | 0.16 | 11 | Matrix Fibroblast |
| Gyg      | 0.91 | 0.00 | 0.00 | 0.61 | 0.18 | 11 | Matrix Fibroblast |
| Hspb1    | 1.15 | 0.00 | 0.00 | 0.48 | 0.13 | 11 | Matrix Fibroblast |
| Zfp36    | 1.22 | 0.00 | 0.00 | 0.52 | 0.15 | 11 | Matrix Fibroblast |
| Sesn1    | 0.92 | 0.00 | 0.00 | 0.31 | 0.05 | 11 | Matrix Fibroblast |
| Egr1     | 1.40 | 0.00 | 0.00 | 0.47 | 0.13 | 11 | Matrix Fibroblast |
| Rps4x    | 0.69 | 0.00 | 0.00 | 0.98 | 0.86 | 11 | Matrix Fibroblast |
| Nr2f2    | 1.05 | 0.00 | 0.00 | 0.59 | 0.20 | 11 | Matrix Fibroblast |
| Ctsl     | 1.03 | 0.00 | 0.00 | 0.77 | 0.38 | 11 | Matrix Fibroblast |

|            |      |      |      |      |      |    |                   |
|------------|------|------|------|------|------|----|-------------------|
| Fbxo32     | 0.92 | 0.00 | 0.00 | 0.26 | 0.04 | 11 | Matrix Fibroblast |
| Malat1     | 0.50 | 0.00 | 0.00 | 1.00 | 1.00 | 11 | Matrix Fibroblast |
| Col13a1    | 0.87 | 0.00 | 0.00 | 0.38 | 0.09 | 11 | Matrix Fibroblast |
| Lbh        | 0.85 | 0.00 | 0.00 | 0.56 | 0.18 | 11 | Matrix Fibroblast |
| Nampt      | 1.01 | 0.00 | 0.00 | 0.33 | 0.07 | 11 | Matrix Fibroblast |
| Dusp1      | 1.11 | 0.00 | 0.00 | 0.49 | 0.16 | 11 | Matrix Fibroblast |
| Fn1        | 0.75 | 0.00 | 0.00 | 0.63 | 0.22 | 11 | Matrix Fibroblast |
| Plac9b     | 0.78 | 0.00 | 0.00 | 0.73 | 0.29 | 11 | Matrix Fibroblast |
| Tpt1       | 0.59 | 0.00 | 0.00 | 0.99 | 0.87 | 11 | Matrix Fibroblast |
| Plac9a     | 0.77 | 0.00 | 0.00 | 0.73 | 0.29 | 11 | Matrix Fibroblast |
| Palld      | 0.88 | 0.00 | 0.00 | 0.51 | 0.16 | 11 | Matrix Fibroblast |
| Angptl4    | 0.97 | 0.00 | 0.00 | 0.29 | 0.06 | 11 | Matrix Fibroblast |
| Rbp1       | 0.76 | 0.00 | 0.00 | 0.56 | 0.18 | 11 | Matrix Fibroblast |
| Mertk      | 0.84 | 0.00 | 0.00 | 0.28 | 0.06 | 11 | Matrix Fibroblast |
| Cacna1d    | 0.77 | 0.00 | 0.00 | 0.26 | 0.05 | 11 | Matrix Fibroblast |
| Rps27      | 0.60 | 0.00 | 0.00 | 0.97 | 0.81 | 11 | Matrix Fibroblast |
| Spon1      | 0.73 | 0.00 | 0.00 | 0.29 | 0.06 | 11 | Matrix Fibroblast |
| Ppap2b     | 0.98 | 0.00 | 0.00 | 0.57 | 0.23 | 11 | Matrix Fibroblast |
| Fxyd1      | 0.82 | 0.00 | 0.00 | 0.34 | 0.08 | 11 | Matrix Fibroblast |
| Cnst       | 0.79 | 0.00 | 0.00 | 0.25 | 0.05 | 11 | Matrix Fibroblast |
| Tgm2       | 0.91 | 0.00 | 0.00 | 0.33 | 0.08 | 11 | Matrix Fibroblast |
| Zfp36l1    | 0.99 | 0.00 | 0.00 | 0.77 | 0.44 | 11 | Matrix Fibroblast |
| Glud1      | 0.99 | 0.00 | 0.00 | 0.47 | 0.16 | 11 | Matrix Fibroblast |
| Tgfbr3     | 0.79 | 0.00 | 0.00 | 0.31 | 0.08 | 11 | Matrix Fibroblast |
| Trp53inp1  | 0.81 | 0.00 | 0.00 | 0.30 | 0.07 | 11 | Matrix Fibroblast |
| Gm9846     | 0.50 | 0.00 | 0.00 | 0.99 | 0.89 | 11 | Matrix Fibroblast |
| Txnip      | 0.91 | 0.00 | 0.00 | 0.57 | 0.24 | 11 | Matrix Fibroblast |
| Myo1b      | 0.95 | 0.00 | 0.00 | 0.45 | 0.16 | 11 | Matrix Fibroblast |
| Gm26669    | 1.09 | 0.00 | 0.00 | 0.53 | 0.22 | 11 | Matrix Fibroblast |
| Echdc2     | 0.77 | 0.00 | 0.00 | 0.25 | 0.05 | 11 | Matrix Fibroblast |
| Kank3      | 0.79 | 0.00 | 0.00 | 0.42 | 0.13 | 11 | Matrix Fibroblast |
| Aldh2      | 0.85 | 0.00 | 0.00 | 0.65 | 0.32 | 11 | Matrix Fibroblast |
| Rpl23a-ps3 | 0.59 | 0.00 | 0.00 | 0.94 | 0.74 | 11 | Matrix Fibroblast |
| Cp         | 0.78 | 0.00 | 0.00 | 0.39 | 0.12 | 11 | Matrix Fibroblast |
| Hp         | 0.79 | 0.00 | 0.00 | 0.36 | 0.10 | 11 | Matrix Fibroblast |
| Gm10335    | 0.59 | 0.00 | 0.00 | 0.93 | 0.72 | 11 | Matrix Fibroblast |
| Cebpb      | 0.80 | 0.00 | 0.00 | 0.32 | 0.08 | 11 | Matrix Fibroblast |
| Gm10132    | 0.60 | 0.00 | 0.00 | 0.92 | 0.72 | 11 | Matrix Fibroblast |
| Fibin      | 0.78 | 0.00 | 0.00 | 0.38 | 0.12 | 11 | Matrix Fibroblast |
| Angpt1     | 0.87 | 0.00 | 0.00 | 0.28 | 0.07 | 11 | Matrix Fibroblast |
| Rpl13      | 0.54 | 0.00 | 0.00 | 0.95 | 0.79 | 11 | Matrix Fibroblast |
| Igfbp3     | 0.72 | 0.00 | 0.00 | 0.27 | 0.06 | 11 | Matrix Fibroblast |
| Rpl13-ps3  | 0.57 | 0.00 | 0.00 | 0.94 | 0.75 | 11 | Matrix Fibroblast |

|           |      |      |      |      |      |    |                   |
|-----------|------|------|------|------|------|----|-------------------|
| Rpl23     | 0.50 | 0.00 | 0.00 | 0.97 | 0.86 | 11 | Matrix Fibroblast |
| Junb      | 0.97 | 0.00 | 0.00 | 0.48 | 0.19 | 11 | Matrix Fibroblast |
| Pabpc1    | 0.58 | 0.00 | 0.00 | 0.95 | 0.80 | 11 | Matrix Fibroblast |
| Phlda1    | 0.89 | 0.00 | 0.00 | 0.49 | 0.20 | 11 | Matrix Fibroblast |
| Rpl34     | 0.55 | 0.00 | 0.00 | 0.95 | 0.79 | 11 | Matrix Fibroblast |
| Gas5      | 0.73 | 0.00 | 0.00 | 0.79 | 0.53 | 11 | Matrix Fibroblast |
| Cdh11     | 0.54 | 0.00 | 0.00 | 0.51 | 0.18 | 11 | Matrix Fibroblast |
| Rpl39     | 0.53 | 0.00 | 0.00 | 0.95 | 0.80 | 11 | Matrix Fibroblast |
| Sparcl1   | 0.57 | 0.00 | 0.00 | 0.76 | 0.38 | 11 | Matrix Fibroblast |
| Lama4     | 0.79 | 0.00 | 0.00 | 0.38 | 0.13 | 11 | Matrix Fibroblast |
| Cir1      | 0.92 | 0.00 | 0.00 | 0.47 | 0.20 | 11 | Matrix Fibroblast |
| Mxra8     | 0.72 | 0.00 | 0.00 | 0.43 | 0.16 | 11 | Matrix Fibroblast |
| Nexn      | 0.70 | 0.00 | 0.00 | 0.52 | 0.21 | 11 | Matrix Fibroblast |
| Lamb1     | 0.77 | 0.00 | 0.00 | 0.42 | 0.15 | 11 | Matrix Fibroblast |
| Clec3b    | 0.65 | 0.00 | 0.00 | 0.26 | 0.06 | 11 | Matrix Fibroblast |
| Rps26-ps1 | 0.46 | 0.00 | 0.00 | 0.98 | 0.87 | 11 | Matrix Fibroblast |
| Sept4     | 0.63 | 0.00 | 0.00 | 0.54 | 0.22 | 11 | Matrix Fibroblast |
| Rpl23a    | 0.57 | 0.00 | 0.00 | 0.88 | 0.66 | 11 | Matrix Fibroblast |
| Rps8      | 0.47 | 0.00 | 0.00 | 0.96 | 0.81 | 11 | Matrix Fibroblast |
| Rps14     | 0.42 | 0.00 | 0.00 | 0.98 | 0.92 | 11 | Matrix Fibroblast |
| Prex2     | 0.74 | 0.00 | 0.00 | 0.45 | 0.18 | 11 | Matrix Fibroblast |
| Col6a1    | 0.69 | 0.00 | 0.00 | 0.46 | 0.18 | 11 | Matrix Fibroblast |
| Ifrd1     | 0.82 | 0.00 | 0.00 | 0.39 | 0.15 | 11 | Matrix Fibroblast |
| Rps17     | 0.51 | 0.00 | 0.00 | 0.92 | 0.77 | 11 | Matrix Fibroblast |
| Snai2     | 0.78 | 0.00 | 0.00 | 0.34 | 0.11 | 11 | Matrix Fibroblast |
| mt-Rnr2   | 0.41 | 0.00 | 0.00 | 1.00 | 0.99 | 11 | Matrix Fibroblast |
| Mettl7a1  | 0.72 | 0.00 | 0.00 | 0.49 | 0.21 | 11 | Matrix Fibroblast |
| Rpl9      | 0.57 | 0.00 | 0.00 | 0.84 | 0.62 | 11 | Matrix Fibroblast |
| Gm26384   | 0.64 | 0.00 | 0.00 | 0.75 | 0.48 | 11 | Matrix Fibroblast |
| Rps23     | 0.47 | 0.00 | 0.00 | 0.95 | 0.79 | 11 | Matrix Fibroblast |
| Cd302     | 0.77 | 0.00 | 0.00 | 0.38 | 0.14 | 11 | Matrix Fibroblast |
| RPL24     | 0.64 | 0.00 | 0.00 | 0.74 | 0.45 | 11 | Matrix Fibroblast |
| Rps28     | 0.44 | 0.00 | 0.00 | 0.97 | 0.83 | 11 | Matrix Fibroblast |
| Camk2n1   | 0.75 | 0.00 | 0.00 | 0.37 | 0.14 | 11 | Matrix Fibroblast |
| Specc1l   | 0.74 | 0.00 | 0.00 | 0.34 | 0.12 | 11 | Matrix Fibroblast |
| Tacc1     | 0.77 | 0.00 | 0.00 | 0.48 | 0.22 | 11 | Matrix Fibroblast |
| Btg2      | 1.03 | 0.00 | 0.00 | 0.48 | 0.23 | 11 | Matrix Fibroblast |
| Rpl9-ps6  | 0.50 | 0.00 | 0.00 | 0.91 | 0.73 | 11 | Matrix Fibroblast |
| Rpl37a    | 0.43 | 0.00 | 0.00 | 0.95 | 0.83 | 11 | Matrix Fibroblast |
| Rps26     | 0.39 | 0.00 | 0.00 | 0.98 | 0.90 | 11 | Matrix Fibroblast |
| Snhg9     | 0.74 | 0.00 | 0.00 | 0.29 | 0.10 | 11 | Matrix Fibroblast |
| Ifngr1    | 0.73 | 0.00 | 0.00 | 0.50 | 0.23 | 11 | Matrix Fibroblast |
| Tenc1     | 0.84 | 0.00 | 0.00 | 0.36 | 0.14 | 11 | Matrix Fibroblast |

|               |      |      |      |      |      |    |                   |
|---------------|------|------|------|------|------|----|-------------------|
| Mir682        | 0.41 | 0.00 | 0.00 | 0.96 | 0.85 | 11 | Matrix Fibroblast |
| Ivd           | 0.75 | 0.00 | 0.00 | 0.27 | 0.08 | 11 | Matrix Fibroblast |
| Rpl37         | 0.45 | 0.00 | 0.00 | 0.94 | 0.80 | 11 | Matrix Fibroblast |
| Gm22759       | 0.50 | 0.00 | 0.00 | 0.85 | 0.64 | 11 | Matrix Fibroblast |
| Fblim1        | 0.65 | 0.00 | 0.00 | 0.39 | 0.16 | 11 | Matrix Fibroblast |
| Gm22758       | 0.47 | 0.00 | 0.00 | 0.90 | 0.68 | 11 | Matrix Fibroblast |
| 2410004N09Rik | 0.71 | 0.00 | 0.00 | 0.30 | 0.10 | 11 | Matrix Fibroblast |
| Cdkn1c        | 0.54 | 0.00 | 0.00 | 0.42 | 0.18 | 11 | Matrix Fibroblast |
| Gm10263       | 0.45 | 0.00 | 0.00 | 0.94 | 0.76 | 11 | Matrix Fibroblast |
| Gm24865       | 0.51 | 0.00 | 0.00 | 0.85 | 0.62 | 11 | Matrix Fibroblast |
| Med13l        | 0.73 | 0.00 | 0.00 | 0.32 | 0.12 | 11 | Matrix Fibroblast |
| Jun           | 0.89 | 0.00 | 0.00 | 0.61 | 0.36 | 11 | Matrix Fibroblast |
| Rps25         | 0.41 | 0.00 | 0.00 | 0.94 | 0.80 | 11 | Matrix Fibroblast |
| Bgn           | 0.53 | 0.00 | 0.00 | 0.51 | 0.23 | 11 | Matrix Fibroblast |
| Snhg6         | 0.78 | 0.00 | 0.00 | 0.40 | 0.18 | 11 | Matrix Fibroblast |
| Pkn2          | 0.74 | 0.00 | 0.00 | 0.43 | 0.20 | 11 | Matrix Fibroblast |
| 2410006H16Rik | 0.71 | 0.00 | 0.00 | 0.50 | 0.25 | 11 | Matrix Fibroblast |
| Gm8730        | 0.38 | 0.00 | 0.00 | 0.94 | 0.82 | 11 | Matrix Fibroblast |
| Sms           | 0.78 | 0.00 | 0.00 | 0.30 | 0.11 | 11 | Matrix Fibroblast |
| Rps29         | 0.33 | 0.00 | 0.00 | 0.99 | 0.90 | 11 | Matrix Fibroblast |
| Rps15a        | 0.41 | 0.00 | 0.00 | 0.94 | 0.81 | 11 | Matrix Fibroblast |
| Tpm1          | 0.45 | 0.00 | 0.00 | 0.78 | 0.51 | 11 | Matrix Fibroblast |
| C230081A13Rik | 0.66 | 0.00 | 0.00 | 0.28 | 0.09 | 11 | Matrix Fibroblast |
| Rpl17         | 0.54 | 0.00 | 0.00 | 0.77 | 0.53 | 11 | Matrix Fibroblast |
| Clk1          | 0.70 | 0.00 | 0.00 | 0.58 | 0.34 | 11 | Matrix Fibroblast |
| Rpl36         | 0.51 | 0.00 | 0.00 | 0.83 | 0.62 | 11 | Matrix Fibroblast |
| Plxdc2        | 0.55 | 0.00 | 0.00 | 0.33 | 0.12 | 11 | Matrix Fibroblast |
| D19Bwg1357e   | 0.75 | 0.00 | 0.00 | 0.33 | 0.13 | 11 | Matrix Fibroblast |
| Rplp0         | 0.36 | 0.00 | 0.00 | 0.94 | 0.83 | 11 | Matrix Fibroblast |
| Plcb4         | 0.74 | 0.00 | 0.00 | 0.34 | 0.14 | 11 | Matrix Fibroblast |
| Rpl36-ps3     | 0.55 | 0.00 | 0.00 | 0.76 | 0.53 | 11 | Matrix Fibroblast |
| Wipi1         | 0.70 | 0.00 | 0.00 | 0.32 | 0.12 | 11 | Matrix Fibroblast |
| Pik3r1        | 0.79 | 0.00 | 0.00 | 0.31 | 0.12 | 11 | Matrix Fibroblast |
| Thbs1         | 0.61 | 0.00 | 0.00 | 0.33 | 0.12 | 11 | Matrix Fibroblast |
| Limd1         | 0.70 | 0.00 | 0.00 | 0.39 | 0.17 | 11 | Matrix Fibroblast |
| Rpl10-ps3     | 0.46 | 0.00 | 0.00 | 0.89 | 0.72 | 11 | Matrix Fibroblast |
| Npnt          | 0.35 | 0.00 | 0.00 | 0.51 | 0.24 | 11 | Matrix Fibroblast |
| Dapk1         | 0.66 | 0.00 | 0.00 | 0.28 | 0.11 | 11 | Matrix Fibroblast |
| Gabarapl1     | 0.72 | 0.00 | 0.00 | 0.35 | 0.15 | 11 | Matrix Fibroblast |
| Map1lc3b      | 0.66 | 0.00 | 0.00 | 0.61 | 0.39 | 11 | Matrix Fibroblast |
| Rpl10         | 0.45 | 0.00 | 0.00 | 0.87 | 0.71 | 11 | Matrix Fibroblast |
| Lrp1          | 0.58 | 0.00 | 0.00 | 0.30 | 0.11 | 11 | Matrix Fibroblast |
| Rps27a        | 0.41 | 0.00 | 0.00 | 0.92 | 0.76 | 11 | Matrix Fibroblast |

|               |      |      |      |      |      |    |                   |
|---------------|------|------|------|------|------|----|-------------------|
| Col6a2        | 0.65 | 0.00 | 0.00 | 0.34 | 0.14 | 11 | Matrix Fibroblast |
| Rpl31         | 0.48 | 0.00 | 0.00 | 0.80 | 0.57 | 11 | Matrix Fibroblast |
| Rpl21         | 0.38 | 0.00 | 0.00 | 0.92 | 0.74 | 11 | Matrix Fibroblast |
| Snhg5         | 0.72 | 0.00 | 0.00 | 0.37 | 0.17 | 11 | Matrix Fibroblast |
| 1810058I24Rik | 0.69 | 0.00 | 0.00 | 0.40 | 0.20 | 11 | Matrix Fibroblast |
| Rps16         | 0.35 | 0.00 | 0.00 | 0.94 | 0.84 | 11 | Matrix Fibroblast |
| Ybx3          | 0.73 | 0.00 | 0.00 | 0.39 | 0.19 | 11 | Matrix Fibroblast |
| Mettl7a2      | 0.63 | 0.00 | 0.00 | 0.27 | 0.10 | 11 | Matrix Fibroblast |
| Gm17511       | 0.45 | 0.00 | 0.00 | 0.80 | 0.60 | 11 | Matrix Fibroblast |
| Csrp1         | 0.61 | 0.00 | 0.00 | 0.36 | 0.16 | 11 | Matrix Fibroblast |
| Rps3a3        | 0.38 | 0.00 | 0.00 | 0.90 | 0.77 | 11 | Matrix Fibroblast |
| Rock2         | 0.72 | 0.00 | 0.00 | 0.52 | 0.32 | 11 | Matrix Fibroblast |
| Rpl35a        | 0.36 | 0.00 | 0.00 | 0.91 | 0.79 | 11 | Matrix Fibroblast |
| Sh3bgrl       | 0.46 | 0.00 | 0.00 | 0.68 | 0.44 | 11 | Matrix Fibroblast |
| Rps15         | 0.38 | 0.00 | 0.00 | 0.91 | 0.78 | 11 | Matrix Fibroblast |
| Gm7589        | 0.44 | 0.00 | 0.00 | 0.81 | 0.65 | 11 | Matrix Fibroblast |
| Rps3a2        | 0.34 | 0.00 | 0.00 | 0.93 | 0.82 | 11 | Matrix Fibroblast |
| Ier2          | 0.76 | 0.00 | 0.00 | 0.45 | 0.25 | 11 | Matrix Fibroblast |
| Rps18-ps3     | 0.46 | 0.00 | 0.00 | 0.75 | 0.55 | 11 | Matrix Fibroblast |
| Ptms          | 0.49 | 0.00 | 0.00 | 0.62 | 0.39 | 11 | Matrix Fibroblast |
| Gm6133        | 0.50 | 0.00 | 0.00 | 0.56 | 0.33 | 11 | Matrix Fibroblast |
| Btg1          | 0.55 | 0.00 | 0.00 | 0.49 | 0.28 | 11 | Matrix Fibroblast |
| Adamts2       | 0.44 | 0.00 | 0.00 | 0.26 | 0.10 | 11 | Matrix Fibroblast |
| Gm5428        | 0.36 | 0.00 | 0.00 | 0.91 | 0.78 | 11 | Matrix Fibroblast |
| Rps13         | 0.40 | 0.00 | 0.00 | 0.82 | 0.64 | 11 | Matrix Fibroblast |
| Gm22426       | 0.47 | 0.00 | 0.00 | 0.70 | 0.48 | 11 | Matrix Fibroblast |
| Mef2a         | 0.60 | 0.00 | 0.00 | 0.56 | 0.36 | 11 | Matrix Fibroblast |
| Rps12-ps3     | 0.35 | 0.00 | 0.00 | 0.91 | 0.78 | 11 | Matrix Fibroblast |
| Rpl32         | 0.31 | 0.00 | 0.00 | 0.95 | 0.84 | 11 | Matrix Fibroblast |
| Luc7l2        | 0.59 | 0.00 | 0.00 | 0.58 | 0.39 | 11 | Matrix Fibroblast |
| Rps18         | 0.41 | 0.00 | 0.00 | 0.83 | 0.65 | 11 | Matrix Fibroblast |
| Fgfr1         | 0.57 | 0.00 | 0.00 | 0.26 | 0.10 | 11 | Matrix Fibroblast |
| Bnip3l        | 0.61 | 0.00 | 0.00 | 0.56 | 0.36 | 11 | Matrix Fibroblast |
| Myh10         | 0.43 | 0.00 | 0.00 | 0.44 | 0.22 | 11 | Matrix Fibroblast |
| Ezh2          | 0.67 | 0.00 | 0.00 | 0.36 | 0.18 | 11 | Matrix Fibroblast |
| Gm26300       | 0.47 | 0.00 | 0.00 | 0.59 | 0.37 | 11 | Matrix Fibroblast |
| Rpl18a        | 0.31 | 0.00 | 0.00 | 0.92 | 0.82 | 11 | Matrix Fibroblast |
| Rplp2         | 0.33 | 0.00 | 0.00 | 0.92 | 0.81 | 11 | Matrix Fibroblast |
| Klf6          | 0.55 | 0.00 | 0.00 | 0.56 | 0.35 | 11 | Matrix Fibroblast |
| Wbp5          | 0.59 | 0.00 | 0.00 | 0.66 | 0.47 | 11 | Matrix Fibroblast |
| Rpl30         | 0.45 | 0.00 | 0.00 | 0.74 | 0.58 | 11 | Matrix Fibroblast |
| Gm9493        | 0.34 | 0.00 | 0.00 | 0.89 | 0.74 | 11 | Matrix Fibroblast |
| Snhg1         | 0.63 | 0.00 | 0.00 | 0.31 | 0.15 | 11 | Matrix Fibroblast |

|          |      |      |      |      |      |    |                   |
|----------|------|------|------|------|------|----|-------------------|
| Eif4ebp1 | 0.58 | 0.00 | 0.00 | 0.29 | 0.13 | 11 | Matrix Fibroblast |
| Rps12    | 0.37 | 0.00 | 0.00 | 0.84 | 0.68 | 11 | Matrix Fibroblast |
| Rpl26    | 0.34 | 0.00 | 0.00 | 0.90 | 0.81 | 11 | Matrix Fibroblast |
| Nfkbia   | 0.47 | 0.00 | 0.00 | 0.58 | 0.37 | 11 | Matrix Fibroblast |
| Rps10    | 0.37 | 0.00 | 0.00 | 0.85 | 0.70 | 11 | Matrix Fibroblast |
| Rpl28    | 0.42 | 0.00 | 0.00 | 0.72 | 0.53 | 11 | Matrix Fibroblast |
| Gm3940   | 0.48 | 0.00 | 0.00 | 0.56 | 0.35 | 11 | Matrix Fibroblast |
| Rpl11    | 0.37 | 0.00 | 0.00 | 0.83 | 0.67 | 11 | Matrix Fibroblast |
| Rpl5     | 0.35 | 0.00 | 0.00 | 0.87 | 0.74 | 11 | Matrix Fibroblast |
| Rpl27a   | 0.32 | 0.00 | 0.00 | 0.91 | 0.78 | 11 | Matrix Fibroblast |
| Rps3a1   | 0.28 | 0.00 | 0.00 | 0.94 | 0.85 | 11 | Matrix Fibroblast |
| Arid5b   | 0.62 | 0.00 | 0.00 | 0.40 | 0.22 | 11 | Matrix Fibroblast |
| Gm7808   | 0.40 | 0.00 | 0.00 | 0.78 | 0.59 | 11 | Matrix Fibroblast |
| Gm10260  | 0.44 | 0.00 | 0.00 | 0.67 | 0.48 | 11 | Matrix Fibroblast |
| Gm15013  | 0.52 | 0.00 | 0.00 | 0.55 | 0.36 | 11 | Matrix Fibroblast |
| Zyx      | 0.49 | 0.00 | 0.00 | 0.37 | 0.19 | 11 | Matrix Fibroblast |
| Smc3     | 0.58 | 0.00 | 0.00 | 0.55 | 0.37 | 11 | Matrix Fibroblast |
| Rin2     | 0.61 | 0.00 | 0.00 | 0.31 | 0.15 | 11 | Matrix Fibroblast |
| Gnas     | 0.36 | 0.00 | 0.00 | 0.82 | 0.66 | 11 | Matrix Fibroblast |
| Gm11808  | 0.30 | 0.00 | 0.00 | 0.90 | 0.77 | 11 | Matrix Fibroblast |
| Hmg5     | 0.80 | 0.00 | 0.00 | 0.43 | 0.26 | 11 | Matrix Fibroblast |
| mt-Cytb  | 0.31 | 0.00 | 0.00 | 0.91 | 0.82 | 11 | Matrix Fibroblast |
| Rps3     | 0.29 | 0.00 | 0.00 | 0.92 | 0.83 | 11 | Matrix Fibroblast |
| Gm10036  | 0.32 | 0.00 | 0.00 | 0.88 | 0.74 | 11 | Matrix Fibroblast |
| Tgfb2    | 0.51 | 0.00 | 0.00 | 0.26 | 0.12 | 11 | Matrix Fibroblast |
| Ifitm3   | 0.31 | 0.00 | 0.00 | 0.62 | 0.39 | 11 | Matrix Fibroblast |
| Rps21    | 0.32 | 0.00 | 0.00 | 0.87 | 0.75 | 11 | Matrix Fibroblast |
| Pnrc1    | 0.51 | 0.00 | 0.00 | 0.36 | 0.20 | 11 | Matrix Fibroblast |
| Prdx5    | 0.39 | 0.00 | 0.00 | 0.51 | 0.32 | 11 | Matrix Fibroblast |
| Rpl6     | 0.28 | 0.00 | 0.00 | 0.95 | 0.87 | 11 | Matrix Fibroblast |
| Rps7     | 0.32 | 0.00 | 0.00 | 0.88 | 0.73 | 11 | Matrix Fibroblast |
| Gm5239   | 0.39 | 0.00 | 0.00 | 0.70 | 0.51 | 11 | Matrix Fibroblast |
| Gm6472   | 0.29 | 0.00 | 0.00 | 0.91 | 0.80 | 11 | Matrix Fibroblast |
| Rpl36a   | 0.39 | 0.00 | 0.00 | 0.76 | 0.62 | 11 | Matrix Fibroblast |
| Epn2     | 0.52 | 0.00 | 0.00 | 0.26 | 0.12 | 11 | Matrix Fibroblast |
| Tax1bp1  | 0.41 | 0.00 | 0.00 | 0.77 | 0.63 | 11 | Matrix Fibroblast |
| Jhdm1d   | 0.55 | 0.00 | 0.00 | 0.31 | 0.15 | 11 | Matrix Fibroblast |
| Gm10288  | 0.29 | 0.00 | 0.00 | 0.90 | 0.78 | 11 | Matrix Fibroblast |
| Eif3e    | 0.47 | 0.00 | 0.00 | 0.56 | 0.40 | 11 | Matrix Fibroblast |
| Ube2e3   | 0.53 | 0.00 | 0.00 | 0.28 | 0.14 | 11 | Matrix Fibroblast |
| Tsc22d1  | 0.48 | 0.00 | 0.00 | 0.51 | 0.33 | 11 | Matrix Fibroblast |
| Pbx1     | 0.55 | 0.00 | 0.00 | 0.35 | 0.20 | 11 | Matrix Fibroblast |
| Gm5093   | 0.39 | 0.00 | 0.00 | 0.64 | 0.46 | 11 | Matrix Fibroblast |

|           |      |      |      |      |      |    |                   |
|-----------|------|------|------|------|------|----|-------------------|
| Rb1cc1    | 0.53 | 0.00 | 0.00 | 0.46 | 0.30 | 11 | Matrix Fibroblast |
| Rps10-ps1 | 0.28 | 0.00 | 0.00 | 0.88 | 0.77 | 11 | Matrix Fibroblast |
| Gpc3      | 0.30 | 0.00 | 0.00 | 0.33 | 0.16 | 11 | Matrix Fibroblast |
| Rpl7      | 0.31 | 0.00 | 0.00 | 0.85 | 0.74 | 11 | Matrix Fibroblast |
| Rpl21-ps6 | 0.39 | 0.00 | 0.00 | 0.61 | 0.43 | 11 | Matrix Fibroblast |
| Tbrg1     | 0.52 | 0.00 | 0.00 | 0.46 | 0.30 | 11 | Matrix Fibroblast |
| Cdkn1a    | 0.35 | 0.00 | 0.00 | 0.32 | 0.16 | 11 | Matrix Fibroblast |
| Nfia      | 0.53 | 0.00 | 0.00 | 0.39 | 0.24 | 11 | Matrix Fibroblast |
| Sqstm1    | 0.48 | 0.00 | 0.00 | 0.47 | 0.31 | 11 | Matrix Fibroblast |
| Eif1      | 0.34 | 0.00 | 0.00 | 0.80 | 0.67 | 11 | Matrix Fibroblast |
| Iscu      | 0.51 | 0.00 | 0.00 | 0.29 | 0.15 | 11 | Matrix Fibroblast |
| Rpl27     | 0.31 | 0.00 | 0.00 | 0.83 | 0.69 | 11 | Matrix Fibroblast |
| Ankrd11   | 0.48 | 0.00 | 0.00 | 0.53 | 0.37 | 11 | Matrix Fibroblast |
| Fkbp9     | 0.47 | 0.00 | 0.00 | 0.27 | 0.14 | 11 | Matrix Fibroblast |
| Luc7l3    | 0.44 | 0.00 | 0.00 | 0.70 | 0.56 | 11 | Matrix Fibroblast |
| Thra      | 0.48 | 0.00 | 0.00 | 0.31 | 0.17 | 11 | Matrix Fibroblast |
| Jund      | 0.51 | 0.00 | 0.00 | 0.42 | 0.27 | 11 | Matrix Fibroblast |
| Srrm1     | 0.49 | 0.00 | 0.00 | 0.61 | 0.48 | 11 | Matrix Fibroblast |
| Gm10126   | 0.38 | 0.00 | 0.00 | 0.56 | 0.39 | 11 | Matrix Fibroblast |
| Tcf25     | 0.44 | 0.00 | 0.00 | 0.64 | 0.51 | 11 | Matrix Fibroblast |
| Gstm1     | 0.45 | 0.00 | 0.00 | 0.28 | 0.15 | 11 | Matrix Fibroblast |
| Rbm39     | 0.32 | 0.00 | 0.00 | 0.81 | 0.71 | 11 | Matrix Fibroblast |
| Celf2     | 0.43 | 0.00 | 0.00 | 0.44 | 0.28 | 11 | Matrix Fibroblast |
| Rpsa      | 0.29 | 0.00 | 0.00 | 0.75 | 0.62 | 11 | Matrix Fibroblast |
| Nisch     | 0.44 | 0.00 | 0.00 | 0.45 | 0.30 | 11 | Matrix Fibroblast |
| Gltscr2   | 0.36 | 0.00 | 0.00 | 0.63 | 0.48 | 11 | Matrix Fibroblast |
| Echs1     | 0.48 | 0.00 | 0.00 | 0.27 | 0.15 | 11 | Matrix Fibroblast |
| Cnn2      | 0.34 | 0.00 | 0.00 | 0.55 | 0.39 | 11 | Matrix Fibroblast |
| Rpl21-ps4 | 0.39 | 0.00 | 0.00 | 0.50 | 0.35 | 11 | Matrix Fibroblast |
| Srrm2     | 0.37 | 0.00 | 0.00 | 0.73 | 0.60 | 11 | Matrix Fibroblast |
| Pdcd4     | 0.44 | 0.00 | 0.00 | 0.36 | 0.22 | 11 | Matrix Fibroblast |
| Arglu1    | 0.42 | 0.00 | 0.00 | 0.55 | 0.42 | 11 | Matrix Fibroblast |
| Kif1b     | 0.44 | 0.00 | 0.00 | 0.37 | 0.23 | 11 | Matrix Fibroblast |
| Gm22761   | 0.43 | 0.00 | 0.00 | 0.29 | 0.17 | 11 | Matrix Fibroblast |
| Nenf      | 0.41 | 0.00 | 0.00 | 0.31 | 0.18 | 11 | Matrix Fibroblast |
| Nktr      | 0.47 | 0.00 | 0.00 | 0.49 | 0.36 | 11 | Matrix Fibroblast |
| Cox7c     | 0.33 | 0.00 | 0.00 | 0.74 | 0.63 | 11 | Matrix Fibroblast |
| Pcbp2     | 0.40 | 0.00 | 0.00 | 0.54 | 0.42 | 11 | Matrix Fibroblast |
| Mbnl2     | 0.37 | 0.00 | 0.00 | 0.48 | 0.34 | 11 | Matrix Fibroblast |
| Sod1      | 0.35 | 0.00 | 0.00 | 0.60 | 0.47 | 11 | Matrix Fibroblast |
| Sdc4      | 0.34 | 0.00 | 0.00 | 0.36 | 0.22 | 11 | Matrix Fibroblast |
| Smc4      | 0.33 | 0.00 | 0.00 | 0.49 | 0.34 | 11 | Matrix Fibroblast |
| Nedd4     | 0.31 | 0.00 | 0.00 | 0.68 | 0.53 | 11 | Matrix Fibroblast |

|               |      |      |      |      |      |    |                   |
|---------------|------|------|------|------|------|----|-------------------|
| Hbp1          | 0.43 | 0.00 | 0.00 | 0.28 | 0.16 | 11 | Matrix Fibroblast |
| Zmym5         | 0.48 | 0.00 | 0.00 | 0.32 | 0.20 | 11 | Matrix Fibroblast |
| Rpl29         | 0.33 | 0.00 | 0.00 | 0.59 | 0.46 | 11 | Matrix Fibroblast |
| Hmgb1         | 0.27 | 0.00 | 0.00 | 0.73 | 0.61 | 11 | Matrix Fibroblast |
| Cirbp         | 0.46 | 0.00 | 0.00 | 0.33 | 0.21 | 11 | Matrix Fibroblast |
| Gm10221       | 0.38 | 0.00 | 0.00 | 0.57 | 0.46 | 11 | Matrix Fibroblast |
| Hnrnp1        | 0.44 | 0.00 | 0.00 | 0.37 | 0.25 | 11 | Matrix Fibroblast |
| Dynlt1a       | 0.41 | 0.00 | 0.00 | 0.34 | 0.22 | 11 | Matrix Fibroblast |
| Btf3          | 0.32 | 0.00 | 0.00 | 0.63 | 0.51 | 11 | Matrix Fibroblast |
| Rbbp7         | 0.41 | 0.00 | 0.00 | 0.38 | 0.26 | 11 | Matrix Fibroblast |
| Ypel3         | 0.35 | 0.00 | 0.00 | 0.32 | 0.20 | 11 | Matrix Fibroblast |
| Atp5l         | 0.37 | 0.00 | 0.00 | 0.54 | 0.44 | 11 | Matrix Fibroblast |
| Prdx6         | 0.28 | 0.00 | 0.00 | 0.40 | 0.27 | 11 | Matrix Fibroblast |
| Lmo4          | 0.35 | 0.00 | 0.00 | 0.38 | 0.26 | 11 | Matrix Fibroblast |
| Gm10923       | 0.37 | 0.00 | 0.00 | 0.33 | 0.21 | 11 | Matrix Fibroblast |
| Rbbp6         | 0.44 | 0.00 | 0.00 | 0.46 | 0.35 | 11 | Matrix Fibroblast |
| Scp2          | 0.36 | 0.00 | 0.00 | 0.45 | 0.32 | 11 | Matrix Fibroblast |
| Pnpla8        | 0.42 | 0.00 | 0.00 | 0.29 | 0.18 | 11 | Matrix Fibroblast |
| Sfrs18        | 0.32 | 0.00 | 0.00 | 0.68 | 0.59 | 11 | Matrix Fibroblast |
| Atp5l-ps1     | 0.41 | 0.00 | 0.00 | 0.39 | 0.27 | 11 | Matrix Fibroblast |
| Igfbp4        | 0.29 | 0.00 | 0.00 | 0.38 | 0.25 | 11 | Matrix Fibroblast |
| Gm10020       | 0.26 | 0.00 | 0.00 | 0.63 | 0.51 | 11 | Matrix Fibroblast |
| Zfp326        | 0.42 | 0.00 | 0.00 | 0.34 | 0.24 | 11 | Matrix Fibroblast |
| Socs2         | 0.28 | 0.00 | 0.00 | 0.47 | 0.34 | 11 | Matrix Fibroblast |
| Tmem254b      | 0.38 | 0.00 | 0.00 | 0.30 | 0.19 | 11 | Matrix Fibroblast |
| Ythdc1        | 0.36 | 0.00 | 0.00 | 0.54 | 0.43 | 11 | Matrix Fibroblast |
| Tsix          | 0.44 | 0.00 | 0.00 | 0.28 | 0.18 | 11 | Matrix Fibroblast |
| Eif3f         | 0.32 | 0.00 | 0.00 | 0.48 | 0.36 | 11 | Matrix Fibroblast |
| Dynlt1c       | 0.38 | 0.00 | 0.00 | 0.37 | 0.27 | 11 | Matrix Fibroblast |
| Smc5          | 0.40 | 0.00 | 0.00 | 0.26 | 0.16 | 11 | Matrix Fibroblast |
| Ccnl1         | 0.35 | 0.00 | 0.00 | 0.44 | 0.33 | 11 | Matrix Fibroblast |
| Dnajc3        | 0.40 | 0.00 | 0.00 | 0.37 | 0.27 | 11 | Matrix Fibroblast |
| Hip1          | 0.32 | 0.00 | 0.00 | 0.25 | 0.16 | 11 | Matrix Fibroblast |
| Sfr1          | 0.35 | 0.00 | 0.00 | 0.44 | 0.33 | 11 | Matrix Fibroblast |
| Ccnl2         | 0.36 | 0.00 | 0.00 | 0.34 | 0.24 | 11 | Matrix Fibroblast |
| 4931406P16Rik | 0.28 | 0.00 | 0.00 | 0.28 | 0.18 | 11 | Matrix Fibroblast |
| Gm17669       | 0.33 | 0.00 | 0.00 | 0.31 | 0.22 | 11 | Matrix Fibroblast |
| Rap2a         | 0.28 | 0.00 | 0.00 | 0.25 | 0.16 | 11 | Matrix Fibroblast |
| Dynlt1b       | 0.32 | 0.00 | 0.00 | 0.35 | 0.25 | 11 | Matrix Fibroblast |
| Ilk           | 0.32 | 0.00 | 0.00 | 0.33 | 0.23 | 11 | Matrix Fibroblast |
| Gm10709       | 0.35 | 0.00 | 0.00 | 0.37 | 0.27 | 11 | Matrix Fibroblast |
| Ccar1         | 0.39 | 0.00 | 0.00 | 0.42 | 0.33 | 11 | Matrix Fibroblast |
| Lamp2         | 0.32 | 0.00 | 0.00 | 0.36 | 0.26 | 11 | Matrix Fibroblast |

|               |      |      |      |      |      |    |                   |
|---------------|------|------|------|------|------|----|-------------------|
| Kmt2e         | 0.32 | 0.00 | 0.00 | 0.52 | 0.42 | 11 | Matrix Fibroblast |
| Tnrc6a        | 0.36 | 0.00 | 0.00 | 0.35 | 0.26 | 11 | Matrix Fibroblast |
| 1500012F01Rik | 0.32 | 0.00 | 0.00 | 0.40 | 0.30 | 11 | Matrix Fibroblast |
| Rpl7a-ps5     | 0.29 | 0.00 | 0.00 | 0.46 | 0.37 | 11 | Matrix Fibroblast |
| Stt3b         | 0.31 | 0.00 | 0.00 | 0.44 | 0.34 | 11 | Matrix Fibroblast |
| Eif5b         | 0.32 | 0.00 | 0.00 | 0.59 | 0.51 | 11 | Matrix Fibroblast |
| Ankrd12       | 0.45 | 0.00 | 0.00 | 0.35 | 0.27 | 11 | Matrix Fibroblast |
| Tmem254c      | 0.34 | 0.00 | 0.00 | 0.27 | 0.18 | 11 | Matrix Fibroblast |
| Tmem254a      | 0.34 | 0.00 | 0.00 | 0.28 | 0.19 | 11 | Matrix Fibroblast |
| Atf4          | 0.35 | 0.00 | 0.00 | 0.36 | 0.28 | 11 | Matrix Fibroblast |
| Dynlt1f       | 0.32 | 0.00 | 0.00 | 0.33 | 0.24 | 11 | Matrix Fibroblast |
| Gm20091       | 0.33 | 0.00 | 0.00 | 0.31 | 0.22 | 11 | Matrix Fibroblast |
| Pnn           | 0.27 | 0.00 | 0.00 | 0.61 | 0.54 | 11 | Matrix Fibroblast |
| Ash1l         | 0.37 | 0.00 | 0.00 | 0.38 | 0.29 | 11 | Matrix Fibroblast |
| Use1          | 0.32 | 0.00 | 0.00 | 0.36 | 0.27 | 11 | Matrix Fibroblast |
| Gm24276       | 0.30 | 0.00 | 0.00 | 0.31 | 0.22 | 11 | Matrix Fibroblast |
| Psmc1         | 0.33 | 0.00 | 0.00 | 0.40 | 0.31 | 11 | Matrix Fibroblast |
| Zfp91         | 0.33 | 0.00 | 0.00 | 0.39 | 0.30 | 11 | Matrix Fibroblast |
| Gm5619        | 0.28 | 0.00 | 0.00 | 0.42 | 0.33 | 11 | Matrix Fibroblast |
| Cul1          | 0.36 | 0.00 | 0.00 | 0.26 | 0.18 | 11 | Matrix Fibroblast |
| Ppil4         | 0.32 | 0.00 | 0.00 | 0.27 | 0.19 | 11 | Matrix Fibroblast |
| Hint1         | 0.27 | 0.00 | 0.00 | 0.54 | 0.46 | 11 | Matrix Fibroblast |
| Map1lc3a      | 0.26 | 0.00 | 0.00 | 0.28 | 0.20 | 11 | Matrix Fibroblast |
| H2afv         | 0.27 | 0.00 | 0.00 | 0.37 | 0.28 | 11 | Matrix Fibroblast |
| Matr3         | 0.33 | 0.00 | 0.00 | 0.48 | 0.41 | 11 | Matrix Fibroblast |
| Vezf1         | 0.30 | 0.00 | 0.00 | 0.32 | 0.24 | 11 | Matrix Fibroblast |
| Idh2          | 0.31 | 0.00 | 0.00 | 0.27 | 0.19 | 11 | Matrix Fibroblast |
| Prpf4b        | 0.29 | 0.00 | 0.00 | 0.52 | 0.46 | 11 | Matrix Fibroblast |
| Gm8226        | 0.25 | 0.00 | 0.00 | 0.48 | 0.40 | 11 | Matrix Fibroblast |
| Ube2b         | 0.26 | 0.00 | 0.00 | 0.44 | 0.36 | 11 | Matrix Fibroblast |
| Eea1          | 0.32 | 0.00 | 0.00 | 0.28 | 0.21 | 11 | Matrix Fibroblast |
| Nipbl         | 0.30 | 0.00 | 0.00 | 0.47 | 0.39 | 11 | Matrix Fibroblast |
| Arid4a        | 0.35 | 0.00 | 0.00 | 0.37 | 0.29 | 11 | Matrix Fibroblast |
| Srsf10        | 0.30 | 0.00 | 0.00 | 0.33 | 0.25 | 11 | Matrix Fibroblast |
| Gm25593       | 0.30 | 0.00 | 0.00 | 0.28 | 0.21 | 11 | Matrix Fibroblast |
| Ppig          | 0.32 | 0.00 | 0.00 | 0.46 | 0.40 | 11 | Matrix Fibroblast |
| Ndufa6        | 0.26 | 0.00 | 0.00 | 0.49 | 0.42 | 11 | Matrix Fibroblast |
| Ewsr1         | 0.28 | 0.00 | 0.00 | 0.34 | 0.27 | 11 | Matrix Fibroblast |
| Bclaf1        | 0.26 | 0.00 | 0.00 | 0.48 | 0.41 | 11 | Matrix Fibroblast |
| Stt3b         | 0.31 | 0.00 | 0.00 | 0.25 | 0.19 | 11 | Matrix Fibroblast |
| Prpf38b       | 0.25 | 0.00 | 0.00 | 0.57 | 0.50 | 11 | Matrix Fibroblast |
| Eif4a1        | 0.26 | 0.00 | 0.00 | 0.42 | 0.36 | 11 | Matrix Fibroblast |
| Arhgap5       | 0.29 | 0.00 | 0.00 | 0.25 | 0.19 | 11 | Matrix Fibroblast |

|          |      |      |      |      |      |    |                   |
|----------|------|------|------|------|------|----|-------------------|
| Zfr      | 0.32 | 0.00 | 0.00 | 0.35 | 0.29 | 11 | Matrix Fibroblast |
| Fxr1     | 0.31 | 0.00 | 0.00 | 0.30 | 0.23 | 11 | Matrix Fibroblast |
| Brd3     | 0.29 | 0.00 | 0.00 | 0.32 | 0.25 | 11 | Matrix Fibroblast |
| Cast     | 0.30 | 0.00 | 0.00 | 0.26 | 0.20 | 11 | Matrix Fibroblast |
| Ralbp1   | 0.26 | 0.00 | 0.00 | 0.39 | 0.33 | 11 | Matrix Fibroblast |
| Rtf1     | 0.29 | 0.00 | 0.00 | 0.40 | 0.33 | 11 | Matrix Fibroblast |
| Pdcd5    | 0.32 | 0.00 | 0.00 | 0.34 | 0.28 | 11 | Matrix Fibroblast |
| Nsa2     | 0.28 | 0.00 | 0.00 | 0.36 | 0.30 | 11 | Matrix Fibroblast |
| Tbl1x    | 0.28 | 0.00 | 0.00 | 0.31 | 0.25 | 11 | Matrix Fibroblast |
| Zcchc11  | 0.26 | 0.00 | 0.00 | 0.27 | 0.21 | 11 | Matrix Fibroblast |
| Ggnbp2   | 0.26 | 0.00 | 0.00 | 0.34 | 0.28 | 11 | Matrix Fibroblast |
| Mier1    | 0.25 | 0.00 | 0.00 | 0.30 | 0.24 | 11 | Matrix Fibroblast |
| Snrpb2   | 0.29 | 0.00 | 0.00 | 0.30 | 0.24 | 11 | Matrix Fibroblast |
| Phf3     | 0.27 | 0.00 | 0.01 | 0.30 | 0.25 | 11 | Matrix Fibroblast |
| Smap1    | 0.27 | 0.00 | 0.01 | 0.25 | 0.21 | 11 | Matrix Fibroblast |
| Clip1    | 0.28 | 0.00 | 0.02 | 0.25 | 0.21 | 11 | Matrix Fibroblast |
| Esf1     | 0.30 | 0.00 | 0.04 | 0.28 | 0.24 | 11 | Matrix Fibroblast |
| Ctss     | 2.69 | 0.00 | 0.00 | 0.94 | 0.13 | 12 | Macrophage        |
| Ccl6     | 2.68 | 0.00 | 0.00 | 0.73 | 0.08 | 12 | Macrophage        |
| Psap     | 2.06 | 0.00 | 0.00 | 0.93 | 0.34 | 12 | Macrophage        |
| Lgals3   | 2.01 | 0.00 | 0.00 | 0.81 | 0.13 | 12 | Macrophage        |
| Bcl2a1d  | 1.99 | 0.00 | 0.00 | 0.72 | 0.06 | 12 | Macrophage        |
| Cybb     | 1.92 | 0.00 | 0.00 | 0.70 | 0.08 | 12 | Macrophage        |
| Mpeg1    | 1.90 | 0.00 | 0.00 | 0.72 | 0.05 | 12 | Macrophage        |
| Bcl2a1b  | 1.87 | 0.00 | 0.00 | 0.65 | 0.05 | 12 | Macrophage        |
| Bcl2a1a  | 1.81 | 0.00 | 0.00 | 0.63 | 0.05 | 12 | Macrophage        |
| Ctsd     | 1.78 | 0.00 | 0.00 | 0.78 | 0.23 | 12 | Macrophage        |
| Plek     | 1.59 | 0.00 | 0.00 | 0.56 | 0.05 | 12 | Macrophage        |
| Cebpb    | 1.59 | 0.00 | 0.00 | 0.48 | 0.08 | 12 | Macrophage        |
| Fth1     | 1.58 | 0.00 | 0.00 | 0.95 | 0.81 | 12 | Macrophage        |
| Atp6v0d2 | 1.53 | 0.00 | 0.00 | 0.28 | 0.01 | 12 | Macrophage        |
| Fcer1g   | 1.52 | 0.00 | 0.00 | 0.70 | 0.10 | 12 | Macrophage        |
| Tyrobp   | 1.48 | 0.00 | 0.00 | 0.73 | 0.10 | 12 | Macrophage        |
| Cd300lf  | 1.47 | 0.00 | 0.00 | 0.46 | 0.03 | 12 | Macrophage        |
| Hebp1    | 1.45 | 0.00 | 0.00 | 0.37 | 0.03 | 12 | Macrophage        |
| Ccr2     | 1.45 | 0.00 | 0.00 | 0.39 | 0.06 | 12 | Macrophage        |
| Cd44     | 1.45 | 0.00 | 0.00 | 0.68 | 0.18 | 12 | Macrophage        |
| Laptm5   | 1.43 | 0.00 | 0.00 | 0.71 | 0.12 | 12 | Macrophage        |
| Cyba     | 1.42 | 0.00 | 0.00 | 0.81 | 0.28 | 12 | Macrophage        |
| Tnfaip2  | 1.42 | 0.00 | 0.00 | 0.42 | 0.04 | 12 | Macrophage        |
| Ear2     | 1.40 | 0.00 | 0.00 | 0.32 | 0.02 | 12 | Macrophage        |
| Mrc1     | 1.38 | 0.00 | 0.00 | 0.35 | 0.02 | 12 | Macrophage        |
| Sirpa    | 1.36 | 0.00 | 0.00 | 0.49 | 0.05 | 12 | Macrophage        |

|               |      |      |      |      |      |    |            |
|---------------|------|------|------|------|------|----|------------|
| Plin2         | 1.34 | 0.00 | 0.00 | 0.54 | 0.12 | 12 | Macrophage |
| Lilrb4        | 1.33 | 0.00 | 0.00 | 0.47 | 0.05 | 12 | Macrophage |
| Pygl          | 1.33 | 0.00 | 0.00 | 0.51 | 0.10 | 12 | Macrophage |
| Lcp1          | 1.32 | 0.00 | 0.00 | 0.72 | 0.21 | 12 | Macrophage |
| Snx10         | 1.28 | 0.00 | 0.00 | 0.44 | 0.03 | 12 | Macrophage |
| Clec4n        | 1.26 | 0.00 | 0.00 | 0.34 | 0.01 | 12 | Macrophage |
| Baz1a         | 1.25 | 0.00 | 0.00 | 0.51 | 0.12 | 12 | Macrophage |
| Gda           | 1.24 | 0.00 | 0.00 | 0.42 | 0.04 | 12 | Macrophage |
| Alox5ap       | 1.24 | 0.00 | 0.00 | 0.58 | 0.08 | 12 | Macrophage |
| 1810033B17Rik | 1.21 | 0.00 | 0.00 | 0.39 | 0.03 | 12 | Macrophage |
| Ctsc          | 1.20 | 0.00 | 0.00 | 0.63 | 0.18 | 12 | Macrophage |
| Fcgr3         | 1.20 | 0.00 | 0.00 | 0.44 | 0.03 | 12 | Macrophage |
| Fpr2          | 1.18 | 0.00 | 0.00 | 0.30 | 0.02 | 12 | Macrophage |
| Csf2rb        | 1.17 | 0.00 | 0.00 | 0.41 | 0.03 | 12 | Macrophage |
| Ccr1          | 1.16 | 0.00 | 0.00 | 0.39 | 0.02 | 12 | Macrophage |
| Gp49a         | 1.14 | 0.00 | 0.00 | 0.39 | 0.04 | 12 | Macrophage |
| Abcg1         | 1.14 | 0.00 | 0.00 | 0.34 | 0.05 | 12 | Macrophage |
| Slfn2         | 1.13 | 0.00 | 0.00 | 0.57 | 0.12 | 12 | Macrophage |
| Trf           | 1.10 | 0.00 | 0.00 | 0.43 | 0.09 | 12 | Macrophage |
| 4930506M07Rik | 1.10 | 0.00 | 0.00 | 0.37 | 0.04 | 12 | Macrophage |
| Lyz2          | 1.09 | 0.00 | 0.00 | 0.85 | 0.25 | 12 | Macrophage |
| Msrb1         | 1.09 | 0.00 | 0.00 | 0.55 | 0.13 | 12 | Macrophage |
| Clec4a2       | 1.05 | 0.00 | 0.00 | 0.31 | 0.02 | 12 | Macrophage |
| Fam49b        | 1.04 | 0.00 | 0.00 | 0.45 | 0.10 | 12 | Macrophage |
| Spi1          | 1.04 | 0.00 | 0.00 | 0.44 | 0.05 | 12 | Macrophage |
| Ms4a6c        | 1.03 | 0.00 | 0.00 | 0.37 | 0.05 | 12 | Macrophage |
| Al662270      | 1.03 | 0.00 | 0.00 | 0.40 | 0.06 | 12 | Macrophage |
| Sirpb1c       | 1.02 | 0.00 | 0.00 | 0.34 | 0.03 | 12 | Macrophage |
| Cd84          | 1.01 | 0.00 | 0.00 | 0.36 | 0.04 | 12 | Macrophage |
| Il18          | 1.01 | 0.00 | 0.00 | 0.25 | 0.01 | 12 | Macrophage |
| Cfp           | 1.01 | 0.00 | 0.00 | 0.29 | 0.04 | 12 | Macrophage |
| Coro2a        | 1.00 | 0.00 | 0.00 | 0.35 | 0.06 | 12 | Macrophage |
| Fcgr2b        | 0.99 | 0.00 | 0.00 | 0.30 | 0.03 | 12 | Macrophage |
| Tmsb4x        | 0.98 | 0.00 | 0.00 | 0.99 | 0.88 | 12 | Macrophage |
| Ccl9          | 0.98 | 0.00 | 0.00 | 0.29 | 0.02 | 12 | Macrophage |
| Slc15a3       | 0.97 | 0.00 | 0.00 | 0.31 | 0.02 | 12 | Macrophage |
| Apbb1ip       | 0.96 | 0.00 | 0.00 | 0.45 | 0.08 | 12 | Macrophage |
| Ncf1          | 0.96 | 0.00 | 0.00 | 0.39 | 0.06 | 12 | Macrophage |
| Itgb2         | 0.95 | 0.00 | 0.00 | 0.33 | 0.04 | 12 | Macrophage |
| Arhgap30      | 0.94 | 0.00 | 0.00 | 0.46 | 0.09 | 12 | Macrophage |
| Sh3bp2        | 0.89 | 0.00 | 0.00 | 0.26 | 0.03 | 12 | Macrophage |
| Csf2ra        | 0.88 | 0.00 | 0.00 | 0.34 | 0.05 | 12 | Macrophage |
| Axl           | 0.87 | 0.00 | 0.00 | 0.28 | 0.03 | 12 | Macrophage |

|          |      |      |      |      |      |    |            |
|----------|------|------|------|------|------|----|------------|
| Clec4a3  | 0.87 | 0.00 | 0.00 | 0.31 | 0.03 | 12 | Macrophage |
| Pld4     | 0.83 | 0.00 | 0.00 | 0.32 | 0.05 | 12 | Macrophage |
| Sirpb1b  | 0.82 | 0.00 | 0.00 | 0.28 | 0.02 | 12 | Macrophage |
| Cd68     | 0.81 | 0.00 | 0.00 | 0.28 | 0.02 | 12 | Macrophage |
| AF251705 | 0.80 | 0.00 | 0.00 | 0.26 | 0.02 | 12 | Macrophage |
| Ncf2     | 0.77 | 0.00 | 0.00 | 0.28 | 0.04 | 12 | Macrophage |
| Igsf6    | 0.76 | 0.00 | 0.00 | 0.28 | 0.04 | 12 | Macrophage |
| Klhdc4   | 1.12 | 0.00 | 0.00 | 0.26 | 0.04 | 12 | Macrophage |
| Cd302    | 1.07 | 0.00 | 0.00 | 0.52 | 0.13 | 12 | Macrophage |
| Cstb     | 1.74 | 0.00 | 0.00 | 0.67 | 0.26 | 12 | Macrophage |
| Hcls1    | 0.81 | 0.00 | 0.00 | 0.37 | 0.07 | 12 | Macrophage |
| Sla      | 0.80 | 0.00 | 0.00 | 0.26 | 0.04 | 12 | Macrophage |
| Cd300a   | 0.70 | 0.00 | 0.00 | 0.25 | 0.03 | 12 | Macrophage |
| Cotl1    | 1.05 | 0.00 | 0.00 | 0.57 | 0.16 | 12 | Macrophage |
| Rassf4   | 0.71 | 0.00 | 0.00 | 0.26 | 0.03 | 12 | Macrophage |
| Cyth4    | 0.74 | 0.00 | 0.00 | 0.27 | 0.04 | 12 | Macrophage |
| Naaa     | 0.81 | 0.00 | 0.00 | 0.26 | 0.04 | 12 | Macrophage |
| Gm10116  | 1.24 | 0.00 | 0.00 | 0.88 | 0.62 | 12 | Macrophage |
| Ptprc    | 0.74 | 0.00 | 0.00 | 0.53 | 0.14 | 12 | Macrophage |
| Gm13139  | 0.83 | 0.00 | 0.00 | 0.34 | 0.06 | 12 | Macrophage |
| Aprt     | 1.04 | 0.00 | 0.00 | 0.53 | 0.16 | 12 | Macrophage |
| Ifi204   | 0.87 | 0.00 | 0.00 | 0.28 | 0.05 | 12 | Macrophage |
| Abhd12   | 0.77 | 0.00 | 0.00 | 0.26 | 0.04 | 12 | Macrophage |
| Ptpn6    | 0.81 | 0.00 | 0.00 | 0.37 | 0.08 | 12 | Macrophage |
| Ifi30    | 0.91 | 0.00 | 0.00 | 0.42 | 0.10 | 12 | Macrophage |
| Ftl1     | 1.25 | 0.00 | 0.00 | 0.84 | 0.56 | 12 | Macrophage |
| Gns      | 1.00 | 0.00 | 0.00 | 0.45 | 0.12 | 12 | Macrophage |
| Efhd2    | 0.89 | 0.00 | 0.00 | 0.37 | 0.08 | 12 | Macrophage |
| Pla2g7   | 1.02 | 0.00 | 0.00 | 0.29 | 0.05 | 12 | Macrophage |
| Gm13248  | 0.77 | 0.00 | 0.00 | 0.29 | 0.05 | 12 | Macrophage |
| Gsr      | 0.96 | 0.00 | 0.00 | 0.36 | 0.08 | 12 | Macrophage |
| Tgfb1    | 0.35 | 0.00 | 0.00 | 0.60 | 0.18 | 12 | Macrophage |
| Ctsz     | 1.07 | 0.00 | 0.00 | 0.47 | 0.14 | 12 | Macrophage |
| Cd52     | 0.80 | 0.00 | 0.00 | 0.60 | 0.19 | 12 | Macrophage |
| Ctsb     | 1.31 | 0.00 | 0.00 | 0.64 | 0.27 | 12 | Macrophage |
| Fxyd5    | 0.86 | 0.00 | 0.00 | 0.54 | 0.17 | 12 | Macrophage |
| Mnda     | 0.98 | 0.00 | 0.00 | 0.28 | 0.05 | 12 | Macrophage |
| Lyz1     | 0.57 | 0.00 | 0.00 | 0.58 | 0.18 | 12 | Macrophage |
| Dab2     | 0.81 | 0.00 | 0.00 | 0.32 | 0.07 | 12 | Macrophage |
| Cd53     | 0.73 | 0.00 | 0.00 | 0.37 | 0.08 | 12 | Macrophage |
| Atp6v0c  | 1.02 | 0.00 | 0.00 | 0.61 | 0.24 | 12 | Macrophage |
| Zfp36l2  | 0.92 | 0.00 | 0.00 | 0.40 | 0.11 | 12 | Macrophage |
| Mt1      | 1.04 | 0.00 | 0.00 | 0.49 | 0.15 | 12 | Macrophage |

|           |      |      |      |      |      |    |            |
|-----------|------|------|------|------|------|----|------------|
| Gpx1      | 0.89 | 0.00 | 0.00 | 0.78 | 0.42 | 12 | Macrophage |
| Pycard    | 0.80 | 0.00 | 0.00 | 0.35 | 0.08 | 12 | Macrophage |
| Pld3      | 0.94 | 0.00 | 0.00 | 0.28 | 0.06 | 12 | Macrophage |
| Taldo1    | 0.96 | 0.00 | 0.00 | 0.62 | 0.25 | 12 | Macrophage |
| Sat1      | 0.98 | 0.00 | 0.00 | 0.69 | 0.32 | 12 | Macrophage |
| Lst1      | 0.73 | 0.00 | 0.00 | 0.29 | 0.06 | 12 | Macrophage |
| Unc93b1   | 0.72 | 0.00 | 0.00 | 0.31 | 0.07 | 12 | Macrophage |
| Lrp1      | 0.83 | 0.00 | 0.00 | 0.39 | 0.11 | 12 | Macrophage |
| Hexa      | 0.78 | 0.00 | 0.00 | 0.31 | 0.07 | 12 | Macrophage |
| Lpl       | 1.53 | 0.00 | 0.00 | 0.42 | 0.14 | 12 | Macrophage |
| Nceh1     | 0.86 | 0.00 | 0.00 | 0.28 | 0.06 | 12 | Macrophage |
| Gm4070    | 0.85 | 0.00 | 0.00 | 0.40 | 0.11 | 12 | Macrophage |
| Gvin1     | 0.86 | 0.00 | 0.00 | 0.39 | 0.11 | 12 | Macrophage |
| Tpd52     | 0.77 | 0.00 | 0.00 | 0.37 | 0.10 | 12 | Macrophage |
| Ctsa      | 0.84 | 0.00 | 0.00 | 0.41 | 0.12 | 12 | Macrophage |
| Ilph      | 0.99 | 0.00 | 0.00 | 0.67 | 0.33 | 12 | Macrophage |
| M6pr      | 0.92 | 0.00 | 0.00 | 0.56 | 0.22 | 12 | Macrophage |
| Pabpc1    | 0.61 | 0.00 | 0.00 | 0.94 | 0.80 | 12 | Macrophage |
| Hmga1-rs1 | 0.74 | 0.00 | 0.00 | 0.29 | 0.07 | 12 | Macrophage |
| Creg1     | 0.90 | 0.00 | 0.00 | 0.47 | 0.16 | 12 | Macrophage |
| Hmga1     | 0.71 | 0.00 | 0.00 | 0.29 | 0.07 | 12 | Macrophage |
| Arhgdib   | 0.60 | 0.00 | 0.00 | 0.47 | 0.15 | 12 | Macrophage |
| Arpc5     | 0.73 | 0.00 | 0.00 | 0.84 | 0.56 | 12 | Macrophage |
| Ubash3b   | 0.65 | 0.00 | 0.00 | 0.27 | 0.06 | 12 | Macrophage |
| Hexb      | 0.68 | 0.00 | 0.00 | 0.28 | 0.07 | 12 | Macrophage |
| Tcf7l2    | 0.80 | 0.00 | 0.00 | 0.30 | 0.08 | 12 | Macrophage |
| Arrb2     | 0.61 | 0.00 | 0.00 | 0.26 | 0.06 | 12 | Macrophage |
| Prdx5     | 0.94 | 0.00 | 0.00 | 0.63 | 0.31 | 12 | Macrophage |
| Grn       | 0.80 | 0.00 | 0.00 | 0.39 | 0.13 | 12 | Macrophage |
| Fermt3    | 0.57 | 0.00 | 0.00 | 0.25 | 0.06 | 12 | Macrophage |
| Btg1      | 0.88 | 0.00 | 0.00 | 0.59 | 0.28 | 12 | Macrophage |
| Fam96a    | 0.80 | 0.00 | 0.00 | 0.41 | 0.14 | 12 | Macrophage |
| Apoe      | 1.55 | 0.00 | 0.00 | 0.57 | 0.28 | 12 | Macrophage |
| Coro1a    | 0.55 | 0.00 | 0.00 | 0.34 | 0.09 | 12 | Macrophage |
| mt-Rnr1   | 1.34 | 0.00 | 0.00 | 0.72 | 0.46 | 12 | Macrophage |
| Pgd       | 0.76 | 0.00 | 0.00 | 0.34 | 0.10 | 12 | Macrophage |
| Atp6v1b2  | 0.85 | 0.00 | 0.00 | 0.37 | 0.12 | 12 | Macrophage |
| Gm2a      | 0.64 | 0.00 | 0.00 | 0.31 | 0.08 | 12 | Macrophage |
| Fos       | 0.84 | 0.00 | 0.00 | 0.48 | 0.18 | 12 | Macrophage |
| Rps27a    | 0.61 | 0.00 | 0.00 | 0.91 | 0.76 | 12 | Macrophage |
| Shfm1     | 0.71 | 0.00 | 0.00 | 0.86 | 0.64 | 12 | Macrophage |
| Actr2     | 0.79 | 0.00 | 0.00 | 0.57 | 0.27 | 12 | Macrophage |
| Runx1     | 0.68 | 0.00 | 0.00 | 0.26 | 0.07 | 12 | Macrophage |

|           |      |      |      |      |      |    |            |
|-----------|------|------|------|------|------|----|------------|
| Actb      | 0.48 | 0.00 | 0.00 | 1.00 | 0.98 | 12 | Macrophage |
| Prkcd     | 0.68 | 0.00 | 0.00 | 0.34 | 0.10 | 12 | Macrophage |
| Cd9       | 1.09 | 0.00 | 0.00 | 0.62 | 0.34 | 12 | Macrophage |
| Mir692-2a | 0.92 | 0.00 | 0.00 | 0.46 | 0.19 | 12 | Macrophage |
| Adipor2   | 0.84 | 0.00 | 0.00 | 0.34 | 0.11 | 12 | Macrophage |
| Ppt1      | 0.70 | 0.00 | 0.00 | 0.36 | 0.12 | 12 | Macrophage |
| Atp6v1e1  | 0.88 | 0.00 | 0.00 | 0.53 | 0.25 | 12 | Macrophage |
| Samhd1    | 0.67 | 0.00 | 0.00 | 0.47 | 0.19 | 12 | Macrophage |
| Tgfb1     | 0.71 | 0.00 | 0.00 | 0.26 | 0.07 | 12 | Macrophage |
| Psm10     | 0.65 | 0.00 | 0.00 | 0.35 | 0.12 | 12 | Macrophage |
| Mcl1      | 0.78 | 0.00 | 0.00 | 0.49 | 0.22 | 12 | Macrophage |
| Iqg1      | 0.75 | 0.00 | 0.00 | 0.71 | 0.44 | 12 | Macrophage |
| Gm22774   | 0.82 | 0.00 | 0.00 | 0.41 | 0.16 | 12 | Macrophage |
| Wdr89     | 0.44 | 0.00 | 0.00 | 0.97 | 0.89 | 12 | Macrophage |
| Gm26445   | 0.84 | 0.00 | 0.00 | 0.38 | 0.15 | 12 | Macrophage |
| Reep5     | 0.79 | 0.00 | 0.00 | 0.50 | 0.23 | 12 | Macrophage |
| Capz2     | 0.70 | 0.00 | 0.00 | 0.62 | 0.34 | 12 | Macrophage |
| Gusb      | 0.58 | 0.00 | 0.00 | 0.27 | 0.08 | 12 | Macrophage |
| Atp6v0b   | 0.70 | 0.00 | 0.00 | 0.44 | 0.18 | 12 | Macrophage |
| Rpl1      | 0.44 | 0.00 | 0.00 | 0.96 | 0.90 | 12 | Macrophage |
| Capg      | 0.58 | 0.00 | 0.00 | 0.31 | 0.10 | 12 | Macrophage |
| Lamp1     | 0.67 | 0.00 | 0.00 | 0.69 | 0.42 | 12 | Macrophage |
| Cndp2     | 0.65 | 0.00 | 0.00 | 0.27 | 0.08 | 12 | Macrophage |
| Anp32b    | 0.77 | 0.00 | 0.00 | 0.74 | 0.49 | 12 | Macrophage |
| Lgmn      | 0.76 | 0.00 | 0.00 | 0.34 | 0.12 | 12 | Macrophage |
| Emb       | 0.64 | 0.00 | 0.00 | 0.32 | 0.11 | 12 | Macrophage |
| Rpl2      | 0.45 | 0.00 | 0.00 | 0.93 | 0.81 | 12 | Macrophage |
| Plgrkt    | 0.61 | 0.00 | 0.00 | 0.31 | 0.11 | 12 | Macrophage |
| Tkt       | 0.73 | 0.00 | 0.00 | 0.36 | 0.14 | 12 | Macrophage |
| Arpc1b    | 0.69 | 0.00 | 0.00 | 0.63 | 0.37 | 12 | Macrophage |
| Neat1     | 0.61 | 0.00 | 0.00 | 0.56 | 0.26 | 12 | Macrophage |
| Gm10073   | 0.44 | 0.00 | 0.00 | 0.95 | 0.85 | 12 | Macrophage |
| Gm22751   | 0.82 | 0.00 | 0.00 | 0.38 | 0.16 | 12 | Macrophage |
| Soat1     | 0.68 | 0.00 | 0.00 | 0.30 | 0.10 | 12 | Macrophage |
| Gm9843    | 0.40 | 0.00 | 0.00 | 0.97 | 0.92 | 12 | Macrophage |
| Sdcbp     | 0.76 | 0.00 | 0.00 | 0.52 | 0.27 | 12 | Macrophage |
| Rab8b     | 0.60 | 0.00 | 0.00 | 0.28 | 0.09 | 12 | Macrophage |
| Lipa      | 0.66 | 0.00 | 0.00 | 0.32 | 0.12 | 12 | Macrophage |
| Akap13    | 0.66 | 0.00 | 0.00 | 0.52 | 0.26 | 12 | Macrophage |
| Rpsa      | 0.53 | 0.00 | 0.00 | 0.81 | 0.61 | 12 | Macrophage |
| H2-D1     | 0.54 | 0.00 | 0.00 | 0.76 | 0.49 | 12 | Macrophage |
| Idh1      | 0.67 | 0.00 | 0.00 | 0.27 | 0.09 | 12 | Macrophage |
| mt-Rnr2   | 0.40 | 0.00 | 0.00 | 1.00 | 0.99 | 12 | Macrophage |

|               |      |      |      |      |      |    |            |
|---------------|------|------|------|------|------|----|------------|
| Dbi           | 0.69 | 0.00 | 0.00 | 0.61 | 0.36 | 12 | Macrophage |
| Rpl37a        | 0.44 | 0.00 | 0.00 | 0.93 | 0.83 | 12 | Macrophage |
| Gngt2         | 0.53 | 0.00 | 0.00 | 0.29 | 0.10 | 12 | Macrophage |
| Fau           | 0.43 | 0.00 | 0.00 | 0.93 | 0.87 | 12 | Macrophage |
| Gabarap       | 0.68 | 0.00 | 0.00 | 0.65 | 0.44 | 12 | Macrophage |
| Gm26924       | 1.51 | 0.00 | 0.00 | 0.76 | 0.56 | 12 | Macrophage |
| 9-Sep         | 0.58 | 0.00 | 0.00 | 0.26 | 0.09 | 12 | Macrophage |
| Mir682        | 0.43 | 0.00 | 0.00 | 0.94 | 0.85 | 12 | Macrophage |
| Sgk1          | 0.77 | 0.00 | 0.00 | 0.41 | 0.18 | 12 | Macrophage |
| Rpl35a        | 0.44 | 0.00 | 0.00 | 0.91 | 0.79 | 12 | Macrophage |
| Rpl38         | 0.49 | 0.00 | 0.00 | 0.86 | 0.73 | 12 | Macrophage |
| Clta          | 0.58 | 0.00 | 0.00 | 0.66 | 0.42 | 12 | Macrophage |
| Rpsa-ps10     | 0.46 | 0.00 | 0.00 | 0.84 | 0.67 | 12 | Macrophage |
| Actr3         | 0.60 | 0.00 | 0.00 | 0.57 | 0.32 | 12 | Macrophage |
| Gm22758       | 0.50 | 0.00 | 0.00 | 0.84 | 0.68 | 12 | Macrophage |
| Lmo4          | 0.75 | 0.00 | 0.00 | 0.48 | 0.25 | 12 | Macrophage |
| Arpc2         | 0.52 | 0.00 | 0.00 | 0.79 | 0.61 | 12 | Macrophage |
| Tmed5         | 0.56 | 0.00 | 0.00 | 0.38 | 0.17 | 12 | Macrophage |
| Rps9          | 0.34 | 0.00 | 0.00 | 0.96 | 0.91 | 12 | Macrophage |
| 1810037l17Rik | 0.71 | 0.00 | 0.00 | 0.55 | 0.31 | 12 | Macrophage |
| Smpdl3a       | 0.58 | 0.00 | 0.00 | 0.28 | 0.10 | 12 | Macrophage |
| Pitpna        | 0.54 | 0.00 | 0.00 | 0.30 | 0.12 | 12 | Macrophage |
| Ptbp3         | 0.60 | 0.00 | 0.00 | 0.59 | 0.36 | 12 | Macrophage |
| Zeb2          | 0.52 | 0.00 | 0.00 | 0.56 | 0.30 | 12 | Macrophage |
| Txn1          | 0.64 | 0.00 | 0.00 | 0.70 | 0.49 | 12 | Macrophage |
| Rnh1          | 0.64 | 0.00 | 0.00 | 0.34 | 0.15 | 12 | Macrophage |
| Fabp5         | 0.88 | 0.00 | 0.00 | 0.31 | 0.13 | 12 | Macrophage |
| Fam111a       | 0.50 | 0.00 | 0.00 | 0.35 | 0.15 | 12 | Macrophage |
| Nme1          | 0.64 | 0.00 | 0.00 | 0.39 | 0.18 | 12 | Macrophage |
| Asah1         | 0.54 | 0.00 | 0.00 | 0.30 | 0.12 | 12 | Macrophage |
| Cox5a         | 0.62 | 0.00 | 0.00 | 0.54 | 0.31 | 12 | Macrophage |
| Serp1         | 0.58 | 0.00 | 0.00 | 0.44 | 0.22 | 12 | Macrophage |
| Il6ra         | 0.46 | 0.00 | 0.00 | 0.27 | 0.10 | 12 | Macrophage |
| Gm10076       | 0.35 | 0.00 | 0.00 | 0.97 | 0.92 | 12 | Macrophage |
| Ccdc88a       | 0.65 | 0.00 | 0.00 | 0.46 | 0.24 | 12 | Macrophage |
| BC005537      | 0.58 | 0.00 | 0.00 | 0.55 | 0.33 | 12 | Macrophage |
| Sh3bgrl3      | 0.56 | 0.00 | 0.00 | 0.57 | 0.34 | 12 | Macrophage |
| Cap1          | 0.55 | 0.00 | 0.00 | 0.36 | 0.16 | 12 | Macrophage |
| Cox4i1        | 0.43 | 0.00 | 0.00 | 0.87 | 0.73 | 12 | Macrophage |
| Psme2b        | 0.63 | 0.00 | 0.00 | 0.50 | 0.29 | 12 | Macrophage |
| Coro1b        | 0.53 | 0.00 | 0.00 | 0.46 | 0.24 | 12 | Macrophage |
| Gm5506        | 0.55 | 0.00 | 0.00 | 0.32 | 0.14 | 12 | Macrophage |
| Myeov2        | 0.59 | 0.00 | 0.00 | 0.51 | 0.29 | 12 | Macrophage |

|               |      |      |      |      |      |    |            |
|---------------|------|------|------|------|------|----|------------|
| Stat1         | 0.58 | 0.00 | 0.00 | 0.26 | 0.10 | 12 | Macrophage |
| Gm17511       | 0.51 | 0.00 | 0.00 | 0.76 | 0.61 | 12 | Macrophage |
| Eno1          | 0.54 | 0.00 | 0.00 | 0.34 | 0.16 | 12 | Macrophage |
| Tpm3-rs7      | 0.42 | 0.00 | 0.00 | 0.86 | 0.69 | 12 | Macrophage |
| Colgalt1      | 0.57 | 0.00 | 0.00 | 0.27 | 0.11 | 12 | Macrophage |
| B2m           | 0.64 | 0.00 | 0.00 | 0.81 | 0.67 | 12 | Macrophage |
| Cd47          | 0.58 | 0.00 | 0.00 | 0.64 | 0.43 | 12 | Macrophage |
| Gm22759       | 0.49 | 0.00 | 0.00 | 0.79 | 0.64 | 12 | Macrophage |
| Rps29         | 0.39 | 0.00 | 0.00 | 0.94 | 0.91 | 12 | Macrophage |
| Bola2         | 0.59 | 0.00 | 0.00 | 0.34 | 0.16 | 12 | Macrophage |
| Psme2         | 0.60 | 0.00 | 0.00 | 0.43 | 0.23 | 12 | Macrophage |
| Junb          | 0.61 | 0.00 | 0.00 | 0.38 | 0.19 | 12 | Macrophage |
| Snx1          | 0.52 | 0.00 | 0.00 | 0.27 | 0.11 | 12 | Macrophage |
| Fyb           | 0.48 | 0.00 | 0.00 | 0.37 | 0.18 | 12 | Macrophage |
| Eif3a         | 0.55 | 0.00 | 0.00 | 0.77 | 0.60 | 12 | Macrophage |
| Rpl22         | 0.37 | 0.00 | 0.00 | 0.89 | 0.79 | 12 | Macrophage |
| Psmb8         | 0.49 | 0.00 | 0.00 | 0.38 | 0.18 | 12 | Macrophage |
| Mycbp2        | 0.55 | 0.00 | 0.00 | 0.43 | 0.23 | 12 | Macrophage |
| Atp6ap2       | 0.57 | 0.00 | 0.00 | 0.32 | 0.15 | 12 | Macrophage |
| Nmt1          | 0.53 | 0.00 | 0.00 | 0.42 | 0.22 | 12 | Macrophage |
| Ncl           | 0.45 | 0.00 | 0.00 | 0.88 | 0.78 | 12 | Macrophage |
| Rpl41         | 0.30 | 0.00 | 0.00 | 0.97 | 0.95 | 12 | Macrophage |
| Snx5          | 0.47 | 0.00 | 0.00 | 0.29 | 0.13 | 12 | Macrophage |
| Cox17         | 0.63 | 0.00 | 0.00 | 0.43 | 0.24 | 12 | Macrophage |
| Itgam         | 0.56 | 0.00 | 0.00 | 0.47 | 0.28 | 12 | Macrophage |
| Gm24865       | 0.44 | 0.00 | 0.00 | 0.77 | 0.62 | 12 | Macrophage |
| Lrrfip1       | 0.51 | 0.00 | 0.00 | 0.45 | 0.25 | 12 | Macrophage |
| Ucp2          | 0.42 | 0.00 | 0.00 | 0.28 | 0.12 | 12 | Macrophage |
| Abraci        | 0.57 | 0.00 | 0.00 | 0.42 | 0.23 | 12 | Macrophage |
| 2010107E04Rik | 0.48 | 0.00 | 0.00 | 0.60 | 0.40 | 12 | Macrophage |
| Tmem160       | 0.44 | 0.00 | 0.00 | 0.26 | 0.11 | 12 | Macrophage |
| Prdx1         | 0.62 | 0.00 | 0.00 | 0.67 | 0.50 | 12 | Macrophage |
| Lsp1          | 0.28 | 0.00 | 0.00 | 0.39 | 0.19 | 12 | Macrophage |
| Fn1           | 0.34 | 0.00 | 0.00 | 0.45 | 0.23 | 12 | Macrophage |
| Ptpn18        | 0.40 | 0.00 | 0.00 | 0.31 | 0.14 | 12 | Macrophage |
| Mndal         | 0.54 | 0.00 | 0.00 | 0.34 | 0.16 | 12 | Macrophage |
| Arpc4         | 0.45 | 0.00 | 0.00 | 0.35 | 0.17 | 12 | Macrophage |
| Lyn           | 0.41 | 0.00 | 0.00 | 0.29 | 0.13 | 12 | Macrophage |
| Etfb          | 0.55 | 0.00 | 0.00 | 0.47 | 0.28 | 12 | Macrophage |
| Pfn1          | 0.45 | 0.00 | 0.00 | 0.65 | 0.46 | 12 | Macrophage |
| S100a6        | 0.26 | 0.00 | 0.00 | 0.53 | 0.31 | 12 | Macrophage |
| Skap2         | 0.42 | 0.00 | 0.00 | 0.28 | 0.12 | 12 | Macrophage |
| Gm22426       | 0.46 | 0.00 | 0.00 | 0.65 | 0.48 | 12 | Macrophage |

|                |      |      |      |      |      |    |            |
|----------------|------|------|------|------|------|----|------------|
| Gm10221        | 0.47 | 0.00 | 0.00 | 0.63 | 0.46 | 12 | Macrophage |
| Tmem14c        | 0.52 | 0.00 | 0.00 | 0.38 | 0.21 | 12 | Macrophage |
| Hspa8          | 0.41 | 0.00 | 0.00 | 0.81 | 0.67 | 12 | Macrophage |
| Eif2s2         | 0.51 | 0.00 | 0.00 | 0.64 | 0.47 | 12 | Macrophage |
| Ptpn12         | 0.55 | 0.00 | 0.00 | 0.28 | 0.13 | 12 | Macrophage |
| Lamtor2        | 0.51 | 0.00 | 0.00 | 0.31 | 0.15 | 12 | Macrophage |
| Eif5b          | 0.45 | 0.00 | 0.00 | 0.69 | 0.51 | 12 | Macrophage |
| Atp6ap1        | 0.52 | 0.00 | 0.00 | 0.27 | 0.12 | 12 | Macrophage |
| Gm5244         | 0.44 | 0.00 | 0.00 | 0.47 | 0.28 | 12 | Macrophage |
| Chmp4b         | 0.52 | 0.00 | 0.00 | 0.37 | 0.20 | 12 | Macrophage |
| Atp5l          | 0.46 | 0.00 | 0.00 | 0.61 | 0.43 | 12 | Macrophage |
| Tpm3           | 0.34 | 0.00 | 0.00 | 0.84 | 0.70 | 12 | Macrophage |
| Tapbp          | 0.50 | 0.00 | 0.00 | 0.30 | 0.14 | 12 | Macrophage |
| S100a10        | 0.39 | 0.00 | 0.00 | 0.58 | 0.38 | 12 | Macrophage |
| Gm26300        | 0.49 | 0.00 | 0.00 | 0.55 | 0.37 | 12 | Macrophage |
| H2-K1          | 0.38 | 0.00 | 0.00 | 0.52 | 0.32 | 12 | Macrophage |
| Sod2           | 0.57 | 0.00 | 0.00 | 0.27 | 0.13 | 12 | Macrophage |
| Rgs2           | 0.32 | 0.00 | 0.00 | 0.47 | 0.28 | 12 | Macrophage |
| 9930111J21Rik2 | 0.32 | 0.00 | 0.00 | 0.26 | 0.12 | 12 | Macrophage |
| Cd164          | 0.59 | 0.00 | 0.00 | 0.27 | 0.14 | 12 | Macrophage |
| Ctage5         | 0.49 | 0.00 | 0.00 | 0.46 | 0.28 | 12 | Macrophage |
| Gmfg           | 0.33 | 0.00 | 0.00 | 0.29 | 0.14 | 12 | Macrophage |
| Cmpk1          | 0.48 | 0.00 | 0.00 | 0.37 | 0.21 | 12 | Macrophage |
| Anxa1          | 0.28 | 0.00 | 0.00 | 0.35 | 0.18 | 12 | Macrophage |
| Erp29          | 0.45 | 0.00 | 0.00 | 0.43 | 0.26 | 12 | Macrophage |
| Gbp7           | 0.46 | 0.00 | 0.00 | 0.28 | 0.14 | 12 | Macrophage |
| Ap1s2          | 0.54 | 0.00 | 0.00 | 0.25 | 0.12 | 12 | Macrophage |
| Diap1          | 0.44 | 0.00 | 0.00 | 0.28 | 0.14 | 12 | Macrophage |
| Rps10-ps1      | 0.28 | 0.00 | 0.00 | 0.87 | 0.77 | 12 | Macrophage |
| Zfp36          | 0.48 | 0.00 | 0.00 | 0.31 | 0.16 | 12 | Macrophage |
| Pkm            | 0.48 | 0.00 | 0.00 | 0.38 | 0.22 | 12 | Macrophage |
| Ddx21          | 0.47 | 0.00 | 0.00 | 0.42 | 0.26 | 12 | Macrophage |
| Akr1a1         | 0.41 | 0.00 | 0.00 | 0.65 | 0.49 | 12 | Macrophage |
| Rps10          | 0.29 | 0.00 | 0.00 | 0.81 | 0.70 | 12 | Macrophage |
| Psm13          | 0.47 | 0.00 | 0.00 | 0.31 | 0.17 | 12 | Macrophage |
| Rpl23          | 0.27 | 0.00 | 0.00 | 0.91 | 0.87 | 12 | Macrophage |
| Znhit1         | 0.41 | 0.00 | 0.00 | 0.27 | 0.14 | 12 | Macrophage |
| Atp6v1g1       | 0.48 | 0.00 | 0.00 | 0.48 | 0.32 | 12 | Macrophage |
| Atp6v0e        | 0.38 | 0.00 | 0.00 | 0.35 | 0.20 | 12 | Macrophage |
| Utp14a         | 0.42 | 0.00 | 0.00 | 0.30 | 0.15 | 12 | Macrophage |
| Rrbp1          | 0.36 | 0.00 | 0.00 | 0.70 | 0.55 | 12 | Macrophage |
| Prr13          | 0.37 | 0.00 | 0.00 | 0.26 | 0.13 | 12 | Macrophage |
| Atp1b3         | 0.43 | 0.00 | 0.00 | 0.41 | 0.25 | 12 | Macrophage |

|               |      |      |      |      |      |    |            |
|---------------|------|------|------|------|------|----|------------|
| Gnai2         | 0.34 | 0.00 | 0.00 | 0.56 | 0.38 | 12 | Macrophage |
| Pomp          | 0.40 | 0.00 | 0.00 | 0.47 | 0.31 | 12 | Macrophage |
| Ptpn1         | 0.40 | 0.00 | 0.00 | 0.35 | 0.20 | 12 | Macrophage |
| Tmbim6        | 0.42 | 0.00 | 0.00 | 0.53 | 0.37 | 12 | Macrophage |
| Aldoa         | 0.41 | 0.00 | 0.00 | 0.33 | 0.19 | 12 | Macrophage |
| Ahnak         | 0.34 | 0.00 | 0.00 | 0.61 | 0.43 | 12 | Macrophage |
| Atp5l-ps1     | 0.42 | 0.00 | 0.00 | 0.42 | 0.27 | 12 | Macrophage |
| Gm25593       | 0.41 | 0.00 | 0.00 | 0.35 | 0.21 | 12 | Macrophage |
| Eif5a         | 0.42 | 0.00 | 0.00 | 0.49 | 0.34 | 12 | Macrophage |
| Rexo2         | 0.44 | 0.00 | 0.00 | 0.27 | 0.14 | 12 | Macrophage |
| Rbm25         | 0.36 | 0.00 | 0.00 | 0.80 | 0.68 | 12 | Macrophage |
| Hsp90b1       | 0.40 | 0.00 | 0.00 | 0.84 | 0.76 | 12 | Macrophage |
| Anxa2         | 0.44 | 0.00 | 0.00 | 0.62 | 0.47 | 12 | Macrophage |
| Rpl36a1       | 0.34 | 0.00 | 0.00 | 0.67 | 0.52 | 12 | Macrophage |
| Ubl3          | 0.38 | 0.00 | 0.00 | 0.33 | 0.19 | 12 | Macrophage |
| Ivns1abp      | 0.34 | 0.00 | 0.00 | 0.37 | 0.22 | 12 | Macrophage |
| Emp3          | 0.34 | 0.00 | 0.00 | 0.36 | 0.21 | 12 | Macrophage |
| Arpc3         | 0.35 | 0.00 | 0.00 | 0.41 | 0.26 | 12 | Macrophage |
| Glud1         | 0.35 | 0.00 | 0.00 | 0.31 | 0.17 | 12 | Macrophage |
| Acaa1a        | 0.42 | 0.00 | 0.00 | 0.29 | 0.16 | 12 | Macrophage |
| Ifngr1        | 0.43 | 0.00 | 0.00 | 0.38 | 0.24 | 12 | Macrophage |
| Tmem256       | 0.38 | 0.00 | 0.00 | 0.48 | 0.33 | 12 | Macrophage |
| Slc6a6        | 0.29 | 0.00 | 0.00 | 0.41 | 0.25 | 12 | Macrophage |
| Cdk2ap2       | 0.40 | 0.00 | 0.00 | 0.28 | 0.15 | 12 | Macrophage |
| Cst3          | 0.45 | 0.00 | 0.00 | 0.68 | 0.59 | 12 | Macrophage |
| Vamp8         | 0.32 | 0.00 | 0.00 | 0.51 | 0.34 | 12 | Macrophage |
| 2810474O19Rik | 0.38 | 0.00 | 0.00 | 0.41 | 0.26 | 12 | Macrophage |
| Sh3bgrl       | 0.28 | 0.00 | 0.00 | 0.62 | 0.44 | 12 | Macrophage |
| Gapdh         | 0.41 | 0.00 | 0.00 | 0.26 | 0.14 | 12 | Macrophage |
| Nsa2          | 0.36 | 0.00 | 0.00 | 0.45 | 0.30 | 12 | Macrophage |
| Ran           | 0.39 | 0.00 | 0.00 | 0.54 | 0.38 | 12 | Macrophage |
| Tbca          | 0.44 | 0.00 | 0.00 | 0.47 | 0.34 | 12 | Macrophage |
| Arpp19        | 0.41 | 0.00 | 0.00 | 0.45 | 0.31 | 12 | Macrophage |
| Actg1         | 0.26 | 0.00 | 0.00 | 0.85 | 0.76 | 12 | Macrophage |
| Esd           | 0.46 | 0.00 | 0.00 | 0.33 | 0.20 | 12 | Macrophage |
| Gm10126       | 0.39 | 0.00 | 0.00 | 0.53 | 0.40 | 12 | Macrophage |
| Chmp3         | 0.37 | 0.00 | 0.00 | 0.34 | 0.21 | 12 | Macrophage |
| Ostf1         | 0.33 | 0.00 | 0.00 | 0.40 | 0.25 | 12 | Macrophage |
| Gm20091       | 0.36 | 0.00 | 0.00 | 0.35 | 0.22 | 12 | Macrophage |
| Tspo          | 0.42 | 0.00 | 0.00 | 0.38 | 0.25 | 12 | Macrophage |
| Hmgn2         | 0.33 | 0.00 | 0.00 | 0.58 | 0.43 | 12 | Macrophage |
| Rbm3          | 0.37 | 0.00 | 0.00 | 0.54 | 0.41 | 12 | Macrophage |
| Dnajc2        | 0.39 | 0.00 | 0.00 | 0.33 | 0.20 | 12 | Macrophage |

|               |      |      |      |      |      |    |            |
|---------------|------|------|------|------|------|----|------------|
| Irf2bp2       | 0.41 | 0.00 | 0.00 | 0.27 | 0.16 | 12 | Macrophage |
| Cox7b         | 0.38 | 0.00 | 0.00 | 0.59 | 0.46 | 12 | Macrophage |
| Sec11c        | 0.30 | 0.00 | 0.00 | 0.30 | 0.18 | 12 | Macrophage |
| Hspe1         | 0.39 | 0.00 | 0.00 | 0.42 | 0.28 | 12 | Macrophage |
| Dazap2        | 0.36 | 0.00 | 0.00 | 0.33 | 0.21 | 12 | Macrophage |
| Ifi203        | 0.28 | 0.00 | 0.00 | 0.26 | 0.14 | 12 | Macrophage |
| Timm10b       | 0.35 | 0.00 | 0.00 | 0.29 | 0.17 | 12 | Macrophage |
| Gm22761       | 0.37 | 0.00 | 0.00 | 0.29 | 0.17 | 12 | Macrophage |
| Srp9          | 0.38 | 0.00 | 0.00 | 0.42 | 0.28 | 12 | Macrophage |
| Uqcrcq        | 0.36 | 0.00 | 0.00 | 0.47 | 0.33 | 12 | Macrophage |
| Stx7          | 0.34 | 0.00 | 0.00 | 0.26 | 0.15 | 12 | Macrophage |
| Jhdm1d        | 0.35 | 0.00 | 0.00 | 0.27 | 0.16 | 12 | Macrophage |
| Ldha          | 0.36 | 0.00 | 0.00 | 0.42 | 0.29 | 12 | Macrophage |
| Flna          | 0.34 | 0.00 | 0.00 | 0.36 | 0.23 | 12 | Macrophage |
| Klf6          | 0.30 | 0.00 | 0.00 | 0.51 | 0.36 | 12 | Macrophage |
| Tor1aip1      | 0.29 | 0.00 | 0.00 | 0.31 | 0.19 | 12 | Macrophage |
| Gm10282       | 0.34 | 0.00 | 0.00 | 0.54 | 0.40 | 12 | Macrophage |
| Scand1        | 0.30 | 0.00 | 0.00 | 0.27 | 0.16 | 12 | Macrophage |
| Polr2l        | 0.38 | 0.00 | 0.00 | 0.27 | 0.16 | 12 | Macrophage |
| Eif3j1        | 0.40 | 0.00 | 0.00 | 0.42 | 0.29 | 12 | Macrophage |
| Cox6b1        | 0.27 | 0.00 | 0.00 | 0.68 | 0.57 | 12 | Macrophage |
| Gdi2          | 0.36 | 0.00 | 0.00 | 0.46 | 0.33 | 12 | Macrophage |
| Atp6v1d       | 0.35 | 0.00 | 0.00 | 0.28 | 0.17 | 12 | Macrophage |
| Snrpe         | 0.32 | 0.00 | 0.00 | 0.49 | 0.36 | 12 | Macrophage |
| Vasp          | 0.33 | 0.00 | 0.00 | 0.31 | 0.19 | 12 | Macrophage |
| Cltc          | 0.37 | 0.00 | 0.00 | 0.30 | 0.18 | 12 | Macrophage |
| Eif3j2        | 0.40 | 0.00 | 0.00 | 0.44 | 0.32 | 12 | Macrophage |
| Tpr           | 0.29 | 0.00 | 0.00 | 0.63 | 0.49 | 12 | Macrophage |
| Atg3          | 0.30 | 0.00 | 0.00 | 0.30 | 0.18 | 12 | Macrophage |
| Ddx46         | 0.33 | 0.00 | 0.00 | 0.42 | 0.29 | 12 | Macrophage |
| Cdc5l         | 0.38 | 0.00 | 0.00 | 0.34 | 0.22 | 12 | Macrophage |
| 0610009D07Rik | 0.30 | 0.00 | 0.00 | 0.34 | 0.22 | 12 | Macrophage |
| Celf2         | 0.26 | 0.00 | 0.00 | 0.41 | 0.28 | 12 | Macrophage |
| Prpf40a       | 0.32 | 0.00 | 0.00 | 0.45 | 0.32 | 12 | Macrophage |
| Psme1         | 0.35 | 0.00 | 0.00 | 0.43 | 0.31 | 12 | Macrophage |
| Sh3glb1       | 0.30 | 0.00 | 0.00 | 0.53 | 0.40 | 12 | Macrophage |
| Calm3         | 0.33 | 0.00 | 0.00 | 0.30 | 0.19 | 12 | Macrophage |
| Anxa5         | 0.37 | 0.00 | 0.00 | 0.52 | 0.40 | 12 | Macrophage |
| Hspa9         | 0.41 | 0.00 | 0.00 | 0.26 | 0.16 | 12 | Macrophage |
| Hnrnpm        | 0.30 | 0.00 | 0.00 | 0.62 | 0.49 | 12 | Macrophage |
| Stk38         | 0.28 | 0.00 | 0.00 | 0.31 | 0.20 | 12 | Macrophage |
| Romo1         | 0.33 | 0.00 | 0.00 | 0.42 | 0.30 | 12 | Macrophage |
| Ywhah         | 0.32 | 0.00 | 0.00 | 0.38 | 0.26 | 12 | Macrophage |

|               |      |      |      |      |      |    |            |
|---------------|------|------|------|------|------|----|------------|
| Grb2          | 0.26 | 0.00 | 0.00 | 0.29 | 0.18 | 12 | Macrophage |
| Ndufa2        | 0.30 | 0.00 | 0.00 | 0.55 | 0.43 | 12 | Macrophage |
| Hspd1         | 0.38 | 0.00 | 0.00 | 0.37 | 0.25 | 12 | Macrophage |
| Atox1         | 0.30 | 0.00 | 0.00 | 0.48 | 0.36 | 12 | Macrophage |
| Canx          | 0.32 | 0.00 | 0.00 | 0.60 | 0.49 | 12 | Macrophage |
| Cox7c         | 0.25 | 0.00 | 0.00 | 0.73 | 0.63 | 12 | Macrophage |
| Snrpb2        | 0.29 | 0.00 | 0.00 | 0.36 | 0.24 | 12 | Macrophage |
| Cast          | 0.31 | 0.00 | 0.00 | 0.30 | 0.19 | 12 | Macrophage |
| Atp5g3        | 0.33 | 0.00 | 0.00 | 0.48 | 0.36 | 12 | Macrophage |
| Tbcb          | 0.28 | 0.00 | 0.00 | 0.35 | 0.23 | 12 | Macrophage |
| Gm20594       | 0.30 | 0.00 | 0.00 | 0.27 | 0.17 | 12 | Macrophage |
| Atp6v1f       | 0.30 | 0.00 | 0.00 | 0.35 | 0.24 | 12 | Macrophage |
| F11r          | 0.29 | 0.00 | 0.00 | 0.26 | 0.16 | 12 | Macrophage |
| Hspa4         | 0.34 | 0.00 | 0.00 | 0.34 | 0.23 | 12 | Macrophage |
| Atp6v0d1      | 0.31 | 0.00 | 0.00 | 0.27 | 0.18 | 12 | Macrophage |
| Nars          | 0.29 | 0.00 | 0.00 | 0.44 | 0.32 | 12 | Macrophage |
| Arf5          | 0.29 | 0.00 | 0.00 | 0.38 | 0.28 | 12 | Macrophage |
| Rtn3          | 0.26 | 0.00 | 0.00 | 0.36 | 0.25 | 12 | Macrophage |
| Ndufa1        | 0.28 | 0.00 | 0.00 | 0.42 | 0.31 | 12 | Macrophage |
| Wdr1          | 0.27 | 0.00 | 0.00 | 0.26 | 0.17 | 12 | Macrophage |
| Utp3          | 0.28 | 0.00 | 0.00 | 0.32 | 0.22 | 12 | Macrophage |
| H2afy         | 0.27 | 0.00 | 0.00 | 0.29 | 0.20 | 12 | Macrophage |
| Adipor1       | 0.28 | 0.00 | 0.00 | 0.34 | 0.23 | 12 | Macrophage |
| Jtb           | 0.29 | 0.00 | 0.00 | 0.28 | 0.18 | 12 | Macrophage |
| Nol7          | 0.25 | 0.00 | 0.00 | 0.47 | 0.35 | 12 | Macrophage |
| Mtdh          | 0.30 | 0.00 | 0.00 | 0.59 | 0.48 | 12 | Macrophage |
| Chmp2a        | 0.27 | 0.00 | 0.00 | 0.42 | 0.31 | 12 | Macrophage |
| Psmb5         | 0.25 | 0.00 | 0.00 | 0.33 | 0.22 | 12 | Macrophage |
| Atp6v1a       | 0.29 | 0.00 | 0.00 | 0.38 | 0.28 | 12 | Macrophage |
| Mtpn          | 0.29 | 0.00 | 0.00 | 0.37 | 0.27 | 12 | Macrophage |
| Rap1b         | 0.27 | 0.00 | 0.00 | 0.33 | 0.23 | 12 | Macrophage |
| S100a11       | 0.30 | 0.00 | 0.00 | 0.58 | 0.49 | 12 | Macrophage |
| Snrpd1        | 0.27 | 0.00 | 0.00 | 0.29 | 0.20 | 12 | Macrophage |
| Timm13        | 0.27 | 0.00 | 0.00 | 0.32 | 0.23 | 12 | Macrophage |
| Eea1          | 0.29 | 0.00 | 0.00 | 0.30 | 0.21 | 12 | Macrophage |
| Sdhb          | 0.26 | 0.00 | 0.00 | 0.26 | 0.17 | 12 | Macrophage |
| Jund          | 0.31 | 0.00 | 0.00 | 0.36 | 0.28 | 12 | Macrophage |
| Smarca5       | 0.27 | 0.00 | 0.00 | 0.40 | 0.30 | 12 | Macrophage |
| Zc3h13        | 0.27 | 0.00 | 0.00 | 0.42 | 0.33 | 12 | Macrophage |
| Btg2          | 0.30 | 0.00 | 0.00 | 0.31 | 0.23 | 12 | Macrophage |
| B020018G12Rik | 0.25 | 0.00 | 0.00 | 0.34 | 0.26 | 12 | Macrophage |
| Mif           | 0.25 | 0.00 | 0.00 | 0.27 | 0.19 | 12 | Macrophage |
| Pcna-ps2      | 0.29 | 0.00 | 0.00 | 0.25 | 0.18 | 12 | Macrophage |

|               |      |      |      |      |      |    |                   |
|---------------|------|------|------|------|------|----|-------------------|
| Ghitm         | 0.29 | 0.00 | 0.00 | 0.29 | 0.22 | 12 | Macrophage        |
| Acta2         | 2.39 | 0.00 | 0.00 | 0.66 | 0.18 | 13 | Matrix Fibroblast |
| Dcn           | 2.38 | 0.00 | 0.00 | 0.36 | 0.01 | 13 | Matrix Fibroblast |
| Col1a1        | 2.30 | 0.00 | 0.00 | 0.79 | 0.24 | 13 | Matrix Fibroblast |
| Col3a1        | 2.25 | 0.00 | 0.00 | 0.81 | 0.31 | 13 | Matrix Fibroblast |
| Igfbp5        | 2.25 | 0.00 | 0.00 | 0.56 | 0.09 | 13 | Matrix Fibroblast |
| Col1a2        | 2.17 | 0.00 | 0.00 | 0.98 | 0.38 | 13 | Matrix Fibroblast |
| MyI9          | 1.83 | 0.00 | 0.00 | 0.55 | 0.11 | 13 | Matrix Fibroblast |
| Tpm2          | 1.82 | 0.00 | 0.00 | 0.58 | 0.12 | 13 | Matrix Fibroblast |
| Col14a1       | 1.81 | 0.00 | 0.00 | 0.50 | 0.04 | 13 | Matrix Fibroblast |
| Actc1         | 1.80 | 0.00 | 0.00 | 0.26 | 0.02 | 13 | Matrix Fibroblast |
| Tagln         | 1.75 | 0.00 | 0.00 | 0.55 | 0.14 | 13 | Matrix Fibroblast |
| Lmod1         | 1.72 | 0.00 | 0.00 | 0.38 | 0.03 | 13 | Matrix Fibroblast |
| Mfap5         | 1.71 | 0.00 | 0.00 | 0.41 | 0.05 | 13 | Matrix Fibroblast |
| Mgp           | 1.67 | 0.00 | 0.00 | 0.88 | 0.30 | 13 | Matrix Fibroblast |
| Postn         | 1.67 | 0.00 | 0.00 | 0.51 | 0.07 | 13 | Matrix Fibroblast |
| Pi15          | 1.60 | 0.00 | 0.00 | 0.34 | 0.02 | 13 | Matrix Fibroblast |
| Gpc6          | 1.47 | 0.00 | 0.00 | 0.35 | 0.01 | 13 | Matrix Fibroblast |
| Fstl1         | 1.39 | 0.00 | 0.00 | 0.94 | 0.43 | 13 | Matrix Fibroblast |
| Eln           | 1.38 | 0.00 | 0.00 | 0.62 | 0.14 | 13 | Matrix Fibroblast |
| Ccdc80        | 1.36 | 0.00 | 0.00 | 0.51 | 0.10 | 13 | Matrix Fibroblast |
| Ogn           | 1.29 | 0.00 | 0.00 | 0.54 | 0.12 | 13 | Matrix Fibroblast |
| Sparc         | 1.28 | 0.00 | 0.00 | 0.99 | 0.73 | 13 | Matrix Fibroblast |
| Igfbp7        | 1.26 | 0.00 | 0.00 | 0.90 | 0.38 | 13 | Matrix Fibroblast |
| Lgals1        | 1.24 | 0.00 | 0.00 | 0.93 | 0.40 | 13 | Matrix Fibroblast |
| Lox           | 1.21 | 0.00 | 0.00 | 0.54 | 0.12 | 13 | Matrix Fibroblast |
| Adamts2       | 1.18 | 0.00 | 0.00 | 0.50 | 0.09 | 13 | Matrix Fibroblast |
| Rcn3          | 1.17 | 0.00 | 0.00 | 0.54 | 0.12 | 13 | Matrix Fibroblast |
| Osr1          | 1.14 | 0.00 | 0.00 | 0.31 | 0.02 | 13 | Matrix Fibroblast |
| Loxl1         | 1.06 | 0.00 | 0.00 | 0.48 | 0.10 | 13 | Matrix Fibroblast |
| Prrx1         | 0.94 | 0.00 | 0.00 | 0.27 | 0.02 | 13 | Matrix Fibroblast |
| Gpc3          | 1.66 | 0.00 | 0.00 | 0.55 | 0.15 | 13 | Matrix Fibroblast |
| Myh11         | 1.94 | 0.00 | 0.00 | 0.43 | 0.10 | 13 | Matrix Fibroblast |
| Aspn          | 0.63 | 0.00 | 0.00 | 0.43 | 0.09 | 13 | Matrix Fibroblast |
| 0610007N19Rik | 1.01 | 0.00 | 0.00 | 0.52 | 0.13 | 13 | Matrix Fibroblast |
| Plac9b        | 0.99 | 0.00 | 0.00 | 0.78 | 0.29 | 13 | Matrix Fibroblast |
| Aebp1         | 1.19 | 0.00 | 0.00 | 0.36 | 0.07 | 13 | Matrix Fibroblast |
| Rarres2       | 1.26 | 0.00 | 0.00 | 0.48 | 0.12 | 13 | Matrix Fibroblast |
| Plac9a        | 0.98 | 0.00 | 0.00 | 0.77 | 0.29 | 13 | Matrix Fibroblast |
| Col5a1        | 0.98 | 0.00 | 0.00 | 0.39 | 0.08 | 13 | Matrix Fibroblast |
| Cygb          | 1.02 | 0.00 | 0.00 | 0.30 | 0.05 | 13 | Matrix Fibroblast |
| Fbn1          | 1.01 | 0.00 | 0.00 | 0.55 | 0.16 | 13 | Matrix Fibroblast |
| Ndrg2         | 0.91 | 0.00 | 0.00 | 0.35 | 0.07 | 13 | Matrix Fibroblast |

|          |      |      |      |      |      |    |                   |
|----------|------|------|------|------|------|----|-------------------|
| Bgn      | 1.04 | 0.00 | 0.00 | 0.65 | 0.23 | 13 | Matrix Fibroblast |
| Actg2    | 1.38 | 0.00 | 0.00 | 0.33 | 0.07 | 13 | Matrix Fibroblast |
| Cald1    | 1.26 | 0.00 | 0.00 | 0.81 | 0.40 | 13 | Matrix Fibroblast |
| Selm     | 0.86 | 0.00 | 0.00 | 0.36 | 0.08 | 13 | Matrix Fibroblast |
| Pcolce   | 0.98 | 0.00 | 0.00 | 0.36 | 0.08 | 13 | Matrix Fibroblast |
| Itga8    | 1.22 | 0.00 | 0.00 | 0.37 | 0.08 | 13 | Matrix Fibroblast |
| Fam129a  | 0.97 | 0.00 | 0.00 | 0.35 | 0.08 | 13 | Matrix Fibroblast |
| Ptgis    | 0.86 | 0.00 | 0.00 | 0.27 | 0.05 | 13 | Matrix Fibroblast |
| Igf2     | 1.26 | 0.00 | 0.00 | 0.31 | 0.07 | 13 | Matrix Fibroblast |
| Serping1 | 0.91 | 0.00 | 0.00 | 0.43 | 0.11 | 13 | Matrix Fibroblast |
| Gucy1a3  | 0.70 | 0.00 | 0.00 | 0.38 | 0.09 | 13 | Matrix Fibroblast |
| Fxyd1    | 0.82 | 0.00 | 0.00 | 0.36 | 0.08 | 13 | Matrix Fibroblast |
| Tpm1     | 1.29 | 0.00 | 0.00 | 0.84 | 0.51 | 13 | Matrix Fibroblast |
| Gsn      | 1.03 | 0.00 | 0.00 | 0.61 | 0.24 | 13 | Matrix Fibroblast |
| Prkcdbp  | 0.89 | 0.00 | 0.00 | 0.39 | 0.11 | 13 | Matrix Fibroblast |
| Ltbp4    | 0.80 | 0.00 | 0.00 | 0.38 | 0.10 | 13 | Matrix Fibroblast |
| Cxcl12   | 0.47 | 0.00 | 0.00 | 0.41 | 0.11 | 13 | Matrix Fibroblast |
| Serpinh1 | 0.82 | 0.00 | 0.00 | 0.75 | 0.38 | 13 | Matrix Fibroblast |
| Map1b    | 0.97 | 0.00 | 0.00 | 0.35 | 0.10 | 13 | Matrix Fibroblast |
| Meg3     | 0.85 | 0.00 | 0.00 | 0.56 | 0.21 | 13 | Matrix Fibroblast |
| Fblim1   | 1.02 | 0.00 | 0.00 | 0.44 | 0.16 | 13 | Matrix Fibroblast |
| Col6a2   | 0.83 | 0.00 | 0.00 | 0.42 | 0.14 | 13 | Matrix Fibroblast |
| Col6a1   | 0.86 | 0.00 | 0.00 | 0.49 | 0.18 | 13 | Matrix Fibroblast |
| Col5a2   | 0.87 | 0.00 | 0.00 | 0.47 | 0.17 | 13 | Matrix Fibroblast |
| Cst3     | 0.64 | 0.00 | 0.00 | 0.85 | 0.58 | 13 | Matrix Fibroblast |
| Gata6    | 0.73 | 0.00 | 0.00 | 0.30 | 0.08 | 13 | Matrix Fibroblast |
| Timp2    | 0.79 | 0.00 | 0.00 | 0.50 | 0.20 | 13 | Matrix Fibroblast |
| Il11ra1  | 0.71 | 0.00 | 0.00 | 0.27 | 0.07 | 13 | Matrix Fibroblast |
| Csrp2    | 0.99 | 0.00 | 0.00 | 0.42 | 0.16 | 13 | Matrix Fibroblast |
| Maged2   | 0.69 | 0.00 | 0.00 | 0.44 | 0.17 | 13 | Matrix Fibroblast |
| Cd63     | 0.72 | 0.00 | 0.00 | 0.59 | 0.29 | 13 | Matrix Fibroblast |
| Vkorc1   | 0.62 | 0.00 | 0.00 | 0.31 | 0.10 | 13 | Matrix Fibroblast |
| Prss35   | 0.56 | 0.00 | 0.00 | 0.26 | 0.07 | 13 | Matrix Fibroblast |
| Cd81     | 0.63 | 0.00 | 0.00 | 0.72 | 0.40 | 13 | Matrix Fibroblast |
| Myh10    | 0.66 | 0.00 | 0.00 | 0.52 | 0.22 | 13 | Matrix Fibroblast |
| Mustn1   | 0.94 | 0.00 | 0.00 | 0.26 | 0.07 | 13 | Matrix Fibroblast |
| Akap12   | 1.13 | 0.00 | 0.00 | 0.50 | 0.23 | 13 | Matrix Fibroblast |
| Leprel2  | 0.59 | 0.00 | 0.00 | 0.25 | 0.07 | 13 | Matrix Fibroblast |
| Pls3     | 0.78 | 0.00 | 0.00 | 0.45 | 0.20 | 13 | Matrix Fibroblast |
| Crip1    | 1.04 | 0.00 | 0.00 | 0.72 | 0.47 | 13 | Matrix Fibroblast |
| Lhfp     | 0.71 | 0.00 | 0.00 | 0.39 | 0.15 | 13 | Matrix Fibroblast |
| Fn1      | 0.52 | 0.00 | 0.00 | 0.53 | 0.23 | 13 | Matrix Fibroblast |
| Nexn     | 0.58 | 0.00 | 0.00 | 0.50 | 0.21 | 13 | Matrix Fibroblast |

|          |      |      |      |      |      |    |                   |
|----------|------|------|------|------|------|----|-------------------|
| Slc25a4  | 0.70 | 0.00 | 0.00 | 0.74 | 0.50 | 13 | Matrix Fibroblast |
| Fam114a1 | 0.60 | 0.00 | 0.00 | 0.25 | 0.08 | 13 | Matrix Fibroblast |
| Col6a3   | 0.62 | 0.00 | 0.00 | 0.29 | 0.09 | 13 | Matrix Fibroblast |
| Flna     | 0.81 | 0.00 | 0.00 | 0.48 | 0.23 | 13 | Matrix Fibroblast |
| Myl6     | 0.74 | 0.00 | 0.00 | 0.86 | 0.69 | 13 | Matrix Fibroblast |
| Dnajb4   | 0.75 | 0.00 | 0.00 | 0.29 | 0.10 | 13 | Matrix Fibroblast |
| Antxr1   | 0.64 | 0.00 | 0.00 | 0.32 | 0.11 | 13 | Matrix Fibroblast |
| Fbln5    | 0.60 | 0.00 | 0.00 | 0.41 | 0.17 | 13 | Matrix Fibroblast |
| Gpx8     | 0.64 | 0.00 | 0.00 | 0.36 | 0.14 | 13 | Matrix Fibroblast |
| Nfia     | 0.70 | 0.00 | 0.00 | 0.48 | 0.23 | 13 | Matrix Fibroblast |
| Mmp14    | 0.68 | 0.00 | 0.00 | 0.50 | 0.25 | 13 | Matrix Fibroblast |
| S100a11  | 0.58 | 0.00 | 0.00 | 0.73 | 0.48 | 13 | Matrix Fibroblast |
| Loxl2    | 0.41 | 0.00 | 0.00 | 0.36 | 0.13 | 13 | Matrix Fibroblast |
| Plxdc2   | 0.52 | 0.00 | 0.00 | 0.33 | 0.12 | 13 | Matrix Fibroblast |
| Atp1a2   | 0.54 | 0.00 | 0.00 | 0.29 | 0.10 | 13 | Matrix Fibroblast |
| S100a6   | 0.37 | 0.00 | 0.00 | 0.61 | 0.31 | 13 | Matrix Fibroblast |
| Ilk      | 0.62 | 0.00 | 0.00 | 0.47 | 0.22 | 13 | Matrix Fibroblast |
| Rbp1     | 0.47 | 0.00 | 0.00 | 0.44 | 0.19 | 13 | Matrix Fibroblast |
| Cryab    | 0.59 | 0.00 | 0.00 | 0.35 | 0.14 | 13 | Matrix Fibroblast |
| Fhl1     | 0.30 | 0.00 | 0.00 | 0.59 | 0.29 | 13 | Matrix Fibroblast |
| Rrbp1    | 0.59 | 0.00 | 0.00 | 0.75 | 0.54 | 13 | Matrix Fibroblast |
| Pam      | 0.60 | 0.00 | 0.00 | 0.39 | 0.17 | 13 | Matrix Fibroblast |
| Dstn     | 0.81 | 0.00 | 0.00 | 0.71 | 0.50 | 13 | Matrix Fibroblast |
| Vim      | 0.49 | 0.00 | 0.00 | 0.87 | 0.66 | 13 | Matrix Fibroblast |
| Mylk     | 0.81 | 0.00 | 0.00 | 0.51 | 0.27 | 13 | Matrix Fibroblast |
| Cdh11    | 0.46 | 0.00 | 0.00 | 0.42 | 0.18 | 13 | Matrix Fibroblast |
| Nfib     | 0.55 | 0.00 | 0.00 | 0.71 | 0.46 | 13 | Matrix Fibroblast |
| Igfbp4   | 0.71 | 0.00 | 0.00 | 0.47 | 0.25 | 13 | Matrix Fibroblast |
| Ckap4    | 0.57 | 0.00 | 0.00 | 0.38 | 0.17 | 13 | Matrix Fibroblast |
| Fkbp9    | 0.50 | 0.00 | 0.00 | 0.32 | 0.13 | 13 | Matrix Fibroblast |
| Cav1     | 0.43 | 0.00 | 0.00 | 0.59 | 0.31 | 13 | Matrix Fibroblast |
| Lpp      | 0.79 | 0.00 | 0.00 | 0.42 | 0.21 | 13 | Matrix Fibroblast |
| Rbms3    | 0.52 | 0.00 | 0.00 | 0.37 | 0.16 | 13 | Matrix Fibroblast |
| Tgfb2    | 0.63 | 0.00 | 0.00 | 0.32 | 0.14 | 13 | Matrix Fibroblast |
| Fkbp7    | 0.52 | 0.00 | 0.00 | 0.31 | 0.13 | 13 | Matrix Fibroblast |
| Ptrf     | 0.54 | 0.00 | 0.00 | 0.60 | 0.35 | 13 | Matrix Fibroblast |
| Vcan     | 0.55 | 0.00 | 0.00 | 0.27 | 0.11 | 13 | Matrix Fibroblast |
| Gpx7     | 0.46 | 0.00 | 0.00 | 0.25 | 0.09 | 13 | Matrix Fibroblast |
| Tmed3    | 0.54 | 0.00 | 0.00 | 0.29 | 0.12 | 13 | Matrix Fibroblast |
| Mdk      | 0.43 | 0.00 | 0.00 | 0.40 | 0.18 | 13 | Matrix Fibroblast |
| Pmepa1   | 0.51 | 0.00 | 0.00 | 0.27 | 0.11 | 13 | Matrix Fibroblast |
| Ctsl     | 0.46 | 0.00 | 0.00 | 0.62 | 0.38 | 13 | Matrix Fibroblast |
| Lmna     | 0.54 | 0.00 | 0.00 | 0.40 | 0.20 | 13 | Matrix Fibroblast |

|           |      |      |      |      |      |    |                   |
|-----------|------|------|------|------|------|----|-------------------|
| Nupr1     | 0.54 | 0.00 | 0.00 | 0.38 | 0.18 | 13 | Matrix Fibroblast |
| Dpt       | 0.74 | 0.00 | 0.00 | 0.36 | 0.17 | 13 | Matrix Fibroblast |
| Sdc2      | 0.39 | 0.00 | 0.00 | 0.29 | 0.12 | 13 | Matrix Fibroblast |
| Fgfr1     | 0.42 | 0.00 | 0.00 | 0.26 | 0.10 | 13 | Matrix Fibroblast |
| Pdlim7    | 0.49 | 0.00 | 0.00 | 0.26 | 0.10 | 13 | Matrix Fibroblast |
| Hcfc1r1   | 0.59 | 0.00 | 0.00 | 0.31 | 0.14 | 13 | Matrix Fibroblast |
| Pbx1      | 0.52 | 0.00 | 0.00 | 0.39 | 0.19 | 13 | Matrix Fibroblast |
| Nid1      | 0.50 | 0.00 | 0.00 | 0.43 | 0.23 | 13 | Matrix Fibroblast |
| Anxa5     | 0.45 | 0.00 | 0.00 | 0.61 | 0.40 | 13 | Matrix Fibroblast |
| Rcn1      | 0.51 | 0.00 | 0.00 | 0.31 | 0.14 | 13 | Matrix Fibroblast |
| Dkk3      | 0.41 | 0.00 | 0.00 | 0.28 | 0.11 | 13 | Matrix Fibroblast |
| Nenf      | 0.49 | 0.00 | 0.00 | 0.37 | 0.18 | 13 | Matrix Fibroblast |
| Eid1      | 0.51 | 0.00 | 0.00 | 0.50 | 0.28 | 13 | Matrix Fibroblast |
| Mfap2     | 0.51 | 0.00 | 0.00 | 0.57 | 0.34 | 13 | Matrix Fibroblast |
| Calu      | 0.51 | 0.00 | 0.00 | 0.44 | 0.24 | 13 | Matrix Fibroblast |
| Cbx6      | 0.45 | 0.00 | 0.00 | 0.25 | 0.10 | 13 | Matrix Fibroblast |
| Slmap     | 0.60 | 0.00 | 0.00 | 0.32 | 0.15 | 13 | Matrix Fibroblast |
| Ppic      | 0.45 | 0.00 | 0.00 | 0.60 | 0.38 | 13 | Matrix Fibroblast |
| Cdc42ep3  | 0.63 | 0.00 | 0.00 | 0.30 | 0.14 | 13 | Matrix Fibroblast |
| Nr2f2     | 0.48 | 0.00 | 0.00 | 0.40 | 0.21 | 13 | Matrix Fibroblast |
| Actn1     | 0.66 | 0.00 | 0.00 | 0.40 | 0.22 | 13 | Matrix Fibroblast |
| Nedd4     | 0.39 | 0.00 | 0.00 | 0.74 | 0.53 | 13 | Matrix Fibroblast |
| Daam1     | 0.62 | 0.00 | 0.00 | 0.31 | 0.15 | 13 | Matrix Fibroblast |
| Golim4    | 0.45 | 0.00 | 0.00 | 0.38 | 0.20 | 13 | Matrix Fibroblast |
| Tm4sf1    | 0.31 | 0.00 | 0.00 | 0.41 | 0.21 | 13 | Matrix Fibroblast |
| Peg3      | 0.52 | 0.00 | 0.00 | 0.49 | 0.30 | 13 | Matrix Fibroblast |
| Thra      | 0.42 | 0.00 | 0.00 | 0.34 | 0.17 | 13 | Matrix Fibroblast |
| Gnas      | 0.36 | 0.00 | 0.00 | 0.82 | 0.67 | 13 | Matrix Fibroblast |
| Maged1    | 0.44 | 0.00 | 0.00 | 0.35 | 0.18 | 13 | Matrix Fibroblast |
| Sparcl1   | 0.42 | 0.00 | 0.00 | 0.59 | 0.39 | 13 | Matrix Fibroblast |
| Twsg1     | 0.41 | 0.00 | 0.00 | 0.25 | 0.12 | 13 | Matrix Fibroblast |
| Serpinb6a | 0.42 | 0.00 | 0.00 | 0.34 | 0.18 | 13 | Matrix Fibroblast |
| Svil      | 0.45 | 0.00 | 0.00 | 0.32 | 0.17 | 13 | Matrix Fibroblast |
| P4hb      | 0.41 | 0.00 | 0.00 | 0.57 | 0.40 | 13 | Matrix Fibroblast |
| Laptm4a   | 0.38 | 0.00 | 0.00 | 0.69 | 0.51 | 13 | Matrix Fibroblast |
| Tspan3    | 0.41 | 0.00 | 0.00 | 0.30 | 0.15 | 13 | Matrix Fibroblast |
| Arf4      | 0.44 | 0.00 | 0.00 | 0.43 | 0.27 | 13 | Matrix Fibroblast |
| Rhoj      | 0.37 | 0.00 | 0.00 | 0.34 | 0.18 | 13 | Matrix Fibroblast |
| Filip1l   | 0.45 | 0.00 | 0.00 | 0.50 | 0.33 | 13 | Matrix Fibroblast |
| Hdlbp     | 0.40 | 0.00 | 0.00 | 0.36 | 0.21 | 13 | Matrix Fibroblast |
| Dnajc10   | 0.41 | 0.00 | 0.00 | 0.28 | 0.15 | 13 | Matrix Fibroblast |
| Rps2      | 0.34 | 0.00 | 0.00 | 0.78 | 0.67 | 13 | Matrix Fibroblast |
| S100a10   | 0.43 | 0.00 | 0.00 | 0.54 | 0.38 | 13 | Matrix Fibroblast |

|           |      |      |      |      |      |    |                   |
|-----------|------|------|------|------|------|----|-------------------|
| Sepw1     | 0.40 | 0.00 | 0.00 | 0.34 | 0.19 | 13 | Matrix Fibroblast |
| Ppap2b    | 0.45 | 0.00 | 0.00 | 0.39 | 0.23 | 13 | Matrix Fibroblast |
| Sh3bgrl   | 0.29 | 0.00 | 0.00 | 0.63 | 0.44 | 13 | Matrix Fibroblast |
| Rbpms     | 0.53 | 0.00 | 0.00 | 0.32 | 0.19 | 13 | Matrix Fibroblast |
| Emp3      | 0.35 | 0.00 | 0.00 | 0.36 | 0.21 | 13 | Matrix Fibroblast |
| Arl1      | 0.40 | 0.00 | 0.00 | 0.35 | 0.20 | 13 | Matrix Fibroblast |
| Nfix      | 0.43 | 0.00 | 0.00 | 0.30 | 0.17 | 13 | Matrix Fibroblast |
| Kdelr2    | 0.41 | 0.00 | 0.00 | 0.32 | 0.19 | 13 | Matrix Fibroblast |
| Myadm     | 0.38 | 0.00 | 0.00 | 0.34 | 0.20 | 13 | Matrix Fibroblast |
| Rnase4    | 0.39 | 0.00 | 0.00 | 0.32 | 0.18 | 13 | Matrix Fibroblast |
| Celf2     | 0.31 | 0.00 | 0.00 | 0.45 | 0.28 | 13 | Matrix Fibroblast |
| Tuba1a    | 0.28 | 0.00 | 0.00 | 0.68 | 0.50 | 13 | Matrix Fibroblast |
| Zfhx3     | 0.44 | 0.00 | 0.00 | 0.30 | 0.17 | 13 | Matrix Fibroblast |
| 7-Sep     | 0.29 | 0.00 | 0.00 | 0.73 | 0.58 | 13 | Matrix Fibroblast |
| Serf2     | 0.32 | 0.00 | 0.00 | 0.69 | 0.56 | 13 | Matrix Fibroblast |
| Grb10     | 0.32 | 0.00 | 0.00 | 0.29 | 0.16 | 13 | Matrix Fibroblast |
| Serpine2  | 0.25 | 0.00 | 0.00 | 0.41 | 0.25 | 13 | Matrix Fibroblast |
| Lamc1     | 0.32 | 0.00 | 0.00 | 0.28 | 0.16 | 13 | Matrix Fibroblast |
| Oxct1     | 0.44 | 0.00 | 0.00 | 0.26 | 0.15 | 13 | Matrix Fibroblast |
| Parva     | 0.33 | 0.00 | 0.00 | 0.28 | 0.16 | 13 | Matrix Fibroblast |
| Ppp1cb    | 0.42 | 0.00 | 0.00 | 0.32 | 0.20 | 13 | Matrix Fibroblast |
| Mxra8     | 0.28 | 0.00 | 0.00 | 0.29 | 0.16 | 13 | Matrix Fibroblast |
| Ppib      | 0.33 | 0.00 | 0.00 | 0.57 | 0.43 | 13 | Matrix Fibroblast |
| Ppp1r12a  | 0.54 | 0.00 | 0.00 | 0.37 | 0.25 | 13 | Matrix Fibroblast |
| Nfic      | 0.31 | 0.00 | 0.00 | 0.38 | 0.24 | 13 | Matrix Fibroblast |
| Ckb       | 0.34 | 0.00 | 0.00 | 0.25 | 0.14 | 13 | Matrix Fibroblast |
| Hmgn1     | 0.30 | 0.00 | 0.00 | 0.59 | 0.45 | 13 | Matrix Fibroblast |
| Gabarapl1 | 0.37 | 0.00 | 0.00 | 0.27 | 0.16 | 13 | Matrix Fibroblast |
| Mef2c     | 0.32 | 0.00 | 0.00 | 0.28 | 0.16 | 13 | Matrix Fibroblast |
| Sec61g    | 0.34 | 0.00 | 0.00 | 0.47 | 0.35 | 13 | Matrix Fibroblast |
| Lamb1     | 0.29 | 0.00 | 0.00 | 0.27 | 0.16 | 13 | Matrix Fibroblast |
| Tceal8    | 0.34 | 0.00 | 0.00 | 0.31 | 0.19 | 13 | Matrix Fibroblast |
| Hspa5     | 0.30 | 0.00 | 0.00 | 0.68 | 0.55 | 13 | Matrix Fibroblast |
| Cbx5      | 0.33 | 0.00 | 0.00 | 0.39 | 0.26 | 13 | Matrix Fibroblast |
| Rsu1      | 0.33 | 0.00 | 0.00 | 0.31 | 0.20 | 13 | Matrix Fibroblast |
| Ndufv3    | 0.35 | 0.00 | 0.00 | 0.35 | 0.24 | 13 | Matrix Fibroblast |
| Gm5786    | 0.32 | 0.00 | 0.00 | 0.51 | 0.39 | 13 | Matrix Fibroblast |
| Tbrg1     | 0.29 | 0.00 | 0.00 | 0.43 | 0.30 | 13 | Matrix Fibroblast |
| Sar1a     | 0.29 | 0.00 | 0.00 | 0.31 | 0.20 | 13 | Matrix Fibroblast |
| Gstp1     | 0.27 | 0.00 | 0.00 | 0.31 | 0.19 | 13 | Matrix Fibroblast |
| Sfr1      | 0.29 | 0.00 | 0.00 | 0.46 | 0.33 | 13 | Matrix Fibroblast |
| Ssr4      | 0.31 | 0.00 | 0.00 | 0.36 | 0.24 | 13 | Matrix Fibroblast |
| Ttc3      | 0.27 | 0.00 | 0.00 | 0.42 | 0.29 | 13 | Matrix Fibroblast |

|               |      |      |      |      |      |    |                   |
|---------------|------|------|------|------|------|----|-------------------|
| Calr          | 0.29 | 0.00 | 0.00 | 0.56 | 0.43 | 13 | Matrix Fibroblast |
| Cfl2          | 0.37 | 0.00 | 0.00 | 0.36 | 0.25 | 13 | Matrix Fibroblast |
| Idh2          | 0.31 | 0.00 | 0.00 | 0.30 | 0.19 | 13 | Matrix Fibroblast |
| Morf4l2       | 0.30 | 0.00 | 0.00 | 0.33 | 0.22 | 13 | Matrix Fibroblast |
| Rps2-ps10     | 0.31 | 0.00 | 0.00 | 0.54 | 0.43 | 13 | Matrix Fibroblast |
| Rps2-ps6      | 0.33 | 0.00 | 0.00 | 0.51 | 0.41 | 13 | Matrix Fibroblast |
| Hsp90b1       | 0.34 | 0.00 | 0.00 | 0.84 | 0.76 | 13 | Matrix Fibroblast |
| Ddost         | 0.28 | 0.00 | 0.00 | 0.29 | 0.19 | 13 | Matrix Fibroblast |
| Erlec1        | 0.29 | 0.00 | 0.00 | 0.25 | 0.16 | 13 | Matrix Fibroblast |
| Gm6139        | 0.32 | 0.00 | 0.00 | 0.52 | 0.42 | 13 | Matrix Fibroblast |
| Mif           | 0.29 | 0.00 | 0.00 | 0.29 | 0.19 | 13 | Matrix Fibroblast |
| Prdx4         | 0.27 | 0.00 | 0.00 | 0.26 | 0.16 | 13 | Matrix Fibroblast |
| Copb2         | 0.29 | 0.00 | 0.00 | 0.27 | 0.18 | 13 | Matrix Fibroblast |
| Mrfap1        | 0.28 | 0.00 | 0.00 | 0.44 | 0.33 | 13 | Matrix Fibroblast |
| Ostc          | 0.26 | 0.00 | 0.00 | 0.33 | 0.23 | 13 | Matrix Fibroblast |
| Eprs          | 0.29 | 0.00 | 0.00 | 0.32 | 0.22 | 13 | Matrix Fibroblast |
| Map1lc3a      | 0.25 | 0.00 | 0.00 | 0.30 | 0.20 | 13 | Matrix Fibroblast |
| Htatsf1       | 0.25 | 0.00 | 0.00 | 0.37 | 0.26 | 13 | Matrix Fibroblast |
| 2810428l15Rik | 0.28 | 0.00 | 0.00 | 0.29 | 0.19 | 13 | Matrix Fibroblast |
| Zbtb20        | 0.32 | 0.00 | 0.00 | 0.37 | 0.27 | 13 | Matrix Fibroblast |
| Atp5g1        | 0.30 | 0.00 | 0.00 | 0.32 | 0.22 | 13 | Matrix Fibroblast |
| Cdkn1c        | 0.27 | 0.00 | 0.00 | 0.27 | 0.18 | 13 | Matrix Fibroblast |
| Gm18025       | 0.26 | 0.00 | 0.00 | 0.28 | 0.20 | 13 | Matrix Fibroblast |
| Gm6576        | 0.27 | 0.00 | 0.00 | 0.40 | 0.31 | 13 | Matrix Fibroblast |
| Hist1h2ap     | 2.56 | 0.00 | 0.00 | 0.79 | 0.13 | 14 | Endothelial       |
| Hist1h2ao     | 2.56 | 0.00 | 0.00 | 0.79 | 0.13 | 14 | Endothelial       |
| Hist1h2ag     | 2.41 | 0.00 | 0.00 | 0.72 | 0.10 | 14 | Endothelial       |
| Hist1h2ac     | 2.31 | 0.00 | 0.00 | 0.69 | 0.09 | 14 | Endothelial       |
| Hist1h2ad     | 2.29 | 0.00 | 0.00 | 0.69 | 0.09 | 14 | Endothelial       |
| Hist1h2ai     | 2.26 | 0.00 | 0.00 | 0.67 | 0.08 | 14 | Endothelial       |
| Hist1h2ah     | 2.23 | 0.00 | 0.00 | 0.66 | 0.08 | 14 | Endothelial       |
| Hist1h2af     | 2.20 | 0.00 | 0.00 | 0.66 | 0.07 | 14 | Endothelial       |
| Hist1h2an     | 2.19 | 0.00 | 0.00 | 0.64 | 0.07 | 14 | Endothelial       |
| Hist1h2ae     | 2.15 | 0.00 | 0.00 | 0.61 | 0.07 | 14 | Endothelial       |
| Hist1h2ab     | 2.11 | 0.00 | 0.00 | 0.62 | 0.08 | 14 | Endothelial       |
| Cenpf         | 2.07 | 0.00 | 0.00 | 0.68 | 0.06 | 14 | Endothelial       |
| Top2a         | 2.05 | 0.00 | 0.00 | 0.79 | 0.09 | 14 | Endothelial       |
| Mki67         | 2.05 | 0.00 | 0.00 | 0.81 | 0.10 | 14 | Endothelial       |
| Hist1h2ak     | 1.97 | 0.00 | 0.00 | 0.58 | 0.06 | 14 | Endothelial       |
| Prc1          | 1.80 | 0.00 | 0.00 | 0.59 | 0.05 | 14 | Endothelial       |
| Cenpe         | 1.76 | 0.00 | 0.00 | 0.62 | 0.06 | 14 | Endothelial       |
| Hmgb2         | 1.76 | 0.00 | 0.00 | 0.96 | 0.41 | 14 | Endothelial       |
| H2afx         | 1.68 | 0.00 | 0.00 | 0.62 | 0.08 | 14 | Endothelial       |

|               |      |      |      |      |      |    |             |
|---------------|------|------|------|------|------|----|-------------|
| Nusap1        | 1.67 | 0.00 | 0.00 | 0.57 | 0.04 | 14 | Endothelial |
| Smc2          | 1.66 | 0.00 | 0.00 | 0.72 | 0.12 | 14 | Endothelial |
| Birc5         | 1.55 | 0.00 | 0.00 | 0.61 | 0.05 | 14 | Endothelial |
| Stmn1         | 1.54 | 0.00 | 0.00 | 0.83 | 0.22 | 14 | Endothelial |
| 2810417H13Rik | 1.53 | 0.00 | 0.00 | 0.62 | 0.07 | 14 | Endothelial |
| Tpx2          | 1.49 | 0.00 | 0.00 | 0.55 | 0.04 | 14 | Endothelial |
| Ube2c         | 1.48 | 0.00 | 0.00 | 0.46 | 0.04 | 14 | Endothelial |
| Ccnb2         | 1.46 | 0.00 | 0.00 | 0.51 | 0.05 | 14 | Endothelial |
| Cdc20         | 1.44 | 0.00 | 0.00 | 0.46 | 0.04 | 14 | Endothelial |
| Ckap2         | 1.42 | 0.00 | 0.00 | 0.48 | 0.03 | 14 | Endothelial |
| Kif23         | 1.41 | 0.00 | 0.00 | 0.50 | 0.04 | 14 | Endothelial |
| Cenpa         | 1.39 | 0.00 | 0.00 | 0.48 | 0.05 | 14 | Endothelial |
| Cks2          | 1.35 | 0.00 | 0.00 | 0.52 | 0.07 | 14 | Endothelial |
| Kif20b        | 1.33 | 0.00 | 0.00 | 0.49 | 0.05 | 14 | Endothelial |
| Ckap2l        | 1.33 | 0.00 | 0.00 | 0.48 | 0.03 | 14 | Endothelial |
| Gm10282       | 1.31 | 0.00 | 0.00 | 0.87 | 0.39 | 14 | Endothelial |
| Hmgn2         | 1.31 | 0.00 | 0.00 | 0.88 | 0.42 | 14 | Endothelial |
| Hmmr          | 1.30 | 0.00 | 0.00 | 0.42 | 0.03 | 14 | Endothelial |
| Incenp        | 1.29 | 0.00 | 0.00 | 0.52 | 0.07 | 14 | Endothelial |
| Spc25         | 1.27 | 0.00 | 0.00 | 0.46 | 0.04 | 14 | Endothelial |
| D17H6S56E-5   | 1.24 | 0.00 | 0.00 | 0.58 | 0.09 | 14 | Endothelial |
| Cdca8         | 1.24 | 0.00 | 0.00 | 0.46 | 0.04 | 14 | Endothelial |
| Smc4          | 1.22 | 0.00 | 0.00 | 0.83 | 0.33 | 14 | Endothelial |
| H2afz         | 1.21 | 0.00 | 0.00 | 0.86 | 0.39 | 14 | Endothelial |
| Rrm2          | 1.21 | 0.00 | 0.00 | 0.42 | 0.04 | 14 | Endothelial |
| Sgol2         | 1.20 | 0.00 | 0.00 | 0.39 | 0.03 | 14 | Endothelial |
| Cdk1          | 1.18 | 0.00 | 0.00 | 0.47 | 0.04 | 14 | Endothelial |
| Pbk           | 1.17 | 0.00 | 0.00 | 0.39 | 0.02 | 14 | Endothelial |
| Egfl7         | 1.16 | 0.00 | 0.00 | 0.90 | 0.26 | 14 | Endothelial |
| Casc5         | 1.16 | 0.00 | 0.00 | 0.41 | 0.04 | 14 | Endothelial |
| Tuba1b        | 1.15 | 0.00 | 0.00 | 0.87 | 0.44 | 14 | Endothelial |
| Cd93          | 1.15 | 0.00 | 0.00 | 0.80 | 0.20 | 14 | Endothelial |
| Esco2         | 1.14 | 0.00 | 0.00 | 0.36 | 0.03 | 14 | Endothelial |
| Anln          | 1.14 | 0.00 | 0.00 | 0.39 | 0.02 | 14 | Endothelial |
| Hist1h1b      | 1.13 | 0.00 | 0.00 | 0.33 | 0.03 | 14 | Endothelial |
| Tacc3         | 1.12 | 0.00 | 0.00 | 0.43 | 0.05 | 14 | Endothelial |
| Hjurp         | 1.11 | 0.00 | 0.00 | 0.55 | 0.13 | 14 | Endothelial |
| Diap3         | 1.11 | 0.00 | 0.00 | 0.43 | 0.05 | 14 | Endothelial |
| Lmnbl1        | 1.09 | 0.00 | 0.00 | 0.47 | 0.07 | 14 | Endothelial |
| Fam64a        | 1.09 | 0.00 | 0.00 | 0.34 | 0.01 | 14 | Endothelial |
| Nuf2          | 1.08 | 0.00 | 0.00 | 0.36 | 0.02 | 14 | Endothelial |
| Kif15         | 1.07 | 0.00 | 0.00 | 0.40 | 0.04 | 14 | Endothelial |
| Cep55         | 1.05 | 0.00 | 0.00 | 0.34 | 0.02 | 14 | Endothelial |

|               |      |      |      |      |      |    |             |
|---------------|------|------|------|------|------|----|-------------|
| Ccna2         | 1.04 | 0.00 | 0.00 | 0.39 | 0.03 | 14 | Endothelial |
| Slfn9         | 1.04 | 0.00 | 0.00 | 0.30 | 0.03 | 14 | Endothelial |
| Fbxo5         | 1.04 | 0.00 | 0.00 | 0.38 | 0.04 | 14 | Endothelial |
| Kif11         | 1.03 | 0.00 | 0.00 | 0.36 | 0.03 | 14 | Endothelial |
| Atad2         | 1.02 | 0.00 | 0.00 | 0.41 | 0.07 | 14 | Endothelial |
| Tmpo          | 1.02 | 0.00 | 0.00 | 0.55 | 0.14 | 14 | Endothelial |
| Scn7a         | 1.02 | 0.00 | 0.00 | 0.88 | 0.28 | 14 | Endothelial |
| Pcdh17        | 1.02 | 0.00 | 0.00 | 0.73 | 0.19 | 14 | Endothelial |
| Aspm          | 1.01 | 0.00 | 0.00 | 0.30 | 0.02 | 14 | Endothelial |
| Hpgd          | 1.00 | 0.00 | 0.00 | 0.76 | 0.25 | 14 | Endothelial |
| Cks1b         | 1.00 | 0.00 | 0.00 | 0.46 | 0.08 | 14 | Endothelial |
| Tmem100       | 1.00 | 0.00 | 0.00 | 0.85 | 0.28 | 14 | Endothelial |
| Ncapg         | 0.99 | 0.00 | 0.00 | 0.39 | 0.04 | 14 | Endothelial |
| RP23-45G16.5  | 0.98 | 0.00 | 0.00 | 0.38 | 0.04 | 14 | Endothelial |
| Hirip3        | 0.98 | 0.00 | 0.00 | 0.41 | 0.08 | 14 | Endothelial |
| Ccdc34        | 0.98 | 0.00 | 0.00 | 0.53 | 0.13 | 14 | Endothelial |
| Tk1           | 0.98 | 0.00 | 0.00 | 0.34 | 0.03 | 14 | Endothelial |
| Cenpq         | 0.97 | 0.00 | 0.00 | 0.39 | 0.06 | 14 | Endothelial |
| Ndc80         | 0.97 | 0.00 | 0.00 | 0.37 | 0.03 | 14 | Endothelial |
| Ripply3       | 0.97 | 0.00 | 0.00 | 0.55 | 0.12 | 14 | Endothelial |
| Racgap1       | 0.96 | 0.00 | 0.00 | 0.36 | 0.03 | 14 | Endothelial |
| Knstrn        | 0.96 | 0.00 | 0.00 | 0.34 | 0.03 | 14 | Endothelial |
| Ptprb         | 0.94 | 0.00 | 0.00 | 0.78 | 0.20 | 14 | Endothelial |
| Cdh5          | 0.93 | 0.00 | 0.00 | 0.80 | 0.21 | 14 | Endothelial |
| Neil3         | 0.93 | 0.00 | 0.00 | 0.30 | 0.02 | 14 | Endothelial |
| Gpihbp1       | 0.93 | 0.00 | 0.00 | 0.63 | 0.15 | 14 | Endothelial |
| Clspn         | 0.91 | 0.00 | 0.00 | 0.31 | 0.04 | 14 | Endothelial |
| Ncapd2        | 0.90 | 0.00 | 0.00 | 0.35 | 0.04 | 14 | Endothelial |
| Pecam1        | 0.89 | 0.00 | 0.00 | 0.77 | 0.23 | 14 | Endothelial |
| Mis18bp1      | 0.89 | 0.00 | 0.00 | 0.31 | 0.03 | 14 | Endothelial |
| Trim59        | 0.89 | 0.00 | 0.00 | 0.31 | 0.04 | 14 | Endothelial |
| Ccne2         | 0.88 | 0.00 | 0.00 | 0.26 | 0.03 | 14 | Endothelial |
| Calcr1        | 0.87 | 0.00 | 0.00 | 0.80 | 0.24 | 14 | Endothelial |
| Spc24         | 0.87 | 0.00 | 0.00 | 0.34 | 0.04 | 14 | Endothelial |
| Rasgrp3       | 0.85 | 0.00 | 0.00 | 0.52 | 0.12 | 14 | Endothelial |
| C330027C09Rik | 0.85 | 0.00 | 0.00 | 0.27 | 0.02 | 14 | Endothelial |
| Plvap         | 0.83 | 0.00 | 0.00 | 0.52 | 0.12 | 14 | Endothelial |
| Sgol1         | 0.82 | 0.00 | 0.00 | 0.28 | 0.02 | 14 | Endothelial |
| Clec14a       | 0.81 | 0.00 | 0.00 | 0.63 | 0.16 | 14 | Endothelial |
| Tyms          | 0.81 | 0.00 | 0.00 | 0.32 | 0.05 | 14 | Endothelial |
| Cenpw         | 0.78 | 0.00 | 0.00 | 0.31 | 0.04 | 14 | Endothelial |
| Cdca3         | 0.78 | 0.00 | 0.00 | 0.29 | 0.03 | 14 | Endothelial |
| Aurkb         | 0.77 | 0.00 | 0.00 | 0.27 | 0.02 | 14 | Endothelial |

|               |      |      |      |      |      |    |             |
|---------------|------|------|------|------|------|----|-------------|
| Kif22         | 0.74 | 0.00 | 0.00 | 0.26 | 0.02 | 14 | Endothelial |
| Bub1          | 0.74 | 0.00 | 0.00 | 0.25 | 0.02 | 14 | Endothelial |
| Lyve1         | 0.71 | 0.00 | 0.00 | 0.73 | 0.21 | 14 | Endothelial |
| Rad51ap1      | 0.71 | 0.00 | 0.00 | 0.27 | 0.03 | 14 | Endothelial |
| Hist2h2ab     | 0.78 | 0.00 | 0.00 | 0.26 | 0.04 | 14 | Endothelial |
| Cyyr1         | 0.84 | 0.00 | 0.00 | 0.55 | 0.14 | 14 | Endothelial |
| Epas1         | 0.85 | 0.00 | 0.00 | 0.75 | 0.24 | 14 | Endothelial |
| Sox17         | 0.78 | 0.00 | 0.00 | 0.53 | 0.13 | 14 | Endothelial |
| Anp32e        | 1.07 | 0.00 | 0.00 | 0.73 | 0.27 | 14 | Endothelial |
| Mest          | 0.87 | 0.00 | 0.00 | 0.64 | 0.19 | 14 | Endothelial |
| BC028528      | 0.85 | 0.00 | 0.00 | 0.78 | 0.28 | 14 | Endothelial |
| Cit           | 0.66 | 0.00 | 0.00 | 0.27 | 0.04 | 14 | Endothelial |
| Tubb6         | 0.80 | 0.00 | 0.00 | 0.36 | 0.07 | 14 | Endothelial |
| Sdpr          | 0.92 | 0.00 | 0.00 | 0.94 | 0.51 | 14 | Endothelial |
| Cldn5         | 0.69 | 0.00 | 0.00 | 0.71 | 0.21 | 14 | Endothelial |
| Ramp2         | 0.67 | 0.00 | 0.00 | 0.80 | 0.27 | 14 | Endothelial |
| Ecscr         | 0.72 | 0.00 | 0.00 | 0.59 | 0.16 | 14 | Endothelial |
| Gpr116        | 0.83 | 0.00 | 0.00 | 0.87 | 0.36 | 14 | Endothelial |
| Tspan13       | 0.78 | 0.00 | 0.00 | 0.72 | 0.24 | 14 | Endothelial |
| Plk4          | 0.62 | 0.00 | 0.00 | 0.26 | 0.04 | 14 | Endothelial |
| Erg           | 0.78 | 0.00 | 0.00 | 0.50 | 0.12 | 14 | Endothelial |
| Tie1          | 0.72 | 0.00 | 0.00 | 0.46 | 0.10 | 14 | Endothelial |
| Tek           | 0.73 | 0.00 | 0.00 | 0.49 | 0.12 | 14 | Endothelial |
| Ctla2a        | 0.74 | 0.00 | 0.00 | 0.64 | 0.19 | 14 | Endothelial |
| Flt1          | 0.73 | 0.00 | 0.00 | 0.54 | 0.14 | 14 | Endothelial |
| Tspan7        | 0.72 | 0.00 | 0.00 | 0.66 | 0.20 | 14 | Endothelial |
| Myzap         | 0.71 | 0.00 | 0.00 | 0.52 | 0.13 | 14 | Endothelial |
| 2810025M15Rik | 0.76 | 0.00 | 0.00 | 0.47 | 0.11 | 14 | Endothelial |
| Gmnn          | 0.77 | 0.00 | 0.00 | 0.34 | 0.06 | 14 | Endothelial |
| Ncapd3        | 0.78 | 0.00 | 0.00 | 0.29 | 0.05 | 14 | Endothelial |
| Hist1h1e      | 1.32 | 0.00 | 0.00 | 0.52 | 0.15 | 14 | Endothelial |
| Tubb5         | 1.04 | 0.00 | 0.00 | 0.82 | 0.43 | 14 | Endothelial |
| 2700094K13Rik | 0.94 | 0.00 | 0.00 | 0.53 | 0.15 | 14 | Endothelial |
| Ppap2a        | 0.75 | 0.00 | 0.00 | 0.60 | 0.18 | 14 | Endothelial |
| Ptma          | 0.67 | 0.00 | 0.00 | 0.99 | 0.91 | 14 | Endothelial |
| Ncaph         | 0.61 | 0.00 | 0.00 | 0.26 | 0.04 | 14 | Endothelial |
| H2-Q7         | 0.83 | 0.00 | 0.00 | 0.34 | 0.07 | 14 | Endothelial |
| Nsg1          | 0.68 | 0.00 | 0.00 | 0.37 | 0.08 | 14 | Endothelial |
| Ckap5         | 0.90 | 0.00 | 0.00 | 0.43 | 0.11 | 14 | Endothelial |
| Myct1         | 0.71 | 0.00 | 0.00 | 0.49 | 0.12 | 14 | Endothelial |
| Kpna2         | 0.80 | 0.00 | 0.00 | 0.30 | 0.06 | 14 | Endothelial |
| Rad21         | 0.97 | 0.00 | 0.00 | 0.63 | 0.22 | 14 | Endothelial |
| Dbf4          | 0.65 | 0.00 | 0.00 | 0.28 | 0.05 | 14 | Endothelial |

|           |      |      |      |      |      |    |             |
|-----------|------|------|------|------|------|----|-------------|
| Kit       | 0.63 | 0.00 | 0.00 | 0.37 | 0.08 | 14 | Endothelial |
| Kdr       | 0.63 | 0.00 | 0.00 | 0.55 | 0.15 | 14 | Endothelial |
| Tnfsf10   | 0.65 | 0.00 | 0.00 | 0.38 | 0.08 | 14 | Endothelial |
| Ushbp1    | 0.65 | 0.00 | 0.00 | 0.38 | 0.08 | 14 | Endothelial |
| Gm10184   | 0.83 | 0.00 | 0.00 | 0.31 | 0.06 | 14 | Endothelial |
| Hist1h1d  | 1.04 | 0.00 | 0.00 | 0.39 | 0.09 | 14 | Endothelial |
| Sema3g    | 0.67 | 0.00 | 0.00 | 0.33 | 0.07 | 14 | Endothelial |
| Slc43a3   | 0.77 | 0.00 | 0.00 | 0.63 | 0.21 | 14 | Endothelial |
| Rangap1   | 0.71 | 0.00 | 0.00 | 0.34 | 0.07 | 14 | Endothelial |
| Icam2     | 0.66 | 0.00 | 0.00 | 0.54 | 0.15 | 14 | Endothelial |
| Palmd     | 0.80 | 0.00 | 0.00 | 0.46 | 0.12 | 14 | Endothelial |
| Aplnr     | 0.57 | 0.00 | 0.00 | 0.33 | 0.06 | 14 | Endothelial |
| Nucks1    | 0.92 | 0.00 | 0.00 | 0.69 | 0.27 | 14 | Endothelial |
| Emcn      | 0.62 | 0.00 | 0.00 | 0.43 | 0.10 | 14 | Endothelial |
| Tspan18   | 0.66 | 0.00 | 0.00 | 0.48 | 0.13 | 14 | Endothelial |
| Hist2h2ac | 0.88 | 0.00 | 0.00 | 0.30 | 0.06 | 14 | Endothelial |
| Ece1      | 0.76 | 0.00 | 0.00 | 0.68 | 0.24 | 14 | Endothelial |
| Tmem88    | 0.66 | 0.00 | 0.00 | 0.41 | 0.10 | 14 | Endothelial |
| Gm10259   | 0.73 | 0.00 | 0.00 | 0.29 | 0.05 | 14 | Endothelial |
| Ska2      | 0.66 | 0.00 | 0.00 | 0.30 | 0.06 | 14 | Endothelial |
| Esam      | 0.68 | 0.00 | 0.00 | 0.56 | 0.17 | 14 | Endothelial |
| Hn1       | 0.83 | 0.00 | 0.00 | 0.56 | 0.19 | 14 | Endothelial |
| Arhgef15  | 0.60 | 0.00 | 0.00 | 0.33 | 0.07 | 14 | Endothelial |
| Nostrin   | 0.71 | 0.00 | 0.00 | 0.50 | 0.14 | 14 | Endothelial |
| S100a16   | 0.76 | 0.00 | 0.00 | 0.64 | 0.23 | 14 | Endothelial |
| Tuba1c    | 0.93 | 0.00 | 0.00 | 0.70 | 0.31 | 14 | Endothelial |
| G2e3      | 0.73 | 0.00 | 0.00 | 0.29 | 0.06 | 14 | Endothelial |
| Acvrl1    | 0.63 | 0.00 | 0.00 | 0.55 | 0.17 | 14 | Endothelial |
| Clec1a    | 0.59 | 0.00 | 0.00 | 0.53 | 0.16 | 14 | Endothelial |
| Podxl     | 0.61 | 0.00 | 0.00 | 0.41 | 0.10 | 14 | Endothelial |
| Ldb2      | 0.69 | 0.00 | 0.00 | 0.52 | 0.15 | 14 | Endothelial |
| Prim1     | 0.65 | 0.00 | 0.00 | 0.26 | 0.05 | 14 | Endothelial |
| She       | 0.51 | 0.00 | 0.00 | 0.28 | 0.05 | 14 | Endothelial |
| Eng       | 0.68 | 0.00 | 0.00 | 0.41 | 0.11 | 14 | Endothelial |
| Dek       | 0.97 | 0.00 | 0.00 | 0.83 | 0.49 | 14 | Endothelial |
| Armxc4    | 0.66 | 0.00 | 0.00 | 0.33 | 0.07 | 14 | Endothelial |
| Cd34      | 0.69 | 0.00 | 0.00 | 0.57 | 0.19 | 14 | Endothelial |
| Piezo2    | 0.67 | 0.00 | 0.00 | 0.41 | 0.11 | 14 | Endothelial |
| Sgk1      | 0.72 | 0.00 | 0.00 | 0.54 | 0.18 | 14 | Endothelial |
| Tm4sf1    | 0.58 | 0.00 | 0.00 | 0.61 | 0.20 | 14 | Endothelial |
| Ran       | 0.83 | 0.00 | 0.00 | 0.76 | 0.37 | 14 | Endothelial |
| Rrm1      | 0.61 | 0.00 | 0.00 | 0.29 | 0.06 | 14 | Endothelial |
| Lig1      | 0.79 | 0.00 | 0.00 | 0.36 | 0.09 | 14 | Endothelial |

|            |      |      |      |      |      |    |             |
|------------|------|------|------|------|------|----|-------------|
| Gata2      | 0.58 | 0.00 | 0.00 | 0.46 | 0.13 | 14 | Endothelial |
| Afap1l1    | 0.70 | 0.00 | 0.00 | 0.52 | 0.17 | 14 | Endothelial |
| Whsc1      | 0.79 | 0.00 | 0.00 | 0.44 | 0.13 | 14 | Endothelial |
| Stmn2      | 0.70 | 0.00 | 0.00 | 0.48 | 0.15 | 14 | Endothelial |
| Srgn       | 0.62 | 0.00 | 0.00 | 0.75 | 0.32 | 14 | Endothelial |
| Ehd4       | 0.68 | 0.00 | 0.00 | 0.68 | 0.27 | 14 | Endothelial |
| Emp1       | 0.71 | 0.00 | 0.00 | 0.58 | 0.21 | 14 | Endothelial |
| Myef2      | 0.75 | 0.00 | 0.00 | 0.47 | 0.15 | 14 | Endothelial |
| Ddah1      | 0.50 | 0.00 | 0.00 | 0.27 | 0.06 | 14 | Endothelial |
| H1f0       | 0.98 | 0.00 | 0.00 | 0.62 | 0.26 | 14 | Endothelial |
| Itga6      | 0.64 | 0.00 | 0.00 | 0.43 | 0.13 | 14 | Endothelial |
| Hmgb1      | 0.74 | 0.00 | 0.00 | 0.88 | 0.60 | 14 | Endothelial |
| Gng11      | 0.68 | 0.00 | 0.00 | 0.68 | 0.28 | 14 | Endothelial |
| Cav1       | 0.61 | 0.00 | 0.00 | 0.73 | 0.30 | 14 | Endothelial |
| Sema3c     | 0.78 | 0.00 | 0.00 | 0.53 | 0.19 | 14 | Endothelial |
| Fbln2      | 0.50 | 0.00 | 0.00 | 0.29 | 0.07 | 14 | Endothelial |
| Rasip1     | 0.54 | 0.00 | 0.00 | 0.41 | 0.11 | 14 | Endothelial |
| Gm9833     | 0.64 | 0.00 | 0.00 | 0.38 | 0.11 | 14 | Endothelial |
| Ddah2      | 0.74 | 0.00 | 0.00 | 0.62 | 0.25 | 14 | Endothelial |
| Id3        | 0.66 | 0.00 | 0.00 | 0.83 | 0.44 | 14 | Endothelial |
| Arap3      | 0.49 | 0.00 | 0.00 | 0.30 | 0.07 | 14 | Endothelial |
| H2-Q4      | 0.60 | 0.00 | 0.00 | 0.27 | 0.06 | 14 | Endothelial |
| Hist2h2aa2 | 0.98 | 0.00 | 0.00 | 0.41 | 0.13 | 14 | Endothelial |
| Kitl       | 0.51 | 0.00 | 0.00 | 0.59 | 0.21 | 14 | Endothelial |
| Mcam       | 0.53 | 0.00 | 0.00 | 0.43 | 0.12 | 14 | Endothelial |
| Ezh2       | 0.77 | 0.00 | 0.00 | 0.51 | 0.18 | 14 | Endothelial |
| Nav1       | 0.59 | 0.00 | 0.00 | 0.38 | 0.11 | 14 | Endothelial |
| Ptprg      | 0.63 | 0.00 | 0.00 | 0.40 | 0.12 | 14 | Endothelial |
| Anp32a     | 0.69 | 0.00 | 0.00 | 0.87 | 0.59 | 14 | Endothelial |
| Elk3       | 0.59 | 0.00 | 0.00 | 0.43 | 0.13 | 14 | Endothelial |
| Tubb4b     | 0.67 | 0.00 | 0.00 | 0.51 | 0.18 | 14 | Endothelial |
| Lbr        | 0.63 | 0.00 | 0.00 | 0.39 | 0.12 | 14 | Endothelial |
| Col4a2     | 0.64 | 0.00 | 0.00 | 0.80 | 0.42 | 14 | Endothelial |
| Mcm3       | 0.63 | 0.00 | 0.00 | 0.28 | 0.07 | 14 | Endothelial |
| Tbx3       | 0.59 | 0.00 | 0.00 | 0.55 | 0.20 | 14 | Endothelial |
| Eltd1      | 0.47 | 0.00 | 0.00 | 0.28 | 0.06 | 14 | Endothelial |
| Col4a1     | 0.66 | 0.00 | 0.00 | 0.85 | 0.48 | 14 | Endothelial |
| Tuba1a     | 0.66 | 0.00 | 0.00 | 0.85 | 0.50 | 14 | Endothelial |
| Fendrr     | 0.63 | 0.00 | 0.00 | 0.54 | 0.19 | 14 | Endothelial |
| Adcy4      | 0.53 | 0.00 | 0.00 | 0.32 | 0.08 | 14 | Endothelial |
| Usp1       | 0.75 | 0.00 | 0.00 | 0.44 | 0.15 | 14 | Endothelial |
| Ccnd1      | 0.73 | 0.00 | 0.00 | 0.51 | 0.18 | 14 | Endothelial |
| Nasp       | 0.79 | 0.00 | 0.00 | 0.51 | 0.19 | 14 | Endothelial |

|               |      |      |      |      |      |    |             |
|---------------|------|------|------|------|------|----|-------------|
| Prx           | 0.51 | 0.00 | 0.00 | 0.36 | 0.10 | 14 | Endothelial |
| Ly6e          | 0.60 | 0.00 | 0.00 | 0.81 | 0.41 | 14 | Endothelial |
| Gimap1        | 0.53 | 0.00 | 0.00 | 0.43 | 0.13 | 14 | Endothelial |
| Hmgb3         | 0.65 | 0.00 | 0.00 | 0.43 | 0.14 | 14 | Endothelial |
| Dnajc9        | 0.64 | 0.00 | 0.00 | 0.38 | 0.11 | 14 | Endothelial |
| Tubb2a        | 0.66 | 0.00 | 0.00 | 0.54 | 0.21 | 14 | Endothelial |
| Bst2          | 0.59 | 0.00 | 0.00 | 0.42 | 0.13 | 14 | Endothelial |
| Stard4        | 0.60 | 0.00 | 0.00 | 0.34 | 0.09 | 14 | Endothelial |
| Gm6104        | 0.63 | 0.00 | 0.00 | 0.39 | 0.12 | 14 | Endothelial |
| Pcdh1         | 0.46 | 0.00 | 0.00 | 0.28 | 0.07 | 14 | Endothelial |
| Cav2          | 0.55 | 0.00 | 0.00 | 0.52 | 0.18 | 14 | Endothelial |
| Hist1h1c      | 0.86 | 0.00 | 0.00 | 0.36 | 0.11 | 14 | Endothelial |
| Klhl5         | 0.60 | 0.00 | 0.00 | 0.43 | 0.14 | 14 | Endothelial |
| Gimap4        | 0.52 | 0.00 | 0.00 | 0.50 | 0.17 | 14 | Endothelial |
| Cenpc1        | 0.63 | 0.00 | 0.00 | 0.31 | 0.08 | 14 | Endothelial |
| Nde1          | 0.53 | 0.00 | 0.00 | 0.26 | 0.06 | 14 | Endothelial |
| Slc29a1       | 0.53 | 0.00 | 0.00 | 0.30 | 0.08 | 14 | Endothelial |
| Fkbp1a        | 0.64 | 0.00 | 0.00 | 0.75 | 0.40 | 14 | Endothelial |
| Foxf1         | 0.52 | 0.00 | 0.00 | 0.38 | 0.11 | 14 | Endothelial |
| Ace           | 0.53 | 0.00 | 0.00 | 0.42 | 0.13 | 14 | Endothelial |
| S1pr1         | 0.56 | 0.00 | 0.00 | 0.51 | 0.18 | 14 | Endothelial |
| Dnmt1         | 0.66 | 0.00 | 0.00 | 0.34 | 0.10 | 14 | Endothelial |
| Pcna          | 0.87 | 0.00 | 0.00 | 0.46 | 0.17 | 14 | Endothelial |
| Pcna-ps2      | 0.88 | 0.00 | 0.00 | 0.46 | 0.17 | 14 | Endothelial |
| Fli1          | 0.54 | 0.00 | 0.00 | 0.37 | 0.11 | 14 | Endothelial |
| Casz1         | 0.55 | 0.00 | 0.00 | 0.41 | 0.13 | 14 | Endothelial |
| Ccdc85b       | 0.54 | 0.00 | 0.00 | 0.37 | 0.11 | 14 | Endothelial |
| Tmem2         | 0.51 | 0.00 | 0.00 | 0.43 | 0.14 | 14 | Endothelial |
| Calm2         | 0.64 | 0.00 | 0.00 | 0.88 | 0.63 | 14 | Endothelial |
| Tubb2b        | 0.56 | 0.00 | 0.00 | 0.39 | 0.12 | 14 | Endothelial |
| Klf4          | 0.56 | 0.00 | 0.00 | 0.56 | 0.22 | 14 | Endothelial |
| Prcp          | 0.53 | 0.00 | 0.00 | 0.32 | 0.09 | 14 | Endothelial |
| Rnf144a       | 0.56 | 0.00 | 0.00 | 0.44 | 0.15 | 14 | Endothelial |
| Jup           | 0.50 | 0.00 | 0.00 | 0.45 | 0.15 | 14 | Endothelial |
| Tpm4          | 0.60 | 0.00 | 0.00 | 0.82 | 0.48 | 14 | Endothelial |
| Ppia          | 0.57 | 0.00 | 0.00 | 0.93 | 0.79 | 14 | Endothelial |
| Arhgap29      | 0.61 | 0.00 | 0.00 | 0.53 | 0.21 | 14 | Endothelial |
| 5830418K08Rik | 0.59 | 0.00 | 0.00 | 0.30 | 0.08 | 14 | Endothelial |
| Hnrnpa2b1     | 0.58 | 0.00 | 0.00 | 0.92 | 0.71 | 14 | Endothelial |
| Lxn           | 0.50 | 0.00 | 0.00 | 0.37 | 0.11 | 14 | Endothelial |
| Aqp1          | 0.43 | 0.00 | 0.00 | 0.51 | 0.19 | 14 | Endothelial |
| Slco2a1       | 0.46 | 0.00 | 0.00 | 0.35 | 0.11 | 14 | Endothelial |
| 10-Sep        | 0.53 | 0.00 | 0.00 | 0.31 | 0.09 | 14 | Endothelial |

|          |      |      |      |      |      |    |             |
|----------|------|------|------|------|------|----|-------------|
| Id1      | 0.58 | 0.00 | 0.00 | 0.56 | 0.23 | 14 | Endothelial |
| Lsm2     | 0.51 | 0.00 | 0.00 | 0.30 | 0.08 | 14 | Endothelial |
| H2afv    | 0.68 | 0.00 | 0.00 | 0.60 | 0.27 | 14 | Endothelial |
| Thbd     | 0.52 | 0.00 | 0.00 | 0.59 | 0.24 | 14 | Endothelial |
| Ahr      | 0.45 | 0.00 | 0.00 | 0.32 | 0.09 | 14 | Endothelial |
| Tipin    | 0.57 | 0.00 | 0.00 | 0.32 | 0.10 | 14 | Endothelial |
| Cdkn2d   | 0.53 | 0.00 | 0.00 | 0.25 | 0.06 | 14 | Endothelial |
| Edn1     | 0.53 | 0.00 | 0.00 | 0.32 | 0.09 | 14 | Endothelial |
| Gm10123  | 0.55 | 0.00 | 0.00 | 0.92 | 0.81 | 14 | Endothelial |
| Rgs12    | 0.48 | 0.00 | 0.00 | 0.37 | 0.12 | 14 | Endothelial |
| Pde4b    | 0.54 | 0.00 | 0.00 | 0.40 | 0.13 | 14 | Endothelial |
| Cdk5rap2 | 0.54 | 0.00 | 0.00 | 0.30 | 0.09 | 14 | Endothelial |
| Crip2    | 0.54 | 0.00 | 0.00 | 0.76 | 0.40 | 14 | Endothelial |
| Rapgef5  | 0.50 | 0.00 | 0.00 | 0.33 | 0.10 | 14 | Endothelial |
| Ets1     | 0.49 | 0.00 | 0.00 | 0.57 | 0.24 | 14 | Endothelial |
| Arl4c    | 0.57 | 0.00 | 0.00 | 0.32 | 0.10 | 14 | Endothelial |
| Bmpr2    | 0.50 | 0.00 | 0.00 | 0.31 | 0.09 | 14 | Endothelial |
| Ly6a     | 0.34 | 0.00 | 0.00 | 0.50 | 0.19 | 14 | Endothelial |
| Cd36     | 0.51 | 0.00 | 0.00 | 0.68 | 0.32 | 14 | Endothelial |
| Lphn2    | 0.51 | 0.00 | 0.00 | 0.38 | 0.13 | 14 | Endothelial |
| Rdx      | 0.63 | 0.00 | 0.00 | 0.74 | 0.44 | 14 | Endothelial |
| Gm12355  | 0.58 | 0.00 | 0.00 | 0.56 | 0.25 | 14 | Endothelial |
| Ptpm     | 0.46 | 0.00 | 0.00 | 0.31 | 0.09 | 14 | Endothelial |
| Rgcc     | 0.37 | 0.00 | 0.00 | 0.46 | 0.17 | 14 | Endothelial |
| Pea15a   | 0.47 | 0.00 | 0.00 | 0.39 | 0.14 | 14 | Endothelial |
| Anp32b   | 0.61 | 0.00 | 0.00 | 0.79 | 0.49 | 14 | Endothelial |
| Nes      | 0.43 | 0.00 | 0.00 | 0.52 | 0.21 | 14 | Endothelial |
| Srsf3    | 0.60 | 0.00 | 0.00 | 0.75 | 0.44 | 14 | Endothelial |
| Arl6ip1  | 0.93 | 0.00 | 0.00 | 0.78 | 0.52 | 14 | Endothelial |
| Foxp1    | 0.53 | 0.00 | 0.00 | 0.76 | 0.44 | 14 | Endothelial |
| Ephb4    | 0.41 | 0.00 | 0.00 | 0.27 | 0.08 | 14 | Endothelial |
| Slc9a3r2 | 0.47 | 0.00 | 0.00 | 0.50 | 0.20 | 14 | Endothelial |
| Gm10068  | 0.61 | 0.00 | 0.00 | 0.60 | 0.29 | 14 | Endothelial |
| Ppp1r16b | 0.40 | 0.00 | 0.00 | 0.30 | 0.09 | 14 | Endothelial |
| Dut      | 0.49 | 0.00 | 0.00 | 0.28 | 0.08 | 14 | Endothelial |
| Cbx3     | 0.59 | 0.00 | 0.00 | 0.64 | 0.33 | 14 | Endothelial |
| Tjp1     | 0.45 | 0.00 | 0.00 | 0.42 | 0.16 | 14 | Endothelial |
| Suz12    | 0.52 | 0.00 | 0.00 | 0.36 | 0.13 | 14 | Endothelial |
| Adam15   | 0.42 | 0.00 | 0.00 | 0.27 | 0.08 | 14 | Endothelial |
| Csrp2    | 0.46 | 0.00 | 0.00 | 0.43 | 0.16 | 14 | Endothelial |
| Slbp     | 0.63 | 0.00 | 0.00 | 0.38 | 0.14 | 14 | Endothelial |
| Slk      | 0.56 | 0.00 | 0.00 | 0.74 | 0.42 | 14 | Endothelial |
| Grap     | 0.40 | 0.00 | 0.00 | 0.37 | 0.13 | 14 | Endothelial |

|               |      |      |      |      |      |    |             |
|---------------|------|------|------|------|------|----|-------------|
| 9430020K01Rik | 0.44 | 0.00 | 0.00 | 0.36 | 0.12 | 14 | Endothelial |
| Nin           | 0.60 | 0.00 | 0.00 | 0.37 | 0.14 | 14 | Endothelial |
| 1810011O10Rik | 0.35 | 0.00 | 0.00 | 0.27 | 0.08 | 14 | Endothelial |
| 4931406P16Rik | 0.47 | 0.00 | 0.00 | 0.45 | 0.17 | 14 | Endothelial |
| Sptbn1        | 0.55 | 0.00 | 0.00 | 0.82 | 0.54 | 14 | Endothelial |
| Cntln         | 0.58 | 0.00 | 0.00 | 0.33 | 0.11 | 14 | Endothelial |
| Hes1          | 0.56 | 0.00 | 0.00 | 0.59 | 0.28 | 14 | Endothelial |
| Orc6          | 0.54 | 0.00 | 0.00 | 0.30 | 0.10 | 14 | Endothelial |
| Tubb4b-ps1    | 0.45 | 0.00 | 0.00 | 0.27 | 0.08 | 14 | Endothelial |
| Snx3          | 0.57 | 0.00 | 0.00 | 0.62 | 0.32 | 14 | Endothelial |
| Efnb2         | 0.50 | 0.00 | 0.00 | 0.39 | 0.14 | 14 | Endothelial |
| Maoa          | 0.43 | 0.00 | 0.00 | 0.26 | 0.08 | 14 | Endothelial |
| Acer2         | 0.38 | 0.00 | 0.00 | 0.30 | 0.10 | 14 | Endothelial |
| H2-D1         | 0.46 | 0.00 | 0.00 | 0.82 | 0.49 | 14 | Endothelial |
| Scn3b         | 0.35 | 0.00 | 0.00 | 0.25 | 0.07 | 14 | Endothelial |
| Pitpnc1       | 0.38 | 0.00 | 0.00 | 0.35 | 0.12 | 14 | Endothelial |
| Snrpd1        | 0.53 | 0.00 | 0.00 | 0.47 | 0.20 | 14 | Endothelial |
| Cpd           | 0.52 | 0.00 | 0.00 | 0.38 | 0.14 | 14 | Endothelial |
| Vim           | 0.46 | 0.00 | 0.00 | 0.91 | 0.65 | 14 | Endothelial |
| Prkd2         | 0.43 | 0.00 | 0.00 | 0.29 | 0.09 | 14 | Endothelial |
| Prkce         | 0.41 | 0.00 | 0.00 | 0.25 | 0.07 | 14 | Endothelial |
| Uaca          | 0.45 | 0.00 | 0.00 | 0.37 | 0.13 | 14 | Endothelial |
| Banf1         | 0.57 | 0.00 | 0.00 | 0.57 | 0.28 | 14 | Endothelial |
| Yes1          | 0.45 | 0.00 | 0.00 | 0.29 | 0.10 | 14 | Endothelial |
| Gimap6        | 0.35 | 0.00 | 0.00 | 0.42 | 0.16 | 14 | Endothelial |
| Sae1          | 0.47 | 0.00 | 0.00 | 0.31 | 0.10 | 14 | Endothelial |
| B2m           | 0.40 | 0.00 | 0.00 | 0.91 | 0.67 | 14 | Endothelial |
| Klf7          | 0.47 | 0.00 | 0.00 | 0.44 | 0.18 | 14 | Endothelial |
| Heg1          | 0.44 | 0.00 | 0.00 | 0.41 | 0.16 | 14 | Endothelial |
| Brd8          | 0.56 | 0.00 | 0.00 | 0.44 | 0.19 | 14 | Endothelial |
| Myl12b        | 0.52 | 0.00 | 0.00 | 0.82 | 0.60 | 14 | Endothelial |
| Gcc2          | 0.54 | 0.00 | 0.00 | 0.52 | 0.24 | 14 | Endothelial |
| Rhoj          | 0.40 | 0.00 | 0.00 | 0.45 | 0.18 | 14 | Endothelial |
| Cyth3         | 0.48 | 0.00 | 0.00 | 0.52 | 0.24 | 14 | Endothelial |
| MLlt4         | 0.51 | 0.00 | 0.00 | 0.47 | 0.20 | 14 | Endothelial |
| Gnai2         | 0.51 | 0.00 | 0.00 | 0.68 | 0.38 | 14 | Endothelial |
| Lrrc8c        | 0.40 | 0.00 | 0.00 | 0.25 | 0.08 | 14 | Endothelial |
| Dtymk         | 0.50 | 0.00 | 0.00 | 0.35 | 0.13 | 14 | Endothelial |
| Smc1a         | 0.54 | 0.00 | 0.00 | 0.64 | 0.35 | 14 | Endothelial |
| Prdx4         | 0.49 | 0.00 | 0.00 | 0.40 | 0.16 | 14 | Endothelial |
| Carhsp1       | 0.40 | 0.00 | 0.00 | 0.36 | 0.13 | 14 | Endothelial |
| Rnf168        | 0.52 | 0.00 | 0.00 | 0.35 | 0.13 | 14 | Endothelial |
| Zfp503        | 0.45 | 0.00 | 0.00 | 0.38 | 0.15 | 14 | Endothelial |

|          |      |      |      |      |      |    |             |
|----------|------|------|------|------|------|----|-------------|
| Fnbp1l   | 0.49 | 0.00 | 0.00 | 0.53 | 0.25 | 14 | Endothelial |
| Arhgef12 | 0.47 | 0.00 | 0.00 | 0.51 | 0.23 | 14 | Endothelial |
| Cbx5     | 0.60 | 0.00 | 0.00 | 0.53 | 0.25 | 14 | Endothelial |
| Actn4    | 0.48 | 0.00 | 0.00 | 0.58 | 0.28 | 14 | Endothelial |
| Dnajc8   | 0.53 | 0.00 | 0.00 | 0.70 | 0.42 | 14 | Endothelial |
| Zeb1     | 0.40 | 0.00 | 0.00 | 0.31 | 0.11 | 14 | Endothelial |
| Fam111a  | 0.46 | 0.00 | 0.00 | 0.38 | 0.15 | 14 | Endothelial |
| Ranbp1   | 0.54 | 0.00 | 0.00 | 0.57 | 0.28 | 14 | Endothelial |
| Cxx1a    | 0.39 | 0.00 | 0.00 | 0.49 | 0.21 | 14 | Endothelial |
| Ubald2   | 0.47 | 0.00 | 0.00 | 0.36 | 0.14 | 14 | Endothelial |
| Fmo1     | 0.38 | 0.00 | 0.00 | 0.32 | 0.11 | 14 | Endothelial |
| Ywhah    | 0.55 | 0.00 | 0.00 | 0.52 | 0.26 | 14 | Endothelial |
| Dlc1     | 0.44 | 0.00 | 0.00 | 0.41 | 0.17 | 14 | Endothelial |
| Meis2    | 0.39 | 0.00 | 0.00 | 0.32 | 0.11 | 14 | Endothelial |
| Stim2    | 0.40 | 0.00 | 0.00 | 0.27 | 0.09 | 14 | Endothelial |
| Hip1     | 0.43 | 0.00 | 0.00 | 0.38 | 0.15 | 14 | Endothelial |
| St3gal6  | 0.36 | 0.00 | 0.00 | 0.27 | 0.09 | 14 | Endothelial |
| Taok2    | 0.39 | 0.00 | 0.00 | 0.29 | 0.10 | 14 | Endothelial |
| Gimap5   | 0.34 | 0.00 | 0.00 | 0.31 | 0.11 | 14 | Endothelial |
| Gm6625   | 0.55 | 0.00 | 0.00 | 0.51 | 0.25 | 14 | Endothelial |
| Notch1   | 0.40 | 0.00 | 0.00 | 0.34 | 0.13 | 14 | Endothelial |
| Luzp1    | 0.47 | 0.00 | 0.00 | 0.44 | 0.19 | 14 | Endothelial |
| Xiap     | 0.45 | 0.00 | 0.00 | 0.45 | 0.20 | 14 | Endothelial |
| Xpo1     | 0.39 | 0.00 | 0.00 | 0.27 | 0.09 | 14 | Endothelial |
| Marcks   | 0.35 | 0.00 | 0.00 | 0.81 | 0.49 | 14 | Endothelial |
| Elovl5   | 0.49 | 0.00 | 0.00 | 0.37 | 0.15 | 14 | Endothelial |
| Cep57    | 0.41 | 0.00 | 0.00 | 0.29 | 0.11 | 14 | Endothelial |
| Cbx1     | 0.52 | 0.00 | 0.00 | 0.69 | 0.41 | 14 | Endothelial |
| Nfyb     | 0.43 | 0.00 | 0.00 | 0.31 | 0.11 | 14 | Endothelial |
| Ddx39    | 0.40 | 0.00 | 0.00 | 0.26 | 0.09 | 14 | Endothelial |
| Bub3     | 0.45 | 0.00 | 0.00 | 0.35 | 0.14 | 14 | Endothelial |
| Ptgfrn   | 0.40 | 0.00 | 0.00 | 0.27 | 0.09 | 14 | Endothelial |
| Cnn3     | 0.39 | 0.00 | 0.00 | 0.59 | 0.29 | 14 | Endothelial |
| Tpm3-rs7 | 0.40 | 0.00 | 0.00 | 0.88 | 0.69 | 14 | Endothelial |
| Pltp     | 0.45 | 0.00 | 0.00 | 0.41 | 0.18 | 14 | Endothelial |
| Arhgap31 | 0.42 | 0.00 | 0.00 | 0.31 | 0.12 | 14 | Endothelial |
| Sema6a   | 0.34 | 0.00 | 0.00 | 0.31 | 0.11 | 14 | Endothelial |
| Hoxa5    | 0.35 | 0.00 | 0.00 | 0.33 | 0.12 | 14 | Endothelial |
| Hdac7    | 0.38 | 0.00 | 0.00 | 0.34 | 0.13 | 14 | Endothelial |
| Ssrp1    | 0.46 | 0.00 | 0.00 | 0.45 | 0.21 | 14 | Endothelial |
| Ly6c1    | 0.27 | 0.00 | 0.00 | 0.43 | 0.18 | 14 | Endothelial |
| Aplp2    | 0.48 | 0.00 | 0.00 | 0.66 | 0.38 | 14 | Endothelial |
| Sypl     | 0.46 | 0.00 | 0.00 | 0.52 | 0.25 | 14 | Endothelial |

|         |      |      |      |      |      |    |             |
|---------|------|------|------|------|------|----|-------------|
| Nop56   | 0.49 | 0.00 | 0.00 | 0.43 | 0.19 | 14 | Endothelial |
| Wasf2   | 0.45 | 0.00 | 0.00 | 0.57 | 0.30 | 14 | Endothelial |
| Cd97    | 0.36 | 0.00 | 0.00 | 0.41 | 0.18 | 14 | Endothelial |
| Ctnnd1  | 0.43 | 0.00 | 0.00 | 0.37 | 0.16 | 14 | Endothelial |
| Actl6a  | 0.37 | 0.00 | 0.00 | 0.29 | 0.10 | 14 | Endothelial |
| Snrk    | 0.36 | 0.00 | 0.00 | 0.37 | 0.15 | 14 | Endothelial |
| Tcf4    | 0.40 | 0.00 | 0.00 | 0.70 | 0.40 | 14 | Endothelial |
| Nrp1    | 0.42 | 0.00 | 0.00 | 0.66 | 0.39 | 14 | Endothelial |
| Itgb1   | 0.38 | 0.00 | 0.00 | 0.85 | 0.62 | 14 | Endothelial |
| Ybx1    | 0.40 | 0.00 | 0.00 | 0.84 | 0.64 | 14 | Endothelial |
| Cxx1b   | 0.32 | 0.00 | 0.00 | 0.47 | 0.22 | 14 | Endothelial |
| Cxx1c   | 0.33 | 0.00 | 0.00 | 0.46 | 0.21 | 14 | Endothelial |
| Ptrf    | 0.45 | 0.00 | 0.00 | 0.62 | 0.35 | 14 | Endothelial |
| Mapk3   | 0.37 | 0.00 | 0.00 | 0.33 | 0.13 | 14 | Endothelial |
| Frmd4a  | 0.35 | 0.00 | 0.00 | 0.26 | 0.09 | 14 | Endothelial |
| Amotl1  | 0.37 | 0.00 | 0.00 | 0.37 | 0.15 | 14 | Endothelial |
| Ctnna1  | 0.41 | 0.00 | 0.00 | 0.63 | 0.36 | 14 | Endothelial |
| Hnrnpu  | 0.42 | 0.00 | 0.00 | 0.83 | 0.63 | 14 | Endothelial |
| Baz1b   | 0.48 | 0.00 | 0.00 | 0.51 | 0.26 | 14 | Endothelial |
| Srrt    | 0.44 | 0.00 | 0.00 | 0.42 | 0.19 | 14 | Endothelial |
| Clic1   | 0.43 | 0.00 | 0.00 | 0.63 | 0.37 | 14 | Endothelial |
| Rel1    | 0.44 | 0.00 | 0.00 | 0.43 | 0.20 | 14 | Endothelial |
| Cd9     | 0.28 | 0.00 | 0.00 | 0.64 | 0.34 | 14 | Endothelial |
| Sptan1  | 0.44 | 0.00 | 0.00 | 0.37 | 0.16 | 14 | Endothelial |
| Itga1   | 0.34 | 0.00 | 0.00 | 0.26 | 0.09 | 14 | Endothelial |
| Kpnb1   | 0.43 | 0.00 | 0.00 | 0.40 | 0.18 | 14 | Endothelial |
| Guk1    | 0.42 | 0.00 | 0.00 | 0.35 | 0.15 | 14 | Endothelial |
| Hnrnpab | 0.50 | 0.00 | 0.00 | 0.57 | 0.32 | 14 | Endothelial |
| Smad7   | 0.33 | 0.00 | 0.00 | 0.29 | 0.11 | 14 | Endothelial |
| Ilf2    | 0.41 | 0.00 | 0.00 | 0.41 | 0.19 | 14 | Endothelial |
| Smc6    | 0.49 | 0.00 | 0.00 | 0.57 | 0.32 | 14 | Endothelial |
| Tpm3    | 0.37 | 0.00 | 0.00 | 0.88 | 0.69 | 14 | Endothelial |
| Kank3   | 0.34 | 0.00 | 0.00 | 0.34 | 0.14 | 14 | Endothelial |
| Scoc    | 0.36 | 0.00 | 0.00 | 0.31 | 0.12 | 14 | Endothelial |
| Hnrnpa3 | 0.45 | 0.00 | 0.00 | 0.70 | 0.46 | 14 | Endothelial |
| Gm6793  | 0.45 | 0.00 | 0.00 | 0.53 | 0.29 | 14 | Endothelial |
| Cdk4    | 0.42 | 0.00 | 0.00 | 0.47 | 0.23 | 14 | Endothelial |
| Gkap1   | 0.38 | 0.00 | 0.00 | 0.30 | 0.12 | 14 | Endothelial |
| Add3    | 0.42 | 0.00 | 0.00 | 0.52 | 0.27 | 14 | Endothelial |
| Zfp608  | 0.36 | 0.00 | 0.00 | 0.33 | 0.14 | 14 | Endothelial |
| Tpst2   | 0.29 | 0.00 | 0.00 | 0.30 | 0.12 | 14 | Endothelial |
| Trib2   | 0.28 | 0.00 | 0.00 | 0.28 | 0.11 | 14 | Endothelial |
| Prex2   | 0.36 | 0.00 | 0.00 | 0.40 | 0.18 | 14 | Endothelial |

|         |      |      |      |      |      |    |             |
|---------|------|------|------|------|------|----|-------------|
| Hnrnpf  | 0.39 | 0.00 | 0.00 | 0.60 | 0.34 | 14 | Endothelial |
| Bnip2   | 0.42 | 0.00 | 0.00 | 0.55 | 0.29 | 14 | Endothelial |
| Fubp1   | 0.40 | 0.00 | 0.00 | 0.48 | 0.24 | 14 | Endothelial |
| Myo10   | 0.39 | 0.00 | 0.00 | 0.30 | 0.13 | 14 | Endothelial |
| Cd151   | 0.33 | 0.00 | 0.00 | 0.36 | 0.16 | 14 | Endothelial |
| Ablim1  | 0.42 | 0.00 | 0.00 | 0.48 | 0.24 | 14 | Endothelial |
| Snhg5   | 0.41 | 0.00 | 0.00 | 0.38 | 0.17 | 14 | Endothelial |
| Srsf2   | 0.48 | 0.00 | 0.00 | 0.63 | 0.38 | 14 | Endothelial |
| Dusp6   | 0.39 | 0.00 | 0.00 | 0.38 | 0.18 | 14 | Endothelial |
| Syne2   | 0.44 | 0.00 | 0.00 | 0.32 | 0.14 | 14 | Endothelial |
| Gbp7    | 0.35 | 0.00 | 0.00 | 0.33 | 0.14 | 14 | Endothelial |
| Ctcf    | 0.44 | 0.00 | 0.00 | 0.45 | 0.23 | 14 | Endothelial |
| Jun     | 0.27 | 0.00 | 0.00 | 0.64 | 0.36 | 14 | Endothelial |
| Rap1a   | 0.38 | 0.00 | 0.00 | 0.55 | 0.30 | 14 | Endothelial |
| Plekha2 | 0.30 | 0.00 | 0.00 | 0.25 | 0.09 | 14 | Endothelial |
| Myo18a  | 0.36 | 0.00 | 0.00 | 0.26 | 0.10 | 14 | Endothelial |
| Vps36   | 0.44 | 0.00 | 0.00 | 0.52 | 0.28 | 14 | Endothelial |
| Calm3   | 0.39 | 0.00 | 0.00 | 0.40 | 0.19 | 14 | Endothelial |
| Nfic    | 0.37 | 0.00 | 0.00 | 0.47 | 0.24 | 14 | Endothelial |
| Gclm    | 0.48 | 0.00 | 0.00 | 0.64 | 0.41 | 14 | Endothelial |
| Pds5b   | 0.39 | 0.00 | 0.00 | 0.29 | 0.12 | 14 | Endothelial |
| H2-K1   | 0.44 | 0.00 | 0.00 | 0.56 | 0.32 | 14 | Endothelial |
| Rhoc    | 0.32 | 0.00 | 0.00 | 0.42 | 0.20 | 14 | Endothelial |
| Ubb     | 0.32 | 0.00 | 0.00 | 0.91 | 0.80 | 14 | Endothelial |
| Ccser2  | 0.38 | 0.00 | 0.00 | 0.33 | 0.14 | 14 | Endothelial |
| Gm5641  | 0.44 | 0.00 | 0.00 | 0.59 | 0.36 | 14 | Endothelial |
| Lyn     | 0.27 | 0.00 | 0.00 | 0.31 | 0.13 | 14 | Endothelial |
| Rif1    | 0.38 | 0.00 | 0.00 | 0.35 | 0.16 | 14 | Endothelial |
| Smarca2 | 0.43 | 0.00 | 0.00 | 0.58 | 0.34 | 14 | Endothelial |
| Map7d1  | 0.35 | 0.00 | 0.00 | 0.38 | 0.18 | 14 | Endothelial |
| Dusp3   | 0.33 | 0.00 | 0.00 | 0.40 | 0.19 | 14 | Endothelial |
| Hspa14  | 0.32 | 0.00 | 0.00 | 0.26 | 0.10 | 14 | Endothelial |
| Ehd2    | 0.29 | 0.00 | 0.00 | 0.33 | 0.14 | 14 | Endothelial |
| Cd200   | 0.26 | 0.00 | 0.00 | 0.51 | 0.27 | 14 | Endothelial |
| Supt16  | 0.38 | 0.00 | 0.00 | 0.47 | 0.24 | 14 | Endothelial |
| Ccdc88a | 0.35 | 0.00 | 0.00 | 0.47 | 0.24 | 14 | Endothelial |
| Lgals9  | 0.29 | 0.00 | 0.00 | 0.32 | 0.14 | 14 | Endothelial |
| Gm12728 | 0.37 | 0.00 | 0.00 | 0.36 | 0.17 | 14 | Endothelial |
| Nmi     | 0.28 | 0.00 | 0.00 | 0.27 | 0.11 | 14 | Endothelial |
| Mxra7   | 0.31 | 0.00 | 0.00 | 0.31 | 0.13 | 14 | Endothelial |
| Aph1a   | 0.31 | 0.00 | 0.00 | 0.28 | 0.12 | 14 | Endothelial |
| Nsmce1  | 0.35 | 0.00 | 0.00 | 0.30 | 0.13 | 14 | Endothelial |
| Rbm3    | 0.42 | 0.00 | 0.00 | 0.63 | 0.40 | 14 | Endothelial |

|           |      |      |      |      |      |    |             |
|-----------|------|------|------|------|------|----|-------------|
| Dynl1     | 0.42 | 0.00 | 0.00 | 0.69 | 0.44 | 14 | Endothelial |
| Arl2bp    | 0.34 | 0.00 | 0.00 | 0.30 | 0.13 | 14 | Endothelial |
| Elf2      | 0.37 | 0.00 | 0.00 | 0.37 | 0.17 | 14 | Endothelial |
| Ehd1      | 0.29 | 0.00 | 0.00 | 0.27 | 0.11 | 14 | Endothelial |
| Srsf4     | 0.38 | 0.00 | 0.00 | 0.29 | 0.13 | 14 | Endothelial |
| Vdac3     | 0.33 | 0.00 | 0.00 | 0.36 | 0.17 | 14 | Endothelial |
| Srsf7     | 0.36 | 0.00 | 0.00 | 0.33 | 0.15 | 14 | Endothelial |
| Xist      | 0.46 | 0.00 | 0.00 | 0.74 | 0.50 | 14 | Endothelial |
| Rpa3      | 0.34 | 0.00 | 0.00 | 0.29 | 0.12 | 14 | Endothelial |
| Klf2      | 0.34 | 0.00 | 0.00 | 0.40 | 0.19 | 14 | Endothelial |
| Mrpl51    | 0.34 | 0.00 | 0.00 | 0.33 | 0.15 | 14 | Endothelial |
| Naa38     | 0.31 | 0.00 | 0.00 | 0.32 | 0.15 | 14 | Endothelial |
| Gm5160    | 0.42 | 0.00 | 0.00 | 0.41 | 0.21 | 14 | Endothelial |
| Acat1     | 0.38 | 0.00 | 0.00 | 0.37 | 0.18 | 14 | Endothelial |
| Ilf3      | 0.33 | 0.00 | 0.00 | 0.28 | 0.12 | 14 | Endothelial |
| Sept11    | 0.33 | 0.00 | 0.00 | 0.44 | 0.22 | 14 | Endothelial |
| Ndufa8    | 0.36 | 0.00 | 0.00 | 0.46 | 0.25 | 14 | Endothelial |
| Fermt2    | 0.28 | 0.00 | 0.00 | 0.64 | 0.39 | 14 | Endothelial |
| Tmco1     | 0.36 | 0.00 | 0.00 | 0.52 | 0.29 | 14 | Endothelial |
| Cnot6     | 0.38 | 0.00 | 0.00 | 0.33 | 0.16 | 14 | Endothelial |
| Mapre1    | 0.37 | 0.00 | 0.00 | 0.51 | 0.29 | 14 | Endothelial |
| Larp7     | 0.35 | 0.00 | 0.00 | 0.35 | 0.17 | 14 | Endothelial |
| Smc3      | 0.41 | 0.00 | 0.00 | 0.60 | 0.37 | 14 | Endothelial |
| Itpril2   | 0.32 | 0.00 | 0.00 | 0.35 | 0.17 | 14 | Endothelial |
| Nop58     | 0.38 | 0.00 | 0.00 | 0.47 | 0.26 | 14 | Endothelial |
| Rbbp4     | 0.36 | 0.00 | 0.00 | 0.39 | 0.20 | 14 | Endothelial |
| Galnt18   | 0.27 | 0.00 | 0.00 | 0.26 | 0.11 | 14 | Endothelial |
| Snrbp     | 0.39 | 0.00 | 0.00 | 0.57 | 0.35 | 14 | Endothelial |
| Sh3glb1   | 0.36 | 0.00 | 0.00 | 0.63 | 0.39 | 14 | Endothelial |
| Nckap5    | 0.38 | 0.00 | 0.00 | 0.28 | 0.13 | 14 | Endothelial |
| Tjp2      | 0.30 | 0.00 | 0.00 | 0.34 | 0.16 | 14 | Endothelial |
| Acap2     | 0.28 | 0.00 | 0.00 | 0.39 | 0.19 | 14 | Endothelial |
| Vbp1      | 0.30 | 0.00 | 0.00 | 0.32 | 0.15 | 14 | Endothelial |
| Dot1l     | 0.32 | 0.00 | 0.00 | 0.29 | 0.13 | 14 | Endothelial |
| G3bp1     | 0.30 | 0.00 | 0.00 | 0.35 | 0.17 | 14 | Endothelial |
| Zcrb1     | 0.38 | 0.00 | 0.00 | 0.50 | 0.28 | 14 | Endothelial |
| Mtf2      | 0.39 | 0.00 | 0.00 | 0.35 | 0.17 | 14 | Endothelial |
| Vdac3-ps1 | 0.27 | 0.00 | 0.00 | 0.32 | 0.15 | 14 | Endothelial |
| Rfc1      | 0.41 | 0.00 | 0.00 | 0.39 | 0.20 | 14 | Endothelial |
| Clic4     | 0.30 | 0.00 | 0.00 | 0.51 | 0.29 | 14 | Endothelial |
| Syncrin   | 0.36 | 0.00 | 0.00 | 0.45 | 0.24 | 14 | Endothelial |
| Fam101b   | 0.38 | 0.00 | 0.00 | 0.36 | 0.18 | 14 | Endothelial |
| Ccdc25    | 0.35 | 0.00 | 0.00 | 0.30 | 0.14 | 14 | Endothelial |

|               |      |      |      |      |      |    |             |
|---------------|------|------|------|------|------|----|-------------|
| Lsm5          | 0.29 | 0.00 | 0.00 | 0.27 | 0.12 | 14 | Endothelial |
| Dnaja1        | 0.37 | 0.00 | 0.00 | 0.72 | 0.51 | 14 | Endothelial |
| Gm10093       | 0.36 | 0.00 | 0.00 | 0.37 | 0.19 | 14 | Endothelial |
| Hmgn5         | 0.34 | 0.00 | 0.00 | 0.47 | 0.26 | 14 | Endothelial |
| Ssna1         | 0.29 | 0.00 | 0.00 | 0.29 | 0.13 | 14 | Endothelial |
| Rnps1         | 0.29 | 0.00 | 0.00 | 0.31 | 0.15 | 14 | Endothelial |
| Sept7         | 0.30 | 0.00 | 0.00 | 0.78 | 0.58 | 14 | Endothelial |
| 2700029M09Rik | 0.30 | 0.00 | 0.00 | 0.28 | 0.12 | 14 | Endothelial |
| Rassf1        | 0.30 | 0.00 | 0.00 | 0.30 | 0.14 | 14 | Endothelial |
| Uchl5         | 0.26 | 0.00 | 0.00 | 0.26 | 0.11 | 14 | Endothelial |
| Ssb           | 0.35 | 0.00 | 0.00 | 0.75 | 0.54 | 14 | Endothelial |
| Dynlt1f       | 0.30 | 0.00 | 0.00 | 0.44 | 0.24 | 14 | Endothelial |
| Skil          | 0.32 | 0.00 | 0.00 | 0.30 | 0.14 | 14 | Endothelial |
| Rnf7          | 0.29 | 0.00 | 0.00 | 0.44 | 0.24 | 14 | Endothelial |
| Map4k4        | 0.34 | 0.00 | 0.00 | 0.36 | 0.18 | 14 | Endothelial |
| Hdgf          | 0.40 | 0.00 | 0.00 | 0.44 | 0.24 | 14 | Endothelial |
| Gm8991        | 0.37 | 0.00 | 0.00 | 0.41 | 0.22 | 14 | Endothelial |
| Anapc5        | 0.29 | 0.00 | 0.00 | 0.36 | 0.18 | 14 | Endothelial |
| Nap1l4        | 0.33 | 0.00 | 0.00 | 0.46 | 0.26 | 14 | Endothelial |
| Nudt21        | 0.28 | 0.00 | 0.00 | 0.27 | 0.12 | 14 | Endothelial |
| Serbp1        | 0.28 | 0.00 | 0.00 | 0.87 | 0.74 | 14 | Endothelial |
| Hnrnpd        | 0.35 | 0.00 | 0.00 | 0.48 | 0.28 | 14 | Endothelial |
| Pa2g4         | 0.33 | 0.00 | 0.00 | 0.46 | 0.26 | 14 | Endothelial |
| Brd9          | 0.30 | 0.00 | 0.00 | 0.38 | 0.19 | 14 | Endothelial |
| Marcksl1      | 0.26 | 0.00 | 0.00 | 0.38 | 0.19 | 14 | Endothelial |
| Smchd1        | 0.31 | 0.00 | 0.00 | 0.32 | 0.16 | 14 | Endothelial |
| Mgll          | 0.27 | 0.00 | 0.00 | 0.33 | 0.16 | 14 | Endothelial |
| Leprot        | 0.29 | 0.00 | 0.00 | 0.55 | 0.32 | 14 | Endothelial |
| Gm9242        | 0.33 | 0.00 | 0.00 | 0.42 | 0.23 | 14 | Endothelial |
| 1700020l14Rik | 0.31 | 0.00 | 0.00 | 0.41 | 0.22 | 14 | Endothelial |
| Cyb5r3        | 0.34 | 0.00 | 0.00 | 0.60 | 0.38 | 14 | Endothelial |
| Rhoa          | 0.33 | 0.00 | 0.00 | 0.66 | 0.46 | 14 | Endothelial |
| Tmem109       | 0.28 | 0.00 | 0.00 | 0.27 | 0.12 | 14 | Endothelial |
| Stag1         | 0.34 | 0.00 | 0.00 | 0.26 | 0.12 | 14 | Endothelial |
| Stk4          | 0.25 | 0.00 | 0.00 | 0.29 | 0.14 | 14 | Endothelial |
| Ywhae         | 0.35 | 0.00 | 0.00 | 0.73 | 0.54 | 14 | Endothelial |
| Ctnnb1        | 0.33 | 0.00 | 0.00 | 0.56 | 0.34 | 14 | Endothelial |
| Fmr1          | 0.30 | 0.00 | 0.00 | 0.29 | 0.14 | 14 | Endothelial |
| Lyar          | 0.26 | 0.00 | 0.00 | 0.31 | 0.15 | 14 | Endothelial |
| Hnrnpr        | 0.31 | 0.00 | 0.00 | 0.44 | 0.24 | 14 | Endothelial |
| Cox7a2        | 0.34 | 0.00 | 0.00 | 0.68 | 0.48 | 14 | Endothelial |
| H3f3b         | 0.30 | 0.00 | 0.00 | 0.95 | 0.89 | 14 | Endothelial |
| Ywhaq         | 0.30 | 0.00 | 0.00 | 0.58 | 0.36 | 14 | Endothelial |

|               |      |      |      |      |      |    |             |
|---------------|------|------|------|------|------|----|-------------|
| Taf7          | 0.26 | 0.00 | 0.00 | 0.25 | 0.11 | 14 | Endothelial |
| Ywhab         | 0.30 | 0.00 | 0.00 | 0.77 | 0.56 | 14 | Endothelial |
| Tardbp        | 0.31 | 0.00 | 0.00 | 0.51 | 0.30 | 14 | Endothelial |
| Tead2         | 0.26 | 0.00 | 0.00 | 0.27 | 0.12 | 14 | Endothelial |
| Hdac1         | 0.34 | 0.00 | 0.00 | 0.36 | 0.19 | 14 | Endothelial |
| Eif4a3        | 0.28 | 0.00 | 0.00 | 0.36 | 0.19 | 14 | Endothelial |
| Dynlt1b       | 0.27 | 0.00 | 0.00 | 0.44 | 0.25 | 14 | Endothelial |
| Srsf1         | 0.28 | 0.00 | 0.00 | 0.28 | 0.14 | 14 | Endothelial |
| Rab11a        | 0.27 | 0.00 | 0.00 | 0.45 | 0.26 | 14 | Endothelial |
| Dynlt1c       | 0.28 | 0.00 | 0.00 | 0.46 | 0.26 | 14 | Endothelial |
| Taf9          | 0.30 | 0.00 | 0.00 | 0.34 | 0.18 | 14 | Endothelial |
| Eif4g2        | 0.34 | 0.00 | 0.00 | 0.61 | 0.40 | 14 | Endothelial |
| Ccdc174       | 0.29 | 0.00 | 0.00 | 0.31 | 0.15 | 14 | Endothelial |
| Dram2         | 0.28 | 0.00 | 0.00 | 0.32 | 0.16 | 14 | Endothelial |
| B230219D22Rik | 0.32 | 0.00 | 0.00 | 0.47 | 0.27 | 14 | Endothelial |
| Sash1         | 0.25 | 0.00 | 0.00 | 0.27 | 0.13 | 14 | Endothelial |
| Pcmt1         | 0.25 | 0.00 | 0.00 | 0.36 | 0.19 | 14 | Endothelial |
| Dynlt1a       | 0.27 | 0.00 | 0.00 | 0.40 | 0.22 | 14 | Endothelial |
| Gnb1          | 0.29 | 0.00 | 0.00 | 0.39 | 0.21 | 14 | Endothelial |
| Nono          | 0.25 | 0.00 | 0.00 | 0.38 | 0.20 | 14 | Endothelial |
| Qk            | 0.28 | 0.00 | 0.00 | 0.49 | 0.29 | 14 | Endothelial |
| U2af1         | 0.28 | 0.00 | 0.00 | 0.33 | 0.18 | 14 | Endothelial |
| Hist1h2bc     | 0.52 | 0.00 | 0.00 | 0.27 | 0.13 | 14 | Endothelial |
| Atpif1        | 0.28 | 0.00 | 0.00 | 0.73 | 0.52 | 14 | Endothelial |
| Sumo2         | 0.31 | 0.00 | 0.00 | 0.50 | 0.30 | 14 | Endothelial |
| Gm9825        | 0.26 | 0.00 | 0.00 | 0.26 | 0.13 | 14 | Endothelial |
| Kat6a         | 0.28 | 0.00 | 0.00 | 0.28 | 0.14 | 14 | Endothelial |
| Txn1          | 0.28 | 0.00 | 0.00 | 0.69 | 0.49 | 14 | Endothelial |
| Pdap1         | 0.32 | 0.00 | 0.00 | 0.65 | 0.45 | 14 | Endothelial |
| Mat2a         | 0.30 | 0.00 | 0.00 | 0.46 | 0.27 | 14 | Endothelial |
| Dhx15         | 0.32 | 0.00 | 0.00 | 0.44 | 0.26 | 14 | Endothelial |
| Myh9          | 0.28 | 0.00 | 0.00 | 0.53 | 0.33 | 14 | Endothelial |
| Tnfaip1       | 0.26 | 0.00 | 0.00 | 0.31 | 0.16 | 14 | Endothelial |
| Dnm1l         | 0.28 | 0.00 | 0.00 | 0.32 | 0.17 | 14 | Endothelial |
| Hint1         | 0.32 | 0.00 | 0.00 | 0.65 | 0.46 | 14 | Endothelial |
| Erh           | 0.26 | 0.00 | 0.00 | 0.47 | 0.28 | 14 | Endothelial |
| Snrpe         | 0.29 | 0.00 | 0.00 | 0.56 | 0.36 | 14 | Endothelial |
| Commd1        | 0.26 | 0.00 | 0.00 | 0.37 | 0.20 | 14 | Endothelial |
| Rock2         | 0.28 | 0.00 | 0.00 | 0.51 | 0.32 | 14 | Endothelial |
| Smarca4       | 0.27 | 0.00 | 0.00 | 0.32 | 0.17 | 14 | Endothelial |
| Hnrnpa0       | 0.25 | 0.00 | 0.00 | 0.38 | 0.21 | 14 | Endothelial |
| Fkbp3         | 0.28 | 0.00 | 0.00 | 0.49 | 0.30 | 14 | Endothelial |
| Hp1bp3        | 0.33 | 0.00 | 0.00 | 0.63 | 0.44 | 14 | Endothelial |

|               |      |      |      |      |      |    |                   |
|---------------|------|------|------|------|------|----|-------------------|
| Casp8ap2      | 0.34 | 0.00 | 0.00 | 0.32 | 0.17 | 14 | Endothelial       |
| Bzw1          | 0.27 | 0.00 | 0.00 | 0.52 | 0.32 | 14 | Endothelial       |
| Rbbp7         | 0.28 | 0.00 | 0.00 | 0.44 | 0.26 | 14 | Endothelial       |
| Ing1          | 0.27 | 0.00 | 0.00 | 0.29 | 0.15 | 14 | Endothelial       |
| Tra2b         | 0.30 | 0.00 | 0.00 | 0.48 | 0.29 | 14 | Endothelial       |
| Sfpq          | 0.30 | 0.00 | 0.00 | 0.55 | 0.36 | 14 | Endothelial       |
| Oxct1         | 0.25 | 0.00 | 0.00 | 0.28 | 0.15 | 14 | Endothelial       |
| Wsb1          | 0.28 | 0.00 | 0.00 | 0.36 | 0.21 | 14 | Endothelial       |
| B020018G12Rik | 0.25 | 0.00 | 0.00 | 0.42 | 0.25 | 14 | Endothelial       |
| Slc6a6        | 0.29 | 0.00 | 0.00 | 0.42 | 0.25 | 14 | Endothelial       |
| Hnrnpa1       | 0.26 | 0.00 | 0.00 | 0.43 | 0.26 | 14 | Endothelial       |
| Kras          | 0.27 | 0.00 | 0.00 | 0.33 | 0.18 | 14 | Endothelial       |
| Thrap3        | 0.28 | 0.00 | 0.00 | 0.56 | 0.37 | 14 | Endothelial       |
| Kif5b         | 0.25 | 0.00 | 0.00 | 0.67 | 0.47 | 14 | Endothelial       |
| Tsix          | 0.30 | 0.00 | 0.00 | 0.32 | 0.18 | 14 | Endothelial       |
| Zfp326        | 0.26 | 0.00 | 0.00 | 0.39 | 0.23 | 14 | Endothelial       |
| Hnrnpdl       | 0.26 | 0.00 | 0.00 | 0.56 | 0.36 | 14 | Endothelial       |
| Zc3h7a        | 0.26 | 0.00 | 0.00 | 0.45 | 0.28 | 14 | Endothelial       |
| Nudt4         | 0.26 | 0.00 | 0.00 | 0.30 | 0.17 | 14 | Endothelial       |
| Fus           | 0.26 | 0.00 | 0.00 | 0.66 | 0.48 | 14 | Endothelial       |
| Cep110        | 0.26 | 0.00 | 0.00 | 0.32 | 0.18 | 14 | Endothelial       |
| Tcf21         | 2.15 | 0.00 | 0.00 | 0.93 | 0.15 | 15 | Matrix Fibroblast |
| Inmt          | 2.06 | 0.00 | 0.00 | 0.56 | 0.04 | 15 | Matrix Fibroblast |
| Gsn           | 1.80 | 0.00 | 0.00 | 0.87 | 0.23 | 15 | Matrix Fibroblast |
| Ifitm1        | 1.77 | 0.00 | 0.00 | 0.83 | 0.12 | 15 | Matrix Fibroblast |
| Mfap4         | 1.70 | 0.00 | 0.00 | 0.96 | 0.23 | 15 | Matrix Fibroblast |
| Ppp1r14a      | 1.69 | 0.00 | 0.00 | 0.55 | 0.07 | 15 | Matrix Fibroblast |
| Fmo2          | 1.69 | 0.00 | 0.00 | 0.83 | 0.15 | 15 | Matrix Fibroblast |
| Gyg           | 1.65 | 0.00 | 0.00 | 0.78 | 0.18 | 15 | Matrix Fibroblast |
| Plac9a        | 1.62 | 0.00 | 0.00 | 0.90 | 0.29 | 15 | Matrix Fibroblast |
| Plac9b        | 1.61 | 0.00 | 0.00 | 0.89 | 0.29 | 15 | Matrix Fibroblast |
| Gpx3          | 1.59 | 0.00 | 0.00 | 0.70 | 0.12 | 15 | Matrix Fibroblast |
| Adh1          | 1.55 | 0.00 | 0.00 | 0.82 | 0.15 | 15 | Matrix Fibroblast |
| Clec3b        | 1.54 | 0.00 | 0.00 | 0.48 | 0.06 | 15 | Matrix Fibroblast |
| Col13a1       | 1.52 | 0.00 | 0.00 | 0.54 | 0.09 | 15 | Matrix Fibroblast |
| Nexn          | 1.52 | 0.00 | 0.00 | 0.70 | 0.21 | 15 | Matrix Fibroblast |
| Olfml3        | 1.49 | 0.00 | 0.00 | 0.48 | 0.08 | 15 | Matrix Fibroblast |
| Mgp           | 1.49 | 0.00 | 0.00 | 0.98 | 0.30 | 15 | Matrix Fibroblast |
| G0s2          | 1.46 | 0.00 | 0.00 | 0.57 | 0.12 | 15 | Matrix Fibroblast |
| Fhl1          | 1.45 | 0.00 | 0.00 | 0.86 | 0.28 | 15 | Matrix Fibroblast |
| Hba-a2        | 1.42 | 0.00 | 0.00 | 0.97 | 0.69 | 15 | Matrix Fibroblast |
| Lbh           | 1.41 | 0.00 | 0.00 | 0.68 | 0.18 | 15 | Matrix Fibroblast |
| Hba-a1        | 1.40 | 0.00 | 0.00 | 0.98 | 0.70 | 15 | Matrix Fibroblast |

|               |      |      |      |      |      |    |                   |
|---------------|------|------|------|------|------|----|-------------------|
| Maf           | 1.38 | 0.00 | 0.00 | 0.69 | 0.18 | 15 | Matrix Fibroblast |
| Hsd11b1       | 1.34 | 0.00 | 0.00 | 0.49 | 0.08 | 15 | Matrix Fibroblast |
| Limch1        | 1.32 | 0.00 | 0.00 | 0.90 | 0.29 | 15 | Matrix Fibroblast |
| Rbp1          | 1.26 | 0.00 | 0.00 | 0.65 | 0.18 | 15 | Matrix Fibroblast |
| Hbb-bt        | 1.21 | 0.00 | 0.00 | 0.98 | 0.71 | 15 | Matrix Fibroblast |
| Hbb-bs        | 1.21 | 0.00 | 0.00 | 0.99 | 0.80 | 15 | Matrix Fibroblast |
| Dpep1         | 1.17 | 0.00 | 0.00 | 0.37 | 0.06 | 15 | Matrix Fibroblast |
| Phlda1        | 1.48 | 0.00 | 0.00 | 0.63 | 0.19 | 15 | Matrix Fibroblast |
| Gm3940        | 1.32 | 0.00 | 0.00 | 0.78 | 0.35 | 15 | Matrix Fibroblast |
| Fn1           | 1.14 | 0.00 | 0.00 | 0.70 | 0.22 | 15 | Matrix Fibroblast |
| Serping1      | 1.24 | 0.00 | 0.00 | 0.48 | 0.11 | 15 | Matrix Fibroblast |
| Gm10923       | 1.37 | 0.00 | 0.00 | 0.61 | 0.21 | 15 | Matrix Fibroblast |
| 6030408B16Rik | 1.05 | 0.00 | 0.00 | 0.28 | 0.04 | 15 | Matrix Fibroblast |
| Apoe          | 0.72 | 0.00 | 0.00 | 0.74 | 0.27 | 15 | Matrix Fibroblast |
| Gm10132       | 0.93 | 0.00 | 0.00 | 0.94 | 0.72 | 15 | Matrix Fibroblast |
| Gm10335       | 0.94 | 0.00 | 0.00 | 0.95 | 0.73 | 15 | Matrix Fibroblast |
| Rpl23a        | 1.00 | 0.00 | 0.00 | 0.92 | 0.66 | 15 | Matrix Fibroblast |
| Rpl23a-ps3    | 0.91 | 0.00 | 0.00 | 0.94 | 0.74 | 15 | Matrix Fibroblast |
| mt-Td         | 1.27 | 0.00 | 0.00 | 0.52 | 0.16 | 15 | Matrix Fibroblast |
| Col1a1        | 0.85 | 0.00 | 0.00 | 0.71 | 0.25 | 15 | Matrix Fibroblast |
| Atp1a2        | 1.20 | 0.00 | 0.00 | 0.40 | 0.09 | 15 | Matrix Fibroblast |
| Rps4x         | 0.77 | 0.00 | 0.00 | 0.98 | 0.86 | 15 | Matrix Fibroblast |
| Cdh11         | 0.99 | 0.00 | 0.00 | 0.59 | 0.18 | 15 | Matrix Fibroblast |
| Pcolce2       | 1.14 | 0.00 | 0.00 | 0.38 | 0.09 | 15 | Matrix Fibroblast |
| Rpl10         | 0.90 | 0.00 | 0.00 | 0.93 | 0.71 | 15 | Matrix Fibroblast |
| Gm22758       | 0.88 | 0.00 | 0.00 | 0.93 | 0.68 | 15 | Matrix Fibroblast |
| RPL24         | 1.05 | 0.00 | 0.00 | 0.80 | 0.45 | 15 | Matrix Fibroblast |
| Gm7676        | 1.05 | 0.00 | 0.00 | 0.54 | 0.18 | 15 | Matrix Fibroblast |
| Rps27         | 0.74 | 0.00 | 0.00 | 0.97 | 0.81 | 15 | Matrix Fibroblast |
| Ogn           | 1.01 | 0.00 | 0.00 | 0.46 | 0.13 | 15 | Matrix Fibroblast |
| Col1a2        | 0.47 | 0.00 | 0.00 | 0.92 | 0.38 | 15 | Matrix Fibroblast |
| Gm22759       | 0.87 | 0.00 | 0.00 | 0.89 | 0.64 | 15 | Matrix Fibroblast |
| Selenbp1      | 0.97 | 0.00 | 0.00 | 0.59 | 0.22 | 15 | Matrix Fibroblast |
| Rpl21         | 0.76 | 0.00 | 0.00 | 0.94 | 0.74 | 15 | Matrix Fibroblast |
| Rpl10-ps3     | 0.83 | 0.00 | 0.00 | 0.92 | 0.72 | 15 | Matrix Fibroblast |
| Col6a1        | 1.09 | 0.00 | 0.00 | 0.52 | 0.18 | 15 | Matrix Fibroblast |
| Nr2f2         | 1.20 | 0.00 | 0.00 | 0.54 | 0.20 | 15 | Matrix Fibroblast |
| Nap1l1        | 1.14 | 0.00 | 0.00 | 0.76 | 0.46 | 15 | Matrix Fibroblast |
| Rps8          | 0.71 | 0.00 | 0.00 | 0.96 | 0.81 | 15 | Matrix Fibroblast |
| Sept4         | 0.98 | 0.00 | 0.00 | 0.59 | 0.22 | 15 | Matrix Fibroblast |
| Selenbp2      | 0.99 | 0.00 | 0.00 | 0.49 | 0.16 | 15 | Matrix Fibroblast |
| Gm26300       | 1.03 | 0.00 | 0.00 | 0.70 | 0.37 | 15 | Matrix Fibroblast |
| Meox2         | 0.99 | 0.00 | 0.00 | 0.32 | 0.07 | 15 | Matrix Fibroblast |

|            |      |      |      |      |      |    |                   |
|------------|------|------|------|------|------|----|-------------------|
| Rpl37a     | 0.67 | 0.00 | 0.00 | 0.95 | 0.83 | 15 | Matrix Fibroblast |
| Gm9846     | 0.59 | 0.00 | 0.00 | 0.98 | 0.90 | 15 | Matrix Fibroblast |
| Rps28      | 0.67 | 0.00 | 0.00 | 0.97 | 0.83 | 15 | Matrix Fibroblast |
| Fxyd1      | 0.99 | 0.00 | 0.00 | 0.33 | 0.09 | 15 | Matrix Fibroblast |
| Npnt       | 0.83 | 0.00 | 0.00 | 0.60 | 0.23 | 15 | Matrix Fibroblast |
| Bgn        | 0.93 | 0.00 | 0.00 | 0.58 | 0.23 | 15 | Matrix Fibroblast |
| Tns1       | 1.09 | 0.00 | 0.00 | 0.55 | 0.23 | 15 | Matrix Fibroblast |
| Rps29      | 0.57 | 0.00 | 0.00 | 0.98 | 0.90 | 15 | Matrix Fibroblast |
| Gm4204     | 1.03 | 0.00 | 0.00 | 0.76 | 0.50 | 15 | Matrix Fibroblast |
| Echdc2     | 0.93 | 0.00 | 0.00 | 0.26 | 0.06 | 15 | Matrix Fibroblast |
| Tmem176a   | 1.09 | 0.00 | 0.00 | 0.50 | 0.20 | 15 | Matrix Fibroblast |
| Fblim1     | 1.02 | 0.00 | 0.00 | 0.45 | 0.16 | 15 | Matrix Fibroblast |
| Gm5428     | 0.66 | 0.00 | 0.00 | 0.93 | 0.79 | 15 | Matrix Fibroblast |
| Macf1      | 0.70 | 0.00 | 0.00 | 0.83 | 0.52 | 15 | Matrix Fibroblast |
| Rpl36-ps3  | 0.86 | 0.00 | 0.00 | 0.78 | 0.53 | 15 | Matrix Fibroblast |
| Rps17      | 0.67 | 0.00 | 0.00 | 0.93 | 0.77 | 15 | Matrix Fibroblast |
| Peg3       | 0.90 | 0.00 | 0.00 | 0.63 | 0.29 | 15 | Matrix Fibroblast |
| Rpl37      | 0.65 | 0.00 | 0.00 | 0.93 | 0.80 | 15 | Matrix Fibroblast |
| Rpl13-ps3  | 0.66 | 0.00 | 0.00 | 0.92 | 0.75 | 15 | Matrix Fibroblast |
| Rps23      | 0.62 | 0.00 | 0.00 | 0.93 | 0.79 | 15 | Matrix Fibroblast |
| Rps16      | 0.61 | 0.00 | 0.00 | 0.95 | 0.84 | 15 | Matrix Fibroblast |
| Dpt        | 0.43 | 0.00 | 0.00 | 0.50 | 0.17 | 15 | Matrix Fibroblast |
| Rpl13      | 0.62 | 0.00 | 0.00 | 0.93 | 0.79 | 15 | Matrix Fibroblast |
| Rps15a     | 0.59 | 0.00 | 0.00 | 0.94 | 0.81 | 15 | Matrix Fibroblast |
| Rpl31      | 0.76 | 0.00 | 0.00 | 0.83 | 0.58 | 15 | Matrix Fibroblast |
| Rpl35a     | 0.60 | 0.00 | 0.00 | 0.92 | 0.79 | 15 | Matrix Fibroblast |
| Ndrp2      | 0.84 | 0.00 | 0.00 | 0.28 | 0.07 | 15 | Matrix Fibroblast |
| Cdo1       | 0.93 | 0.00 | 0.00 | 0.26 | 0.06 | 15 | Matrix Fibroblast |
| Mir682     | 0.54 | 0.00 | 0.00 | 0.95 | 0.85 | 15 | Matrix Fibroblast |
| Gas5       | 0.85 | 0.00 | 0.00 | 0.76 | 0.53 | 15 | Matrix Fibroblast |
| Rpl6       | 0.52 | 0.00 | 0.00 | 0.96 | 0.87 | 15 | Matrix Fibroblast |
| Ifitm2     | 0.86 | 0.00 | 0.00 | 0.61 | 0.31 | 15 | Matrix Fibroblast |
| Rpl10a-ps2 | 1.02 | 0.00 | 0.00 | 0.55 | 0.28 | 15 | Matrix Fibroblast |
| Col6a2     | 0.96 | 0.00 | 0.00 | 0.39 | 0.14 | 15 | Matrix Fibroblast |
| Plxdc2     | 0.81 | 0.00 | 0.00 | 0.37 | 0.12 | 15 | Matrix Fibroblast |
| Cp         | 0.89 | 0.00 | 0.00 | 0.36 | 0.12 | 15 | Matrix Fibroblast |
| Rpl39      | 0.55 | 0.00 | 0.00 | 0.94 | 0.80 | 15 | Matrix Fibroblast |
| Gm5786     | 0.87 | 0.00 | 0.00 | 0.64 | 0.39 | 15 | Matrix Fibroblast |
| Rps2-ps10  | 0.82 | 0.00 | 0.00 | 0.68 | 0.43 | 15 | Matrix Fibroblast |
| Gm24276    | 0.97 | 0.00 | 0.00 | 0.47 | 0.22 | 15 | Matrix Fibroblast |
| Eln        | 0.66 | 0.00 | 0.00 | 0.42 | 0.15 | 15 | Matrix Fibroblast |
| Rpl9       | 0.71 | 0.00 | 0.00 | 0.81 | 0.62 | 15 | Matrix Fibroblast |
| Enpep      | 0.89 | 0.00 | 0.00 | 0.31 | 0.10 | 15 | Matrix Fibroblast |

|           |      |      |      |      |      |    |                   |
|-----------|------|------|------|------|------|----|-------------------|
| Rpl36     | 0.68 | 0.00 | 0.00 | 0.82 | 0.63 | 15 | Matrix Fibroblast |
| Tbx2      | 0.88 | 0.00 | 0.00 | 0.34 | 0.11 | 15 | Matrix Fibroblast |
| Gpc3      | 0.73 | 0.00 | 0.00 | 0.42 | 0.16 | 15 | Matrix Fibroblast |
| Rpl21-ps6 | 0.83 | 0.00 | 0.00 | 0.67 | 0.43 | 15 | Matrix Fibroblast |
| Rps25     | 0.53 | 0.00 | 0.00 | 0.92 | 0.80 | 15 | Matrix Fibroblast |
| Gm10076   | 0.43 | 0.00 | 0.00 | 0.98 | 0.92 | 15 | Matrix Fibroblast |
| Palld     | 0.82 | 0.00 | 0.00 | 0.42 | 0.17 | 15 | Matrix Fibroblast |
| Gm25593   | 0.92 | 0.00 | 0.00 | 0.44 | 0.21 | 15 | Matrix Fibroblast |
| Ptms      | 0.77 | 0.00 | 0.00 | 0.64 | 0.39 | 15 | Matrix Fibroblast |
| Rpl38     | 0.55 | 0.00 | 0.00 | 0.89 | 0.73 | 15 | Matrix Fibroblast |
| Rpl36a    | 0.65 | 0.00 | 0.00 | 0.80 | 0.62 | 15 | Matrix Fibroblast |
| Lox       | 0.71 | 0.00 | 0.00 | 0.36 | 0.13 | 15 | Matrix Fibroblast |
| Zyx       | 0.89 | 0.00 | 0.00 | 0.43 | 0.19 | 15 | Matrix Fibroblast |
| Gm15013   | 0.81 | 0.00 | 0.00 | 0.60 | 0.36 | 15 | Matrix Fibroblast |
| Rps27a    | 0.51 | 0.00 | 0.00 | 0.91 | 0.76 | 15 | Matrix Fibroblast |
| Rps2-ps6  | 0.79 | 0.00 | 0.00 | 0.63 | 0.40 | 15 | Matrix Fibroblast |
| Rps3a3    | 0.51 | 0.00 | 0.00 | 0.91 | 0.77 | 15 | Matrix Fibroblast |
| Rpl34     | 0.50 | 0.00 | 0.00 | 0.91 | 0.80 | 15 | Matrix Fibroblast |
| Gm7808    | 0.64 | 0.00 | 0.00 | 0.78 | 0.59 | 15 | Matrix Fibroblast |
| Cdkn1c    | 0.75 | 0.00 | 0.00 | 0.42 | 0.18 | 15 | Matrix Fibroblast |
| Cd81      | 0.75 | 0.00 | 0.00 | 0.64 | 0.40 | 15 | Matrix Fibroblast |
| Rpl18a    | 0.48 | 0.00 | 0.00 | 0.93 | 0.82 | 15 | Matrix Fibroblast |
| Loxl1     | 0.74 | 0.00 | 0.00 | 0.30 | 0.10 | 15 | Matrix Fibroblast |
| Gm6133    | 0.79 | 0.00 | 0.00 | 0.57 | 0.34 | 15 | Matrix Fibroblast |
| Vldlr     | 0.91 | 0.00 | 0.00 | 0.30 | 0.11 | 15 | Matrix Fibroblast |
| Zfp36l1   | 0.83 | 0.00 | 0.00 | 0.66 | 0.45 | 15 | Matrix Fibroblast |
| Rps14     | 0.41 | 0.00 | 0.00 | 0.98 | 0.92 | 15 | Matrix Fibroblast |
| Rpl11     | 0.57 | 0.00 | 0.00 | 0.83 | 0.68 | 15 | Matrix Fibroblast |
| Mxra8     | 0.77 | 0.00 | 0.00 | 0.38 | 0.16 | 15 | Matrix Fibroblast |
| Gm5239    | 0.64 | 0.00 | 0.00 | 0.72 | 0.51 | 15 | Matrix Fibroblast |
| Gm6139    | 0.75 | 0.00 | 0.00 | 0.63 | 0.42 | 15 | Matrix Fibroblast |
| Rpl27a    | 0.49 | 0.00 | 0.00 | 0.91 | 0.78 | 15 | Matrix Fibroblast |
| Gm11808   | 0.50 | 0.00 | 0.00 | 0.89 | 0.77 | 15 | Matrix Fibroblast |
| Gm26384   | 0.67 | 0.00 | 0.00 | 0.69 | 0.48 | 15 | Matrix Fibroblast |
| Rps26-ps1 | 0.41 | 0.00 | 0.00 | 0.95 | 0.87 | 15 | Matrix Fibroblast |
| Rps13     | 0.58 | 0.00 | 0.00 | 0.80 | 0.64 | 15 | Matrix Fibroblast |
| Rpl26     | 0.47 | 0.00 | 0.00 | 0.91 | 0.81 | 15 | Matrix Fibroblast |
| Rpl23     | 0.41 | 0.00 | 0.00 | 0.94 | 0.87 | 15 | Matrix Fibroblast |
| Gm22426   | 0.65 | 0.00 | 0.00 | 0.69 | 0.48 | 15 | Matrix Fibroblast |
| Rps18     | 0.55 | 0.00 | 0.00 | 0.80 | 0.65 | 15 | Matrix Fibroblast |
| Gm6576    | 0.80 | 0.00 | 0.00 | 0.52 | 0.31 | 15 | Matrix Fibroblast |
| Gm10263   | 0.47 | 0.00 | 0.00 | 0.90 | 0.76 | 15 | Matrix Fibroblast |
| Mylk      | 0.63 | 0.00 | 0.00 | 0.52 | 0.27 | 15 | Matrix Fibroblast |

|               |      |      |      |      |      |    |                   |
|---------------|------|------|------|------|------|----|-------------------|
| Gm9493        | 0.50 | 0.00 | 0.00 | 0.85 | 0.74 | 15 | Matrix Fibroblast |
| Rps26         | 0.37 | 0.00 | 0.00 | 0.97 | 0.90 | 15 | Matrix Fibroblast |
| Gm5093        | 0.62 | 0.00 | 0.00 | 0.65 | 0.46 | 15 | Matrix Fibroblast |
| Sh3bgrl       | 0.64 | 0.00 | 0.00 | 0.65 | 0.44 | 15 | Matrix Fibroblast |
| Itga8         | 0.68 | 0.00 | 0.00 | 0.26 | 0.09 | 15 | Matrix Fibroblast |
| Rps7          | 0.49 | 0.00 | 0.00 | 0.84 | 0.74 | 15 | Matrix Fibroblast |
| Rpl9-ps6      | 0.50 | 0.00 | 0.00 | 0.84 | 0.73 | 15 | Matrix Fibroblast |
| 0610007N19Rik | 0.81 | 0.00 | 0.00 | 0.33 | 0.14 | 15 | Matrix Fibroblast |
| Tmem254a      | 0.89 | 0.00 | 0.00 | 0.38 | 0.19 | 15 | Matrix Fibroblast |
| Rpl27         | 0.50 | 0.00 | 0.00 | 0.84 | 0.69 | 15 | Matrix Fibroblast |
| Gm5244        | 0.78 | 0.00 | 0.00 | 0.47 | 0.28 | 15 | Matrix Fibroblast |
| Rpl28         | 0.63 | 0.00 | 0.00 | 0.69 | 0.53 | 15 | Matrix Fibroblast |
| Rps12         | 0.48 | 0.00 | 0.00 | 0.84 | 0.68 | 15 | Matrix Fibroblast |
| Gm10709       | 0.79 | 0.00 | 0.00 | 0.46 | 0.27 | 15 | Matrix Fibroblast |
| Tmem254b      | 0.89 | 0.00 | 0.00 | 0.38 | 0.19 | 15 | Matrix Fibroblast |
| Camk2n1       | 0.85 | 0.00 | 0.00 | 0.32 | 0.14 | 15 | Matrix Fibroblast |
| Rpl41         | 0.32 | 0.00 | 0.00 | 0.98 | 0.95 | 15 | Matrix Fibroblast |
| Rpl35         | 0.43 | 0.00 | 0.00 | 0.89 | 0.80 | 15 | Matrix Fibroblast |
| Nenf          | 0.75 | 0.00 | 0.00 | 0.37 | 0.18 | 15 | Matrix Fibroblast |
| Rps18-ps3     | 0.56 | 0.00 | 0.00 | 0.71 | 0.56 | 15 | Matrix Fibroblast |
| Ifitm3        | 0.58 | 0.00 | 0.00 | 0.61 | 0.39 | 15 | Matrix Fibroblast |
| Csrp1         | 0.83 | 0.00 | 0.00 | 0.34 | 0.16 | 15 | Matrix Fibroblast |
| Eif4ebp1      | 0.82 | 0.00 | 0.00 | 0.30 | 0.13 | 15 | Matrix Fibroblast |
| Rpl21-ps4     | 0.67 | 0.00 | 0.00 | 0.53 | 0.35 | 15 | Matrix Fibroblast |
| Rpl3          | 0.52 | 0.00 | 0.00 | 0.75 | 0.63 | 15 | Matrix Fibroblast |
| Rps3a2        | 0.37 | 0.00 | 0.00 | 0.93 | 0.82 | 15 | Matrix Fibroblast |
| Rpl17         | 0.55 | 0.00 | 0.00 | 0.70 | 0.53 | 15 | Matrix Fibroblast |
| Cox6c         | 0.52 | 0.00 | 0.00 | 0.76 | 0.65 | 15 | Matrix Fibroblast |
| Gm7589        | 0.47 | 0.00 | 0.00 | 0.78 | 0.65 | 15 | Matrix Fibroblast |
| Rps19         | 0.34 | 0.00 | 0.00 | 0.93 | 0.82 | 15 | Matrix Fibroblast |
| Snai2         | 0.75 | 0.00 | 0.00 | 0.28 | 0.12 | 15 | Matrix Fibroblast |
| Tmem254c      | 0.82 | 0.00 | 0.00 | 0.35 | 0.18 | 15 | Matrix Fibroblast |
| Gm8730        | 0.37 | 0.00 | 0.00 | 0.90 | 0.82 | 15 | Matrix Fibroblast |
| Socs2         | 0.69 | 0.00 | 0.00 | 0.52 | 0.33 | 15 | Matrix Fibroblast |
| Gm10036       | 0.42 | 0.00 | 0.00 | 0.84 | 0.74 | 15 | Matrix Fibroblast |
| Ech1          | 0.79 | 0.00 | 0.00 | 0.31 | 0.15 | 15 | Matrix Fibroblast |
| Rap2a         | 0.78 | 0.00 | 0.00 | 0.32 | 0.15 | 15 | Matrix Fibroblast |
| Rplp0         | 0.35 | 0.00 | 0.00 | 0.91 | 0.83 | 15 | Matrix Fibroblast |
| Gm6472        | 0.38 | 0.00 | 0.00 | 0.87 | 0.80 | 15 | Matrix Fibroblast |
| Akap12        | 0.63 | 0.00 | 0.00 | 0.43 | 0.24 | 15 | Matrix Fibroblast |
| Tpm1          | 0.39 | 0.00 | 0.00 | 0.71 | 0.51 | 15 | Matrix Fibroblast |
| Gm24865       | 0.45 | 0.00 | 0.00 | 0.75 | 0.62 | 15 | Matrix Fibroblast |
| Gm7536        | 0.36 | 0.00 | 0.00 | 0.91 | 0.82 | 15 | Matrix Fibroblast |

|               |      |      |      |      |      |    |                   |
|---------------|------|------|------|------|------|----|-------------------|
| Rps21         | 0.37 | 0.00 | 0.00 | 0.86 | 0.75 | 15 | Matrix Fibroblast |
| mt-Co1        | 0.29 | 0.00 | 0.00 | 0.98 | 0.95 | 15 | Matrix Fibroblast |
| Rplp2         | 0.34 | 0.00 | 0.00 | 0.89 | 0.81 | 15 | Matrix Fibroblast |
| Rpl13a-ps1    | 0.45 | 0.00 | 0.00 | 0.69 | 0.55 | 15 | Matrix Fibroblast |
| Rpl15         | 0.46 | 0.00 | 0.00 | 0.70 | 0.58 | 15 | Matrix Fibroblast |
| Rps3          | 0.34 | 0.00 | 0.00 | 0.90 | 0.83 | 15 | Matrix Fibroblast |
| Gm2000        | 0.35 | 0.00 | 0.00 | 0.90 | 0.84 | 15 | Matrix Fibroblast |
| Rpl10a        | 0.39 | 0.00 | 0.00 | 0.82 | 0.74 | 15 | Matrix Fibroblast |
| Tmem176b      | 0.66 | 0.00 | 0.00 | 0.49 | 0.34 | 15 | Matrix Fibroblast |
| Limd1         | 0.73 | 0.00 | 0.00 | 0.32 | 0.18 | 15 | Matrix Fibroblast |
| Rpl19         | 0.37 | 0.00 | 0.00 | 0.84 | 0.75 | 15 | Matrix Fibroblast |
| Rps2          | 0.41 | 0.00 | 0.00 | 0.77 | 0.67 | 15 | Matrix Fibroblast |
| Rpl30         | 0.47 | 0.00 | 0.00 | 0.69 | 0.59 | 15 | Matrix Fibroblast |
| Eva1b         | 0.64 | 0.00 | 0.00 | 0.35 | 0.20 | 15 | Matrix Fibroblast |
| Gm10288       | 0.34 | 0.00 | 0.00 | 0.86 | 0.78 | 15 | Matrix Fibroblast |
| Rpl27-ps3     | 0.35 | 0.00 | 0.00 | 0.85 | 0.76 | 15 | Matrix Fibroblast |
| Rarres2       | 0.56 | 0.00 | 0.00 | 0.27 | 0.13 | 15 | Matrix Fibroblast |
| Gm17511       | 0.40 | 0.00 | 0.00 | 0.73 | 0.61 | 15 | Matrix Fibroblast |
| Rpl14         | 0.31 | 0.00 | 0.00 | 0.90 | 0.84 | 15 | Matrix Fibroblast |
| Cnn2          | 0.58 | 0.00 | 0.00 | 0.53 | 0.39 | 15 | Matrix Fibroblast |
| Ppap2b        | 0.62 | 0.00 | 0.00 | 0.39 | 0.24 | 15 | Matrix Fibroblast |
| Fibin         | 0.53 | 0.00 | 0.00 | 0.26 | 0.12 | 15 | Matrix Fibroblast |
| Ypel3         | 0.60 | 0.00 | 0.00 | 0.35 | 0.20 | 15 | Matrix Fibroblast |
| Rps3a1        | 0.27 | 0.00 | 0.00 | 0.93 | 0.85 | 15 | Matrix Fibroblast |
| Gm17430       | 0.72 | 0.00 | 0.00 | 0.26 | 0.14 | 15 | Matrix Fibroblast |
| Rps12-ps3     | 0.31 | 0.00 | 0.00 | 0.88 | 0.79 | 15 | Matrix Fibroblast |
| Nupr1         | 0.49 | 0.00 | 0.00 | 0.33 | 0.18 | 15 | Matrix Fibroblast |
| Rpl7a         | 0.57 | 0.00 | 0.00 | 0.51 | 0.39 | 15 | Matrix Fibroblast |
| Rpl7a-ps10    | 0.61 | 0.00 | 0.00 | 0.39 | 0.26 | 15 | Matrix Fibroblast |
| Rps15         | 0.33 | 0.00 | 0.00 | 0.84 | 0.78 | 15 | Matrix Fibroblast |
| Gm16519       | 0.62 | 0.00 | 0.00 | 0.27 | 0.15 | 15 | Matrix Fibroblast |
| Rpl32         | 0.27 | 0.00 | 0.00 | 0.91 | 0.84 | 15 | Matrix Fibroblast |
| Sec61g        | 0.53 | 0.00 | 0.00 | 0.47 | 0.35 | 15 | Matrix Fibroblast |
| Nfib          | 0.45 | 0.00 | 0.00 | 0.62 | 0.47 | 15 | Matrix Fibroblast |
| 2410006H16Rik | 0.63 | 0.00 | 0.00 | 0.39 | 0.26 | 15 | Matrix Fibroblast |
| Plin2         | 0.56 | 0.00 | 0.00 | 0.25 | 0.13 | 15 | Matrix Fibroblast |
| Gm10260       | 0.43 | 0.00 | 0.00 | 0.59 | 0.49 | 15 | Matrix Fibroblast |
| Hmgb1         | 0.38 | 0.00 | 0.00 | 0.71 | 0.61 | 15 | Matrix Fibroblast |
| Gm26669       | 0.71 | 0.00 | 0.00 | 0.35 | 0.22 | 15 | Matrix Fibroblast |
| Maged2        | 0.54 | 0.00 | 0.00 | 0.29 | 0.17 | 15 | Matrix Fibroblast |
| Prdx5         | 0.43 | 0.00 | 0.00 | 0.45 | 0.32 | 15 | Matrix Fibroblast |
| Rpl7a-ps5     | 0.50 | 0.00 | 0.00 | 0.47 | 0.37 | 15 | Matrix Fibroblast |
| Hadh          | 0.60 | 0.00 | 0.00 | 0.28 | 0.17 | 15 | Matrix Fibroblast |

|               |      |      |      |      |      |    |                   |
|---------------|------|------|------|------|------|----|-------------------|
| Pbx1          | 0.63 | 0.00 | 0.00 | 0.31 | 0.20 | 15 | Matrix Fibroblast |
| Emd           | 0.48 | 0.00 | 0.00 | 0.49 | 0.40 | 15 | Matrix Fibroblast |
| Rpl29         | 0.46 | 0.00 | 0.00 | 0.54 | 0.46 | 15 | Matrix Fibroblast |
| Gm20091       | 0.53 | 0.00 | 0.00 | 0.33 | 0.22 | 15 | Matrix Fibroblast |
| Gnas          | 0.31 | 0.00 | 0.00 | 0.75 | 0.67 | 15 | Matrix Fibroblast |
| Cpm           | 0.50 | 0.00 | 0.00 | 0.30 | 0.18 | 15 | Matrix Fibroblast |
| Rps10         | 0.29 | 0.00 | 0.00 | 0.76 | 0.70 | 15 | Matrix Fibroblast |
| Pdlim2        | 0.52 | 0.00 | 0.00 | 0.28 | 0.18 | 15 | Matrix Fibroblast |
| Eif3e         | 0.52 | 0.00 | 0.00 | 0.47 | 0.40 | 15 | Matrix Fibroblast |
| Scp2          | 0.51 | 0.00 | 0.00 | 0.42 | 0.33 | 15 | Matrix Fibroblast |
| Gng11         | 0.41 | 0.00 | 0.00 | 0.41 | 0.29 | 15 | Matrix Fibroblast |
| Mesdc2        | 0.59 | 0.00 | 0.00 | 0.29 | 0.19 | 15 | Matrix Fibroblast |
| Tacc1         | 0.56 | 0.00 | 0.00 | 0.33 | 0.22 | 15 | Matrix Fibroblast |
| Tagln2        | 0.39 | 0.00 | 0.00 | 0.53 | 0.45 | 15 | Matrix Fibroblast |
| Gm10020       | 0.36 | 0.00 | 0.00 | 0.59 | 0.52 | 15 | Matrix Fibroblast |
| Atp5l         | 0.42 | 0.00 | 0.00 | 0.51 | 0.44 | 15 | Matrix Fibroblast |
| Aldh2         | 0.41 | 0.00 | 0.00 | 0.43 | 0.33 | 15 | Matrix Fibroblast |
| Rpl22l1       | 0.32 | 0.00 | 0.00 | 0.61 | 0.56 | 15 | Matrix Fibroblast |
| Gm10221       | 0.37 | 0.00 | 0.00 | 0.51 | 0.46 | 15 | Matrix Fibroblast |
| Itgam         | 0.39 | 0.00 | 0.00 | 0.36 | 0.28 | 15 | Matrix Fibroblast |
| Cirbp         | 0.49 | 0.00 | 0.00 | 0.29 | 0.21 | 15 | Matrix Fibroblast |
| Fbn1          | 0.33 | 0.00 | 0.00 | 0.26 | 0.17 | 15 | Matrix Fibroblast |
| Nfia          | 0.48 | 0.00 | 0.00 | 0.32 | 0.24 | 15 | Matrix Fibroblast |
| Rpl12         | 0.27 | 0.00 | 0.00 | 0.61 | 0.55 | 15 | Matrix Fibroblast |
| Cd63          | 0.35 | 0.00 | 0.00 | 0.38 | 0.30 | 15 | Matrix Fibroblast |
| Igfbp4        | 0.33 | 0.00 | 0.00 | 0.33 | 0.25 | 15 | Matrix Fibroblast |
| Sqstm1        | 0.42 | 0.00 | 0.00 | 0.37 | 0.32 | 15 | Matrix Fibroblast |
| Gm17669       | 0.46 | 0.00 | 0.00 | 0.28 | 0.22 | 15 | Matrix Fibroblast |
| Cox6a1        | 0.33 | 0.00 | 0.00 | 0.56 | 0.55 | 15 | Matrix Fibroblast |
| 1810058l24Rik | 0.49 | 0.00 | 0.00 | 0.27 | 0.20 | 15 | Matrix Fibroblast |
| Sepw1         | 0.45 | 0.00 | 0.00 | 0.26 | 0.20 | 15 | Matrix Fibroblast |
| D4Wsu53e      | 0.28 | 0.00 | 0.00 | 0.61 | 0.60 | 15 | Matrix Fibroblast |
| Pfdn5         | 0.29 | 0.00 | 0.00 | 0.52 | 0.50 | 15 | Matrix Fibroblast |
| Morf4l1       | 0.30 | 0.00 | 0.00 | 0.57 | 0.55 | 15 | Matrix Fibroblast |
| Celf2         | 0.37 | 0.00 | 0.00 | 0.34 | 0.28 | 15 | Matrix Fibroblast |
| Ilk           | 0.41 | 0.00 | 0.00 | 0.28 | 0.23 | 15 | Matrix Fibroblast |
| Gm5619        | 0.39 | 0.00 | 0.00 | 0.37 | 0.33 | 15 | Matrix Fibroblast |
| Uqcrh         | 0.36 | 0.00 | 0.00 | 0.49 | 0.47 | 15 | Matrix Fibroblast |
| Sh3bp5        | 0.34 | 0.00 | 0.00 | 0.25 | 0.19 | 15 | Matrix Fibroblast |
| Orc5          | 0.26 | 0.00 | 0.00 | 0.58 | 0.56 | 15 | Matrix Fibroblast |
| Gpx4          | 0.32 | 0.00 | 0.00 | 0.42 | 0.38 | 15 | Matrix Fibroblast |
| Nisch         | 0.38 | 0.00 | 0.00 | 0.35 | 0.30 | 15 | Matrix Fibroblast |
| Map1lc3b      | 0.37 | 0.00 | 0.00 | 0.42 | 0.40 | 15 | Matrix Fibroblast |

|           |      |      |      |      |      |    |                   |
|-----------|------|------|------|------|------|----|-------------------|
| Atp5l-ps1 | 0.34 | 0.00 | 0.01 | 0.31 | 0.28 | 15 | Matrix Fibroblast |
| Gm10320   | 0.35 | 0.00 | 0.02 | 0.41 | 0.39 | 15 | Matrix Fibroblast |
| Wsb1      | 0.42 | 0.00 | 0.02 | 0.25 | 0.21 | 15 | Matrix Fibroblast |
| Eif3f     | 0.30 | 0.00 | 0.04 | 0.39 | 0.36 | 15 | Matrix Fibroblast |
| Fbln2     | 2.52 | 0.00 | 0.00 | 0.74 | 0.06 | 16 | Endothelial       |
| Vwf       | 2.31 | 0.00 | 0.00 | 0.72 | 0.02 | 16 | Endothelial       |
| Fbln5     | 2.20 | 0.00 | 0.00 | 0.83 | 0.16 | 16 | Endothelial       |
| Ptprb     | 2.11 | 0.00 | 0.00 | 0.95 | 0.20 | 16 | Endothelial       |
| Fabp4     | 1.67 | 0.00 | 0.00 | 0.32 | 0.03 | 16 | Endothelial       |
| Tm4sf1    | 1.65 | 0.00 | 0.00 | 0.81 | 0.20 | 16 | Endothelial       |
| Prss23    | 1.52 | 0.00 | 0.00 | 0.48 | 0.06 | 16 | Endothelial       |
| Car8      | 1.51 | 0.00 | 0.00 | 0.47 | 0.07 | 16 | Endothelial       |
| Cpe       | 1.48 | 0.00 | 0.00 | 0.37 | 0.02 | 16 | Endothelial       |
| Stmn2     | 1.43 | 0.00 | 0.00 | 0.65 | 0.15 | 16 | Endothelial       |
| Lyve1     | 1.41 | 0.00 | 0.00 | 0.81 | 0.21 | 16 | Endothelial       |
| Edn1      | 1.39 | 0.00 | 0.00 | 0.54 | 0.09 | 16 | Endothelial       |
| Heg1      | 1.35 | 0.00 | 0.00 | 0.65 | 0.15 | 16 | Endothelial       |
| Gpr126    | 1.35 | 0.00 | 0.00 | 0.54 | 0.10 | 16 | Endothelial       |
| Tmem2     | 1.32 | 0.00 | 0.00 | 0.64 | 0.14 | 16 | Endothelial       |
| Bmx       | 1.31 | 0.00 | 0.00 | 0.29 | 0.02 | 16 | Endothelial       |
| Ackr3     | 1.29 | 0.00 | 0.00 | 0.38 | 0.04 | 16 | Endothelial       |
| Jam2      | 1.19 | 0.00 | 0.00 | 0.43 | 0.06 | 16 | Endothelial       |
| Thsd7a    | 1.19 | 0.00 | 0.00 | 0.30 | 0.02 | 16 | Endothelial       |
| Calcr1    | 1.16 | 0.00 | 0.00 | 0.85 | 0.24 | 16 | Endothelial       |
| Tek       | 1.13 | 0.00 | 0.00 | 0.58 | 0.12 | 16 | Endothelial       |
| Cthrc1    | 0.96 | 0.00 | 0.00 | 0.28 | 0.02 | 16 | Endothelial       |
| Procr     | 0.96 | 0.00 | 0.00 | 0.29 | 0.01 | 16 | Endothelial       |
| Samd5     | 0.93 | 0.00 | 0.00 | 0.30 | 0.03 | 16 | Endothelial       |
| Plvap     | 1.26 | 0.00 | 0.00 | 0.57 | 0.12 | 16 | Endothelial       |
| Flt1      | 1.18 | 0.00 | 0.00 | 0.64 | 0.15 | 16 | Endothelial       |
| Pecam1    | 1.12 | 0.00 | 0.00 | 0.80 | 0.23 | 16 | Endothelial       |
| Clec14a   | 1.07 | 0.00 | 0.00 | 0.68 | 0.17 | 16 | Endothelial       |
| Pgm5      | 0.85 | 0.00 | 0.00 | 0.25 | 0.03 | 16 | Endothelial       |
| Ramp2     | 1.00 | 0.00 | 0.00 | 0.84 | 0.27 | 16 | Endothelial       |
| Egfl7     | 0.94 | 0.00 | 0.00 | 0.87 | 0.27 | 16 | Endothelial       |
| Cd59a     | 1.14 | 0.00 | 0.00 | 0.43 | 0.08 | 16 | Endothelial       |
| Mmrn2     | 0.87 | 0.00 | 0.00 | 0.30 | 0.04 | 16 | Endothelial       |
| Sdpr      | 1.15 | 0.00 | 0.00 | 0.95 | 0.51 | 16 | Endothelial       |
| Ltbp4     | 1.16 | 0.00 | 0.00 | 0.47 | 0.10 | 16 | Endothelial       |
| Fam101b   | 1.40 | 0.00 | 0.00 | 0.60 | 0.18 | 16 | Endothelial       |
| Fstl1     | 1.03 | 0.00 | 0.00 | 0.91 | 0.44 | 16 | Endothelial       |
| Palmd     | 1.00 | 0.00 | 0.00 | 0.52 | 0.12 | 16 | Endothelial       |
| Fgl2      | 0.94 | 0.00 | 0.00 | 0.26 | 0.03 | 16 | Endothelial       |

|         |      |      |      |      |      |    |             |
|---------|------|------|------|------|------|----|-------------|
| Cd93    | 0.84 | 0.00 | 0.00 | 0.71 | 0.21 | 16 | Endothelial |
| Aplnr   | 1.01 | 0.00 | 0.00 | 0.35 | 0.07 | 16 | Endothelial |
| Megf6   | 0.78 | 0.00 | 0.00 | 0.26 | 0.04 | 16 | Endothelial |
| Ece1    | 1.06 | 0.00 | 0.00 | 0.69 | 0.25 | 16 | Endothelial |
| Cxcl12  | 2.33 | 0.00 | 0.00 | 0.45 | 0.12 | 16 | Endothelial |
| Cd200   | 1.02 | 0.00 | 0.00 | 0.71 | 0.27 | 16 | Endothelial |
| Col5a2  | 1.21 | 0.00 | 0.00 | 0.56 | 0.17 | 16 | Endothelial |
| Tie1    | 0.85 | 0.00 | 0.00 | 0.45 | 0.11 | 16 | Endothelial |
| Jag1    | 0.95 | 0.00 | 0.00 | 0.27 | 0.05 | 16 | Endothelial |
| Cldn5   | 0.80 | 0.00 | 0.00 | 0.67 | 0.22 | 16 | Endothelial |
| S100a16 | 0.88 | 0.00 | 0.00 | 0.67 | 0.23 | 16 | Endothelial |
| Aqp1    | 0.91 | 0.00 | 0.00 | 0.60 | 0.19 | 16 | Endothelial |
| Ctla2a  | 1.15 | 0.00 | 0.00 | 0.60 | 0.20 | 16 | Endothelial |
| Tspan7  | 0.81 | 0.00 | 0.00 | 0.64 | 0.21 | 16 | Endothelial |
| Ehd4    | 0.90 | 0.00 | 0.00 | 0.70 | 0.27 | 16 | Endothelial |
| Id3     | 0.92 | 0.00 | 0.00 | 0.85 | 0.45 | 16 | Endothelial |
| Gja4    | 1.07 | 0.00 | 0.00 | 0.31 | 0.07 | 16 | Endothelial |
| Adam15  | 0.75 | 0.00 | 0.00 | 0.35 | 0.08 | 16 | Endothelial |
| Adcy4   | 0.81 | 0.00 | 0.00 | 0.36 | 0.08 | 16 | Endothelial |
| Entpd1  | 0.91 | 0.00 | 0.00 | 0.37 | 0.09 | 16 | Endothelial |
| Tgm2    | 0.83 | 0.00 | 0.00 | 0.37 | 0.09 | 16 | Endothelial |
| Cdh5    | 0.59 | 0.00 | 0.00 | 0.68 | 0.22 | 16 | Endothelial |
| Csrp2   | 0.99 | 0.00 | 0.00 | 0.50 | 0.16 | 16 | Endothelial |
| Meis2   | 0.83 | 0.00 | 0.00 | 0.43 | 0.11 | 16 | Endothelial |
| Plk2    | 1.01 | 0.00 | 0.00 | 0.49 | 0.16 | 16 | Endothelial |
| Foxp1   | 0.89 | 0.00 | 0.00 | 0.81 | 0.44 | 16 | Endothelial |
| Ecscr   | 0.67 | 0.00 | 0.00 | 0.53 | 0.16 | 16 | Endothelial |
| Igf2    | 1.39 | 0.00 | 0.00 | 0.31 | 0.07 | 16 | Endothelial |
| Ephb4   | 0.75 | 0.00 | 0.00 | 0.33 | 0.08 | 16 | Endothelial |
| Fgd5    | 0.68 | 0.00 | 0.00 | 0.29 | 0.06 | 16 | Endothelial |
| Srgn    | 0.82 | 0.00 | 0.00 | 0.74 | 0.32 | 16 | Endothelial |
| Sema3g  | 0.99 | 0.00 | 0.00 | 0.30 | 0.07 | 16 | Endothelial |
| Cd9     | 0.84 | 0.00 | 0.00 | 0.73 | 0.34 | 16 | Endothelial |
| Efnb2   | 1.06 | 0.00 | 0.00 | 0.45 | 0.14 | 16 | Endothelial |
| She     | 0.70 | 0.00 | 0.00 | 0.27 | 0.06 | 16 | Endothelial |
| Epas1   | 0.67 | 0.00 | 0.00 | 0.66 | 0.25 | 16 | Endothelial |
| Slc43a3 | 0.84 | 0.00 | 0.00 | 0.57 | 0.21 | 16 | Endothelial |
| Foxo1   | 0.76 | 0.00 | 0.00 | 0.32 | 0.08 | 16 | Endothelial |
| Emcn    | 0.75 | 0.00 | 0.00 | 0.39 | 0.11 | 16 | Endothelial |
| Acer2   | 0.80 | 0.00 | 0.00 | 0.36 | 0.10 | 16 | Endothelial |
| Erg     | 0.78 | 0.00 | 0.00 | 0.43 | 0.13 | 16 | Endothelial |
| Cav1    | 0.73 | 0.00 | 0.00 | 0.70 | 0.31 | 16 | Endothelial |
| Plxnd1  | 0.76 | 0.00 | 0.00 | 0.30 | 0.07 | 16 | Endothelial |

|               |      |      |      |      |      |    |             |
|---------------|------|------|------|------|------|----|-------------|
| Eln           | 0.91 | 0.00 | 0.00 | 0.46 | 0.15 | 16 | Endothelial |
| Rasip1        | 0.66 | 0.00 | 0.00 | 0.39 | 0.12 | 16 | Endothelial |
| Myct1         | 0.67 | 0.00 | 0.00 | 0.41 | 0.13 | 16 | Endothelial |
| Rhoj          | 0.74 | 0.00 | 0.00 | 0.50 | 0.18 | 16 | Endothelial |
| Ripply3       | 0.95 | 0.00 | 0.00 | 0.39 | 0.12 | 16 | Endothelial |
| Ptrf          | 0.85 | 0.00 | 0.00 | 0.68 | 0.35 | 16 | Endothelial |
| Hyal2         | 0.67 | 0.00 | 0.00 | 0.29 | 0.07 | 16 | Endothelial |
| Icam2         | 0.60 | 0.00 | 0.00 | 0.47 | 0.16 | 16 | Endothelial |
| Ace           | 0.78 | 0.00 | 0.00 | 0.41 | 0.13 | 16 | Endothelial |
| Tmem88        | 0.73 | 0.00 | 0.00 | 0.36 | 0.10 | 16 | Endothelial |
| Ctla2b        | 0.63 | 0.00 | 0.00 | 0.28 | 0.07 | 16 | Endothelial |
| Ifitm3        | 0.65 | 0.00 | 0.00 | 0.76 | 0.39 | 16 | Endothelial |
| Id1           | 0.80 | 0.00 | 0.00 | 0.56 | 0.23 | 16 | Endothelial |
| Esam          | 0.61 | 0.00 | 0.00 | 0.50 | 0.18 | 16 | Endothelial |
| Rnf144a       | 0.77 | 0.00 | 0.00 | 0.44 | 0.15 | 16 | Endothelial |
| Igfbp4        | 0.89 | 0.00 | 0.00 | 0.56 | 0.25 | 16 | Endothelial |
| Ceacam1       | 0.68 | 0.00 | 0.00 | 0.32 | 0.09 | 16 | Endothelial |
| Cbfa2t3       | 0.73 | 0.00 | 0.00 | 0.41 | 0.14 | 16 | Endothelial |
| Gata6         | 0.79 | 0.00 | 0.00 | 0.30 | 0.08 | 16 | Endothelial |
| Plcb4         | 0.79 | 0.00 | 0.00 | 0.40 | 0.14 | 16 | Endothelial |
| Slc9a3r2      | 0.66 | 0.00 | 0.00 | 0.52 | 0.20 | 16 | Endothelial |
| Gata2         | 0.60 | 0.00 | 0.00 | 0.41 | 0.14 | 16 | Endothelial |
| Prcp          | 0.62 | 0.00 | 0.00 | 0.31 | 0.09 | 16 | Endothelial |
| Armcx1        | 0.71 | 0.00 | 0.00 | 0.31 | 0.09 | 16 | Endothelial |
| Myzap         | 0.60 | 0.00 | 0.00 | 0.41 | 0.14 | 16 | Endothelial |
| Tspan6        | 0.59 | 0.00 | 0.00 | 0.29 | 0.08 | 16 | Endothelial |
| Dst           | 0.74 | 0.00 | 0.00 | 0.38 | 0.13 | 16 | Endothelial |
| Smad7         | 0.74 | 0.00 | 0.00 | 0.35 | 0.11 | 16 | Endothelial |
| Prkcdbp       | 0.69 | 0.00 | 0.00 | 0.34 | 0.11 | 16 | Endothelial |
| Tnfsf10       | 0.62 | 0.00 | 0.00 | 0.29 | 0.08 | 16 | Endothelial |
| Crim1         | 0.69 | 0.00 | 0.00 | 0.29 | 0.09 | 16 | Endothelial |
| Fkbp1a        | 0.64 | 0.00 | 0.00 | 0.70 | 0.40 | 16 | Endothelial |
| Itgb1         | 0.65 | 0.00 | 0.00 | 0.84 | 0.63 | 16 | Endothelial |
| Cav2          | 0.59 | 0.00 | 0.00 | 0.47 | 0.19 | 16 | Endothelial |
| Utrn          | 0.88 | 0.00 | 0.00 | 0.41 | 0.16 | 16 | Endothelial |
| Ednrb         | 0.56 | 0.00 | 0.00 | 0.41 | 0.15 | 16 | Endothelial |
| Elk3          | 0.65 | 0.00 | 0.00 | 0.38 | 0.13 | 16 | Endothelial |
| Notch1        | 0.70 | 0.00 | 0.00 | 0.37 | 0.13 | 16 | Endothelial |
| 2900026A02Rik | 0.58 | 0.00 | 0.00 | 0.27 | 0.08 | 16 | Endothelial |
| Acvrl1        | 0.56 | 0.00 | 0.00 | 0.45 | 0.17 | 16 | Endothelial |
| Hsp90ab1      | 0.40 | 0.00 | 0.00 | 0.96 | 0.89 | 16 | Endothelial |
| Pcsk5         | 0.85 | 0.00 | 0.00 | 0.30 | 0.10 | 16 | Endothelial |
| Hoxa5         | 0.65 | 0.00 | 0.00 | 0.36 | 0.13 | 16 | Endothelial |

|               |      |      |      |      |      |    |             |
|---------------|------|------|------|------|------|----|-------------|
| Rab11a        | 0.69 | 0.00 | 0.00 | 0.53 | 0.26 | 16 | Endothelial |
| 4931406P16Rik | 0.59 | 0.00 | 0.00 | 0.44 | 0.18 | 16 | Endothelial |
| Ccdc80        | 0.63 | 0.00 | 0.00 | 0.32 | 0.11 | 16 | Endothelial |
| Eng           | 0.56 | 0.00 | 0.00 | 0.32 | 0.11 | 16 | Endothelial |
| Slk           | 0.65 | 0.00 | 0.00 | 0.70 | 0.43 | 16 | Endothelial |
| Mcam          | 0.50 | 0.00 | 0.00 | 0.36 | 0.13 | 16 | Endothelial |
| Klf4          | 0.57 | 0.00 | 0.00 | 0.51 | 0.23 | 16 | Endothelial |
| Cyyr1         | 0.47 | 0.00 | 0.00 | 0.39 | 0.15 | 16 | Endothelial |
| Ehd2          | 0.59 | 0.00 | 0.00 | 0.37 | 0.14 | 16 | Endothelial |
| Podxl         | 0.50 | 0.00 | 0.00 | 0.31 | 0.11 | 16 | Endothelial |
| Luzp1         | 0.63 | 0.00 | 0.00 | 0.44 | 0.20 | 16 | Endothelial |
| Fam3c         | 0.95 | 0.00 | 0.00 | 0.33 | 0.13 | 16 | Endothelial |
| Sox17         | 0.61 | 0.00 | 0.00 | 0.35 | 0.14 | 16 | Endothelial |
| Ldb2          | 0.59 | 0.00 | 0.00 | 0.39 | 0.16 | 16 | Endothelial |
| Gnaq          | 0.57 | 0.00 | 0.00 | 0.45 | 0.21 | 16 | Endothelial |
| Apbb2         | 0.56 | 0.00 | 0.00 | 0.27 | 0.09 | 16 | Endothelial |
| Nrp1          | 0.51 | 0.00 | 0.00 | 0.67 | 0.39 | 16 | Endothelial |
| Aplp2         | 0.60 | 0.00 | 0.00 | 0.64 | 0.39 | 16 | Endothelial |
| Cd2ap         | 0.68 | 0.00 | 0.00 | 0.59 | 0.34 | 16 | Endothelial |
| S1pr1         | 0.46 | 0.00 | 0.00 | 0.43 | 0.18 | 16 | Endothelial |
| Gng11         | 0.45 | 0.00 | 0.00 | 0.57 | 0.29 | 16 | Endothelial |
| Ushbp1        | 0.50 | 0.00 | 0.00 | 0.26 | 0.09 | 16 | Endothelial |
| Slfn5         | 0.46 | 0.00 | 0.00 | 0.27 | 0.10 | 16 | Endothelial |
| Fnbp1l        | 0.50 | 0.00 | 0.00 | 0.50 | 0.25 | 16 | Endothelial |
| Mecom         | 0.79 | 0.00 | 0.00 | 0.27 | 0.10 | 16 | Endothelial |
| Azin1         | 0.71 | 0.00 | 0.00 | 0.32 | 0.13 | 16 | Endothelial |
| Gimap1        | 0.41 | 0.00 | 0.00 | 0.34 | 0.14 | 16 | Endothelial |
| Cmip          | 0.60 | 0.00 | 0.00 | 0.41 | 0.20 | 16 | Endothelial |
| Cd151         | 0.53 | 0.00 | 0.00 | 0.36 | 0.16 | 16 | Endothelial |
| Slc6a6        | 0.73 | 0.00 | 0.00 | 0.47 | 0.25 | 16 | Endothelial |
| Slc16a2       | 0.57 | 0.00 | 0.00 | 0.26 | 0.10 | 16 | Endothelial |
| Nav1          | 0.45 | 0.00 | 0.00 | 0.29 | 0.11 | 16 | Endothelial |
| Hmcn1         | 0.53 | 0.00 | 0.00 | 0.32 | 0.13 | 16 | Endothelial |
| Ppap2a        | 0.42 | 0.00 | 0.00 | 0.41 | 0.19 | 16 | Endothelial |
| Mcfd2         | 0.50 | 0.00 | 0.00 | 0.29 | 0.12 | 16 | Endothelial |
| Cxx1a         | 0.49 | 0.00 | 0.00 | 0.44 | 0.22 | 16 | Endothelial |
| Pea15a        | 0.49 | 0.00 | 0.00 | 0.33 | 0.14 | 16 | Endothelial |
| Plec          | 0.48 | 0.00 | 0.00 | 0.30 | 0.12 | 16 | Endothelial |
| Tspan18       | 0.38 | 0.00 | 0.00 | 0.33 | 0.13 | 16 | Endothelial |
| Nck1          | 0.46 | 0.00 | 0.00 | 0.31 | 0.13 | 16 | Endothelial |
| Emp1          | 0.42 | 0.00 | 0.00 | 0.45 | 0.22 | 16 | Endothelial |
| Itm2b         | 0.33 | 0.00 | 0.00 | 0.89 | 0.76 | 16 | Endothelial |
| Ifitm2        | 0.47 | 0.00 | 0.00 | 0.55 | 0.32 | 16 | Endothelial |

|          |      |      |      |      |      |    |             |
|----------|------|------|------|------|------|----|-------------|
| Tcf4     | 0.51 | 0.00 | 0.00 | 0.65 | 0.41 | 16 | Endothelial |
| Swap70   | 0.50 | 0.00 | 0.00 | 0.28 | 0.11 | 16 | Endothelial |
| Adam10   | 0.67 | 0.00 | 0.00 | 0.38 | 0.18 | 16 | Endothelial |
| Id2      | 0.47 | 0.00 | 0.00 | 0.57 | 0.33 | 16 | Endothelial |
| Rfk      | 0.52 | 0.00 | 0.00 | 0.25 | 0.10 | 16 | Endothelial |
| Hip1     | 0.46 | 0.00 | 0.00 | 0.35 | 0.16 | 16 | Endothelial |
| Crip2    | 0.39 | 0.00 | 0.00 | 0.68 | 0.41 | 16 | Endothelial |
| Fam115a  | 0.49 | 0.00 | 0.00 | 0.32 | 0.14 | 16 | Endothelial |
| Golm1    | 0.56 | 0.00 | 0.00 | 0.26 | 0.10 | 16 | Endothelial |
| Rdx      | 0.47 | 0.00 | 0.00 | 0.67 | 0.45 | 16 | Endothelial |
| Agrn     | 0.39 | 0.00 | 0.00 | 0.30 | 0.13 | 16 | Endothelial |
| Trib2    | 0.46 | 0.00 | 0.00 | 0.27 | 0.11 | 16 | Endothelial |
| Cxx1b    | 0.45 | 0.00 | 0.00 | 0.43 | 0.22 | 16 | Endothelial |
| Klf2     | 0.51 | 0.00 | 0.00 | 0.40 | 0.20 | 16 | Endothelial |
| Actn4    | 0.50 | 0.00 | 0.00 | 0.50 | 0.29 | 16 | Endothelial |
| Anxa2    | 0.48 | 0.00 | 0.00 | 0.67 | 0.47 | 16 | Endothelial |
| Skap2    | 0.38 | 0.00 | 0.00 | 0.29 | 0.13 | 16 | Endothelial |
| Thbd     | 0.48 | 0.00 | 0.00 | 0.46 | 0.25 | 16 | Endothelial |
| Cnn3     | 0.41 | 0.00 | 0.00 | 0.54 | 0.30 | 16 | Endothelial |
| Sema6a   | 0.33 | 0.00 | 0.00 | 0.28 | 0.12 | 16 | Endothelial |
| Ghr      | 0.44 | 0.00 | 0.00 | 0.32 | 0.15 | 16 | Endothelial |
| Anxa3    | 0.40 | 0.00 | 0.00 | 0.43 | 0.22 | 16 | Endothelial |
| Lima1    | 0.48 | 0.00 | 0.00 | 0.31 | 0.14 | 16 | Endothelial |
| Gimap5   | 0.32 | 0.00 | 0.00 | 0.27 | 0.11 | 16 | Endothelial |
| Atp2b1   | 0.49 | 0.00 | 0.00 | 0.76 | 0.58 | 16 | Endothelial |
| Tmem109  | 0.42 | 0.00 | 0.00 | 0.28 | 0.12 | 16 | Endothelial |
| Marcks   | 0.28 | 0.00 | 0.00 | 0.75 | 0.50 | 16 | Endothelial |
| Rapgef5  | 0.45 | 0.00 | 0.00 | 0.25 | 0.11 | 16 | Endothelial |
| Map7d1   | 0.41 | 0.00 | 0.00 | 0.36 | 0.18 | 16 | Endothelial |
| Nfe2l1   | 0.49 | 0.00 | 0.00 | 0.42 | 0.23 | 16 | Endothelial |
| Cxx1c    | 0.42 | 0.00 | 0.00 | 0.41 | 0.22 | 16 | Endothelial |
| Lphn2    | 0.34 | 0.00 | 0.00 | 0.30 | 0.13 | 16 | Endothelial |
| Hdac7    | 0.40 | 0.00 | 0.00 | 0.30 | 0.14 | 16 | Endothelial |
| Ccdc50   | 0.45 | 0.00 | 0.00 | 0.45 | 0.26 | 16 | Endothelial |
| Lgals9   | 0.37 | 0.00 | 0.00 | 0.30 | 0.14 | 16 | Endothelial |
| Ppap2b   | 0.45 | 0.00 | 0.00 | 0.43 | 0.24 | 16 | Endothelial |
| Arhgap31 | 0.48 | 0.00 | 0.00 | 0.26 | 0.12 | 16 | Endothelial |
| Mmp2     | 0.39 | 0.00 | 0.00 | 0.29 | 0.13 | 16 | Endothelial |
| Golim4   | 0.45 | 0.00 | 0.00 | 0.38 | 0.20 | 16 | Endothelial |
| Rabgap1  | 0.45 | 0.00 | 0.00 | 0.28 | 0.13 | 16 | Endothelial |
| Tmod3    | 0.47 | 0.00 | 0.00 | 0.45 | 0.26 | 16 | Endothelial |
| Fli1     | 0.38 | 0.00 | 0.00 | 0.27 | 0.12 | 16 | Endothelial |
| Tsc22d1  | 0.51 | 0.00 | 0.00 | 0.53 | 0.33 | 16 | Endothelial |

|          |      |      |      |      |      |    |             |
|----------|------|------|------|------|------|----|-------------|
| Sox4     | 0.50 | 0.00 | 0.00 | 0.57 | 0.36 | 16 | Endothelial |
| Ehd1     | 0.38 | 0.00 | 0.00 | 0.26 | 0.12 | 16 | Endothelial |
| Itga6    | 0.40 | 0.00 | 0.00 | 0.29 | 0.13 | 16 | Endothelial |
| Pdlim1   | 0.39 | 0.00 | 0.00 | 0.30 | 0.14 | 16 | Endothelial |
| Rhoc     | 0.39 | 0.00 | 0.00 | 0.39 | 0.21 | 16 | Endothelial |
| Sat1     | 0.63 | 0.00 | 0.00 | 0.52 | 0.33 | 16 | Endothelial |
| Ttc28    | 0.38 | 0.00 | 0.00 | 0.27 | 0.12 | 16 | Endothelial |
| Ppfibp1  | 0.39 | 0.00 | 0.00 | 0.30 | 0.14 | 16 | Endothelial |
| Tead2    | 0.37 | 0.00 | 0.00 | 0.27 | 0.12 | 16 | Endothelial |
| Gbp7     | 0.38 | 0.00 | 0.00 | 0.29 | 0.14 | 16 | Endothelial |
| Alas1    | 0.43 | 0.00 | 0.00 | 0.26 | 0.12 | 16 | Endothelial |
| Kank3    | 0.36 | 0.00 | 0.00 | 0.30 | 0.14 | 16 | Endothelial |
| Ddah2    | 0.32 | 0.00 | 0.00 | 0.46 | 0.26 | 16 | Endothelial |
| Spag9    | 0.43 | 0.00 | 0.00 | 0.33 | 0.17 | 16 | Endothelial |
| Tmem100  | 0.32 | 0.00 | 0.00 | 0.51 | 0.30 | 16 | Endothelial |
| Gm7676   | 0.28 | 0.00 | 0.00 | 0.36 | 0.19 | 16 | Endothelial |
| Cdc42ep3 | 0.49 | 0.00 | 0.00 | 0.29 | 0.14 | 16 | Endothelial |
| Ppic     | 0.38 | 0.00 | 0.00 | 0.58 | 0.38 | 16 | Endothelial |
| Ybx3     | 0.40 | 0.00 | 0.00 | 0.36 | 0.19 | 16 | Endothelial |
| Ccdc85b  | 0.35 | 0.00 | 0.00 | 0.25 | 0.12 | 16 | Endothelial |
| Klhl5    | 0.40 | 0.00 | 0.00 | 0.29 | 0.14 | 16 | Endothelial |
| Itm2c    | 0.41 | 0.00 | 0.00 | 0.39 | 0.22 | 16 | Endothelial |
| Uaca     | 0.39 | 0.00 | 0.00 | 0.28 | 0.14 | 16 | Endothelial |
| Adamts1  | 0.36 | 0.00 | 0.00 | 0.39 | 0.21 | 16 | Endothelial |
| Casz1    | 0.39 | 0.00 | 0.00 | 0.28 | 0.14 | 16 | Endothelial |
| Pam      | 0.34 | 0.00 | 0.00 | 0.33 | 0.17 | 16 | Endothelial |
| Vim      | 0.25 | 0.00 | 0.00 | 0.86 | 0.66 | 16 | Endothelial |
| Gcc2     | 0.47 | 0.00 | 0.00 | 0.42 | 0.25 | 16 | Endothelial |
| Mgp      | 0.59 | 0.00 | 0.00 | 0.50 | 0.31 | 16 | Endothelial |
| Bst2     | 0.32 | 0.00 | 0.00 | 0.28 | 0.14 | 16 | Endothelial |
| Msn      | 0.34 | 0.00 | 0.00 | 0.62 | 0.43 | 16 | Endothelial |
| Tubb5    | 0.33 | 0.00 | 0.00 | 0.64 | 0.44 | 16 | Endothelial |
| Ctnna1   | 0.37 | 0.00 | 0.00 | 0.55 | 0.36 | 16 | Endothelial |
| Mapk3    | 0.35 | 0.00 | 0.00 | 0.27 | 0.14 | 16 | Endothelial |
| Pdia3    | 0.39 | 0.00 | 0.00 | 0.62 | 0.44 | 16 | Endothelial |
| Amotl1   | 0.30 | 0.00 | 0.00 | 0.30 | 0.16 | 16 | Endothelial |
| Sptbn1   | 0.32 | 0.00 | 0.00 | 0.72 | 0.54 | 16 | Endothelial |
| Laptm4a  | 0.35 | 0.00 | 0.00 | 0.67 | 0.52 | 16 | Endothelial |
| Ttc3     | 0.40 | 0.00 | 0.00 | 0.46 | 0.29 | 16 | Endothelial |
| Marcksl1 | 0.39 | 0.00 | 0.00 | 0.35 | 0.19 | 16 | Endothelial |
| Arhgef2  | 0.33 | 0.00 | 0.00 | 0.36 | 0.20 | 16 | Endothelial |
| Nfic     | 0.37 | 0.00 | 0.00 | 0.41 | 0.24 | 16 | Endothelial |
| F11r     | 0.37 | 0.00 | 0.00 | 0.31 | 0.16 | 16 | Endothelial |

|               |      |      |      |      |      |    |             |
|---------------|------|------|------|------|------|----|-------------|
| Ralb          | 0.34 | 0.00 | 0.00 | 0.34 | 0.19 | 16 | Endothelial |
| Cd81          | 0.30 | 0.00 | 0.00 | 0.59 | 0.40 | 16 | Endothelial |
| App           | 0.25 | 0.00 | 0.00 | 0.77 | 0.59 | 16 | Endothelial |
| Dnaja1        | 0.37 | 0.00 | 0.00 | 0.67 | 0.51 | 16 | Endothelial |
| G3bp2         | 0.45 | 0.00 | 0.00 | 0.48 | 0.31 | 16 | Endothelial |
| Zmiz1         | 0.41 | 0.00 | 0.00 | 0.37 | 0.22 | 16 | Endothelial |
| Fbn1          | 0.34 | 0.00 | 0.00 | 0.32 | 0.17 | 16 | Endothelial |
| Sept2         | 0.33 | 0.00 | 0.00 | 0.53 | 0.35 | 16 | Endothelial |
| H2-T23        | 0.32 | 0.00 | 0.00 | 0.25 | 0.13 | 16 | Endothelial |
| Sypl          | 0.37 | 0.00 | 0.00 | 0.42 | 0.26 | 16 | Endothelial |
| Cd97          | 0.33 | 0.00 | 0.00 | 0.33 | 0.18 | 16 | Endothelial |
| Bnip2         | 0.36 | 0.00 | 0.00 | 0.47 | 0.30 | 16 | Endothelial |
| Serpinb6a     | 0.35 | 0.00 | 0.00 | 0.32 | 0.18 | 16 | Endothelial |
| Phactr2       | 0.33 | 0.00 | 0.00 | 0.25 | 0.13 | 16 | Endothelial |
| Tenc1         | 0.32 | 0.00 | 0.00 | 0.27 | 0.14 | 16 | Endothelial |
| Ano6          | 0.38 | 0.00 | 0.00 | 0.31 | 0.18 | 16 | Endothelial |
| Calu          | 0.31 | 0.00 | 0.00 | 0.40 | 0.24 | 16 | Endothelial |
| Arhgap29      | 0.31 | 0.00 | 0.00 | 0.37 | 0.22 | 16 | Endothelial |
| Ktn1          | 0.33 | 0.00 | 0.00 | 0.54 | 0.38 | 16 | Endothelial |
| Fabp5         | 0.27 | 0.00 | 0.00 | 0.25 | 0.13 | 16 | Endothelial |
| Clic1         | 0.27 | 0.00 | 0.00 | 0.54 | 0.38 | 16 | Endothelial |
| Cpd           | 0.33 | 0.00 | 0.00 | 0.27 | 0.14 | 16 | Endothelial |
| Smarca2       | 0.36 | 0.00 | 0.00 | 0.50 | 0.34 | 16 | Endothelial |
| Pbx1          | 0.35 | 0.00 | 0.00 | 0.34 | 0.20 | 16 | Endothelial |
| Atp1b3        | 0.33 | 0.00 | 0.00 | 0.41 | 0.25 | 16 | Endothelial |
| Cnih1         | 0.31 | 0.00 | 0.00 | 0.32 | 0.19 | 16 | Endothelial |
| Arglu1        | 0.33 | 0.00 | 0.00 | 0.58 | 0.42 | 16 | Endothelial |
| Zbtb20        | 0.43 | 0.00 | 0.00 | 0.41 | 0.27 | 16 | Endothelial |
| Pltp          | 0.35 | 0.00 | 0.00 | 0.31 | 0.18 | 16 | Endothelial |
| Clic4         | 0.32 | 0.00 | 0.00 | 0.45 | 0.29 | 16 | Endothelial |
| Xiap          | 0.34 | 0.00 | 0.00 | 0.34 | 0.20 | 16 | Endothelial |
| S100a10       | 0.35 | 0.00 | 0.00 | 0.53 | 0.38 | 16 | Endothelial |
| Tjp1          | 0.31 | 0.00 | 0.00 | 0.29 | 0.16 | 16 | Endothelial |
| Capns1        | 0.34 | 0.00 | 0.00 | 0.39 | 0.24 | 16 | Endothelial |
| Ccser2        | 0.30 | 0.00 | 0.00 | 0.26 | 0.14 | 16 | Endothelial |
| Mest          | 0.28 | 0.00 | 0.00 | 0.34 | 0.20 | 16 | Endothelial |
| Emp3          | 0.26 | 0.00 | 0.00 | 0.36 | 0.21 | 16 | Endothelial |
| Cdc42bpa      | 0.45 | 0.00 | 0.00 | 0.26 | 0.15 | 16 | Endothelial |
| Rac1          | 0.29 | 0.00 | 0.00 | 0.45 | 0.30 | 16 | Endothelial |
| Snx3          | 0.32 | 0.00 | 0.00 | 0.48 | 0.33 | 16 | Endothelial |
| Cyb5r3        | 0.30 | 0.00 | 0.00 | 0.54 | 0.39 | 16 | Endothelial |
| 2700089E24Rik | 0.28 | 0.00 | 0.00 | 0.37 | 0.23 | 16 | Endothelial |
| Nr2f2         | 0.32 | 0.00 | 0.00 | 0.34 | 0.21 | 16 | Endothelial |

|               |      |      |      |      |      |    |               |
|---------------|------|------|------|------|------|----|---------------|
| Ndufa8        | 0.32 | 0.00 | 0.00 | 0.38 | 0.25 | 16 | Endothelial   |
| Ppp1r12a      | 0.37 | 0.00 | 0.00 | 0.38 | 0.25 | 16 | Endothelial   |
| Gnai2         | 0.27 | 0.00 | 0.00 | 0.55 | 0.38 | 16 | Endothelial   |
| S100a13       | 0.29 | 0.00 | 0.00 | 0.39 | 0.25 | 16 | Endothelial   |
| Srpr          | 0.29 | 0.00 | 0.00 | 0.37 | 0.24 | 16 | Endothelial   |
| Sept11        | 0.26 | 0.00 | 0.00 | 0.36 | 0.22 | 16 | Endothelial   |
| Cflar         | 0.26 | 0.00 | 0.00 | 0.31 | 0.19 | 16 | Endothelial   |
| Gm26735       | 0.30 | 0.00 | 0.00 | 0.31 | 0.19 | 16 | Endothelial   |
| Nras          | 0.27 | 0.00 | 0.00 | 0.28 | 0.16 | 16 | Endothelial   |
| Sptlc2        | 0.25 | 0.00 | 0.00 | 0.26 | 0.15 | 16 | Endothelial   |
| Zc3h7a        | 0.29 | 0.00 | 0.00 | 0.42 | 0.29 | 16 | Endothelial   |
| MLlt4         | 0.28 | 0.00 | 0.00 | 0.33 | 0.21 | 16 | Endothelial   |
| Rbm28         | 0.28 | 0.00 | 0.00 | 0.32 | 0.19 | 16 | Endothelial   |
| Ctnnb1        | 0.29 | 0.00 | 0.00 | 0.48 | 0.34 | 16 | Endothelial   |
| Amd1          | 0.67 | 0.00 | 0.00 | 0.29 | 0.18 | 16 | Endothelial   |
| Tnfaip1       | 0.33 | 0.00 | 0.00 | 0.27 | 0.16 | 16 | Endothelial   |
| Plcg1         | 0.26 | 0.00 | 0.00 | 0.27 | 0.16 | 16 | Endothelial   |
| Iqgap1        | 0.29 | 0.00 | 0.00 | 0.59 | 0.45 | 16 | Endothelial   |
| Chd3          | 0.33 | 0.00 | 0.00 | 0.29 | 0.18 | 16 | Endothelial   |
| Calr          | 0.32 | 0.00 | 0.00 | 0.56 | 0.43 | 16 | Endothelial   |
| 1700020I14Rik | 0.27 | 0.00 | 0.00 | 0.34 | 0.23 | 16 | Endothelial   |
| Leprot        | 0.28 | 0.00 | 0.00 | 0.46 | 0.33 | 16 | Endothelial   |
| Sh3glb1       | 0.26 | 0.00 | 0.00 | 0.54 | 0.40 | 16 | Endothelial   |
| Akr1a1        | 0.25 | 0.00 | 0.00 | 0.61 | 0.49 | 16 | Endothelial   |
| Hes1          | 0.33 | 0.00 | 0.00 | 0.42 | 0.29 | 16 | Endothelial   |
| Xist          | 0.26 | 0.00 | 0.00 | 0.64 | 0.51 | 16 | Endothelial   |
| Tmem59        | 0.26 | 0.00 | 0.00 | 0.53 | 0.40 | 16 | Endothelial   |
| Thoc2         | 0.31 | 0.00 | 0.00 | 0.45 | 0.33 | 16 | Endothelial   |
| Atrx          | 0.26 | 0.00 | 0.00 | 0.75 | 0.66 | 16 | Endothelial   |
| Tmem30a       | 0.26 | 0.00 | 0.00 | 0.40 | 0.28 | 16 | Endothelial   |
| Atp6v0e       | 0.25 | 0.00 | 0.00 | 0.31 | 0.20 | 16 | Endothelial   |
| Pcmt1         | 0.25 | 0.00 | 0.00 | 0.26 | 0.16 | 16 | Endothelial   |
| Zrsr2         | 0.27 | 0.00 | 0.00 | 0.25 | 0.16 | 16 | Endothelial   |
| Ddx3x         | 0.31 | 0.00 | 0.00 | 0.41 | 0.30 | 16 | Endothelial   |
| Amd2          | 0.65 | 0.00 | 0.00 | 0.27 | 0.18 | 16 | Endothelial   |
| Ginm1         | 0.27 | 0.00 | 0.00 | 0.33 | 0.23 | 16 | Endothelial   |
| Trip11        | 0.27 | 0.00 | 0.00 | 0.31 | 0.22 | 16 | Endothelial   |
| Tia1          | 0.26 | 0.00 | 0.00 | 0.31 | 0.22 | 16 | Endothelial   |
| Bsg           | 0.33 | 0.00 | 0.00 | 0.45 | 0.36 | 16 | Endothelial   |
| Sec14l3       | 3.43 | 0.00 | 0.00 | 0.99 | 0.10 | 17 | Ciliated Cell |
| Dynlrb2       | 3.08 | 0.00 | 0.00 | 0.94 | 0.01 | 17 | Ciliated Cell |
| AU040972      | 2.72 | 0.00 | 0.00 | 0.69 | 0.00 | 17 | Ciliated Cell |
| Ccdc153       | 2.70 | 0.00 | 0.00 | 0.82 | 0.00 | 17 | Ciliated Cell |

|               |      |      |      |      |      |    |               |
|---------------|------|------|------|------|------|----|---------------|
| Cbr2          | 2.62 | 0.00 | 0.00 | 0.98 | 0.15 | 17 | Ciliated Cell |
| Tppp3         | 2.62 | 0.00 | 0.00 | 0.94 | 0.11 | 17 | Ciliated Cell |
| Aldh1a1       | 2.50 | 0.00 | 0.00 | 0.88 | 0.03 | 17 | Ciliated Cell |
| Cdkn1c        | 2.47 | 0.00 | 0.00 | 0.85 | 0.17 | 17 | Ciliated Cell |
| Ccdc39        | 2.39 | 0.00 | 0.00 | 0.83 | 0.02 | 17 | Ciliated Cell |
| Fhad1         | 2.38 | 0.00 | 0.00 | 0.81 | 0.01 | 17 | Ciliated Cell |
| Tmem212       | 2.34 | 0.00 | 0.00 | 0.80 | 0.00 | 17 | Ciliated Cell |
| 1700009P17Rik | 2.26 | 0.00 | 0.00 | 0.83 | 0.01 | 17 | Ciliated Cell |
| Fam161a       | 2.24 | 0.00 | 0.00 | 0.79 | 0.01 | 17 | Ciliated Cell |
| Rsph1         | 2.24 | 0.00 | 0.00 | 0.77 | 0.00 | 17 | Ciliated Cell |
| 1700016K19Rik | 2.23 | 0.00 | 0.00 | 0.80 | 0.00 | 17 | Ciliated Cell |
| Spag17        | 2.22 | 0.00 | 0.00 | 0.81 | 0.00 | 17 | Ciliated Cell |
| Wdr66         | 2.21 | 0.00 | 0.00 | 0.79 | 0.01 | 17 | Ciliated Cell |
| Ccdc113       | 2.19 | 0.00 | 0.00 | 0.80 | 0.00 | 17 | Ciliated Cell |
| Spef2         | 2.19 | 0.00 | 0.00 | 0.75 | 0.01 | 17 | Ciliated Cell |
| Mt1           | 2.17 | 0.00 | 0.00 | 0.84 | 0.15 | 17 | Ciliated Cell |
| Chchd10       | 2.17 | 0.00 | 0.00 | 0.90 | 0.12 | 17 | Ciliated Cell |
| Fam183b       | 2.16 | 0.00 | 0.00 | 0.77 | 0.00 | 17 | Ciliated Cell |
| Cyp2s1        | 2.16 | 0.00 | 0.00 | 0.79 | 0.01 | 17 | Ciliated Cell |
| Cd24a         | 2.13 | 0.00 | 0.00 | 0.89 | 0.12 | 17 | Ciliated Cell |
| Foxj1         | 2.11 | 0.00 | 0.00 | 0.75 | 0.00 | 17 | Ciliated Cell |
| Hspa4l        | 2.10 | 0.00 | 0.00 | 0.81 | 0.05 | 17 | Ciliated Cell |
| Wdr52         | 2.09 | 0.00 | 0.00 | 0.78 | 0.00 | 17 | Ciliated Cell |
| Ccdc181       | 2.08 | 0.00 | 0.00 | 0.75 | 0.02 | 17 | Ciliated Cell |
| Wdr96         | 2.06 | 0.00 | 0.00 | 0.71 | 0.00 | 17 | Ciliated Cell |
| Ccdc19        | 2.05 | 0.00 | 0.00 | 0.74 | 0.01 | 17 | Ciliated Cell |
| Tubb4b        | 2.04 | 0.00 | 0.00 | 0.88 | 0.18 | 17 | Ciliated Cell |
| Enkur         | 2.02 | 0.00 | 0.00 | 0.78 | 0.01 | 17 | Ciliated Cell |
| Traf3ip1      | 2.01 | 0.00 | 0.00 | 0.78 | 0.03 | 17 | Ciliated Cell |
| Spa17         | 2.01 | 0.00 | 0.00 | 0.75 | 0.02 | 17 | Ciliated Cell |
| Ccdc146       | 2.00 | 0.00 | 0.00 | 0.70 | 0.00 | 17 | Ciliated Cell |
| Mlf1          | 1.97 | 0.00 | 0.00 | 0.75 | 0.01 | 17 | Ciliated Cell |
| Cyp2f2        | 1.96 | 0.00 | 0.00 | 0.58 | 0.02 | 17 | Ciliated Cell |
| Lrriq1        | 1.94 | 0.00 | 0.00 | 0.68 | 0.00 | 17 | Ciliated Cell |
| Ccdc11        | 1.92 | 0.00 | 0.00 | 0.66 | 0.00 | 17 | Ciliated Cell |
| Sntn          | 1.91 | 0.00 | 0.00 | 0.58 | 0.00 | 17 | Ciliated Cell |
| lqcg          | 1.90 | 0.00 | 0.00 | 0.71 | 0.01 | 17 | Ciliated Cell |
| Hsp90aa1      | 1.89 | 0.00 | 0.00 | 0.96 | 0.47 | 17 | Ciliated Cell |
| Elof1         | 1.87 | 0.00 | 0.00 | 0.82 | 0.10 | 17 | Ciliated Cell |
| 1110017D15Rik | 1.86 | 0.00 | 0.00 | 0.70 | 0.00 | 17 | Ciliated Cell |
| Anxa1         | 1.85 | 0.00 | 0.00 | 0.87 | 0.18 | 17 | Ciliated Cell |
| Riad1         | 1.84 | 0.00 | 0.00 | 0.68 | 0.01 | 17 | Ciliated Cell |
| 3300002A11Rik | 1.84 | 0.00 | 0.00 | 0.64 | 0.00 | 17 | Ciliated Cell |

|               |      |      |      |      |      |    |               |
|---------------|------|------|------|------|------|----|---------------|
| BC051019      | 1.83 | 0.00 | 0.00 | 0.70 | 0.00 | 17 | Ciliated Cell |
| 1110004E09Rik | 1.83 | 0.00 | 0.00 | 0.77 | 0.07 | 17 | Ciliated Cell |
| Tcea3         | 1.81 | 0.00 | 0.00 | 0.77 | 0.06 | 17 | Ciliated Cell |
| Mt2           | 1.81 | 0.00 | 0.00 | 0.59 | 0.06 | 17 | Ciliated Cell |
| Dnah12        | 1.79 | 0.00 | 0.00 | 0.65 | 0.00 | 17 | Ciliated Cell |
| Ak7           | 1.77 | 0.00 | 0.00 | 0.67 | 0.00 | 17 | Ciliated Cell |
| Erich2        | 1.76 | 0.00 | 0.00 | 0.67 | 0.01 | 17 | Ciliated Cell |
| Nme5          | 1.76 | 0.00 | 0.00 | 0.68 | 0.00 | 17 | Ciliated Cell |
| Drc1          | 1.75 | 0.00 | 0.00 | 0.62 | 0.00 | 17 | Ciliated Cell |
| Igfbp5        | 1.75 | 0.00 | 0.00 | 0.87 | 0.09 | 17 | Ciliated Cell |
| 1600029I14Rik | 1.75 | 0.00 | 0.00 | 0.64 | 0.00 | 17 | Ciliated Cell |
| Wfdc2         | 1.75 | 0.00 | 0.00 | 0.91 | 0.15 | 17 | Ciliated Cell |
| Ezr           | 1.74 | 0.00 | 0.00 | 0.90 | 0.21 | 17 | Ciliated Cell |
| Ccdc17        | 1.73 | 0.00 | 0.00 | 0.63 | 0.01 | 17 | Ciliated Cell |
| Krt8          | 1.71 | 0.00 | 0.00 | 0.73 | 0.07 | 17 | Ciliated Cell |
| Lrrc23        | 1.71 | 0.00 | 0.00 | 0.60 | 0.00 | 17 | Ciliated Cell |
| Tspan1        | 1.70 | 0.00 | 0.00 | 0.68 | 0.03 | 17 | Ciliated Cell |
| AK129341      | 1.69 | 0.00 | 0.00 | 0.66 | 0.01 | 17 | Ciliated Cell |
| Calml4        | 1.68 | 0.00 | 0.00 | 0.61 | 0.02 | 17 | Ciliated Cell |
| Cldn3         | 1.67 | 0.00 | 0.00 | 0.82 | 0.11 | 17 | Ciliated Cell |
| Hp            | 1.65 | 0.00 | 0.00 | 0.68 | 0.10 | 17 | Ciliated Cell |
| Wdr60         | 1.65 | 0.00 | 0.00 | 0.73 | 0.07 | 17 | Ciliated Cell |
| Rsph4a        | 1.62 | 0.00 | 0.00 | 0.61 | 0.00 | 17 | Ciliated Cell |
| 1700007K13Rik | 1.62 | 0.00 | 0.00 | 0.62 | 0.00 | 17 | Ciliated Cell |
| Tmem107       | 1.62 | 0.00 | 0.00 | 0.66 | 0.03 | 17 | Ciliated Cell |
| Ccdc41        | 1.61 | 0.00 | 0.00 | 0.81 | 0.16 | 17 | Ciliated Cell |
| Hspa2         | 1.60 | 0.00 | 0.00 | 0.61 | 0.01 | 17 | Ciliated Cell |
| Meig1         | 1.59 | 0.00 | 0.00 | 0.60 | 0.00 | 17 | Ciliated Cell |
| Cep290        | 1.59 | 0.00 | 0.00 | 0.72 | 0.08 | 17 | Ciliated Cell |
| 2610028H24Rik | 1.58 | 0.00 | 0.00 | 0.62 | 0.01 | 17 | Ciliated Cell |
| Ces1d         | 1.58 | 0.00 | 0.00 | 0.83 | 0.16 | 17 | Ciliated Cell |
| E230008N13Rik | 1.57 | 0.00 | 0.00 | 0.59 | 0.01 | 17 | Ciliated Cell |
| Lrrc48        | 1.57 | 0.00 | 0.00 | 0.62 | 0.00 | 17 | Ciliated Cell |
| Ift74         | 1.55 | 0.00 | 0.00 | 0.71 | 0.09 | 17 | Ciliated Cell |
| Ccdc176       | 1.54 | 0.00 | 0.00 | 0.59 | 0.01 | 17 | Ciliated Cell |
| Osbp16        | 1.54 | 0.00 | 0.00 | 0.67 | 0.04 | 17 | Ciliated Cell |
| Nek5          | 1.54 | 0.00 | 0.00 | 0.59 | 0.00 | 17 | Ciliated Cell |
| Dnah5         | 1.52 | 0.00 | 0.00 | 0.55 | 0.00 | 17 | Ciliated Cell |
| 1700094D03Rik | 1.52 | 0.00 | 0.00 | 0.55 | 0.02 | 17 | Ciliated Cell |
| Lrrc71        | 1.52 | 0.00 | 0.00 | 0.56 | 0.00 | 17 | Ciliated Cell |
| Efcab10       | 1.52 | 0.00 | 0.00 | 0.57 | 0.00 | 17 | Ciliated Cell |
| Mns1          | 1.51 | 0.00 | 0.00 | 0.61 | 0.03 | 17 | Ciliated Cell |
| Aldh3b1       | 1.51 | 0.00 | 0.00 | 0.58 | 0.02 | 17 | Ciliated Cell |

|               |      |      |      |      |      |    |               |
|---------------|------|------|------|------|------|----|---------------|
| Lrrc6         | 1.50 | 0.00 | 0.00 | 0.58 | 0.00 | 17 | Ciliated Cell |
| Ak9           | 1.50 | 0.00 | 0.00 | 0.55 | 0.00 | 17 | Ciliated Cell |
| Akap14        | 1.49 | 0.00 | 0.00 | 0.54 | 0.00 | 17 | Ciliated Cell |
| Ccdc78        | 1.49 | 0.00 | 0.00 | 0.54 | 0.00 | 17 | Ciliated Cell |
| Lrrc51        | 1.49 | 0.00 | 0.00 | 0.57 | 0.01 | 17 | Ciliated Cell |
| Ccdc104       | 1.48 | 0.00 | 0.00 | 0.76 | 0.17 | 17 | Ciliated Cell |
| Fam213a       | 1.48 | 0.00 | 0.00 | 0.65 | 0.07 | 17 | Ciliated Cell |
| Mettl7a1      | 1.48 | 0.00 | 0.00 | 0.84 | 0.21 | 17 | Ciliated Cell |
| Kif21a        | 1.48 | 0.00 | 0.00 | 0.59 | 0.05 | 17 | Ciliated Cell |
| 1700003M02Rik | 1.46 | 0.00 | 0.00 | 0.57 | 0.00 | 17 | Ciliated Cell |
| Tekt1         | 1.46 | 0.00 | 0.00 | 0.58 | 0.00 | 17 | Ciliated Cell |
| Rsph9         | 1.46 | 0.00 | 0.00 | 0.61 | 0.01 | 17 | Ciliated Cell |
| Cldn7         | 1.45 | 0.00 | 0.00 | 0.68 | 0.07 | 17 | Ciliated Cell |
| Gm973         | 1.45 | 0.00 | 0.00 | 0.53 | 0.00 | 17 | Ciliated Cell |
| Tubb4b-ps1    | 1.41 | 0.00 | 0.00 | 0.65 | 0.08 | 17 | Ciliated Cell |
| Smim22        | 1.41 | 0.00 | 0.00 | 0.60 | 0.03 | 17 | Ciliated Cell |
| A330021E22Rik | 1.41 | 0.00 | 0.00 | 0.58 | 0.01 | 17 | Ciliated Cell |
| Hdc           | 1.41 | 0.00 | 0.00 | 0.62 | 0.03 | 17 | Ciliated Cell |
| Bphl          | 1.40 | 0.00 | 0.00 | 0.62 | 0.04 | 17 | Ciliated Cell |
| Tctex1d4      | 1.40 | 0.00 | 0.00 | 0.54 | 0.00 | 17 | Ciliated Cell |
| Dcxr          | 1.39 | 0.00 | 0.00 | 0.69 | 0.10 | 17 | Ciliated Cell |
| Nudc          | 1.39 | 0.00 | 0.00 | 0.78 | 0.20 | 17 | Ciliated Cell |
| Odf3b         | 1.38 | 0.00 | 0.00 | 0.54 | 0.00 | 17 | Ciliated Cell |
| Ppp1r36       | 1.37 | 0.00 | 0.00 | 0.52 | 0.00 | 17 | Ciliated Cell |
| Ift81         | 1.37 | 0.00 | 0.00 | 0.63 | 0.06 | 17 | Ciliated Cell |
| Ccdc37        | 1.36 | 0.00 | 0.00 | 0.50 | 0.00 | 17 | Ciliated Cell |
| Ttc25         | 1.36 | 0.00 | 0.00 | 0.52 | 0.00 | 17 | Ciliated Cell |
| Stk33         | 1.35 | 0.00 | 0.00 | 0.51 | 0.00 | 17 | Ciliated Cell |
| Ift88         | 1.35 | 0.00 | 0.00 | 0.59 | 0.04 | 17 | Ciliated Cell |
| Ascc1         | 1.34 | 0.00 | 0.00 | 0.60 | 0.04 | 17 | Ciliated Cell |
| Fam154b       | 1.34 | 0.00 | 0.00 | 0.53 | 0.00 | 17 | Ciliated Cell |
| Myb           | 1.34 | 0.00 | 0.00 | 0.51 | 0.01 | 17 | Ciliated Cell |
| Ccdc30        | 1.33 | 0.00 | 0.00 | 0.53 | 0.00 | 17 | Ciliated Cell |
| Cetn2         | 1.33 | 0.00 | 0.00 | 0.74 | 0.18 | 17 | Ciliated Cell |
| Fam216b       | 1.32 | 0.00 | 0.00 | 0.40 | 0.00 | 17 | Ciliated Cell |
| Dnah6         | 1.32 | 0.00 | 0.00 | 0.47 | 0.00 | 17 | Ciliated Cell |
| Mycbp         | 1.32 | 0.00 | 0.00 | 0.69 | 0.11 | 17 | Ciliated Cell |
| Wdr78         | 1.32 | 0.00 | 0.00 | 0.52 | 0.01 | 17 | Ciliated Cell |
| Strbp         | 1.31 | 0.00 | 0.00 | 0.67 | 0.11 | 17 | Ciliated Cell |
| Smim5         | 1.31 | 0.00 | 0.00 | 0.53 | 0.01 | 17 | Ciliated Cell |
| Calm1         | 1.31 | 0.00 | 0.00 | 1.00 | 0.86 | 17 | Ciliated Cell |
| Gsta4         | 1.31 | 0.00 | 0.00 | 0.55 | 0.03 | 17 | Ciliated Cell |
| Efcab1        | 1.30 | 0.00 | 0.00 | 0.51 | 0.00 | 17 | Ciliated Cell |

|               |      |      |      |      |      |    |               |
|---------------|------|------|------|------|------|----|---------------|
| Fank1         | 1.30 | 0.00 | 0.00 | 0.50 | 0.00 | 17 | Ciliated Cell |
| Cdh1          | 1.29 | 0.00 | 0.00 | 0.61 | 0.07 | 17 | Ciliated Cell |
| Tm4sf1        | 1.29 | 0.00 | 0.00 | 0.87 | 0.20 | 17 | Ciliated Cell |
| Zc2hc1a       | 1.29 | 0.00 | 0.00 | 0.59 | 0.05 | 17 | Ciliated Cell |
| Ccdc108       | 1.28 | 0.00 | 0.00 | 0.48 | 0.00 | 17 | Ciliated Cell |
| Dnali1        | 1.27 | 0.00 | 0.00 | 0.49 | 0.00 | 17 | Ciliated Cell |
| Capsl         | 1.26 | 0.00 | 0.00 | 0.49 | 0.00 | 17 | Ciliated Cell |
| 2610015P09Rik | 1.26 | 0.00 | 0.00 | 0.55 | 0.04 | 17 | Ciliated Cell |
| Dpcd          | 1.25 | 0.00 | 0.00 | 0.60 | 0.06 | 17 | Ciliated Cell |
| 1700024G13Rik | 1.25 | 0.00 | 0.00 | 0.39 | 0.00 | 17 | Ciliated Cell |
| 1700088E04Rik | 1.25 | 0.00 | 0.00 | 0.53 | 0.01 | 17 | Ciliated Cell |
| Cxcl17        | 1.25 | 0.00 | 0.00 | 0.39 | 0.01 | 17 | Ciliated Cell |
| Gpx8          | 1.25 | 0.00 | 0.00 | 0.67 | 0.13 | 17 | Ciliated Cell |
| Anxa8         | 1.24 | 0.00 | 0.00 | 0.46 | 0.01 | 17 | Ciliated Cell |
| Mcee          | 1.24 | 0.00 | 0.00 | 0.62 | 0.08 | 17 | Ciliated Cell |
| Krt18         | 1.23 | 0.00 | 0.00 | 0.60 | 0.07 | 17 | Ciliated Cell |
| Ttll6         | 1.23 | 0.00 | 0.00 | 0.48 | 0.00 | 17 | Ciliated Cell |
| Il18r1        | 1.23 | 0.00 | 0.00 | 0.58 | 0.06 | 17 | Ciliated Cell |
| Cdkl2         | 1.23 | 0.00 | 0.00 | 0.49 | 0.02 | 17 | Ciliated Cell |
| 1110032A03Rik | 1.23 | 0.00 | 0.00 | 0.57 | 0.06 | 17 | Ciliated Cell |
| Kif27         | 1.23 | 0.00 | 0.00 | 0.48 | 0.00 | 17 | Ciliated Cell |
| Pifo          | 1.22 | 0.00 | 0.00 | 0.48 | 0.00 | 17 | Ciliated Cell |
| Spint2        | 1.22 | 0.00 | 0.00 | 0.68 | 0.10 | 17 | Ciliated Cell |
| Ppil6         | 1.21 | 0.00 | 0.00 | 0.49 | 0.00 | 17 | Ciliated Cell |
| Cd55          | 1.20 | 0.00 | 0.00 | 0.60 | 0.07 | 17 | Ciliated Cell |
| Nphp1         | 1.19 | 0.00 | 0.00 | 0.54 | 0.05 | 17 | Ciliated Cell |
| 1700026D08Rik | 1.19 | 0.00 | 0.00 | 0.47 | 0.00 | 17 | Ciliated Cell |
| Spag6         | 1.19 | 0.00 | 0.00 | 0.47 | 0.00 | 17 | Ciliated Cell |
| Chchd6        | 1.18 | 0.00 | 0.00 | 0.51 | 0.03 | 17 | Ciliated Cell |
| Cspp1         | 1.18 | 0.00 | 0.00 | 0.69 | 0.15 | 17 | Ciliated Cell |
| Prr15l        | 1.18 | 0.00 | 0.00 | 0.56 | 0.05 | 17 | Ciliated Cell |
| Pih1d2        | 1.18 | 0.00 | 0.00 | 0.48 | 0.00 | 17 | Ciliated Cell |
| Dnah3         | 1.18 | 0.00 | 0.00 | 0.42 | 0.00 | 17 | Ciliated Cell |
| Lrrc34        | 1.18 | 0.00 | 0.00 | 0.46 | 0.00 | 17 | Ciliated Cell |
| Gipc2         | 1.18 | 0.00 | 0.00 | 0.53 | 0.03 | 17 | Ciliated Cell |
| Mak           | 1.17 | 0.00 | 0.00 | 0.46 | 0.00 | 17 | Ciliated Cell |
| 1700001C02Rik | 1.17 | 0.00 | 0.00 | 0.46 | 0.00 | 17 | Ciliated Cell |
| Dpy30         | 1.17 | 0.00 | 0.00 | 0.64 | 0.13 | 17 | Ciliated Cell |
| 1700026L06Rik | 1.17 | 0.00 | 0.00 | 0.44 | 0.00 | 17 | Ciliated Cell |
| Clic6         | 1.16 | 0.00 | 0.00 | 0.49 | 0.01 | 17 | Ciliated Cell |
| 1600029D21Rik | 1.15 | 0.00 | 0.00 | 0.48 | 0.02 | 17 | Ciliated Cell |
| Rsph10b       | 1.15 | 0.00 | 0.00 | 0.43 | 0.00 | 17 | Ciliated Cell |
| Acsl3         | 1.15 | 0.00 | 0.00 | 0.52 | 0.04 | 17 | Ciliated Cell |

|               |      |      |      |      |      |    |               |
|---------------|------|------|------|------|------|----|---------------|
| Ccdc40        | 1.15 | 0.00 | 0.00 | 0.43 | 0.00 | 17 | Ciliated Cell |
| 1700007G11Rik | 1.15 | 0.00 | 0.00 | 0.45 | 0.00 | 17 | Ciliated Cell |
| Fam216a       | 1.15 | 0.00 | 0.00 | 0.52 | 0.05 | 17 | Ciliated Cell |
| Ccdc114       | 1.14 | 0.00 | 0.00 | 0.45 | 0.01 | 17 | Ciliated Cell |
| Cetn4         | 1.14 | 0.00 | 0.00 | 0.46 | 0.01 | 17 | Ciliated Cell |
| Cdc14a        | 1.14 | 0.00 | 0.00 | 0.46 | 0.03 | 17 | Ciliated Cell |
| Agr3          | 1.14 | 0.00 | 0.00 | 0.43 | 0.00 | 17 | Ciliated Cell |
| Krt19         | 1.14 | 0.00 | 0.00 | 0.56 | 0.06 | 17 | Ciliated Cell |
| Map1b         | 1.14 | 0.00 | 0.00 | 0.60 | 0.09 | 17 | Ciliated Cell |
| Clic3         | 1.13 | 0.00 | 0.00 | 0.58 | 0.08 | 17 | Ciliated Cell |
| Ccdc173       | 1.13 | 0.00 | 0.00 | 0.45 | 0.02 | 17 | Ciliated Cell |
| Cdhr3         | 1.13 | 0.00 | 0.00 | 0.40 | 0.00 | 17 | Ciliated Cell |
| Tekt2         | 1.12 | 0.00 | 0.00 | 0.43 | 0.00 | 17 | Ciliated Cell |
| Ift43         | 1.12 | 0.00 | 0.00 | 0.61 | 0.09 | 17 | Ciliated Cell |
| Map9          | 1.12 | 0.00 | 0.00 | 0.46 | 0.02 | 17 | Ciliated Cell |
| Gm5918        | 1.12 | 0.00 | 0.00 | 0.45 | 0.01 | 17 | Ciliated Cell |
| Adgb          | 1.12 | 0.00 | 0.00 | 0.43 | 0.00 | 17 | Ciliated Cell |
| Rsph3a        | 1.12 | 0.00 | 0.00 | 0.53 | 0.06 | 17 | Ciliated Cell |
| Gm872         | 1.12 | 0.00 | 0.00 | 0.40 | 0.00 | 17 | Ciliated Cell |
| Iqca          | 1.12 | 0.00 | 0.00 | 0.39 | 0.00 | 17 | Ciliated Cell |
| Myh14         | 1.11 | 0.00 | 0.00 | 0.61 | 0.09 | 17 | Ciliated Cell |
| Rfk           | 1.11 | 0.00 | 0.00 | 0.57 | 0.09 | 17 | Ciliated Cell |
| Ttc21a        | 1.10 | 0.00 | 0.00 | 0.42 | 0.00 | 17 | Ciliated Cell |
| Kif3a         | 1.10 | 0.00 | 0.00 | 0.60 | 0.10 | 17 | Ciliated Cell |
| Ttll3         | 1.10 | 0.00 | 0.00 | 0.44 | 0.01 | 17 | Ciliated Cell |
| Net1          | 1.10 | 0.00 | 0.00 | 0.73 | 0.16 | 17 | Ciliated Cell |
| Cystm1        | 1.09 | 0.00 | 0.00 | 0.58 | 0.07 | 17 | Ciliated Cell |
| Stmnd1        | 1.09 | 0.00 | 0.00 | 0.36 | 0.00 | 17 | Ciliated Cell |
| Aldh1a7       | 1.09 | 0.00 | 0.00 | 0.45 | 0.04 | 17 | Ciliated Cell |
| S100a1        | 1.09 | 0.00 | 0.00 | 0.65 | 0.14 | 17 | Ciliated Cell |
| 4833427G06Rik | 1.09 | 0.00 | 0.00 | 0.43 | 0.00 | 17 | Ciliated Cell |
| Areg          | 1.09 | 0.00 | 0.00 | 0.33 | 0.02 | 17 | Ciliated Cell |
| Dmkn          | 1.09 | 0.00 | 0.00 | 0.42 | 0.01 | 17 | Ciliated Cell |
| Fam167a       | 1.09 | 0.00 | 0.00 | 0.41 | 0.01 | 17 | Ciliated Cell |
| Rsph3b        | 1.08 | 0.00 | 0.00 | 0.51 | 0.06 | 17 | Ciliated Cell |
| Lca5          | 1.08 | 0.00 | 0.00 | 0.44 | 0.03 | 17 | Ciliated Cell |
| Epcam         | 1.08 | 0.00 | 0.00 | 0.61 | 0.09 | 17 | Ciliated Cell |
| Gm7094        | 1.07 | 0.00 | 0.00 | 0.42 | 0.01 | 17 | Ciliated Cell |
| Spata18       | 1.07 | 0.00 | 0.00 | 0.39 | 0.00 | 17 | Ciliated Cell |
| Gas8          | 1.06 | 0.00 | 0.00 | 0.49 | 0.03 | 17 | Ciliated Cell |
| Wdr16         | 1.06 | 0.00 | 0.00 | 0.41 | 0.00 | 17 | Ciliated Cell |
| Tmprss2       | 1.06 | 0.00 | 0.00 | 0.45 | 0.02 | 17 | Ciliated Cell |
| Mettl7a2      | 1.06 | 0.00 | 0.00 | 0.58 | 0.10 | 17 | Ciliated Cell |

|               |      |      |      |      |      |    |               |
|---------------|------|------|------|------|------|----|---------------|
| Vwa3a         | 1.06 | 0.00 | 0.00 | 0.40 | 0.00 | 17 | Ciliated Cell |
| Pla2g16       | 1.06 | 0.00 | 0.00 | 0.50 | 0.04 | 17 | Ciliated Cell |
| Sema3e        | 1.06 | 0.00 | 0.00 | 0.50 | 0.04 | 17 | Ciliated Cell |
| 6820408C15Rik | 1.05 | 0.00 | 0.00 | 0.41 | 0.00 | 17 | Ciliated Cell |
| Maats1        | 1.05 | 0.00 | 0.00 | 0.42 | 0.01 | 17 | Ciliated Cell |
| Trp53bp2      | 1.05 | 0.00 | 0.00 | 0.51 | 0.08 | 17 | Ciliated Cell |
| Aebp1         | 1.05 | 0.00 | 0.00 | 0.51 | 0.07 | 17 | Ciliated Cell |
| Dync2li1      | 1.05 | 0.00 | 0.00 | 0.46 | 0.03 | 17 | Ciliated Cell |
| Phtf1         | 1.04 | 0.00 | 0.00 | 0.48 | 0.04 | 17 | Ciliated Cell |
| 1700012B09Rik | 1.04 | 0.00 | 0.00 | 0.35 | 0.00 | 17 | Ciliated Cell |
| Slc23a1       | 1.03 | 0.00 | 0.00 | 0.39 | 0.01 | 17 | Ciliated Cell |
| 1500015O10Rik | 1.03 | 0.00 | 0.00 | 0.36 | 0.01 | 17 | Ciliated Cell |
| Prr18         | 1.03 | 0.00 | 0.00 | 0.42 | 0.02 | 17 | Ciliated Cell |
| Ubxn10        | 1.03 | 0.00 | 0.00 | 0.41 | 0.00 | 17 | Ciliated Cell |
| Arl3          | 1.03 | 0.00 | 0.00 | 0.60 | 0.12 | 17 | Ciliated Cell |
| Ttc18         | 1.02 | 0.00 | 0.00 | 0.39 | 0.00 | 17 | Ciliated Cell |
| Fam47e        | 1.02 | 0.00 | 0.00 | 0.37 | 0.00 | 17 | Ciliated Cell |
| Spef1         | 1.02 | 0.00 | 0.00 | 0.47 | 0.03 | 17 | Ciliated Cell |
| Pdgfa         | 1.02 | 0.00 | 0.00 | 0.59 | 0.10 | 17 | Ciliated Cell |
| Ankrd65       | 1.02 | 0.00 | 0.00 | 0.36 | 0.00 | 17 | Ciliated Cell |
| Gm867         | 1.01 | 0.00 | 0.00 | 0.35 | 0.00 | 17 | Ciliated Cell |
| Dcdc2b        | 1.01 | 0.00 | 0.00 | 0.41 | 0.01 | 17 | Ciliated Cell |
| Ankrd42       | 1.01 | 0.00 | 0.00 | 0.42 | 0.01 | 17 | Ciliated Cell |
| Wdr63         | 1.01 | 0.00 | 0.00 | 0.39 | 0.00 | 17 | Ciliated Cell |
| Ift57         | 1.01 | 0.00 | 0.00 | 0.45 | 0.03 | 17 | Ciliated Cell |
| Sord          | 1.01 | 0.00 | 0.00 | 0.43 | 0.03 | 17 | Ciliated Cell |
| Dync2h1       | 1.00 | 0.00 | 0.00 | 0.44 | 0.03 | 17 | Ciliated Cell |
| 4930451C15Rik | 1.00 | 0.00 | 0.00 | 0.36 | 0.00 | 17 | Ciliated Cell |
| Ttc29         | 0.99 | 0.00 | 0.00 | 0.37 | 0.00 | 17 | Ciliated Cell |
| Dusp18        | 0.99 | 0.00 | 0.00 | 0.42 | 0.01 | 17 | Ciliated Cell |
| Dusp14        | 0.99 | 0.00 | 0.00 | 0.43 | 0.02 | 17 | Ciliated Cell |
| Arhgef28      | 0.98 | 0.00 | 0.00 | 0.44 | 0.03 | 17 | Ciliated Cell |
| B9d1          | 0.98 | 0.00 | 0.00 | 0.43 | 0.02 | 17 | Ciliated Cell |
| Fsd1l         | 0.97 | 0.00 | 0.00 | 0.42 | 0.02 | 17 | Ciliated Cell |
| Dzip1l        | 0.97 | 0.00 | 0.00 | 0.43 | 0.03 | 17 | Ciliated Cell |
| Rabgap1l      | 0.96 | 0.00 | 0.00 | 0.56 | 0.10 | 17 | Ciliated Cell |
| Fam84b        | 0.96 | 0.00 | 0.00 | 0.43 | 0.05 | 17 | Ciliated Cell |
| Rabl2         | 0.95 | 0.00 | 0.00 | 0.43 | 0.02 | 17 | Ciliated Cell |
| Scnn1a        | 0.95 | 0.00 | 0.00 | 0.52 | 0.06 | 17 | Ciliated Cell |
| Appl2         | 0.95 | 0.00 | 0.00 | 0.47 | 0.06 | 17 | Ciliated Cell |
| Ldhb          | 0.95 | 0.00 | 0.00 | 0.50 | 0.07 | 17 | Ciliated Cell |
| Tob1          | 0.94 | 0.00 | 0.00 | 0.46 | 0.06 | 17 | Ciliated Cell |
| Slc25a17      | 0.94 | 0.00 | 0.00 | 0.53 | 0.08 | 17 | Ciliated Cell |

|               |      |      |      |      |      |    |               |
|---------------|------|------|------|------|------|----|---------------|
| Hydin         | 0.94 | 0.00 | 0.00 | 0.33 | 0.00 | 17 | Ciliated Cell |
| Fam81a        | 0.94 | 0.00 | 0.00 | 0.38 | 0.02 | 17 | Ciliated Cell |
| Syt5          | 0.94 | 0.00 | 0.00 | 0.33 | 0.00 | 17 | Ciliated Cell |
| Dcdc2a        | 0.94 | 0.00 | 0.00 | 0.35 | 0.00 | 17 | Ciliated Cell |
| Elmod1        | 0.93 | 0.00 | 0.00 | 0.33 | 0.00 | 17 | Ciliated Cell |
| Nek1          | 0.93 | 0.00 | 0.00 | 0.44 | 0.05 | 17 | Ciliated Cell |
| Lmo7          | 0.93 | 0.00 | 0.00 | 0.64 | 0.12 | 17 | Ciliated Cell |
| Zbbx          | 0.93 | 0.00 | 0.00 | 0.36 | 0.00 | 17 | Ciliated Cell |
| Zdhhc1        | 0.93 | 0.00 | 0.00 | 0.40 | 0.03 | 17 | Ciliated Cell |
| Rpgr          | 0.92 | 0.00 | 0.00 | 0.40 | 0.02 | 17 | Ciliated Cell |
| Plcb3         | 0.92 | 0.00 | 0.00 | 0.45 | 0.06 | 17 | Ciliated Cell |
| Cyp2b10       | 0.91 | 0.00 | 0.00 | 0.32 | 0.00 | 17 | Ciliated Cell |
| Tjp3          | 0.91 | 0.00 | 0.00 | 0.37 | 0.02 | 17 | Ciliated Cell |
| 2410004P03Rik | 0.91 | 0.00 | 0.00 | 0.36 | 0.00 | 17 | Ciliated Cell |
| Gm166         | 0.91 | 0.00 | 0.00 | 0.39 | 0.01 | 17 | Ciliated Cell |
| 1700023L04Rik | 0.91 | 0.00 | 0.00 | 0.37 | 0.02 | 17 | Ciliated Cell |
| Tekt4         | 0.91 | 0.00 | 0.00 | 0.34 | 0.00 | 17 | Ciliated Cell |
| Gm1673        | 0.91 | 0.00 | 0.00 | 0.44 | 0.04 | 17 | Ciliated Cell |
| Aig1          | 0.91 | 0.00 | 0.00 | 0.50 | 0.06 | 17 | Ciliated Cell |
| 1700001L19Rik | 0.90 | 0.00 | 0.00 | 0.37 | 0.00 | 17 | Ciliated Cell |
| Eml2          | 0.90 | 0.00 | 0.00 | 0.40 | 0.03 | 17 | Ciliated Cell |
| Oscp1         | 0.90 | 0.00 | 0.00 | 0.39 | 0.01 | 17 | Ciliated Cell |
| Gsto1         | 0.90 | 0.00 | 0.00 | 0.46 | 0.05 | 17 | Ciliated Cell |
| Ccdc96        | 0.90 | 0.00 | 0.00 | 0.33 | 0.00 | 17 | Ciliated Cell |
| Cds1          | 0.90 | 0.00 | 0.00 | 0.39 | 0.02 | 17 | Ciliated Cell |
| Mdm1          | 0.90 | 0.00 | 0.00 | 0.38 | 0.03 | 17 | Ciliated Cell |
| Ttc39a        | 0.90 | 0.00 | 0.00 | 0.35 | 0.00 | 17 | Ciliated Cell |
| Smim6         | 0.89 | 0.00 | 0.00 | 0.40 | 0.03 | 17 | Ciliated Cell |
| Dnah9         | 0.89 | 0.00 | 0.00 | 0.37 | 0.00 | 17 | Ciliated Cell |
| Mapk15        | 0.89 | 0.00 | 0.00 | 0.36 | 0.00 | 17 | Ciliated Cell |
| Ccdc170       | 0.88 | 0.00 | 0.00 | 0.33 | 0.00 | 17 | Ciliated Cell |
| Gm216         | 0.88 | 0.00 | 0.00 | 0.31 | 0.00 | 17 | Ciliated Cell |
| Ccdc65        | 0.88 | 0.00 | 0.00 | 0.35 | 0.00 | 17 | Ciliated Cell |
| Rpgrip1l      | 0.88 | 0.00 | 0.00 | 0.37 | 0.02 | 17 | Ciliated Cell |
| Spata24       | 0.88 | 0.00 | 0.00 | 0.37 | 0.03 | 17 | Ciliated Cell |
| Spata17       | 0.87 | 0.00 | 0.00 | 0.33 | 0.00 | 17 | Ciliated Cell |
| Porcn         | 0.87 | 0.00 | 0.00 | 0.38 | 0.02 | 17 | Ciliated Cell |
| Ttc12         | 0.87 | 0.00 | 0.00 | 0.35 | 0.01 | 17 | Ciliated Cell |
| Cyb561        | 0.86 | 0.00 | 0.00 | 0.42 | 0.03 | 17 | Ciliated Cell |
| Odf2l         | 0.86 | 0.00 | 0.00 | 0.40 | 0.05 | 17 | Ciliated Cell |
| 1700028P14Rik | 0.86 | 0.00 | 0.00 | 0.33 | 0.00 | 17 | Ciliated Cell |
| Wwc1          | 0.85 | 0.00 | 0.00 | 0.44 | 0.06 | 17 | Ciliated Cell |
| 1700019L03Rik | 0.85 | 0.00 | 0.00 | 0.28 | 0.00 | 17 | Ciliated Cell |

|               |      |      |      |      |      |    |               |
|---------------|------|------|------|------|------|----|---------------|
| Hmgcs2        | 0.85 | 0.00 | 0.00 | 0.33 | 0.01 | 17 | Ciliated Cell |
| Ebp           | 0.85 | 0.00 | 0.00 | 0.48 | 0.07 | 17 | Ciliated Cell |
| Tctex1d2      | 0.85 | 0.00 | 0.00 | 0.36 | 0.03 | 17 | Ciliated Cell |
| Pcbd1         | 0.85 | 0.00 | 0.00 | 0.38 | 0.02 | 17 | Ciliated Cell |
| Hs6st2        | 0.85 | 0.00 | 0.00 | 0.33 | 0.01 | 17 | Ciliated Cell |
| Rmdn1         | 0.84 | 0.00 | 0.00 | 0.44 | 0.05 | 17 | Ciliated Cell |
| Zmynd10       | 0.84 | 0.00 | 0.00 | 0.35 | 0.00 | 17 | Ciliated Cell |
| Fermt1        | 0.84 | 0.00 | 0.00 | 0.27 | 0.00 | 17 | Ciliated Cell |
| Sox2          | 0.83 | 0.00 | 0.00 | 0.31 | 0.00 | 17 | Ciliated Cell |
| Slc39a4       | 0.83 | 0.00 | 0.00 | 0.34 | 0.01 | 17 | Ciliated Cell |
| Dnaic2        | 0.83 | 0.00 | 0.00 | 0.32 | 0.00 | 17 | Ciliated Cell |
| Rnf128        | 0.83 | 0.00 | 0.00 | 0.33 | 0.01 | 17 | Ciliated Cell |
| Wdr65         | 0.83 | 0.00 | 0.00 | 0.33 | 0.00 | 17 | Ciliated Cell |
| Tex9          | 0.83 | 0.00 | 0.00 | 0.38 | 0.03 | 17 | Ciliated Cell |
| Stim1         | 0.83 | 0.00 | 0.00 | 0.42 | 0.06 | 17 | Ciliated Cell |
| Foxa2         | 0.82 | 0.00 | 0.00 | 0.38 | 0.04 | 17 | Ciliated Cell |
| Myo5c         | 0.82 | 0.00 | 0.00 | 0.47 | 0.07 | 17 | Ciliated Cell |
| Bola1         | 0.82 | 0.00 | 0.00 | 0.44 | 0.06 | 17 | Ciliated Cell |
| Agbl2         | 0.82 | 0.00 | 0.00 | 0.32 | 0.00 | 17 | Ciliated Cell |
| Fbxo36        | 0.82 | 0.00 | 0.00 | 0.34 | 0.01 | 17 | Ciliated Cell |
| Cgn           | 0.82 | 0.00 | 0.00 | 0.38 | 0.03 | 17 | Ciliated Cell |
| Ptn           | 0.82 | 0.00 | 0.00 | 0.33 | 0.03 | 17 | Ciliated Cell |
| Slc23a2       | 0.82 | 0.00 | 0.00 | 0.29 | 0.03 | 17 | Ciliated Cell |
| Cobl          | 0.81 | 0.00 | 0.00 | 0.34 | 0.02 | 17 | Ciliated Cell |
| Jag1          | 0.81 | 0.00 | 0.00 | 0.40 | 0.04 | 17 | Ciliated Cell |
| Endog         | 0.80 | 0.00 | 0.00 | 0.31 | 0.02 | 17 | Ciliated Cell |
| Gstz1         | 0.80 | 0.00 | 0.00 | 0.38 | 0.04 | 17 | Ciliated Cell |
| Kcnmb2        | 0.80 | 0.00 | 0.00 | 0.32 | 0.00 | 17 | Ciliated Cell |
| Piwil4        | 0.80 | 0.00 | 0.00 | 0.28 | 0.01 | 17 | Ciliated Cell |
| Ccdc135       | 0.80 | 0.00 | 0.00 | 0.30 | 0.00 | 17 | Ciliated Cell |
| 1700040L02Rik | 0.79 | 0.00 | 0.00 | 0.31 | 0.00 | 17 | Ciliated Cell |
| Rab15         | 0.79 | 0.00 | 0.00 | 0.35 | 0.02 | 17 | Ciliated Cell |
| 1700029J07Rik | 0.79 | 0.00 | 0.00 | 0.32 | 0.01 | 17 | Ciliated Cell |
| Iqub          | 0.79 | 0.00 | 0.00 | 0.29 | 0.00 | 17 | Ciliated Cell |
| D430036J16Rik | 0.79 | 0.00 | 0.00 | 0.30 | 0.00 | 17 | Ciliated Cell |
| Fam179a       | 0.79 | 0.00 | 0.00 | 0.31 | 0.00 | 17 | Ciliated Cell |
| Ccdc151       | 0.79 | 0.00 | 0.00 | 0.30 | 0.00 | 17 | Ciliated Cell |
| Ccdc81        | 0.78 | 0.00 | 0.00 | 0.28 | 0.00 | 17 | Ciliated Cell |
| Casc1         | 0.78 | 0.00 | 0.00 | 0.30 | 0.01 | 17 | Ciliated Cell |
| Wdr19         | 0.78 | 0.00 | 0.00 | 0.30 | 0.01 | 17 | Ciliated Cell |
| Kcnrg         | 0.78 | 0.00 | 0.00 | 0.26 | 0.00 | 17 | Ciliated Cell |
| Fhdc1         | 0.78 | 0.00 | 0.00 | 0.34 | 0.01 | 17 | Ciliated Cell |
| Mr1           | 0.78 | 0.00 | 0.00 | 0.34 | 0.04 | 17 | Ciliated Cell |

|               |      |      |      |      |      |    |               |
|---------------|------|------|------|------|------|----|---------------|
| Irak1bp1      | 0.78 | 0.00 | 0.00 | 0.35 | 0.02 | 17 | Ciliated Cell |
| Usp2          | 0.77 | 0.00 | 0.00 | 0.34 | 0.01 | 17 | Ciliated Cell |
| D630024D03Rik | 0.77 | 0.00 | 0.00 | 0.28 | 0.00 | 17 | Ciliated Cell |
| Dzip1         | 0.77 | 0.00 | 0.00 | 0.33 | 0.03 | 17 | Ciliated Cell |
| Dnajb13       | 0.77 | 0.00 | 0.00 | 0.31 | 0.00 | 17 | Ciliated Cell |
| Dnal1         | 0.77 | 0.00 | 0.00 | 0.35 | 0.02 | 17 | Ciliated Cell |
| 9330101J02Rik | 0.76 | 0.00 | 0.00 | 0.29 | 0.00 | 17 | Ciliated Cell |
| Syt10         | 0.76 | 0.00 | 0.00 | 0.27 | 0.00 | 17 | Ciliated Cell |
| Gm16136       | 0.76 | 0.00 | 0.00 | 0.30 | 0.01 | 17 | Ciliated Cell |
| Ccdc162       | 0.76 | 0.00 | 0.00 | 0.28 | 0.00 | 17 | Ciliated Cell |
| 4930556M19Rik | 0.76 | 0.00 | 0.00 | 0.34 | 0.04 | 17 | Ciliated Cell |
| Igfbp2        | 0.75 | 0.00 | 0.00 | 0.33 | 0.02 | 17 | Ciliated Cell |
| Dalrd3        | 0.75 | 0.00 | 0.00 | 0.39 | 0.03 | 17 | Ciliated Cell |
| Gfra1         | 0.75 | 0.00 | 0.00 | 0.30 | 0.01 | 17 | Ciliated Cell |
| Fhit          | 0.75 | 0.00 | 0.00 | 0.28 | 0.00 | 17 | Ciliated Cell |
| Rgs22         | 0.75 | 0.00 | 0.00 | 0.28 | 0.00 | 17 | Ciliated Cell |
| Cep164        | 0.74 | 0.00 | 0.00 | 0.39 | 0.05 | 17 | Ciliated Cell |
| Lrrc46        | 0.74 | 0.00 | 0.00 | 0.30 | 0.00 | 17 | Ciliated Cell |
| Dnah11        | 0.74 | 0.00 | 0.00 | 0.29 | 0.01 | 17 | Ciliated Cell |
| Ccdc147       | 0.74 | 0.00 | 0.00 | 0.27 | 0.00 | 17 | Ciliated Cell |
| Vpreb3        | 0.73 | 0.00 | 0.00 | 0.30 | 0.02 | 17 | Ciliated Cell |
| Ubxn11        | 0.73 | 0.00 | 0.00 | 0.32 | 0.01 | 17 | Ciliated Cell |
| Fam13a        | 0.72 | 0.00 | 0.00 | 0.32 | 0.02 | 17 | Ciliated Cell |
| Plekha7       | 0.72 | 0.00 | 0.00 | 0.31 | 0.02 | 17 | Ciliated Cell |
| Ttc30b        | 0.72 | 0.00 | 0.00 | 0.32 | 0.01 | 17 | Ciliated Cell |
| Slc44a3       | 0.72 | 0.00 | 0.00 | 0.33 | 0.02 | 17 | Ciliated Cell |
| Mycbpap       | 0.72 | 0.00 | 0.00 | 0.27 | 0.00 | 17 | Ciliated Cell |
| Ddr1          | 0.71 | 0.00 | 0.00 | 0.33 | 0.03 | 17 | Ciliated Cell |
| 4930562C15Rik | 0.71 | 0.00 | 0.00 | 0.28 | 0.00 | 17 | Ciliated Cell |
| Ift172        | 0.71 | 0.00 | 0.00 | 0.30 | 0.02 | 17 | Ciliated Cell |
| Fam149a       | 0.71 | 0.00 | 0.00 | 0.30 | 0.02 | 17 | Ciliated Cell |
| Pla2g4a       | 0.70 | 0.00 | 0.00 | 0.33 | 0.02 | 17 | Ciliated Cell |
| Lypd2         | 0.70 | 0.00 | 0.00 | 0.26 | 0.01 | 17 | Ciliated Cell |
| Tmem216       | 0.70 | 0.00 | 0.00 | 0.34 | 0.03 | 17 | Ciliated Cell |
| Lrrc45        | 0.70 | 0.00 | 0.00 | 0.36 | 0.03 | 17 | Ciliated Cell |
| Slc1a4        | 0.70 | 0.00 | 0.00 | 0.27 | 0.02 | 17 | Ciliated Cell |
| Cdkl4         | 0.69 | 0.00 | 0.00 | 0.27 | 0.00 | 17 | Ciliated Cell |
| Pir           | 0.69 | 0.00 | 0.00 | 0.33 | 0.03 | 17 | Ciliated Cell |
| Dnaic1        | 0.69 | 0.00 | 0.00 | 0.25 | 0.01 | 17 | Ciliated Cell |
| Tex26         | 0.69 | 0.00 | 0.00 | 0.25 | 0.00 | 17 | Ciliated Cell |
| Efcab12       | 0.69 | 0.00 | 0.00 | 0.26 | 0.00 | 17 | Ciliated Cell |
| Susd2         | 0.69 | 0.00 | 0.00 | 0.25 | 0.00 | 17 | Ciliated Cell |
| Prom1         | 0.68 | 0.00 | 0.00 | 0.30 | 0.03 | 17 | Ciliated Cell |

|               |      |      |      |      |      |    |               |
|---------------|------|------|------|------|------|----|---------------|
| 4430402118Rik | 0.68 | 0.00 | 0.00 | 0.27 | 0.01 | 17 | Ciliated Cell |
| Pacrg         | 0.66 | 0.00 | 0.00 | 0.26 | 0.00 | 17 | Ciliated Cell |
| Eno4          | 0.66 | 0.00 | 0.00 | 0.27 | 0.00 | 17 | Ciliated Cell |
| Wdyhv1        | 0.66 | 0.00 | 0.00 | 0.33 | 0.03 | 17 | Ciliated Cell |
| Rnf186        | 0.66 | 0.00 | 0.00 | 0.27 | 0.01 | 17 | Ciliated Cell |
| Dnaaf3        | 0.66 | 0.00 | 0.00 | 0.30 | 0.00 | 17 | Ciliated Cell |
| Perp          | 0.66 | 0.00 | 0.00 | 0.32 | 0.03 | 17 | Ciliated Cell |
| Ribc1         | 0.66 | 0.00 | 0.00 | 0.25 | 0.00 | 17 | Ciliated Cell |
| Gm16119       | 0.66 | 0.00 | 0.00 | 0.26 | 0.00 | 17 | Ciliated Cell |
| Armc3         | 0.66 | 0.00 | 0.00 | 0.25 | 0.01 | 17 | Ciliated Cell |
| Ctxn1         | 0.65 | 0.00 | 0.00 | 0.31 | 0.02 | 17 | Ciliated Cell |
| Cmb1          | 0.65 | 0.00 | 0.00 | 0.27 | 0.01 | 17 | Ciliated Cell |
| Tacstd2       | 0.65 | 0.00 | 0.00 | 0.30 | 0.03 | 17 | Ciliated Cell |
| Tnn           | 0.65 | 0.00 | 0.00 | 0.27 | 0.00 | 17 | Ciliated Cell |
| Ropn1l        | 0.65 | 0.00 | 0.00 | 0.27 | 0.01 | 17 | Ciliated Cell |
| Dnaja4        | 0.64 | 0.00 | 0.00 | 0.27 | 0.01 | 17 | Ciliated Cell |
| Dnah10        | 0.63 | 0.00 | 0.00 | 0.26 | 0.00 | 17 | Ciliated Cell |
| Galnt3        | 0.63 | 0.00 | 0.00 | 0.29 | 0.02 | 17 | Ciliated Cell |
| Wdr35         | 0.63 | 0.00 | 0.00 | 0.29 | 0.02 | 17 | Ciliated Cell |
| Acox2         | 0.63 | 0.00 | 0.00 | 0.26 | 0.00 | 17 | Ciliated Cell |
| Spag8         | 0.61 | 0.00 | 0.00 | 0.26 | 0.00 | 17 | Ciliated Cell |
| Wdr31         | 0.60 | 0.00 | 0.00 | 0.25 | 0.01 | 17 | Ciliated Cell |
| Prkcz         | 0.59 | 0.00 | 0.00 | 0.28 | 0.02 | 17 | Ciliated Cell |
| Stk30         | 0.59 | 0.00 | 0.00 | 0.27 | 0.01 | 17 | Ciliated Cell |
| 2310007B03Rik | 0.58 | 0.00 | 0.00 | 0.27 | 0.02 | 17 | Ciliated Cell |
| Arl6          | 0.58 | 0.00 | 0.00 | 0.27 | 0.02 | 17 | Ciliated Cell |
| Foxa1         | 0.58 | 0.00 | 0.00 | 0.26 | 0.02 | 17 | Ciliated Cell |
| Daf2          | 0.56 | 0.00 | 0.00 | 0.28 | 0.02 | 17 | Ciliated Cell |
| Dixdc1        | 0.56 | 0.00 | 0.00 | 0.28 | 0.02 | 17 | Ciliated Cell |
| Wdr34         | 0.55 | 0.00 | 0.00 | 0.25 | 0.01 | 17 | Ciliated Cell |
| Kcnj13        | 0.54 | 0.00 | 0.00 | 0.25 | 0.01 | 17 | Ciliated Cell |
| Pfn2          | 0.51 | 0.00 | 0.00 | 0.27 | 0.02 | 17 | Ciliated Cell |
| Ift27         | 0.73 | 0.00 | 0.00 | 0.41 | 0.06 | 17 | Ciliated Cell |
| Ank3          | 0.80 | 0.00 | 0.00 | 0.47 | 0.07 | 17 | Ciliated Cell |
| B230118H07Rik | 0.59 | 0.00 | 0.00 | 0.31 | 0.03 | 17 | Ciliated Cell |
| Maob          | 0.74 | 0.00 | 0.00 | 0.30 | 0.03 | 17 | Ciliated Cell |
| Dnajb2        | 0.57 | 0.00 | 0.00 | 0.27 | 0.02 | 17 | Ciliated Cell |
| Spice1        | 0.70 | 0.00 | 0.00 | 0.35 | 0.04 | 17 | Ciliated Cell |
| Tsga10        | 0.65 | 0.00 | 0.00 | 0.28 | 0.03 | 17 | Ciliated Cell |
| Sdccag8       | 0.77 | 0.00 | 0.00 | 0.39 | 0.05 | 17 | Ciliated Cell |
| Hmgn3         | 0.77 | 0.00 | 0.00 | 0.37 | 0.05 | 17 | Ciliated Cell |
| Bok           | 0.54 | 0.00 | 0.00 | 0.26 | 0.02 | 17 | Ciliated Cell |
| Slc9a3r1      | 0.58 | 0.00 | 0.00 | 0.33 | 0.04 | 17 | Ciliated Cell |

|          |      |      |      |      |      |    |               |
|----------|------|------|------|------|------|----|---------------|
| Tmc4     | 0.63 | 0.00 | 0.00 | 0.32 | 0.04 | 17 | Ciliated Cell |
| Fam134b  | 0.78 | 0.00 | 0.00 | 0.42 | 0.06 | 17 | Ciliated Cell |
| Gstm1    | 1.03 | 0.00 | 0.00 | 0.64 | 0.14 | 17 | Ciliated Cell |
| Fgfr1op  | 0.66 | 0.00 | 0.00 | 0.36 | 0.05 | 17 | Ciliated Cell |
| Gtl3     | 1.04 | 0.00 | 0.00 | 0.66 | 0.16 | 17 | Ciliated Cell |
| Alcam    | 1.02 | 0.00 | 0.00 | 0.81 | 0.22 | 17 | Ciliated Cell |
| Dnajc15  | 0.80 | 0.00 | 0.00 | 0.46 | 0.08 | 17 | Ciliated Cell |
| Nudt4    | 1.15 | 0.00 | 0.00 | 0.67 | 0.16 | 17 | Ciliated Cell |
| Sqle     | 0.61 | 0.00 | 0.00 | 0.31 | 0.04 | 17 | Ciliated Cell |
| Dynlt1c  | 1.19 | 0.00 | 0.00 | 0.79 | 0.26 | 17 | Ciliated Cell |
| Runx1    | 0.78 | 0.00 | 0.00 | 0.42 | 0.07 | 17 | Ciliated Cell |
| Srsf10   | 1.20 | 0.00 | 0.00 | 0.79 | 0.24 | 17 | Ciliated Cell |
| Sorl1    | 0.78 | 0.00 | 0.00 | 0.43 | 0.07 | 17 | Ciliated Cell |
| Hspb11   | 0.75 | 0.00 | 0.00 | 0.41 | 0.06 | 17 | Ciliated Cell |
| Med31    | 0.82 | 0.00 | 0.00 | 0.45 | 0.08 | 17 | Ciliated Cell |
| Cep19    | 0.61 | 0.00 | 0.00 | 0.33 | 0.04 | 17 | Ciliated Cell |
| Dynlt1b  | 1.21 | 0.00 | 0.00 | 0.76 | 0.24 | 17 | Ciliated Cell |
| Irx3     | 0.75 | 0.00 | 0.00 | 0.43 | 0.07 | 17 | Ciliated Cell |
| Dynlt1f  | 1.18 | 0.00 | 0.00 | 0.75 | 0.23 | 17 | Ciliated Cell |
| Katnal1  | 0.63 | 0.00 | 0.00 | 0.26 | 0.03 | 17 | Ciliated Cell |
| Gch1     | 0.56 | 0.00 | 0.00 | 0.26 | 0.03 | 17 | Ciliated Cell |
| Fam174b  | 0.60 | 0.00 | 0.00 | 0.35 | 0.05 | 17 | Ciliated Cell |
| Acot1    | 0.80 | 0.00 | 0.00 | 0.43 | 0.07 | 17 | Ciliated Cell |
| Atp1b1   | 0.86 | 0.00 | 0.00 | 0.72 | 0.18 | 17 | Ciliated Cell |
| Fgf1     | 0.74 | 0.00 | 0.00 | 0.38 | 0.06 | 17 | Ciliated Cell |
| Cc2d2a   | 0.71 | 0.00 | 0.00 | 0.35 | 0.05 | 17 | Ciliated Cell |
| Slc6a14  | 0.61 | 0.00 | 0.00 | 0.28 | 0.03 | 17 | Ciliated Cell |
| Mdm2     | 0.83 | 0.00 | 0.00 | 0.46 | 0.08 | 17 | Ciliated Cell |
| Kifap3   | 0.92 | 0.00 | 0.00 | 0.55 | 0.12 | 17 | Ciliated Cell |
| Ift46    | 0.57 | 0.00 | 0.00 | 0.33 | 0.04 | 17 | Ciliated Cell |
| Hes6     | 0.73 | 0.00 | 0.00 | 0.36 | 0.05 | 17 | Ciliated Cell |
| Lztfl1   | 0.80 | 0.00 | 0.00 | 0.47 | 0.09 | 17 | Ciliated Cell |
| Gdpd1    | 0.62 | 0.00 | 0.00 | 0.38 | 0.06 | 17 | Ciliated Cell |
| Ccp110   | 0.68 | 0.00 | 0.00 | 0.34 | 0.05 | 17 | Ciliated Cell |
| Cxadr    | 0.68 | 0.00 | 0.00 | 0.37 | 0.06 | 17 | Ciliated Cell |
| Apoa1bp  | 0.95 | 0.00 | 0.00 | 0.59 | 0.14 | 17 | Ciliated Cell |
| Cmtm8    | 0.83 | 0.00 | 0.00 | 0.55 | 0.12 | 17 | Ciliated Cell |
| Akip1    | 0.73 | 0.00 | 0.00 | 0.37 | 0.06 | 17 | Ciliated Cell |
| Alas1    | 0.97 | 0.00 | 0.00 | 0.53 | 0.12 | 17 | Ciliated Cell |
| Ppp1r14c | 0.69 | 0.00 | 0.00 | 0.53 | 0.11 | 17 | Ciliated Cell |
| Dynlt1a  | 1.11 | 0.00 | 0.00 | 0.71 | 0.22 | 17 | Ciliated Cell |
| Akap9    | 1.18 | 0.00 | 0.00 | 0.87 | 0.35 | 17 | Ciliated Cell |
| Cpm      | 0.97 | 0.00 | 0.00 | 0.67 | 0.17 | 17 | Ciliated Cell |

|                |      |      |      |      |      |    |               |
|----------------|------|------|------|------|------|----|---------------|
| Arhgap18       | 0.76 | 0.00 | 0.00 | 0.41 | 0.07 | 17 | Ciliated Cell |
| 2610301B20Rik  | 0.53 | 0.00 | 0.00 | 0.29 | 0.04 | 17 | Ciliated Cell |
| Mal2           | 0.61 | 0.00 | 0.00 | 0.38 | 0.06 | 17 | Ciliated Cell |
| Rassf9         | 0.53 | 0.00 | 0.00 | 0.29 | 0.04 | 17 | Ciliated Cell |
| Baiap2l1       | 0.62 | 0.00 | 0.00 | 0.29 | 0.04 | 17 | Ciliated Cell |
| Hsph1          | 0.74 | 0.00 | 0.00 | 0.32 | 0.05 | 17 | Ciliated Cell |
| Sod2           | 0.86 | 0.00 | 0.00 | 0.56 | 0.13 | 17 | Ciliated Cell |
| Fbxw9          | 0.50 | 0.00 | 0.00 | 0.27 | 0.03 | 17 | Ciliated Cell |
| S100a11        | 1.16 | 0.00 | 0.00 | 0.91 | 0.48 | 17 | Ciliated Cell |
| Sc1t1          | 0.67 | 0.00 | 0.00 | 0.37 | 0.06 | 17 | Ciliated Cell |
| Mgst3          | 0.78 | 0.00 | 0.00 | 0.47 | 0.09 | 17 | Ciliated Cell |
| Msi2           | 0.93 | 0.00 | 0.00 | 0.63 | 0.17 | 17 | Ciliated Cell |
| Grb14          | 0.61 | 0.00 | 0.00 | 0.36 | 0.06 | 17 | Ciliated Cell |
| Gga1           | 0.55 | 0.00 | 0.00 | 0.32 | 0.05 | 17 | Ciliated Cell |
| Ankrd32        | 0.87 | 0.00 | 0.00 | 0.48 | 0.10 | 17 | Ciliated Cell |
| Odf2           | 0.72 | 0.00 | 0.00 | 0.43 | 0.08 | 17 | Ciliated Cell |
| Fam53b         | 0.58 | 0.00 | 0.00 | 0.35 | 0.05 | 17 | Ciliated Cell |
| Smco4          | 0.68 | 0.00 | 0.00 | 0.40 | 0.07 | 17 | Ciliated Cell |
| Oxct1          | 0.89 | 0.00 | 0.00 | 0.58 | 0.14 | 17 | Ciliated Cell |
| Cyp4b1         | 0.66 | 0.00 | 0.00 | 0.50 | 0.11 | 17 | Ciliated Cell |
| Rcc2           | 0.61 | 0.00 | 0.00 | 0.34 | 0.05 | 17 | Ciliated Cell |
| Odc1           | 0.63 | 0.00 | 0.00 | 0.35 | 0.06 | 17 | Ciliated Cell |
| Nudt14         | 0.61 | 0.00 | 0.00 | 0.37 | 0.06 | 17 | Ciliated Cell |
| Cdkn1a         | 0.84 | 0.00 | 0.00 | 0.61 | 0.16 | 17 | Ciliated Cell |
| Tbcel          | 0.69 | 0.00 | 0.00 | 0.36 | 0.06 | 17 | Ciliated Cell |
| Ssx2ip         | 0.54 | 0.00 | 0.00 | 0.28 | 0.04 | 17 | Ciliated Cell |
| 1700047117Rik2 | 0.89 | 0.00 | 0.00 | 0.64 | 0.18 | 17 | Ciliated Cell |
| Spop           | 1.09 | 0.00 | 0.00 | 0.81 | 0.32 | 17 | Ciliated Cell |
| Ocln           | 0.55 | 0.00 | 0.00 | 0.29 | 0.04 | 17 | Ciliated Cell |
| Hipk3          | 0.59 | 0.00 | 0.00 | 0.34 | 0.06 | 17 | Ciliated Cell |
| S100a6         | 1.09 | 0.00 | 0.00 | 0.81 | 0.31 | 17 | Ciliated Cell |
| Sned1          | 0.59 | 0.00 | 0.00 | 0.33 | 0.05 | 17 | Ciliated Cell |
| Acot13         | 0.66 | 0.00 | 0.00 | 0.40 | 0.08 | 17 | Ciliated Cell |
| Ndufaf3        | 0.59 | 0.00 | 0.00 | 0.31 | 0.05 | 17 | Ciliated Cell |
| Trim37         | 0.70 | 0.00 | 0.00 | 0.40 | 0.08 | 17 | Ciliated Cell |
| Fam177a        | 0.93 | 0.00 | 0.00 | 0.70 | 0.23 | 17 | Ciliated Cell |
| Pcbd2          | 0.63 | 0.00 | 0.00 | 0.35 | 0.06 | 17 | Ciliated Cell |
| Ptprf          | 0.68 | 0.00 | 0.00 | 0.60 | 0.15 | 17 | Ciliated Cell |
| Tagap1         | 0.55 | 0.00 | 0.00 | 0.30 | 0.05 | 17 | Ciliated Cell |
| Scgb3a2        | 2.17 | 0.00 | 0.00 | 0.37 | 0.07 | 17 | Ciliated Cell |
| Cluap1         | 0.47 | 0.00 | 0.00 | 0.27 | 0.04 | 17 | Ciliated Cell |
| Pick1          | 0.50 | 0.00 | 0.00 | 0.32 | 0.05 | 17 | Ciliated Cell |
| Cry2           | 0.47 | 0.00 | 0.00 | 0.26 | 0.04 | 17 | Ciliated Cell |

|               |      |      |      |      |      |    |               |
|---------------|------|------|------|------|------|----|---------------|
| Mrps17        | 0.79 | 0.00 | 0.00 | 0.53 | 0.13 | 17 | Ciliated Cell |
| Sfta2         | 0.92 | 0.00 | 0.00 | 0.58 | 0.15 | 17 | Ciliated Cell |
| Epb4.1l5      | 0.50 | 0.00 | 0.00 | 0.26 | 0.04 | 17 | Ciliated Cell |
| Avpi1         | 0.66 | 0.00 | 0.00 | 0.41 | 0.08 | 17 | Ciliated Cell |
| Hipk1         | 0.68 | 0.00 | 0.00 | 0.40 | 0.08 | 17 | Ciliated Cell |
| Plxnb2        | 0.56 | 0.00 | 0.00 | 0.32 | 0.05 | 17 | Ciliated Cell |
| Wdr6          | 0.47 | 0.00 | 0.00 | 0.29 | 0.04 | 17 | Ciliated Cell |
| Wif1          | 0.69 | 0.00 | 0.00 | 0.29 | 0.04 | 17 | Ciliated Cell |
| Cep135        | 0.63 | 0.00 | 0.00 | 0.33 | 0.06 | 17 | Ciliated Cell |
| BC005624      | 0.71 | 0.00 | 0.00 | 0.53 | 0.13 | 17 | Ciliated Cell |
| Tchp          | 0.48 | 0.00 | 0.00 | 0.26 | 0.04 | 17 | Ciliated Cell |
| Anxa2         | 0.96 | 0.00 | 0.00 | 0.89 | 0.47 | 17 | Ciliated Cell |
| Lasp1         | 0.86 | 0.00 | 0.00 | 0.55 | 0.15 | 17 | Ciliated Cell |
| Tuba1a        | 1.05 | 0.00 | 0.00 | 0.92 | 0.50 | 17 | Ciliated Cell |
| Vimp          | 0.96 | 0.00 | 0.00 | 0.76 | 0.29 | 17 | Ciliated Cell |
| Megf6         | 0.51 | 0.00 | 0.00 | 0.26 | 0.04 | 17 | Ciliated Cell |
| 1810037l17Rik | 0.97 | 0.00 | 0.00 | 0.78 | 0.31 | 17 | Ciliated Cell |
| Nr2c2ap       | 0.45 | 0.00 | 0.00 | 0.26 | 0.04 | 17 | Ciliated Cell |
| Map7          | 0.56 | 0.00 | 0.00 | 0.29 | 0.05 | 17 | Ciliated Cell |
| Cep89         | 0.52 | 0.00 | 0.00 | 0.29 | 0.05 | 17 | Ciliated Cell |
| Sccpdh        | 0.57 | 0.00 | 0.00 | 0.31 | 0.05 | 17 | Ciliated Cell |
| Tmem254b      | 0.82 | 0.00 | 0.00 | 0.62 | 0.19 | 17 | Ciliated Cell |
| Sdc1          | 0.74 | 0.00 | 0.00 | 0.48 | 0.11 | 17 | Ciliated Cell |
| Tmem254c      | 0.80 | 0.00 | 0.00 | 0.61 | 0.18 | 17 | Ciliated Cell |
| Crim1         | 0.64 | 0.00 | 0.00 | 0.40 | 0.08 | 17 | Ciliated Cell |
| Ppl           | 0.50 | 0.00 | 0.00 | 0.25 | 0.04 | 17 | Ciliated Cell |
| Hist1h2al     | 0.74 | 0.00 | 0.00 | 0.42 | 0.09 | 17 | Ciliated Cell |
| Cbx6          | 0.65 | 0.00 | 0.00 | 0.44 | 0.10 | 17 | Ciliated Cell |
| Tmem254a      | 0.80 | 0.00 | 0.00 | 0.62 | 0.19 | 17 | Ciliated Cell |
| Emb           | 0.63 | 0.00 | 0.00 | 0.46 | 0.11 | 17 | Ciliated Cell |
| Chuk          | 0.62 | 0.00 | 0.00 | 0.39 | 0.08 | 17 | Ciliated Cell |
| 4931406C07Rik | 0.66 | 0.00 | 0.00 | 0.32 | 0.06 | 17 | Ciliated Cell |
| Ruvbl1        | 0.59 | 0.00 | 0.00 | 0.35 | 0.07 | 17 | Ciliated Cell |
| Kif3b         | 0.53 | 0.00 | 0.00 | 0.32 | 0.06 | 17 | Ciliated Cell |
| Nkx2-1        | 0.59 | 0.00 | 0.00 | 0.43 | 0.09 | 17 | Ciliated Cell |
| Cnp           | 0.55 | 0.00 | 0.00 | 0.29 | 0.05 | 17 | Ciliated Cell |
| Plxnb1        | 0.45 | 0.00 | 0.00 | 0.26 | 0.04 | 17 | Ciliated Cell |
| Emc6          | 0.76 | 0.00 | 0.00 | 0.51 | 0.14 | 17 | Ciliated Cell |
| Ndufc2        | 0.92 | 0.00 | 0.00 | 0.82 | 0.38 | 17 | Ciliated Cell |
| Cit           | 0.51 | 0.00 | 0.00 | 0.27 | 0.04 | 17 | Ciliated Cell |
| Atp13a3       | 0.66 | 0.00 | 0.00 | 0.41 | 0.09 | 17 | Ciliated Cell |
| Gramd2        | 0.46 | 0.00 | 0.00 | 0.28 | 0.05 | 17 | Ciliated Cell |
| Slc25a36      | 0.58 | 0.00 | 0.00 | 0.35 | 0.07 | 17 | Ciliated Cell |

|            |      |      |      |      |      |    |               |
|------------|------|------|------|------|------|----|---------------|
| Dynll1     | 0.95 | 0.00 | 0.00 | 0.85 | 0.44 | 17 | Ciliated Cell |
| Cdc42ep3   | 0.67 | 0.00 | 0.00 | 0.53 | 0.14 | 17 | Ciliated Cell |
| Slc26a2    | 0.62 | 0.00 | 0.00 | 0.33 | 0.06 | 17 | Ciliated Cell |
| Fem1b      | 0.51 | 0.00 | 0.00 | 0.28 | 0.05 | 17 | Ciliated Cell |
| Vapa       | 0.80 | 0.00 | 0.00 | 0.65 | 0.22 | 17 | Ciliated Cell |
| Eif2b2     | 0.57 | 0.00 | 0.00 | 0.34 | 0.07 | 17 | Ciliated Cell |
| Ptgr1      | 0.53 | 0.00 | 0.00 | 0.29 | 0.05 | 17 | Ciliated Cell |
| Baiap2     | 0.56 | 0.00 | 0.00 | 0.36 | 0.08 | 17 | Ciliated Cell |
| Hist1h2bc  | 0.75 | 0.00 | 0.00 | 0.49 | 0.13 | 17 | Ciliated Cell |
| Gbas       | 0.70 | 0.00 | 0.00 | 0.44 | 0.11 | 17 | Ciliated Cell |
| Gas6       | 0.72 | 0.00 | 0.00 | 0.52 | 0.14 | 17 | Ciliated Cell |
| Por        | 0.70 | 0.00 | 0.00 | 0.47 | 0.12 | 17 | Ciliated Cell |
| Dnal4      | 0.42 | 0.00 | 0.00 | 0.27 | 0.04 | 17 | Ciliated Cell |
| Atp1a1     | 0.71 | 0.00 | 0.00 | 0.51 | 0.14 | 17 | Ciliated Cell |
| Hist2h2aa2 | 0.73 | 0.00 | 0.00 | 0.49 | 0.13 | 17 | Ciliated Cell |
| Lgals3bp   | 0.48 | 0.00 | 0.00 | 0.26 | 0.04 | 17 | Ciliated Cell |
| Cib1       | 0.58 | 0.00 | 0.00 | 0.46 | 0.12 | 17 | Ciliated Cell |
| Ide        | 0.55 | 0.00 | 0.00 | 0.38 | 0.08 | 17 | Ciliated Cell |
| Csrp2      | 0.76 | 0.00 | 0.00 | 0.55 | 0.16 | 17 | Ciliated Cell |
| Tes        | 0.60 | 0.00 | 0.00 | 0.40 | 0.09 | 17 | Ciliated Cell |
| Atpif1     | 0.81 | 0.00 | 0.00 | 0.90 | 0.52 | 17 | Ciliated Cell |
| Synj1      | 0.50 | 0.00 | 0.00 | 0.29 | 0.05 | 17 | Ciliated Cell |
| Ahi1       | 0.57 | 0.00 | 0.00 | 0.27 | 0.05 | 17 | Ciliated Cell |
| Chchd4     | 0.48 | 0.00 | 0.00 | 0.27 | 0.05 | 17 | Ciliated Cell |
| BC048507   | 0.61 | 0.00 | 0.00 | 0.46 | 0.12 | 17 | Ciliated Cell |
| Klhdc8b    | 0.52 | 0.00 | 0.00 | 0.32 | 0.06 | 17 | Ciliated Cell |
| Pgrmc1     | 0.72 | 0.00 | 0.00 | 0.57 | 0.18 | 17 | Ciliated Cell |
| Tacc2      | 0.56 | 0.00 | 0.00 | 0.34 | 0.07 | 17 | Ciliated Cell |
| Ssbp4      | 0.43 | 0.00 | 0.00 | 0.29 | 0.06 | 17 | Ciliated Cell |
| Nceh1      | 0.55 | 0.00 | 0.00 | 0.31 | 0.06 | 17 | Ciliated Cell |
| Mgst1      | 0.97 | 0.00 | 0.00 | 0.57 | 0.19 | 17 | Ciliated Cell |
| Gde1       | 0.64 | 0.00 | 0.00 | 0.50 | 0.14 | 17 | Ciliated Cell |
| Clu        | 0.65 | 0.00 | 0.00 | 0.28 | 0.05 | 17 | Ciliated Cell |
| Pisd       | 0.67 | 0.00 | 0.00 | 0.42 | 0.11 | 17 | Ciliated Cell |
| Gnl2       | 0.65 | 0.00 | 0.00 | 0.46 | 0.12 | 17 | Ciliated Cell |
| Crip2      | 0.80 | 0.00 | 0.00 | 0.84 | 0.41 | 17 | Ciliated Cell |
| Chmp2b     | 0.59 | 0.00 | 0.00 | 0.53 | 0.16 | 17 | Ciliated Cell |
| Pygl       | 0.47 | 0.00 | 0.00 | 0.42 | 0.10 | 17 | Ciliated Cell |
| Cbr1       | 0.56 | 0.00 | 0.00 | 0.41 | 0.10 | 17 | Ciliated Cell |
| Rbm47      | 0.48 | 0.00 | 0.00 | 0.27 | 0.05 | 17 | Ciliated Cell |
| Trak1      | 0.45 | 0.00 | 0.00 | 0.28 | 0.05 | 17 | Ciliated Cell |
| Syne1      | 0.60 | 0.00 | 0.00 | 0.41 | 0.10 | 17 | Ciliated Cell |
| Ccdc112    | 0.41 | 0.00 | 0.00 | 0.25 | 0.04 | 17 | Ciliated Cell |

|               |      |      |      |      |      |    |               |
|---------------|------|------|------|------|------|----|---------------|
| Arl13b        | 0.60 | 0.00 | 0.00 | 0.35 | 0.08 | 17 | Ciliated Cell |
| Csgalnact1    | 0.51 | 0.00 | 0.00 | 0.26 | 0.05 | 17 | Ciliated Cell |
| Med19         | 0.57 | 0.00 | 0.00 | 0.42 | 0.11 | 17 | Ciliated Cell |
| Mrpl39        | 0.47 | 0.00 | 0.00 | 0.34 | 0.08 | 17 | Ciliated Cell |
| Cadm1         | 0.53 | 0.00 | 0.00 | 0.49 | 0.14 | 17 | Ciliated Cell |
| Pttg1         | 0.63 | 0.00 | 0.00 | 0.48 | 0.14 | 17 | Ciliated Cell |
| Ccdc137       | 0.49 | 0.00 | 0.00 | 0.32 | 0.07 | 17 | Ciliated Cell |
| Casz1         | 0.54 | 0.00 | 0.00 | 0.48 | 0.13 | 17 | Ciliated Cell |
| Mprlp         | 0.74 | 0.00 | 0.00 | 0.59 | 0.20 | 17 | Ciliated Cell |
| Krt7          | 0.43 | 0.00 | 0.00 | 0.34 | 0.07 | 17 | Ciliated Cell |
| Txnrd1        | 0.67 | 0.00 | 0.00 | 0.41 | 0.11 | 17 | Ciliated Cell |
| Prkci         | 0.60 | 0.00 | 0.00 | 0.46 | 0.13 | 17 | Ciliated Cell |
| Aldoa         | 0.71 | 0.00 | 0.00 | 0.56 | 0.19 | 17 | Ciliated Cell |
| Ckb           | 0.65 | 0.00 | 0.00 | 0.48 | 0.14 | 17 | Ciliated Cell |
| Chka          | 0.56 | 0.00 | 0.00 | 0.39 | 0.10 | 17 | Ciliated Cell |
| Pebp1         | 0.76 | 0.00 | 0.00 | 0.64 | 0.25 | 17 | Ciliated Cell |
| Ccnc          | 0.43 | 0.00 | 0.00 | 0.27 | 0.05 | 17 | Ciliated Cell |
| Swt1          | 0.62 | 0.00 | 0.00 | 0.50 | 0.15 | 17 | Ciliated Cell |
| Ccnd2         | 0.74 | 0.00 | 0.00 | 0.69 | 0.27 | 17 | Ciliated Cell |
| Cby1          | 0.48 | 0.00 | 0.00 | 0.25 | 0.05 | 17 | Ciliated Cell |
| Znhit1        | 0.56 | 0.00 | 0.00 | 0.48 | 0.14 | 17 | Ciliated Cell |
| Ino80b        | 0.43 | 0.00 | 0.00 | 0.29 | 0.06 | 17 | Ciliated Cell |
| Cox14         | 0.65 | 0.00 | 0.00 | 0.60 | 0.21 | 17 | Ciliated Cell |
| Tusc3         | 0.60 | 0.00 | 0.00 | 0.41 | 0.11 | 17 | Ciliated Cell |
| Ahsa1         | 0.61 | 0.00 | 0.00 | 0.44 | 0.12 | 17 | Ciliated Cell |
| Rmdn3         | 0.45 | 0.00 | 0.00 | 0.27 | 0.05 | 17 | Ciliated Cell |
| Unc119b       | 0.46 | 0.00 | 0.00 | 0.26 | 0.05 | 17 | Ciliated Cell |
| Ptges3        | 0.78 | 0.00 | 0.00 | 0.62 | 0.24 | 17 | Ciliated Cell |
| Cisd1         | 0.55 | 0.00 | 0.00 | 0.41 | 0.11 | 17 | Ciliated Cell |
| Mnat1         | 0.61 | 0.00 | 0.00 | 0.41 | 0.11 | 17 | Ciliated Cell |
| Sugt1         | 0.70 | 0.00 | 0.00 | 0.56 | 0.20 | 17 | Ciliated Cell |
| 4922501C03Rik | 0.44 | 0.00 | 0.00 | 0.30 | 0.06 | 17 | Ciliated Cell |
| Cldn18        | 0.29 | 0.00 | 0.00 | 0.56 | 0.17 | 17 | Ciliated Cell |
| Neat1         | 0.62 | 0.00 | 0.00 | 0.69 | 0.27 | 17 | Ciliated Cell |
| Fkbp4         | 0.55 | 0.00 | 0.00 | 0.48 | 0.14 | 17 | Ciliated Cell |
| Ift20         | 0.73 | 0.00 | 0.00 | 0.63 | 0.25 | 17 | Ciliated Cell |
| Golgb1        | 0.75 | 0.00 | 0.00 | 0.74 | 0.32 | 17 | Ciliated Cell |
| Rfc2          | 0.54 | 0.00 | 0.00 | 0.33 | 0.08 | 17 | Ciliated Cell |
| Larp4b        | 0.59 | 0.00 | 0.00 | 0.49 | 0.15 | 17 | Ciliated Cell |
| Phf20l1       | 0.76 | 0.00 | 0.00 | 0.68 | 0.28 | 17 | Ciliated Cell |
| Prpf40b       | 0.40 | 0.00 | 0.00 | 0.27 | 0.05 | 17 | Ciliated Cell |
| Suclg1        | 0.68 | 0.00 | 0.00 | 0.58 | 0.21 | 17 | Ciliated Cell |
| Pcm1          | 0.70 | 0.00 | 0.00 | 0.66 | 0.26 | 17 | Ciliated Cell |

|               |      |      |      |      |      |    |               |
|---------------|------|------|------|------|------|----|---------------|
| Scgb1a1       | 2.48 | 0.00 | 0.00 | 0.71 | 0.35 | 17 | Ciliated Cell |
| Uhrf1bp1l     | 0.53 | 0.00 | 0.00 | 0.36 | 0.09 | 17 | Ciliated Cell |
| Sdc4          | 0.54 | 0.00 | 0.00 | 0.63 | 0.22 | 17 | Ciliated Cell |
| Chpt1         | 0.56 | 0.00 | 0.00 | 0.41 | 0.12 | 17 | Ciliated Cell |
| Ccdc34        | 0.66 | 0.00 | 0.00 | 0.44 | 0.13 | 17 | Ciliated Cell |
| Stip1         | 0.57 | 0.00 | 0.00 | 0.42 | 0.12 | 17 | Ciliated Cell |
| Ptpla         | 0.40 | 0.00 | 0.00 | 0.31 | 0.07 | 17 | Ciliated Cell |
| 0610011F06Rik | 0.37 | 0.00 | 0.00 | 0.28 | 0.06 | 17 | Ciliated Cell |
| Wdr13         | 0.39 | 0.00 | 0.00 | 0.26 | 0.06 | 17 | Ciliated Cell |
| Mpc1          | 0.57 | 0.00 | 0.00 | 0.48 | 0.15 | 17 | Ciliated Cell |
| Krcc1         | 0.59 | 0.00 | 0.00 | 0.58 | 0.21 | 17 | Ciliated Cell |
| Hes1          | 0.70 | 0.00 | 0.00 | 0.67 | 0.29 | 17 | Ciliated Cell |
| Sec23b        | 0.44 | 0.00 | 0.00 | 0.30 | 0.07 | 17 | Ciliated Cell |
| Lgals3        | 0.41 | 0.00 | 0.00 | 0.47 | 0.14 | 17 | Ciliated Cell |
| Smpdl3a       | 0.50 | 0.00 | 0.00 | 0.38 | 0.10 | 17 | Ciliated Cell |
| Rgs3          | 0.46 | 0.00 | 0.00 | 0.28 | 0.06 | 17 | Ciliated Cell |
| Gclc          | 0.54 | 0.00 | 0.00 | 0.33 | 0.08 | 17 | Ciliated Cell |
| 4930402H24Rik | 0.47 | 0.00 | 0.00 | 0.32 | 0.08 | 17 | Ciliated Cell |
| Otud7b        | 0.43 | 0.00 | 0.00 | 0.35 | 0.09 | 17 | Ciliated Cell |
| 8430429K09Rik | 0.40 | 0.00 | 0.00 | 0.27 | 0.06 | 17 | Ciliated Cell |
| Tspan2        | 0.52 | 0.00 | 0.00 | 0.40 | 0.12 | 17 | Ciliated Cell |
| Mea1          | 0.42 | 0.00 | 0.00 | 0.32 | 0.08 | 17 | Ciliated Cell |
| Cpne3         | 0.55 | 0.00 | 0.00 | 0.52 | 0.18 | 17 | Ciliated Cell |
| Tuba1c        | 0.73 | 0.00 | 0.00 | 0.70 | 0.32 | 17 | Ciliated Cell |
| Fam60a        | 0.38 | 0.00 | 0.00 | 0.30 | 0.07 | 17 | Ciliated Cell |
| Mecom         | 0.45 | 0.00 | 0.00 | 0.36 | 0.10 | 17 | Ciliated Cell |
| Adss          | 0.61 | 0.00 | 0.00 | 0.47 | 0.16 | 17 | Ciliated Cell |
| Psmc9         | 0.44 | 0.00 | 0.00 | 0.31 | 0.08 | 17 | Ciliated Cell |
| Insig2        | 0.49 | 0.00 | 0.00 | 0.36 | 0.10 | 17 | Ciliated Cell |
| Atp8a1        | 0.59 | 0.00 | 0.00 | 0.46 | 0.15 | 17 | Ciliated Cell |
| Rrp1          | 0.65 | 0.00 | 0.00 | 0.76 | 0.36 | 17 | Ciliated Cell |
| Setd8         | 0.48 | 0.00 | 0.00 | 0.38 | 0.11 | 17 | Ciliated Cell |
| Arl4a         | 0.48 | 0.00 | 0.00 | 0.38 | 0.11 | 17 | Ciliated Cell |
| Nagk          | 0.43 | 0.00 | 0.00 | 0.30 | 0.08 | 17 | Ciliated Cell |
| Ppp5c         | 0.42 | 0.00 | 0.00 | 0.29 | 0.07 | 17 | Ciliated Cell |
| Tuba1b        | 0.72 | 0.00 | 0.00 | 0.81 | 0.45 | 17 | Ciliated Cell |
| Gsr           | 0.30 | 0.00 | 0.00 | 0.33 | 0.09 | 17 | Ciliated Cell |
| Pcnt          | 0.52 | 0.00 | 0.00 | 0.43 | 0.14 | 17 | Ciliated Cell |
| Usp46         | 0.42 | 0.00 | 0.00 | 0.30 | 0.08 | 17 | Ciliated Cell |
| Nrbp2         | 0.39 | 0.00 | 0.00 | 0.25 | 0.06 | 17 | Ciliated Cell |
| Asph          | 0.36 | 0.00 | 0.00 | 0.26 | 0.06 | 17 | Ciliated Cell |
| Creld2        | 0.40 | 0.00 | 0.00 | 0.33 | 0.09 | 17 | Ciliated Cell |
| Bri3          | 0.59 | 0.00 | 0.00 | 0.54 | 0.20 | 17 | Ciliated Cell |

|         |      |      |      |      |      |    |               |
|---------|------|------|------|------|------|----|---------------|
| Etfa    | 0.57 | 0.00 | 0.00 | 0.47 | 0.16 | 17 | Ciliated Cell |
| Anxa4   | 0.43 | 0.00 | 0.00 | 0.34 | 0.09 | 17 | Ciliated Cell |
| Ppfibp2 | 0.46 | 0.00 | 0.00 | 0.25 | 0.06 | 17 | Ciliated Cell |
| Cep63   | 0.37 | 0.00 | 0.00 | 0.27 | 0.06 | 17 | Ciliated Cell |
| Rpap3   | 0.41 | 0.00 | 0.00 | 0.32 | 0.09 | 17 | Ciliated Cell |
| Rexo2   | 0.48 | 0.00 | 0.00 | 0.44 | 0.14 | 17 | Ciliated Cell |
| Hint2   | 0.44 | 0.00 | 0.00 | 0.36 | 0.10 | 17 | Ciliated Cell |
| Ift52   | 0.37 | 0.00 | 0.00 | 0.27 | 0.06 | 17 | Ciliated Cell |
| Gkap1   | 0.46 | 0.00 | 0.00 | 0.39 | 0.12 | 17 | Ciliated Cell |
| Naa35   | 0.43 | 0.00 | 0.00 | 0.35 | 0.10 | 17 | Ciliated Cell |
| Usp6nl  | 0.37 | 0.00 | 0.00 | 0.26 | 0.06 | 17 | Ciliated Cell |
| Dynll2  | 0.49 | 0.00 | 0.00 | 0.38 | 0.12 | 17 | Ciliated Cell |
| Paip2   | 0.61 | 0.00 | 0.00 | 0.73 | 0.36 | 17 | Ciliated Cell |
| Cyb5    | 0.63 | 0.00 | 0.00 | 0.60 | 0.26 | 17 | Ciliated Cell |
| Tomm7   | 0.66 | 0.00 | 0.00 | 0.71 | 0.37 | 17 | Ciliated Cell |
| Fth1    | 0.36 | 0.00 | 0.00 | 0.97 | 0.81 | 17 | Ciliated Cell |
| Plp2    | 0.43 | 0.00 | 0.00 | 0.40 | 0.13 | 17 | Ciliated Cell |
| Bbip1   | 0.45 | 0.00 | 0.00 | 0.37 | 0.11 | 17 | Ciliated Cell |
| Bag1    | 0.60 | 0.00 | 0.00 | 0.57 | 0.23 | 17 | Ciliated Cell |
| Cyth2   | 0.41 | 0.00 | 0.00 | 0.33 | 0.09 | 17 | Ciliated Cell |
| Pltp    | 0.47 | 0.00 | 0.00 | 0.50 | 0.18 | 17 | Ciliated Cell |
| Tns3    | 0.39 | 0.00 | 0.00 | 0.36 | 0.11 | 17 | Ciliated Cell |
| Gns     | 0.45 | 0.00 | 0.00 | 0.39 | 0.12 | 17 | Ciliated Cell |
| Thap3   | 0.43 | 0.00 | 0.00 | 0.31 | 0.08 | 17 | Ciliated Cell |
| Hltf    | 0.38 | 0.00 | 0.00 | 0.27 | 0.07 | 17 | Ciliated Cell |
| Tcp11l2 | 0.36 | 0.00 | 0.00 | 0.28 | 0.07 | 17 | Ciliated Cell |
| Lpgat1  | 0.45 | 0.00 | 0.00 | 0.31 | 0.09 | 17 | Ciliated Cell |
| Txnip   | 0.56 | 0.00 | 0.00 | 0.60 | 0.25 | 17 | Ciliated Cell |
| Galk1   | 0.27 | 0.00 | 0.00 | 0.25 | 0.06 | 17 | Ciliated Cell |
| Nav2    | 0.43 | 0.00 | 0.00 | 0.30 | 0.08 | 17 | Ciliated Cell |
| Casp6   | 0.41 | 0.00 | 0.00 | 0.28 | 0.07 | 17 | Ciliated Cell |
| Sec14l1 | 0.50 | 0.00 | 0.00 | 0.38 | 0.12 | 17 | Ciliated Cell |
| Carkd   | 0.48 | 0.00 | 0.00 | 0.44 | 0.15 | 17 | Ciliated Cell |
| Nmt2    | 0.46 | 0.00 | 0.00 | 0.33 | 0.10 | 17 | Ciliated Cell |
| Pigp    | 0.40 | 0.00 | 0.00 | 0.34 | 0.10 | 17 | Ciliated Cell |
| Psmc10  | 0.33 | 0.00 | 0.00 | 0.28 | 0.07 | 17 | Ciliated Cell |
| Gm6169  | 0.39 | 0.00 | 0.00 | 0.38 | 0.12 | 17 | Ciliated Cell |
| Gtf2b   | 0.44 | 0.00 | 0.00 | 0.34 | 0.10 | 17 | Ciliated Cell |
| H3f3b   | 0.44 | 0.00 | 0.00 | 0.98 | 0.89 | 17 | Ciliated Cell |
| Scand1  | 0.47 | 0.00 | 0.00 | 0.44 | 0.16 | 17 | Ciliated Cell |
| Tubgcp3 | 0.35 | 0.00 | 0.00 | 0.28 | 0.08 | 17 | Ciliated Cell |
| Atp6v1d | 0.42 | 0.00 | 0.00 | 0.46 | 0.16 | 17 | Ciliated Cell |
| Rock1   | 0.58 | 0.00 | 0.00 | 0.70 | 0.34 | 17 | Ciliated Cell |

|               |      |      |      |      |      |    |               |
|---------------|------|------|------|------|------|----|---------------|
| Impad1        | 0.49 | 0.00 | 0.00 | 0.42 | 0.15 | 17 | Ciliated Cell |
| Cct7          | 0.50 | 0.00 | 0.00 | 0.51 | 0.20 | 17 | Ciliated Cell |
| Car8          | 0.31 | 0.00 | 0.00 | 0.28 | 0.08 | 17 | Ciliated Cell |
| Pcyt1a        | 0.40 | 0.00 | 0.00 | 0.34 | 0.11 | 17 | Ciliated Cell |
| Tmem176a      | 0.51 | 0.00 | 0.00 | 0.51 | 0.20 | 17 | Ciliated Cell |
| Arhgap5       | 0.48 | 0.00 | 0.00 | 0.48 | 0.19 | 17 | Ciliated Cell |
| Siva1         | 0.50 | 0.00 | 0.00 | 0.41 | 0.14 | 17 | Ciliated Cell |
| Eif1a         | 0.49 | 0.00 | 0.00 | 0.41 | 0.14 | 17 | Ciliated Cell |
| Hopx          | 0.25 | 0.00 | 0.00 | 0.33 | 0.10 | 17 | Ciliated Cell |
| Naga          | 0.33 | 0.00 | 0.00 | 0.26 | 0.07 | 17 | Ciliated Cell |
| Dhrs3         | 0.34 | 0.00 | 0.00 | 0.25 | 0.07 | 17 | Ciliated Cell |
| Magi3         | 0.37 | 0.00 | 0.00 | 0.35 | 0.11 | 17 | Ciliated Cell |
| 2510002D24Rik | 0.39 | 0.00 | 0.00 | 0.29 | 0.08 | 17 | Ciliated Cell |
| Ercc6l2       | 0.34 | 0.00 | 0.00 | 0.28 | 0.08 | 17 | Ciliated Cell |
| Usp19         | 0.33 | 0.00 | 0.00 | 0.26 | 0.07 | 17 | Ciliated Cell |
| Nrbf2         | 0.34 | 0.00 | 0.00 | 0.29 | 0.08 | 17 | Ciliated Cell |
| Selenbp1      | 0.62 | 0.00 | 0.00 | 0.54 | 0.22 | 17 | Ciliated Cell |
| Ttf1          | 0.37 | 0.00 | 0.00 | 0.32 | 0.10 | 17 | Ciliated Cell |
| Zc3h14        | 0.32 | 0.00 | 0.00 | 0.28 | 0.08 | 17 | Ciliated Cell |
| Abr           | 0.28 | 0.00 | 0.00 | 0.27 | 0.07 | 17 | Ciliated Cell |
| Fam98b        | 0.36 | 0.00 | 0.00 | 0.32 | 0.10 | 17 | Ciliated Cell |
| Prdx5         | 0.45 | 0.00 | 0.00 | 0.68 | 0.32 | 17 | Ciliated Cell |
| Vamp8         | 0.52 | 0.00 | 0.00 | 0.69 | 0.34 | 17 | Ciliated Cell |
| Churc1        | 0.40 | 0.00 | 0.00 | 0.39 | 0.14 | 17 | Ciliated Cell |
| Ndufab1       | 0.45 | 0.00 | 0.00 | 0.48 | 0.19 | 17 | Ciliated Cell |
| Med1          | 0.36 | 0.00 | 0.00 | 0.30 | 0.09 | 17 | Ciliated Cell |
| Rnase4        | 0.43 | 0.00 | 0.00 | 0.48 | 0.18 | 17 | Ciliated Cell |
| Ube2b         | 0.53 | 0.00 | 0.00 | 0.70 | 0.36 | 17 | Ciliated Cell |
| Hirip3        | 0.38 | 0.00 | 0.00 | 0.29 | 0.09 | 17 | Ciliated Cell |
| Glrx5         | 0.42 | 0.00 | 0.00 | 0.39 | 0.14 | 17 | Ciliated Cell |
| Laptm4b       | 0.32 | 0.00 | 0.00 | 0.27 | 0.08 | 17 | Ciliated Cell |
| Clip1         | 0.48 | 0.00 | 0.00 | 0.50 | 0.20 | 17 | Ciliated Cell |
| Lrrfip2       | 0.42 | 0.00 | 0.00 | 0.39 | 0.14 | 17 | Ciliated Cell |
| Upf3b         | 0.44 | 0.00 | 0.00 | 0.46 | 0.18 | 17 | Ciliated Cell |
| Lpin2         | 0.46 | 0.00 | 0.00 | 0.40 | 0.15 | 17 | Ciliated Cell |
| Arl4c         | 0.42 | 0.00 | 0.00 | 0.32 | 0.10 | 17 | Ciliated Cell |
| Commd2        | 0.37 | 0.00 | 0.00 | 0.32 | 0.10 | 17 | Ciliated Cell |
| Nfe2l2        | 0.45 | 0.00 | 0.00 | 0.57 | 0.25 | 17 | Ciliated Cell |
| Flot1         | 0.31 | 0.00 | 0.00 | 0.25 | 0.07 | 17 | Ciliated Cell |
| Coa6          | 0.33 | 0.00 | 0.00 | 0.26 | 0.07 | 17 | Ciliated Cell |
| Dstn          | 0.49 | 0.00 | 0.00 | 0.81 | 0.50 | 17 | Ciliated Cell |
| Dapk1         | 0.36 | 0.00 | 0.00 | 0.33 | 0.11 | 17 | Ciliated Cell |
| Gabarapl1     | 0.38 | 0.00 | 0.00 | 0.42 | 0.15 | 17 | Ciliated Cell |

|           |      |      |      |      |      |    |               |
|-----------|------|------|------|------|------|----|---------------|
| Actn1     | 0.47 | 0.00 | 0.00 | 0.52 | 0.22 | 17 | Ciliated Cell |
| Rnh1      | 0.40 | 0.00 | 0.00 | 0.41 | 0.15 | 17 | Ciliated Cell |
| Idh3a     | 0.33 | 0.00 | 0.00 | 0.25 | 0.07 | 17 | Ciliated Cell |
| Fip1l1    | 0.41 | 0.00 | 0.00 | 0.46 | 0.18 | 17 | Ciliated Cell |
| Slc25a5   | 0.53 | 0.00 | 0.00 | 0.86 | 0.59 | 17 | Ciliated Cell |
| Sdhb      | 0.41 | 0.00 | 0.00 | 0.44 | 0.17 | 17 | Ciliated Cell |
| Lin7c     | 0.38 | 0.00 | 0.00 | 0.32 | 0.10 | 17 | Ciliated Cell |
| Tmem64    | 0.42 | 0.00 | 0.00 | 0.32 | 0.10 | 17 | Ciliated Cell |
| Stk11     | 0.36 | 0.00 | 0.00 | 0.30 | 0.10 | 17 | Ciliated Cell |
| Acadm     | 0.33 | 0.00 | 0.00 | 0.38 | 0.14 | 17 | Ciliated Cell |
| Cryz1     | 0.33 | 0.00 | 0.00 | 0.26 | 0.08 | 17 | Ciliated Cell |
| Iqgap1    | 0.51 | 0.00 | 0.00 | 0.77 | 0.45 | 17 | Ciliated Cell |
| Psmc6     | 0.49 | 0.00 | 0.00 | 0.65 | 0.33 | 17 | Ciliated Cell |
| Ttc14     | 0.46 | 0.00 | 0.00 | 0.48 | 0.20 | 17 | Ciliated Cell |
| Adipor2   | 0.33 | 0.00 | 0.00 | 0.34 | 0.11 | 17 | Ciliated Cell |
| Mrpl40    | 0.31 | 0.00 | 0.00 | 0.32 | 0.11 | 17 | Ciliated Cell |
| Sudc3     | 0.33 | 0.00 | 0.00 | 0.26 | 0.08 | 17 | Ciliated Cell |
| Rnf181    | 0.39 | 0.00 | 0.00 | 0.35 | 0.12 | 17 | Ciliated Cell |
| Trp53inp1 | 0.25 | 0.00 | 0.00 | 0.26 | 0.08 | 17 | Ciliated Cell |
| Dhx40     | 0.32 | 0.00 | 0.00 | 0.34 | 0.11 | 17 | Ciliated Cell |
| Usmg5     | 0.54 | 0.00 | 0.00 | 0.71 | 0.40 | 17 | Ciliated Cell |
| Ccdc66    | 0.33 | 0.00 | 0.00 | 0.29 | 0.09 | 17 | Ciliated Cell |
| Il10rb    | 0.31 | 0.00 | 0.00 | 0.28 | 0.09 | 17 | Ciliated Cell |
| Sh3d19    | 0.35 | 0.00 | 0.00 | 0.29 | 0.09 | 17 | Ciliated Cell |
| Pkp4      | 0.31 | 0.00 | 0.00 | 0.27 | 0.08 | 17 | Ciliated Cell |
| Arl6ip1   | 0.43 | 0.00 | 0.00 | 0.82 | 0.52 | 17 | Ciliated Cell |
| Btf3l4    | 0.36 | 0.00 | 0.00 | 0.36 | 0.13 | 17 | Ciliated Cell |
| Atxn10    | 0.44 | 0.00 | 0.00 | 0.46 | 0.19 | 17 | Ciliated Cell |
| Pdlim1    | 0.34 | 0.00 | 0.00 | 0.38 | 0.14 | 17 | Ciliated Cell |
| Iars2     | 0.33 | 0.00 | 0.00 | 0.29 | 0.09 | 17 | Ciliated Cell |
| Atp6v1a   | 0.44 | 0.00 | 0.00 | 0.58 | 0.27 | 17 | Ciliated Cell |
| Selenbp2  | 0.53 | 0.00 | 0.00 | 0.42 | 0.16 | 17 | Ciliated Cell |
| Trip4     | 0.25 | 0.00 | 0.00 | 0.25 | 0.07 | 17 | Ciliated Cell |
| Tmem176b  | 0.45 | 0.00 | 0.00 | 0.66 | 0.34 | 17 | Ciliated Cell |
| Nin       | 0.30 | 0.00 | 0.00 | 0.38 | 0.14 | 17 | Ciliated Cell |
| Rnf5      | 0.32 | 0.00 | 0.00 | 0.30 | 0.10 | 17 | Ciliated Cell |
| Cep110    | 0.36 | 0.00 | 0.00 | 0.45 | 0.18 | 17 | Ciliated Cell |
| Slain2    | 0.38 | 0.00 | 0.00 | 0.29 | 0.09 | 17 | Ciliated Cell |
| Gstp1     | 0.45 | 0.00 | 0.00 | 0.46 | 0.19 | 17 | Ciliated Cell |
| Arid2     | 0.39 | 0.00 | 0.00 | 0.42 | 0.17 | 17 | Ciliated Cell |
| Dnajc1    | 0.40 | 0.00 | 0.00 | 0.42 | 0.17 | 17 | Ciliated Cell |
| Snapi     | 0.34 | 0.00 | 0.00 | 0.33 | 0.11 | 17 | Ciliated Cell |
| AU019823  | 0.32 | 0.00 | 0.00 | 0.27 | 0.09 | 17 | Ciliated Cell |

|           |      |      |      |      |      |    |               |
|-----------|------|------|------|------|------|----|---------------|
| Tmem50b   | 0.31 | 0.00 | 0.00 | 0.26 | 0.08 | 17 | Ciliated Cell |
| Swi5      | 0.52 | 0.00 | 0.00 | 0.55 | 0.26 | 17 | Ciliated Cell |
| Slc31a1   | 0.34 | 0.00 | 0.00 | 0.32 | 0.11 | 17 | Ciliated Cell |
| Prkx      | 0.35 | 0.00 | 0.00 | 0.32 | 0.11 | 17 | Ciliated Cell |
| Plekha1   | 0.28 | 0.00 | 0.00 | 0.33 | 0.11 | 17 | Ciliated Cell |
| Nelfb     | 0.33 | 0.00 | 0.00 | 0.37 | 0.14 | 17 | Ciliated Cell |
| Zfp608    | 0.30 | 0.00 | 0.00 | 0.38 | 0.14 | 17 | Ciliated Cell |
| Tpd52l2   | 0.40 | 0.00 | 0.00 | 0.43 | 0.18 | 17 | Ciliated Cell |
| Gabarapl2 | 0.38 | 0.00 | 0.00 | 0.50 | 0.22 | 17 | Ciliated Cell |
| Ppa2      | 0.30 | 0.00 | 0.00 | 0.30 | 0.10 | 17 | Ciliated Cell |
| Acaa1a    | 0.33 | 0.00 | 0.00 | 0.41 | 0.16 | 17 | Ciliated Cell |
| Hibadh    | 0.34 | 0.00 | 0.00 | 0.31 | 0.11 | 17 | Ciliated Cell |
| Sod1      | 0.53 | 0.00 | 0.00 | 0.75 | 0.47 | 17 | Ciliated Cell |
| Nhp2      | 0.36 | 0.00 | 0.00 | 0.32 | 0.11 | 17 | Ciliated Cell |
| Tpi1      | 0.35 | 0.00 | 0.00 | 0.39 | 0.15 | 17 | Ciliated Cell |
| Kdm1a     | 0.35 | 0.00 | 0.00 | 0.37 | 0.14 | 17 | Ciliated Cell |
| Fam129b   | 0.32 | 0.00 | 0.00 | 0.25 | 0.08 | 17 | Ciliated Cell |
| Chd4      | 0.48 | 0.00 | 0.00 | 0.78 | 0.48 | 17 | Ciliated Cell |
| Rev3l     | 0.28 | 0.00 | 0.00 | 0.32 | 0.11 | 17 | Ciliated Cell |
| Ergic3    | 0.32 | 0.00 | 0.00 | 0.39 | 0.15 | 17 | Ciliated Cell |
| Zfp704    | 0.35 | 0.00 | 0.00 | 0.34 | 0.12 | 17 | Ciliated Cell |
| Dock9     | 0.31 | 0.00 | 0.00 | 0.28 | 0.09 | 17 | Ciliated Cell |
| Eci1      | 0.33 | 0.00 | 0.00 | 0.25 | 0.08 | 17 | Ciliated Cell |
| Atp2a2    | 0.39 | 0.00 | 0.00 | 0.35 | 0.13 | 17 | Ciliated Cell |
| Tagln2    | 0.46 | 0.00 | 0.00 | 0.76 | 0.44 | 17 | Ciliated Cell |
| Sf3b2     | 0.47 | 0.00 | 0.00 | 0.70 | 0.39 | 17 | Ciliated Cell |
| Pls3      | 0.49 | 0.00 | 0.00 | 0.45 | 0.20 | 17 | Ciliated Cell |
| Sms       | 0.33 | 0.00 | 0.00 | 0.32 | 0.11 | 17 | Ciliated Cell |
| Fdx1      | 0.33 | 0.00 | 0.00 | 0.36 | 0.14 | 17 | Ciliated Cell |
| Tmx1      | 0.29 | 0.00 | 0.00 | 0.29 | 0.10 | 17 | Ciliated Cell |
| Sys1      | 0.31 | 0.00 | 0.00 | 0.37 | 0.14 | 17 | Ciliated Cell |
| Aco2      | 0.32 | 0.00 | 0.00 | 0.39 | 0.15 | 17 | Ciliated Cell |
| Eif4g3    | 0.39 | 0.00 | 0.00 | 0.56 | 0.27 | 17 | Ciliated Cell |
| Syne2     | 0.28 | 0.00 | 0.00 | 0.37 | 0.14 | 17 | Ciliated Cell |
| Prdx6     | 0.48 | 0.00 | 0.00 | 0.55 | 0.27 | 17 | Ciliated Cell |
| Cops5     | 0.28 | 0.00 | 0.00 | 0.36 | 0.14 | 17 | Ciliated Cell |
| Bnip3     | 0.26 | 0.00 | 0.00 | 0.26 | 0.08 | 17 | Ciliated Cell |
| Vamp5     | 0.27 | 0.00 | 0.00 | 0.28 | 0.09 | 17 | Ciliated Cell |
| Ubn2      | 0.35 | 0.00 | 0.00 | 0.39 | 0.16 | 17 | Ciliated Cell |
| Clcn3     | 0.29 | 0.00 | 0.00 | 0.28 | 0.09 | 17 | Ciliated Cell |
| Tspan3    | 0.29 | 0.00 | 0.00 | 0.39 | 0.15 | 17 | Ciliated Cell |
| Cct4      | 0.41 | 0.00 | 0.00 | 0.49 | 0.22 | 17 | Ciliated Cell |
| Ctnnb1    | 0.47 | 0.00 | 0.00 | 0.65 | 0.34 | 17 | Ciliated Cell |

|               |      |      |      |      |      |    |               |
|---------------|------|------|------|------|------|----|---------------|
| Aftph         | 0.26 | 0.00 | 0.00 | 0.29 | 0.10 | 17 | Ciliated Cell |
| Nupr1         | 0.62 | 0.00 | 0.00 | 0.41 | 0.18 | 17 | Ciliated Cell |
| 1810009A15Rik | 0.28 | 0.00 | 0.00 | 0.35 | 0.13 | 17 | Ciliated Cell |
| 1110058L19Rik | 0.25 | 0.00 | 0.00 | 0.25 | 0.08 | 17 | Ciliated Cell |
| Gstp2         | 0.37 | 0.00 | 0.00 | 0.41 | 0.17 | 17 | Ciliated Cell |
| Prdx1         | 0.44 | 0.00 | 0.00 | 0.77 | 0.50 | 17 | Ciliated Cell |
| Cep57         | 0.35 | 0.00 | 0.00 | 0.30 | 0.11 | 17 | Ciliated Cell |
| Gclm          | 0.41 | 0.00 | 0.00 | 0.72 | 0.41 | 17 | Ciliated Cell |
| Calm3         | 0.33 | 0.00 | 0.00 | 0.45 | 0.19 | 17 | Ciliated Cell |
| Tsc22d1       | 0.35 | 0.00 | 0.00 | 0.64 | 0.33 | 17 | Ciliated Cell |
| Pi4k2b        | 0.26 | 0.00 | 0.00 | 0.28 | 0.10 | 17 | Ciliated Cell |
| Pole3         | 0.32 | 0.00 | 0.00 | 0.29 | 0.10 | 17 | Ciliated Cell |
| Crip1         | 0.31 | 0.00 | 0.00 | 0.80 | 0.47 | 17 | Ciliated Cell |
| Gm9803        | 0.29 | 0.00 | 0.00 | 0.27 | 0.09 | 17 | Ciliated Cell |
| Ak3           | 0.28 | 0.00 | 0.00 | 0.28 | 0.10 | 17 | Ciliated Cell |
| Qsox1         | 0.26 | 0.00 | 0.00 | 0.28 | 0.10 | 17 | Ciliated Cell |
| Bcap31        | 0.32 | 0.00 | 0.00 | 0.47 | 0.21 | 17 | Ciliated Cell |
| Phf3          | 0.36 | 0.00 | 0.00 | 0.52 | 0.24 | 17 | Ciliated Cell |
| Tspo          | 0.34 | 0.00 | 0.00 | 0.53 | 0.25 | 17 | Ciliated Cell |
| Shfm1         | 0.41 | 0.00 | 0.00 | 0.86 | 0.64 | 17 | Ciliated Cell |
| Mtus1         | 0.29 | 0.00 | 0.00 | 0.41 | 0.17 | 17 | Ciliated Cell |
| Rpn2          | 0.34 | 0.00 | 0.00 | 0.46 | 0.20 | 17 | Ciliated Cell |
| Sri           | 0.37 | 0.00 | 0.00 | 0.56 | 0.27 | 17 | Ciliated Cell |
| Emc4          | 0.28 | 0.00 | 0.00 | 0.35 | 0.14 | 17 | Ciliated Cell |
| Txn1          | 0.45 | 0.00 | 0.00 | 0.77 | 0.49 | 17 | Ciliated Cell |
| Mrps6         | 0.30 | 0.00 | 0.00 | 0.29 | 0.11 | 17 | Ciliated Cell |
| Gng5          | 0.42 | 0.00 | 0.00 | 0.73 | 0.45 | 17 | Ciliated Cell |
| BC031181      | 0.25 | 0.00 | 0.00 | 0.35 | 0.14 | 17 | Ciliated Cell |
| Ier5          | 0.26 | 0.00 | 0.00 | 0.25 | 0.08 | 17 | Ciliated Cell |
| Golga4        | 0.33 | 0.00 | 0.00 | 0.59 | 0.29 | 17 | Ciliated Cell |
| Acat1         | 0.35 | 0.00 | 0.00 | 0.41 | 0.18 | 17 | Ciliated Cell |
| Cntln         | 0.27 | 0.00 | 0.00 | 0.31 | 0.12 | 17 | Ciliated Cell |
| Cstb          | 0.25 | 0.00 | 0.00 | 0.55 | 0.27 | 17 | Ciliated Cell |
| Mdh1          | 0.28 | 0.00 | 0.00 | 0.43 | 0.19 | 17 | Ciliated Cell |
| Vps28         | 0.34 | 0.00 | 0.00 | 0.41 | 0.18 | 17 | Ciliated Cell |
| Hsbp1         | 0.36 | 0.00 | 0.00 | 0.59 | 0.31 | 17 | Ciliated Cell |
| Fnta          | 0.27 | 0.00 | 0.00 | 0.31 | 0.12 | 17 | Ciliated Cell |
| Diablo        | 0.26 | 0.00 | 0.00 | 0.27 | 0.10 | 17 | Ciliated Cell |
| Srpk2         | 0.27 | 0.00 | 0.00 | 0.38 | 0.16 | 17 | Ciliated Cell |
| Tmem179b      | 0.25 | 0.00 | 0.00 | 0.30 | 0.11 | 17 | Ciliated Cell |
| Anapc13       | 0.31 | 0.00 | 0.00 | 0.46 | 0.21 | 17 | Ciliated Cell |
| Efr3a         | 0.29 | 0.00 | 0.00 | 0.32 | 0.12 | 17 | Ciliated Cell |
| Dnaja2        | 0.32 | 0.00 | 0.00 | 0.52 | 0.25 | 17 | Ciliated Cell |

|               |      |      |      |      |      |    |               |
|---------------|------|------|------|------|------|----|---------------|
| Gm3150        | 0.33 | 0.00 | 0.00 | 0.38 | 0.16 | 17 | Ciliated Cell |
| Ddx26b        | 0.29 | 0.00 | 0.00 | 0.34 | 0.14 | 17 | Ciliated Cell |
| Serf1         | 0.28 | 0.00 | 0.00 | 0.28 | 0.11 | 17 | Ciliated Cell |
| Ppp1cb        | 0.30 | 0.00 | 0.00 | 0.43 | 0.19 | 17 | Ciliated Cell |
| Polr2i        | 0.27 | 0.00 | 0.00 | 0.36 | 0.15 | 17 | Ciliated Cell |
| Mbip          | 0.26 | 0.00 | 0.00 | 0.30 | 0.11 | 17 | Ciliated Cell |
| Man1a2        | 0.30 | 0.00 | 0.00 | 0.36 | 0.15 | 17 | Ciliated Cell |
| Rin2          | 0.27 | 0.00 | 0.00 | 0.36 | 0.15 | 17 | Ciliated Cell |
| Arid4b        | 0.34 | 0.00 | 0.00 | 0.61 | 0.33 | 17 | Ciliated Cell |
| Upf2          | 0.27 | 0.00 | 0.00 | 0.35 | 0.15 | 17 | Ciliated Cell |
| Cab39         | 0.27 | 0.00 | 0.00 | 0.38 | 0.16 | 17 | Ciliated Cell |
| Ngfrap1       | 0.31 | 0.00 | 0.00 | 0.48 | 0.23 | 17 | Ciliated Cell |
| 9530068E07Rik | 0.28 | 0.00 | 0.00 | 0.39 | 0.17 | 17 | Ciliated Cell |
| Bsg           | 0.38 | 0.00 | 0.00 | 0.62 | 0.36 | 17 | Ciliated Cell |
| Usp47         | 0.27 | 0.00 | 0.00 | 0.31 | 0.12 | 17 | Ciliated Cell |
| F11r          | 0.25 | 0.00 | 0.00 | 0.38 | 0.16 | 17 | Ciliated Cell |
| Dctn3         | 0.25 | 0.00 | 0.00 | 0.39 | 0.17 | 17 | Ciliated Cell |
| Knop1         | 0.27 | 0.00 | 0.00 | 0.38 | 0.17 | 17 | Ciliated Cell |
| Pcmt1         | 0.28 | 0.00 | 0.00 | 0.42 | 0.19 | 17 | Ciliated Cell |
| Atp11a        | 0.29 | 0.00 | 0.00 | 0.29 | 0.11 | 17 | Ciliated Cell |
| Rif1          | 0.26 | 0.00 | 0.00 | 0.38 | 0.16 | 17 | Ciliated Cell |
| Ndufb5        | 0.33 | 0.00 | 0.00 | 0.47 | 0.23 | 17 | Ciliated Cell |
| Hcfc1r1       | 0.28 | 0.00 | 0.00 | 0.34 | 0.14 | 17 | Ciliated Cell |
| Papola        | 0.27 | 0.00 | 0.00 | 0.48 | 0.23 | 17 | Ciliated Cell |
| Tmbim6        | 0.33 | 0.00 | 0.00 | 0.66 | 0.37 | 17 | Ciliated Cell |
| Erdr1         | 0.25 | 0.00 | 0.00 | 0.25 | 0.09 | 17 | Ciliated Cell |
| Ptov1         | 0.27 | 0.00 | 0.00 | 0.34 | 0.14 | 17 | Ciliated Cell |
| Gorasp2       | 0.26 | 0.00 | 0.00 | 0.28 | 0.11 | 17 | Ciliated Cell |
| Skp1a         | 0.37 | 0.00 | 0.00 | 0.67 | 0.40 | 17 | Ciliated Cell |
| 2-Mar         | 0.27 | 0.00 | 0.00 | 0.32 | 0.13 | 17 | Ciliated Cell |
| Dnajb6        | 0.32 | 0.00 | 0.00 | 0.52 | 0.26 | 17 | Ciliated Cell |
| Eif3c         | 0.37 | 0.00 | 0.00 | 0.74 | 0.47 | 17 | Ciliated Cell |
| Arhgef2       | 0.29 | 0.00 | 0.00 | 0.43 | 0.20 | 17 | Ciliated Cell |
| 4930523C07Rik | 0.25 | 0.00 | 0.00 | 0.40 | 0.18 | 17 | Ciliated Cell |
| Wbp11         | 0.27 | 0.00 | 0.00 | 0.48 | 0.24 | 17 | Ciliated Cell |
| Morf4l2       | 0.26 | 0.00 | 0.00 | 0.46 | 0.22 | 17 | Ciliated Cell |
| Gtf2i         | 0.27 | 0.00 | 0.00 | 0.37 | 0.17 | 17 | Ciliated Cell |
| Hmgb3         | 0.26 | 0.00 | 0.00 | 0.33 | 0.14 | 17 | Ciliated Cell |
| Atg12         | 0.26 | 0.00 | 0.00 | 0.26 | 0.10 | 17 | Ciliated Cell |
| Dad1          | 0.35 | 0.00 | 0.00 | 0.62 | 0.36 | 17 | Ciliated Cell |
| Dhrs7         | 0.27 | 0.00 | 0.00 | 0.35 | 0.16 | 17 | Ciliated Cell |
| Spcs1         | 0.30 | 0.00 | 0.00 | 0.55 | 0.29 | 17 | Ciliated Cell |
| Hint1         | 0.33 | 0.00 | 0.00 | 0.73 | 0.46 | 17 | Ciliated Cell |

|          |      |      |      |      |      |    |                   |
|----------|------|------|------|------|------|----|-------------------|
| Hprt     | 0.25 | 0.00 | 0.00 | 0.31 | 0.13 | 17 | Ciliated Cell     |
| Srp14    | 0.27 | 0.00 | 0.00 | 0.55 | 0.29 | 17 | Ciliated Cell     |
| Cox6c    | 0.34 | 0.00 | 0.00 | 0.85 | 0.65 | 17 | Ciliated Cell     |
| Cetn3    | 0.29 | 0.00 | 0.00 | 0.57 | 0.31 | 17 | Ciliated Cell     |
| Ywhae    | 0.34 | 0.00 | 0.00 | 0.79 | 0.54 | 17 | Ciliated Cell     |
| Wbp5     | 0.35 | 0.00 | 0.00 | 0.73 | 0.48 | 17 | Ciliated Cell     |
| Mtpn     | 0.26 | 0.00 | 0.00 | 0.51 | 0.27 | 17 | Ciliated Cell     |
| Dync1i2  | 0.32 | 0.00 | 0.00 | 0.75 | 0.48 | 17 | Ciliated Cell     |
| Acaa2    | 0.27 | 0.00 | 0.00 | 0.35 | 0.16 | 17 | Ciliated Cell     |
| Azin1    | 0.26 | 0.00 | 0.00 | 0.30 | 0.13 | 17 | Ciliated Cell     |
| Ldha     | 0.25 | 0.00 | 0.00 | 0.54 | 0.29 | 17 | Ciliated Cell     |
| Calm2    | 0.29 | 0.00 | 0.00 | 0.88 | 0.64 | 17 | Ciliated Cell     |
| Ubb      | 0.29 | 0.00 | 0.00 | 0.92 | 0.81 | 17 | Ciliated Cell     |
| Usp34    | 0.27 | 0.00 | 0.00 | 0.47 | 0.25 | 17 | Ciliated Cell     |
| Gpx4     | 0.31 | 0.00 | 0.00 | 0.61 | 0.37 | 17 | Ciliated Cell     |
| mt-Co1   | 0.27 | 0.00 | 0.00 | 0.98 | 0.95 | 17 | Ciliated Cell     |
| mt-Cytb  | 0.29 | 0.00 | 0.00 | 0.93 | 0.82 | 17 | Ciliated Cell     |
| Senp6    | 0.26 | 0.00 | 0.00 | 0.57 | 0.33 | 17 | Ciliated Cell     |
| Ktn1     | 0.26 | 0.00 | 0.00 | 0.63 | 0.38 | 17 | Ciliated Cell     |
| Gm10222  | 0.28 | 0.00 | 0.00 | 0.67 | 0.43 | 17 | Ciliated Cell     |
| Atp5g3   | 0.26 | 0.00 | 0.00 | 0.60 | 0.36 | 17 | Ciliated Cell     |
| mt-Nd4l  | 0.25 | 0.00 | 0.00 | 0.61 | 0.38 | 17 | Ciliated Cell     |
| mt-Nd4   | 0.28 | 0.00 | 0.00 | 0.89 | 0.75 | 17 | Ciliated Cell     |
| Dbi      | 0.26 | 0.00 | 0.00 | 0.56 | 0.37 | 17 | Ciliated Cell     |
| mt-Nd5   | 0.28 | 0.00 | 0.00 | 0.88 | 0.75 | 17 | Ciliated Cell     |
| Gucy1a3  | 3.27 | 0.00 | 0.00 | 0.94 | 0.08 | 18 | Matrix Fibroblast |
| Postn    | 2.90 | 0.00 | 0.00 | 0.90 | 0.07 | 18 | Matrix Fibroblast |
| Gucy1b3  | 2.72 | 0.00 | 0.00 | 0.81 | 0.04 | 18 | Matrix Fibroblast |
| Higd1b   | 2.59 | 0.00 | 0.00 | 0.70 | 0.01 | 18 | Matrix Fibroblast |
| Cox4i2   | 2.34 | 0.00 | 0.00 | 0.71 | 0.01 | 18 | Matrix Fibroblast |
| Pdgfrb   | 2.19 | 0.00 | 0.00 | 0.71 | 0.03 | 18 | Matrix Fibroblast |
| Itm2a    | 2.18 | 0.00 | 0.00 | 0.60 | 0.06 | 18 | Matrix Fibroblast |
| Pcdh18   | 2.04 | 0.00 | 0.00 | 0.56 | 0.03 | 18 | Matrix Fibroblast |
| Pde5a    | 2.01 | 0.00 | 0.00 | 0.68 | 0.11 | 18 | Matrix Fibroblast |
| Rgs5     | 1.86 | 0.00 | 0.00 | 0.45 | 0.03 | 18 | Matrix Fibroblast |
| Itga1    | 1.86 | 0.00 | 0.00 | 0.60 | 0.09 | 18 | Matrix Fibroblast |
| Pdzd2    | 1.83 | 0.00 | 0.00 | 0.50 | 0.02 | 18 | Matrix Fibroblast |
| Cdh2     | 1.82 | 0.00 | 0.00 | 0.51 | 0.01 | 18 | Matrix Fibroblast |
| Sparcl1  | 1.76 | 0.00 | 0.00 | 0.94 | 0.38 | 18 | Matrix Fibroblast |
| Lipg     | 1.70 | 0.00 | 0.00 | 0.40 | 0.01 | 18 | Matrix Fibroblast |
| Mfge8    | 1.70 | 0.00 | 0.00 | 0.69 | 0.15 | 18 | Matrix Fibroblast |
| Hbegf    | 1.69 | 0.00 | 0.00 | 0.52 | 0.05 | 18 | Matrix Fibroblast |
| Ndufa4l2 | 1.69 | 0.00 | 0.00 | 0.47 | 0.01 | 18 | Matrix Fibroblast |

|               |      |      |      |      |      |    |                   |
|---------------|------|------|------|------|------|----|-------------------|
| Lhfp          | 1.67 | 0.00 | 0.00 | 0.69 | 0.15 | 18 | Matrix Fibroblast |
| Mcam          | 1.66 | 0.00 | 0.00 | 0.65 | 0.12 | 18 | Matrix Fibroblast |
| Maged2        | 1.66 | 0.00 | 0.00 | 0.66 | 0.16 | 18 | Matrix Fibroblast |
| Fam162b       | 1.63 | 0.00 | 0.00 | 0.40 | 0.01 | 18 | Matrix Fibroblast |
| Ebf1          | 1.62 | 0.00 | 0.00 | 0.52 | 0.04 | 18 | Matrix Fibroblast |
| Trpc6         | 1.56 | 0.00 | 0.00 | 0.40 | 0.01 | 18 | Matrix Fibroblast |
| Gpr126        | 1.56 | 0.00 | 0.00 | 0.56 | 0.10 | 18 | Matrix Fibroblast |
| Kcnk3         | 1.52 | 0.00 | 0.00 | 0.49 | 0.04 | 18 | Matrix Fibroblast |
| Lmcd1         | 1.52 | 0.00 | 0.00 | 0.45 | 0.04 | 18 | Matrix Fibroblast |
| Notch3        | 1.51 | 0.00 | 0.00 | 0.44 | 0.01 | 18 | Matrix Fibroblast |
| Nkain4        | 1.46 | 0.00 | 0.00 | 0.44 | 0.04 | 18 | Matrix Fibroblast |
| Sdc2          | 1.45 | 0.00 | 0.00 | 0.59 | 0.11 | 18 | Matrix Fibroblast |
| Fam101a       | 1.44 | 0.00 | 0.00 | 0.35 | 0.01 | 18 | Matrix Fibroblast |
| Heyl          | 1.44 | 0.00 | 0.00 | 0.39 | 0.02 | 18 | Matrix Fibroblast |
| Klhl23        | 1.42 | 0.00 | 0.00 | 0.44 | 0.05 | 18 | Matrix Fibroblast |
| Emid1         | 1.41 | 0.00 | 0.00 | 0.40 | 0.04 | 18 | Matrix Fibroblast |
| Tbx5          | 1.40 | 0.00 | 0.00 | 0.46 | 0.07 | 18 | Matrix Fibroblast |
| Gap43         | 1.35 | 0.00 | 0.00 | 0.26 | 0.02 | 18 | Matrix Fibroblast |
| Parm1         | 1.34 | 0.00 | 0.00 | 0.31 | 0.01 | 18 | Matrix Fibroblast |
| S1pr3         | 1.27 | 0.00 | 0.00 | 0.37 | 0.04 | 18 | Matrix Fibroblast |
| Naalad2       | 1.26 | 0.00 | 0.00 | 0.30 | 0.02 | 18 | Matrix Fibroblast |
| Wisp1         | 1.24 | 0.00 | 0.00 | 0.31 | 0.03 | 18 | Matrix Fibroblast |
| Cspg4         | 1.10 | 0.00 | 0.00 | 0.27 | 0.01 | 18 | Matrix Fibroblast |
| Vsnl1         | 1.09 | 0.00 | 0.00 | 0.27 | 0.02 | 18 | Matrix Fibroblast |
| Angpt1        | 1.40 | 0.00 | 0.00 | 0.44 | 0.07 | 18 | Matrix Fibroblast |
| Crim1         | 1.38 | 0.00 | 0.00 | 0.47 | 0.08 | 18 | Matrix Fibroblast |
| Ltbp2         | 1.21 | 0.00 | 0.00 | 0.49 | 0.09 | 18 | Matrix Fibroblast |
| Rarres2       | 1.30 | 0.00 | 0.00 | 0.57 | 0.13 | 18 | Matrix Fibroblast |
| Col4a1        | 1.41 | 0.00 | 0.00 | 0.92 | 0.49 | 18 | Matrix Fibroblast |
| F2r           | 1.50 | 0.00 | 0.00 | 0.55 | 0.14 | 18 | Matrix Fibroblast |
| Fermt2        | 1.56 | 0.00 | 0.00 | 0.83 | 0.39 | 18 | Matrix Fibroblast |
| Gjc1          | 1.17 | 0.00 | 0.00 | 0.39 | 0.07 | 18 | Matrix Fibroblast |
| Col4a2        | 1.28 | 0.00 | 0.00 | 0.87 | 0.42 | 18 | Matrix Fibroblast |
| 4-Sep         | 1.30 | 0.00 | 0.00 | 0.70 | 0.23 | 18 | Matrix Fibroblast |
| 1190002N15Rik | 0.96 | 0.00 | 0.00 | 0.26 | 0.03 | 18 | Matrix Fibroblast |
| Ppp1r14a      | 1.05 | 0.00 | 0.00 | 0.40 | 0.08 | 18 | Matrix Fibroblast |
| Ednra         | 1.10 | 0.00 | 0.00 | 0.41 | 0.08 | 18 | Matrix Fibroblast |
| Plac9b        | 0.94 | 0.00 | 0.00 | 0.82 | 0.29 | 18 | Matrix Fibroblast |
| P2ry14        | 0.93 | 0.00 | 0.00 | 0.40 | 0.08 | 18 | Matrix Fibroblast |
| Ehd3          | 0.96 | 0.00 | 0.00 | 0.26 | 0.04 | 18 | Matrix Fibroblast |
| Rasgrp2       | 1.06 | 0.00 | 0.00 | 0.42 | 0.09 | 18 | Matrix Fibroblast |
| Plac9a        | 0.93 | 0.00 | 0.00 | 0.81 | 0.30 | 18 | Matrix Fibroblast |
| Cadm1         | 1.31 | 0.00 | 0.00 | 0.50 | 0.14 | 18 | Matrix Fibroblast |

|          |       |      |      |      |      |      |    |                   |
|----------|-------|------|------|------|------|------|----|-------------------|
| Ccrl2    |       | 0.91 | 0.00 | 0.00 | 0.29 | 0.05 | 18 | Matrix Fibroblast |
| Mir143hg |       | 0.93 | 0.00 | 0.00 | 0.27 | 0.04 | 18 | Matrix Fibroblast |
| Nid1     |       | 1.21 | 0.00 | 0.00 | 0.64 | 0.23 | 18 | Matrix Fibroblast |
| Mapt     |       | 0.92 | 0.00 | 0.00 | 0.29 | 0.05 | 18 | Matrix Fibroblast |
| Sparc    |       | 0.78 | 0.00 | 0.00 | 0.99 | 0.73 | 18 | Matrix Fibroblast |
| Meg3     |       | 1.06 | 0.00 | 0.00 | 0.64 | 0.21 | 18 | Matrix Fibroblast |
| Lamb1    |       | 1.16 | 0.00 | 0.00 | 0.51 | 0.15 | 18 | Matrix Fibroblast |
| Cald1    |       | 0.98 | 0.00 | 0.00 | 0.82 | 0.41 | 18 | Matrix Fibroblast |
| Btbd3    |       | 1.05 | 0.00 | 0.00 | 0.48 | 0.14 | 18 | Matrix Fibroblast |
| Myh11    |       | 0.81 | 0.00 | 0.00 | 0.42 | 0.10 | 18 | Matrix Fibroblast |
|          | 7-Sep | 1.14 | 0.00 | 0.00 | 0.86 | 0.58 | 18 | Matrix Fibroblast |
| Cd81     |       | 1.04 | 0.00 | 0.00 | 0.77 | 0.40 | 18 | Matrix Fibroblast |
| H19      |       | 1.15 | 0.00 | 0.00 | 0.32 | 0.07 | 18 | Matrix Fibroblast |
| Aspn     |       | 0.52 | 0.00 | 0.00 | 0.39 | 0.10 | 18 | Matrix Fibroblast |
| MyI9     |       | 1.05 | 0.00 | 0.00 | 0.42 | 0.12 | 18 | Matrix Fibroblast |
| Nostrin  |       | 1.01 | 0.00 | 0.00 | 0.48 | 0.14 | 18 | Matrix Fibroblast |
| Ism1     |       | 1.02 | 0.00 | 0.00 | 0.35 | 0.08 | 18 | Matrix Fibroblast |
| Nr2f2    |       | 1.05 | 0.00 | 0.00 | 0.56 | 0.20 | 18 | Matrix Fibroblast |
| Cst3     |       | 0.96 | 0.00 | 0.00 | 0.87 | 0.59 | 18 | Matrix Fibroblast |
| Tiparp   |       | 1.07 | 0.00 | 0.00 | 0.35 | 0.09 | 18 | Matrix Fibroblast |
| Prr5l    |       | 0.98 | 0.00 | 0.00 | 0.29 | 0.06 | 18 | Matrix Fibroblast |
| Marcks   |       | 0.84 | 0.00 | 0.00 | 0.84 | 0.50 | 18 | Matrix Fibroblast |
| Gnas     |       | 1.00 | 0.00 | 0.00 | 0.89 | 0.67 | 18 | Matrix Fibroblast |
| Zeb2     |       | 0.99 | 0.00 | 0.00 | 0.68 | 0.31 | 18 | Matrix Fibroblast |
| Lama4    |       | 0.97 | 0.00 | 0.00 | 0.43 | 0.13 | 18 | Matrix Fibroblast |
| Ndn      |       | 0.89 | 0.00 | 0.00 | 0.26 | 0.05 | 18 | Matrix Fibroblast |
| Myo1b    |       | 1.02 | 0.00 | 0.00 | 0.48 | 0.16 | 18 | Matrix Fibroblast |
| Igf2r    |       | 0.98 | 0.00 | 0.00 | 0.37 | 0.10 | 18 | Matrix Fibroblast |
| Gng11    |       | 0.97 | 0.00 | 0.00 | 0.64 | 0.28 | 18 | Matrix Fibroblast |
| Col1a2   |       | 0.26 | 0.00 | 0.00 | 0.91 | 0.39 | 18 | Matrix Fibroblast |
| Car2     |       | 1.12 | 0.00 | 0.00 | 0.63 | 0.29 | 18 | Matrix Fibroblast |
| Egflam   |       | 0.85 | 0.00 | 0.00 | 0.30 | 0.08 | 18 | Matrix Fibroblast |
| Filip1l  |       | 0.96 | 0.00 | 0.00 | 0.67 | 0.32 | 18 | Matrix Fibroblast |
| Rasl11a  |       | 0.88 | 0.00 | 0.00 | 0.26 | 0.06 | 18 | Matrix Fibroblast |
| Hsd11b1  |       | 0.95 | 0.00 | 0.00 | 0.33 | 0.09 | 18 | Matrix Fibroblast |
| Nes      |       | 0.88 | 0.00 | 0.00 | 0.55 | 0.21 | 18 | Matrix Fibroblast |
| Pcolce   |       | 0.87 | 0.00 | 0.00 | 0.31 | 0.08 | 18 | Matrix Fibroblast |
| Tbx4     |       | 0.77 | 0.00 | 0.00 | 0.27 | 0.06 | 18 | Matrix Fibroblast |
| Pten     |       | 0.89 | 0.00 | 0.00 | 0.37 | 0.12 | 18 | Matrix Fibroblast |
| Ifitm1   |       | 0.42 | 0.00 | 0.00 | 0.43 | 0.14 | 18 | Matrix Fibroblast |
| Isca1    |       | 0.88 | 0.00 | 0.00 | 0.33 | 0.10 | 18 | Matrix Fibroblast |
| Itgb1    |       | 0.75 | 0.00 | 0.00 | 0.87 | 0.63 | 18 | Matrix Fibroblast |
| Tpm2     |       | 0.77 | 0.00 | 0.00 | 0.39 | 0.13 | 18 | Matrix Fibroblast |

|                |      |      |      |      |      |    |                   |
|----------------|------|------|------|------|------|----|-------------------|
| Cryab          | 0.96 | 0.00 | 0.00 | 0.39 | 0.14 | 18 | Matrix Fibroblast |
| Col3a1         | 0.26 | 0.00 | 0.00 | 0.74 | 0.32 | 18 | Matrix Fibroblast |
| Sept11         | 0.98 | 0.00 | 0.00 | 0.50 | 0.22 | 18 | Matrix Fibroblast |
| Loxl2          | 0.65 | 0.00 | 0.00 | 0.40 | 0.13 | 18 | Matrix Fibroblast |
| Cdkn1c         | 0.88 | 0.00 | 0.00 | 0.45 | 0.18 | 18 | Matrix Fibroblast |
| Itga4          | 0.78 | 0.00 | 0.00 | 0.31 | 0.09 | 18 | Matrix Fibroblast |
| Ndrp2          | 0.68 | 0.00 | 0.00 | 0.28 | 0.08 | 18 | Matrix Fibroblast |
| Rhoj           | 0.77 | 0.00 | 0.00 | 0.46 | 0.18 | 18 | Matrix Fibroblast |
| Mxra8          | 0.79 | 0.00 | 0.00 | 0.42 | 0.16 | 18 | Matrix Fibroblast |
| Epb4.1l2       | 0.88 | 0.00 | 0.00 | 0.45 | 0.19 | 18 | Matrix Fibroblast |
| Ccdc80         | 0.80 | 0.00 | 0.00 | 0.33 | 0.11 | 18 | Matrix Fibroblast |
| Dkk3           | 0.75 | 0.00 | 0.00 | 0.34 | 0.11 | 18 | Matrix Fibroblast |
| AK157302       | 0.79 | 0.00 | 0.00 | 0.27 | 0.08 | 18 | Matrix Fibroblast |
| Gnb4           | 0.84 | 0.00 | 0.00 | 0.35 | 0.13 | 18 | Matrix Fibroblast |
| Mylk           | 0.68 | 0.00 | 0.00 | 0.56 | 0.27 | 18 | Matrix Fibroblast |
| Tbx2           | 0.80 | 0.00 | 0.00 | 0.33 | 0.12 | 18 | Matrix Fibroblast |
| Lims1          | 0.86 | 0.00 | 0.00 | 0.54 | 0.28 | 18 | Matrix Fibroblast |
| Eva1b          | 0.81 | 0.00 | 0.00 | 0.44 | 0.20 | 18 | Matrix Fibroblast |
| Tgfb2          | 0.92 | 0.00 | 0.00 | 0.36 | 0.14 | 18 | Matrix Fibroblast |
| Cbfa2t3        | 0.75 | 0.00 | 0.00 | 0.37 | 0.14 | 18 | Matrix Fibroblast |
| Armxc3         | 0.74 | 0.00 | 0.00 | 0.30 | 0.11 | 18 | Matrix Fibroblast |
| Agpat5         | 0.84 | 0.00 | 0.00 | 0.28 | 0.09 | 18 | Matrix Fibroblast |
| Acta2          | 0.75 | 0.00 | 0.00 | 0.43 | 0.19 | 18 | Matrix Fibroblast |
| Fstl1          | 0.36 | 0.00 | 0.00 | 0.76 | 0.44 | 18 | Matrix Fibroblast |
| Fam162a        | 0.82 | 0.00 | 0.00 | 0.35 | 0.14 | 18 | Matrix Fibroblast |
| Ifitm3         | 0.54 | 0.00 | 0.00 | 0.68 | 0.39 | 18 | Matrix Fibroblast |
| App            | 0.55 | 0.00 | 0.00 | 0.80 | 0.59 | 18 | Matrix Fibroblast |
| Mgst3          | 0.77 | 0.00 | 0.00 | 0.27 | 0.10 | 18 | Matrix Fibroblast |
| Oaz2           | 0.74 | 0.00 | 0.00 | 0.52 | 0.28 | 18 | Matrix Fibroblast |
| Laptm4a        | 0.61 | 0.00 | 0.00 | 0.72 | 0.52 | 18 | Matrix Fibroblast |
| Tns1           | 0.60 | 0.00 | 0.00 | 0.48 | 0.23 | 18 | Matrix Fibroblast |
| Mfap2          | 0.54 | 0.00 | 0.00 | 0.63 | 0.35 | 18 | Matrix Fibroblast |
| Ssr3           | 0.76 | 0.00 | 0.00 | 0.53 | 0.31 | 18 | Matrix Fibroblast |
| Mat2a          | 0.78 | 0.00 | 0.00 | 0.50 | 0.27 | 18 | Matrix Fibroblast |
| Vasp           | 0.72 | 0.00 | 0.00 | 0.40 | 0.19 | 18 | Matrix Fibroblast |
| G0s2           | 0.50 | 0.00 | 0.00 | 0.33 | 0.13 | 18 | Matrix Fibroblast |
| Zfhx3          | 0.80 | 0.00 | 0.00 | 0.37 | 0.17 | 18 | Matrix Fibroblast |
| Tagln          | 0.59 | 0.00 | 0.00 | 0.35 | 0.15 | 18 | Matrix Fibroblast |
| RP23-103l12.13 | 0.52 | 0.00 | 0.00 | 0.27 | 0.10 | 18 | Matrix Fibroblast |
| Fam104a        | 0.74 | 0.00 | 0.00 | 0.38 | 0.18 | 18 | Matrix Fibroblast |
| Serpinh1       | 0.68 | 0.00 | 0.00 | 0.61 | 0.39 | 18 | Matrix Fibroblast |
| Gpx3           | 0.60 | 0.00 | 0.00 | 0.32 | 0.14 | 18 | Matrix Fibroblast |
| Mest           | 0.81 | 0.00 | 0.00 | 0.40 | 0.20 | 18 | Matrix Fibroblast |

|         |      |      |      |      |      |    |                   |
|---------|------|------|------|------|------|----|-------------------|
| Col5a2  | 0.62 | 0.00 | 0.00 | 0.38 | 0.18 | 18 | Matrix Fibroblast |
| RbmX    | 0.76 | 0.00 | 0.00 | 0.27 | 0.11 | 18 | Matrix Fibroblast |
| Eif4e3  | 0.66 | 0.00 | 0.00 | 0.26 | 0.11 | 18 | Matrix Fibroblast |
| Nptn    | 0.73 | 0.00 | 0.00 | 0.40 | 0.21 | 18 | Matrix Fibroblast |
| Bgn     | 0.43 | 0.00 | 0.00 | 0.47 | 0.24 | 18 | Matrix Fibroblast |
| Lgals1  | 0.38 | 0.00 | 0.00 | 0.69 | 0.41 | 18 | Matrix Fibroblast |
| Nfia    | 0.68 | 0.00 | 0.00 | 0.43 | 0.24 | 18 | Matrix Fibroblast |
| Tsc22d1 | 0.54 | 0.00 | 0.00 | 0.55 | 0.33 | 18 | Matrix Fibroblast |
| Tpm4    | 0.63 | 0.00 | 0.00 | 0.65 | 0.49 | 18 | Matrix Fibroblast |
| mt-Cytb | 0.37 | 0.00 | 0.00 | 0.90 | 0.82 | 18 | Matrix Fibroblast |
| Gpx8    | 0.58 | 0.00 | 0.00 | 0.31 | 0.14 | 18 | Matrix Fibroblast |
| Ginm1   | 0.65 | 0.00 | 0.00 | 0.41 | 0.23 | 18 | Matrix Fibroblast |
| Tuba1a  | 0.47 | 0.00 | 0.00 | 0.70 | 0.51 | 18 | Matrix Fibroblast |
| Ppic    | 0.52 | 0.00 | 0.00 | 0.56 | 0.38 | 18 | Matrix Fibroblast |
| Csnk1e  | 0.55 | 0.00 | 0.00 | 0.28 | 0.13 | 18 | Matrix Fibroblast |
| Fbn1    | 0.55 | 0.00 | 0.00 | 0.34 | 0.17 | 18 | Matrix Fibroblast |
| Myh9    | 0.54 | 0.00 | 0.00 | 0.51 | 0.33 | 18 | Matrix Fibroblast |
| Rell1   | 0.62 | 0.00 | 0.00 | 0.37 | 0.20 | 18 | Matrix Fibroblast |
| Rap2a   | 0.56 | 0.00 | 0.00 | 0.32 | 0.16 | 18 | Matrix Fibroblast |
| Ccnd2   | 0.57 | 0.00 | 0.00 | 0.46 | 0.28 | 18 | Matrix Fibroblast |
| Acaa2   | 0.61 | 0.00 | 0.00 | 0.31 | 0.16 | 18 | Matrix Fibroblast |
| Spred1  | 0.63 | 0.00 | 0.00 | 0.26 | 0.12 | 18 | Matrix Fibroblast |
| Pcdhga9 | 0.55 | 0.00 | 0.00 | 0.33 | 0.18 | 18 | Matrix Fibroblast |
| Rsu1    | 0.58 | 0.00 | 0.00 | 0.35 | 0.20 | 18 | Matrix Fibroblast |
| Slc25a4 | 0.45 | 0.00 | 0.00 | 0.65 | 0.50 | 18 | Matrix Fibroblast |
| Ilk     | 0.56 | 0.00 | 0.00 | 0.39 | 0.23 | 18 | Matrix Fibroblast |
| mt-Atp6 | 0.29 | 0.00 | 0.00 | 0.91 | 0.85 | 18 | Matrix Fibroblast |
| mt-Nd4  | 0.33 | 0.00 | 0.00 | 0.86 | 0.75 | 18 | Matrix Fibroblast |
| Tln1    | 0.51 | 0.00 | 0.00 | 0.55 | 0.40 | 18 | Matrix Fibroblast |
| Ppfibp1 | 0.54 | 0.00 | 0.00 | 0.27 | 0.14 | 18 | Matrix Fibroblast |
| Cnn2    | 0.48 | 0.00 | 0.00 | 0.55 | 0.39 | 18 | Matrix Fibroblast |
| Prex2   | 0.54 | 0.00 | 0.00 | 0.33 | 0.18 | 18 | Matrix Fibroblast |
| mt-Nd5  | 0.31 | 0.00 | 0.00 | 0.85 | 0.76 | 18 | Matrix Fibroblast |
| Dnajc10 | 0.47 | 0.00 | 0.00 | 0.28 | 0.15 | 18 | Matrix Fibroblast |
| Pja2    | 0.50 | 0.00 | 0.00 | 0.27 | 0.14 | 18 | Matrix Fibroblast |
| Ckb     | 0.47 | 0.00 | 0.00 | 0.27 | 0.14 | 18 | Matrix Fibroblast |
| Cd302   | 0.52 | 0.00 | 0.00 | 0.27 | 0.14 | 18 | Matrix Fibroblast |
| Gm7676  | 0.35 | 0.00 | 0.00 | 0.33 | 0.19 | 18 | Matrix Fibroblast |
| Cd63    | 0.41 | 0.00 | 0.00 | 0.45 | 0.30 | 18 | Matrix Fibroblast |
| Myl12a  | 0.36 | 0.00 | 0.00 | 0.75 | 0.66 | 18 | Matrix Fibroblast |
| Camk2n1 | 0.50 | 0.00 | 0.00 | 0.26 | 0.14 | 18 | Matrix Fibroblast |
| Pam     | 0.37 | 0.00 | 0.00 | 0.31 | 0.17 | 18 | Matrix Fibroblast |
| mt-Nd2  | 0.32 | 0.00 | 0.00 | 0.78 | 0.70 | 18 | Matrix Fibroblast |

|          |      |      |      |      |      |    |                   |
|----------|------|------|------|------|------|----|-------------------|
| Dpysl2   | 0.46 | 0.00 | 0.00 | 0.29 | 0.18 | 18 | Matrix Fibroblast |
| Nedd4    | 0.30 | 0.00 | 0.00 | 0.66 | 0.53 | 18 | Matrix Fibroblast |
| Rbms1    | 0.45 | 0.00 | 0.00 | 0.50 | 0.39 | 18 | Matrix Fibroblast |
| Tpm1     | 0.49 | 0.00 | 0.00 | 0.65 | 0.52 | 18 | Matrix Fibroblast |
| Tacc1    | 0.46 | 0.00 | 0.00 | 0.34 | 0.23 | 18 | Matrix Fibroblast |
| Cdc42bpa | 0.45 | 0.00 | 0.00 | 0.26 | 0.15 | 18 | Matrix Fibroblast |
| Lamc1    | 0.44 | 0.00 | 0.00 | 0.27 | 0.16 | 18 | Matrix Fibroblast |
| Crip1    | 0.26 | 0.00 | 0.00 | 0.61 | 0.48 | 18 | Matrix Fibroblast |
| Crip2    | 0.26 | 0.00 | 0.00 | 0.57 | 0.41 | 18 | Matrix Fibroblast |
| Mxd4     | 0.38 | 0.00 | 0.00 | 0.50 | 0.38 | 18 | Matrix Fibroblast |
| Hsp90b1  | 0.29 | 0.00 | 0.00 | 0.82 | 0.76 | 18 | Matrix Fibroblast |
| Serinc1  | 0.39 | 0.00 | 0.00 | 0.41 | 0.29 | 18 | Matrix Fibroblast |
| Eid1     | 0.39 | 0.00 | 0.00 | 0.41 | 0.29 | 18 | Matrix Fibroblast |
| Lpp      | 0.40 | 0.00 | 0.00 | 0.33 | 0.22 | 18 | Matrix Fibroblast |
| Dync1i2  | 0.34 | 0.00 | 0.00 | 0.59 | 0.48 | 18 | Matrix Fibroblast |
| Ktn1     | 0.45 | 0.00 | 0.00 | 0.48 | 0.38 | 18 | Matrix Fibroblast |
| Myadm    | 0.38 | 0.00 | 0.00 | 0.30 | 0.20 | 18 | Matrix Fibroblast |
| Map1lc3a | 0.39 | 0.00 | 0.00 | 0.30 | 0.20 | 18 | Matrix Fibroblast |
| Thra     | 0.40 | 0.00 | 0.00 | 0.27 | 0.17 | 18 | Matrix Fibroblast |
| Tcf4     | 0.30 | 0.00 | 0.00 | 0.53 | 0.41 | 18 | Matrix Fibroblast |
| mt-Nd3   | 0.32 | 0.00 | 0.00 | 0.58 | 0.48 | 18 | Matrix Fibroblast |
| Htatsf1  | 0.46 | 0.00 | 0.00 | 0.36 | 0.26 | 18 | Matrix Fibroblast |
| Brd3     | 0.42 | 0.00 | 0.00 | 0.35 | 0.25 | 18 | Matrix Fibroblast |
| Timp3    | 0.58 | 0.00 | 0.00 | 0.44 | 0.36 | 18 | Matrix Fibroblast |
| Leprot   | 0.37 | 0.00 | 0.00 | 0.42 | 0.33 | 18 | Matrix Fibroblast |
| Mprip    | 0.41 | 0.00 | 0.00 | 0.30 | 0.21 | 18 | Matrix Fibroblast |
| Phlda1   | 0.31 | 0.00 | 0.00 | 0.30 | 0.20 | 18 | Matrix Fibroblast |
| Ppib     | 0.32 | 0.00 | 0.00 | 0.51 | 0.43 | 18 | Matrix Fibroblast |
| Ptms     | 0.28 | 0.00 | 0.00 | 0.50 | 0.40 | 18 | Matrix Fibroblast |
| Itm2c    | 0.33 | 0.00 | 0.00 | 0.31 | 0.23 | 18 | Matrix Fibroblast |
| Eif4g3   | 0.42 | 0.00 | 0.00 | 0.36 | 0.27 | 18 | Matrix Fibroblast |
| Ostc     | 0.39 | 0.00 | 0.00 | 0.32 | 0.23 | 18 | Matrix Fibroblast |
| Sepw1    | 0.37 | 0.00 | 0.00 | 0.28 | 0.20 | 18 | Matrix Fibroblast |
| Pnn      | 0.27 | 0.00 | 0.00 | 0.61 | 0.54 | 18 | Matrix Fibroblast |
| Calu     | 0.31 | 0.00 | 0.00 | 0.33 | 0.24 | 18 | Matrix Fibroblast |
| Vezf1    | 0.35 | 0.00 | 0.00 | 0.32 | 0.24 | 18 | Matrix Fibroblast |
| Cnn3     | 0.25 | 0.00 | 0.00 | 0.41 | 0.30 | 18 | Matrix Fibroblast |
| Ube3a    | 0.36 | 0.00 | 0.00 | 0.26 | 0.18 | 18 | Matrix Fibroblast |
| Id3      | 0.29 | 0.00 | 0.00 | 0.54 | 0.46 | 18 | Matrix Fibroblast |
| Rbpms    | 0.31 | 0.00 | 0.00 | 0.27 | 0.19 | 18 | Matrix Fibroblast |
| Tmem30a  | 0.40 | 0.00 | 0.00 | 0.36 | 0.28 | 18 | Matrix Fibroblast |
| Tmem50a  | 0.31 | 0.00 | 0.00 | 0.52 | 0.45 | 18 | Matrix Fibroblast |
| Gm10222  | 0.28 | 0.00 | 0.00 | 0.51 | 0.43 | 18 | Matrix Fibroblast |

|               |      |      |      |      |      |    |                   |
|---------------|------|------|------|------|------|----|-------------------|
| Ccdc88a       | 0.35 | 0.00 | 0.00 | 0.33 | 0.24 | 18 | Matrix Fibroblast |
| 2410006H16Rik | 0.36 | 0.00 | 0.00 | 0.34 | 0.26 | 18 | Matrix Fibroblast |
| Canx          | 0.29 | 0.00 | 0.00 | 0.56 | 0.49 | 18 | Matrix Fibroblast |
| Pfdn1         | 0.38 | 0.00 | 0.00 | 0.34 | 0.26 | 18 | Matrix Fibroblast |
| Ddah2         | 0.25 | 0.00 | 0.00 | 0.35 | 0.26 | 18 | Matrix Fibroblast |
| Hspa5         | 0.28 | 0.00 | 0.00 | 0.61 | 0.55 | 18 | Matrix Fibroblast |
| Tmem176b      | 0.26 | 0.00 | 0.00 | 0.42 | 0.34 | 18 | Matrix Fibroblast |
| Aldh2         | 0.30 | 0.00 | 0.00 | 0.40 | 0.33 | 18 | Matrix Fibroblast |
| Zbtb20        | 0.34 | 0.00 | 0.01 | 0.34 | 0.27 | 18 | Matrix Fibroblast |
| Jak1          | 0.28 | 0.00 | 0.01 | 0.33 | 0.25 | 18 | Matrix Fibroblast |
| Ppp1r12a      | 0.27 | 0.00 | 0.01 | 0.33 | 0.25 | 18 | Matrix Fibroblast |
| Selk          | 0.26 | 0.00 | 0.01 | 0.39 | 0.32 | 18 | Matrix Fibroblast |
| Flna          | 0.31 | 0.00 | 0.01 | 0.30 | 0.23 | 18 | Matrix Fibroblast |
| Coro1b        | 0.35 | 0.00 | 0.02 | 0.31 | 0.24 | 18 | Matrix Fibroblast |
| B230219D22Rik | 0.28 | 0.00 | 0.04 | 0.34 | 0.28 | 18 | Matrix Fibroblast |
| Ccl21a        | 3.83 | 0.00 | 0.00 | 0.28 | 0.01 | 19 | Endothelial       |
| Gm21541       | 3.72 | 0.00 | 0.00 | 0.29 | 0.01 | 19 | Endothelial       |
| Gm13304       | 3.70 | 0.00 | 0.00 | 0.29 | 0.00 | 19 | Endothelial       |
| Gm10591       | 2.51 | 0.00 | 0.00 | 0.26 | 0.00 | 19 | Endothelial       |
| Mmrn1         | 1.60 | 0.00 | 0.00 | 0.30 | 0.00 | 19 | Endothelial       |
| Igf2          | 1.55 | 0.00 | 0.00 | 0.29 | 0.07 | 19 | Endothelial       |
| H19           | 1.58 | 0.00 | 0.00 | 0.28 | 0.07 | 19 | Endothelial       |
| Arl4a         | 0.81 | 0.00 | 0.00 | 0.35 | 0.11 | 19 | Endothelial       |
| Lhfpl2        | 1.27 | 0.00 | 0.00 | 0.27 | 0.09 | 19 | Endothelial       |
| Tubb4b-ps1    | 0.95 | 0.00 | 0.00 | 0.25 | 0.09 | 19 | Endothelial       |
| Hba-a2        | 2.21 | 0.00 | 0.00 | 0.79 | 0.70 | 19 | Endothelial       |
| Hba-a1        | 2.21 | 0.00 | 0.00 | 0.78 | 0.71 | 19 | Endothelial       |
| Hbb-bt        | 2.20 | 0.00 | 0.00 | 0.80 | 0.71 | 19 | Endothelial       |
| Hbb-bs        | 2.12 | 0.00 | 0.00 | 0.85 | 0.81 | 19 | Endothelial       |
| Cd24a         | 0.60 | 0.00 | 0.00 | 0.28 | 0.13 | 19 | Endothelial       |
| Atg3          | 1.06 | 0.00 | 0.00 | 0.33 | 0.19 | 19 | Endothelial       |
| Tia1          | 0.88 | 0.00 | 0.00 | 0.36 | 0.22 | 19 | Endothelial       |
| Gng11         | 0.94 | 0.00 | 0.00 | 0.38 | 0.29 | 19 | Endothelial       |
| Maf           | 0.37 | 0.00 | 0.00 | 0.30 | 0.19 | 19 | Endothelial       |
| Creg1         | 0.35 | 0.00 | 0.00 | 0.28 | 0.17 | 19 | Endothelial       |
| Rab11a        | 0.39 | 0.00 | 0.00 | 0.37 | 0.26 | 19 | Endothelial       |
| Pabpc1        | 0.40 | 0.00 | 0.00 | 0.80 | 0.81 | 19 | Endothelial       |
| Nudt4         | 0.37 | 0.00 | 0.04 | 0.25 | 0.17 | 19 | Endothelial       |
| Igfbp3        | 3.21 | 0.00 | 0.00 | 0.81 | 0.06 | 20 | Matrix Fibroblast |
| Enpp2         | 2.50 | 0.00 | 0.00 | 0.72 | 0.06 | 20 | Matrix Fibroblast |
| Tgfb1         | 2.47 | 0.00 | 0.00 | 0.88 | 0.18 | 20 | Matrix Fibroblast |
| Dnm3os        | 2.38 | 0.00 | 0.00 | 0.69 | 0.05 | 20 | Matrix Fibroblast |
| Rgs2          | 2.35 | 0.00 | 0.00 | 0.89 | 0.27 | 20 | Matrix Fibroblast |

|                |      |      |      |      |      |    |                   |
|----------------|------|------|------|------|------|----|-------------------|
| Agt            | 2.09 | 0.00 | 0.00 | 0.76 | 0.09 | 20 | Matrix Fibroblast |
| Fibin          | 2.02 | 0.00 | 0.00 | 0.68 | 0.12 | 20 | Matrix Fibroblast |
| Meg3           | 1.87 | 0.00 | 0.00 | 0.88 | 0.21 | 20 | Matrix Fibroblast |
| Fam105a        | 1.80 | 0.00 | 0.00 | 0.59 | 0.06 | 20 | Matrix Fibroblast |
| Penk           | 1.72 | 0.00 | 0.00 | 0.34 | 0.01 | 20 | Matrix Fibroblast |
| Tgfbr3         | 1.69 | 0.00 | 0.00 | 0.56 | 0.08 | 20 | Matrix Fibroblast |
| Scara5         | 1.37 | 0.00 | 0.00 | 0.31 | 0.01 | 20 | Matrix Fibroblast |
| Crispld2       | 1.36 | 0.00 | 0.00 | 0.32 | 0.03 | 20 | Matrix Fibroblast |
| Kcnj8          | 1.29 | 0.00 | 0.00 | 0.28 | 0.02 | 20 | Matrix Fibroblast |
| H19            | 1.66 | 0.00 | 0.00 | 0.48 | 0.07 | 20 | Matrix Fibroblast |
| Egr1           | 2.07 | 0.00 | 0.00 | 0.62 | 0.13 | 20 | Matrix Fibroblast |
| Fos            | 2.11 | 0.00 | 0.00 | 0.72 | 0.19 | 20 | Matrix Fibroblast |
| Jun            | 1.86 | 0.00 | 0.00 | 0.87 | 0.36 | 20 | Matrix Fibroblast |
| Trp53inp1      | 1.54 | 0.00 | 0.00 | 0.45 | 0.07 | 20 | Matrix Fibroblast |
| Hspb1          | 2.23 | 0.00 | 0.00 | 0.59 | 0.13 | 20 | Matrix Fibroblast |
| Ctsl           | 1.78 | 0.00 | 0.00 | 0.87 | 0.39 | 20 | Matrix Fibroblast |
| Gpx3           | 1.58 | 0.00 | 0.00 | 0.60 | 0.13 | 20 | Matrix Fibroblast |
| Lpin1          | 1.22 | 0.00 | 0.00 | 0.29 | 0.03 | 20 | Matrix Fibroblast |
| Rhou           | 1.35 | 0.00 | 0.00 | 0.38 | 0.06 | 20 | Matrix Fibroblast |
| Fmo2           | 1.59 | 0.00 | 0.00 | 0.64 | 0.17 | 20 | Matrix Fibroblast |
| Pcsk5          | 1.46 | 0.00 | 0.00 | 0.47 | 0.10 | 20 | Matrix Fibroblast |
| Tsc22d3        | 1.60 | 0.00 | 0.00 | 0.69 | 0.24 | 20 | Matrix Fibroblast |
| Loxl2          | 1.53 | 0.00 | 0.00 | 0.53 | 0.13 | 20 | Matrix Fibroblast |
| Adamts1        | 1.60 | 0.00 | 0.00 | 0.64 | 0.21 | 20 | Matrix Fibroblast |
| Zbtb16         | 1.17 | 0.00 | 0.00 | 0.33 | 0.05 | 20 | Matrix Fibroblast |
| Klf9           | 1.43 | 0.00 | 0.00 | 0.61 | 0.19 | 20 | Matrix Fibroblast |
| Cdkn1a         | 1.22 | 0.00 | 0.00 | 0.57 | 0.16 | 20 | Matrix Fibroblast |
| RP23-103112.13 | 1.35 | 0.00 | 0.00 | 0.44 | 0.10 | 20 | Matrix Fibroblast |
| Ybx3           | 1.36 | 0.00 | 0.00 | 0.60 | 0.19 | 20 | Matrix Fibroblast |
| Npr3           | 1.48 | 0.00 | 0.00 | 0.50 | 0.13 | 20 | Matrix Fibroblast |
| Bmp2           | 1.15 | 0.00 | 0.00 | 0.26 | 0.04 | 20 | Matrix Fibroblast |
| Btg2           | 1.78 | 0.00 | 0.00 | 0.62 | 0.23 | 20 | Matrix Fibroblast |
| Glul           | 1.37 | 0.00 | 0.00 | 0.62 | 0.22 | 20 | Matrix Fibroblast |
| Junb           | 1.49 | 0.00 | 0.00 | 0.58 | 0.19 | 20 | Matrix Fibroblast |
| Gpr64          | 1.07 | 0.00 | 0.00 | 0.29 | 0.05 | 20 | Matrix Fibroblast |
| Bnip3          | 1.18 | 0.00 | 0.00 | 0.38 | 0.08 | 20 | Matrix Fibroblast |
| Socs2          | 1.30 | 0.00 | 0.00 | 0.73 | 0.33 | 20 | Matrix Fibroblast |
| Eln            | 1.01 | 0.00 | 0.00 | 0.53 | 0.16 | 20 | Matrix Fibroblast |
| Tshz1          | 1.30 | 0.00 | 0.00 | 0.43 | 0.12 | 20 | Matrix Fibroblast |
| Hhip           | 1.03 | 0.00 | 0.00 | 0.33 | 0.07 | 20 | Matrix Fibroblast |
| Il6ra          | 1.12 | 0.00 | 0.00 | 0.40 | 0.10 | 20 | Matrix Fibroblast |
| Ndr2           | 1.00 | 0.00 | 0.00 | 0.35 | 0.08 | 20 | Matrix Fibroblast |
| Marcks         | 1.08 | 0.00 | 0.00 | 0.84 | 0.50 | 20 | Matrix Fibroblast |

|               |      |      |      |      |      |    |                   |
|---------------|------|------|------|------|------|----|-------------------|
| Fkbp5         | 1.16 | 0.00 | 0.00 | 0.36 | 0.09 | 20 | Matrix Fibroblast |
| D4Wsu53e      | 1.14 | 0.00 | 0.00 | 0.84 | 0.60 | 20 | Matrix Fibroblast |
| Col1a2        | 0.49 | 0.00 | 0.00 | 0.91 | 0.39 | 20 | Matrix Fibroblast |
| Gm13889       | 1.16 | 0.00 | 0.00 | 0.30 | 0.07 | 20 | Matrix Fibroblast |
| Aldh2         | 1.27 | 0.00 | 0.00 | 0.67 | 0.33 | 20 | Matrix Fibroblast |
| Mgp           | 1.09 | 0.00 | 0.00 | 0.74 | 0.31 | 20 | Matrix Fibroblast |
| Lox           | 1.07 | 0.00 | 0.00 | 0.45 | 0.13 | 20 | Matrix Fibroblast |
| Cyr61         | 1.46 | 0.00 | 0.00 | 0.42 | 0.13 | 20 | Matrix Fibroblast |
| Ism1          | 1.09 | 0.00 | 0.00 | 0.35 | 0.09 | 20 | Matrix Fibroblast |
| Igf2          | 1.01 | 0.00 | 0.00 | 0.31 | 0.07 | 20 | Matrix Fibroblast |
| Pdzn3         | 1.01 | 0.00 | 0.00 | 0.26 | 0.06 | 20 | Matrix Fibroblast |
| Zfp36         | 1.29 | 0.00 | 0.00 | 0.46 | 0.16 | 20 | Matrix Fibroblast |
| Net1          | 1.14 | 0.00 | 0.00 | 0.48 | 0.17 | 20 | Matrix Fibroblast |
| Arrdc3        | 1.12 | 0.00 | 0.00 | 0.38 | 0.11 | 20 | Matrix Fibroblast |
| Prdm6         | 0.93 | 0.00 | 0.00 | 0.28 | 0.06 | 20 | Matrix Fibroblast |
| Pros1         | 1.02 | 0.00 | 0.00 | 0.35 | 0.10 | 20 | Matrix Fibroblast |
| Rora          | 1.15 | 0.00 | 0.00 | 0.35 | 0.10 | 20 | Matrix Fibroblast |
| Malat1        | 0.45 | 0.00 | 0.00 | 1.00 | 1.00 | 20 | Matrix Fibroblast |
| Atp2b1        | 0.99 | 0.00 | 0.00 | 0.80 | 0.58 | 20 | Matrix Fibroblast |
| Pdgfra        | 0.86 | 0.00 | 0.00 | 0.26 | 0.06 | 20 | Matrix Fibroblast |
| Creb3l2       | 0.99 | 0.00 | 0.00 | 0.39 | 0.13 | 20 | Matrix Fibroblast |
| Tbx5          | 1.03 | 0.00 | 0.00 | 0.29 | 0.08 | 20 | Matrix Fibroblast |
| Nbl1          | 0.91 | 0.00 | 0.00 | 0.27 | 0.07 | 20 | Matrix Fibroblast |
| Socs3         | 1.06 | 0.00 | 0.00 | 0.27 | 0.07 | 20 | Matrix Fibroblast |
| Drap1         | 1.17 | 0.00 | 0.00 | 0.53 | 0.25 | 20 | Matrix Fibroblast |
| Apoe          | 0.79 | 0.00 | 0.00 | 0.60 | 0.28 | 20 | Matrix Fibroblast |
| Zfp36l1       | 1.09 | 0.00 | 0.00 | 0.70 | 0.45 | 20 | Matrix Fibroblast |
| Dusp1         | 1.10 | 0.00 | 0.00 | 0.43 | 0.17 | 20 | Matrix Fibroblast |
| Col1a1        | 0.58 | 0.00 | 0.00 | 0.59 | 0.26 | 20 | Matrix Fibroblast |
| Gm26669       | 1.18 | 0.00 | 0.00 | 0.49 | 0.22 | 20 | Matrix Fibroblast |
| Thbs1         | 1.08 | 0.00 | 0.00 | 0.37 | 0.13 | 20 | Matrix Fibroblast |
| Col3a1        | 0.40 | 0.00 | 0.00 | 0.71 | 0.33 | 20 | Matrix Fibroblast |
| Ednrb         | 0.71 | 0.00 | 0.00 | 0.41 | 0.15 | 20 | Matrix Fibroblast |
| Ier2          | 1.11 | 0.00 | 0.00 | 0.50 | 0.25 | 20 | Matrix Fibroblast |
| Mark3         | 1.08 | 0.00 | 0.00 | 0.40 | 0.16 | 20 | Matrix Fibroblast |
| Gm9847        | 0.96 | 0.00 | 0.00 | 0.39 | 0.16 | 20 | Matrix Fibroblast |
| Nrep          | 0.71 | 0.00 | 0.00 | 0.73 | 0.43 | 20 | Matrix Fibroblast |
| Higd1a        | 1.16 | 0.00 | 0.00 | 0.41 | 0.18 | 20 | Matrix Fibroblast |
| 1700025G04Rik | 0.94 | 0.00 | 0.00 | 0.29 | 0.10 | 20 | Matrix Fibroblast |
| Samd4         | 0.91 | 0.00 | 0.00 | 0.27 | 0.08 | 20 | Matrix Fibroblast |
| Insig2        | 0.95 | 0.00 | 0.00 | 0.29 | 0.10 | 20 | Matrix Fibroblast |
| Rhoj          | 0.88 | 0.00 | 0.00 | 0.42 | 0.18 | 20 | Matrix Fibroblast |
| Mfap2         | 0.81 | 0.00 | 0.00 | 0.61 | 0.35 | 20 | Matrix Fibroblast |

|           |      |      |      |      |      |    |                   |
|-----------|------|------|------|------|------|----|-------------------|
| Pxdn      | 0.79 | 0.00 | 0.00 | 0.29 | 0.11 | 20 | Matrix Fibroblast |
| Lamc1     | 0.80 | 0.00 | 0.00 | 0.36 | 0.16 | 20 | Matrix Fibroblast |
| Gm9790    | 1.02 | 0.00 | 0.00 | 0.36 | 0.17 | 20 | Matrix Fibroblast |
| Lama4     | 0.90 | 0.00 | 0.00 | 0.32 | 0.13 | 20 | Matrix Fibroblast |
| Fstl1     | 0.57 | 0.00 | 0.00 | 0.67 | 0.45 | 20 | Matrix Fibroblast |
| Chkb      | 0.78 | 0.00 | 0.00 | 0.26 | 0.10 | 20 | Matrix Fibroblast |
| Mettl7a1  | 0.91 | 0.00 | 0.00 | 0.42 | 0.22 | 20 | Matrix Fibroblast |
| Nrip1     | 0.88 | 0.00 | 0.00 | 0.29 | 0.12 | 20 | Matrix Fibroblast |
| Igf1      | 0.89 | 0.00 | 0.00 | 0.32 | 0.14 | 20 | Matrix Fibroblast |
| Sfrs18    | 0.68 | 0.00 | 0.00 | 0.72 | 0.59 | 20 | Matrix Fibroblast |
| Col4a1    | 0.49 | 0.00 | 0.00 | 0.73 | 0.49 | 20 | Matrix Fibroblast |
| Hba-a2    | 0.41 | 0.00 | 0.00 | 0.86 | 0.70 | 20 | Matrix Fibroblast |
| Wnt5a     | 0.67 | 0.00 | 0.00 | 0.28 | 0.10 | 20 | Matrix Fibroblast |
| Tcf25     | 0.67 | 0.00 | 0.00 | 0.67 | 0.51 | 20 | Matrix Fibroblast |
| Mxra8     | 0.69 | 0.00 | 0.00 | 0.36 | 0.16 | 20 | Matrix Fibroblast |
| Mmp2      | 0.71 | 0.00 | 0.00 | 0.32 | 0.14 | 20 | Matrix Fibroblast |
| Hba-a1    | 0.41 | 0.00 | 0.00 | 0.88 | 0.70 | 20 | Matrix Fibroblast |
| Clk1      | 0.70 | 0.00 | 0.00 | 0.54 | 0.35 | 20 | Matrix Fibroblast |
| Gabarapl1 | 0.79 | 0.00 | 0.00 | 0.33 | 0.16 | 20 | Matrix Fibroblast |
| Celf2     | 0.74 | 0.00 | 0.00 | 0.47 | 0.28 | 20 | Matrix Fibroblast |
| Id2       | 1.00 | 0.00 | 0.00 | 0.52 | 0.33 | 20 | Matrix Fibroblast |
| Hbb-bs    | 0.30 | 0.00 | 0.00 | 0.94 | 0.81 | 20 | Matrix Fibroblast |
| Med13l    | 0.78 | 0.00 | 0.00 | 0.28 | 0.12 | 20 | Matrix Fibroblast |
| Cd81      | 0.62 | 0.00 | 0.00 | 0.59 | 0.41 | 20 | Matrix Fibroblast |
| Clip1     | 0.77 | 0.00 | 0.00 | 0.39 | 0.21 | 20 | Matrix Fibroblast |
| Grb10     | 0.76 | 0.00 | 0.00 | 0.33 | 0.16 | 20 | Matrix Fibroblast |
| Mllt3     | 0.86 | 0.00 | 0.00 | 0.26 | 0.11 | 20 | Matrix Fibroblast |
| Mpzl1     | 0.74 | 0.00 | 0.00 | 0.26 | 0.11 | 20 | Matrix Fibroblast |
| Ghr       | 0.74 | 0.00 | 0.00 | 0.31 | 0.15 | 20 | Matrix Fibroblast |
| Luc7l2    | 0.71 | 0.00 | 0.00 | 0.55 | 0.39 | 20 | Matrix Fibroblast |
| Rb1cc1    | 0.79 | 0.00 | 0.00 | 0.47 | 0.30 | 20 | Matrix Fibroblast |
| Btg1      | 0.67 | 0.00 | 0.00 | 0.46 | 0.28 | 20 | Matrix Fibroblast |
| Timp3     | 0.37 | 0.00 | 0.00 | 0.56 | 0.36 | 20 | Matrix Fibroblast |
| Hmgb1     | 0.48 | 0.00 | 0.00 | 0.74 | 0.61 | 20 | Matrix Fibroblast |
| Zcchc11   | 0.69 | 0.00 | 0.00 | 0.36 | 0.21 | 20 | Matrix Fibroblast |
| Pmp22     | 0.48 | 0.00 | 0.00 | 0.50 | 0.32 | 20 | Matrix Fibroblast |
| Col4a2    | 0.43 | 0.00 | 0.00 | 0.61 | 0.43 | 20 | Matrix Fibroblast |
| Ccnl2     | 0.68 | 0.00 | 0.00 | 0.40 | 0.24 | 20 | Matrix Fibroblast |
| Nexn      | 0.65 | 0.00 | 0.00 | 0.39 | 0.22 | 20 | Matrix Fibroblast |
| Ubb       | 0.37 | 0.00 | 0.00 | 0.87 | 0.81 | 20 | Matrix Fibroblast |
| Zfp503    | 0.74 | 0.00 | 0.00 | 0.30 | 0.15 | 20 | Matrix Fibroblast |
| Jund      | 0.69 | 0.00 | 0.00 | 0.43 | 0.28 | 20 | Matrix Fibroblast |
| Map1lc3a  | 0.64 | 0.00 | 0.00 | 0.35 | 0.20 | 20 | Matrix Fibroblast |

|          |      |      |      |      |      |    |                   |
|----------|------|------|------|------|------|----|-------------------|
| Txnip    | 0.69 | 0.00 | 0.00 | 0.41 | 0.25 | 20 | Matrix Fibroblast |
| Mef2a    | 0.69 | 0.00 | 0.00 | 0.50 | 0.36 | 20 | Matrix Fibroblast |
| Serpine2 | 0.46 | 0.00 | 0.00 | 0.44 | 0.25 | 20 | Matrix Fibroblast |
| Pik3r1   | 0.70 | 0.00 | 0.00 | 0.26 | 0.13 | 20 | Matrix Fibroblast |
| Arglu1   | 0.58 | 0.00 | 0.00 | 0.55 | 0.42 | 20 | Matrix Fibroblast |
| Hbb-bt   | 0.28 | 0.00 | 0.00 | 0.85 | 0.71 | 20 | Matrix Fibroblast |
| Ilk      | 0.67 | 0.00 | 0.00 | 0.37 | 0.23 | 20 | Matrix Fibroblast |
| Map1lc3b | 0.57 | 0.00 | 0.00 | 0.53 | 0.40 | 20 | Matrix Fibroblast |
| Pnrc1    | 0.65 | 0.00 | 0.00 | 0.34 | 0.20 | 20 | Matrix Fibroblast |
| Tbx3     | 0.49 | 0.00 | 0.00 | 0.36 | 0.21 | 20 | Matrix Fibroblast |
| Camk2n1  | 0.63 | 0.00 | 0.00 | 0.27 | 0.15 | 20 | Matrix Fibroblast |
| Lhfp     | 0.55 | 0.00 | 0.00 | 0.29 | 0.16 | 20 | Matrix Fibroblast |
| Rhoc     | 0.53 | 0.00 | 0.00 | 0.35 | 0.21 | 20 | Matrix Fibroblast |
| Nfkbia   | 0.52 | 0.00 | 0.00 | 0.51 | 0.37 | 20 | Matrix Fibroblast |
| mt-Cytb  | 0.28 | 0.00 | 0.00 | 0.88 | 0.82 | 20 | Matrix Fibroblast |
| Peg3     | 0.37 | 0.00 | 0.00 | 0.47 | 0.30 | 20 | Matrix Fibroblast |
| Tmem59   | 0.54 | 0.00 | 0.00 | 0.52 | 0.41 | 20 | Matrix Fibroblast |
| Csrp1    | 0.60 | 0.00 | 0.00 | 0.29 | 0.17 | 20 | Matrix Fibroblast |
| Tmem50a  | 0.48 | 0.00 | 0.00 | 0.57 | 0.45 | 20 | Matrix Fibroblast |
| Eif1     | 0.34 | 0.00 | 0.00 | 0.74 | 0.67 | 20 | Matrix Fibroblast |
| Ube2b    | 0.57 | 0.00 | 0.00 | 0.48 | 0.36 | 20 | Matrix Fibroblast |
| Dnajc3   | 0.57 | 0.00 | 0.00 | 0.39 | 0.27 | 20 | Matrix Fibroblast |
| Morf4l1  | 0.43 | 0.00 | 0.00 | 0.64 | 0.55 | 20 | Matrix Fibroblast |
| Zeb2     | 0.50 | 0.00 | 0.00 | 0.46 | 0.31 | 20 | Matrix Fibroblast |
| Nupr1    | 0.44 | 0.00 | 0.00 | 0.32 | 0.18 | 20 | Matrix Fibroblast |
| Zmym5    | 0.63 | 0.00 | 0.00 | 0.32 | 0.20 | 20 | Matrix Fibroblast |
| Arid4b   | 0.65 | 0.00 | 0.00 | 0.45 | 0.34 | 20 | Matrix Fibroblast |
| Cald1    | 0.38 | 0.00 | 0.00 | 0.56 | 0.41 | 20 | Matrix Fibroblast |
| Cd44     | 0.59 | 0.00 | 0.00 | 0.32 | 0.20 | 20 | Matrix Fibroblast |
| Csrp2    | 0.51 | 0.00 | 0.00 | 0.29 | 0.17 | 20 | Matrix Fibroblast |
| Smc5     | 0.71 | 0.00 | 0.00 | 0.28 | 0.16 | 20 | Matrix Fibroblast |
| Slc43a3  | 0.56 | 0.00 | 0.00 | 0.35 | 0.22 | 20 | Matrix Fibroblast |
| Srrm2    | 0.45 | 0.00 | 0.00 | 0.67 | 0.61 | 20 | Matrix Fibroblast |
| Luc7l3   | 0.53 | 0.00 | 0.00 | 0.62 | 0.57 | 20 | Matrix Fibroblast |
| Ginm1    | 0.65 | 0.00 | 0.00 | 0.35 | 0.23 | 20 | Matrix Fibroblast |
| Nfib     | 0.41 | 0.00 | 0.00 | 0.60 | 0.47 | 20 | Matrix Fibroblast |
| Tagln    | 0.47 | 0.00 | 0.00 | 0.27 | 0.15 | 20 | Matrix Fibroblast |
| Pnn      | 0.47 | 0.00 | 0.00 | 0.61 | 0.54 | 20 | Matrix Fibroblast |
| Arid5b   | 0.65 | 0.00 | 0.00 | 0.34 | 0.22 | 20 | Matrix Fibroblast |
| Zfr      | 0.59 | 0.00 | 0.00 | 0.39 | 0.29 | 20 | Matrix Fibroblast |
| Vezf1    | 0.58 | 0.00 | 0.00 | 0.35 | 0.24 | 20 | Matrix Fibroblast |
| Gm26384  | 0.33 | 0.00 | 0.00 | 0.60 | 0.48 | 20 | Matrix Fibroblast |
| Fth1     | 0.31 | 0.00 | 0.00 | 0.85 | 0.81 | 20 | Matrix Fibroblast |

|          |      |      |      |      |      |    |                   |
|----------|------|------|------|------|------|----|-------------------|
| Rbm39    | 0.35 | 0.00 | 0.00 | 0.74 | 0.72 | 20 | Matrix Fibroblast |
| Rbbp6    | 0.58 | 0.00 | 0.00 | 0.45 | 0.35 | 20 | Matrix Fibroblast |
| Slc38a2  | 0.58 | 0.00 | 0.00 | 0.29 | 0.19 | 20 | Matrix Fibroblast |
| Kmt2e    | 0.53 | 0.00 | 0.00 | 0.50 | 0.43 | 20 | Matrix Fibroblast |
| Atrx     | 0.45 | 0.00 | 0.00 | 0.68 | 0.66 | 20 | Matrix Fibroblast |
| Vimp     | 0.56 | 0.00 | 0.00 | 0.39 | 0.30 | 20 | Matrix Fibroblast |
| Sec62    | 0.45 | 0.00 | 0.00 | 0.52 | 0.45 | 20 | Matrix Fibroblast |
| Rbpms    | 0.50 | 0.00 | 0.00 | 0.28 | 0.19 | 20 | Matrix Fibroblast |
| Ccar1    | 0.54 | 0.00 | 0.00 | 0.41 | 0.33 | 20 | Matrix Fibroblast |
| Gnas     | 0.28 | 0.00 | 0.00 | 0.72 | 0.67 | 20 | Matrix Fibroblast |
| Fendrr   | 0.29 | 0.00 | 0.00 | 0.32 | 0.20 | 20 | Matrix Fibroblast |
| Lmna     | 0.51 | 0.00 | 0.00 | 0.30 | 0.20 | 20 | Matrix Fibroblast |
| Laptm4a  | 0.39 | 0.00 | 0.00 | 0.59 | 0.52 | 20 | Matrix Fibroblast |
| Ptms     | 0.36 | 0.00 | 0.00 | 0.49 | 0.40 | 20 | Matrix Fibroblast |
| Maged1   | 0.45 | 0.00 | 0.00 | 0.28 | 0.18 | 20 | Matrix Fibroblast |
| Cir1     | 0.46 | 0.00 | 0.00 | 0.30 | 0.21 | 20 | Matrix Fibroblast |
| Mmp14    | 0.40 | 0.00 | 0.00 | 0.35 | 0.25 | 20 | Matrix Fibroblast |
| Cd63     | 0.37 | 0.00 | 0.00 | 0.39 | 0.30 | 20 | Matrix Fibroblast |
| Sf3b1    | 0.39 | 0.00 | 0.00 | 0.53 | 0.47 | 20 | Matrix Fibroblast |
| Selk     | 0.45 | 0.00 | 0.00 | 0.40 | 0.32 | 20 | Matrix Fibroblast |
| Srsf5    | 0.32 | 0.00 | 0.00 | 0.56 | 0.51 | 20 | Matrix Fibroblast |
| Ppap2b   | 0.42 | 0.00 | 0.00 | 0.34 | 0.24 | 20 | Matrix Fibroblast |
| Serinc1  | 0.42 | 0.00 | 0.00 | 0.38 | 0.29 | 20 | Matrix Fibroblast |
| Itgb1    | 0.25 | 0.00 | 0.00 | 0.69 | 0.63 | 20 | Matrix Fibroblast |
| Svil     | 0.54 | 0.00 | 0.00 | 0.25 | 0.17 | 20 | Matrix Fibroblast |
| Cirbp    | 0.45 | 0.00 | 0.00 | 0.30 | 0.22 | 20 | Matrix Fibroblast |
| Srsf11   | 0.34 | 0.00 | 0.00 | 0.54 | 0.49 | 20 | Matrix Fibroblast |
| Hp1bp3   | 0.38 | 0.00 | 0.00 | 0.50 | 0.45 | 20 | Matrix Fibroblast |
| Ifitm2   | 0.31 | 0.00 | 0.00 | 0.41 | 0.32 | 20 | Matrix Fibroblast |
| Akap9    | 0.46 | 0.00 | 0.00 | 0.43 | 0.36 | 20 | Matrix Fibroblast |
| Rbms3    | 0.41 | 0.00 | 0.00 | 0.25 | 0.17 | 20 | Matrix Fibroblast |
| Atf4     | 0.46 | 0.00 | 0.00 | 0.35 | 0.28 | 20 | Matrix Fibroblast |
| Sdc4     | 0.35 | 0.00 | 0.00 | 0.32 | 0.23 | 20 | Matrix Fibroblast |
| Tmem176b | 0.41 | 0.00 | 0.00 | 0.42 | 0.34 | 20 | Matrix Fibroblast |
| Ppic     | 0.30 | 0.00 | 0.00 | 0.47 | 0.38 | 20 | Matrix Fibroblast |
| Mxd4     | 0.43 | 0.00 | 0.01 | 0.44 | 0.38 | 20 | Matrix Fibroblast |
| Eea1     | 0.50 | 0.00 | 0.01 | 0.28 | 0.21 | 20 | Matrix Fibroblast |
| Tsc22d1  | 0.41 | 0.00 | 0.01 | 0.41 | 0.34 | 20 | Matrix Fibroblast |
| Ik       | 0.45 | 0.00 | 0.01 | 0.41 | 0.36 | 20 | Matrix Fibroblast |
| Ssr3     | 0.41 | 0.00 | 0.01 | 0.37 | 0.31 | 20 | Matrix Fibroblast |
| Gas5     | 0.31 | 0.00 | 0.02 | 0.57 | 0.54 | 20 | Matrix Fibroblast |
| Brd3     | 0.40 | 0.00 | 0.02 | 0.32 | 0.25 | 20 | Matrix Fibroblast |
| Wbp5     | 0.25 | 0.00 | 0.02 | 0.56 | 0.48 | 20 | Matrix Fibroblast |

|          |      |      |      |      |      |    |                   |
|----------|------|------|------|------|------|----|-------------------|
| Dek      | 0.34 | 0.00 | 0.03 | 0.54 | 0.50 | 20 | Matrix Fibroblast |
| Sfpq     | 0.37 | 0.00 | 0.03 | 0.42 | 0.37 | 20 | Matrix Fibroblast |
| Bgn      | 0.26 | 0.00 | 0.03 | 0.33 | 0.24 | 20 | Matrix Fibroblast |
| Sfr1     | 0.49 | 0.00 | 0.03 | 0.39 | 0.34 | 20 | Matrix Fibroblast |
| Prrc2c   | 0.34 | 0.00 | 0.04 | 0.64 | 0.63 | 20 | Matrix Fibroblast |
| Pf4      | 3.38 | 0.00 | 0.00 | 0.69 | 0.02 | 21 | Macrophage        |
| C1qc     | 3.05 | 0.00 | 0.00 | 0.75 | 0.01 | 21 | Macrophage        |
| C1qb     | 3.04 | 0.00 | 0.00 | 0.77 | 0.01 | 21 | Macrophage        |
| C1qa     | 2.82 | 0.00 | 0.00 | 0.71 | 0.01 | 21 | Macrophage        |
| Mrc1     | 2.68 | 0.00 | 0.00 | 0.67 | 0.02 | 21 | Macrophage        |
| Ms4a7    | 2.40 | 0.00 | 0.00 | 0.56 | 0.01 | 21 | Macrophage        |
| Cx3cr1   | 2.22 | 0.00 | 0.00 | 0.58 | 0.03 | 21 | Macrophage        |
| Dab2     | 2.17 | 0.00 | 0.00 | 0.62 | 0.07 | 21 | Macrophage        |
| F13a1    | 2.04 | 0.00 | 0.00 | 0.47 | 0.02 | 21 | Macrophage        |
| Fcrls    | 1.95 | 0.00 | 0.00 | 0.47 | 0.00 | 21 | Macrophage        |
| Aif1     | 1.92 | 0.00 | 0.00 | 0.59 | 0.03 | 21 | Macrophage        |
| Ccl12    | 1.86 | 0.00 | 0.00 | 0.26 | 0.00 | 21 | Macrophage        |
| Stab1    | 1.85 | 0.00 | 0.00 | 0.49 | 0.04 | 21 | Macrophage        |
| Csf1r    | 1.84 | 0.00 | 0.00 | 0.58 | 0.04 | 21 | Macrophage        |
| Fcer1g   | 1.79 | 0.00 | 0.00 | 0.83 | 0.11 | 21 | Macrophage        |
| Ctss     | 1.77 | 0.00 | 0.00 | 0.87 | 0.14 | 21 | Macrophage        |
| Hpgds    | 1.73 | 0.00 | 0.00 | 0.44 | 0.01 | 21 | Macrophage        |
| Laptn5   | 1.65 | 0.00 | 0.00 | 0.79 | 0.13 | 21 | Macrophage        |
| Gatm     | 1.61 | 0.00 | 0.00 | 0.41 | 0.01 | 21 | Macrophage        |
| Ms4a6c   | 1.58 | 0.00 | 0.00 | 0.59 | 0.06 | 21 | Macrophage        |
| Tyrobp   | 1.49 | 0.00 | 0.00 | 0.80 | 0.12 | 21 | Macrophage        |
| C3ar1    | 1.45 | 0.00 | 0.00 | 0.39 | 0.01 | 21 | Macrophage        |
| Fcgr3    | 1.45 | 0.00 | 0.00 | 0.48 | 0.04 | 21 | Macrophage        |
| Clec4n   | 1.38 | 0.00 | 0.00 | 0.36 | 0.02 | 21 | Macrophage        |
| Ccr1     | 1.35 | 0.00 | 0.00 | 0.42 | 0.03 | 21 | Macrophage        |
| Fcgr2b   | 1.34 | 0.00 | 0.00 | 0.41 | 0.03 | 21 | Macrophage        |
| Clec4a2  | 1.27 | 0.00 | 0.00 | 0.40 | 0.03 | 21 | Macrophage        |
| Emr1     | 1.25 | 0.00 | 0.00 | 0.31 | 0.01 | 21 | Macrophage        |
| Gpr65    | 1.23 | 0.00 | 0.00 | 0.31 | 0.02 | 21 | Macrophage        |
| Al607873 | 1.17 | 0.00 | 0.00 | 0.35 | 0.03 | 21 | Macrophage        |
| Trem2    | 1.07 | 0.00 | 0.00 | 0.28 | 0.01 | 21 | Macrophage        |
| Ms4a6d   | 1.00 | 0.00 | 0.00 | 0.28 | 0.02 | 21 | Macrophage        |
| Ly86     | 1.51 | 0.00 | 0.00 | 0.52 | 0.06 | 21 | Macrophage        |
| Fcgr1    | 0.93 | 0.00 | 0.00 | 0.26 | 0.02 | 21 | Macrophage        |
| Lgmn     | 2.02 | 0.00 | 0.00 | 0.65 | 0.12 | 21 | Macrophage        |
| Apoe     | 3.29 | 0.00 | 0.00 | 0.87 | 0.28 | 21 | Macrophage        |
| Ms4a6b   | 1.25 | 0.00 | 0.00 | 0.47 | 0.06 | 21 | Macrophage        |
| Msr1     | 0.92 | 0.00 | 0.00 | 0.26 | 0.02 | 21 | Macrophage        |

|          |      |      |      |      |      |    |            |
|----------|------|------|------|------|------|----|------------|
| Cyth4    | 1.10 | 0.00 | 0.00 | 0.38 | 0.04 | 21 | Macrophage |
| Maf      | 2.10 | 0.00 | 0.00 | 0.76 | 0.19 | 21 | Macrophage |
| Unc93b1  | 1.25 | 0.00 | 0.00 | 0.49 | 0.07 | 21 | Macrophage |
| Pla2g7   | 1.32 | 0.00 | 0.00 | 0.42 | 0.05 | 21 | Macrophage |
| Cybb     | 1.05 | 0.00 | 0.00 | 0.56 | 0.09 | 21 | Macrophage |
| Clec4a3  | 0.99 | 0.00 | 0.00 | 0.35 | 0.04 | 21 | Macrophage |
| Lst1     | 1.17 | 0.00 | 0.00 | 0.45 | 0.06 | 21 | Macrophage |
| Ctsb     | 1.83 | 0.00 | 0.00 | 0.83 | 0.27 | 21 | Macrophage |
| Cd68     | 1.00 | 0.00 | 0.00 | 0.29 | 0.03 | 21 | Macrophage |
| AF251705 | 0.89 | 0.00 | 0.00 | 0.28 | 0.03 | 21 | Macrophage |
| Cxcl16   | 1.19 | 0.00 | 0.00 | 0.32 | 0.04 | 21 | Macrophage |
| Ctsc     | 1.47 | 0.00 | 0.00 | 0.71 | 0.19 | 21 | Macrophage |
| Cd300a   | 0.85 | 0.00 | 0.00 | 0.31 | 0.04 | 21 | Macrophage |
| Mafb     | 1.16 | 0.00 | 0.00 | 0.26 | 0.03 | 21 | Macrophage |
| Cst3     | 1.48 | 0.00 | 0.00 | 0.96 | 0.59 | 21 | Macrophage |
| Evi2a    | 0.95 | 0.00 | 0.00 | 0.28 | 0.03 | 21 | Macrophage |
| Pld4     | 0.92 | 0.00 | 0.00 | 0.37 | 0.05 | 21 | Macrophage |
| Spi1     | 0.93 | 0.00 | 0.00 | 0.40 | 0.06 | 21 | Macrophage |
| Myo5a    | 1.19 | 0.00 | 0.00 | 0.40 | 0.07 | 21 | Macrophage |
| Hexb     | 1.20 | 0.00 | 0.00 | 0.42 | 0.07 | 21 | Macrophage |
| Rgs10    | 1.16 | 0.00 | 0.00 | 0.49 | 0.10 | 21 | Macrophage |
| Mpeg1    | 1.05 | 0.00 | 0.00 | 0.42 | 0.07 | 21 | Macrophage |
| Arrb2    | 1.11 | 0.00 | 0.00 | 0.39 | 0.06 | 21 | Macrophage |
| Bcl2a1b  | 1.02 | 0.00 | 0.00 | 0.41 | 0.07 | 21 | Macrophage |
| Cd14     | 1.17 | 0.00 | 0.00 | 0.26 | 0.03 | 21 | Macrophage |
| Trf      | 1.18 | 0.00 | 0.00 | 0.47 | 0.10 | 21 | Macrophage |
| Bcl2a1d  | 1.02 | 0.00 | 0.00 | 0.42 | 0.08 | 21 | Macrophage |
| Tmsb4x   | 0.95 | 0.00 | 0.00 | 1.00 | 0.89 | 21 | Macrophage |
| Sepp1    | 1.79 | 0.00 | 0.00 | 0.81 | 0.41 | 21 | Macrophage |
| Sirpa    | 1.01 | 0.00 | 0.00 | 0.36 | 0.07 | 21 | Macrophage |
| Grn      | 1.24 | 0.00 | 0.00 | 0.52 | 0.13 | 21 | Macrophage |
| Cfp      | 1.14 | 0.00 | 0.00 | 0.30 | 0.05 | 21 | Macrophage |
| Ifi204   | 0.86 | 0.00 | 0.00 | 0.32 | 0.05 | 21 | Macrophage |
| Cfh      | 0.93 | 0.00 | 0.00 | 0.30 | 0.05 | 21 | Macrophage |
| Cd84     | 0.91 | 0.00 | 0.00 | 0.31 | 0.05 | 21 | Macrophage |
| Ptpn18   | 1.07 | 0.00 | 0.00 | 0.53 | 0.14 | 21 | Macrophage |
| Bcl2a1a  | 0.87 | 0.00 | 0.00 | 0.36 | 0.06 | 21 | Macrophage |
| Fcgrt    | 1.18 | 0.00 | 0.00 | 0.42 | 0.09 | 21 | Macrophage |
| Igsf6    | 0.73 | 0.00 | 0.00 | 0.28 | 0.04 | 21 | Macrophage |
| Lyz2     | 0.42 | 0.00 | 0.00 | 0.77 | 0.26 | 21 | Macrophage |
| B2m      | 0.99 | 0.00 | 0.00 | 0.95 | 0.67 | 21 | Macrophage |
| Fyb      | 1.02 | 0.00 | 0.00 | 0.58 | 0.18 | 21 | Macrophage |
| Psap     | 0.95 | 0.00 | 0.00 | 0.79 | 0.36 | 21 | Macrophage |

|          |      |      |      |      |      |    |            |
|----------|------|------|------|------|------|----|------------|
| Ptplad2  | 0.85 | 0.00 | 0.00 | 0.28 | 0.05 | 21 | Macrophage |
| Efhd2    | 0.91 | 0.00 | 0.00 | 0.38 | 0.09 | 21 | Macrophage |
| Snx5     | 1.06 | 0.00 | 0.00 | 0.47 | 0.13 | 21 | Macrophage |
| Cyba     | 0.98 | 0.00 | 0.00 | 0.72 | 0.30 | 21 | Macrophage |
| Mnda     | 0.84 | 0.00 | 0.00 | 0.31 | 0.06 | 21 | Macrophage |
| Slfn2    | 0.83 | 0.00 | 0.00 | 0.49 | 0.13 | 21 | Macrophage |
| Irf8     | 0.90 | 0.00 | 0.00 | 0.31 | 0.06 | 21 | Macrophage |
| KCTD12   | 0.90 | 0.00 | 0.00 | 0.34 | 0.07 | 21 | Macrophage |
| Gm13139  | 0.99 | 0.00 | 0.00 | 0.33 | 0.07 | 21 | Macrophage |
| Cotl1    | 0.95 | 0.00 | 0.00 | 0.54 | 0.17 | 21 | Macrophage |
| Gm10116  | 1.10 | 0.00 | 0.00 | 0.88 | 0.62 | 21 | Macrophage |
| Gm13248  | 0.84 | 0.00 | 0.00 | 0.29 | 0.06 | 21 | Macrophage |
| Serinc3  | 1.01 | 0.00 | 0.00 | 0.72 | 0.32 | 21 | Macrophage |
| Gm13251  | 0.87 | 0.00 | 0.00 | 0.27 | 0.05 | 21 | Macrophage |
| Fermt3   | 0.69 | 0.00 | 0.00 | 0.30 | 0.06 | 21 | Macrophage |
| Cd53     | 0.78 | 0.00 | 0.00 | 0.38 | 0.09 | 21 | Macrophage |
| Man2b1   | 0.87 | 0.00 | 0.00 | 0.31 | 0.07 | 21 | Macrophage |
| Lcp1     | 0.92 | 0.00 | 0.00 | 0.61 | 0.22 | 21 | Macrophage |
| Tm6sf1   | 0.82 | 0.00 | 0.00 | 0.27 | 0.05 | 21 | Macrophage |
| Scamp2   | 1.01 | 0.00 | 0.00 | 0.47 | 0.15 | 21 | Macrophage |
| Arhgap30 | 0.71 | 0.00 | 0.00 | 0.40 | 0.10 | 21 | Macrophage |
| Ap1b1    | 0.81 | 0.00 | 0.00 | 0.25 | 0.05 | 21 | Macrophage |
| Cltb     | 1.01 | 0.00 | 0.00 | 0.77 | 0.43 | 21 | Macrophage |
| Ctsz     | 0.89 | 0.00 | 0.00 | 0.47 | 0.15 | 21 | Macrophage |
| Mndal    | 0.80 | 0.00 | 0.00 | 0.51 | 0.16 | 21 | Macrophage |
| Ctsa     | 0.91 | 0.00 | 0.00 | 0.43 | 0.13 | 21 | Macrophage |
| Ptpn6    | 0.62 | 0.00 | 0.00 | 0.34 | 0.08 | 21 | Macrophage |
| Ftl1     | 1.07 | 0.00 | 0.00 | 0.81 | 0.57 | 21 | Macrophage |
| Alox5ap  | 0.57 | 0.00 | 0.00 | 0.37 | 0.10 | 21 | Macrophage |
| Actb     | 0.49 | 0.00 | 0.00 | 1.00 | 0.98 | 21 | Macrophage |
| Al662270 | 0.73 | 0.00 | 0.00 | 0.30 | 0.07 | 21 | Macrophage |
| Arhgdib  | 0.71 | 0.00 | 0.00 | 0.49 | 0.16 | 21 | Macrophage |
| Hexa     | 0.86 | 0.00 | 0.00 | 0.31 | 0.08 | 21 | Macrophage |
| Sat1     | 0.83 | 0.00 | 0.00 | 0.69 | 0.33 | 21 | Macrophage |
| Hcls1    | 0.70 | 0.00 | 0.00 | 0.30 | 0.07 | 21 | Macrophage |
| Mef2c    | 1.01 | 0.00 | 0.00 | 0.47 | 0.16 | 21 | Macrophage |
| Blvrb    | 0.90 | 0.00 | 0.00 | 0.30 | 0.08 | 21 | Macrophage |
| Snx6     | 1.22 | 0.00 | 0.00 | 0.59 | 0.27 | 21 | Macrophage |
| Abca1    | 0.99 | 0.00 | 0.00 | 0.26 | 0.06 | 21 | Macrophage |
| Ptprc    | 0.61 | 0.00 | 0.00 | 0.46 | 0.15 | 21 | Macrophage |
| Fth1     | 0.68 | 0.00 | 0.00 | 0.93 | 0.81 | 21 | Macrophage |
| Pip4k2a  | 0.70 | 0.00 | 0.00 | 0.26 | 0.06 | 21 | Macrophage |
| Ncf1     | 0.57 | 0.00 | 0.00 | 0.28 | 0.07 | 21 | Macrophage |

|           |      |      |      |      |      |    |            |
|-----------|------|------|------|------|------|----|------------|
| Lilrb4    | 0.64 | 0.00 | 0.00 | 0.26 | 0.06 | 21 | Macrophage |
| Gusb      | 0.73 | 0.00 | 0.00 | 0.30 | 0.08 | 21 | Macrophage |
| Cenpe     | 1.03 | 0.00 | 0.00 | 0.29 | 0.08 | 21 | Macrophage |
| Csf2ra    | 0.63 | 0.00 | 0.00 | 0.26 | 0.06 | 21 | Macrophage |
| Plek      | 0.61 | 0.00 | 0.00 | 0.28 | 0.07 | 21 | Macrophage |
| Birc5     | 0.74 | 0.00 | 0.00 | 0.26 | 0.06 | 21 | Macrophage |
| Ifi30     | 0.73 | 0.00 | 0.00 | 0.35 | 0.11 | 21 | Macrophage |
| Incenp    | 0.73 | 0.00 | 0.00 | 0.29 | 0.08 | 21 | Macrophage |
| Arpc1b    | 0.72 | 0.00 | 0.00 | 0.69 | 0.37 | 21 | Macrophage |
| Ifi27l2a  | 0.83 | 0.00 | 0.00 | 0.32 | 0.09 | 21 | Macrophage |
| Fam105a   | 0.62 | 0.00 | 0.00 | 0.25 | 0.06 | 21 | Macrophage |
| Cd52      | 0.42 | 0.00 | 0.00 | 0.55 | 0.20 | 21 | Macrophage |
| Snx2      | 0.93 | 0.00 | 0.00 | 0.43 | 0.17 | 21 | Macrophage |
| Cltc      | 0.90 | 0.00 | 0.00 | 0.45 | 0.18 | 21 | Macrophage |
| Rps29     | 0.56 | 0.00 | 0.00 | 0.98 | 0.91 | 21 | Macrophage |
| Pycard    | 0.65 | 0.00 | 0.00 | 0.30 | 0.09 | 21 | Macrophage |
| Runx1     | 0.72 | 0.00 | 0.00 | 0.26 | 0.07 | 21 | Macrophage |
| Apbb1ip   | 0.59 | 0.00 | 0.00 | 0.32 | 0.09 | 21 | Macrophage |
| Mki67     | 0.98 | 0.00 | 0.00 | 0.35 | 0.12 | 21 | Macrophage |
| Tgfb1     | 0.83 | 0.00 | 0.00 | 0.27 | 0.08 | 21 | Macrophage |
| Gm9843    | 0.44 | 0.00 | 0.00 | 0.99 | 0.93 | 21 | Macrophage |
| Tpd52     | 0.67 | 0.00 | 0.00 | 0.32 | 0.10 | 21 | Macrophage |
| Coro1a    | 0.55 | 0.00 | 0.00 | 0.32 | 0.10 | 21 | Macrophage |
| Il6ra     | 0.61 | 0.00 | 0.00 | 0.32 | 0.10 | 21 | Macrophage |
| Tnfaip8   | 0.63 | 0.00 | 0.00 | 0.32 | 0.10 | 21 | Macrophage |
| Rnf130    | 0.65 | 0.00 | 0.00 | 0.25 | 0.07 | 21 | Macrophage |
| Ctsd      | 0.82 | 0.00 | 0.00 | 0.51 | 0.25 | 21 | Macrophage |
| H2-D1     | 0.60 | 0.00 | 0.00 | 0.79 | 0.49 | 21 | Macrophage |
| Hist1h2ai | 0.91 | 0.00 | 0.00 | 0.30 | 0.10 | 21 | Macrophage |
| Top2a     | 1.03 | 0.00 | 0.00 | 0.32 | 0.11 | 21 | Macrophage |
| Gpx1      | 0.62 | 0.00 | 0.00 | 0.70 | 0.43 | 21 | Macrophage |
| Gdi2      | 0.79 | 0.00 | 0.00 | 0.59 | 0.33 | 21 | Macrophage |
| Itm2b     | 0.72 | 0.00 | 0.00 | 0.89 | 0.76 | 21 | Macrophage |
| Rnasel    | 0.74 | 0.00 | 0.00 | 0.30 | 0.10 | 21 | Macrophage |
| H2-K1     | 0.68 | 0.00 | 0.00 | 0.62 | 0.32 | 21 | Macrophage |
| Erp29     | 0.70 | 0.00 | 0.00 | 0.52 | 0.26 | 21 | Macrophage |
| Igf1      | 0.79 | 0.00 | 0.00 | 0.36 | 0.14 | 21 | Macrophage |
| Capza2    | 0.78 | 0.00 | 0.00 | 0.60 | 0.35 | 21 | Macrophage |
| Atp6v0c   | 0.77 | 0.00 | 0.00 | 0.50 | 0.25 | 21 | Macrophage |
| Sh3bgrl3  | 0.62 | 0.00 | 0.00 | 0.62 | 0.34 | 21 | Macrophage |
| Asah1     | 0.69 | 0.00 | 0.00 | 0.33 | 0.12 | 21 | Macrophage |
| Ifnar2    | 0.69 | 0.00 | 0.00 | 0.34 | 0.13 | 21 | Macrophage |
| Creg1     | 0.67 | 0.00 | 0.00 | 0.40 | 0.17 | 21 | Macrophage |

|                |      |      |      |      |      |    |            |
|----------------|------|------|------|------|------|----|------------|
| Zfp36l2        | 0.57 | 0.00 | 0.00 | 0.31 | 0.11 | 21 | Macrophage |
| Mt1            | 0.88 | 0.00 | 0.00 | 0.38 | 0.16 | 21 | Macrophage |
| 9930111J21Rik2 | 0.68 | 0.00 | 0.00 | 0.32 | 0.12 | 21 | Macrophage |
| Fam49b         | 0.60 | 0.00 | 0.00 | 0.30 | 0.11 | 21 | Macrophage |
| Snx30          | 0.62 | 0.00 | 0.00 | 0.29 | 0.10 | 21 | Macrophage |
| Ifi203         | 0.55 | 0.00 | 0.00 | 0.36 | 0.14 | 21 | Macrophage |
| Hist1h2af      | 0.83 | 0.00 | 0.00 | 0.27 | 0.09 | 21 | Macrophage |
| Lrrc58         | 0.37 | 0.00 | 0.00 | 0.99 | 0.91 | 21 | Macrophage |
| Hist1h2ap      | 1.09 | 0.00 | 0.00 | 0.35 | 0.15 | 21 | Macrophage |
| Ucp2           | 0.65 | 0.00 | 0.00 | 0.31 | 0.12 | 21 | Macrophage |
| Hist1h2ag      | 0.97 | 0.00 | 0.00 | 0.30 | 0.12 | 21 | Macrophage |
| Arpc2          | 0.54 | 0.00 | 0.00 | 0.78 | 0.61 | 21 | Macrophage |
| Gm26445        | 0.75 | 0.00 | 0.00 | 0.36 | 0.15 | 21 | Macrophage |
| Fam111a        | 0.67 | 0.00 | 0.00 | 0.36 | 0.15 | 21 | Macrophage |
| Hist1h2ao      | 1.13 | 0.00 | 0.00 | 0.35 | 0.15 | 21 | Macrophage |
| Rnase4         | 0.84 | 0.00 | 0.00 | 0.40 | 0.18 | 21 | Macrophage |
| Hist1h2ac      | 0.89 | 0.00 | 0.00 | 0.28 | 0.11 | 21 | Macrophage |
| Fau            | 0.38 | 0.00 | 0.00 | 0.95 | 0.87 | 21 | Macrophage |
| D17H6S56E-5    | 0.58 | 0.00 | 0.00 | 0.29 | 0.11 | 21 | Macrophage |
| Cd74           | 1.06 | 0.00 | 0.00 | 0.32 | 0.13 | 21 | Macrophage |
| Hist1h2ab      | 0.88 | 0.00 | 0.00 | 0.25 | 0.09 | 21 | Macrophage |
| Hist1h2ah      | 0.79 | 0.00 | 0.00 | 0.26 | 0.10 | 21 | Macrophage |
| Arpc4          | 0.61 | 0.00 | 0.00 | 0.39 | 0.18 | 21 | Macrophage |
| Hist1h2ad      | 0.89 | 0.00 | 0.00 | 0.28 | 0.11 | 21 | Macrophage |
| Rac2           | 0.38 | 0.00 | 0.00 | 0.30 | 0.11 | 21 | Macrophage |
| Hist1h2an      | 0.79 | 0.00 | 0.00 | 0.25 | 0.09 | 21 | Macrophage |
| Lyn            | 0.55 | 0.00 | 0.00 | 0.32 | 0.13 | 21 | Macrophage |
| Gm2a           | 0.55 | 0.00 | 0.00 | 0.25 | 0.09 | 21 | Macrophage |
| Marcks         | 0.55 | 0.00 | 0.00 | 0.75 | 0.50 | 21 | Macrophage |
| Pfn1           | 0.59 | 0.00 | 0.00 | 0.67 | 0.46 | 21 | Macrophage |
| Ehd4           | 0.43 | 0.00 | 0.00 | 0.55 | 0.28 | 21 | Macrophage |
| Ptgs1          | 0.65 | 0.00 | 0.00 | 0.27 | 0.10 | 21 | Macrophage |
| Dek            | 0.65 | 0.00 | 0.00 | 0.68 | 0.50 | 21 | Macrophage |
| Rbpj           | 0.56 | 0.00 | 0.00 | 0.27 | 0.10 | 21 | Macrophage |
| Psmb8          | 0.49 | 0.00 | 0.00 | 0.40 | 0.18 | 21 | Macrophage |
| Fam46a         | 0.62 | 0.00 | 0.00 | 0.26 | 0.10 | 21 | Macrophage |
| Tpm3           | 0.45 | 0.00 | 0.00 | 0.84 | 0.70 | 21 | Macrophage |
| Mir692-2a      | 0.80 | 0.00 | 0.00 | 0.39 | 0.19 | 21 | Macrophage |
| Gmfg           | 0.44 | 0.00 | 0.00 | 0.33 | 0.14 | 21 | Macrophage |
| Gbp7           | 0.60 | 0.00 | 0.00 | 0.33 | 0.14 | 21 | Macrophage |
| Tpm3-rs7       | 0.46 | 0.00 | 0.00 | 0.83 | 0.69 | 21 | Macrophage |
| Gm22774        | 0.73 | 0.00 | 0.00 | 0.36 | 0.17 | 21 | Macrophage |
| Prkcd          | 0.48 | 0.00 | 0.00 | 0.28 | 0.11 | 21 | Macrophage |

|          |      |      |      |      |      |    |            |
|----------|------|------|------|------|------|----|------------|
| Actr3    | 0.57 | 0.00 | 0.00 | 0.55 | 0.33 | 21 | Macrophage |
| Lamp1    | 0.58 | 0.00 | 0.00 | 0.63 | 0.42 | 21 | Macrophage |
| Ap2a2    | 0.66 | 0.00 | 0.00 | 0.29 | 0.12 | 21 | Macrophage |
| Gns      | 0.65 | 0.00 | 0.00 | 0.30 | 0.13 | 21 | Macrophage |
| Gng2     | 0.51 | 0.00 | 0.00 | 0.29 | 0.12 | 21 | Macrophage |
| Ptbp3    | 0.49 | 0.00 | 0.00 | 0.59 | 0.36 | 21 | Macrophage |
| Gm22751  | 0.74 | 0.00 | 0.00 | 0.33 | 0.16 | 21 | Macrophage |
| Plin2    | 0.47 | 0.00 | 0.00 | 0.31 | 0.13 | 21 | Macrophage |
| Ifngr1   | 0.51 | 0.00 | 0.00 | 0.44 | 0.24 | 21 | Macrophage |
| Ap2s1    | 0.53 | 0.00 | 0.00 | 0.35 | 0.18 | 21 | Macrophage |
| Clic1    | 0.50 | 0.00 | 0.00 | 0.58 | 0.38 | 21 | Macrophage |
| Zeb2     | 0.49 | 0.00 | 0.00 | 0.53 | 0.31 | 21 | Macrophage |
| Fos      | 0.65 | 0.00 | 0.00 | 0.37 | 0.19 | 21 | Macrophage |
| Bst2     | 0.49 | 0.00 | 0.00 | 0.30 | 0.14 | 21 | Macrophage |
| Coro1b   | 0.58 | 0.00 | 0.00 | 0.43 | 0.24 | 21 | Macrophage |
| Rgs2     | 0.34 | 0.00 | 0.00 | 0.50 | 0.28 | 21 | Macrophage |
| Sft2d1   | 0.54 | 0.00 | 0.00 | 0.28 | 0.13 | 21 | Macrophage |
| H2afz    | 0.58 | 0.00 | 0.00 | 0.57 | 0.40 | 21 | Macrophage |
| Serp1    | 0.48 | 0.00 | 0.00 | 0.41 | 0.23 | 21 | Macrophage |
| Rplp1    | 0.27 | 0.00 | 0.00 | 0.94 | 0.90 | 21 | Macrophage |
| Gm12166  | 0.52 | 0.00 | 0.00 | 0.28 | 0.13 | 21 | Macrophage |
| Actr2    | 0.48 | 0.00 | 0.00 | 0.46 | 0.27 | 21 | Macrophage |
| Nmt1     | 0.51 | 0.00 | 0.00 | 0.41 | 0.23 | 21 | Macrophage |
| Arpc3    | 0.48 | 0.00 | 0.00 | 0.44 | 0.26 | 21 | Macrophage |
| Smc2     | 0.46 | 0.00 | 0.00 | 0.28 | 0.14 | 21 | Macrophage |
| Gm10126  | 0.46 | 0.00 | 0.00 | 0.58 | 0.40 | 21 | Macrophage |
| Dusp6    | 0.58 | 0.00 | 0.00 | 0.34 | 0.18 | 21 | Macrophage |
| Zfp36    | 0.64 | 0.00 | 0.00 | 0.32 | 0.17 | 21 | Macrophage |
| Atp6v0b  | 0.55 | 0.00 | 0.00 | 0.35 | 0.19 | 21 | Macrophage |
| Arpc5    | 0.41 | 0.00 | 0.00 | 0.71 | 0.56 | 21 | Macrophage |
| Emp3     | 0.45 | 0.00 | 0.00 | 0.38 | 0.21 | 21 | Macrophage |
| Gm4070   | 0.31 | 0.00 | 0.00 | 0.26 | 0.12 | 21 | Macrophage |
| Cd302    | 0.42 | 0.00 | 0.00 | 0.30 | 0.15 | 21 | Macrophage |
| Hmgb2    | 0.75 | 0.00 | 0.00 | 0.55 | 0.43 | 21 | Macrophage |
| Gas6     | 0.66 | 0.00 | 0.00 | 0.28 | 0.15 | 21 | Macrophage |
| Gm10073  | 0.26 | 0.00 | 0.00 | 0.92 | 0.86 | 21 | Macrophage |
| Tmem176b | 0.60 | 0.00 | 0.00 | 0.49 | 0.34 | 21 | Macrophage |
| M6pr     | 0.46 | 0.00 | 0.00 | 0.39 | 0.23 | 21 | Macrophage |
| Ccdc50   | 0.58 | 0.00 | 0.00 | 0.42 | 0.26 | 21 | Macrophage |
| Atp2b1   | 0.43 | 0.00 | 0.00 | 0.73 | 0.59 | 21 | Macrophage |
| Cfl1     | 0.37 | 0.00 | 0.00 | 0.71 | 0.58 | 21 | Macrophage |
| Atox1    | 0.46 | 0.00 | 0.00 | 0.53 | 0.37 | 21 | Macrophage |
| Ppt1     | 0.38 | 0.00 | 0.00 | 0.26 | 0.12 | 21 | Macrophage |

|          |      |      |      |      |      |    |            |
|----------|------|------|------|------|------|----|------------|
| Sdcbp    | 0.46 | 0.00 | 0.00 | 0.44 | 0.28 | 21 | Macrophage |
| Cyfip1   | 0.51 | 0.00 | 0.00 | 0.30 | 0.16 | 21 | Macrophage |
| Cd63     | 0.62 | 0.00 | 0.00 | 0.44 | 0.30 | 21 | Macrophage |
| Nucks1   | 0.47 | 0.00 | 0.00 | 0.44 | 0.28 | 21 | Macrophage |
| Tor1aip1 | 0.47 | 0.00 | 0.00 | 0.33 | 0.19 | 21 | Macrophage |
| Arl6ip1  | 0.38 | 0.00 | 0.00 | 0.68 | 0.52 | 21 | Macrophage |
| Rin2     | 0.46 | 0.00 | 0.00 | 0.29 | 0.16 | 21 | Macrophage |
| Tab2     | 0.48 | 0.00 | 0.00 | 0.38 | 0.23 | 21 | Macrophage |
| Ivns1abp | 0.40 | 0.00 | 0.00 | 0.38 | 0.22 | 21 | Macrophage |
| Sec11c   | 0.34 | 0.00 | 0.00 | 0.32 | 0.18 | 21 | Macrophage |
| Ier3     | 0.83 | 0.00 | 0.00 | 0.25 | 0.14 | 21 | Macrophage |
| Akap13   | 0.38 | 0.00 | 0.00 | 0.42 | 0.27 | 21 | Macrophage |
| Atp6ap2  | 0.48 | 0.00 | 0.00 | 0.28 | 0.15 | 21 | Macrophage |
| Ccdc34   | 0.36 | 0.00 | 0.00 | 0.26 | 0.14 | 21 | Macrophage |
| BC005537 | 0.41 | 0.00 | 0.00 | 0.48 | 0.33 | 21 | Macrophage |
| Hprt     | 0.34 | 0.00 | 0.00 | 0.26 | 0.14 | 21 | Macrophage |
| Egr1     | 0.46 | 0.00 | 0.00 | 0.26 | 0.14 | 21 | Macrophage |
| Celf2    | 0.33 | 0.00 | 0.00 | 0.44 | 0.28 | 21 | Macrophage |
| Smchd1   | 0.38 | 0.00 | 0.00 | 0.29 | 0.16 | 21 | Macrophage |
| Grb2     | 0.33 | 0.00 | 0.00 | 0.31 | 0.18 | 21 | Macrophage |
| Tmed5    | 0.33 | 0.00 | 0.00 | 0.30 | 0.17 | 21 | Macrophage |
| Mycbp2   | 0.38 | 0.00 | 0.00 | 0.38 | 0.23 | 21 | Macrophage |
| H2afy    | 0.38 | 0.00 | 0.00 | 0.33 | 0.20 | 21 | Macrophage |
| Cstb     | 0.42 | 0.00 | 0.00 | 0.41 | 0.28 | 21 | Macrophage |
| Snx3     | 0.38 | 0.00 | 0.00 | 0.47 | 0.33 | 21 | Macrophage |
| Junb     | 0.52 | 0.00 | 0.00 | 0.32 | 0.20 | 21 | Macrophage |
| Akr1a1   | 0.34 | 0.00 | 0.00 | 0.64 | 0.50 | 21 | Macrophage |
| Fkbp2    | 0.35 | 0.00 | 0.00 | 0.31 | 0.18 | 21 | Macrophage |
| Arhgap17 | 0.43 | 0.00 | 0.00 | 0.30 | 0.18 | 21 | Macrophage |
| Stmn1    | 0.34 | 0.00 | 0.00 | 0.37 | 0.24 | 21 | Macrophage |
| Nars     | 0.43 | 0.00 | 0.00 | 0.46 | 0.33 | 21 | Macrophage |
| Irf2bp2  | 0.44 | 0.00 | 0.00 | 0.27 | 0.16 | 21 | Macrophage |
| Rrbp1    | 0.29 | 0.00 | 0.00 | 0.68 | 0.55 | 21 | Macrophage |
| Ctage5   | 0.35 | 0.00 | 0.00 | 0.42 | 0.28 | 21 | Macrophage |
| Limd2    | 0.32 | 0.00 | 0.00 | 0.27 | 0.15 | 21 | Macrophage |
| Itgam    | 0.34 | 0.00 | 0.00 | 0.41 | 0.28 | 21 | Macrophage |
| Gnai2    | 0.29 | 0.00 | 0.00 | 0.54 | 0.39 | 21 | Macrophage |
| Calr     | 0.30 | 0.00 | 0.00 | 0.57 | 0.43 | 21 | Macrophage |
| Tmem256  | 0.34 | 0.00 | 0.00 | 0.46 | 0.33 | 21 | Macrophage |
| Gabarap  | 0.37 | 0.00 | 0.00 | 0.56 | 0.44 | 21 | Macrophage |
| Taldo1   | 0.27 | 0.00 | 0.00 | 0.39 | 0.26 | 21 | Macrophage |
| Cdc42    | 0.25 | 0.00 | 0.00 | 0.68 | 0.54 | 21 | Macrophage |
| Capzb    | 0.33 | 0.00 | 0.00 | 0.54 | 0.42 | 21 | Macrophage |

|               |      |      |      |      |      |    |            |
|---------------|------|------|------|------|------|----|------------|
| Dbi           | 0.35 | 0.00 | 0.00 | 0.50 | 0.37 | 21 | Macrophage |
| Klf6          | 0.29 | 0.00 | 0.00 | 0.49 | 0.36 | 21 | Macrophage |
| Pomp          | 0.33 | 0.00 | 0.00 | 0.43 | 0.32 | 21 | Macrophage |
| Ctsl          | 0.43 | 0.00 | 0.00 | 0.49 | 0.39 | 21 | Macrophage |
| Atp6v1f       | 0.37 | 0.00 | 0.00 | 0.36 | 0.25 | 21 | Macrophage |
| Cox5a         | 0.29 | 0.00 | 0.00 | 0.44 | 0.31 | 21 | Macrophage |
| Reep5         | 0.33 | 0.00 | 0.00 | 0.35 | 0.24 | 21 | Macrophage |
| Taok3         | 0.27 | 0.00 | 0.00 | 0.29 | 0.19 | 21 | Macrophage |
| 2810428I15Rik | 0.29 | 0.00 | 0.00 | 0.30 | 0.20 | 21 | Macrophage |
| Anp32b        | 0.41 | 0.00 | 0.00 | 0.57 | 0.50 | 21 | Macrophage |
| Hspa8         | 0.26 | 0.00 | 0.00 | 0.76 | 0.67 | 21 | Macrophage |
| Igfbp4        | 0.31 | 0.00 | 0.00 | 0.37 | 0.25 | 21 | Macrophage |
| Ostf1         | 0.26 | 0.00 | 0.00 | 0.38 | 0.26 | 21 | Macrophage |
| Magt1         | 0.29 | 0.00 | 0.00 | 0.30 | 0.20 | 21 | Macrophage |
| Ik            | 0.29 | 0.00 | 0.00 | 0.47 | 0.36 | 21 | Macrophage |
| Lamp2         | 0.36 | 0.00 | 0.00 | 0.37 | 0.26 | 21 | Macrophage |
| Brk1          | 0.29 | 0.00 | 0.00 | 0.37 | 0.26 | 21 | Macrophage |
| Psme2b        | 0.27 | 0.00 | 0.00 | 0.41 | 0.30 | 21 | Macrophage |
| Tsc22d4       | 0.26 | 0.00 | 0.01 | 0.39 | 0.28 | 21 | Macrophage |
| Rnaset2b      | 0.39 | 0.00 | 0.02 | 0.35 | 0.26 | 21 | Macrophage |
| Rtn4          | 0.30 | 0.00 | 0.02 | 0.33 | 0.24 | 21 | Macrophage |
| Ran           | 0.28 | 0.00 | 0.02 | 0.48 | 0.38 | 21 | Macrophage |
| Rnaset2a      | 0.39 | 0.00 | 0.02 | 0.35 | 0.26 | 21 | Macrophage |
| Gm10282       | 0.28 | 0.00 | 0.02 | 0.50 | 0.40 | 21 | Macrophage |
| Pak2          | 0.28 | 0.00 | 0.02 | 0.40 | 0.29 | 21 | Macrophage |
| Gm26924       | 0.35 | 0.00 | 0.03 | 0.65 | 0.57 | 21 | Macrophage |
| Etfb          | 0.28 | 0.00 | 0.03 | 0.39 | 0.28 | 21 | Macrophage |
| S100a9        | 5.52 | 0.00 | 0.00 | 0.94 | 0.06 | 22 | Neutrophil |
| Stfa1         | 5.43 | 0.00 | 0.00 | 0.93 | 0.05 | 22 | Neutrophil |
| BC100530      | 5.43 | 0.00 | 0.00 | 0.93 | 0.04 | 22 | Neutrophil |
| S100a8        | 5.09 | 0.00 | 0.00 | 0.99 | 0.10 | 22 | Neutrophil |
| BC117090      | 4.86 | 0.00 | 0.00 | 0.89 | 0.02 | 22 | Neutrophil |
| Gm5483        | 4.83 | 0.00 | 0.00 | 0.97 | 0.03 | 22 | Neutrophil |
| Stfa2l1       | 4.83 | 0.00 | 0.00 | 0.92 | 0.02 | 22 | Neutrophil |
| Stfa2         | 4.73 | 0.00 | 0.00 | 0.88 | 0.02 | 22 | Neutrophil |
| 2010005H15Rik | 4.60 | 0.00 | 0.00 | 0.95 | 0.02 | 22 | Neutrophil |
| Retnlg        | 3.89 | 0.00 | 0.00 | 0.60 | 0.01 | 22 | Neutrophil |
| Stfa3         | 3.66 | 0.00 | 0.00 | 0.66 | 0.02 | 22 | Neutrophil |
| 1100001G20Rik | 3.43 | 0.00 | 0.00 | 0.79 | 0.02 | 22 | Neutrophil |
| Csta          | 3.34 | 0.00 | 0.00 | 0.65 | 0.00 | 22 | Neutrophil |
| Cxcr2         | 2.74 | 0.00 | 0.00 | 0.75 | 0.01 | 22 | Neutrophil |
| Gm5416        | 2.59 | 0.00 | 0.00 | 0.73 | 0.00 | 22 | Neutrophil |
| Il1b          | 2.41 | 0.00 | 0.00 | 0.49 | 0.02 | 22 | Neutrophil |

|               |      |      |      |      |      |    |            |
|---------------|------|------|------|------|------|----|------------|
| Mmp8          | 2.23 | 0.00 | 0.00 | 0.44 | 0.01 | 22 | Neutrophil |
| Gm4758        | 2.15 | 0.00 | 0.00 | 0.49 | 0.00 | 22 | Neutrophil |
| Slpi          | 2.07 | 0.00 | 0.00 | 0.51 | 0.02 | 22 | Neutrophil |
| Tyrobp        | 1.99 | 0.00 | 0.00 | 0.87 | 0.12 | 22 | Neutrophil |
| Alox5ap       | 1.89 | 0.00 | 0.00 | 0.74 | 0.09 | 22 | Neutrophil |
| Pygl          | 1.87 | 0.00 | 0.00 | 0.73 | 0.10 | 22 | Neutrophil |
| Msrb1         | 1.87 | 0.00 | 0.00 | 0.78 | 0.14 | 22 | Neutrophil |
| Csf3r         | 1.83 | 0.00 | 0.00 | 0.48 | 0.01 | 22 | Neutrophil |
| Asprv1        | 1.79 | 0.00 | 0.00 | 0.40 | 0.00 | 22 | Neutrophil |
| Gda           | 1.78 | 0.00 | 0.00 | 0.57 | 0.05 | 22 | Neutrophil |
| Pglyrp1       | 1.75 | 0.00 | 0.00 | 0.49 | 0.02 | 22 | Neutrophil |
| Mmp9          | 1.66 | 0.00 | 0.00 | 0.42 | 0.00 | 22 | Neutrophil |
| Cd300lf       | 1.64 | 0.00 | 0.00 | 0.53 | 0.03 | 22 | Neutrophil |
| Gm15845       | 1.64 | 0.00 | 0.00 | 0.30 | 0.00 | 22 | Neutrophil |
| Il1r2         | 1.63 | 0.00 | 0.00 | 0.33 | 0.01 | 22 | Neutrophil |
| Clec4d        | 1.56 | 0.00 | 0.00 | 0.38 | 0.01 | 22 | Neutrophil |
| Ccr1          | 1.47 | 0.00 | 0.00 | 0.43 | 0.03 | 22 | Neutrophil |
| C5ar1         | 1.40 | 0.00 | 0.00 | 0.41 | 0.02 | 22 | Neutrophil |
| F630028O10Rik | 1.40 | 0.00 | 0.00 | 0.29 | 0.01 | 22 | Neutrophil |
| Slfn1         | 1.39 | 0.00 | 0.00 | 0.36 | 0.02 | 22 | Neutrophil |
| Slfn4         | 1.39 | 0.00 | 0.00 | 0.28 | 0.01 | 22 | Neutrophil |
| AA467197      | 1.37 | 0.00 | 0.00 | 0.31 | 0.01 | 22 | Neutrophil |
| 1810033B17Rik | 1.34 | 0.00 | 0.00 | 0.42 | 0.03 | 22 | Neutrophil |
| Fpr2          | 1.14 | 0.00 | 0.00 | 0.33 | 0.02 | 22 | Neutrophil |
| Cd300ld       | 1.11 | 0.00 | 0.00 | 0.29 | 0.02 | 22 | Neutrophil |
| Fcer1g        | 1.39 | 0.00 | 0.00 | 0.73 | 0.11 | 22 | Neutrophil |
| Gp49a         | 1.39 | 0.00 | 0.00 | 0.46 | 0.05 | 22 | Neutrophil |
| Ncf1          | 1.45 | 0.00 | 0.00 | 0.53 | 0.07 | 22 | Neutrophil |
| Spi1          | 1.39 | 0.00 | 0.00 | 0.52 | 0.06 | 22 | Neutrophil |
| Hp            | 1.50 | 0.00 | 0.00 | 0.67 | 0.11 | 22 | Neutrophil |
| Lilrb4        | 1.40 | 0.00 | 0.00 | 0.49 | 0.06 | 22 | Neutrophil |
| Pilra         | 1.13 | 0.00 | 0.00 | 0.33 | 0.03 | 22 | Neutrophil |
| Gsr           | 1.57 | 0.00 | 0.00 | 0.57 | 0.09 | 22 | Neutrophil |
| Pla2g7        | 1.51 | 0.00 | 0.00 | 0.46 | 0.05 | 22 | Neutrophil |
| Igsf6         | 1.29 | 0.00 | 0.00 | 0.40 | 0.04 | 22 | Neutrophil |
| Lrg1          | 1.14 | 0.00 | 0.00 | 0.28 | 0.02 | 22 | Neutrophil |
| Slfn2         | 1.57 | 0.00 | 0.00 | 0.68 | 0.13 | 22 | Neutrophil |
| Pirb          | 1.18 | 0.00 | 0.00 | 0.36 | 0.04 | 22 | Neutrophil |
| Clec5a        | 1.12 | 0.00 | 0.00 | 0.25 | 0.02 | 22 | Neutrophil |
| Ifitm6        | 1.63 | 0.00 | 0.00 | 0.32 | 0.03 | 22 | Neutrophil |
| Mxd1          | 1.31 | 0.00 | 0.00 | 0.36 | 0.04 | 22 | Neutrophil |
| Tnfaip2       | 1.55 | 0.00 | 0.00 | 0.39 | 0.05 | 22 | Neutrophil |
| Lst1          | 1.26 | 0.00 | 0.00 | 0.46 | 0.06 | 22 | Neutrophil |

|               |      |      |      |      |      |    |            |
|---------------|------|------|------|------|------|----|------------|
| Fcgr3         | 1.08 | 0.00 | 0.00 | 0.37 | 0.04 | 22 | Neutrophil |
| Lcn2          | 2.12 | 0.00 | 0.00 | 0.45 | 0.07 | 22 | Neutrophil |
| Cd52          | 1.31 | 0.00 | 0.00 | 0.79 | 0.20 | 22 | Neutrophil |
| A430104N18Rik | 1.17 | 0.00 | 0.00 | 0.41 | 0.06 | 22 | Neutrophil |
| Ncf2          | 0.99 | 0.00 | 0.00 | 0.33 | 0.04 | 22 | Neutrophil |
| Grina         | 1.37 | 0.00 | 0.00 | 0.42 | 0.07 | 22 | Neutrophil |
| Arrb2         | 1.07 | 0.00 | 0.00 | 0.40 | 0.06 | 22 | Neutrophil |
| Wfdc17        | 1.54 | 0.00 | 0.00 | 0.30 | 0.04 | 22 | Neutrophil |
| Ccl6          | 1.37 | 0.00 | 0.00 | 0.49 | 0.09 | 22 | Neutrophil |
| Lcp1          | 1.35 | 0.00 | 0.00 | 0.73 | 0.22 | 22 | Neutrophil |
| Ncf4          | 0.93 | 0.00 | 0.00 | 0.28 | 0.03 | 22 | Neutrophil |
| Apobr         | 0.95 | 0.00 | 0.00 | 0.25 | 0.03 | 22 | Neutrophil |
| Cd84          | 1.16 | 0.00 | 0.00 | 0.33 | 0.05 | 22 | Neutrophil |
| Sirpb1c       | 1.03 | 0.00 | 0.00 | 0.27 | 0.03 | 22 | Neutrophil |
| Cd14          | 1.16 | 0.00 | 0.00 | 0.25 | 0.03 | 22 | Neutrophil |
| Srgn          | 1.41 | 0.00 | 0.00 | 0.81 | 0.32 | 22 | Neutrophil |
| Coro1a        | 1.04 | 0.00 | 0.00 | 0.46 | 0.10 | 22 | Neutrophil |
| Ptprc         | 1.04 | 0.00 | 0.00 | 0.58 | 0.14 | 22 | Neutrophil |
| Rac2          | 1.07 | 0.00 | 0.00 | 0.48 | 0.11 | 22 | Neutrophil |
| Anxa1         | 1.62 | 0.00 | 0.00 | 0.60 | 0.18 | 22 | Neutrophil |
| Itgb2         | 0.90 | 0.00 | 0.00 | 0.29 | 0.04 | 22 | Neutrophil |
| Prdx5         | 1.22 | 0.00 | 0.00 | 0.76 | 0.32 | 22 | Neutrophil |
| S100a11       | 1.32 | 0.00 | 0.00 | 0.82 | 0.48 | 22 | Neutrophil |
| S100a6        | 0.90 | 0.00 | 0.00 | 0.77 | 0.31 | 22 | Neutrophil |
| Cyba          | 0.99 | 0.00 | 0.00 | 0.73 | 0.30 | 22 | Neutrophil |
| Fxyd5         | 1.16 | 0.00 | 0.00 | 0.54 | 0.18 | 22 | Neutrophil |
| Fos           | 1.10 | 0.00 | 0.00 | 0.57 | 0.19 | 22 | Neutrophil |
| Arhgdib       | 1.03 | 0.00 | 0.00 | 0.51 | 0.16 | 22 | Neutrophil |
| Junb          | 1.29 | 0.00 | 0.00 | 0.55 | 0.19 | 22 | Neutrophil |
| Csf2ra        | 0.88 | 0.00 | 0.00 | 0.30 | 0.06 | 22 | Neutrophil |
| Apbb1ip       | 0.89 | 0.00 | 0.00 | 0.38 | 0.09 | 22 | Neutrophil |
| Samsn1        | 0.86 | 0.00 | 0.00 | 0.31 | 0.07 | 22 | Neutrophil |
| Tpd52         | 1.05 | 0.00 | 0.00 | 0.39 | 0.10 | 22 | Neutrophil |
| Plek          | 0.98 | 0.00 | 0.00 | 0.31 | 0.07 | 22 | Neutrophil |
| Ptpn6         | 0.91 | 0.00 | 0.00 | 0.34 | 0.08 | 22 | Neutrophil |
| Gmfg          | 0.91 | 0.00 | 0.00 | 0.45 | 0.14 | 22 | Neutrophil |
| 4632428N05Rik | 0.87 | 0.00 | 0.00 | 0.28 | 0.06 | 22 | Neutrophil |
| Taldo1        | 0.92 | 0.00 | 0.00 | 0.62 | 0.26 | 22 | Neutrophil |
| Cdk2ap2       | 1.13 | 0.00 | 0.00 | 0.46 | 0.15 | 22 | Neutrophil |
| Btg2          | 1.04 | 0.00 | 0.00 | 0.57 | 0.23 | 22 | Neutrophil |
| Lyz2          | 0.36 | 0.00 | 0.00 | 0.68 | 0.26 | 22 | Neutrophil |
| Cd44          | 1.00 | 0.00 | 0.00 | 0.52 | 0.20 | 22 | Neutrophil |
| Itgam         | 0.97 | 0.00 | 0.00 | 0.62 | 0.28 | 22 | Neutrophil |

|               |      |      |      |      |      |    |            |
|---------------|------|------|------|------|------|----|------------|
| Stk17b        | 0.80 | 0.00 | 0.00 | 0.28 | 0.06 | 22 | Neutrophil |
| Tmsb4x        | 0.62 | 0.00 | 0.00 | 0.98 | 0.89 | 22 | Neutrophil |
| Fyb           | 0.88 | 0.00 | 0.00 | 0.50 | 0.18 | 22 | Neutrophil |
| Laptm5        | 0.67 | 0.00 | 0.00 | 0.45 | 0.14 | 22 | Neutrophil |
| Zfp36         | 0.95 | 0.00 | 0.00 | 0.46 | 0.16 | 22 | Neutrophil |
| Hmgb2         | 0.75 | 0.00 | 0.00 | 0.77 | 0.42 | 22 | Neutrophil |
| Arpc5         | 0.79 | 0.00 | 0.00 | 0.84 | 0.56 | 22 | Neutrophil |
| Hcls1         | 0.75 | 0.00 | 0.00 | 0.29 | 0.07 | 22 | Neutrophil |
| Cd53          | 0.69 | 0.00 | 0.00 | 0.33 | 0.09 | 22 | Neutrophil |
| Arid3a        | 0.75 | 0.00 | 0.00 | 0.34 | 0.10 | 22 | Neutrophil |
| Thbs1         | 0.92 | 0.00 | 0.00 | 0.39 | 0.13 | 22 | Neutrophil |
| Samhd1        | 0.96 | 0.00 | 0.00 | 0.48 | 0.19 | 22 | Neutrophil |
| Actb          | 0.50 | 0.00 | 0.00 | 1.00 | 0.98 | 22 | Neutrophil |
| Arhgap30      | 0.76 | 0.00 | 0.00 | 0.33 | 0.10 | 22 | Neutrophil |
| Pgd           | 0.76 | 0.00 | 0.00 | 0.34 | 0.11 | 22 | Neutrophil |
| Sat1          | 0.88 | 0.00 | 0.00 | 0.63 | 0.33 | 22 | Neutrophil |
| Hist2h2aa2    | 0.88 | 0.00 | 0.00 | 0.38 | 0.14 | 22 | Neutrophil |
| Btg1          | 1.00 | 0.00 | 0.00 | 0.57 | 0.28 | 22 | Neutrophil |
| Dhrs7         | 0.89 | 0.00 | 0.00 | 0.41 | 0.16 | 22 | Neutrophil |
| Mcl1          | 0.92 | 0.00 | 0.00 | 0.50 | 0.23 | 22 | Neutrophil |
| Adipor1       | 0.91 | 0.00 | 0.00 | 0.51 | 0.24 | 22 | Neutrophil |
| Rgs2          | 0.77 | 0.00 | 0.00 | 0.59 | 0.28 | 22 | Neutrophil |
| Lgals3        | 0.56 | 0.00 | 0.00 | 0.41 | 0.15 | 22 | Neutrophil |
| Cd24a         | 0.76 | 0.00 | 0.00 | 0.37 | 0.13 | 22 | Neutrophil |
| G0s2          | 0.97 | 0.00 | 0.00 | 0.37 | 0.13 | 22 | Neutrophil |
| Cotl1         | 0.81 | 0.00 | 0.00 | 0.43 | 0.17 | 22 | Neutrophil |
| Nudt4         | 0.84 | 0.00 | 0.00 | 0.42 | 0.17 | 22 | Neutrophil |
| Dusp1         | 1.09 | 0.00 | 0.00 | 0.40 | 0.17 | 22 | Neutrophil |
| Bcl2a1d       | 1.37 | 0.00 | 0.00 | 0.27 | 0.08 | 22 | Neutrophil |
| Prr13         | 0.76 | 0.00 | 0.00 | 0.35 | 0.13 | 22 | Neutrophil |
| Trim30a       | 0.87 | 0.00 | 0.00 | 0.26 | 0.08 | 22 | Neutrophil |
| Hist1h2al     | 0.85 | 0.00 | 0.00 | 0.29 | 0.10 | 22 | Neutrophil |
| Pkm           | 0.85 | 0.00 | 0.00 | 0.47 | 0.22 | 22 | Neutrophil |
| Syne1         | 0.72 | 0.00 | 0.00 | 0.30 | 0.11 | 22 | Neutrophil |
| Lrrc58        | 0.51 | 0.00 | 0.00 | 0.98 | 0.91 | 22 | Neutrophil |
| Emb           | 0.63 | 0.00 | 0.00 | 0.31 | 0.11 | 22 | Neutrophil |
| Fam49b        | 0.60 | 0.00 | 0.00 | 0.30 | 0.11 | 22 | Neutrophil |
| Ostf1         | 0.78 | 0.00 | 0.00 | 0.50 | 0.26 | 22 | Neutrophil |
| 2810474O19Rik | 1.05 | 0.00 | 0.00 | 0.50 | 0.26 | 22 | Neutrophil |
| Sh3bgrl3      | 0.62 | 0.00 | 0.00 | 0.61 | 0.34 | 22 | Neutrophil |
| H2-D1         | 0.60 | 0.00 | 0.00 | 0.78 | 0.49 | 22 | Neutrophil |
| Trim12c       | 0.78 | 0.00 | 0.00 | 0.27 | 0.09 | 22 | Neutrophil |
| Arpc1b        | 0.63 | 0.00 | 0.00 | 0.62 | 0.37 | 22 | Neutrophil |

|                |      |      |      |      |      |    |            |
|----------------|------|------|------|------|------|----|------------|
| Pim1           | 0.72 | 0.00 | 0.00 | 0.27 | 0.09 | 22 | Neutrophil |
| Egr1           | 0.88 | 0.00 | 0.00 | 0.33 | 0.14 | 22 | Neutrophil |
| Ier2           | 0.68 | 0.00 | 0.00 | 0.48 | 0.25 | 22 | Neutrophil |
| Gpcpd1         | 0.71 | 0.00 | 0.00 | 0.25 | 0.09 | 22 | Neutrophil |
| Vasp           | 0.69 | 0.00 | 0.00 | 0.39 | 0.19 | 22 | Neutrophil |
| Rhog           | 0.62 | 0.00 | 0.00 | 0.28 | 0.11 | 22 | Neutrophil |
| Cybb           | 0.55 | 0.00 | 0.00 | 0.25 | 0.10 | 22 | Neutrophil |
| Ogfrl1         | 0.65 | 0.00 | 0.00 | 0.25 | 0.10 | 22 | Neutrophil |
| Lsp1           | 0.48 | 0.00 | 0.00 | 0.40 | 0.19 | 22 | Neutrophil |
| Txn1           | 0.51 | 0.00 | 0.00 | 0.70 | 0.50 | 22 | Neutrophil |
| Cap1           | 0.62 | 0.00 | 0.00 | 0.35 | 0.17 | 22 | Neutrophil |
| Fth1           | 0.92 | 0.00 | 0.00 | 0.90 | 0.81 | 22 | Neutrophil |
| Ifitm1         | 0.59 | 0.00 | 0.00 | 0.31 | 0.14 | 22 | Neutrophil |
| Prkcd          | 0.56 | 0.00 | 0.00 | 0.26 | 0.11 | 22 | Neutrophil |
| Klf6           | 0.57 | 0.00 | 0.00 | 0.56 | 0.36 | 22 | Neutrophil |
| Zcchc6         | 0.64 | 0.00 | 0.00 | 0.43 | 0.25 | 22 | Neutrophil |
| Gnai2          | 0.44 | 0.00 | 0.00 | 0.59 | 0.39 | 22 | Neutrophil |
| B2m            | 0.50 | 0.00 | 0.00 | 0.86 | 0.67 | 22 | Neutrophil |
| Jhdm1d         | 0.57 | 0.00 | 0.00 | 0.32 | 0.16 | 22 | Neutrophil |
| Pfn1           | 0.45 | 0.00 | 0.00 | 0.65 | 0.46 | 22 | Neutrophil |
| Nfkbia         | 0.78 | 0.00 | 0.00 | 0.56 | 0.37 | 22 | Neutrophil |
| Ier3           | 0.78 | 0.00 | 0.00 | 0.28 | 0.14 | 22 | Neutrophil |
| Neat1          | 0.46 | 0.00 | 0.00 | 0.47 | 0.27 | 22 | Neutrophil |
| Fam101b        | 0.50 | 0.00 | 0.00 | 0.35 | 0.19 | 22 | Neutrophil |
| Plin2          | 0.73 | 0.00 | 0.00 | 0.28 | 0.13 | 22 | Neutrophil |
| Gpx1           | 0.50 | 0.00 | 0.00 | 0.61 | 0.43 | 22 | Neutrophil |
| Tkt            | 0.48 | 0.00 | 0.00 | 0.29 | 0.15 | 22 | Neutrophil |
| 9930111J21Rik2 | 0.59 | 0.00 | 0.00 | 0.25 | 0.12 | 22 | Neutrophil |
| Lrrfip1        | 0.49 | 0.00 | 0.00 | 0.42 | 0.26 | 22 | Neutrophil |
| mt-Rnr1        | 0.50 | 0.00 | 0.00 | 0.64 | 0.46 | 22 | Neutrophil |
| Ctsd           | 0.58 | 0.00 | 0.00 | 0.40 | 0.25 | 22 | Neutrophil |
| Fam111a        | 0.48 | 0.00 | 0.00 | 0.30 | 0.15 | 22 | Neutrophil |
| Gpi1           | 0.49 | 0.00 | 0.00 | 0.27 | 0.14 | 22 | Neutrophil |
| Tspo           | 0.43 | 0.00 | 0.00 | 0.42 | 0.26 | 22 | Neutrophil |
| Akap13         | 0.55 | 0.00 | 0.00 | 0.42 | 0.27 | 22 | Neutrophil |
| Mgst1          | 0.49 | 0.00 | 0.00 | 0.35 | 0.20 | 22 | Neutrophil |
| Shfm1          | 0.35 | 0.00 | 0.00 | 0.77 | 0.64 | 22 | Neutrophil |
| Arpc2          | 0.35 | 0.00 | 0.00 | 0.76 | 0.61 | 22 | Neutrophil |
| Actr2          | 0.42 | 0.00 | 0.00 | 0.43 | 0.28 | 22 | Neutrophil |
| Atp6v1g1       | 0.51 | 0.00 | 0.00 | 0.48 | 0.32 | 22 | Neutrophil |
| Fam32a         | 0.50 | 0.00 | 0.00 | 0.39 | 0.24 | 22 | Neutrophil |
| Cmip           | 0.47 | 0.00 | 0.00 | 0.34 | 0.20 | 22 | Neutrophil |
| Stk38          | 0.45 | 0.00 | 0.00 | 0.34 | 0.20 | 22 | Neutrophil |

|               |      |      |      |      |      |    |                   |
|---------------|------|------|------|------|------|----|-------------------|
| Lmo4          | 0.43 | 0.00 | 0.00 | 0.40 | 0.26 | 22 | Neutrophil        |
| Arid4a        | 0.58 | 0.00 | 0.00 | 0.43 | 0.29 | 22 | Neutrophil        |
| Atp6v0c       | 0.65 | 0.00 | 0.00 | 0.39 | 0.26 | 22 | Neutrophil        |
| Tsc22d4       | 0.50 | 0.00 | 0.00 | 0.41 | 0.28 | 22 | Neutrophil        |
| Irf2          | 0.50 | 0.00 | 0.00 | 0.38 | 0.24 | 22 | Neutrophil        |
| Ptpn1         | 0.50 | 0.00 | 0.00 | 0.33 | 0.20 | 22 | Neutrophil        |
| Mrpl33        | 0.47 | 0.00 | 0.00 | 0.43 | 0.30 | 22 | Neutrophil        |
| Jund          | 0.46 | 0.00 | 0.00 | 0.41 | 0.28 | 22 | Neutrophil        |
| Serp1         | 0.47 | 0.00 | 0.00 | 0.36 | 0.23 | 22 | Neutrophil        |
| Gm5506        | 0.39 | 0.00 | 0.00 | 0.26 | 0.14 | 22 | Neutrophil        |
| Actg1         | 0.26 | 0.00 | 0.00 | 0.86 | 0.76 | 22 | Neutrophil        |
| Iqgap1        | 0.39 | 0.00 | 0.00 | 0.58 | 0.45 | 22 | Neutrophil        |
| Ptbp3         | 0.38 | 0.00 | 0.00 | 0.49 | 0.36 | 22 | Neutrophil        |
| Ftl1          | 0.56 | 0.00 | 0.00 | 0.69 | 0.57 | 22 | Neutrophil        |
| Actn1         | 0.41 | 0.00 | 0.00 | 0.35 | 0.23 | 22 | Neutrophil        |
| Emd           | 0.39 | 0.00 | 0.00 | 0.53 | 0.40 | 22 | Neutrophil        |
| Grb2          | 0.42 | 0.00 | 0.00 | 0.29 | 0.18 | 22 | Neutrophil        |
| Gm10282       | 0.41 | 0.00 | 0.00 | 0.52 | 0.40 | 22 | Neutrophil        |
| Limd2         | 0.32 | 0.00 | 0.00 | 0.26 | 0.15 | 22 | Neutrophil        |
| Msl1          | 0.41 | 0.00 | 0.00 | 0.30 | 0.19 | 22 | Neutrophil        |
| Ckap4         | 0.32 | 0.00 | 0.00 | 0.29 | 0.18 | 22 | Neutrophil        |
| Map1lc3b      | 0.45 | 0.00 | 0.00 | 0.49 | 0.40 | 22 | Neutrophil        |
| Eno1          | 0.37 | 0.00 | 0.00 | 0.26 | 0.16 | 22 | Neutrophil        |
| Arpc3         | 0.34 | 0.00 | 0.00 | 0.37 | 0.26 | 22 | Neutrophil        |
| Atg3          | 0.48 | 0.00 | 0.00 | 0.28 | 0.19 | 22 | Neutrophil        |
| Myh9          | 0.29 | 0.00 | 0.00 | 0.46 | 0.33 | 22 | Neutrophil        |
| Actr3         | 0.30 | 0.00 | 0.00 | 0.45 | 0.33 | 22 | Neutrophil        |
| Ubc           | 0.37 | 0.00 | 0.00 | 0.58 | 0.49 | 22 | Neutrophil        |
| Gabarap       | 0.39 | 0.00 | 0.00 | 0.53 | 0.44 | 22 | Neutrophil        |
| Ypel3         | 0.42 | 0.00 | 0.00 | 0.30 | 0.21 | 22 | Neutrophil        |
| Ubb           | 0.27 | 0.00 | 0.00 | 0.86 | 0.81 | 22 | Neutrophil        |
| Aldoa         | 0.36 | 0.00 | 0.00 | 0.29 | 0.19 | 22 | Neutrophil        |
| Gm17087       | 0.44 | 0.00 | 0.01 | 0.34 | 0.24 | 22 | Neutrophil        |
| Arpc4         | 0.32 | 0.00 | 0.02 | 0.27 | 0.18 | 22 | Neutrophil        |
| Atp6v1e1      | 0.42 | 0.00 | 0.03 | 0.34 | 0.25 | 22 | Neutrophil        |
| Cd97          | 0.27 | 0.00 | 0.04 | 0.27 | 0.18 | 22 | Neutrophil        |
| Top2a         | 1.92 | 0.00 | 0.00 | 0.83 | 0.11 | 23 | Matrix Fibroblast |
| Prc1          | 1.79 | 0.00 | 0.00 | 0.71 | 0.06 | 23 | Matrix Fibroblast |
| Mki67         | 1.73 | 0.00 | 0.00 | 0.84 | 0.12 | 23 | Matrix Fibroblast |
| 2810417H13Rik | 1.64 | 0.00 | 0.00 | 0.70 | 0.08 | 23 | Matrix Fibroblast |
| Spc25         | 1.44 | 0.00 | 0.00 | 0.58 | 0.05 | 23 | Matrix Fibroblast |
| Tpx2          | 1.42 | 0.00 | 0.00 | 0.62 | 0.05 | 23 | Matrix Fibroblast |
| Hmmr          | 1.39 | 0.00 | 0.00 | 0.54 | 0.04 | 23 | Matrix Fibroblast |

|              |      |      |      |      |      |    |                   |
|--------------|------|------|------|------|------|----|-------------------|
| Ckap2        | 1.28 | 0.00 | 0.00 | 0.53 | 0.04 | 23 | Matrix Fibroblast |
| RP23-45G16.5 | 1.26 | 0.00 | 0.00 | 0.57 | 0.05 | 23 | Matrix Fibroblast |
| Birc5        | 1.23 | 0.00 | 0.00 | 0.62 | 0.06 | 23 | Matrix Fibroblast |
| Cdk1         | 1.22 | 0.00 | 0.00 | 0.57 | 0.05 | 23 | Matrix Fibroblast |
| Spc24        | 1.18 | 0.00 | 0.00 | 0.57 | 0.05 | 23 | Matrix Fibroblast |
| Ckap2l       | 1.14 | 0.00 | 0.00 | 0.53 | 0.04 | 23 | Matrix Fibroblast |
| Pbk          | 1.07 | 0.00 | 0.00 | 0.45 | 0.03 | 23 | Matrix Fibroblast |
| Tk1          | 1.06 | 0.00 | 0.00 | 0.45 | 0.03 | 23 | Matrix Fibroblast |
| Nuf2         | 1.06 | 0.00 | 0.00 | 0.44 | 0.03 | 23 | Matrix Fibroblast |
| Cenpk        | 0.99 | 0.00 | 0.00 | 0.47 | 0.03 | 23 | Matrix Fibroblast |
| Cdca3        | 1.08 | 0.00 | 0.00 | 0.46 | 0.03 | 23 | Matrix Fibroblast |
| Nusap1       | 1.36 | 0.00 | 0.00 | 0.57 | 0.06 | 23 | Matrix Fibroblast |
| Cenpm        | 0.72 | 0.00 | 0.00 | 0.36 | 0.02 | 23 | Matrix Fibroblast |
| Sgol2        | 1.20 | 0.00 | 0.00 | 0.47 | 0.04 | 23 | Matrix Fibroblast |
| Anln         | 1.00 | 0.00 | 0.00 | 0.43 | 0.03 | 23 | Matrix Fibroblast |
| Kif15        | 1.16 | 0.00 | 0.00 | 0.49 | 0.04 | 23 | Matrix Fibroblast |
| Kif20b       | 1.53 | 0.00 | 0.00 | 0.58 | 0.06 | 23 | Matrix Fibroblast |
| Neil3        | 0.88 | 0.00 | 0.00 | 0.36 | 0.02 | 23 | Matrix Fibroblast |
| Hist1h2an    | 1.83 | 0.00 | 0.00 | 0.67 | 0.09 | 23 | Matrix Fibroblast |
| Hist1h2ae    | 1.86 | 0.00 | 0.00 | 0.66 | 0.09 | 23 | Matrix Fibroblast |
| Cenpf        | 1.80 | 0.00 | 0.00 | 0.63 | 0.08 | 23 | Matrix Fibroblast |
| Hist1h2ak    | 1.72 | 0.00 | 0.00 | 0.61 | 0.07 | 23 | Matrix Fibroblast |
| Hist1h2ad    | 1.90 | 0.00 | 0.00 | 0.71 | 0.10 | 23 | Matrix Fibroblast |
| Cks2         | 1.34 | 0.00 | 0.00 | 0.63 | 0.08 | 23 | Matrix Fibroblast |
| Tacc3        | 1.13 | 0.00 | 0.00 | 0.53 | 0.05 | 23 | Matrix Fibroblast |
| Ncapg        | 1.02 | 0.00 | 0.00 | 0.48 | 0.04 | 23 | Matrix Fibroblast |
| Fam64a       | 0.85 | 0.00 | 0.00 | 0.32 | 0.02 | 23 | Matrix Fibroblast |
| Ccnb2        | 1.32 | 0.00 | 0.00 | 0.54 | 0.06 | 23 | Matrix Fibroblast |
| Ndc80        | 1.05 | 0.00 | 0.00 | 0.44 | 0.04 | 23 | Matrix Fibroblast |
| Diap3        | 1.19 | 0.00 | 0.00 | 0.54 | 0.06 | 23 | Matrix Fibroblast |
| Cenpe        | 1.52 | 0.00 | 0.00 | 0.61 | 0.08 | 23 | Matrix Fibroblast |
| Smc2         | 1.58 | 0.00 | 0.00 | 0.79 | 0.13 | 23 | Matrix Fibroblast |
| Ube2c        | 1.32 | 0.00 | 0.00 | 0.50 | 0.05 | 23 | Matrix Fibroblast |
| Kif11        | 0.94 | 0.00 | 0.00 | 0.44 | 0.04 | 23 | Matrix Fibroblast |
| Casc5        | 1.08 | 0.00 | 0.00 | 0.46 | 0.04 | 23 | Matrix Fibroblast |
| Racgap1      | 0.87 | 0.00 | 0.00 | 0.43 | 0.04 | 23 | Matrix Fibroblast |
| Esco2        | 0.96 | 0.00 | 0.00 | 0.40 | 0.03 | 23 | Matrix Fibroblast |
| Hist1h2ah    | 1.86 | 0.00 | 0.00 | 0.66 | 0.09 | 23 | Matrix Fibroblast |
| Hist1h2ag    | 1.98 | 0.00 | 0.00 | 0.72 | 0.12 | 23 | Matrix Fibroblast |
| Tubb6        | 1.20 | 0.00 | 0.00 | 0.59 | 0.07 | 23 | Matrix Fibroblast |
| Ska3         | 0.67 | 0.00 | 0.00 | 0.28 | 0.02 | 23 | Matrix Fibroblast |
| Hist1h2af    | 1.79 | 0.00 | 0.00 | 0.63 | 0.09 | 23 | Matrix Fibroblast |
| Hist1h2ai    | 1.91 | 0.00 | 0.00 | 0.66 | 0.10 | 23 | Matrix Fibroblast |

|               |      |      |      |      |      |    |                   |
|---------------|------|------|------|------|------|----|-------------------|
| Hist1h2ab     | 1.83 | 0.00 | 0.00 | 0.63 | 0.09 | 23 | Matrix Fibroblast |
| Cenpp         | 0.69 | 0.00 | 0.00 | 0.29 | 0.02 | 23 | Matrix Fibroblast |
| Hist1h2ac     | 1.92 | 0.00 | 0.00 | 0.67 | 0.10 | 23 | Matrix Fibroblast |
| H2afx         | 1.39 | 0.00 | 0.00 | 0.64 | 0.09 | 23 | Matrix Fibroblast |
| Ccna2         | 1.01 | 0.00 | 0.00 | 0.41 | 0.04 | 23 | Matrix Fibroblast |
| Melk          | 0.68 | 0.00 | 0.00 | 0.28 | 0.02 | 23 | Matrix Fibroblast |
| Cdca8         | 1.06 | 0.00 | 0.00 | 0.47 | 0.05 | 23 | Matrix Fibroblast |
| Kif20a        | 0.75 | 0.00 | 0.00 | 0.31 | 0.02 | 23 | Matrix Fibroblast |
| Cenpa         | 1.33 | 0.00 | 0.00 | 0.52 | 0.06 | 23 | Matrix Fibroblast |
| Mxd3          | 0.65 | 0.00 | 0.00 | 0.29 | 0.02 | 23 | Matrix Fibroblast |
| Aspm          | 0.93 | 0.00 | 0.00 | 0.36 | 0.03 | 23 | Matrix Fibroblast |
| Hist1h2ap     | 2.07 | 0.00 | 0.00 | 0.76 | 0.15 | 23 | Matrix Fibroblast |
| Mis18bp1      | 1.00 | 0.00 | 0.00 | 0.37 | 0.03 | 23 | Matrix Fibroblast |
| Sgol1         | 0.79 | 0.00 | 0.00 | 0.34 | 0.03 | 23 | Matrix Fibroblast |
| Kif23         | 1.15 | 0.00 | 0.00 | 0.47 | 0.05 | 23 | Matrix Fibroblast |
| Hist1h2ao     | 2.09 | 0.00 | 0.00 | 0.75 | 0.15 | 23 | Matrix Fibroblast |
| Knstrn        | 0.88 | 0.00 | 0.00 | 0.39 | 0.04 | 23 | Matrix Fibroblast |
| Bub1          | 0.64 | 0.00 | 0.00 | 0.31 | 0.03 | 23 | Matrix Fibroblast |
| Ska1          | 0.65 | 0.00 | 0.00 | 0.28 | 0.02 | 23 | Matrix Fibroblast |
| Dlgap5        | 0.70 | 0.00 | 0.00 | 0.31 | 0.03 | 23 | Matrix Fibroblast |
| Tyms          | 0.97 | 0.00 | 0.00 | 0.45 | 0.05 | 23 | Matrix Fibroblast |
| Incenp        | 1.20 | 0.00 | 0.00 | 0.55 | 0.08 | 23 | Matrix Fibroblast |
| Cdc20         | 1.08 | 0.00 | 0.00 | 0.42 | 0.05 | 23 | Matrix Fibroblast |
| Prrx1         | 0.77 | 0.00 | 0.00 | 0.33 | 0.03 | 23 | Matrix Fibroblast |
| Cenph         | 0.84 | 0.00 | 0.00 | 0.35 | 0.03 | 23 | Matrix Fibroblast |
| Ccnb1         | 0.72 | 0.00 | 0.00 | 0.29 | 0.02 | 23 | Matrix Fibroblast |
| Rad51ap1      | 0.71 | 0.00 | 0.00 | 0.34 | 0.03 | 23 | Matrix Fibroblast |
| Lmnbl         | 0.94 | 0.00 | 0.00 | 0.55 | 0.08 | 23 | Matrix Fibroblast |
| Ect2          | 0.67 | 0.00 | 0.00 | 0.28 | 0.02 | 23 | Matrix Fibroblast |
| Clspn         | 0.88 | 0.00 | 0.00 | 0.37 | 0.04 | 23 | Matrix Fibroblast |
| Kif22         | 0.66 | 0.00 | 0.00 | 0.28 | 0.02 | 23 | Matrix Fibroblast |
| Fbxo5         | 0.82 | 0.00 | 0.00 | 0.39 | 0.05 | 23 | Matrix Fibroblast |
| Rrm2          | 0.87 | 0.00 | 0.00 | 0.39 | 0.05 | 23 | Matrix Fibroblast |
| C330027C09Rik | 0.74 | 0.00 | 0.00 | 0.31 | 0.03 | 23 | Matrix Fibroblast |
| Cdca2         | 0.58 | 0.00 | 0.00 | 0.25 | 0.02 | 23 | Matrix Fibroblast |
| Aurkb         | 0.69 | 0.00 | 0.00 | 0.29 | 0.03 | 23 | Matrix Fibroblast |
| Hist1h1b      | 1.00 | 0.00 | 0.00 | 0.34 | 0.04 | 23 | Matrix Fibroblast |
| Arhgap11a     | 0.84 | 0.00 | 0.00 | 0.37 | 0.04 | 23 | Matrix Fibroblast |
| Spdl1         | 0.58 | 0.00 | 0.00 | 0.26 | 0.02 | 23 | Matrix Fibroblast |
| Gm10282       | 1.40 | 0.00 | 0.00 | 0.95 | 0.40 | 23 | Matrix Fibroblast |
| Gpc3          | 1.23 | 0.00 | 0.00 | 0.73 | 0.16 | 23 | Matrix Fibroblast |
| Rrm1          | 0.79 | 0.00 | 0.00 | 0.45 | 0.06 | 23 | Matrix Fibroblast |
| Hmgb2         | 1.48 | 0.00 | 0.00 | 0.97 | 0.42 | 23 | Matrix Fibroblast |

|             |      |      |      |      |      |    |                   |
|-------------|------|------|------|------|------|----|-------------------|
| Cep55       | 0.59 | 0.00 | 0.00 | 0.29 | 0.03 | 23 | Matrix Fibroblast |
| Hmgn2       | 1.39 | 0.00 | 0.00 | 0.96 | 0.43 | 23 | Matrix Fibroblast |
| Stmn1       | 1.16 | 0.00 | 0.00 | 0.83 | 0.23 | 23 | Matrix Fibroblast |
| Plk4        | 0.72 | 0.00 | 0.00 | 0.35 | 0.04 | 23 | Matrix Fibroblast |
| Kif4        | 0.62 | 0.00 | 0.00 | 0.26 | 0.03 | 23 | Matrix Fibroblast |
| H2afz       | 1.32 | 0.00 | 0.00 | 0.94 | 0.40 | 23 | Matrix Fibroblast |
| Ncapd2      | 0.65 | 0.00 | 0.00 | 0.35 | 0.04 | 23 | Matrix Fibroblast |
| Tpm2        | 1.05 | 0.00 | 0.00 | 0.64 | 0.13 | 23 | Matrix Fibroblast |
| D17H6S56E-5 | 0.92 | 0.00 | 0.00 | 0.56 | 0.10 | 23 | Matrix Fibroblast |
| Cenpw       | 0.70 | 0.00 | 0.00 | 0.37 | 0.05 | 23 | Matrix Fibroblast |
| Ccdc34      | 1.07 | 0.00 | 0.00 | 0.63 | 0.14 | 23 | Matrix Fibroblast |
| Cks1b       | 0.91 | 0.00 | 0.00 | 0.52 | 0.09 | 23 | Matrix Fibroblast |
| Ncapg2      | 0.59 | 0.00 | 0.00 | 0.28 | 0.03 | 23 | Matrix Fibroblast |
| Hjurp       | 1.06 | 0.00 | 0.00 | 0.64 | 0.14 | 23 | Matrix Fibroblast |
| Tuba1b      | 1.24 | 0.00 | 0.00 | 0.96 | 0.45 | 23 | Matrix Fibroblast |
| Lgals1      | 1.25 | 0.00 | 0.00 | 0.97 | 0.41 | 23 | Matrix Fibroblast |
| Cenpq       | 0.72 | 0.00 | 0.00 | 0.43 | 0.07 | 23 | Matrix Fibroblast |
| Slfn9       | 0.82 | 0.00 | 0.00 | 0.31 | 0.04 | 23 | Matrix Fibroblast |
| Mdk         | 0.99 | 0.00 | 0.00 | 0.74 | 0.18 | 23 | Matrix Fibroblast |
| Tcf19       | 0.59 | 0.00 | 0.00 | 0.28 | 0.03 | 23 | Matrix Fibroblast |
| Col1a2      | 1.18 | 0.00 | 0.00 | 0.98 | 0.39 | 23 | Matrix Fibroblast |
| Atad2       | 0.90 | 0.00 | 0.00 | 0.45 | 0.08 | 23 | Matrix Fibroblast |
| Mns1        | 0.72 | 0.00 | 0.00 | 0.32 | 0.04 | 23 | Matrix Fibroblast |
| Slc27a6     | 0.68 | 0.00 | 0.00 | 0.32 | 0.04 | 23 | Matrix Fibroblast |
| Ska2        | 0.66 | 0.00 | 0.00 | 0.41 | 0.07 | 23 | Matrix Fibroblast |
| Itga8       | 0.85 | 0.00 | 0.00 | 0.49 | 0.09 | 23 | Matrix Fibroblast |
| Cdh11       | 1.00 | 0.00 | 0.00 | 0.72 | 0.19 | 23 | Matrix Fibroblast |
| Smc4        | 1.21 | 0.00 | 0.00 | 0.88 | 0.34 | 23 | Matrix Fibroblast |
| Col1a1      | 1.20 | 0.00 | 0.00 | 0.83 | 0.26 | 23 | Matrix Fibroblast |
| Prim1       | 0.70 | 0.00 | 0.00 | 0.35 | 0.05 | 23 | Matrix Fibroblast |
| Rangap1     | 0.77 | 0.00 | 0.00 | 0.43 | 0.08 | 23 | Matrix Fibroblast |
| Plac9a      | 0.92 | 0.00 | 0.00 | 0.91 | 0.30 | 23 | Matrix Fibroblast |
| Hirip3      | 0.88 | 0.00 | 0.00 | 0.46 | 0.09 | 23 | Matrix Fibroblast |
| Plac9b      | 0.89 | 0.00 | 0.00 | 0.91 | 0.30 | 23 | Matrix Fibroblast |
| Ccne2       | 0.78 | 0.00 | 0.00 | 0.28 | 0.03 | 23 | Matrix Fibroblast |
| Nexn        | 1.00 | 0.00 | 0.00 | 0.75 | 0.21 | 23 | Matrix Fibroblast |
| Fbln1       | 0.65 | 0.00 | 0.00 | 0.35 | 0.05 | 23 | Matrix Fibroblast |
| Col3a1      | 0.93 | 0.00 | 0.00 | 0.93 | 0.33 | 23 | Matrix Fibroblast |
| Lig1        | 0.99 | 0.00 | 0.00 | 0.46 | 0.09 | 23 | Matrix Fibroblast |
| Cdkn2c      | 0.63 | 0.00 | 0.00 | 0.31 | 0.04 | 23 | Matrix Fibroblast |
| Pola1       | 0.60 | 0.00 | 0.00 | 0.31 | 0.04 | 23 | Matrix Fibroblast |
| Colec12     | 0.83 | 0.00 | 0.00 | 0.49 | 0.10 | 23 | Matrix Fibroblast |
| Myh10       | 0.94 | 0.00 | 0.00 | 0.76 | 0.22 | 23 | Matrix Fibroblast |

|               |      |      |      |      |      |    |                   |
|---------------|------|------|------|------|------|----|-------------------|
| Nucks1        | 1.08 | 0.00 | 0.00 | 0.80 | 0.28 | 23 | Matrix Fibroblast |
| Dpt           | 1.00 | 0.00 | 0.00 | 0.65 | 0.17 | 23 | Matrix Fibroblast |
| Fn1           | 0.81 | 0.00 | 0.00 | 0.79 | 0.23 | 23 | Matrix Fibroblast |
| Loxl1         | 0.72 | 0.00 | 0.00 | 0.51 | 0.11 | 23 | Matrix Fibroblast |
| 4930579G24Rik | 0.45 | 0.00 | 0.00 | 0.26 | 0.03 | 23 | Matrix Fibroblast |
| H2afv         | 0.99 | 0.00 | 0.00 | 0.79 | 0.28 | 23 | Matrix Fibroblast |
| Hist2h2ab     | 0.61 | 0.00 | 0.00 | 0.29 | 0.04 | 23 | Matrix Fibroblast |
| 2700094K13Rik | 0.81 | 0.00 | 0.00 | 0.61 | 0.16 | 23 | Matrix Fibroblast |
| Bgn           | 0.84 | 0.00 | 0.00 | 0.77 | 0.24 | 23 | Matrix Fibroblast |
| Gm10259       | 0.70 | 0.00 | 0.00 | 0.35 | 0.06 | 23 | Matrix Fibroblast |
| Pcolce        | 0.71 | 0.00 | 0.00 | 0.43 | 0.09 | 23 | Matrix Fibroblast |
| Dhfr          | 0.57 | 0.00 | 0.00 | 0.29 | 0.04 | 23 | Matrix Fibroblast |
| Gmnn          | 0.63 | 0.00 | 0.00 | 0.38 | 0.07 | 23 | Matrix Fibroblast |
| Tmpo          | 0.81 | 0.00 | 0.00 | 0.57 | 0.15 | 23 | Matrix Fibroblast |
| Hist2h2ac     | 0.79 | 0.00 | 0.00 | 0.35 | 0.06 | 23 | Matrix Fibroblast |
| Figf          | 0.71 | 0.00 | 0.00 | 0.37 | 0.07 | 23 | Matrix Fibroblast |
| Mfap4         | 0.91 | 0.00 | 0.00 | 0.75 | 0.24 | 23 | Matrix Fibroblast |
| Tuba1c        | 0.99 | 0.00 | 0.00 | 0.81 | 0.32 | 23 | Matrix Fibroblast |
| Adamts2       | 0.66 | 0.00 | 0.00 | 0.47 | 0.10 | 23 | Matrix Fibroblast |
| Dut           | 0.66 | 0.00 | 0.00 | 0.42 | 0.09 | 23 | Matrix Fibroblast |
| Ncapd3        | 0.55 | 0.00 | 0.00 | 0.32 | 0.06 | 23 | Matrix Fibroblast |
| Tubb5         | 0.98 | 0.00 | 0.00 | 0.86 | 0.44 | 23 | Matrix Fibroblast |
| Meox2         | 0.61 | 0.00 | 0.00 | 0.39 | 0.08 | 23 | Matrix Fibroblast |
| Ran           | 0.92 | 0.00 | 0.00 | 0.84 | 0.38 | 23 | Matrix Fibroblast |
| Tcf21         | 0.63 | 0.00 | 0.00 | 0.63 | 0.17 | 23 | Matrix Fibroblast |
| Plxdc2        | 0.62 | 0.00 | 0.00 | 0.51 | 0.12 | 23 | Matrix Fibroblast |
| Lbh           | 0.80 | 0.00 | 0.00 | 0.64 | 0.19 | 23 | Matrix Fibroblast |
| Dnajc9        | 0.67 | 0.00 | 0.00 | 0.49 | 0.12 | 23 | Matrix Fibroblast |
| Adh1          | 0.93 | 0.00 | 0.00 | 0.59 | 0.17 | 23 | Matrix Fibroblast |
| Usp1          | 0.75 | 0.00 | 0.00 | 0.56 | 0.15 | 23 | Matrix Fibroblast |
| Ezh2          | 0.79 | 0.00 | 0.00 | 0.62 | 0.19 | 23 | Matrix Fibroblast |
| Dek           | 0.90 | 0.00 | 0.00 | 0.91 | 0.50 | 23 | Matrix Fibroblast |
| Ckap5         | 0.76 | 0.00 | 0.00 | 0.46 | 0.11 | 23 | Matrix Fibroblast |
| Mgp           | 0.98 | 0.00 | 0.00 | 0.82 | 0.31 | 23 | Matrix Fibroblast |
| Ncaph         | 0.47 | 0.00 | 0.00 | 0.28 | 0.05 | 23 | Matrix Fibroblast |
| Fbn1          | 0.67 | 0.00 | 0.00 | 0.61 | 0.17 | 23 | Matrix Fibroblast |
| Hmgb1         | 0.85 | 0.00 | 0.00 | 0.94 | 0.61 | 23 | Matrix Fibroblast |
| Myl9          | 0.83 | 0.00 | 0.00 | 0.48 | 0.12 | 23 | Matrix Fibroblast |
| Cenpc1        | 0.70 | 0.00 | 0.00 | 0.39 | 0.09 | 23 | Matrix Fibroblast |
| Gm10184       | 0.71 | 0.00 | 0.00 | 0.34 | 0.07 | 23 | Matrix Fibroblast |
| Prdx4         | 0.75 | 0.00 | 0.00 | 0.56 | 0.16 | 23 | Matrix Fibroblast |
| Acta2         | 1.02 | 0.00 | 0.00 | 0.63 | 0.19 | 23 | Matrix Fibroblast |
| Whsc1         | 0.71 | 0.00 | 0.00 | 0.50 | 0.14 | 23 | Matrix Fibroblast |

|               |      |      |      |      |      |    |                   |
|---------------|------|------|------|------|------|----|-------------------|
| Cmc2          | 0.48 | 0.00 | 0.00 | 0.29 | 0.05 | 23 | Matrix Fibroblast |
| Trim59        | 0.59 | 0.00 | 0.00 | 0.26 | 0.04 | 23 | Matrix Fibroblast |
| Lox           | 0.55 | 0.00 | 0.00 | 0.52 | 0.13 | 23 | Matrix Fibroblast |
| Cped1         | 0.62 | 0.00 | 0.00 | 0.42 | 0.10 | 23 | Matrix Fibroblast |
| Ugdh          | 0.61 | 0.00 | 0.00 | 0.39 | 0.09 | 23 | Matrix Fibroblast |
| Ccdc80        | 0.70 | 0.00 | 0.00 | 0.45 | 0.11 | 23 | Matrix Fibroblast |
| Gpx7          | 0.63 | 0.00 | 0.00 | 0.41 | 0.10 | 23 | Matrix Fibroblast |
| Kpna2         | 0.68 | 0.00 | 0.00 | 0.31 | 0.06 | 23 | Matrix Fibroblast |
| Rbp1          | 0.64 | 0.00 | 0.00 | 0.63 | 0.19 | 23 | Matrix Fibroblast |
| Nkain4        | 0.52 | 0.00 | 0.00 | 0.26 | 0.05 | 23 | Matrix Fibroblast |
| 6030408B16Rik | 0.51 | 0.00 | 0.00 | 0.27 | 0.05 | 23 | Matrix Fibroblast |
| G2e3          | 0.57 | 0.00 | 0.00 | 0.32 | 0.06 | 23 | Matrix Fibroblast |
| Mfap5         | 0.81 | 0.00 | 0.00 | 0.32 | 0.06 | 23 | Matrix Fibroblast |
| Ckap4         | 0.75 | 0.00 | 0.00 | 0.57 | 0.18 | 23 | Matrix Fibroblast |
| Vcan          | 0.68 | 0.00 | 0.00 | 0.44 | 0.11 | 23 | Matrix Fibroblast |
| Fhl1          | 0.67 | 0.00 | 0.00 | 0.78 | 0.29 | 23 | Matrix Fibroblast |
| Hist1h1d      | 0.85 | 0.00 | 0.00 | 0.41 | 0.10 | 23 | Matrix Fibroblast |
| Dtymk         | 0.59 | 0.00 | 0.00 | 0.49 | 0.13 | 23 | Matrix Fibroblast |
| Serpine2      | 0.51 | 0.00 | 0.00 | 0.74 | 0.25 | 23 | Matrix Fibroblast |
| Mmp2          | 0.63 | 0.00 | 0.00 | 0.49 | 0.13 | 23 | Matrix Fibroblast |
| Slc38a5       | 0.54 | 0.00 | 0.00 | 0.30 | 0.06 | 23 | Matrix Fibroblast |
| Rarres2       | 0.56 | 0.00 | 0.00 | 0.49 | 0.13 | 23 | Matrix Fibroblast |
| Fstl1         | 0.69 | 0.00 | 0.00 | 0.91 | 0.44 | 23 | Matrix Fibroblast |
| Cntln         | 0.72 | 0.00 | 0.00 | 0.44 | 0.12 | 23 | Matrix Fibroblast |
| 4632419I22Rik | 0.51 | 0.00 | 0.00 | 0.35 | 0.08 | 23 | Matrix Fibroblast |
| Rnd3          | 0.47 | 0.00 | 0.00 | 0.35 | 0.07 | 23 | Matrix Fibroblast |
| Dbf4          | 0.56 | 0.00 | 0.00 | 0.28 | 0.05 | 23 | Matrix Fibroblast |
| Tubb4b        | 0.79 | 0.00 | 0.00 | 0.57 | 0.19 | 23 | Matrix Fibroblast |
| Enpep         | 0.59 | 0.00 | 0.00 | 0.41 | 0.10 | 23 | Matrix Fibroblast |
| Pcolce2       | 0.59 | 0.00 | 0.00 | 0.39 | 0.09 | 23 | Matrix Fibroblast |
| Spon1         | 0.54 | 0.00 | 0.00 | 0.33 | 0.07 | 23 | Matrix Fibroblast |
| Psip1         | 0.74 | 0.00 | 0.00 | 0.50 | 0.15 | 23 | Matrix Fibroblast |
| Gucy1b3       | 0.55 | 0.00 | 0.00 | 0.29 | 0.06 | 23 | Matrix Fibroblast |
| Cbx5          | 0.72 | 0.00 | 0.00 | 0.69 | 0.26 | 23 | Matrix Fibroblast |
| Fxyd1         | 0.49 | 0.00 | 0.00 | 0.38 | 0.09 | 23 | Matrix Fibroblast |
| Atad5         | 0.54 | 0.00 | 0.00 | 0.28 | 0.05 | 23 | Matrix Fibroblast |
| Serping1      | 0.51 | 0.00 | 0.00 | 0.46 | 0.12 | 23 | Matrix Fibroblast |
| Nasp          | 0.69 | 0.00 | 0.00 | 0.59 | 0.20 | 23 | Matrix Fibroblast |
| Ptprd         | 0.58 | 0.00 | 0.00 | 0.43 | 0.11 | 23 | Matrix Fibroblast |
| Tuba1a        | 0.75 | 0.00 | 0.00 | 0.90 | 0.51 | 23 | Matrix Fibroblast |
| Fblim1        | 0.56 | 0.00 | 0.00 | 0.54 | 0.16 | 23 | Matrix Fibroblast |
| Ednra         | 0.56 | 0.00 | 0.00 | 0.37 | 0.09 | 23 | Matrix Fibroblast |
| Iigp1         | 0.77 | 0.00 | 0.00 | 0.47 | 0.13 | 23 | Matrix Fibroblast |

|               |      |      |      |      |      |    |                   |
|---------------|------|------|------|------|------|----|-------------------|
| Col6a2        | 0.53 | 0.00 | 0.00 | 0.50 | 0.15 | 23 | Matrix Fibroblast |
| Nr2f2         | 0.62 | 0.00 | 0.00 | 0.61 | 0.21 | 23 | Matrix Fibroblast |
| Olfml3        | 0.56 | 0.00 | 0.00 | 0.36 | 0.08 | 23 | Matrix Fibroblast |
| 10-Sep        | 0.55 | 0.00 | 0.00 | 0.37 | 0.09 | 23 | Matrix Fibroblast |
| Rad21         | 0.85 | 0.00 | 0.00 | 0.62 | 0.23 | 23 | Matrix Fibroblast |
| Nnat          | 0.75 | 0.00 | 0.00 | 0.33 | 0.08 | 23 | Matrix Fibroblast |
| Gucy1a3       | 0.71 | 0.00 | 0.00 | 0.39 | 0.10 | 23 | Matrix Fibroblast |
| Cdk5rap2      | 0.57 | 0.00 | 0.00 | 0.37 | 0.09 | 23 | Matrix Fibroblast |
| Fbln5         | 0.58 | 0.00 | 0.00 | 0.54 | 0.17 | 23 | Matrix Fibroblast |
| Bicc1         | 0.55 | 0.00 | 0.00 | 0.31 | 0.07 | 23 | Matrix Fibroblast |
| Col13a1       | 0.53 | 0.00 | 0.00 | 0.38 | 0.10 | 23 | Matrix Fibroblast |
| Hist1h1e      | 1.01 | 0.00 | 0.00 | 0.50 | 0.16 | 23 | Matrix Fibroblast |
| Ppp1r14a      | 0.37 | 0.00 | 0.00 | 0.35 | 0.08 | 23 | Matrix Fibroblast |
| Hmgcn1        | 0.72 | 0.00 | 0.00 | 0.85 | 0.45 | 23 | Matrix Fibroblast |
| Col6a3        | 0.51 | 0.00 | 0.00 | 0.38 | 0.10 | 23 | Matrix Fibroblast |
| Pcna-ps2      | 0.87 | 0.00 | 0.00 | 0.51 | 0.18 | 23 | Matrix Fibroblast |
| Ptma          | 0.51 | 0.00 | 0.00 | 1.00 | 0.91 | 23 | Matrix Fibroblast |
| Pcna          | 0.85 | 0.00 | 0.00 | 0.51 | 0.18 | 23 | Matrix Fibroblast |
| Anp32b        | 0.67 | 0.00 | 0.00 | 0.88 | 0.50 | 23 | Matrix Fibroblast |
| Akap12        | 0.70 | 0.00 | 0.00 | 0.63 | 0.24 | 23 | Matrix Fibroblast |
| Rfc3          | 0.50 | 0.00 | 0.00 | 0.35 | 0.09 | 23 | Matrix Fibroblast |
| Fam111a       | 0.52 | 0.00 | 0.00 | 0.49 | 0.15 | 23 | Matrix Fibroblast |
| 5830418K08Rik | 0.46 | 0.00 | 0.00 | 0.35 | 0.09 | 23 | Matrix Fibroblast |
| Anp32e        | 0.69 | 0.00 | 0.00 | 0.69 | 0.28 | 23 | Matrix Fibroblast |
| Cox6b2        | 0.42 | 0.00 | 0.00 | 0.25 | 0.05 | 23 | Matrix Fibroblast |
| Sema5a        | 0.41 | 0.00 | 0.00 | 0.26 | 0.06 | 23 | Matrix Fibroblast |
| Oxct1         | 0.56 | 0.00 | 0.00 | 0.47 | 0.15 | 23 | Matrix Fibroblast |
| Postn         | 0.99 | 0.00 | 0.00 | 0.32 | 0.08 | 23 | Matrix Fibroblast |
| Dnmt1         | 0.53 | 0.00 | 0.00 | 0.38 | 0.10 | 23 | Matrix Fibroblast |
| Idh2          | 0.54 | 0.00 | 0.00 | 0.55 | 0.19 | 23 | Matrix Fibroblast |
| Gm10068       | 0.65 | 0.00 | 0.00 | 0.69 | 0.30 | 23 | Matrix Fibroblast |
| Mcm4          | 0.40 | 0.00 | 0.00 | 0.26 | 0.06 | 23 | Matrix Fibroblast |
| Hells         | 0.50 | 0.00 | 0.00 | 0.26 | 0.06 | 23 | Matrix Fibroblast |
| Sparc         | 0.59 | 0.00 | 0.00 | 0.99 | 0.73 | 23 | Matrix Fibroblast |
| Rap2a         | 0.62 | 0.00 | 0.00 | 0.48 | 0.16 | 23 | Matrix Fibroblast |
| Gm10123       | 0.56 | 0.00 | 0.00 | 0.95 | 0.81 | 23 | Matrix Fibroblast |
| Prkcdp        | 0.52 | 0.00 | 0.00 | 0.39 | 0.11 | 23 | Matrix Fibroblast |
| Hsp90aa1      | 0.58 | 0.00 | 0.00 | 0.85 | 0.47 | 23 | Matrix Fibroblast |
| Col16a1       | 0.39 | 0.00 | 0.00 | 0.26 | 0.06 | 23 | Matrix Fibroblast |
| Cp            | 0.49 | 0.00 | 0.00 | 0.42 | 0.12 | 23 | Matrix Fibroblast |
| Rcn3          | 0.47 | 0.00 | 0.00 | 0.43 | 0.13 | 23 | Matrix Fibroblast |
| Banf1         | 0.63 | 0.00 | 0.00 | 0.67 | 0.28 | 23 | Matrix Fibroblast |
| Nde1          | 0.47 | 0.00 | 0.00 | 0.28 | 0.06 | 23 | Matrix Fibroblast |

|               |      |      |      |      |      |    |                   |
|---------------|------|------|------|------|------|----|-------------------|
| Slit2         | 0.55 | 0.00 | 0.00 | 0.31 | 0.08 | 23 | Matrix Fibroblast |
| Hist2h2aa2    | 0.79 | 0.00 | 0.00 | 0.42 | 0.14 | 23 | Matrix Fibroblast |
| Ranbp1        | 0.65 | 0.00 | 0.00 | 0.67 | 0.29 | 23 | Matrix Fibroblast |
| Snai2         | 0.50 | 0.00 | 0.00 | 0.41 | 0.12 | 23 | Matrix Fibroblast |
| Nop56         | 0.60 | 0.00 | 0.00 | 0.54 | 0.20 | 23 | Matrix Fibroblast |
| Cbx3          | 0.64 | 0.00 | 0.00 | 0.73 | 0.34 | 23 | Matrix Fibroblast |
| Gyg           | 0.62 | 0.00 | 0.00 | 0.53 | 0.19 | 23 | Matrix Fibroblast |
| Mcm7          | 0.35 | 0.00 | 0.00 | 0.30 | 0.07 | 23 | Matrix Fibroblast |
| Limch1        | 0.57 | 0.00 | 0.00 | 0.70 | 0.30 | 23 | Matrix Fibroblast |
| Sae1          | 0.45 | 0.00 | 0.00 | 0.38 | 0.11 | 23 | Matrix Fibroblast |
| Lmna          | 0.57 | 0.00 | 0.00 | 0.54 | 0.20 | 23 | Matrix Fibroblast |
| Gsn           | 0.44 | 0.00 | 0.00 | 0.64 | 0.25 | 23 | Matrix Fibroblast |
| Itm2a         | 0.38 | 0.00 | 0.00 | 0.28 | 0.07 | 23 | Matrix Fibroblast |
| Snrpd1        | 0.56 | 0.00 | 0.00 | 0.55 | 0.20 | 23 | Matrix Fibroblast |
| Tsen15        | 0.38 | 0.00 | 0.00 | 0.27 | 0.06 | 23 | Matrix Fibroblast |
| Cald1         | 0.60 | 0.00 | 0.00 | 0.85 | 0.41 | 23 | Matrix Fibroblast |
| Smc6          | 0.61 | 0.00 | 0.00 | 0.72 | 0.33 | 23 | Matrix Fibroblast |
| Lsm5          | 0.41 | 0.00 | 0.00 | 0.39 | 0.12 | 23 | Matrix Fibroblast |
| Igfbp7        | 0.57 | 0.00 | 0.00 | 0.80 | 0.39 | 23 | Matrix Fibroblast |
| Sh3bgrl       | 0.59 | 0.00 | 0.00 | 0.84 | 0.44 | 23 | Matrix Fibroblast |
| Col5a2        | 0.46 | 0.00 | 0.00 | 0.51 | 0.18 | 23 | Matrix Fibroblast |
| Gjc1          | 0.44 | 0.00 | 0.00 | 0.30 | 0.08 | 23 | Matrix Fibroblast |
| Fkbp9         | 0.43 | 0.00 | 0.00 | 0.44 | 0.14 | 23 | Matrix Fibroblast |
| Hist1h1c      | 0.59 | 0.00 | 0.00 | 0.37 | 0.11 | 23 | Matrix Fibroblast |
| 1700025G04Rik | 0.43 | 0.00 | 0.00 | 0.35 | 0.10 | 23 | Matrix Fibroblast |
| Slbp          | 0.51 | 0.00 | 0.00 | 0.44 | 0.15 | 23 | Matrix Fibroblast |
| Ltbp4         | 0.41 | 0.00 | 0.00 | 0.37 | 0.11 | 23 | Matrix Fibroblast |
| Etaa1         | 0.39 | 0.00 | 0.00 | 0.26 | 0.06 | 23 | Matrix Fibroblast |
| Ilf3          | 0.51 | 0.00 | 0.00 | 0.39 | 0.12 | 23 | Matrix Fibroblast |
| Cryab         | 0.36 | 0.00 | 0.00 | 0.44 | 0.14 | 23 | Matrix Fibroblast |
| Gpm6b         | 0.49 | 0.00 | 0.00 | 0.37 | 0.11 | 23 | Matrix Fibroblast |
| Lsm6          | 0.45 | 0.00 | 0.00 | 0.42 | 0.13 | 23 | Matrix Fibroblast |
| Hmgn5         | 0.61 | 0.00 | 0.00 | 0.63 | 0.26 | 23 | Matrix Fibroblast |
| Rab34         | 0.35 | 0.00 | 0.00 | 0.31 | 0.08 | 23 | Matrix Fibroblast |
| Ssrp1         | 0.55 | 0.00 | 0.00 | 0.55 | 0.21 | 23 | Matrix Fibroblast |
| Sept7         | 0.60 | 0.00 | 0.00 | 0.91 | 0.58 | 23 | Matrix Fibroblast |
| Tssc4         | 0.41 | 0.00 | 0.00 | 0.32 | 0.09 | 23 | Matrix Fibroblast |
| Nfia          | 0.55 | 0.00 | 0.00 | 0.59 | 0.24 | 23 | Matrix Fibroblast |
| Pls3          | 0.50 | 0.00 | 0.00 | 0.54 | 0.20 | 23 | Matrix Fibroblast |
| Ptms          | 0.68 | 0.00 | 0.00 | 0.77 | 0.40 | 23 | Matrix Fibroblast |
| Palld         | 0.36 | 0.00 | 0.00 | 0.51 | 0.17 | 23 | Matrix Fibroblast |
| 2700029M09Rik | 0.46 | 0.00 | 0.00 | 0.40 | 0.13 | 23 | Matrix Fibroblast |
| Adarb1        | 0.41 | 0.00 | 0.00 | 0.29 | 0.08 | 23 | Matrix Fibroblast |

|               |      |      |      |      |      |    |                   |
|---------------|------|------|------|------|------|----|-------------------|
| Hhip          | 0.40 | 0.00 | 0.00 | 0.28 | 0.07 | 23 | Matrix Fibroblast |
| Maf           | 0.44 | 0.00 | 0.00 | 0.53 | 0.19 | 23 | Matrix Fibroblast |
| Tubb4b-ps1    | 0.50 | 0.00 | 0.00 | 0.31 | 0.09 | 23 | Matrix Fibroblast |
| 0610007N19Rik | 0.39 | 0.00 | 0.00 | 0.44 | 0.15 | 23 | Matrix Fibroblast |
| Cdkn2d        | 0.45 | 0.00 | 0.00 | 0.27 | 0.07 | 23 | Matrix Fibroblast |
| Ppia          | 0.53 | 0.00 | 0.00 | 0.93 | 0.80 | 23 | Matrix Fibroblast |
| Crtap         | 0.32 | 0.00 | 0.00 | 0.29 | 0.07 | 23 | Matrix Fibroblast |
| Emilin1       | 0.36 | 0.00 | 0.00 | 0.33 | 0.09 | 23 | Matrix Fibroblast |
| Ism1          | 0.39 | 0.00 | 0.00 | 0.32 | 0.09 | 23 | Matrix Fibroblast |
| Mrpl51        | 0.47 | 0.00 | 0.00 | 0.45 | 0.16 | 23 | Matrix Fibroblast |
| Twsg1         | 0.43 | 0.00 | 0.00 | 0.38 | 0.12 | 23 | Matrix Fibroblast |
| Snhg5         | 0.45 | 0.00 | 0.00 | 0.49 | 0.18 | 23 | Matrix Fibroblast |
| Rbbp7         | 0.49 | 0.00 | 0.00 | 0.62 | 0.26 | 23 | Matrix Fibroblast |
| Npnt          | 0.64 | 0.00 | 0.00 | 0.58 | 0.24 | 23 | Matrix Fibroblast |
| Hivep3        | 0.44 | 0.00 | 0.00 | 0.28 | 0.07 | 23 | Matrix Fibroblast |
| Myof          | 0.40 | 0.00 | 0.00 | 0.33 | 0.10 | 23 | Matrix Fibroblast |
| Gm4204        | 0.51 | 0.00 | 0.00 | 0.85 | 0.50 | 23 | Matrix Fibroblast |
| Smc1a         | 0.52 | 0.00 | 0.00 | 0.73 | 0.35 | 23 | Matrix Fibroblast |
| Baz1b         | 0.49 | 0.00 | 0.00 | 0.63 | 0.26 | 23 | Matrix Fibroblast |
| Csrp1         | 0.39 | 0.00 | 0.00 | 0.47 | 0.17 | 23 | Matrix Fibroblast |
| Sparcl1       | 0.39 | 0.00 | 0.00 | 0.81 | 0.39 | 23 | Matrix Fibroblast |
| Egflam        | 0.41 | 0.00 | 0.00 | 0.29 | 0.08 | 23 | Matrix Fibroblast |
| Emp3          | 0.42 | 0.00 | 0.00 | 0.55 | 0.21 | 23 | Matrix Fibroblast |
| Bmpr1a        | 0.41 | 0.00 | 0.00 | 0.32 | 0.09 | 23 | Matrix Fibroblast |
| Kdelc2        | 0.38 | 0.00 | 0.00 | 0.35 | 0.11 | 23 | Matrix Fibroblast |
| Tspan3        | 0.39 | 0.00 | 0.00 | 0.45 | 0.16 | 23 | Matrix Fibroblast |
| Igf1          | 0.31 | 0.00 | 0.00 | 0.42 | 0.14 | 23 | Matrix Fibroblast |
| Nap1l1        | 0.48 | 0.00 | 0.00 | 0.82 | 0.47 | 23 | Matrix Fibroblast |
| Isoc1         | 0.37 | 0.00 | 0.00 | 0.28 | 0.08 | 23 | Matrix Fibroblast |
| Angpt1        | 0.36 | 0.00 | 0.00 | 0.28 | 0.08 | 23 | Matrix Fibroblast |
| Gpx8          | 0.40 | 0.00 | 0.00 | 0.42 | 0.14 | 23 | Matrix Fibroblast |
| Aebp1         | 0.45 | 0.00 | 0.00 | 0.28 | 0.08 | 23 | Matrix Fibroblast |
| Mesdc2        | 0.43 | 0.00 | 0.00 | 0.50 | 0.19 | 23 | Matrix Fibroblast |
| Nfib          | 0.51 | 0.00 | 0.00 | 0.84 | 0.47 | 23 | Matrix Fibroblast |
| Ptprrs        | 0.32 | 0.00 | 0.00 | 0.29 | 0.08 | 23 | Matrix Fibroblast |
| C1qtnf7       | 0.32 | 0.00 | 0.00 | 0.32 | 0.09 | 23 | Matrix Fibroblast |
| Lsm3          | 0.43 | 0.00 | 0.00 | 0.34 | 0.11 | 23 | Matrix Fibroblast |
| Nid1          | 0.44 | 0.00 | 0.00 | 0.57 | 0.23 | 23 | Matrix Fibroblast |
| Lyar          | 0.40 | 0.00 | 0.00 | 0.43 | 0.15 | 23 | Matrix Fibroblast |
| Dkk3          | 0.36 | 0.00 | 0.00 | 0.37 | 0.12 | 23 | Matrix Fibroblast |
| Atp1a2        | 0.33 | 0.00 | 0.00 | 0.33 | 0.10 | 23 | Matrix Fibroblast |
| Gm5160        | 0.40 | 0.00 | 0.00 | 0.54 | 0.22 | 23 | Matrix Fibroblast |
| Lamb1         | 0.42 | 0.00 | 0.00 | 0.44 | 0.16 | 23 | Matrix Fibroblast |

|               |      |      |      |      |      |    |                   |
|---------------|------|------|------|------|------|----|-------------------|
| Nfix          | 0.36 | 0.00 | 0.00 | 0.46 | 0.17 | 23 | Matrix Fibroblast |
| Mcm3          | 0.40 | 0.00 | 0.00 | 0.26 | 0.07 | 23 | Matrix Fibroblast |
| Tipin         | 0.40 | 0.00 | 0.00 | 0.32 | 0.10 | 23 | Matrix Fibroblast |
| Smchd1        | 0.45 | 0.00 | 0.00 | 0.44 | 0.16 | 23 | Matrix Fibroblast |
| Xpo1          | 0.40 | 0.00 | 0.00 | 0.31 | 0.10 | 23 | Matrix Fibroblast |
| Eln           | 0.37 | 0.00 | 0.00 | 0.44 | 0.16 | 23 | Matrix Fibroblast |
| Nop58         | 0.45 | 0.00 | 0.00 | 0.60 | 0.26 | 23 | Matrix Fibroblast |
| Pa2g4         | 0.41 | 0.00 | 0.00 | 0.61 | 0.26 | 23 | Matrix Fibroblast |
| Rbms3         | 0.33 | 0.00 | 0.00 | 0.46 | 0.17 | 23 | Matrix Fibroblast |
| Zeb2          | 0.43 | 0.00 | 0.00 | 0.68 | 0.31 | 23 | Matrix Fibroblast |
| Brd8          | 0.44 | 0.00 | 0.00 | 0.49 | 0.19 | 23 | Matrix Fibroblast |
| Larp7         | 0.43 | 0.00 | 0.00 | 0.45 | 0.17 | 23 | Matrix Fibroblast |
| Gm6625        | 0.47 | 0.00 | 0.00 | 0.57 | 0.25 | 23 | Matrix Fibroblast |
| 2310022B05Rik | 0.37 | 0.00 | 0.00 | 0.29 | 0.08 | 23 | Matrix Fibroblast |
| Mylk          | 0.37 | 0.00 | 0.00 | 0.64 | 0.27 | 23 | Matrix Fibroblast |
| Pbdc1         | 0.43 | 0.00 | 0.00 | 0.37 | 0.13 | 23 | Matrix Fibroblast |
| Eny2          | 0.43 | 0.00 | 0.00 | 0.55 | 0.23 | 23 | Matrix Fibroblast |
| Hmgb3         | 0.40 | 0.00 | 0.00 | 0.41 | 0.15 | 23 | Matrix Fibroblast |
| Antxr1        | 0.32 | 0.00 | 0.00 | 0.36 | 0.12 | 23 | Matrix Fibroblast |
| Calm2         | 0.58 | 0.00 | 0.00 | 0.91 | 0.64 | 23 | Matrix Fibroblast |
| Fkbp2         | 0.36 | 0.00 | 0.00 | 0.47 | 0.18 | 23 | Matrix Fibroblast |
| Cdk4          | 0.42 | 0.00 | 0.00 | 0.56 | 0.24 | 23 | Matrix Fibroblast |
| Vkorc1        | 0.33 | 0.00 | 0.00 | 0.32 | 0.10 | 23 | Matrix Fibroblast |
| Rpa3          | 0.42 | 0.00 | 0.00 | 0.37 | 0.13 | 23 | Matrix Fibroblast |
| Tbx5          | 0.26 | 0.00 | 0.00 | 0.28 | 0.08 | 23 | Matrix Fibroblast |
| Lsm2          | 0.34 | 0.00 | 0.00 | 0.29 | 0.09 | 23 | Matrix Fibroblast |
| Stub1         | 0.49 | 0.00 | 0.00 | 0.52 | 0.22 | 23 | Matrix Fibroblast |
| Lhfp          | 0.35 | 0.00 | 0.00 | 0.42 | 0.15 | 23 | Matrix Fibroblast |
| G0s2          | 0.27 | 0.00 | 0.00 | 0.39 | 0.13 | 23 | Matrix Fibroblast |
| Fam92a        | 0.35 | 0.00 | 0.00 | 0.31 | 0.10 | 23 | Matrix Fibroblast |
| Phlda1        | 0.58 | 0.00 | 0.00 | 0.49 | 0.20 | 23 | Matrix Fibroblast |
| Rab13         | 0.29 | 0.00 | 0.00 | 0.30 | 0.09 | 23 | Matrix Fibroblast |
| Ilf2          | 0.41 | 0.00 | 0.00 | 0.48 | 0.19 | 23 | Matrix Fibroblast |
| Cbx1          | 0.45 | 0.00 | 0.00 | 0.78 | 0.41 | 23 | Matrix Fibroblast |
| Cep57         | 0.38 | 0.00 | 0.00 | 0.33 | 0.11 | 23 | Matrix Fibroblast |
| Ncaph2        | 0.33 | 0.00 | 0.00 | 0.28 | 0.09 | 23 | Matrix Fibroblast |
| Col6a1        | 0.33 | 0.00 | 0.00 | 0.49 | 0.19 | 23 | Matrix Fibroblast |
| Nptn          | 0.39 | 0.00 | 0.00 | 0.51 | 0.21 | 23 | Matrix Fibroblast |
| Fmr1          | 0.38 | 0.00 | 0.00 | 0.39 | 0.15 | 23 | Matrix Fibroblast |
| Tsen34        | 0.31 | 0.00 | 0.00 | 0.38 | 0.14 | 23 | Matrix Fibroblast |
| Bub3          | 0.41 | 0.00 | 0.00 | 0.38 | 0.14 | 23 | Matrix Fibroblast |
| Nfic          | 0.42 | 0.00 | 0.00 | 0.56 | 0.24 | 23 | Matrix Fibroblast |
| Ccdc82        | 0.34 | 0.00 | 0.00 | 0.25 | 0.07 | 23 | Matrix Fibroblast |

|          |      |      |      |      |      |    |                   |
|----------|------|------|------|------|------|----|-------------------|
| Cpq      | 0.34 | 0.00 | 0.00 | 0.28 | 0.09 | 23 | Matrix Fibroblast |
| Snrpf    | 0.43 | 0.00 | 0.00 | 0.61 | 0.28 | 23 | Matrix Fibroblast |
| Ptges3   | 0.38 | 0.00 | 0.00 | 0.56 | 0.25 | 23 | Matrix Fibroblast |
| Rnaseh2b | 0.26 | 0.00 | 0.00 | 0.27 | 0.08 | 23 | Matrix Fibroblast |
| Ercc6l2  | 0.34 | 0.00 | 0.00 | 0.27 | 0.08 | 23 | Matrix Fibroblast |
| Tpm4     | 0.43 | 0.00 | 0.00 | 0.85 | 0.49 | 23 | Matrix Fibroblast |
| Gm9833   | 0.40 | 0.00 | 0.00 | 0.33 | 0.11 | 23 | Matrix Fibroblast |
| H1f0     | 0.55 | 0.00 | 0.00 | 0.58 | 0.27 | 23 | Matrix Fibroblast |
| Macf1    | 0.56 | 0.00 | 0.00 | 0.81 | 0.52 | 23 | Matrix Fibroblast |
| Tpm1     | 0.40 | 0.00 | 0.00 | 0.86 | 0.52 | 23 | Matrix Fibroblast |
| Nudt21   | 0.29 | 0.00 | 0.00 | 0.36 | 0.12 | 23 | Matrix Fibroblast |
| Hspa14   | 0.31 | 0.00 | 0.00 | 0.32 | 0.10 | 23 | Matrix Fibroblast |
| Kpnb1    | 0.42 | 0.00 | 0.00 | 0.46 | 0.19 | 23 | Matrix Fibroblast |
| Ccdc88a  | 0.47 | 0.00 | 0.00 | 0.55 | 0.24 | 23 | Matrix Fibroblast |
| Smc3     | 0.48 | 0.00 | 0.00 | 0.70 | 0.38 | 23 | Matrix Fibroblast |
| Tns3     | 0.33 | 0.00 | 0.00 | 0.32 | 0.11 | 23 | Matrix Fibroblast |
| Acat1    | 0.41 | 0.00 | 0.00 | 0.44 | 0.18 | 23 | Matrix Fibroblast |
| Mpdz     | 0.31 | 0.00 | 0.00 | 0.26 | 0.08 | 23 | Matrix Fibroblast |
| Anapc13  | 0.33 | 0.00 | 0.00 | 0.50 | 0.21 | 23 | Matrix Fibroblast |
| Spats2l  | 0.30 | 0.00 | 0.00 | 0.28 | 0.09 | 23 | Matrix Fibroblast |
| Ift74    | 0.33 | 0.00 | 0.00 | 0.30 | 0.10 | 23 | Matrix Fibroblast |
| Ikbip    | 0.34 | 0.00 | 0.00 | 0.26 | 0.08 | 23 | Matrix Fibroblast |
| Fkbp7    | 0.28 | 0.00 | 0.00 | 0.37 | 0.13 | 23 | Matrix Fibroblast |
| Pgp      | 0.31 | 0.00 | 0.00 | 0.26 | 0.08 | 23 | Matrix Fibroblast |
| Gm6104   | 0.33 | 0.00 | 0.00 | 0.35 | 0.13 | 23 | Matrix Fibroblast |
| Al597468 | 0.38 | 0.00 | 0.00 | 0.27 | 0.08 | 23 | Matrix Fibroblast |
| Hsd11b1  | 0.35 | 0.00 | 0.00 | 0.29 | 0.09 | 23 | Matrix Fibroblast |
| Ankrd32  | 0.36 | 0.00 | 0.00 | 0.31 | 0.11 | 23 | Matrix Fibroblast |
| Morf4l2  | 0.37 | 0.00 | 0.00 | 0.51 | 0.22 | 23 | Matrix Fibroblast |
| Ndufaf2  | 0.32 | 0.00 | 0.00 | 0.34 | 0.12 | 23 | Matrix Fibroblast |
| Smim4    | 0.32 | 0.00 | 0.00 | 0.35 | 0.12 | 23 | Matrix Fibroblast |
| Mrpl13   | 0.36 | 0.00 | 0.00 | 0.33 | 0.12 | 23 | Matrix Fibroblast |
| Nudcd2   | 0.33 | 0.00 | 0.00 | 0.31 | 0.10 | 23 | Matrix Fibroblast |
| Zyx      | 0.34 | 0.00 | 0.00 | 0.48 | 0.20 | 23 | Matrix Fibroblast |
| Apip     | 0.28 | 0.00 | 0.00 | 0.26 | 0.08 | 23 | Matrix Fibroblast |
| Cdc16    | 0.29 | 0.00 | 0.00 | 0.41 | 0.16 | 23 | Matrix Fibroblast |
| Leo1     | 0.29 | 0.00 | 0.00 | 0.35 | 0.12 | 23 | Matrix Fibroblast |
| Ext1     | 0.29 | 0.00 | 0.00 | 0.26 | 0.08 | 23 | Matrix Fibroblast |
| Atpi1f1  | 0.45 | 0.00 | 0.00 | 0.86 | 0.53 | 23 | Matrix Fibroblast |
| Cd81     | 0.44 | 0.00 | 0.00 | 0.74 | 0.41 | 23 | Matrix Fibroblast |
| Kdelr2   | 0.37 | 0.00 | 0.00 | 0.45 | 0.19 | 23 | Matrix Fibroblast |
| Pmepa1   | 0.33 | 0.00 | 0.00 | 0.32 | 0.11 | 23 | Matrix Fibroblast |
| Pole3    | 0.31 | 0.00 | 0.00 | 0.31 | 0.11 | 23 | Matrix Fibroblast |

|          |      |      |      |      |      |    |                   |
|----------|------|------|------|------|------|----|-------------------|
| Mfge8    | 0.45 | 0.00 | 0.00 | 0.40 | 0.16 | 23 | Matrix Fibroblast |
| Nedd4    | 0.41 | 0.00 | 0.00 | 0.87 | 0.53 | 23 | Matrix Fibroblast |
| Eif4e    | 0.33 | 0.00 | 0.00 | 0.30 | 0.10 | 23 | Matrix Fibroblast |
| Slirp    | 0.30 | 0.00 | 0.00 | 0.51 | 0.22 | 23 | Matrix Fibroblast |
| Hn1      | 0.44 | 0.00 | 0.00 | 0.46 | 0.20 | 23 | Matrix Fibroblast |
| Rfc1     | 0.46 | 0.00 | 0.00 | 0.47 | 0.20 | 23 | Matrix Fibroblast |
| Calm3    | 0.40 | 0.00 | 0.00 | 0.45 | 0.19 | 23 | Matrix Fibroblast |
| Ssr1     | 0.37 | 0.00 | 0.00 | 0.54 | 0.25 | 23 | Matrix Fibroblast |
| Pdzd11   | 0.31 | 0.00 | 0.00 | 0.28 | 0.09 | 23 | Matrix Fibroblast |
| G3bp1    | 0.36 | 0.00 | 0.00 | 0.42 | 0.17 | 23 | Matrix Fibroblast |
| Srrt     | 0.33 | 0.00 | 0.00 | 0.47 | 0.20 | 23 | Matrix Fibroblast |
| Specc1l  | 0.37 | 0.00 | 0.00 | 0.33 | 0.12 | 23 | Matrix Fibroblast |
| Tead1    | 0.34 | 0.00 | 0.00 | 0.36 | 0.14 | 23 | Matrix Fibroblast |
| Ywhaq    | 0.38 | 0.00 | 0.00 | 0.70 | 0.37 | 23 | Matrix Fibroblast |
| Hint1    | 0.42 | 0.00 | 0.00 | 0.78 | 0.46 | 23 | Matrix Fibroblast |
| Smarcc1  | 0.36 | 0.00 | 0.00 | 0.41 | 0.17 | 23 | Matrix Fibroblast |
| Cpm      | 0.51 | 0.00 | 0.00 | 0.42 | 0.18 | 23 | Matrix Fibroblast |
| Mrfap1   | 0.36 | 0.00 | 0.00 | 0.66 | 0.33 | 23 | Matrix Fibroblast |
| Ppic     | 0.35 | 0.00 | 0.00 | 0.73 | 0.38 | 23 | Matrix Fibroblast |
| Fkbp3    | 0.43 | 0.00 | 0.00 | 0.59 | 0.30 | 23 | Matrix Fibroblast |
| Srsf2    | 0.40 | 0.00 | 0.00 | 0.71 | 0.38 | 23 | Matrix Fibroblast |
| Matr3    | 0.43 | 0.00 | 0.00 | 0.73 | 0.41 | 23 | Matrix Fibroblast |
| Pdlim2   | 0.35 | 0.00 | 0.00 | 0.42 | 0.18 | 23 | Matrix Fibroblast |
| Cbx6     | 0.28 | 0.00 | 0.00 | 0.30 | 0.11 | 23 | Matrix Fibroblast |
| Clic4    | 0.33 | 0.00 | 0.00 | 0.60 | 0.29 | 23 | Matrix Fibroblast |
| Pdap1    | 0.43 | 0.00 | 0.00 | 0.77 | 0.45 | 23 | Matrix Fibroblast |
| Cep290   | 0.32 | 0.00 | 0.00 | 0.28 | 0.10 | 23 | Matrix Fibroblast |
| Erh      | 0.37 | 0.00 | 0.00 | 0.59 | 0.28 | 23 | Matrix Fibroblast |
| Myef2    | 0.38 | 0.00 | 0.00 | 0.38 | 0.16 | 23 | Matrix Fibroblast |
| Ctdspl2  | 0.34 | 0.00 | 0.00 | 0.31 | 0.11 | 23 | Matrix Fibroblast |
| Dkc1     | 0.33 | 0.00 | 0.00 | 0.31 | 0.12 | 23 | Matrix Fibroblast |
| Blmh     | 0.34 | 0.00 | 0.00 | 0.41 | 0.17 | 23 | Matrix Fibroblast |
| Gclm     | 0.39 | 0.00 | 0.00 | 0.74 | 0.42 | 23 | Matrix Fibroblast |
| Anapc11  | 0.33 | 0.00 | 0.00 | 0.41 | 0.17 | 23 | Matrix Fibroblast |
| Hnrnph1  | 0.40 | 0.00 | 0.00 | 0.69 | 0.38 | 23 | Matrix Fibroblast |
| Gm12728  | 0.32 | 0.00 | 0.00 | 0.41 | 0.17 | 23 | Matrix Fibroblast |
| Gm9242   | 0.39 | 0.00 | 0.00 | 0.50 | 0.24 | 23 | Matrix Fibroblast |
| Slc25a4  | 0.35 | 0.00 | 0.00 | 0.82 | 0.50 | 23 | Matrix Fibroblast |
| Mmp14    | 0.35 | 0.00 | 0.00 | 0.54 | 0.25 | 23 | Matrix Fibroblast |
| Htatsf1  | 0.31 | 0.00 | 0.00 | 0.55 | 0.26 | 23 | Matrix Fibroblast |
| Rnaseh2c | 0.27 | 0.00 | 0.00 | 0.29 | 0.11 | 23 | Matrix Fibroblast |
| Smarca5  | 0.35 | 0.00 | 0.00 | 0.60 | 0.30 | 23 | Matrix Fibroblast |
| Timp2    | 0.27 | 0.00 | 0.00 | 0.48 | 0.21 | 23 | Matrix Fibroblast |

|               |      |      |      |      |      |    |                   |
|---------------|------|------|------|------|------|----|-------------------|
| Nsmce1        | 0.25 | 0.00 | 0.00 | 0.35 | 0.14 | 23 | Matrix Fibroblast |
| Tgfb2         | 0.46 | 0.00 | 0.00 | 0.35 | 0.14 | 23 | Matrix Fibroblast |
| Nrep          | 0.28 | 0.00 | 0.00 | 0.77 | 0.43 | 23 | Matrix Fibroblast |
| Gm8991        | 0.32 | 0.00 | 0.00 | 0.50 | 0.23 | 23 | Matrix Fibroblast |
| Hp1bp3        | 0.41 | 0.00 | 0.00 | 0.76 | 0.44 | 23 | Matrix Fibroblast |
| Fgfr1         | 0.29 | 0.00 | 0.00 | 0.29 | 0.11 | 23 | Matrix Fibroblast |
| Dnajc10       | 0.38 | 0.00 | 0.00 | 0.36 | 0.15 | 23 | Matrix Fibroblast |
| Hnrnpa3       | 0.39 | 0.00 | 0.00 | 0.78 | 0.46 | 23 | Matrix Fibroblast |
| Ube2e3        | 0.29 | 0.00 | 0.00 | 0.35 | 0.14 | 23 | Matrix Fibroblast |
| Tagln2        | 0.40 | 0.00 | 0.00 | 0.76 | 0.45 | 23 | Matrix Fibroblast |
| F2r           | 0.33 | 0.00 | 0.00 | 0.36 | 0.14 | 23 | Matrix Fibroblast |
| Ndufa5        | 0.31 | 0.00 | 0.00 | 0.54 | 0.26 | 23 | Matrix Fibroblast |
| Rbm3          | 0.40 | 0.00 | 0.00 | 0.70 | 0.41 | 23 | Matrix Fibroblast |
| Casp8ap2      | 0.37 | 0.00 | 0.00 | 0.40 | 0.17 | 23 | Matrix Fibroblast |
| Srsf3         | 0.40 | 0.00 | 0.00 | 0.76 | 0.45 | 23 | Matrix Fibroblast |
| Rnf168        | 0.27 | 0.00 | 0.00 | 0.34 | 0.14 | 23 | Matrix Fibroblast |
| Epb4.1l2      | 0.34 | 0.00 | 0.00 | 0.43 | 0.19 | 23 | Matrix Fibroblast |
| Gm12355       | 0.33 | 0.00 | 0.00 | 0.54 | 0.26 | 23 | Matrix Fibroblast |
| Gm6793        | 0.37 | 0.00 | 0.00 | 0.58 | 0.30 | 23 | Matrix Fibroblast |
| Ctcf          | 0.43 | 0.00 | 0.00 | 0.49 | 0.23 | 23 | Matrix Fibroblast |
| Rcn2          | 0.26 | 0.00 | 0.00 | 0.37 | 0.15 | 23 | Matrix Fibroblast |
| Tmsb10        | 0.41 | 0.00 | 0.00 | 0.98 | 0.86 | 23 | Matrix Fibroblast |
| Nudc          | 0.32 | 0.00 | 0.00 | 0.45 | 0.21 | 23 | Matrix Fibroblast |
| Actn1         | 0.33 | 0.00 | 0.00 | 0.48 | 0.23 | 23 | Matrix Fibroblast |
| Cnep1r1       | 0.25 | 0.00 | 0.00 | 0.30 | 0.11 | 23 | Matrix Fibroblast |
| Nenf          | 0.25 | 0.00 | 0.00 | 0.42 | 0.18 | 23 | Matrix Fibroblast |
| Hdgf          | 0.29 | 0.00 | 0.00 | 0.52 | 0.25 | 23 | Matrix Fibroblast |
| Pros1         | 0.26 | 0.00 | 0.00 | 0.28 | 0.10 | 23 | Matrix Fibroblast |
| Hnrnpab       | 0.35 | 0.00 | 0.00 | 0.62 | 0.33 | 23 | Matrix Fibroblast |
| Thoc7         | 0.35 | 0.00 | 0.00 | 0.61 | 0.32 | 23 | Matrix Fibroblast |
| Polr2m        | 0.25 | 0.00 | 0.00 | 0.39 | 0.17 | 23 | Matrix Fibroblast |
| Gm10108       | 0.30 | 0.00 | 0.00 | 0.33 | 0.14 | 23 | Matrix Fibroblast |
| Snrpg         | 0.30 | 0.00 | 0.00 | 0.72 | 0.39 | 23 | Matrix Fibroblast |
| Zranb2        | 0.31 | 0.00 | 0.00 | 0.53 | 0.25 | 23 | Matrix Fibroblast |
| Sumo2         | 0.33 | 0.00 | 0.00 | 0.59 | 0.30 | 23 | Matrix Fibroblast |
| Tsix          | 0.34 | 0.00 | 0.00 | 0.41 | 0.18 | 23 | Matrix Fibroblast |
| A630007B06Rik | 0.34 | 0.00 | 0.00 | 0.43 | 0.20 | 23 | Matrix Fibroblast |
| Brd3          | 0.32 | 0.00 | 0.00 | 0.53 | 0.25 | 23 | Matrix Fibroblast |
| Cnn2          | 0.35 | 0.00 | 0.00 | 0.70 | 0.39 | 23 | Matrix Fibroblast |
| Magt1         | 0.27 | 0.00 | 0.00 | 0.44 | 0.20 | 23 | Matrix Fibroblast |
| Msl3          | 0.27 | 0.00 | 0.00 | 0.35 | 0.14 | 23 | Matrix Fibroblast |
| Rad50         | 0.30 | 0.00 | 0.00 | 0.43 | 0.19 | 23 | Matrix Fibroblast |
| Sec13         | 0.30 | 0.00 | 0.00 | 0.39 | 0.17 | 23 | Matrix Fibroblast |

|          |      |      |      |      |      |    |                   |
|----------|------|------|------|------|------|----|-------------------|
| Serpinh1 | 0.34 | 0.00 | 0.00 | 0.69 | 0.39 | 23 | Matrix Fibroblast |
| Pbx1     | 0.32 | 0.00 | 0.00 | 0.43 | 0.20 | 23 | Matrix Fibroblast |
| Arl6ip1  | 0.65 | 0.00 | 0.00 | 0.77 | 0.52 | 23 | Matrix Fibroblast |
| Hsp90b1  | 0.35 | 0.00 | 0.00 | 0.94 | 0.76 | 23 | Matrix Fibroblast |
| Mxra8    | 0.28 | 0.00 | 0.00 | 0.38 | 0.16 | 23 | Matrix Fibroblast |
| Gm10053  | 0.34 | 0.00 | 0.00 | 0.46 | 0.22 | 23 | Matrix Fibroblast |
| Sarnp    | 0.29 | 0.00 | 0.00 | 0.52 | 0.25 | 23 | Matrix Fibroblast |
| Gmps     | 0.32 | 0.00 | 0.00 | 0.29 | 0.11 | 23 | Matrix Fibroblast |
| Anapc5   | 0.25 | 0.00 | 0.00 | 0.41 | 0.18 | 23 | Matrix Fibroblast |
| Mrpl18   | 0.28 | 0.00 | 0.00 | 0.45 | 0.21 | 23 | Matrix Fibroblast |
| Gm5641   | 0.33 | 0.00 | 0.00 | 0.66 | 0.37 | 23 | Matrix Fibroblast |
| Parp2    | 0.25 | 0.00 | 0.00 | 0.28 | 0.10 | 23 | Matrix Fibroblast |
| Atp5o    | 0.31 | 0.00 | 0.00 | 0.65 | 0.35 | 23 | Matrix Fibroblast |
| Ywhah    | 0.27 | 0.00 | 0.00 | 0.53 | 0.26 | 23 | Matrix Fibroblast |
| Igfbp4   | 0.30 | 0.00 | 0.00 | 0.51 | 0.25 | 23 | Matrix Fibroblast |
| Pds5b    | 0.32 | 0.00 | 0.00 | 0.31 | 0.13 | 23 | Matrix Fibroblast |
| Naa50    | 0.31 | 0.00 | 0.00 | 0.32 | 0.13 | 23 | Matrix Fibroblast |
| Snrpd2   | 0.25 | 0.00 | 0.00 | 0.51 | 0.25 | 23 | Matrix Fibroblast |
| Uba2     | 0.25 | 0.00 | 0.00 | 0.29 | 0.11 | 23 | Matrix Fibroblast |
| Golim4   | 0.29 | 0.00 | 0.00 | 0.43 | 0.20 | 23 | Matrix Fibroblast |
| Rbbp4    | 0.27 | 0.00 | 0.00 | 0.43 | 0.20 | 23 | Matrix Fibroblast |
| Nhp2l1   | 0.29 | 0.00 | 0.00 | 0.42 | 0.19 | 23 | Matrix Fibroblast |
| Tagln    | 0.36 | 0.00 | 0.00 | 0.34 | 0.15 | 23 | Matrix Fibroblast |
| Cox20    | 0.26 | 0.00 | 0.00 | 0.40 | 0.18 | 23 | Matrix Fibroblast |
| Wbp5     | 0.26 | 0.00 | 0.00 | 0.80 | 0.48 | 23 | Matrix Fibroblast |
| Purb     | 0.32 | 0.00 | 0.00 | 0.66 | 0.37 | 23 | Matrix Fibroblast |
| Tcf12    | 0.32 | 0.00 | 0.00 | 0.38 | 0.17 | 23 | Matrix Fibroblast |
| Cycs     | 0.31 | 0.00 | 0.00 | 0.44 | 0.22 | 23 | Matrix Fibroblast |
| Nfyb     | 0.27 | 0.00 | 0.00 | 0.29 | 0.12 | 23 | Matrix Fibroblast |
| Syncrip  | 0.28 | 0.00 | 0.00 | 0.49 | 0.25 | 23 | Matrix Fibroblast |
| Zfhx3    | 0.32 | 0.00 | 0.00 | 0.37 | 0.17 | 23 | Matrix Fibroblast |
| Mfap2    | 0.27 | 0.00 | 0.00 | 0.65 | 0.35 | 23 | Matrix Fibroblast |
| Siva1    | 0.31 | 0.00 | 0.00 | 0.33 | 0.15 | 23 | Matrix Fibroblast |
| Tmem256  | 0.27 | 0.00 | 0.00 | 0.61 | 0.33 | 23 | Matrix Fibroblast |
| Supt16   | 0.30 | 0.00 | 0.00 | 0.49 | 0.25 | 23 | Matrix Fibroblast |
| Pcdhga9  | 0.25 | 0.00 | 0.00 | 0.38 | 0.18 | 23 | Matrix Fibroblast |
| Srsf7    | 0.28 | 0.00 | 0.00 | 0.35 | 0.16 | 23 | Matrix Fibroblast |
| Hnrnpdl  | 0.31 | 0.00 | 0.00 | 0.64 | 0.37 | 23 | Matrix Fibroblast |
| Hnrnpa1  | 0.30 | 0.00 | 0.00 | 0.52 | 0.27 | 23 | Matrix Fibroblast |
| Hadh     | 0.28 | 0.00 | 0.00 | 0.37 | 0.17 | 23 | Matrix Fibroblast |
| Taf9     | 0.28 | 0.00 | 0.00 | 0.39 | 0.18 | 23 | Matrix Fibroblast |
| Hdac2    | 0.26 | 0.00 | 0.00 | 0.35 | 0.15 | 23 | Matrix Fibroblast |
| Mbnl2    | 0.29 | 0.00 | 0.00 | 0.62 | 0.35 | 23 | Matrix Fibroblast |

|               |      |      |      |      |      |    |                   |
|---------------|------|------|------|------|------|----|-------------------|
| Lamc1         | 0.26 | 0.00 | 0.00 | 0.35 | 0.16 | 23 | Matrix Fibroblast |
| Smc5          | 0.29 | 0.00 | 0.00 | 0.36 | 0.16 | 23 | Matrix Fibroblast |
| Gtf2h5        | 0.28 | 0.00 | 0.00 | 0.53 | 0.28 | 23 | Matrix Fibroblast |
| Cox7a2        | 0.32 | 0.00 | 0.00 | 0.76 | 0.48 | 23 | Matrix Fibroblast |
| Nin           | 0.27 | 0.00 | 0.00 | 0.32 | 0.14 | 23 | Matrix Fibroblast |
| Cetn3         | 0.30 | 0.00 | 0.00 | 0.56 | 0.31 | 23 | Matrix Fibroblast |
| Xist          | 0.38 | 0.00 | 0.00 | 0.76 | 0.51 | 23 | Matrix Fibroblast |
| Pdcd5         | 0.25 | 0.00 | 0.00 | 0.53 | 0.28 | 23 | Matrix Fibroblast |
| Tmed3         | 0.25 | 0.00 | 0.00 | 0.29 | 0.13 | 23 | Matrix Fibroblast |
| Tceb1         | 0.27 | 0.00 | 0.00 | 0.45 | 0.23 | 23 | Matrix Fibroblast |
| Pnrc2         | 0.29 | 0.00 | 0.00 | 0.39 | 0.19 | 23 | Matrix Fibroblast |
| Hnrnpu        | 0.25 | 0.00 | 0.00 | 0.88 | 0.64 | 23 | Matrix Fibroblast |
| Pde5a         | 0.33 | 0.00 | 0.00 | 0.28 | 0.12 | 23 | Matrix Fibroblast |
| Rif1          | 0.30 | 0.00 | 0.00 | 0.35 | 0.17 | 23 | Matrix Fibroblast |
| P4hb          | 0.28 | 0.00 | 0.00 | 0.67 | 0.40 | 23 | Matrix Fibroblast |
| Tceb2         | 0.31 | 0.00 | 0.00 | 0.73 | 0.47 | 23 | Matrix Fibroblast |
| Suz12         | 0.32 | 0.00 | 0.00 | 0.29 | 0.13 | 23 | Matrix Fibroblast |
| Gm20091       | 0.27 | 0.00 | 0.00 | 0.43 | 0.22 | 23 | Matrix Fibroblast |
| Hnrnpa2b1     | 0.30 | 0.00 | 0.00 | 0.91 | 0.72 | 23 | Matrix Fibroblast |
| H3f3b         | 0.31 | 0.00 | 0.00 | 0.98 | 0.89 | 23 | Matrix Fibroblast |
| Mat2a         | 0.26 | 0.00 | 0.00 | 0.50 | 0.27 | 23 | Matrix Fibroblast |
| Cox7c         | 0.28 | 0.00 | 0.00 | 0.87 | 0.63 | 23 | Matrix Fibroblast |
| Hnrnpa0       | 0.25 | 0.00 | 0.00 | 0.42 | 0.21 | 23 | Matrix Fibroblast |
| Hist1h2bc     | 0.52 | 0.00 | 0.00 | 0.29 | 0.14 | 23 | Matrix Fibroblast |
| Srrm1         | 0.28 | 0.00 | 0.00 | 0.73 | 0.48 | 23 | Matrix Fibroblast |
| Sec61g        | 0.32 | 0.00 | 0.00 | 0.57 | 0.35 | 23 | Matrix Fibroblast |
| Syne2         | 0.25 | 0.00 | 0.00 | 0.30 | 0.14 | 23 | Matrix Fibroblast |
| Fermt2        | 0.29 | 0.00 | 0.00 | 0.67 | 0.39 | 23 | Matrix Fibroblast |
| Gm5611        | 0.26 | 0.00 | 0.00 | 0.57 | 0.36 | 23 | Matrix Fibroblast |
| Morf4l1       | 0.26 | 0.00 | 0.00 | 0.77 | 0.55 | 23 | Matrix Fibroblast |
| Csrp2         | 0.33 | 0.00 | 0.00 | 0.32 | 0.17 | 23 | Matrix Fibroblast |
| Top2a         | 2.16 | 0.00 | 0.00 | 0.90 | 0.11 | 24 | Matrix Fibroblast |
| Cenpf         | 2.05 | 0.00 | 0.00 | 0.76 | 0.08 | 24 | Matrix Fibroblast |
| Mki67         | 2.00 | 0.00 | 0.00 | 0.95 | 0.12 | 24 | Matrix Fibroblast |
| Prc1          | 1.96 | 0.00 | 0.00 | 0.78 | 0.06 | 24 | Matrix Fibroblast |
| 2810417H13Rik | 1.94 | 0.00 | 0.00 | 0.87 | 0.08 | 24 | Matrix Fibroblast |
| Htra1         | 1.84 | 0.00 | 0.00 | 0.85 | 0.08 | 24 | Matrix Fibroblast |
| Cenpe         | 1.80 | 0.00 | 0.00 | 0.72 | 0.08 | 24 | Matrix Fibroblast |
| Nusap1        | 1.73 | 0.00 | 0.00 | 0.74 | 0.05 | 24 | Matrix Fibroblast |
| Ube2c         | 1.73 | 0.00 | 0.00 | 0.64 | 0.05 | 24 | Matrix Fibroblast |
| Tpx2          | 1.61 | 0.00 | 0.00 | 0.72 | 0.05 | 24 | Matrix Fibroblast |
| Hmmr          | 1.61 | 0.00 | 0.00 | 0.66 | 0.04 | 24 | Matrix Fibroblast |
| Spc25         | 1.60 | 0.00 | 0.00 | 0.68 | 0.05 | 24 | Matrix Fibroblast |

|              |      |      |      |      |      |    |                   |
|--------------|------|------|------|------|------|----|-------------------|
| Cks2         | 1.57 | 0.00 | 0.00 | 0.71 | 0.08 | 24 | Matrix Fibroblast |
| Prss35       | 1.52 | 0.00 | 0.00 | 0.68 | 0.07 | 24 | Matrix Fibroblast |
| Ckap2l       | 1.51 | 0.00 | 0.00 | 0.65 | 0.04 | 24 | Matrix Fibroblast |
| Birc5        | 1.51 | 0.00 | 0.00 | 0.71 | 0.06 | 24 | Matrix Fibroblast |
| Ccnb2        | 1.46 | 0.00 | 0.00 | 0.67 | 0.06 | 24 | Matrix Fibroblast |
| Diap3        | 1.43 | 0.00 | 0.00 | 0.68 | 0.06 | 24 | Matrix Fibroblast |
| Cdk1         | 1.43 | 0.00 | 0.00 | 0.64 | 0.05 | 24 | Matrix Fibroblast |
| Ncapg        | 1.42 | 0.00 | 0.00 | 0.65 | 0.04 | 24 | Matrix Fibroblast |
| Kif23        | 1.39 | 0.00 | 0.00 | 0.61 | 0.05 | 24 | Matrix Fibroblast |
| Sgol2        | 1.37 | 0.00 | 0.00 | 0.57 | 0.04 | 24 | Matrix Fibroblast |
| Kif11        | 1.37 | 0.00 | 0.00 | 0.63 | 0.04 | 24 | Matrix Fibroblast |
| Ckap2        | 1.34 | 0.00 | 0.00 | 0.57 | 0.04 | 24 | Matrix Fibroblast |
| P2ry14       | 1.32 | 0.00 | 0.00 | 0.73 | 0.08 | 24 | Matrix Fibroblast |
| Anln         | 1.31 | 0.00 | 0.00 | 0.58 | 0.03 | 24 | Matrix Fibroblast |
| RP23-45G16.5 | 1.30 | 0.00 | 0.00 | 0.60 | 0.05 | 24 | Matrix Fibroblast |
| Ccna2        | 1.25 | 0.00 | 0.00 | 0.56 | 0.04 | 24 | Matrix Fibroblast |
| Rrm2         | 1.25 | 0.00 | 0.00 | 0.55 | 0.05 | 24 | Matrix Fibroblast |
| Kif15        | 1.24 | 0.00 | 0.00 | 0.56 | 0.04 | 24 | Matrix Fibroblast |
| Casc5        | 1.22 | 0.00 | 0.00 | 0.53 | 0.04 | 24 | Matrix Fibroblast |
| Esco2        | 1.22 | 0.00 | 0.00 | 0.52 | 0.03 | 24 | Matrix Fibroblast |
| Egfm1        | 1.20 | 0.00 | 0.00 | 0.62 | 0.05 | 24 | Matrix Fibroblast |
| Pbk          | 1.19 | 0.00 | 0.00 | 0.52 | 0.03 | 24 | Matrix Fibroblast |
| Spc24        | 1.18 | 0.00 | 0.00 | 0.59 | 0.05 | 24 | Matrix Fibroblast |
| Ndc80        | 1.17 | 0.00 | 0.00 | 0.51 | 0.04 | 24 | Matrix Fibroblast |
| Cdca3        | 1.17 | 0.00 | 0.00 | 0.52 | 0.03 | 24 | Matrix Fibroblast |
| Mis18bp1     | 1.13 | 0.00 | 0.00 | 0.47 | 0.03 | 24 | Matrix Fibroblast |
| Nuf2         | 1.10 | 0.00 | 0.00 | 0.52 | 0.03 | 24 | Matrix Fibroblast |
| Aspm         | 1.07 | 0.00 | 0.00 | 0.46 | 0.03 | 24 | Matrix Fibroblast |
| Ccnb1        | 1.00 | 0.00 | 0.00 | 0.40 | 0.02 | 24 | Matrix Fibroblast |
| Bub1         | 0.98 | 0.00 | 0.00 | 0.42 | 0.02 | 24 | Matrix Fibroblast |
| Depdc1a      | 0.94 | 0.00 | 0.00 | 0.39 | 0.02 | 24 | Matrix Fibroblast |
| Ect2         | 0.92 | 0.00 | 0.00 | 0.42 | 0.02 | 24 | Matrix Fibroblast |
| Mxd3         | 0.80 | 0.00 | 0.00 | 0.35 | 0.02 | 24 | Matrix Fibroblast |
| Shcbp1       | 0.71 | 0.00 | 0.00 | 0.31 | 0.01 | 24 | Matrix Fibroblast |
| Pdgfra       | 1.26 | 0.00 | 0.00 | 0.61 | 0.06 | 24 | Matrix Fibroblast |
| Racgap1      | 1.01 | 0.00 | 0.00 | 0.49 | 0.04 | 24 | Matrix Fibroblast |
| Fam64a       | 0.83 | 0.00 | 0.00 | 0.36 | 0.02 | 24 | Matrix Fibroblast |
| Neil3        | 0.83 | 0.00 | 0.00 | 0.39 | 0.02 | 24 | Matrix Fibroblast |
| Ska1         | 0.74 | 0.00 | 0.00 | 0.35 | 0.02 | 24 | Matrix Fibroblast |
| Incenp       | 1.41 | 0.00 | 0.00 | 0.69 | 0.08 | 24 | Matrix Fibroblast |
| Prr11        | 0.87 | 0.00 | 0.00 | 0.35 | 0.02 | 24 | Matrix Fibroblast |
| Cdca8        | 1.15 | 0.00 | 0.00 | 0.55 | 0.05 | 24 | Matrix Fibroblast |
| Cdca2        | 0.79 | 0.00 | 0.00 | 0.35 | 0.02 | 24 | Matrix Fibroblast |

|               |      |      |      |      |      |    |                   |
|---------------|------|------|------|------|------|----|-------------------|
| C330027C09Rik | 0.96 | 0.00 | 0.00 | 0.42 | 0.03 | 24 | Matrix Fibroblast |
| Knstrn        | 1.22 | 0.00 | 0.00 | 0.47 | 0.04 | 24 | Matrix Fibroblast |
| Tacc3         | 1.13 | 0.00 | 0.00 | 0.57 | 0.05 | 24 | Matrix Fibroblast |
| Cenpp         | 0.70 | 0.00 | 0.00 | 0.33 | 0.02 | 24 | Matrix Fibroblast |
| Smc2          | 1.66 | 0.00 | 0.00 | 0.84 | 0.13 | 24 | Matrix Fibroblast |
| Cdc20         | 1.34 | 0.00 | 0.00 | 0.52 | 0.05 | 24 | Matrix Fibroblast |
| Agt           | 1.25 | 0.00 | 0.00 | 0.76 | 0.10 | 24 | Matrix Fibroblast |
| Kif22         | 0.82 | 0.00 | 0.00 | 0.37 | 0.02 | 24 | Matrix Fibroblast |
| Tnc           | 1.45 | 0.00 | 0.00 | 0.88 | 0.14 | 24 | Matrix Fibroblast |
| Kif20b        | 1.45 | 0.00 | 0.00 | 0.60 | 0.06 | 24 | Matrix Fibroblast |
| Plk1          | 0.69 | 0.00 | 0.00 | 0.30 | 0.02 | 24 | Matrix Fibroblast |
| Cenpa         | 1.56 | 0.00 | 0.00 | 0.59 | 0.06 | 24 | Matrix Fibroblast |
| Hist1h2ae     | 1.66 | 0.00 | 0.00 | 0.68 | 0.09 | 24 | Matrix Fibroblast |
| Pdlim3        | 1.10 | 0.00 | 0.00 | 0.60 | 0.06 | 24 | Matrix Fibroblast |
| Melk          | 0.76 | 0.00 | 0.00 | 0.30 | 0.02 | 24 | Matrix Fibroblast |
| Cd248         | 1.00 | 0.00 | 0.00 | 0.52 | 0.05 | 24 | Matrix Fibroblast |
| Hist1h2ad     | 1.81 | 0.00 | 0.00 | 0.72 | 0.10 | 24 | Matrix Fibroblast |
| Cks1b         | 1.29 | 0.00 | 0.00 | 0.70 | 0.09 | 24 | Matrix Fibroblast |
| Hist1h2ak     | 1.52 | 0.00 | 0.00 | 0.62 | 0.07 | 24 | Matrix Fibroblast |
| Kif2c         | 0.64 | 0.00 | 0.00 | 0.28 | 0.02 | 24 | Matrix Fibroblast |
| Aurkb         | 0.81 | 0.00 | 0.00 | 0.37 | 0.03 | 24 | Matrix Fibroblast |
| Tenm4         | 0.93 | 0.00 | 0.00 | 0.43 | 0.04 | 24 | Matrix Fibroblast |
| Tubb6         | 1.15 | 0.00 | 0.00 | 0.62 | 0.07 | 24 | Matrix Fibroblast |
| Hist1h2ab     | 1.65 | 0.00 | 0.00 | 0.67 | 0.09 | 24 | Matrix Fibroblast |
| Hist1h2ai     | 1.69 | 0.00 | 0.00 | 0.69 | 0.10 | 24 | Matrix Fibroblast |
| Ncapd2        | 0.96 | 0.00 | 0.00 | 0.47 | 0.04 | 24 | Matrix Fibroblast |
| Hist1h2ac     | 1.77 | 0.00 | 0.00 | 0.71 | 0.10 | 24 | Matrix Fibroblast |
| Hist1h2an     | 1.72 | 0.00 | 0.00 | 0.66 | 0.09 | 24 | Matrix Fibroblast |
| Hist1h2ap     | 2.15 | 0.00 | 0.00 | 0.81 | 0.15 | 24 | Matrix Fibroblast |
| Kifc1         | 0.63 | 0.00 | 0.00 | 0.29 | 0.02 | 24 | Matrix Fibroblast |
| Tk1           | 0.93 | 0.00 | 0.00 | 0.40 | 0.03 | 24 | Matrix Fibroblast |
| Hist1h2af     | 1.66 | 0.00 | 0.00 | 0.66 | 0.09 | 24 | Matrix Fibroblast |
| Hist1h2ah     | 1.67 | 0.00 | 0.00 | 0.67 | 0.09 | 24 | Matrix Fibroblast |
| Kif20a        | 0.81 | 0.00 | 0.00 | 0.33 | 0.02 | 24 | Matrix Fibroblast |
| Sgol1         | 0.90 | 0.00 | 0.00 | 0.37 | 0.03 | 24 | Matrix Fibroblast |
| Tgfb1         | 1.38 | 0.00 | 0.00 | 0.95 | 0.19 | 24 | Matrix Fibroblast |
| Fbxo5         | 1.04 | 0.00 | 0.00 | 0.47 | 0.04 | 24 | Matrix Fibroblast |
| Hist1h2ag     | 1.87 | 0.00 | 0.00 | 0.73 | 0.12 | 24 | Matrix Fibroblast |
| Myh11         | 1.00 | 0.00 | 0.00 | 0.74 | 0.10 | 24 | Matrix Fibroblast |
| Dlgap5        | 0.90 | 0.00 | 0.00 | 0.35 | 0.03 | 24 | Matrix Fibroblast |
| Sdc2          | 1.24 | 0.00 | 0.00 | 0.77 | 0.12 | 24 | Matrix Fibroblast |
| Bub1b         | 0.76 | 0.00 | 0.00 | 0.33 | 0.02 | 24 | Matrix Fibroblast |
| Hist1h2ao     | 2.12 | 0.00 | 0.00 | 0.80 | 0.15 | 24 | Matrix Fibroblast |

|             |      |      |      |      |      |    |                   |
|-------------|------|------|------|------|------|----|-------------------|
| Arhgap11a   | 1.04 | 0.00 | 0.00 | 0.44 | 0.04 | 24 | Matrix Fibroblast |
| Cenpm       | 0.69 | 0.00 | 0.00 | 0.33 | 0.02 | 24 | Matrix Fibroblast |
| Cenpk       | 0.89 | 0.00 | 0.00 | 0.40 | 0.04 | 24 | Matrix Fibroblast |
| Mns1        | 0.89 | 0.00 | 0.00 | 0.43 | 0.04 | 24 | Matrix Fibroblast |
| Hlf         | 0.90 | 0.00 | 0.00 | 0.47 | 0.05 | 24 | Matrix Fibroblast |
| Robo2       | 1.04 | 0.00 | 0.00 | 0.64 | 0.09 | 24 | Matrix Fibroblast |
| Zwilch      | 0.65 | 0.00 | 0.00 | 0.27 | 0.02 | 24 | Matrix Fibroblast |
| Fbln1       | 0.83 | 0.00 | 0.00 | 0.49 | 0.05 | 24 | Matrix Fibroblast |
| Wnt5a       | 1.19 | 0.00 | 0.00 | 0.68 | 0.10 | 24 | Matrix Fibroblast |
| Mad2l1      | 0.69 | 0.00 | 0.00 | 0.32 | 0.02 | 24 | Matrix Fibroblast |
| Ska3        | 0.56 | 0.00 | 0.00 | 0.27 | 0.02 | 24 | Matrix Fibroblast |
| H2afx       | 1.18 | 0.00 | 0.00 | 0.63 | 0.09 | 24 | Matrix Fibroblast |
| Olfml2b     | 0.95 | 0.00 | 0.00 | 0.53 | 0.06 | 24 | Matrix Fibroblast |
| Vsnl1       | 0.66 | 0.00 | 0.00 | 0.28 | 0.02 | 24 | Matrix Fibroblast |
| Etv1        | 0.95 | 0.00 | 0.00 | 0.56 | 0.07 | 24 | Matrix Fibroblast |
| Ltbp2       | 0.94 | 0.00 | 0.00 | 0.65 | 0.09 | 24 | Matrix Fibroblast |
| Ccdc34      | 1.30 | 0.00 | 0.00 | 0.74 | 0.14 | 24 | Matrix Fibroblast |
| Pde5a       | 1.11 | 0.00 | 0.00 | 0.70 | 0.11 | 24 | Matrix Fibroblast |
| Hist1h1b    | 1.14 | 0.00 | 0.00 | 0.38 | 0.04 | 24 | Matrix Fibroblast |
| Plk4        | 0.80 | 0.00 | 0.00 | 0.41 | 0.04 | 24 | Matrix Fibroblast |
| Stmn1       | 1.52 | 0.00 | 0.00 | 0.90 | 0.23 | 24 | Matrix Fibroblast |
| Kif4        | 0.77 | 0.00 | 0.00 | 0.31 | 0.03 | 24 | Matrix Fibroblast |
| D17H6S56E-5 | 0.98 | 0.00 | 0.00 | 0.66 | 0.10 | 24 | Matrix Fibroblast |
| Fndc1       | 0.83 | 0.00 | 0.00 | 0.45 | 0.05 | 24 | Matrix Fibroblast |
| Spon2       | 0.92 | 0.00 | 0.00 | 0.51 | 0.06 | 24 | Matrix Fibroblast |
| Wnt11       | 0.67 | 0.00 | 0.00 | 0.30 | 0.02 | 24 | Matrix Fibroblast |
| Fam129a     | 1.00 | 0.00 | 0.00 | 0.58 | 0.08 | 24 | Matrix Fibroblast |
| Chn1        | 0.71 | 0.00 | 0.00 | 0.35 | 0.03 | 24 | Matrix Fibroblast |
| Cenph       | 0.79 | 0.00 | 0.00 | 0.35 | 0.03 | 24 | Matrix Fibroblast |
| Cdkn2c      | 0.85 | 0.00 | 0.00 | 0.40 | 0.04 | 24 | Matrix Fibroblast |
| Cep55       | 0.72 | 0.00 | 0.00 | 0.31 | 0.03 | 24 | Matrix Fibroblast |
| Trip13      | 0.61 | 0.00 | 0.00 | 0.27 | 0.02 | 24 | Matrix Fibroblast |
| Spdl1       | 0.62 | 0.00 | 0.00 | 0.27 | 0.02 | 24 | Matrix Fibroblast |
| Car2        | 1.58 | 0.00 | 0.00 | 0.92 | 0.30 | 24 | Matrix Fibroblast |
| Aurka       | 0.55 | 0.00 | 0.00 | 0.26 | 0.02 | 24 | Matrix Fibroblast |
| Gm10259     | 1.08 | 0.00 | 0.00 | 0.46 | 0.06 | 24 | Matrix Fibroblast |
| Hmgb2       | 1.63 | 0.00 | 0.00 | 0.99 | 0.42 | 24 | Matrix Fibroblast |
| Hirip3      | 1.11 | 0.00 | 0.00 | 0.56 | 0.09 | 24 | Matrix Fibroblast |
| C1qtnf7     | 1.05 | 0.00 | 0.00 | 0.58 | 0.09 | 24 | Matrix Fibroblast |
| Clspn       | 0.86 | 0.00 | 0.00 | 0.38 | 0.04 | 24 | Matrix Fibroblast |
| Hjurp       | 1.19 | 0.00 | 0.00 | 0.71 | 0.14 | 24 | Matrix Fibroblast |
| Hoxb2       | 0.72 | 0.00 | 0.00 | 0.38 | 0.04 | 24 | Matrix Fibroblast |
| Mdk         | 1.14 | 0.00 | 0.00 | 0.83 | 0.18 | 24 | Matrix Fibroblast |

|               |      |      |      |      |      |    |                   |
|---------------|------|------|------|------|------|----|-------------------|
| Ddr2          | 0.74 | 0.00 | 0.00 | 0.43 | 0.05 | 24 | Matrix Fibroblast |
| Acta2         | 0.88 | 0.00 | 0.00 | 0.85 | 0.19 | 24 | Matrix Fibroblast |
| Ncaph         | 0.71 | 0.00 | 0.00 | 0.38 | 0.04 | 24 | Matrix Fibroblast |
| Gm10184       | 1.07 | 0.00 | 0.00 | 0.46 | 0.06 | 24 | Matrix Fibroblast |
| Igf1          | 1.17 | 0.00 | 0.00 | 0.69 | 0.14 | 24 | Matrix Fibroblast |
| Pdgfrl        | 0.68 | 0.00 | 0.00 | 0.35 | 0.04 | 24 | Matrix Fibroblast |
| Nrcam         | 0.81 | 0.00 | 0.00 | 0.43 | 0.06 | 24 | Matrix Fibroblast |
| Nes           | 1.20 | 0.00 | 0.00 | 0.85 | 0.21 | 24 | Matrix Fibroblast |
| Tpm2          | 0.99 | 0.00 | 0.00 | 0.68 | 0.13 | 24 | Matrix Fibroblast |
| Trim59        | 0.75 | 0.00 | 0.00 | 0.37 | 0.04 | 24 | Matrix Fibroblast |
| Kpna2         | 1.00 | 0.00 | 0.00 | 0.43 | 0.06 | 24 | Matrix Fibroblast |
| Gm10282       | 1.38 | 0.00 | 0.00 | 0.96 | 0.40 | 24 | Matrix Fibroblast |
| Cenpl         | 0.56 | 0.00 | 0.00 | 0.27 | 0.02 | 24 | Matrix Fibroblast |
| Hmgn2         | 1.43 | 0.00 | 0.00 | 0.95 | 0.43 | 24 | Matrix Fibroblast |
| Lgals1        | 1.41 | 0.00 | 0.00 | 0.99 | 0.41 | 24 | Matrix Fibroblast |
| Tyms          | 0.79 | 0.00 | 0.00 | 0.41 | 0.05 | 24 | Matrix Fibroblast |
| H2afz         | 1.38 | 0.00 | 0.00 | 0.94 | 0.40 | 24 | Matrix Fibroblast |
| Loxl2         | 1.06 | 0.00 | 0.00 | 0.67 | 0.14 | 24 | Matrix Fibroblast |
| Rad51ap1      | 0.70 | 0.00 | 0.00 | 0.31 | 0.03 | 24 | Matrix Fibroblast |
| Tnfrsf19      | 0.64 | 0.00 | 0.00 | 0.35 | 0.04 | 24 | Matrix Fibroblast |
| Gmnn          | 0.91 | 0.00 | 0.00 | 0.46 | 0.07 | 24 | Matrix Fibroblast |
| Myh10         | 1.17 | 0.00 | 0.00 | 0.83 | 0.22 | 24 | Matrix Fibroblast |
| Rrm1          | 0.82 | 0.00 | 0.00 | 0.44 | 0.06 | 24 | Matrix Fibroblast |
| Basp1         | 0.75 | 0.00 | 0.00 | 0.42 | 0.06 | 24 | Matrix Fibroblast |
| Hoxb5         | 0.75 | 0.00 | 0.00 | 0.40 | 0.05 | 24 | Matrix Fibroblast |
| Cenpw         | 0.70 | 0.00 | 0.00 | 0.38 | 0.05 | 24 | Matrix Fibroblast |
| Cald1         | 1.21 | 0.00 | 0.00 | 0.97 | 0.41 | 24 | Matrix Fibroblast |
| Smc4          | 1.32 | 0.00 | 0.00 | 0.92 | 0.34 | 24 | Matrix Fibroblast |
| Ncapg2        | 0.71 | 0.00 | 0.00 | 0.29 | 0.03 | 24 | Matrix Fibroblast |
| Ska2          | 0.84 | 0.00 | 0.00 | 0.43 | 0.07 | 24 | Matrix Fibroblast |
| Rnf152        | 0.59 | 0.00 | 0.00 | 0.31 | 0.03 | 24 | Matrix Fibroblast |
| Robo1         | 0.61 | 0.00 | 0.00 | 0.33 | 0.04 | 24 | Matrix Fibroblast |
| 1500009L16Rik | 0.61 | 0.00 | 0.00 | 0.33 | 0.04 | 24 | Matrix Fibroblast |
| Cygb          | 0.69 | 0.00 | 0.00 | 0.40 | 0.06 | 24 | Matrix Fibroblast |
| Igsf10        | 0.62 | 0.00 | 0.00 | 0.33 | 0.04 | 24 | Matrix Fibroblast |
| Fbn2          | 0.71 | 0.00 | 0.00 | 0.39 | 0.05 | 24 | Matrix Fibroblast |
| Gm13889       | 0.74 | 0.00 | 0.00 | 0.43 | 0.07 | 24 | Matrix Fibroblast |
| Stc1          | 0.85 | 0.00 | 0.00 | 0.27 | 0.03 | 24 | Matrix Fibroblast |
| H2afy2        | 0.76 | 0.00 | 0.00 | 0.47 | 0.08 | 24 | Matrix Fibroblast |
| Tcf19         | 0.63 | 0.00 | 0.00 | 0.28 | 0.03 | 24 | Matrix Fibroblast |
| Pdzrn3        | 0.74 | 0.00 | 0.00 | 0.39 | 0.06 | 24 | Matrix Fibroblast |
| D8Ertd82e     | 0.59 | 0.00 | 0.00 | 0.29 | 0.03 | 24 | Matrix Fibroblast |
| Atad2         | 0.96 | 0.00 | 0.00 | 0.47 | 0.08 | 24 | Matrix Fibroblast |

|                |      |      |      |      |      |    |                   |
|----------------|------|------|------|------|------|----|-------------------|
| RP23-103I12.13 | 0.86 | 0.00 | 0.00 | 0.53 | 0.10 | 24 | Matrix Fibroblast |
| 6330403K07Rik  | 0.64 | 0.00 | 0.00 | 0.34 | 0.04 | 24 | Matrix Fibroblast |
| Col5a1         | 0.72 | 0.00 | 0.00 | 0.51 | 0.09 | 24 | Matrix Fibroblast |
| Nucks1         | 1.11 | 0.00 | 0.00 | 0.85 | 0.28 | 24 | Matrix Fibroblast |
| Dkk3           | 0.84 | 0.00 | 0.00 | 0.58 | 0.12 | 24 | Matrix Fibroblast |
| Lmnbl1         | 0.81 | 0.00 | 0.00 | 0.48 | 0.08 | 24 | Matrix Fibroblast |
| Tubb5          | 1.19 | 0.00 | 0.00 | 0.94 | 0.44 | 24 | Matrix Fibroblast |
| 2700094K13Rik  | 0.94 | 0.00 | 0.00 | 0.67 | 0.16 | 24 | Matrix Fibroblast |
| Bora           | 0.61 | 0.00 | 0.00 | 0.28 | 0.03 | 24 | Matrix Fibroblast |
| Nrep           | 1.18 | 0.00 | 0.00 | 0.95 | 0.43 | 24 | Matrix Fibroblast |
| Tmpo           | 1.00 | 0.00 | 0.00 | 0.64 | 0.15 | 24 | Matrix Fibroblast |
| Cdkn2d         | 0.74 | 0.00 | 0.00 | 0.42 | 0.07 | 24 | Matrix Fibroblast |
| Prim1          | 0.74 | 0.00 | 0.00 | 0.36 | 0.05 | 24 | Matrix Fibroblast |
| Cenpq          | 0.78 | 0.00 | 0.00 | 0.41 | 0.07 | 24 | Matrix Fibroblast |
| Gpc4           | 0.52 | 0.00 | 0.00 | 0.32 | 0.04 | 24 | Matrix Fibroblast |
| Ckap5          | 0.94 | 0.00 | 0.00 | 0.54 | 0.11 | 24 | Matrix Fibroblast |
| Tbx5           | 0.70 | 0.00 | 0.00 | 0.45 | 0.08 | 24 | Matrix Fibroblast |
| Col3a1         | 0.73 | 0.00 | 0.00 | 0.96 | 0.33 | 24 | Matrix Fibroblast |
| 4930579G24Rik  | 0.50 | 0.00 | 0.00 | 0.28 | 0.03 | 24 | Matrix Fibroblast |
| Prdx4          | 0.96 | 0.00 | 0.00 | 0.65 | 0.16 | 24 | Matrix Fibroblast |
| Ezh2           | 0.97 | 0.00 | 0.00 | 0.70 | 0.19 | 24 | Matrix Fibroblast |
| Foxf2          | 0.53 | 0.00 | 0.00 | 0.30 | 0.04 | 24 | Matrix Fibroblast |
| C1qtnf2        | 0.62 | 0.00 | 0.00 | 0.30 | 0.04 | 24 | Matrix Fibroblast |
| Tuba1b         | 1.18 | 0.00 | 0.00 | 0.91 | 0.45 | 24 | Matrix Fibroblast |
| Nnat           | 0.84 | 0.00 | 0.00 | 0.44 | 0.08 | 24 | Matrix Fibroblast |
| Tshz2          | 0.77 | 0.00 | 0.00 | 0.49 | 0.09 | 24 | Matrix Fibroblast |
| Phf17          | 0.64 | 0.00 | 0.00 | 0.34 | 0.05 | 24 | Matrix Fibroblast |
| 4632419I22Rik  | 0.76 | 0.00 | 0.00 | 0.43 | 0.08 | 24 | Matrix Fibroblast |
| Ptma           | 0.80 | 0.00 | 0.00 | 1.00 | 0.91 | 24 | Matrix Fibroblast |
| G2e3           | 0.78 | 0.00 | 0.00 | 0.38 | 0.06 | 24 | Matrix Fibroblast |
| Dbf4           | 0.69 | 0.00 | 0.00 | 0.34 | 0.05 | 24 | Matrix Fibroblast |
| Uhrf1          | 0.51 | 0.00 | 0.00 | 0.25 | 0.03 | 24 | Matrix Fibroblast |
| Dnajc9         | 0.80 | 0.00 | 0.00 | 0.54 | 0.12 | 24 | Matrix Fibroblast |
| Leprel2        | 0.66 | 0.00 | 0.00 | 0.41 | 0.07 | 24 | Matrix Fibroblast |
| Rad21          | 0.99 | 0.00 | 0.00 | 0.75 | 0.23 | 24 | Matrix Fibroblast |
| Tmem132c       | 0.65 | 0.00 | 0.00 | 0.34 | 0.05 | 24 | Matrix Fibroblast |
| Nasp           | 1.00 | 0.00 | 0.00 | 0.68 | 0.20 | 24 | Matrix Fibroblast |
| Gm6104         | 0.73 | 0.00 | 0.00 | 0.55 | 0.12 | 24 | Matrix Fibroblast |
| Filip1l        | 0.99 | 0.00 | 0.00 | 0.87 | 0.33 | 24 | Matrix Fibroblast |
| Ckb            | 0.75 | 0.00 | 0.00 | 0.60 | 0.14 | 24 | Matrix Fibroblast |
| Calm2          | 1.01 | 0.00 | 0.00 | 0.99 | 0.64 | 24 | Matrix Fibroblast |
| Fbn1           | 0.77 | 0.00 | 0.00 | 0.67 | 0.17 | 24 | Matrix Fibroblast |
| Oxct1          | 0.85 | 0.00 | 0.00 | 0.59 | 0.15 | 24 | Matrix Fibroblast |

|          |      |      |      |      |      |    |                   |
|----------|------|------|------|------|------|----|-------------------|
| Actg2    | 0.63 | 0.00 | 0.00 | 0.42 | 0.07 | 24 | Matrix Fibroblast |
| Anp32e   | 1.01 | 0.00 | 0.00 | 0.81 | 0.28 | 24 | Matrix Fibroblast |
| Hmgb3    | 0.81 | 0.00 | 0.00 | 0.58 | 0.14 | 24 | Matrix Fibroblast |
| Tgfb2    | 0.84 | 0.00 | 0.00 | 0.58 | 0.14 | 24 | Matrix Fibroblast |
| Smtn     | 0.70 | 0.00 | 0.00 | 0.42 | 0.08 | 24 | Matrix Fibroblast |
| Des      | 0.54 | 0.00 | 0.00 | 0.35 | 0.06 | 24 | Matrix Fibroblast |
| 10-Sep   | 0.71 | 0.00 | 0.00 | 0.45 | 0.09 | 24 | Matrix Fibroblast |
| Lig1     | 0.84 | 0.00 | 0.00 | 0.46 | 0.09 | 24 | Matrix Fibroblast |
| Enc1     | 0.52 | 0.00 | 0.00 | 0.27 | 0.04 | 24 | Matrix Fibroblast |
| Tagln    | 0.64 | 0.00 | 0.00 | 0.61 | 0.15 | 24 | Matrix Fibroblast |
| Rangap1  | 0.66 | 0.00 | 0.00 | 0.41 | 0.08 | 24 | Matrix Fibroblast |
| H2afv    | 0.99 | 0.00 | 0.00 | 0.76 | 0.28 | 24 | Matrix Fibroblast |
| Mylk     | 0.76 | 0.00 | 0.00 | 0.82 | 0.27 | 24 | Matrix Fibroblast |
| Tuba1a   | 0.98 | 0.00 | 0.00 | 0.91 | 0.51 | 24 | Matrix Fibroblast |
| Lhfp12   | 0.62 | 0.00 | 0.00 | 0.42 | 0.09 | 24 | Matrix Fibroblast |
| Cmc2     | 0.57 | 0.00 | 0.00 | 0.31 | 0.05 | 24 | Matrix Fibroblast |
| Fstl1    | 0.79 | 0.00 | 0.00 | 0.95 | 0.44 | 24 | Matrix Fibroblast |
| Dut      | 0.77 | 0.00 | 0.00 | 0.42 | 0.09 | 24 | Matrix Fibroblast |
| Pmf1     | 0.44 | 0.00 | 0.00 | 0.28 | 0.04 | 24 | Matrix Fibroblast |
| Col1a2   | 0.54 | 0.00 | 0.00 | 0.99 | 0.39 | 24 | Matrix Fibroblast |
| Rarres2  | 0.65 | 0.00 | 0.00 | 0.54 | 0.13 | 24 | Matrix Fibroblast |
| Mex3a    | 0.63 | 0.00 | 0.00 | 0.41 | 0.08 | 24 | Matrix Fibroblast |
| Ran      | 0.94 | 0.00 | 0.00 | 0.85 | 0.38 | 24 | Matrix Fibroblast |
| Cdk5rap2 | 0.60 | 0.00 | 0.00 | 0.43 | 0.09 | 24 | Matrix Fibroblast |
| Cdh11    | 0.58 | 0.00 | 0.00 | 0.68 | 0.19 | 24 | Matrix Fibroblast |
| Mis18a   | 0.46 | 0.00 | 0.00 | 0.28 | 0.04 | 24 | Matrix Fibroblast |
| Mis12    | 0.64 | 0.00 | 0.00 | 0.36 | 0.07 | 24 | Matrix Fibroblast |
| Rfc4     | 0.50 | 0.00 | 0.00 | 0.25 | 0.04 | 24 | Matrix Fibroblast |
| Prr5l    | 0.58 | 0.00 | 0.00 | 0.35 | 0.06 | 24 | Matrix Fibroblast |
| Pola1    | 0.55 | 0.00 | 0.00 | 0.28 | 0.04 | 24 | Matrix Fibroblast |
| Plac9a   | 0.59 | 0.00 | 0.00 | 0.88 | 0.30 | 24 | Matrix Fibroblast |
| Myl9     | 0.61 | 0.00 | 0.00 | 0.50 | 0.12 | 24 | Matrix Fibroblast |
| Gpr126   | 0.60 | 0.00 | 0.00 | 0.46 | 0.10 | 24 | Matrix Fibroblast |
| Hmgb1    | 0.85 | 0.00 | 0.00 | 0.94 | 0.61 | 24 | Matrix Fibroblast |
| Bgn      | 0.65 | 0.00 | 0.00 | 0.75 | 0.24 | 24 | Matrix Fibroblast |
| Tbx4     | 0.58 | 0.00 | 0.00 | 0.35 | 0.07 | 24 | Matrix Fibroblast |
| Nfib     | 0.87 | 0.00 | 0.00 | 0.92 | 0.47 | 24 | Matrix Fibroblast |
| Lhfp     | 0.55 | 0.00 | 0.00 | 0.58 | 0.15 | 24 | Matrix Fibroblast |
| Psip1    | 0.76 | 0.00 | 0.00 | 0.54 | 0.15 | 24 | Matrix Fibroblast |
| Tgfb3    | 0.52 | 0.00 | 0.00 | 0.31 | 0.05 | 24 | Matrix Fibroblast |
| Kcnk3    | 0.43 | 0.00 | 0.00 | 0.29 | 0.05 | 24 | Matrix Fibroblast |
| Tipin    | 0.72 | 0.00 | 0.00 | 0.43 | 0.10 | 24 | Matrix Fibroblast |
| Plac9b   | 0.56 | 0.00 | 0.00 | 0.86 | 0.30 | 24 | Matrix Fibroblast |

|          |      |      |      |      |      |    |                   |
|----------|------|------|------|------|------|----|-------------------|
| Tshz1    | 0.77 | 0.00 | 0.00 | 0.47 | 0.12 | 24 | Matrix Fibroblast |
| Cit      | 0.52 | 0.00 | 0.00 | 0.27 | 0.05 | 24 | Matrix Fibroblast |
| Tuba1c   | 0.92 | 0.00 | 0.00 | 0.78 | 0.32 | 24 | Matrix Fibroblast |
| Lmna     | 0.81 | 0.00 | 0.00 | 0.64 | 0.20 | 24 | Matrix Fibroblast |
| Gpr64    | 0.51 | 0.00 | 0.00 | 0.29 | 0.05 | 24 | Matrix Fibroblast |
| Pcna     | 0.96 | 0.00 | 0.00 | 0.57 | 0.18 | 24 | Matrix Fibroblast |
| Nrm      | 0.53 | 0.00 | 0.00 | 0.30 | 0.05 | 24 | Matrix Fibroblast |
| Efemp2   | 0.52 | 0.00 | 0.00 | 0.35 | 0.07 | 24 | Matrix Fibroblast |
| Hist1h1e | 1.03 | 0.00 | 0.00 | 0.55 | 0.16 | 24 | Matrix Fibroblast |
| Cbx3     | 0.80 | 0.00 | 0.00 | 0.83 | 0.34 | 24 | Matrix Fibroblast |
| Ncapd3   | 0.56 | 0.00 | 0.00 | 0.31 | 0.06 | 24 | Matrix Fibroblast |
| Golim4   | 0.77 | 0.00 | 0.00 | 0.63 | 0.20 | 24 | Matrix Fibroblast |
| Snai2    | 0.58 | 0.00 | 0.00 | 0.48 | 0.12 | 24 | Matrix Fibroblast |
| Serpine2 | 0.71 | 0.00 | 0.00 | 0.74 | 0.25 | 24 | Matrix Fibroblast |
| Calu     | 0.71 | 0.00 | 0.00 | 0.70 | 0.24 | 24 | Matrix Fibroblast |
| Grb10    | 0.68 | 0.00 | 0.00 | 0.56 | 0.16 | 24 | Matrix Fibroblast |
| Larp7    | 0.75 | 0.00 | 0.00 | 0.57 | 0.17 | 24 | Matrix Fibroblast |
| Col16a1  | 0.55 | 0.00 | 0.00 | 0.30 | 0.06 | 24 | Matrix Fibroblast |
| Angptl2  | 0.44 | 0.00 | 0.00 | 0.26 | 0.04 | 24 | Matrix Fibroblast |
| Pcna-ps2 | 0.92 | 0.00 | 0.00 | 0.57 | 0.18 | 24 | Matrix Fibroblast |
| Cenpc1   | 0.69 | 0.00 | 0.00 | 0.38 | 0.09 | 24 | Matrix Fibroblast |
| Whsc1    | 0.66 | 0.00 | 0.00 | 0.50 | 0.14 | 24 | Matrix Fibroblast |
| Ranbp1   | 0.84 | 0.00 | 0.00 | 0.73 | 0.29 | 24 | Matrix Fibroblast |
| Cd34     | 0.58 | 0.00 | 0.00 | 0.64 | 0.20 | 24 | Matrix Fibroblast |
| Palld    | 0.65 | 0.00 | 0.00 | 0.58 | 0.17 | 24 | Matrix Fibroblast |
| Rbms3    | 0.64 | 0.00 | 0.00 | 0.57 | 0.17 | 24 | Matrix Fibroblast |
| Ism1     | 0.49 | 0.00 | 0.00 | 0.39 | 0.09 | 24 | Matrix Fibroblast |
| Fzd1     | 0.44 | 0.00 | 0.00 | 0.29 | 0.06 | 24 | Matrix Fibroblast |
| Usp1     | 0.65 | 0.00 | 0.00 | 0.53 | 0.15 | 24 | Matrix Fibroblast |
| Banf1    | 0.71 | 0.00 | 0.00 | 0.73 | 0.28 | 24 | Matrix Fibroblast |
| B3galtl  | 0.56 | 0.00 | 0.00 | 0.31 | 0.06 | 24 | Matrix Fibroblast |
| Dtymk    | 0.65 | 0.00 | 0.00 | 0.48 | 0.13 | 24 | Matrix Fibroblast |
| Nexn     | 0.67 | 0.00 | 0.00 | 0.66 | 0.22 | 24 | Matrix Fibroblast |
| Zeb2     | 0.72 | 0.00 | 0.00 | 0.79 | 0.31 | 24 | Matrix Fibroblast |
| Egflam   | 0.54 | 0.00 | 0.00 | 0.36 | 0.08 | 24 | Matrix Fibroblast |
| Gm10068  | 0.75 | 0.00 | 0.00 | 0.75 | 0.30 | 24 | Matrix Fibroblast |
| Rasl11b  | 0.41 | 0.00 | 0.00 | 0.28 | 0.05 | 24 | Matrix Fibroblast |
| Ckap4    | 0.72 | 0.00 | 0.00 | 0.56 | 0.18 | 24 | Matrix Fibroblast |
| Tubb4b   | 0.75 | 0.00 | 0.00 | 0.57 | 0.19 | 24 | Matrix Fibroblast |
| Tpm1     | 0.74 | 0.00 | 0.00 | 0.92 | 0.52 | 24 | Matrix Fibroblast |
| H19      | 0.35 | 0.00 | 0.00 | 0.34 | 0.07 | 24 | Matrix Fibroblast |
| Klhl23   | 0.42 | 0.00 | 0.00 | 0.28 | 0.05 | 24 | Matrix Fibroblast |
| Rfc3     | 0.58 | 0.00 | 0.00 | 0.37 | 0.09 | 24 | Matrix Fibroblast |

|               |      |      |      |      |      |    |                   |
|---------------|------|------|------|------|------|----|-------------------|
| Rnaseh2b      | 0.52 | 0.00 | 0.00 | 0.35 | 0.08 | 24 | Matrix Fibroblast |
| Cbx5          | 0.71 | 0.00 | 0.00 | 0.69 | 0.26 | 24 | Matrix Fibroblast |
| Gm9847        | 0.59 | 0.00 | 0.00 | 0.53 | 0.16 | 24 | Matrix Fibroblast |
| Iigp1         | 0.49 | 0.00 | 0.00 | 0.48 | 0.13 | 24 | Matrix Fibroblast |
| Net1          | 0.62 | 0.00 | 0.00 | 0.55 | 0.17 | 24 | Matrix Fibroblast |
| Smc1a         | 0.77 | 0.00 | 0.00 | 0.78 | 0.35 | 24 | Matrix Fibroblast |
| Cpq           | 0.45 | 0.00 | 0.00 | 0.37 | 0.08 | 24 | Matrix Fibroblast |
| Nfix          | 0.63 | 0.00 | 0.00 | 0.54 | 0.17 | 24 | Matrix Fibroblast |
| Rcn3          | 0.52 | 0.00 | 0.00 | 0.47 | 0.13 | 24 | Matrix Fibroblast |
| Qpct          | 0.38 | 0.00 | 0.00 | 0.25 | 0.05 | 24 | Matrix Fibroblast |
| Nde1          | 0.49 | 0.00 | 0.00 | 0.30 | 0.06 | 24 | Matrix Fibroblast |
| Gpm6b         | 0.51 | 0.00 | 0.00 | 0.42 | 0.11 | 24 | Matrix Fibroblast |
| Pros1         | 0.47 | 0.00 | 0.00 | 0.40 | 0.10 | 24 | Matrix Fibroblast |
| Dek           | 0.81 | 0.00 | 0.00 | 0.88 | 0.50 | 24 | Matrix Fibroblast |
| Sept11        | 0.65 | 0.00 | 0.00 | 0.63 | 0.22 | 24 | Matrix Fibroblast |
| Socs2         | 0.64 | 0.00 | 0.00 | 0.80 | 0.34 | 24 | Matrix Fibroblast |
| Hist1h1d      | 0.83 | 0.00 | 0.00 | 0.38 | 0.10 | 24 | Matrix Fibroblast |
| Tbx2          | 0.47 | 0.00 | 0.00 | 0.44 | 0.12 | 24 | Matrix Fibroblast |
| Snrpd1        | 0.65 | 0.00 | 0.00 | 0.58 | 0.20 | 24 | Matrix Fibroblast |
| Cdk4          | 0.69 | 0.00 | 0.00 | 0.64 | 0.24 | 24 | Matrix Fibroblast |
| Lamb1         | 0.48 | 0.00 | 0.00 | 0.53 | 0.16 | 24 | Matrix Fibroblast |
| 1700025G04Rik | 0.53 | 0.00 | 0.00 | 0.39 | 0.10 | 24 | Matrix Fibroblast |
| Asph          | 0.45 | 0.00 | 0.00 | 0.29 | 0.06 | 24 | Matrix Fibroblast |
| Dnmt1         | 0.52 | 0.00 | 0.00 | 0.40 | 0.10 | 24 | Matrix Fibroblast |
| Rpn2          | 0.66 | 0.00 | 0.00 | 0.59 | 0.21 | 24 | Matrix Fibroblast |
| Actn1         | 0.69 | 0.00 | 0.00 | 0.61 | 0.23 | 24 | Matrix Fibroblast |
| Hsp90b1       | 0.62 | 0.00 | 0.00 | 0.98 | 0.76 | 24 | Matrix Fibroblast |
| Hist2h2ac     | 0.51 | 0.00 | 0.00 | 0.29 | 0.06 | 24 | Matrix Fibroblast |
| Aebp1         | 0.45 | 0.00 | 0.00 | 0.33 | 0.08 | 24 | Matrix Fibroblast |
| Map1b         | 0.57 | 0.00 | 0.00 | 0.39 | 0.10 | 24 | Matrix Fibroblast |
| Cntln         | 0.65 | 0.00 | 0.00 | 0.42 | 0.12 | 24 | Matrix Fibroblast |
| Cdca7         | 0.48 | 0.00 | 0.00 | 0.27 | 0.06 | 24 | Matrix Fibroblast |
| Med30         | 0.53 | 0.00 | 0.00 | 0.35 | 0.09 | 24 | Matrix Fibroblast |
| Bub3          | 0.61 | 0.00 | 0.00 | 0.46 | 0.14 | 24 | Matrix Fibroblast |
| 5830418K08Rik | 0.61 | 0.00 | 0.00 | 0.35 | 0.09 | 24 | Matrix Fibroblast |
| Cd44          | 0.46 | 0.00 | 0.00 | 0.60 | 0.20 | 24 | Matrix Fibroblast |
| Hnrnpa2b1     | 0.61 | 0.00 | 0.00 | 0.95 | 0.72 | 24 | Matrix Fibroblast |
| Sae1          | 0.47 | 0.00 | 0.00 | 0.40 | 0.11 | 24 | Matrix Fibroblast |
| Col1a1        | 0.30 | 0.00 | 0.00 | 0.71 | 0.26 | 24 | Matrix Fibroblast |
| Cdca4         | 0.36 | 0.00 | 0.00 | 0.25 | 0.05 | 24 | Matrix Fibroblast |
| Tpm4          | 0.66 | 0.00 | 0.00 | 0.87 | 0.49 | 24 | Matrix Fibroblast |
| Haus8         | 0.46 | 0.00 | 0.00 | 0.25 | 0.05 | 24 | Matrix Fibroblast |
| Hmgn1         | 0.67 | 0.00 | 0.00 | 0.85 | 0.45 | 24 | Matrix Fibroblast |

|            |      |      |      |      |      |    |                   |
|------------|------|------|------|------|------|----|-------------------|
| Mcm7       | 0.48 | 0.00 | 0.00 | 0.31 | 0.07 | 24 | Matrix Fibroblast |
| Hells      | 0.44 | 0.00 | 0.00 | 0.27 | 0.06 | 24 | Matrix Fibroblast |
| Hn1        | 0.70 | 0.00 | 0.00 | 0.55 | 0.20 | 24 | Matrix Fibroblast |
| Mfap2      | 0.55 | 0.00 | 0.00 | 0.82 | 0.35 | 24 | Matrix Fibroblast |
| Rgs2       | 0.46 | 0.00 | 0.00 | 0.71 | 0.28 | 24 | Matrix Fibroblast |
| Creb3l2    | 0.54 | 0.00 | 0.00 | 0.45 | 0.13 | 24 | Matrix Fibroblast |
| Thbs1      | 0.51 | 0.00 | 0.00 | 0.44 | 0.13 | 24 | Matrix Fibroblast |
| Lsp1       | 0.68 | 0.00 | 0.00 | 0.56 | 0.19 | 24 | Matrix Fibroblast |
| Rpa3       | 0.57 | 0.00 | 0.00 | 0.43 | 0.13 | 24 | Matrix Fibroblast |
| Cep112     | 0.41 | 0.00 | 0.00 | 0.26 | 0.05 | 24 | Matrix Fibroblast |
| Myef2      | 0.56 | 0.00 | 0.00 | 0.49 | 0.16 | 24 | Matrix Fibroblast |
| Fut8       | 0.36 | 0.00 | 0.00 | 0.26 | 0.06 | 24 | Matrix Fibroblast |
| Mapre2     | 0.55 | 0.00 | 0.00 | 0.39 | 0.11 | 24 | Matrix Fibroblast |
| Prdm6      | 0.38 | 0.00 | 0.00 | 0.29 | 0.07 | 24 | Matrix Fibroblast |
| Papss1     | 0.37 | 0.00 | 0.00 | 0.30 | 0.07 | 24 | Matrix Fibroblast |
| Pdlim7     | 0.40 | 0.00 | 0.00 | 0.38 | 0.10 | 24 | Matrix Fibroblast |
| H3f3b      | 0.53 | 0.00 | 0.00 | 0.99 | 0.89 | 24 | Matrix Fibroblast |
| Atad5      | 0.56 | 0.00 | 0.00 | 0.25 | 0.05 | 24 | Matrix Fibroblast |
| Lsm3       | 0.47 | 0.00 | 0.00 | 0.39 | 0.11 | 24 | Matrix Fibroblast |
| Mgp        | 0.48 | 0.00 | 0.00 | 0.77 | 0.32 | 24 | Matrix Fibroblast |
| Mcm4       | 0.39 | 0.00 | 0.00 | 0.26 | 0.06 | 24 | Matrix Fibroblast |
| Atpif1     | 0.64 | 0.00 | 0.00 | 0.90 | 0.53 | 24 | Matrix Fibroblast |
| Pxdn       | 0.41 | 0.00 | 0.00 | 0.39 | 0.11 | 24 | Matrix Fibroblast |
| Hoxb4      | 0.41 | 0.00 | 0.00 | 0.29 | 0.07 | 24 | Matrix Fibroblast |
| Gm10123    | 0.54 | 0.00 | 0.00 | 0.96 | 0.81 | 24 | Matrix Fibroblast |
| Itga9      | 0.48 | 0.00 | 0.00 | 0.36 | 0.09 | 24 | Matrix Fibroblast |
| Smc6       | 0.58 | 0.00 | 0.00 | 0.76 | 0.33 | 24 | Matrix Fibroblast |
| Slbp       | 0.64 | 0.00 | 0.00 | 0.46 | 0.15 | 24 | Matrix Fibroblast |
| Cbx1       | 0.61 | 0.00 | 0.00 | 0.83 | 0.41 | 24 | Matrix Fibroblast |
| Gm9833     | 0.48 | 0.00 | 0.00 | 0.39 | 0.11 | 24 | Matrix Fibroblast |
| Rbbp7      | 0.67 | 0.00 | 0.00 | 0.63 | 0.26 | 24 | Matrix Fibroblast |
| Ccdc88a    | 0.55 | 0.00 | 0.00 | 0.64 | 0.24 | 24 | Matrix Fibroblast |
| Dnajc10    | 0.52 | 0.00 | 0.00 | 0.47 | 0.15 | 24 | Matrix Fibroblast |
| Nudcd2     | 0.50 | 0.00 | 0.00 | 0.37 | 0.10 | 24 | Matrix Fibroblast |
| Tubb4b-ps1 | 0.48 | 0.00 | 0.00 | 0.33 | 0.09 | 24 | Matrix Fibroblast |
| Adk        | 0.46 | 0.00 | 0.00 | 0.40 | 0.12 | 24 | Matrix Fibroblast |
| Bmp4       | 0.45 | 0.00 | 0.00 | 0.37 | 0.10 | 24 | Matrix Fibroblast |
| Rnaseh2c   | 0.48 | 0.00 | 0.00 | 0.37 | 0.11 | 24 | Matrix Fibroblast |
| Serf1      | 0.56 | 0.00 | 0.00 | 0.38 | 0.11 | 24 | Matrix Fibroblast |
| Serpinh1   | 0.55 | 0.00 | 0.00 | 0.82 | 0.39 | 24 | Matrix Fibroblast |
| Rcn2       | 0.49 | 0.00 | 0.00 | 0.46 | 0.15 | 24 | Matrix Fibroblast |
| Ppia       | 0.53 | 0.00 | 0.00 | 0.95 | 0.80 | 24 | Matrix Fibroblast |
| Col6a3     | 0.43 | 0.00 | 0.00 | 0.35 | 0.10 | 24 | Matrix Fibroblast |

|            |      |      |      |      |      |    |                   |
|------------|------|------|------|------|------|----|-------------------|
| Gm6625     | 0.61 | 0.00 | 0.00 | 0.63 | 0.25 | 24 | Matrix Fibroblast |
| Mrpl51     | 0.52 | 0.00 | 0.00 | 0.47 | 0.16 | 24 | Matrix Fibroblast |
| Ssrp1      | 0.59 | 0.00 | 0.00 | 0.56 | 0.21 | 24 | Matrix Fibroblast |
| Hsp90aa1   | 0.52 | 0.00 | 0.00 | 0.85 | 0.47 | 24 | Matrix Fibroblast |
| Kpnb1      | 0.50 | 0.00 | 0.00 | 0.53 | 0.19 | 24 | Matrix Fibroblast |
| Pknox1     | 0.42 | 0.00 | 0.00 | 0.28 | 0.07 | 24 | Matrix Fibroblast |
| Mpdz       | 0.43 | 0.00 | 0.00 | 0.30 | 0.08 | 24 | Matrix Fibroblast |
| Mpzl1      | 0.45 | 0.00 | 0.00 | 0.38 | 0.11 | 24 | Matrix Fibroblast |
| Adamts10   | 0.47 | 0.00 | 0.00 | 0.39 | 0.11 | 24 | Matrix Fibroblast |
| Gjc1       | 0.43 | 0.00 | 0.00 | 0.30 | 0.08 | 24 | Matrix Fibroblast |
| Pam        | 0.49 | 0.00 | 0.00 | 0.50 | 0.17 | 24 | Matrix Fibroblast |
| Stub1      | 0.47 | 0.00 | 0.00 | 0.58 | 0.22 | 24 | Matrix Fibroblast |
| Samd4      | 0.45 | 0.00 | 0.00 | 0.32 | 0.09 | 24 | Matrix Fibroblast |
| Gnb4       | 0.51 | 0.00 | 0.00 | 0.41 | 0.13 | 24 | Matrix Fibroblast |
| Nptn       | 0.51 | 0.00 | 0.00 | 0.56 | 0.21 | 24 | Matrix Fibroblast |
| Smarcc1    | 0.49 | 0.00 | 0.00 | 0.47 | 0.17 | 24 | Matrix Fibroblast |
| Terf1      | 0.41 | 0.00 | 0.00 | 0.25 | 0.06 | 24 | Matrix Fibroblast |
| Ryk        | 0.45 | 0.00 | 0.00 | 0.41 | 0.13 | 24 | Matrix Fibroblast |
| Gpx7       | 0.47 | 0.00 | 0.00 | 0.34 | 0.10 | 24 | Matrix Fibroblast |
| Vdac1      | 0.51 | 0.00 | 0.00 | 0.54 | 0.21 | 24 | Matrix Fibroblast |
| Ncald      | 0.46 | 0.00 | 0.00 | 0.34 | 0.10 | 24 | Matrix Fibroblast |
| Erh        | 0.61 | 0.00 | 0.00 | 0.65 | 0.28 | 24 | Matrix Fibroblast |
| Cep290     | 0.52 | 0.00 | 0.00 | 0.34 | 0.10 | 24 | Matrix Fibroblast |
| Brd8       | 0.54 | 0.00 | 0.00 | 0.52 | 0.19 | 24 | Matrix Fibroblast |
| Rbbp4      | 0.54 | 0.00 | 0.00 | 0.53 | 0.20 | 24 | Matrix Fibroblast |
| Ptms       | 0.69 | 0.00 | 0.00 | 0.77 | 0.40 | 24 | Matrix Fibroblast |
| Acat1      | 0.55 | 0.00 | 0.00 | 0.49 | 0.18 | 24 | Matrix Fibroblast |
| Plxna2     | 0.42 | 0.00 | 0.00 | 0.29 | 0.07 | 24 | Matrix Fibroblast |
| Igfbp5     | 0.44 | 0.00 | 0.00 | 0.36 | 0.11 | 24 | Matrix Fibroblast |
| Cep57      | 0.47 | 0.00 | 0.00 | 0.36 | 0.11 | 24 | Matrix Fibroblast |
| Selm       | 0.34 | 0.00 | 0.00 | 0.32 | 0.09 | 24 | Matrix Fibroblast |
| Lsm2       | 0.40 | 0.00 | 0.00 | 0.32 | 0.09 | 24 | Matrix Fibroblast |
| Pbdc1      | 0.42 | 0.00 | 0.00 | 0.40 | 0.13 | 24 | Matrix Fibroblast |
| MLlt3      | 0.46 | 0.00 | 0.00 | 0.37 | 0.11 | 24 | Matrix Fibroblast |
| Ccdc41     | 0.46 | 0.00 | 0.00 | 0.48 | 0.17 | 24 | Matrix Fibroblast |
| Lcorl      | 0.37 | 0.00 | 0.00 | 0.28 | 0.07 | 24 | Matrix Fibroblast |
| Ddah2      | 0.49 | 0.00 | 0.00 | 0.64 | 0.26 | 24 | Matrix Fibroblast |
| Hist2h2aa2 | 0.56 | 0.00 | 0.00 | 0.41 | 0.14 | 24 | Matrix Fibroblast |
| Srsf3      | 0.56 | 0.00 | 0.00 | 0.83 | 0.44 | 24 | Matrix Fibroblast |
| Lama4      | 0.40 | 0.00 | 0.00 | 0.41 | 0.13 | 24 | Matrix Fibroblast |
| Sgce       | 0.45 | 0.00 | 0.00 | 0.34 | 0.10 | 24 | Matrix Fibroblast |
| Xpo1       | 0.39 | 0.00 | 0.00 | 0.33 | 0.10 | 24 | Matrix Fibroblast |
| Fam111a    | 0.42 | 0.00 | 0.00 | 0.45 | 0.15 | 24 | Matrix Fibroblast |

|               |      |      |      |      |      |    |                   |
|---------------|------|------|------|------|------|----|-------------------|
| Anp32b        | 0.58 | 0.00 | 0.00 | 0.84 | 0.50 | 24 | Matrix Fibroblast |
| Spry1         | 0.38 | 0.00 | 0.00 | 0.27 | 0.07 | 24 | Matrix Fibroblast |
| Baz1b         | 0.56 | 0.00 | 0.00 | 0.61 | 0.26 | 24 | Matrix Fibroblast |
| Snhg5         | 0.48 | 0.00 | 0.00 | 0.48 | 0.18 | 24 | Matrix Fibroblast |
| Adamts2       | 0.48 | 0.00 | 0.00 | 0.35 | 0.10 | 24 | Matrix Fibroblast |
| Tnfaip8       | 0.41 | 0.00 | 0.00 | 0.35 | 0.10 | 24 | Matrix Fibroblast |
| Tspan3        | 0.41 | 0.00 | 0.00 | 0.45 | 0.16 | 24 | Matrix Fibroblast |
| Gng12         | 0.44 | 0.00 | 0.00 | 0.38 | 0.12 | 24 | Matrix Fibroblast |
| Ilk           | 0.49 | 0.00 | 0.00 | 0.56 | 0.23 | 24 | Matrix Fibroblast |
| Nr2f2         | 0.39 | 0.00 | 0.00 | 0.55 | 0.21 | 24 | Matrix Fibroblast |
| Naa50         | 0.40 | 0.00 | 0.00 | 0.40 | 0.13 | 24 | Matrix Fibroblast |
| Cgrrf1        | 0.36 | 0.00 | 0.00 | 0.30 | 0.08 | 24 | Matrix Fibroblast |
| Pa2g4         | 0.51 | 0.00 | 0.00 | 0.61 | 0.26 | 24 | Matrix Fibroblast |
| Ptprs         | 0.36 | 0.00 | 0.00 | 0.29 | 0.08 | 24 | Matrix Fibroblast |
| Ilf3          | 0.49 | 0.00 | 0.00 | 0.37 | 0.12 | 24 | Matrix Fibroblast |
| Celf2         | 0.44 | 0.00 | 0.00 | 0.65 | 0.28 | 24 | Matrix Fibroblast |
| Nop58         | 0.52 | 0.00 | 0.00 | 0.60 | 0.26 | 24 | Matrix Fibroblast |
| Ilf2          | 0.47 | 0.00 | 0.00 | 0.50 | 0.19 | 24 | Matrix Fibroblast |
| Prkrir        | 0.36 | 0.00 | 0.00 | 0.34 | 0.11 | 24 | Matrix Fibroblast |
| 2700029M09Rik | 0.42 | 0.00 | 0.00 | 0.38 | 0.13 | 24 | Matrix Fibroblast |
| Gtf2a2        | 0.45 | 0.00 | 0.00 | 0.49 | 0.19 | 24 | Matrix Fibroblast |
| Fkbp10        | 0.30 | 0.00 | 0.00 | 0.28 | 0.08 | 24 | Matrix Fibroblast |
| Syncrip       | 0.50 | 0.00 | 0.00 | 0.58 | 0.25 | 24 | Matrix Fibroblast |
| Supt16        | 0.53 | 0.00 | 0.00 | 0.58 | 0.25 | 24 | Matrix Fibroblast |
| Ghr           | 0.35 | 0.00 | 0.00 | 0.43 | 0.15 | 24 | Matrix Fibroblast |
| Nsmce1        | 0.38 | 0.00 | 0.00 | 0.40 | 0.14 | 24 | Matrix Fibroblast |
| Zadh2         | 0.37 | 0.00 | 0.00 | 0.29 | 0.08 | 24 | Matrix Fibroblast |
| Gm6793        | 0.55 | 0.00 | 0.00 | 0.64 | 0.30 | 24 | Matrix Fibroblast |
| Ikbip         | 0.43 | 0.00 | 0.00 | 0.28 | 0.08 | 24 | Matrix Fibroblast |
| Mustn1        | 0.36 | 0.00 | 0.00 | 0.28 | 0.08 | 24 | Matrix Fibroblast |
| Ddx1          | 0.46 | 0.00 | 0.00 | 0.45 | 0.17 | 24 | Matrix Fibroblast |
| Exosc8        | 0.31 | 0.00 | 0.00 | 0.29 | 0.08 | 24 | Matrix Fibroblast |
| Cnn3          | 0.46 | 0.00 | 0.00 | 0.67 | 0.30 | 24 | Matrix Fibroblast |
| Srsf7         | 0.41 | 0.00 | 0.00 | 0.43 | 0.16 | 24 | Matrix Fibroblast |
| Eif4e         | 0.37 | 0.00 | 0.00 | 0.33 | 0.10 | 24 | Matrix Fibroblast |
| Minos1        | 0.55 | 0.00 | 0.00 | 0.78 | 0.44 | 24 | Matrix Fibroblast |
| Csrp2         | 0.35 | 0.00 | 0.00 | 0.46 | 0.17 | 24 | Matrix Fibroblast |
| Rab13         | 0.34 | 0.00 | 0.00 | 0.31 | 0.09 | 24 | Matrix Fibroblast |
| Hnrnpr        | 0.48 | 0.00 | 0.00 | 0.57 | 0.25 | 24 | Matrix Fibroblast |
| Uchl5         | 0.36 | 0.00 | 0.00 | 0.35 | 0.12 | 24 | Matrix Fibroblast |
| Tead2         | 0.39 | 0.00 | 0.00 | 0.38 | 0.13 | 24 | Matrix Fibroblast |
| Hnrnpab       | 0.55 | 0.00 | 0.00 | 0.67 | 0.33 | 24 | Matrix Fibroblast |
| Fip111        | 0.46 | 0.00 | 0.00 | 0.47 | 0.18 | 24 | Matrix Fibroblast |

|               |      |      |      |      |      |    |                   |
|---------------|------|------|------|------|------|----|-------------------|
| Pmepa1        | 0.36 | 0.00 | 0.00 | 0.34 | 0.11 | 24 | Matrix Fibroblast |
| Slc39a6       | 0.32 | 0.00 | 0.00 | 0.27 | 0.07 | 24 | Matrix Fibroblast |
| Rcn1          | 0.38 | 0.00 | 0.00 | 0.40 | 0.14 | 24 | Matrix Fibroblast |
| Nbl1          | 0.37 | 0.00 | 0.00 | 0.25 | 0.07 | 24 | Matrix Fibroblast |
| Cgnl1         | 0.34 | 0.00 | 0.00 | 0.36 | 0.12 | 24 | Matrix Fibroblast |
| Hnrnpa1       | 0.49 | 0.00 | 0.00 | 0.59 | 0.27 | 24 | Matrix Fibroblast |
| Nfic          | 0.48 | 0.00 | 0.00 | 0.56 | 0.24 | 24 | Matrix Fibroblast |
| Nono          | 0.45 | 0.00 | 0.00 | 0.51 | 0.21 | 24 | Matrix Fibroblast |
| Ndufaf2       | 0.49 | 0.00 | 0.00 | 0.36 | 0.12 | 24 | Matrix Fibroblast |
| Thoc7         | 0.48 | 0.00 | 0.00 | 0.67 | 0.32 | 24 | Matrix Fibroblast |
| Col5a2        | 0.31 | 0.00 | 0.00 | 0.48 | 0.18 | 24 | Matrix Fibroblast |
| Ppic          | 0.47 | 0.00 | 0.00 | 0.76 | 0.38 | 24 | Matrix Fibroblast |
| Rbbp8         | 0.43 | 0.00 | 0.00 | 0.29 | 0.09 | 24 | Matrix Fibroblast |
| P4hb          | 0.47 | 0.00 | 0.00 | 0.76 | 0.40 | 24 | Matrix Fibroblast |
| Nfia          | 0.43 | 0.00 | 0.00 | 0.56 | 0.24 | 24 | Matrix Fibroblast |
| Txn1l         | 0.42 | 0.00 | 0.00 | 0.48 | 0.19 | 24 | Matrix Fibroblast |
| Idh2          | 0.47 | 0.00 | 0.00 | 0.48 | 0.19 | 24 | Matrix Fibroblast |
| Fkbp3         | 0.43 | 0.00 | 0.00 | 0.64 | 0.30 | 24 | Matrix Fibroblast |
| Adam19        | 0.38 | 0.00 | 0.00 | 0.30 | 0.10 | 24 | Matrix Fibroblast |
| Arl6ip1       | 0.71 | 0.00 | 0.00 | 0.80 | 0.52 | 24 | Matrix Fibroblast |
| Commd1        | 0.42 | 0.00 | 0.00 | 0.50 | 0.21 | 24 | Matrix Fibroblast |
| Mmp14         | 0.37 | 0.00 | 0.00 | 0.59 | 0.25 | 24 | Matrix Fibroblast |
| Tsen34        | 0.36 | 0.00 | 0.00 | 0.38 | 0.14 | 24 | Matrix Fibroblast |
| Eny2          | 0.37 | 0.00 | 0.00 | 0.55 | 0.23 | 24 | Matrix Fibroblast |
| Tcerg1        | 0.39 | 0.00 | 0.00 | 0.49 | 0.20 | 24 | Matrix Fibroblast |
| Hist1h1c      | 0.52 | 0.00 | 0.00 | 0.33 | 0.11 | 24 | Matrix Fibroblast |
| Srsf2         | 0.48 | 0.00 | 0.00 | 0.73 | 0.38 | 24 | Matrix Fibroblast |
| Pds5b         | 0.42 | 0.00 | 0.00 | 0.36 | 0.13 | 24 | Matrix Fibroblast |
| 2010111I01Rik | 0.34 | 0.00 | 0.00 | 0.29 | 0.09 | 24 | Matrix Fibroblast |
| Nme1          | 0.35 | 0.00 | 0.00 | 0.47 | 0.19 | 24 | Matrix Fibroblast |
| Ctdspl2       | 0.39 | 0.00 | 0.00 | 0.34 | 0.11 | 24 | Matrix Fibroblast |
| Snrnp40       | 0.29 | 0.00 | 0.00 | 0.28 | 0.08 | 24 | Matrix Fibroblast |
| Ctcf          | 0.43 | 0.00 | 0.00 | 0.54 | 0.23 | 24 | Matrix Fibroblast |
| Rbmxl1        | 0.34 | 0.00 | 0.00 | 0.32 | 0.11 | 24 | Matrix Fibroblast |
| Smc3          | 0.47 | 0.00 | 0.00 | 0.72 | 0.38 | 24 | Matrix Fibroblast |
| Orc6          | 0.35 | 0.00 | 0.00 | 0.31 | 0.10 | 24 | Matrix Fibroblast |
| Purb          | 0.45 | 0.00 | 0.00 | 0.72 | 0.37 | 24 | Matrix Fibroblast |
| Actl6a        | 0.32 | 0.00 | 0.00 | 0.33 | 0.11 | 24 | Matrix Fibroblast |
| Gm5641        | 0.55 | 0.00 | 0.00 | 0.69 | 0.36 | 24 | Matrix Fibroblast |
| Gm23493       | 0.28 | 0.00 | 0.00 | 0.27 | 0.08 | 24 | Matrix Fibroblast |
| Fam92a        | 0.33 | 0.00 | 0.00 | 0.30 | 0.10 | 24 | Matrix Fibroblast |
| 9530068E07Rik | 0.38 | 0.00 | 0.00 | 0.44 | 0.17 | 24 | Matrix Fibroblast |
| Cacybp        | 0.32 | 0.00 | 0.00 | 0.50 | 0.21 | 24 | Matrix Fibroblast |

|         |       |      |      |      |      |      |    |                   |
|---------|-------|------|------|------|------|------|----|-------------------|
| Hspa14  |       | 0.31 | 0.00 | 0.00 | 0.31 | 0.11 | 24 | Matrix Fibroblast |
| Anapc11 |       | 0.34 | 0.00 | 0.00 | 0.43 | 0.17 | 24 | Matrix Fibroblast |
| Sumo2   |       | 0.43 | 0.00 | 0.00 | 0.62 | 0.30 | 24 | Matrix Fibroblast |
| Map4k3  |       | 0.37 | 0.00 | 0.00 | 0.25 | 0.08 | 24 | Matrix Fibroblast |
| Gpx8    |       | 0.35 | 0.00 | 0.00 | 0.39 | 0.14 | 24 | Matrix Fibroblast |
| Pten    |       | 0.40 | 0.00 | 0.00 | 0.34 | 0.12 | 24 | Matrix Fibroblast |
| Itgb1   |       | 0.41 | 0.00 | 0.00 | 0.90 | 0.63 | 24 | Matrix Fibroblast |
| Mapre1  |       | 0.38 | 0.00 | 0.00 | 0.62 | 0.29 | 24 | Matrix Fibroblast |
| Smchd1  |       | 0.38 | 0.00 | 0.00 | 0.41 | 0.16 | 24 | Matrix Fibroblast |
| Naa38   |       | 0.33 | 0.00 | 0.00 | 0.39 | 0.15 | 24 | Matrix Fibroblast |
| Phlda1  |       | 0.32 | 0.00 | 0.00 | 0.49 | 0.20 | 24 | Matrix Fibroblast |
| H1f0    |       | 0.50 | 0.00 | 0.00 | 0.57 | 0.27 | 24 | Matrix Fibroblast |
| Cyth3   |       | 0.33 | 0.00 | 0.00 | 0.57 | 0.25 | 24 | Matrix Fibroblast |
| Hars    |       | 0.36 | 0.00 | 0.00 | 0.30 | 0.10 | 24 | Matrix Fibroblast |
| Morf4l2 |       | 0.44 | 0.00 | 0.00 | 0.51 | 0.22 | 24 | Matrix Fibroblast |
| Gm12355 |       | 0.46 | 0.00 | 0.00 | 0.57 | 0.26 | 24 | Matrix Fibroblast |
| Fkbp2   |       | 0.43 | 0.00 | 0.00 | 0.44 | 0.18 | 24 | Matrix Fibroblast |
| Rgs10   |       | 0.27 | 0.00 | 0.00 | 0.30 | 0.10 | 24 | Matrix Fibroblast |
| Taf9    |       | 0.37 | 0.00 | 0.00 | 0.45 | 0.18 | 24 | Matrix Fibroblast |
| Nudc    |       | 0.41 | 0.00 | 0.00 | 0.48 | 0.21 | 24 | Matrix Fibroblast |
| Eng     |       | 0.28 | 0.00 | 0.00 | 0.33 | 0.11 | 24 | Matrix Fibroblast |
| Fmr1    |       | 0.40 | 0.00 | 0.00 | 0.38 | 0.15 | 24 | Matrix Fibroblast |
| Pdap1   |       | 0.49 | 0.00 | 0.00 | 0.79 | 0.45 | 24 | Matrix Fibroblast |
| Tmsb10  |       | 0.34 | 0.00 | 0.00 | 0.99 | 0.86 | 24 | Matrix Fibroblast |
| Fundc2  |       | 0.34 | 0.00 | 0.00 | 0.42 | 0.17 | 24 | Matrix Fibroblast |
| Phf5a   |       | 0.37 | 0.00 | 0.00 | 0.46 | 0.19 | 24 | Matrix Fibroblast |
| Gm6563  |       | 0.44 | 0.00 | 0.00 | 0.66 | 0.33 | 24 | Matrix Fibroblast |
| Nudt21  |       | 0.39 | 0.00 | 0.00 | 0.34 | 0.12 | 24 | Matrix Fibroblast |
| Oat     |       | 0.31 | 0.00 | 0.00 | 0.35 | 0.13 | 24 | Matrix Fibroblast |
| Mxra7   |       | 0.28 | 0.00 | 0.00 | 0.38 | 0.14 | 24 | Matrix Fibroblast |
| Med19   |       | 0.35 | 0.00 | 0.00 | 0.32 | 0.11 | 24 | Matrix Fibroblast |
| Parva   |       | 0.32 | 0.00 | 0.00 | 0.41 | 0.16 | 24 | Matrix Fibroblast |
| Snrpe   |       | 0.43 | 0.00 | 0.00 | 0.69 | 0.36 | 24 | Matrix Fibroblast |
|         | 2-Sep | 0.44 | 0.00 | 0.00 | 0.67 | 0.35 | 24 | Matrix Fibroblast |
| Tgfb1i1 |       | 0.31 | 0.00 | 0.00 | 0.36 | 0.13 | 24 | Matrix Fibroblast |
| Nr3c1   |       | 0.39 | 0.00 | 0.00 | 0.56 | 0.25 | 24 | Matrix Fibroblast |
| Anapc5  |       | 0.38 | 0.00 | 0.00 | 0.44 | 0.18 | 24 | Matrix Fibroblast |
| Dynlt1b |       | 0.39 | 0.00 | 0.00 | 0.55 | 0.25 | 24 | Matrix Fibroblast |
| Tead1   |       | 0.33 | 0.00 | 0.00 | 0.37 | 0.14 | 24 | Matrix Fibroblast |
| Lsm6    |       | 0.37 | 0.00 | 0.00 | 0.35 | 0.13 | 24 | Matrix Fibroblast |
| Pole3   |       | 0.27 | 0.00 | 0.00 | 0.31 | 0.11 | 24 | Matrix Fibroblast |
| Vezf1   |       | 0.36 | 0.00 | 0.00 | 0.53 | 0.24 | 24 | Matrix Fibroblast |
| Picalm  |       | 0.36 | 0.00 | 0.00 | 0.49 | 0.21 | 24 | Matrix Fibroblast |

|          |      |      |      |      |      |    |                   |
|----------|------|------|------|------|------|----|-------------------|
| Set      | 0.46 | 0.00 | 0.00 | 0.65 | 0.34 | 24 | Matrix Fibroblast |
| Hnrnpa3  | 0.47 | 0.00 | 0.00 | 0.78 | 0.46 | 24 | Matrix Fibroblast |
| Hnrnph1  | 0.41 | 0.00 | 0.00 | 0.73 | 0.38 | 24 | Matrix Fibroblast |
| Prnp     | 0.39 | 0.00 | 0.00 | 0.33 | 0.12 | 24 | Matrix Fibroblast |
| Hmcn1    | 0.25 | 0.00 | 0.00 | 0.37 | 0.14 | 24 | Matrix Fibroblast |
| Brd3     | 0.42 | 0.00 | 0.00 | 0.54 | 0.25 | 24 | Matrix Fibroblast |
| Lyar     | 0.38 | 0.00 | 0.00 | 0.39 | 0.15 | 24 | Matrix Fibroblast |
| Gm8991   | 0.44 | 0.00 | 0.00 | 0.51 | 0.23 | 24 | Matrix Fibroblast |
| Nutf2    | 0.29 | 0.00 | 0.00 | 0.35 | 0.13 | 24 | Matrix Fibroblast |
| Pagr1a   | 0.31 | 0.00 | 0.00 | 0.26 | 0.09 | 24 | Matrix Fibroblast |
| Lap3     | 0.31 | 0.00 | 0.00 | 0.29 | 0.10 | 24 | Matrix Fibroblast |
| Ddx39b   | 0.36 | 0.00 | 0.00 | 0.47 | 0.21 | 24 | Matrix Fibroblast |
| Ing1     | 0.33 | 0.00 | 0.00 | 0.39 | 0.15 | 24 | Matrix Fibroblast |
| Cox20    | 0.36 | 0.00 | 0.00 | 0.43 | 0.18 | 24 | Matrix Fibroblast |
| Pdia6    | 0.34 | 0.00 | 0.00 | 0.63 | 0.30 | 24 | Matrix Fibroblast |
| Ddost    | 0.37 | 0.00 | 0.00 | 0.45 | 0.19 | 24 | Matrix Fibroblast |
| Rbm3     | 0.44 | 0.00 | 0.00 | 0.73 | 0.41 | 24 | Matrix Fibroblast |
| Sh3pxd2a | 0.34 | 0.00 | 0.00 | 0.29 | 0.10 | 24 | Matrix Fibroblast |
| Mrpl18   | 0.33 | 0.00 | 0.00 | 0.48 | 0.21 | 24 | Matrix Fibroblast |
| Ddx39    | 0.28 | 0.00 | 0.00 | 0.28 | 0.09 | 24 | Matrix Fibroblast |
| Txndc12  | 0.27 | 0.00 | 0.00 | 0.26 | 0.09 | 24 | Matrix Fibroblast |
| Dynlt1a  | 0.33 | 0.00 | 0.00 | 0.52 | 0.23 | 24 | Matrix Fibroblast |
| Matr3    | 0.47 | 0.00 | 0.00 | 0.71 | 0.41 | 24 | Matrix Fibroblast |
| Sptssa   | 0.31 | 0.00 | 0.00 | 0.47 | 0.20 | 24 | Matrix Fibroblast |
| Ndufa11  | 0.37 | 0.00 | 0.00 | 0.57 | 0.27 | 24 | Matrix Fibroblast |
| Cnot6    | 0.28 | 0.00 | 0.00 | 0.40 | 0.16 | 24 | Matrix Fibroblast |
| Kdelr2   | 0.38 | 0.00 | 0.00 | 0.45 | 0.19 | 24 | Matrix Fibroblast |
| Ttc3     | 0.38 | 0.00 | 0.00 | 0.60 | 0.29 | 24 | Matrix Fibroblast |
| Snrpd3   | 0.43 | 0.00 | 0.00 | 0.62 | 0.32 | 24 | Matrix Fibroblast |
| Marcks   | 0.28 | 0.00 | 0.00 | 0.88 | 0.50 | 24 | Matrix Fibroblast |
| Fam115a  | 0.36 | 0.00 | 0.00 | 0.36 | 0.14 | 24 | Matrix Fibroblast |
| Hnrnpdl  | 0.36 | 0.00 | 0.00 | 0.71 | 0.37 | 24 | Matrix Fibroblast |
| Gtf2e2   | 0.29 | 0.00 | 0.00 | 0.28 | 0.09 | 24 | Matrix Fibroblast |
| 7-Sep    | 0.38 | 0.00 | 0.00 | 0.87 | 0.59 | 24 | Matrix Fibroblast |
| Hint1    | 0.45 | 0.00 | 0.00 | 0.76 | 0.46 | 24 | Matrix Fibroblast |
| Nfyb     | 0.31 | 0.00 | 0.00 | 0.32 | 0.12 | 24 | Matrix Fibroblast |
| Bzw2     | 0.28 | 0.00 | 0.00 | 0.38 | 0.15 | 24 | Matrix Fibroblast |
| Fgfr1    | 0.30 | 0.00 | 0.00 | 0.30 | 0.11 | 24 | Matrix Fibroblast |
| Nop56    | 0.34 | 0.00 | 0.00 | 0.46 | 0.20 | 24 | Matrix Fibroblast |
| Dpy30    | 0.32 | 0.00 | 0.00 | 0.37 | 0.14 | 24 | Matrix Fibroblast |
| Gm4204   | 0.36 | 0.00 | 0.00 | 0.80 | 0.50 | 24 | Matrix Fibroblast |
| Anxa6    | 0.31 | 0.00 | 0.00 | 0.47 | 0.20 | 24 | Matrix Fibroblast |
| Cfdp1    | 0.32 | 0.00 | 0.00 | 0.72 | 0.38 | 24 | Matrix Fibroblast |

|               |      |      |      |      |      |    |                   |
|---------------|------|------|------|------|------|----|-------------------|
| Maged1        | 0.26 | 0.00 | 0.00 | 0.45 | 0.18 | 24 | Matrix Fibroblast |
| Nedd4         | 0.38 | 0.00 | 0.00 | 0.85 | 0.53 | 24 | Matrix Fibroblast |
| Zfp131        | 0.30 | 0.00 | 0.00 | 0.33 | 0.12 | 24 | Matrix Fibroblast |
| Cct8          | 0.27 | 0.00 | 0.00 | 0.48 | 0.21 | 24 | Matrix Fibroblast |
| Epb4.1l2      | 0.29 | 0.00 | 0.00 | 0.45 | 0.19 | 24 | Matrix Fibroblast |
| Tra2b         | 0.35 | 0.00 | 0.00 | 0.60 | 0.29 | 24 | Matrix Fibroblast |
| Tssc4         | 0.30 | 0.00 | 0.00 | 0.26 | 0.09 | 24 | Matrix Fibroblast |
| Entpd1        | 0.29 | 0.00 | 0.00 | 0.27 | 0.09 | 24 | Matrix Fibroblast |
| G3bp1         | 0.30 | 0.00 | 0.00 | 0.42 | 0.17 | 24 | Matrix Fibroblast |
| Hnrnpd        | 0.39 | 0.00 | 0.00 | 0.57 | 0.28 | 24 | Matrix Fibroblast |
| Nutf2-ps1     | 0.28 | 0.00 | 0.00 | 0.30 | 0.11 | 24 | Matrix Fibroblast |
| Sec13         | 0.29 | 0.00 | 0.00 | 0.42 | 0.17 | 24 | Matrix Fibroblast |
| Snrpa1        | 0.27 | 0.00 | 0.00 | 0.37 | 0.14 | 24 | Matrix Fibroblast |
| Rnps1         | 0.27 | 0.00 | 0.00 | 0.38 | 0.15 | 24 | Matrix Fibroblast |
| Emp3          | 0.26 | 0.00 | 0.00 | 0.49 | 0.21 | 24 | Matrix Fibroblast |
| Anxa5         | 0.39 | 0.00 | 0.00 | 0.73 | 0.40 | 24 | Matrix Fibroblast |
| B230219D22Rik | 0.35 | 0.00 | 0.00 | 0.58 | 0.27 | 24 | Matrix Fibroblast |
| Snrpd2        | 0.38 | 0.00 | 0.00 | 0.53 | 0.25 | 24 | Matrix Fibroblast |
| Ccdc127       | 0.37 | 0.00 | 0.00 | 0.30 | 0.11 | 24 | Matrix Fibroblast |
| Mesdc2        | 0.38 | 0.00 | 0.00 | 0.43 | 0.19 | 24 | Matrix Fibroblast |
| Lgmn          | 0.25 | 0.00 | 0.00 | 0.34 | 0.13 | 24 | Matrix Fibroblast |
| Fam98b        | 0.26 | 0.00 | 0.00 | 0.29 | 0.10 | 24 | Matrix Fibroblast |
| Lman1         | 0.27 | 0.00 | 0.00 | 0.43 | 0.18 | 24 | Matrix Fibroblast |
| Rnf168        | 0.36 | 0.00 | 0.00 | 0.34 | 0.14 | 24 | Matrix Fibroblast |
| Scpep1        | 0.27 | 0.00 | 0.00 | 0.26 | 0.09 | 24 | Matrix Fibroblast |
| Cdc123        | 0.31 | 0.00 | 0.00 | 0.33 | 0.13 | 24 | Matrix Fibroblast |
| Ankrd32       | 0.37 | 0.00 | 0.00 | 0.29 | 0.11 | 24 | Matrix Fibroblast |
| Gm5160        | 0.33 | 0.00 | 0.00 | 0.48 | 0.22 | 24 | Matrix Fibroblast |
| Stip1         | 0.30 | 0.00 | 0.00 | 0.34 | 0.13 | 24 | Matrix Fibroblast |
| Srrt          | 0.31 | 0.00 | 0.00 | 0.46 | 0.20 | 24 | Matrix Fibroblast |
| Ssb           | 0.42 | 0.00 | 0.00 | 0.84 | 0.55 | 24 | Matrix Fibroblast |
| Tjp2          | 0.30 | 0.00 | 0.00 | 0.40 | 0.17 | 24 | Matrix Fibroblast |
| Fkbp7         | 0.28 | 0.00 | 0.00 | 0.34 | 0.13 | 24 | Matrix Fibroblast |
| Snrpf         | 0.38 | 0.00 | 0.00 | 0.57 | 0.28 | 24 | Matrix Fibroblast |
| Leo1          | 0.33 | 0.00 | 0.00 | 0.33 | 0.13 | 24 | Matrix Fibroblast |
| Ctgf          | 0.25 | 0.00 | 0.00 | 0.25 | 0.09 | 24 | Matrix Fibroblast |
| Gsk3b         | 0.32 | 0.00 | 0.00 | 0.57 | 0.28 | 24 | Matrix Fibroblast |
| Ngfrap1       | 0.27 | 0.00 | 0.00 | 0.52 | 0.24 | 24 | Matrix Fibroblast |
| Ubal2         | 0.29 | 0.00 | 0.00 | 0.37 | 0.15 | 24 | Matrix Fibroblast |
| Cnep1r1       | 0.30 | 0.00 | 0.00 | 0.30 | 0.11 | 24 | Matrix Fibroblast |
| Acp1          | 0.33 | 0.00 | 0.00 | 0.35 | 0.14 | 24 | Matrix Fibroblast |
| Hnrnp3        | 0.35 | 0.00 | 0.00 | 0.41 | 0.18 | 24 | Matrix Fibroblast |
| Cnih1         | 0.34 | 0.00 | 0.00 | 0.43 | 0.19 | 24 | Matrix Fibroblast |

|               |      |      |      |      |      |    |                   |
|---------------|------|------|------|------|------|----|-------------------|
| Dynlt1f       | 0.29 | 0.00 | 0.00 | 0.52 | 0.24 | 24 | Matrix Fibroblast |
| Dynlt1c       | 0.33 | 0.00 | 0.00 | 0.56 | 0.27 | 24 | Matrix Fibroblast |
| Vbp1          | 0.34 | 0.00 | 0.00 | 0.37 | 0.15 | 24 | Matrix Fibroblast |
| Smarca4       | 0.35 | 0.00 | 0.00 | 0.40 | 0.17 | 24 | Matrix Fibroblast |
| Pnrc2         | 0.39 | 0.00 | 0.00 | 0.43 | 0.19 | 24 | Matrix Fibroblast |
| Stag1         | 0.29 | 0.00 | 0.00 | 0.32 | 0.12 | 24 | Matrix Fibroblast |
| Lsm5          | 0.31 | 0.00 | 0.00 | 0.31 | 0.12 | 24 | Matrix Fibroblast |
| Zfp260        | 0.30 | 0.00 | 0.00 | 0.33 | 0.13 | 24 | Matrix Fibroblast |
| Lsm4          | 0.34 | 0.00 | 0.00 | 0.45 | 0.21 | 24 | Matrix Fibroblast |
| Adprh         | 0.25 | 0.00 | 0.00 | 0.31 | 0.12 | 24 | Matrix Fibroblast |
| Phldb2        | 0.31 | 0.00 | 0.00 | 0.59 | 0.29 | 24 | Matrix Fibroblast |
| Gm10093       | 0.26 | 0.00 | 0.00 | 0.44 | 0.19 | 24 | Matrix Fibroblast |
| Atp2b1        | 0.36 | 0.00 | 0.00 | 0.88 | 0.58 | 24 | Matrix Fibroblast |
| Sox4          | 0.28 | 0.00 | 0.00 | 0.69 | 0.37 | 24 | Matrix Fibroblast |
| Pdia4         | 0.33 | 0.00 | 0.00 | 0.46 | 0.21 | 24 | Matrix Fibroblast |
| Spin1         | 0.26 | 0.00 | 0.00 | 0.29 | 0.11 | 24 | Matrix Fibroblast |
| Srsf1         | 0.29 | 0.00 | 0.00 | 0.34 | 0.14 | 24 | Matrix Fibroblast |
| Pcnt          | 0.35 | 0.00 | 0.00 | 0.34 | 0.14 | 24 | Matrix Fibroblast |
| Cd81          | 0.30 | 0.00 | 0.00 | 0.74 | 0.41 | 24 | Matrix Fibroblast |
| Thrap3        | 0.35 | 0.00 | 0.00 | 0.69 | 0.37 | 24 | Matrix Fibroblast |
| Topors        | 0.29 | 0.00 | 0.00 | 0.30 | 0.12 | 24 | Matrix Fibroblast |
| Ptges3        | 0.35 | 0.00 | 0.00 | 0.50 | 0.25 | 24 | Matrix Fibroblast |
| Gm9242        | 0.39 | 0.00 | 0.00 | 0.49 | 0.24 | 24 | Matrix Fibroblast |
| Impad1        | 0.27 | 0.00 | 0.00 | 0.36 | 0.15 | 24 | Matrix Fibroblast |
| Lamc1         | 0.28 | 0.00 | 0.00 | 0.37 | 0.16 | 24 | Matrix Fibroblast |
| Mlf2          | 0.27 | 0.00 | 0.00 | 0.34 | 0.14 | 24 | Matrix Fibroblast |
| Twsg1         | 0.26 | 0.00 | 0.00 | 0.30 | 0.12 | 24 | Matrix Fibroblast |
| Ssr1          | 0.29 | 0.00 | 0.00 | 0.51 | 0.25 | 24 | Matrix Fibroblast |
| Nudt4         | 0.30 | 0.00 | 0.00 | 0.39 | 0.17 | 24 | Matrix Fibroblast |
| Nap1l1        | 0.29 | 0.00 | 0.00 | 0.77 | 0.47 | 24 | Matrix Fibroblast |
| Magt1         | 0.27 | 0.00 | 0.00 | 0.44 | 0.20 | 24 | Matrix Fibroblast |
| Smc5          | 0.26 | 0.00 | 0.00 | 0.38 | 0.16 | 24 | Matrix Fibroblast |
| Ywhah         | 0.30 | 0.00 | 0.00 | 0.53 | 0.26 | 24 | Matrix Fibroblast |
| Mrfap1        | 0.33 | 0.00 | 0.00 | 0.62 | 0.33 | 24 | Matrix Fibroblast |
| Papola        | 0.29 | 0.00 | 0.00 | 0.49 | 0.24 | 24 | Matrix Fibroblast |
| Psmc2         | 0.27 | 0.00 | 0.00 | 0.36 | 0.15 | 24 | Matrix Fibroblast |
| Hspa5         | 0.33 | 0.00 | 0.00 | 0.83 | 0.55 | 24 | Matrix Fibroblast |
| Cfl2          | 0.29 | 0.00 | 0.00 | 0.51 | 0.25 | 24 | Matrix Fibroblast |
| Dhx15         | 0.27 | 0.00 | 0.00 | 0.54 | 0.27 | 24 | Matrix Fibroblast |
| Vkorc1        | 0.32 | 0.00 | 0.00 | 0.27 | 0.10 | 24 | Matrix Fibroblast |
| Scoc          | 0.35 | 0.00 | 0.00 | 0.31 | 0.13 | 24 | Matrix Fibroblast |
| 1110004F10Rik | 0.31 | 0.00 | 0.00 | 0.55 | 0.29 | 24 | Matrix Fibroblast |
| Wbp11         | 0.28 | 0.00 | 0.00 | 0.49 | 0.24 | 24 | Matrix Fibroblast |

|         |      |      |      |      |      |    |                   |
|---------|------|------|------|------|------|----|-------------------|
| Gm10053 | 0.26 | 0.00 | 0.00 | 0.46 | 0.22 | 24 | Matrix Fibroblast |
| Hnrnpc  | 0.30 | 0.00 | 0.00 | 0.75 | 0.44 | 24 | Matrix Fibroblast |
| Magoh   | 0.27 | 0.00 | 0.00 | 0.37 | 0.16 | 24 | Matrix Fibroblast |
| Pcm1    | 0.29 | 0.00 | 0.00 | 0.54 | 0.27 | 24 | Matrix Fibroblast |
| Hp1bp3  | 0.37 | 0.00 | 0.00 | 0.73 | 0.44 | 24 | Matrix Fibroblast |
| Ift74   | 0.25 | 0.00 | 0.00 | 0.26 | 0.10 | 24 | Matrix Fibroblast |
| Snrpb   | 0.31 | 0.00 | 0.00 | 0.65 | 0.35 | 24 | Matrix Fibroblast |
| Wbp5    | 0.26 | 0.00 | 0.00 | 0.79 | 0.48 | 24 | Matrix Fibroblast |
| Rfc1    | 0.33 | 0.00 | 0.00 | 0.43 | 0.21 | 24 | Matrix Fibroblast |
| Nap1l4  | 0.27 | 0.00 | 0.00 | 0.53 | 0.26 | 24 | Matrix Fibroblast |
| Prdx2   | 0.30 | 0.00 | 0.00 | 0.62 | 0.33 | 24 | Matrix Fibroblast |
| Mrpl42  | 0.26 | 0.00 | 0.00 | 0.32 | 0.13 | 24 | Matrix Fibroblast |
| Hnrnpa0 | 0.35 | 0.00 | 0.00 | 0.44 | 0.21 | 24 | Matrix Fibroblast |
| Eif4a1  | 0.31 | 0.00 | 0.00 | 0.65 | 0.36 | 24 | Matrix Fibroblast |
| Gm26735 | 0.30 | 0.00 | 0.00 | 0.41 | 0.19 | 24 | Matrix Fibroblast |
| Pebp1   | 0.26 | 0.00 | 0.00 | 0.51 | 0.25 | 24 | Matrix Fibroblast |
| Lrrcc1  | 0.32 | 0.00 | 0.00 | 0.29 | 0.12 | 24 | Matrix Fibroblast |
| Jmy     | 0.32 | 0.00 | 0.00 | 0.29 | 0.12 | 24 | Matrix Fibroblast |
| Arf4    | 0.30 | 0.00 | 0.00 | 0.53 | 0.27 | 24 | Matrix Fibroblast |
| Tial1   | 0.27 | 0.00 | 0.00 | 0.46 | 0.22 | 24 | Matrix Fibroblast |
| Ncl     | 0.29 | 0.00 | 0.00 | 0.97 | 0.78 | 24 | Matrix Fibroblast |
| Cnih4   | 0.26 | 0.00 | 0.00 | 0.34 | 0.14 | 24 | Matrix Fibroblast |
| Myo1b   | 0.27 | 0.00 | 0.00 | 0.38 | 0.17 | 24 | Matrix Fibroblast |
| Suz12   | 0.31 | 0.00 | 0.00 | 0.31 | 0.13 | 24 | Matrix Fibroblast |
| Ssr2    | 0.29 | 0.00 | 0.00 | 0.58 | 0.31 | 24 | Matrix Fibroblast |
| Srsf10  | 0.29 | 0.00 | 0.00 | 0.50 | 0.25 | 24 | Matrix Fibroblast |
| Calr    | 0.40 | 0.00 | 0.00 | 0.69 | 0.43 | 24 | Matrix Fibroblast |
| Hdac2   | 0.26 | 0.00 | 0.00 | 0.35 | 0.15 | 24 | Matrix Fibroblast |
| Bcas2   | 0.25 | 0.00 | 0.00 | 0.44 | 0.21 | 24 | Matrix Fibroblast |
| Mtus1   | 0.28 | 0.00 | 0.00 | 0.38 | 0.17 | 24 | Matrix Fibroblast |
| Asf1a   | 0.28 | 0.00 | 0.00 | 0.27 | 0.11 | 24 | Matrix Fibroblast |
| Khdrbs1 | 0.33 | 0.00 | 0.00 | 0.57 | 0.31 | 24 | Matrix Fibroblast |
| Rsrc1   | 0.25 | 0.00 | 0.00 | 0.33 | 0.14 | 24 | Matrix Fibroblast |
| Hnrnpu  | 0.33 | 0.00 | 0.00 | 0.89 | 0.64 | 24 | Matrix Fibroblast |
| Uqcr10  | 0.30 | 0.00 | 0.00 | 0.63 | 0.36 | 24 | Matrix Fibroblast |
| Eif4g2  | 0.29 | 0.00 | 0.00 | 0.70 | 0.41 | 24 | Matrix Fibroblast |
| Tceb2   | 0.30 | 0.00 | 0.00 | 0.76 | 0.47 | 24 | Matrix Fibroblast |
| Dynll1  | 0.31 | 0.00 | 0.00 | 0.73 | 0.45 | 24 | Matrix Fibroblast |
| Pbrm1   | 0.30 | 0.00 | 0.00 | 0.56 | 0.30 | 24 | Matrix Fibroblast |
| Vps36   | 0.31 | 0.00 | 0.00 | 0.54 | 0.29 | 24 | Matrix Fibroblast |
| Dhx9    | 0.26 | 0.00 | 0.00 | 0.40 | 0.19 | 24 | Matrix Fibroblast |
| Eprs    | 0.25 | 0.00 | 0.00 | 0.46 | 0.22 | 24 | Matrix Fibroblast |
| Pcnp    | 0.27 | 0.00 | 0.00 | 0.42 | 0.20 | 24 | Matrix Fibroblast |

|           |      |      |      |      |      |    |                   |
|-----------|------|------|------|------|------|----|-------------------|
| Serbp1    | 0.28 | 0.00 | 0.00 | 0.93 | 0.75 | 24 | Matrix Fibroblast |
| Ube2n     | 0.26 | 0.00 | 0.00 | 0.34 | 0.15 | 24 | Matrix Fibroblast |
| Sarnp     | 0.30 | 0.00 | 0.00 | 0.49 | 0.25 | 24 | Matrix Fibroblast |
| Ccar1     | 0.28 | 0.00 | 0.00 | 0.60 | 0.33 | 24 | Matrix Fibroblast |
| Siva1     | 0.30 | 0.00 | 0.00 | 0.33 | 0.15 | 24 | Matrix Fibroblast |
| Tardbp    | 0.29 | 0.00 | 0.00 | 0.56 | 0.31 | 24 | Matrix Fibroblast |
| Phip      | 0.27 | 0.00 | 0.00 | 0.35 | 0.16 | 24 | Matrix Fibroblast |
| Ppp2r2d   | 0.25 | 0.00 | 0.00 | 0.26 | 0.11 | 24 | Matrix Fibroblast |
| Lpp       | 0.27 | 0.00 | 0.00 | 0.43 | 0.22 | 24 | Matrix Fibroblast |
| Cox7a2    | 0.27 | 0.00 | 0.00 | 0.77 | 0.48 | 24 | Matrix Fibroblast |
| Cux1      | 0.27 | 0.00 | 0.00 | 0.35 | 0.17 | 24 | Matrix Fibroblast |
| Canx      | 0.26 | 0.00 | 0.00 | 0.78 | 0.49 | 24 | Matrix Fibroblast |
| Hnrnpm    | 0.26 | 0.00 | 0.00 | 0.77 | 0.49 | 24 | Matrix Fibroblast |
| Gclm      | 0.34 | 0.00 | 0.00 | 0.66 | 0.42 | 24 | Matrix Fibroblast |
| Sf3b2     | 0.25 | 0.00 | 0.00 | 0.67 | 0.40 | 24 | Matrix Fibroblast |
| Npm1      | 0.31 | 0.00 | 0.00 | 0.81 | 0.58 | 24 | Matrix Fibroblast |
| Glg1      | 0.25 | 0.00 | 0.00 | 0.39 | 0.19 | 24 | Matrix Fibroblast |
| Ostc      | 0.25 | 0.00 | 0.00 | 0.45 | 0.23 | 24 | Matrix Fibroblast |
| Ywhaq     | 0.30 | 0.00 | 0.00 | 0.61 | 0.37 | 24 | Matrix Fibroblast |
| Ubb       | 0.26 | 0.00 | 0.00 | 0.95 | 0.81 | 24 | Matrix Fibroblast |
| Chd4      | 0.26 | 0.00 | 0.00 | 0.76 | 0.48 | 24 | Matrix Fibroblast |
| Gm4076    | 0.25 | 0.00 | 0.00 | 0.41 | 0.21 | 24 | Matrix Fibroblast |
| Hdgfrp2   | 0.26 | 0.00 | 0.00 | 0.26 | 0.12 | 24 | Matrix Fibroblast |
| Prdx1     | 0.27 | 0.00 | 0.00 | 0.75 | 0.50 | 24 | Matrix Fibroblast |
| Smarca5   | 0.31 | 0.00 | 0.00 | 0.52 | 0.31 | 24 | Matrix Fibroblast |
| Pdia3     | 0.26 | 0.00 | 0.00 | 0.69 | 0.44 | 24 | Matrix Fibroblast |
| Psmc3     | 0.27 | 0.00 | 0.00 | 0.50 | 0.29 | 24 | Matrix Fibroblast |
| Tcp1      | 0.25 | 0.00 | 0.00 | 0.43 | 0.24 | 24 | Matrix Fibroblast |
| Cox6c     | 0.29 | 0.00 | 0.00 | 0.84 | 0.65 | 24 | Matrix Fibroblast |
| Zbtb20    | 0.26 | 0.00 | 0.00 | 0.48 | 0.27 | 24 | Matrix Fibroblast |
| mt-Nd5    | 0.27 | 0.00 | 0.00 | 0.93 | 0.76 | 24 | Matrix Fibroblast |
| mt-Nd2    | 0.26 | 0.00 | 0.00 | 0.88 | 0.70 | 24 | Matrix Fibroblast |
| Hist1h2ao | 2.51 | 0.00 | 0.00 | 0.92 | 0.15 | 25 | T Cell            |
| Hist1h2ap | 2.49 | 0.00 | 0.00 | 0.92 | 0.15 | 25 | T Cell            |
| Hist1h2ag | 2.34 | 0.00 | 0.00 | 0.87 | 0.11 | 25 | T Cell            |
| Top2a     | 2.27 | 0.00 | 0.00 | 0.94 | 0.11 | 25 | T Cell            |
| Hist1h2ac | 2.24 | 0.00 | 0.00 | 0.87 | 0.10 | 25 | T Cell            |
| Hist1h2ad | 2.22 | 0.00 | 0.00 | 0.85 | 0.10 | 25 | T Cell            |
| Hist1h2ah | 2.20 | 0.00 | 0.00 | 0.85 | 0.09 | 25 | T Cell            |
| Trbc2     | 2.17 | 0.00 | 0.00 | 0.86 | 0.04 | 25 | T Cell            |
| Hist1h2ai | 2.16 | 0.00 | 0.00 | 0.83 | 0.10 | 25 | T Cell            |
| Hist1h2an | 2.16 | 0.00 | 0.00 | 0.81 | 0.09 | 25 | T Cell            |
| Mki67     | 2.09 | 0.00 | 0.00 | 0.95 | 0.12 | 25 | T Cell            |

|               |      |      |      |      |      |    |        |
|---------------|------|------|------|------|------|----|--------|
| Hist1h2af     | 2.09 | 0.00 | 0.00 | 0.83 | 0.09 | 25 | T Cell |
| 2810417H13Rik | 2.08 | 0.00 | 0.00 | 0.86 | 0.08 | 25 | T Cell |
| Hist1h2ab     | 2.03 | 0.00 | 0.00 | 0.84 | 0.09 | 25 | T Cell |
| Hist1h2ae     | 2.02 | 0.00 | 0.00 | 0.81 | 0.09 | 25 | T Cell |
| Ms4a4b        | 2.00 | 0.00 | 0.00 | 0.67 | 0.05 | 25 | T Cell |
| Hist1h2ak     | 1.95 | 0.00 | 0.00 | 0.78 | 0.07 | 25 | T Cell |
| Trbc1         | 1.94 | 0.00 | 0.00 | 0.78 | 0.03 | 25 | T Cell |
| Nusap1        | 1.83 | 0.00 | 0.00 | 0.73 | 0.06 | 25 | T Cell |
| Birc5         | 1.77 | 0.00 | 0.00 | 0.81 | 0.06 | 25 | T Cell |
| H2afx         | 1.73 | 0.00 | 0.00 | 0.80 | 0.09 | 25 | T Cell |
| Ube2c         | 1.60 | 0.00 | 0.00 | 0.62 | 0.05 | 25 | T Cell |
| Cenpe         | 1.55 | 0.00 | 0.00 | 0.73 | 0.08 | 25 | T Cell |
| Incenp        | 1.54 | 0.00 | 0.00 | 0.73 | 0.08 | 25 | T Cell |
| Hmmr          | 1.52 | 0.00 | 0.00 | 0.61 | 0.04 | 25 | T Cell |
| Hist1h1b      | 1.50 | 0.00 | 0.00 | 0.49 | 0.04 | 25 | T Cell |
| Cd3g          | 1.49 | 0.00 | 0.00 | 0.65 | 0.03 | 25 | T Cell |
| Cdca8         | 1.44 | 0.00 | 0.00 | 0.66 | 0.05 | 25 | T Cell |
| Rrm2          | 1.41 | 0.00 | 0.00 | 0.58 | 0.05 | 25 | T Cell |
| RP23-45G16.5  | 1.40 | 0.00 | 0.00 | 0.64 | 0.05 | 25 | T Cell |
| Cd3d          | 1.39 | 0.00 | 0.00 | 0.58 | 0.03 | 25 | T Cell |
| Prc1          | 1.38 | 0.00 | 0.00 | 0.67 | 0.06 | 25 | T Cell |
| Nkg7          | 1.37 | 0.00 | 0.00 | 0.38 | 0.02 | 25 | T Cell |
| Ccnb2         | 1.37 | 0.00 | 0.00 | 0.67 | 0.06 | 25 | T Cell |
| Thy1          | 1.36 | 0.00 | 0.00 | 0.57 | 0.02 | 25 | T Cell |
| Ncapg         | 1.35 | 0.00 | 0.00 | 0.61 | 0.04 | 25 | T Cell |
| Ptpcap        | 1.35 | 0.00 | 0.00 | 0.77 | 0.07 | 25 | T Cell |
| Tpx2          | 1.26 | 0.00 | 0.00 | 0.61 | 0.05 | 25 | T Cell |
| Kif11         | 1.22 | 0.00 | 0.00 | 0.55 | 0.04 | 25 | T Cell |
| Esco2         | 1.22 | 0.00 | 0.00 | 0.49 | 0.03 | 25 | T Cell |
| Kif15         | 1.20 | 0.00 | 0.00 | 0.54 | 0.04 | 25 | T Cell |
| Ndc80         | 1.20 | 0.00 | 0.00 | 0.53 | 0.04 | 25 | T Cell |
| Skap1         | 1.18 | 0.00 | 0.00 | 0.53 | 0.02 | 25 | T Cell |
| Selplg        | 1.16 | 0.00 | 0.00 | 0.61 | 0.05 | 25 | T Cell |
| Cdca3         | 1.14 | 0.00 | 0.00 | 0.52 | 0.03 | 25 | T Cell |
| Asf1b         | 1.02 | 0.00 | 0.00 | 0.45 | 0.02 | 25 | T Cell |
| Bcl11b        | 1.00 | 0.00 | 0.00 | 0.38 | 0.02 | 25 | T Cell |
| Itgb7         | 0.97 | 0.00 | 0.00 | 0.49 | 0.03 | 25 | T Cell |
| Lck           | 0.97 | 0.00 | 0.00 | 0.43 | 0.02 | 25 | T Cell |
| Spn           | 0.94 | 0.00 | 0.00 | 0.45 | 0.03 | 25 | T Cell |
| Aurkb         | 0.88 | 0.00 | 0.00 | 0.41 | 0.03 | 25 | T Cell |
| Icos          | 0.87 | 0.00 | 0.00 | 0.28 | 0.01 | 25 | T Cell |
| Ctsw          | 0.77 | 0.00 | 0.00 | 0.29 | 0.01 | 25 | T Cell |
| Hist1h3c      | 0.75 | 0.00 | 0.00 | 0.32 | 0.01 | 25 | T Cell |

|             |      |      |      |      |      |    |        |
|-------------|------|------|------|------|------|----|--------|
| Cenpf       | 1.57 | 0.00 | 0.00 | 0.70 | 0.08 | 25 | T Cell |
| Fbxo5       | 1.16 | 0.00 | 0.00 | 0.54 | 0.04 | 25 | T Cell |
| Cd3e        | 0.73 | 0.00 | 0.00 | 0.31 | 0.01 | 25 | T Cell |
| Trac        | 0.75 | 0.00 | 0.00 | 0.25 | 0.01 | 25 | T Cell |
| Sept1       | 1.05 | 0.00 | 0.00 | 0.50 | 0.04 | 25 | T Cell |
| Lat         | 0.75 | 0.00 | 0.00 | 0.33 | 0.02 | 25 | T Cell |
| Mis18bp1    | 1.09 | 0.00 | 0.00 | 0.46 | 0.03 | 25 | T Cell |
| Klrd1       | 1.35 | 0.00 | 0.00 | 0.30 | 0.01 | 25 | T Cell |
| Ccna2       | 1.04 | 0.00 | 0.00 | 0.48 | 0.04 | 25 | T Cell |
| Casc5       | 1.17 | 0.00 | 0.00 | 0.53 | 0.04 | 25 | T Cell |
| Sgol1       | 0.90 | 0.00 | 0.00 | 0.42 | 0.03 | 25 | T Cell |
| Cks2        | 1.36 | 0.00 | 0.00 | 0.69 | 0.08 | 25 | T Cell |
| Smc2        | 1.60 | 0.00 | 0.00 | 0.87 | 0.13 | 25 | T Cell |
| Rac2        | 1.27 | 0.00 | 0.00 | 0.81 | 0.11 | 25 | T Cell |
| Clspn       | 1.22 | 0.00 | 0.00 | 0.49 | 0.04 | 25 | T Cell |
| Tacc3       | 1.22 | 0.00 | 0.00 | 0.56 | 0.05 | 25 | T Cell |
| Cenpa       | 1.33 | 0.00 | 0.00 | 0.60 | 0.06 | 25 | T Cell |
| Ccnb1       | 0.82 | 0.00 | 0.00 | 0.36 | 0.02 | 25 | T Cell |
| AW112010    | 1.57 | 0.00 | 0.00 | 0.48 | 0.04 | 25 | T Cell |
| Cdc20       | 1.18 | 0.00 | 0.00 | 0.51 | 0.05 | 25 | T Cell |
| Cep55       | 0.78 | 0.00 | 0.00 | 0.39 | 0.03 | 25 | T Cell |
| Ptpn7       | 0.81 | 0.00 | 0.00 | 0.38 | 0.03 | 25 | T Cell |
| Cd2         | 1.05 | 0.00 | 0.00 | 0.49 | 0.04 | 25 | T Cell |
| Racgap1     | 0.99 | 0.00 | 0.00 | 0.45 | 0.04 | 25 | T Cell |
| Dlgap5      | 0.89 | 0.00 | 0.00 | 0.36 | 0.03 | 25 | T Cell |
| Ska1        | 0.73 | 0.00 | 0.00 | 0.32 | 0.02 | 25 | T Cell |
| Aspm        | 1.01 | 0.00 | 0.00 | 0.40 | 0.03 | 25 | T Cell |
| Spc24       | 0.98 | 0.00 | 0.00 | 0.49 | 0.05 | 25 | T Cell |
| Bub1        | 0.76 | 0.00 | 0.00 | 0.35 | 0.03 | 25 | T Cell |
| Ptpnc       | 1.39 | 0.00 | 0.00 | 0.87 | 0.14 | 25 | T Cell |
| Sgol2       | 1.04 | 0.00 | 0.00 | 0.45 | 0.04 | 25 | T Cell |
| Nuf2        | 0.85 | 0.00 | 0.00 | 0.40 | 0.03 | 25 | T Cell |
| Kif23       | 1.01 | 0.00 | 0.00 | 0.52 | 0.05 | 25 | T Cell |
| Spc25       | 1.05 | 0.00 | 0.00 | 0.49 | 0.05 | 25 | T Cell |
| D17H6S56E-5 | 1.43 | 0.00 | 0.00 | 0.71 | 0.10 | 25 | T Cell |
| Ikzf2       | 0.80 | 0.00 | 0.00 | 0.31 | 0.02 | 25 | T Cell |
| Cenph       | 0.90 | 0.00 | 0.00 | 0.40 | 0.03 | 25 | T Cell |
| Kif22       | 0.85 | 0.00 | 0.00 | 0.34 | 0.02 | 25 | T Cell |
| Rad51       | 0.71 | 0.00 | 0.00 | 0.34 | 0.03 | 25 | T Cell |
| Cd52        | 1.49 | 0.00 | 0.00 | 0.96 | 0.20 | 25 | T Cell |
| Ncapd2      | 1.01 | 0.00 | 0.00 | 0.45 | 0.04 | 25 | T Cell |
| Cks1b       | 1.18 | 0.00 | 0.00 | 0.65 | 0.09 | 25 | T Cell |
| Plk1        | 0.60 | 0.00 | 0.00 | 0.27 | 0.02 | 25 | T Cell |

|               |      |      |      |      |      |    |        |
|---------------|------|------|------|------|------|----|--------|
| Cd247         | 0.64 | 0.00 | 0.00 | 0.26 | 0.01 | 25 | T Cell |
| Kif20b        | 1.19 | 0.00 | 0.00 | 0.54 | 0.07 | 25 | T Cell |
| Ckap2l        | 0.93 | 0.00 | 0.00 | 0.45 | 0.05 | 25 | T Cell |
| Lmnb1         | 1.16 | 0.00 | 0.00 | 0.61 | 0.08 | 25 | T Cell |
| Arhgap11a     | 0.94 | 0.00 | 0.00 | 0.43 | 0.04 | 25 | T Cell |
| Cenpl         | 0.68 | 0.00 | 0.00 | 0.32 | 0.02 | 25 | T Cell |
| Cdk1          | 1.01 | 0.00 | 0.00 | 0.47 | 0.05 | 25 | T Cell |
| Bin2          | 0.85 | 0.00 | 0.00 | 0.44 | 0.04 | 25 | T Cell |
| Mad2l1        | 0.70 | 0.00 | 0.00 | 0.32 | 0.02 | 25 | T Cell |
| Hmgb2         | 2.04 | 0.00 | 0.00 | 1.00 | 0.42 | 25 | T Cell |
| Tbc1d10c      | 0.65 | 0.00 | 0.00 | 0.35 | 0.03 | 25 | T Cell |
| Cd27          | 0.67 | 0.00 | 0.00 | 0.30 | 0.02 | 25 | T Cell |
| Ms4a6b        | 1.09 | 0.00 | 0.00 | 0.50 | 0.06 | 25 | T Cell |
| Hcst          | 0.72 | 0.00 | 0.00 | 0.39 | 0.04 | 25 | T Cell |
| Hist1h4i      | 0.59 | 0.00 | 0.00 | 0.30 | 0.02 | 25 | T Cell |
| Pycard        | 1.17 | 0.00 | 0.00 | 0.59 | 0.09 | 25 | T Cell |
| Cdca2         | 0.57 | 0.00 | 0.00 | 0.27 | 0.02 | 25 | T Cell |
| Diap3         | 0.82 | 0.00 | 0.00 | 0.48 | 0.06 | 25 | T Cell |
| Arhgdib       | 1.11 | 0.00 | 0.00 | 0.80 | 0.16 | 25 | T Cell |
| Dnajc9        | 1.16 | 0.00 | 0.00 | 0.67 | 0.12 | 25 | T Cell |
| Depdc1a       | 0.66 | 0.00 | 0.00 | 0.26 | 0.02 | 25 | T Cell |
| Knstrn        | 0.85 | 0.00 | 0.00 | 0.37 | 0.04 | 25 | T Cell |
| C330027C09Rik | 0.66 | 0.00 | 0.00 | 0.32 | 0.03 | 25 | T Cell |
| Phgdh         | 0.61 | 0.00 | 0.00 | 0.29 | 0.02 | 25 | T Cell |
| Gm10184       | 1.06 | 0.00 | 0.00 | 0.48 | 0.06 | 25 | T Cell |
| Trim59        | 0.82 | 0.00 | 0.00 | 0.39 | 0.04 | 25 | T Cell |
| Gmnn          | 0.98 | 0.00 | 0.00 | 0.50 | 0.07 | 25 | T Cell |
| Gata3         | 0.75 | 0.00 | 0.00 | 0.28 | 0.02 | 25 | T Cell |
| Rrm1          | 0.88 | 0.00 | 0.00 | 0.48 | 0.06 | 25 | T Cell |
| Gm10259       | 0.92 | 0.00 | 0.00 | 0.46 | 0.06 | 25 | T Cell |
| Tyms          | 0.93 | 0.00 | 0.00 | 0.44 | 0.05 | 25 | T Cell |
| Iqgap2        | 0.75 | 0.00 | 0.00 | 0.37 | 0.04 | 25 | T Cell |
| Cd48          | 0.78 | 0.00 | 0.00 | 0.41 | 0.05 | 25 | T Cell |
| Sept6         | 0.82 | 0.00 | 0.00 | 0.49 | 0.07 | 25 | T Cell |
| Ikzf3         | 0.58 | 0.00 | 0.00 | 0.27 | 0.02 | 25 | T Cell |
| Was           | 0.71 | 0.00 | 0.00 | 0.43 | 0.05 | 25 | T Cell |
| Kpna2         | 0.92 | 0.00 | 0.00 | 0.45 | 0.06 | 25 | T Cell |
| Ezh2          | 1.23 | 0.00 | 0.00 | 0.78 | 0.19 | 25 | T Cell |
| Dut           | 1.01 | 0.00 | 0.00 | 0.54 | 0.09 | 25 | T Cell |
| Rad51ap1      | 0.73 | 0.00 | 0.00 | 0.33 | 0.03 | 25 | T Cell |
| Kif4          | 0.67 | 0.00 | 0.00 | 0.28 | 0.03 | 25 | T Cell |
| Dnmt1         | 1.03 | 0.00 | 0.00 | 0.59 | 0.10 | 25 | T Cell |
| Stmn1         | 1.22 | 0.00 | 0.00 | 0.87 | 0.23 | 25 | T Cell |

|            |      |      |      |      |      |    |        |
|------------|------|------|------|------|------|----|--------|
| Bub1b      | 0.67 | 0.00 | 0.00 | 0.27 | 0.02 | 25 | T Cell |
| Il2rg      | 0.84 | 0.00 | 0.00 | 0.58 | 0.10 | 25 | T Cell |
| Kif20a     | 0.60 | 0.00 | 0.00 | 0.26 | 0.02 | 25 | T Cell |
| Mns1       | 0.80 | 0.00 | 0.00 | 0.36 | 0.04 | 25 | T Cell |
| Smc4       | 1.52 | 0.00 | 0.00 | 0.94 | 0.34 | 25 | T Cell |
| Prim1      | 0.81 | 0.00 | 0.00 | 0.41 | 0.05 | 25 | T Cell |
| Il7r       | 0.76 | 0.00 | 0.00 | 0.28 | 0.03 | 25 | T Cell |
| Dbf4       | 0.78 | 0.00 | 0.00 | 0.40 | 0.05 | 25 | T Cell |
| Epsti1     | 0.83 | 0.00 | 0.00 | 0.35 | 0.04 | 25 | T Cell |
| Coro1a     | 0.90 | 0.00 | 0.00 | 0.57 | 0.10 | 25 | T Cell |
| Al662270   | 0.81 | 0.00 | 0.00 | 0.48 | 0.07 | 25 | T Cell |
| Rbm38      | 0.59 | 0.00 | 0.00 | 0.30 | 0.03 | 25 | T Cell |
| Psmb8      | 1.02 | 0.00 | 0.00 | 0.78 | 0.18 | 25 | T Cell |
| H2afz      | 1.41 | 0.00 | 0.00 | 0.95 | 0.40 | 25 | T Cell |
| Spdl1      | 0.64 | 0.00 | 0.00 | 0.25 | 0.02 | 25 | T Cell |
| Lcp1       | 1.11 | 0.00 | 0.00 | 0.85 | 0.22 | 25 | T Cell |
| Hist1h1e   | 1.55 | 0.00 | 0.00 | 0.70 | 0.16 | 25 | T Cell |
| Fgl2       | 0.79 | 0.00 | 0.00 | 0.33 | 0.04 | 25 | T Cell |
| Anp32e     | 1.24 | 0.00 | 0.00 | 0.90 | 0.28 | 25 | T Cell |
| Tk1        | 0.57 | 0.00 | 0.00 | 0.31 | 0.03 | 25 | T Cell |
| Ikzf1      | 0.58 | 0.00 | 0.00 | 0.32 | 0.04 | 25 | T Cell |
| Pbk        | 0.55 | 0.00 | 0.00 | 0.30 | 0.03 | 25 | T Cell |
| Fam107b    | 0.81 | 0.00 | 0.00 | 0.45 | 0.07 | 25 | T Cell |
| Laptm5     | 0.73 | 0.00 | 0.00 | 0.68 | 0.13 | 25 | T Cell |
| Hist2h2ac  | 0.89 | 0.00 | 0.00 | 0.42 | 0.06 | 25 | T Cell |
| Cenpw      | 0.65 | 0.00 | 0.00 | 0.37 | 0.05 | 25 | T Cell |
| Hist1h1d   | 1.30 | 0.00 | 0.00 | 0.53 | 0.10 | 25 | T Cell |
| Cenpk      | 0.72 | 0.00 | 0.00 | 0.31 | 0.04 | 25 | T Cell |
| Lig1       | 1.08 | 0.00 | 0.00 | 0.52 | 0.09 | 25 | T Cell |
| Ncapg2     | 0.53 | 0.00 | 0.00 | 0.28 | 0.03 | 25 | T Cell |
| Mcm5       | 0.65 | 0.00 | 0.00 | 0.31 | 0.04 | 25 | T Cell |
| Atad2      | 0.92 | 0.00 | 0.00 | 0.47 | 0.08 | 25 | T Cell |
| Ckap2      | 0.62 | 0.00 | 0.00 | 0.35 | 0.04 | 25 | T Cell |
| Arhgap9    | 0.59 | 0.00 | 0.00 | 0.32 | 0.04 | 25 | T Cell |
| Rfc4       | 0.52 | 0.00 | 0.00 | 0.31 | 0.04 | 25 | T Cell |
| Cdc25b     | 0.72 | 0.00 | 0.00 | 0.34 | 0.04 | 25 | T Cell |
| Def6       | 0.52 | 0.00 | 0.00 | 0.26 | 0.03 | 25 | T Cell |
| Ms4a4c     | 0.68 | 0.00 | 0.00 | 0.29 | 0.03 | 25 | T Cell |
| Hist2h2aa2 | 1.05 | 0.00 | 0.00 | 0.60 | 0.14 | 25 | T Cell |
| Ccr7       | 0.97 | 0.00 | 0.00 | 0.25 | 0.03 | 25 | T Cell |
| Sell       | 0.79 | 0.00 | 0.00 | 0.31 | 0.04 | 25 | T Cell |
| Coro2a     | 0.87 | 0.00 | 0.00 | 0.41 | 0.06 | 25 | T Cell |
| Pcna-ps2   | 1.32 | 0.00 | 0.00 | 0.67 | 0.18 | 25 | T Cell |

|           |      |      |      |      |      |    |        |
|-----------|------|------|------|------|------|----|--------|
| Arhgap15  | 0.66 | 0.00 | 0.00 | 0.35 | 0.05 | 25 | T Cell |
| Cd53      | 0.72 | 0.00 | 0.00 | 0.51 | 0.09 | 25 | T Cell |
| Gimap9    | 0.82 | 0.00 | 0.00 | 0.43 | 0.07 | 25 | T Cell |
| Cotl1     | 0.97 | 0.00 | 0.00 | 0.69 | 0.17 | 25 | T Cell |
| Cytip     | 0.81 | 0.00 | 0.00 | 0.50 | 0.09 | 25 | T Cell |
| Ptma      | 0.84 | 0.00 | 0.00 | 1.00 | 0.91 | 25 | T Cell |
| Lbr       | 0.88 | 0.00 | 0.00 | 0.56 | 0.12 | 25 | T Cell |
| Mthfd2    | 0.55 | 0.00 | 0.00 | 0.26 | 0.03 | 25 | T Cell |
| Tubb5     | 1.10 | 0.00 | 0.00 | 0.94 | 0.44 | 25 | T Cell |
| Itgb2     | 0.51 | 0.00 | 0.00 | 0.33 | 0.04 | 25 | T Cell |
| Plk4      | 0.60 | 0.00 | 0.00 | 0.31 | 0.04 | 25 | T Cell |
| Lef1      | 0.65 | 0.00 | 0.00 | 0.30 | 0.04 | 25 | T Cell |
| Camk4     | 0.64 | 0.00 | 0.00 | 0.29 | 0.04 | 25 | T Cell |
| Fen1      | 0.57 | 0.00 | 0.00 | 0.30 | 0.04 | 25 | T Cell |
| Pcna      | 1.28 | 0.00 | 0.00 | 0.64 | 0.18 | 25 | T Cell |
| Mcm6      | 0.73 | 0.00 | 0.00 | 0.41 | 0.07 | 25 | T Cell |
| Traf3ip3  | 0.52 | 0.00 | 0.00 | 0.28 | 0.03 | 25 | T Cell |
| Hist2h2ab | 0.72 | 0.00 | 0.00 | 0.30 | 0.04 | 25 | T Cell |
| Nucks1    | 1.03 | 0.00 | 0.00 | 0.83 | 0.28 | 25 | T Cell |
| Tuba1b    | 1.08 | 0.00 | 0.00 | 0.94 | 0.45 | 25 | T Cell |
| Slbp      | 1.04 | 0.00 | 0.00 | 0.59 | 0.15 | 25 | T Cell |
| Cdc7      | 0.50 | 0.00 | 0.00 | 0.25 | 0.03 | 25 | T Cell |
| Ran       | 1.04 | 0.00 | 0.00 | 0.91 | 0.38 | 25 | T Cell |
| Mcm3      | 0.65 | 0.00 | 0.00 | 0.41 | 0.07 | 25 | T Cell |
| Apobec3   | 0.75 | 0.00 | 0.00 | 0.43 | 0.08 | 25 | T Cell |
| Stk10     | 0.50 | 0.00 | 0.00 | 0.32 | 0.05 | 25 | T Cell |
| S1pr4     | 0.61 | 0.00 | 0.00 | 0.29 | 0.04 | 25 | T Cell |
| Cdkn2d    | 0.77 | 0.00 | 0.00 | 0.39 | 0.07 | 25 | T Cell |
| Ddx39     | 0.67 | 0.00 | 0.00 | 0.46 | 0.09 | 25 | T Cell |
| Gm10282   | 1.00 | 0.00 | 0.00 | 0.91 | 0.40 | 25 | T Cell |
| Lcp2      | 0.56 | 0.00 | 0.00 | 0.26 | 0.03 | 25 | T Cell |
| Fermt3    | 0.56 | 0.00 | 0.00 | 0.37 | 0.06 | 25 | T Cell |
| Pola1     | 0.65 | 0.00 | 0.00 | 0.30 | 0.04 | 25 | T Cell |
| Psmb9     | 0.71 | 0.00 | 0.00 | 0.45 | 0.09 | 25 | T Cell |
| Nrm       | 0.58 | 0.00 | 0.00 | 0.34 | 0.05 | 25 | T Cell |
| Ltb       | 0.47 | 0.00 | 0.00 | 0.27 | 0.03 | 25 | T Cell |
| Limd2     | 0.83 | 0.00 | 0.00 | 0.60 | 0.15 | 25 | T Cell |
| S100a4    | 0.95 | 0.00 | 0.00 | 0.38 | 0.07 | 25 | T Cell |
| Ccdc34    | 0.71 | 0.00 | 0.00 | 0.58 | 0.14 | 25 | T Cell |
| Anp32b    | 1.01 | 0.00 | 0.00 | 0.94 | 0.50 | 25 | T Cell |
| Hmgn2     | 0.99 | 0.00 | 0.00 | 0.91 | 0.43 | 25 | T Cell |
| Dek       | 1.09 | 0.00 | 0.00 | 0.94 | 0.50 | 25 | T Cell |
| Sh3bgrl3  | 0.92 | 0.00 | 0.00 | 0.87 | 0.34 | 25 | T Cell |

|               |      |      |      |      |      |    |        |
|---------------|------|------|------|------|------|----|--------|
| H2-K1         | 1.02 | 0.00 | 0.00 | 0.86 | 0.32 | 25 | T Cell |
| Gmfg          | 0.72 | 0.00 | 0.00 | 0.57 | 0.14 | 25 | T Cell |
| Rangap1       | 0.68 | 0.00 | 0.00 | 0.41 | 0.08 | 25 | T Cell |
| Mcm7          | 0.73 | 0.00 | 0.00 | 0.38 | 0.07 | 25 | T Cell |
| Apbb1ip       | 0.58 | 0.00 | 0.00 | 0.46 | 0.09 | 25 | T Cell |
| Ckap5         | 0.75 | 0.00 | 0.00 | 0.50 | 0.11 | 25 | T Cell |
| Tcf7          | 0.91 | 0.00 | 0.00 | 0.35 | 0.06 | 25 | T Cell |
| Hells         | 0.65 | 0.00 | 0.00 | 0.34 | 0.06 | 25 | T Cell |
| Sh3kbp1       | 0.78 | 0.00 | 0.00 | 0.48 | 0.10 | 25 | T Cell |
| Ptpn18        | 0.64 | 0.00 | 0.00 | 0.59 | 0.14 | 25 | T Cell |
| Hist1h1c      | 1.00 | 0.00 | 0.00 | 0.48 | 0.11 | 25 | T Cell |
| Lrmp          | 0.49 | 0.00 | 0.00 | 0.26 | 0.03 | 25 | T Cell |
| Hn1           | 0.81 | 0.00 | 0.00 | 0.67 | 0.20 | 25 | T Cell |
| Ifi47         | 0.62 | 0.00 | 0.00 | 0.32 | 0.05 | 25 | T Cell |
| Haus3         | 0.56 | 0.00 | 0.00 | 0.29 | 0.04 | 25 | T Cell |
| Psat1         | 0.49 | 0.00 | 0.00 | 0.26 | 0.03 | 25 | T Cell |
| Ncaph         | 0.55 | 0.00 | 0.00 | 0.29 | 0.05 | 25 | T Cell |
| Me2           | 0.60 | 0.00 | 0.00 | 0.38 | 0.07 | 25 | T Cell |
| Actb          | 0.74 | 0.00 | 0.00 | 1.00 | 0.98 | 25 | T Cell |
| Hcls1         | 0.48 | 0.00 | 0.00 | 0.40 | 0.07 | 25 | T Cell |
| Fnbp1         | 0.69 | 0.00 | 0.00 | 0.42 | 0.09 | 25 | T Cell |
| Cit           | 0.56 | 0.00 | 0.00 | 0.29 | 0.05 | 25 | T Cell |
| Stk17b        | 0.53 | 0.00 | 0.00 | 0.35 | 0.06 | 25 | T Cell |
| Tmpo          | 0.87 | 0.00 | 0.00 | 0.57 | 0.15 | 25 | T Cell |
| Arl6ip1       | 1.31 | 0.00 | 0.00 | 0.93 | 0.52 | 25 | T Cell |
| Eri1          | 0.49 | 0.00 | 0.00 | 0.33 | 0.06 | 25 | T Cell |
| Myo1g         | 0.44 | 0.00 | 0.00 | 0.26 | 0.04 | 25 | T Cell |
| Fyb           | 0.76 | 0.00 | 0.00 | 0.64 | 0.18 | 25 | T Cell |
| Pmf1          | 0.49 | 0.00 | 0.00 | 0.28 | 0.04 | 25 | T Cell |
| Gimap4        | 0.82 | 0.00 | 0.00 | 0.63 | 0.17 | 25 | T Cell |
| Tuba1c        | 0.94 | 0.00 | 0.00 | 0.80 | 0.32 | 25 | T Cell |
| Sp110         | 0.50 | 0.00 | 0.00 | 0.38 | 0.07 | 25 | T Cell |
| 2700094K13Rik | 0.76 | 0.00 | 0.00 | 0.58 | 0.16 | 25 | T Cell |
| Emp3          | 0.75 | 0.00 | 0.00 | 0.69 | 0.21 | 25 | T Cell |
| Shisa5        | 0.83 | 0.00 | 0.00 | 0.66 | 0.20 | 25 | T Cell |
| Rad21         | 0.88 | 0.00 | 0.00 | 0.70 | 0.23 | 25 | T Cell |
| Sp100         | 0.70 | 0.00 | 0.00 | 0.40 | 0.08 | 25 | T Cell |
| Tes           | 0.64 | 0.00 | 0.00 | 0.43 | 0.10 | 25 | T Cell |
| A430104N18Rik | 0.51 | 0.00 | 0.00 | 0.35 | 0.06 | 25 | T Cell |
| Lrrc58        | 0.76 | 0.00 | 0.00 | 0.99 | 0.91 | 25 | T Cell |
| Fam111a       | 0.67 | 0.00 | 0.00 | 0.56 | 0.15 | 25 | T Cell |
| B2m           | 0.79 | 0.00 | 0.00 | 0.98 | 0.67 | 25 | T Cell |
| Lsp1          | 0.54 | 0.00 | 0.00 | 0.67 | 0.19 | 25 | T Cell |

|               |      |      |      |      |      |    |        |
|---------------|------|------|------|------|------|----|--------|
| Smchd1        | 0.73 | 0.00 | 0.00 | 0.57 | 0.16 | 25 | T Cell |
| Hmha1         | 0.51 | 0.00 | 0.00 | 0.39 | 0.08 | 25 | T Cell |
| Actr3         | 0.88 | 0.00 | 0.00 | 0.81 | 0.33 | 25 | T Cell |
| Rpsa-ps10     | 0.75 | 0.00 | 0.00 | 0.96 | 0.68 | 25 | T Cell |
| Pim1          | 0.70 | 0.00 | 0.00 | 0.41 | 0.09 | 25 | T Cell |
| Nasp          | 0.84 | 0.00 | 0.00 | 0.62 | 0.20 | 25 | T Cell |
| Arhgap30      | 0.53 | 0.00 | 0.00 | 0.44 | 0.10 | 25 | T Cell |
| Exosc8        | 0.54 | 0.00 | 0.00 | 0.38 | 0.08 | 25 | T Cell |
| Hjurp         | 0.69 | 0.00 | 0.00 | 0.53 | 0.14 | 25 | T Cell |
| Lgals1        | 0.75 | 0.00 | 0.00 | 0.93 | 0.41 | 25 | T Cell |
| Ncapd3        | 0.61 | 0.00 | 0.00 | 0.30 | 0.06 | 25 | T Cell |
| Gm10123       | 0.68 | 0.00 | 0.00 | 0.96 | 0.81 | 25 | T Cell |
| Fxyd5         | 0.64 | 0.00 | 0.00 | 0.60 | 0.18 | 25 | T Cell |
| Hirip3        | 0.58 | 0.00 | 0.00 | 0.39 | 0.09 | 25 | T Cell |
| Rpa1          | 0.45 | 0.00 | 0.00 | 0.29 | 0.05 | 25 | T Cell |
| Tmsb4x        | 0.67 | 0.00 | 0.00 | 0.99 | 0.89 | 25 | T Cell |
| Ppil1         | 0.52 | 0.00 | 0.00 | 0.29 | 0.05 | 25 | T Cell |
| Pfn1          | 0.84 | 0.00 | 0.00 | 0.87 | 0.46 | 25 | T Cell |
| Fkbp3         | 0.74 | 0.00 | 0.00 | 0.78 | 0.30 | 25 | T Cell |
| Srpk1         | 0.64 | 0.00 | 0.00 | 0.47 | 0.12 | 25 | T Cell |
| Itgal         | 0.31 | 0.00 | 0.00 | 0.25 | 0.04 | 25 | T Cell |
| Cmc2          | 0.55 | 0.00 | 0.00 | 0.28 | 0.05 | 25 | T Cell |
| Atad5         | 0.57 | 0.00 | 0.00 | 0.29 | 0.05 | 25 | T Cell |
| Ska2          | 0.55 | 0.00 | 0.00 | 0.32 | 0.07 | 25 | T Cell |
| Gm5506        | 0.60 | 0.00 | 0.00 | 0.51 | 0.14 | 25 | T Cell |
| Tipin         | 0.55 | 0.00 | 0.00 | 0.41 | 0.10 | 25 | T Cell |
| Ncbp1         | 0.47 | 0.00 | 0.00 | 0.29 | 0.06 | 25 | T Cell |
| Dnajc15       | 0.55 | 0.00 | 0.00 | 0.36 | 0.08 | 25 | T Cell |
| Pyhin1        | 0.66 | 0.00 | 0.00 | 0.27 | 0.05 | 25 | T Cell |
| Crip1         | 0.80 | 0.00 | 0.00 | 0.92 | 0.47 | 25 | T Cell |
| Tubb4b        | 0.61 | 0.00 | 0.00 | 0.59 | 0.19 | 25 | T Cell |
| Mcm4          | 0.54 | 0.00 | 0.00 | 0.29 | 0.06 | 25 | T Cell |
| Usp1          | 0.68 | 0.00 | 0.00 | 0.53 | 0.15 | 25 | T Cell |
| 2700029M09Rik | 0.71 | 0.00 | 0.00 | 0.46 | 0.13 | 25 | T Cell |
| Sfxn1         | 0.44 | 0.00 | 0.00 | 0.33 | 0.07 | 25 | T Cell |
| Ccr2          | 0.64 | 0.00 | 0.00 | 0.34 | 0.07 | 25 | T Cell |
| Esyt1         | 0.47 | 0.00 | 0.00 | 0.32 | 0.07 | 25 | T Cell |
| Ldha          | 0.77 | 0.00 | 0.00 | 0.72 | 0.29 | 25 | T Cell |
| Slfn2         | 0.52 | 0.00 | 0.00 | 0.49 | 0.13 | 25 | T Cell |
| Cdca4         | 0.48 | 0.00 | 0.00 | 0.27 | 0.05 | 25 | T Cell |
| Pgk1          | 0.59 | 0.00 | 0.00 | 0.43 | 0.11 | 25 | T Cell |
| Rnaseh2b      | 0.50 | 0.00 | 0.00 | 0.36 | 0.08 | 25 | T Cell |
| Snrpd1        | 0.65 | 0.00 | 0.00 | 0.61 | 0.20 | 25 | T Cell |

|           |      |      |      |      |      |    |        |
|-----------|------|------|------|------|------|----|--------|
| Eno1      | 0.66 | 0.00 | 0.00 | 0.53 | 0.16 | 25 | T Cell |
| Sec11c    | 0.67 | 0.00 | 0.00 | 0.56 | 0.18 | 25 | T Cell |
| S100a10   | 1.07 | 0.00 | 0.00 | 0.80 | 0.38 | 25 | T Cell |
| Acot7     | 0.40 | 0.00 | 0.00 | 0.31 | 0.06 | 25 | T Cell |
| Gimap1    | 0.50 | 0.00 | 0.00 | 0.50 | 0.14 | 25 | T Cell |
| Dgka      | 0.61 | 0.00 | 0.00 | 0.27 | 0.05 | 25 | T Cell |
| Emb       | 0.67 | 0.00 | 0.00 | 0.42 | 0.11 | 25 | T Cell |
| Cdk2ap2   | 0.57 | 0.00 | 0.00 | 0.52 | 0.15 | 25 | T Cell |
| Banf1     | 0.74 | 0.00 | 0.00 | 0.71 | 0.28 | 25 | T Cell |
| Ppia      | 0.67 | 0.00 | 0.00 | 0.97 | 0.80 | 25 | T Cell |
| Uchl5     | 0.59 | 0.00 | 0.00 | 0.43 | 0.11 | 25 | T Cell |
| Nudt21    | 0.53 | 0.00 | 0.00 | 0.45 | 0.12 | 25 | T Cell |
| Mbnl1     | 0.71 | 0.00 | 0.00 | 0.68 | 0.27 | 25 | T Cell |
| Topbp1    | 0.46 | 0.00 | 0.00 | 0.27 | 0.05 | 25 | T Cell |
| Rpsa      | 0.67 | 0.00 | 0.00 | 0.94 | 0.62 | 25 | T Cell |
| Vars      | 0.46 | 0.00 | 0.00 | 0.34 | 0.08 | 25 | T Cell |
| Rbm3      | 0.75 | 0.00 | 0.00 | 0.83 | 0.41 | 25 | T Cell |
| Rplp0     | 0.56 | 0.00 | 0.00 | 0.99 | 0.83 | 25 | T Cell |
| H2-Q7     | 0.69 | 0.00 | 0.00 | 0.32 | 0.07 | 25 | T Cell |
| H2-D1     | 0.75 | 0.00 | 0.00 | 0.91 | 0.49 | 25 | T Cell |
| Leptrotl1 | 0.60 | 0.00 | 0.00 | 0.49 | 0.15 | 25 | T Cell |
| Cenpc1    | 0.55 | 0.00 | 0.00 | 0.36 | 0.09 | 25 | T Cell |
| G2e3      | 0.46 | 0.00 | 0.00 | 0.30 | 0.06 | 25 | T Cell |
| Ets1      | 0.59 | 0.00 | 0.00 | 0.69 | 0.25 | 25 | T Cell |
| Dtymk     | 0.57 | 0.00 | 0.00 | 0.46 | 0.13 | 25 | T Cell |
| Hat1      | 0.49 | 0.00 | 0.00 | 0.32 | 0.07 | 25 | T Cell |
| Gm8730    | 0.55 | 0.00 | 0.00 | 0.98 | 0.82 | 25 | T Cell |
| Rps26     | 0.51 | 0.00 | 0.00 | 0.99 | 0.90 | 25 | T Cell |
| Gm17087   | 0.68 | 0.00 | 0.00 | 0.63 | 0.24 | 25 | T Cell |
| Tpm3-rs7  | 0.62 | 0.00 | 0.00 | 0.97 | 0.69 | 25 | T Cell |
| Cep57     | 0.51 | 0.00 | 0.00 | 0.40 | 0.11 | 25 | T Cell |
| Ssrp1     | 0.63 | 0.00 | 0.00 | 0.59 | 0.21 | 25 | T Cell |
| Snrpe     | 0.66 | 0.00 | 0.00 | 0.78 | 0.36 | 25 | T Cell |
| Lsm3      | 0.44 | 0.00 | 0.00 | 0.40 | 0.11 | 25 | T Cell |
| Nfyb      | 0.54 | 0.00 | 0.00 | 0.42 | 0.12 | 25 | T Cell |
| Pabpc1    | 0.57 | 0.00 | 0.00 | 0.99 | 0.81 | 25 | T Cell |
| Pgk1-rs7  | 0.53 | 0.00 | 0.00 | 0.38 | 0.10 | 25 | T Cell |
| Ifi203    | 0.57 | 0.00 | 0.00 | 0.48 | 0.14 | 25 | T Cell |
| Ppp1r18   | 0.44 | 0.00 | 0.00 | 0.29 | 0.06 | 25 | T Cell |
| Gm6625    | 0.64 | 0.00 | 0.00 | 0.65 | 0.25 | 25 | T Cell |
| Bub3      | 0.54 | 0.00 | 0.00 | 0.46 | 0.14 | 25 | T Cell |
| Ctcf      | 0.60 | 0.00 | 0.00 | 0.63 | 0.23 | 25 | T Cell |
| Cep110    | 0.59 | 0.00 | 0.00 | 0.54 | 0.19 | 25 | T Cell |

|           |      |      |      |      |      |    |        |
|-----------|------|------|------|------|------|----|--------|
| Hprt      | 0.62 | 0.00 | 0.00 | 0.44 | 0.14 | 25 | T Cell |
| Hnrnpf    | 0.63 | 0.00 | 0.00 | 0.77 | 0.34 | 25 | T Cell |
| Rpa3      | 0.53 | 0.00 | 0.00 | 0.43 | 0.13 | 25 | T Cell |
| Gm10068   | 0.64 | 0.00 | 0.00 | 0.71 | 0.30 | 25 | T Cell |
| H2afv     | 0.81 | 0.00 | 0.00 | 0.67 | 0.28 | 25 | T Cell |
| Mif       | 0.63 | 0.00 | 0.00 | 0.54 | 0.19 | 25 | T Cell |
| Fam49b    | 0.50 | 0.00 | 0.00 | 0.39 | 0.11 | 25 | T Cell |
| Arrb2     | 0.37 | 0.00 | 0.00 | 0.29 | 0.07 | 25 | T Cell |
| Gm8991    | 0.72 | 0.00 | 0.00 | 0.59 | 0.23 | 25 | T Cell |
| Itga4     | 0.62 | 0.00 | 0.00 | 0.36 | 0.10 | 25 | T Cell |
| Gm5641    | 0.76 | 0.00 | 0.00 | 0.75 | 0.36 | 25 | T Cell |
| Cenpq     | 0.49 | 0.00 | 0.00 | 0.29 | 0.07 | 25 | T Cell |
| Gm6793    | 0.65 | 0.00 | 0.00 | 0.69 | 0.30 | 25 | T Cell |
| Pbdc1     | 0.52 | 0.00 | 0.00 | 0.43 | 0.13 | 25 | T Cell |
| Mrpl18    | 0.64 | 0.00 | 0.00 | 0.56 | 0.21 | 25 | T Cell |
| Tpm3      | 0.58 | 0.00 | 0.00 | 0.97 | 0.70 | 25 | T Cell |
| Elf1      | 0.59 | 0.00 | 0.00 | 0.57 | 0.20 | 25 | T Cell |
| Hnrnpa2b1 | 0.59 | 0.00 | 0.00 | 0.96 | 0.72 | 25 | T Cell |
| Samsn1    | 0.50 | 0.00 | 0.00 | 0.29 | 0.07 | 25 | T Cell |
| Wipf1     | 0.47 | 0.00 | 0.00 | 0.36 | 0.10 | 25 | T Cell |
| Rps11     | 0.53 | 0.00 | 0.00 | 0.96 | 0.76 | 25 | T Cell |
| Smc1a     | 0.62 | 0.00 | 0.00 | 0.76 | 0.35 | 25 | T Cell |
| Serbp1    | 0.60 | 0.00 | 0.00 | 0.96 | 0.75 | 25 | T Cell |
| Lsm5      | 0.50 | 0.00 | 0.00 | 0.40 | 0.12 | 25 | T Cell |
| Cbx3      | 0.67 | 0.00 | 0.00 | 0.72 | 0.34 | 25 | T Cell |
| Calm3     | 0.60 | 0.00 | 0.00 | 0.54 | 0.19 | 25 | T Cell |
| Pkm       | 0.62 | 0.00 | 0.00 | 0.57 | 0.22 | 25 | T Cell |
| Lsm4      | 0.56 | 0.00 | 0.00 | 0.56 | 0.20 | 25 | T Cell |
| Rps26-ps1 | 0.50 | 0.00 | 0.00 | 0.99 | 0.87 | 25 | T Cell |
| Anp32a    | 0.57 | 0.00 | 0.00 | 0.95 | 0.60 | 25 | T Cell |
| Srsf7     | 0.54 | 0.00 | 0.00 | 0.47 | 0.16 | 25 | T Cell |
| Rplp1     | 0.46 | 0.00 | 0.00 | 0.99 | 0.90 | 25 | T Cell |
| Mndal     | 0.47 | 0.00 | 0.00 | 0.50 | 0.16 | 25 | T Cell |
| Gapdh     | 0.49 | 0.00 | 0.00 | 0.44 | 0.14 | 25 | T Cell |
| Rbbp4     | 0.51 | 0.00 | 0.00 | 0.56 | 0.20 | 25 | T Cell |
| Ifi27l2a  | 0.82 | 0.00 | 0.00 | 0.34 | 0.09 | 25 | T Cell |
| Uchl3     | 0.37 | 0.00 | 0.00 | 0.28 | 0.07 | 25 | T Cell |
| Rad50     | 0.50 | 0.00 | 0.00 | 0.54 | 0.19 | 25 | T Cell |
| Psip1     | 0.53 | 0.00 | 0.00 | 0.46 | 0.15 | 25 | T Cell |
| Gm9242    | 0.68 | 0.00 | 0.00 | 0.58 | 0.24 | 25 | T Cell |
| Hmga1     | 0.40 | 0.00 | 0.00 | 0.30 | 0.08 | 25 | T Cell |
| Nubp1     | 0.43 | 0.00 | 0.00 | 0.26 | 0.06 | 25 | T Cell |
| Zc3hav1   | 0.41 | 0.00 | 0.00 | 0.30 | 0.08 | 25 | T Cell |

|           |      |      |      |      |      |    |        |
|-----------|------|------|------|------|------|----|--------|
| Nop58     | 0.65 | 0.00 | 0.00 | 0.62 | 0.26 | 25 | T Cell |
| Cbx5      | 0.59 | 0.00 | 0.00 | 0.64 | 0.26 | 25 | T Cell |
| Whsc1     | 0.53 | 0.00 | 0.00 | 0.42 | 0.14 | 25 | T Cell |
| Capza1    | 0.44 | 0.00 | 0.00 | 0.40 | 0.12 | 25 | T Cell |
| Sept11    | 0.55 | 0.00 | 0.00 | 0.58 | 0.22 | 25 | T Cell |
| Pa2g4     | 0.69 | 0.00 | 0.00 | 0.61 | 0.26 | 25 | T Cell |
| Gm12355   | 0.54 | 0.00 | 0.00 | 0.63 | 0.26 | 25 | T Cell |
| Hmgb1     | 0.63 | 0.00 | 0.00 | 0.89 | 0.61 | 25 | T Cell |
| Snrpf     | 0.58 | 0.00 | 0.00 | 0.65 | 0.28 | 25 | T Cell |
| Tmem71    | 0.42 | 0.00 | 0.00 | 0.26 | 0.06 | 25 | T Cell |
| Mdh1      | 0.51 | 0.00 | 0.00 | 0.51 | 0.19 | 25 | T Cell |
| Gm12728   | 0.47 | 0.00 | 0.00 | 0.48 | 0.17 | 25 | T Cell |
| Suz12     | 0.43 | 0.00 | 0.00 | 0.41 | 0.13 | 25 | T Cell |
| Atp1b3    | 0.61 | 0.00 | 0.00 | 0.61 | 0.25 | 25 | T Cell |
| Jak1      | 0.53 | 0.00 | 0.00 | 0.63 | 0.25 | 25 | T Cell |
| Dnajc2    | 0.50 | 0.00 | 0.00 | 0.53 | 0.20 | 25 | T Cell |
| Gm10275   | 0.49 | 0.00 | 0.00 | 0.93 | 0.66 | 25 | T Cell |
| Rpl4      | 0.45 | 0.00 | 0.00 | 0.97 | 0.83 | 25 | T Cell |
| Bzw2      | 0.53 | 0.00 | 0.00 | 0.43 | 0.15 | 25 | T Cell |
| Clic1     | 0.58 | 0.00 | 0.00 | 0.76 | 0.38 | 25 | T Cell |
| Supt16    | 0.59 | 0.00 | 0.00 | 0.59 | 0.25 | 25 | T Cell |
| Gm8186    | 0.59 | 0.00 | 0.00 | 0.75 | 0.39 | 25 | T Cell |
| Rpl14     | 0.44 | 0.00 | 0.00 | 0.98 | 0.84 | 25 | T Cell |
| Crlf3     | 0.45 | 0.00 | 0.00 | 0.41 | 0.14 | 25 | T Cell |
| Ubash3b   | 0.37 | 0.00 | 0.00 | 0.27 | 0.07 | 25 | T Cell |
| Hmgn5     | 0.57 | 0.00 | 0.00 | 0.62 | 0.26 | 25 | T Cell |
| Srgn      | 0.42 | 0.00 | 0.00 | 0.77 | 0.33 | 25 | T Cell |
| Srsf3     | 0.57 | 0.00 | 0.00 | 0.85 | 0.44 | 25 | T Cell |
| Rbbp7     | 0.58 | 0.00 | 0.00 | 0.60 | 0.26 | 25 | T Cell |
| Hspa14    | 0.38 | 0.00 | 0.00 | 0.35 | 0.10 | 25 | T Cell |
| Ranbp1    | 0.61 | 0.00 | 0.00 | 0.64 | 0.29 | 25 | T Cell |
| Rfc2      | 0.35 | 0.00 | 0.00 | 0.30 | 0.08 | 25 | T Cell |
| Rps3      | 0.44 | 0.00 | 0.00 | 0.99 | 0.83 | 25 | T Cell |
| Cdc42se2  | 0.45 | 0.00 | 0.00 | 0.41 | 0.14 | 25 | T Cell |
| Npm1      | 0.60 | 0.00 | 0.00 | 0.88 | 0.58 | 25 | T Cell |
| Gimap6    | 0.47 | 0.00 | 0.00 | 0.46 | 0.16 | 25 | T Cell |
| Rpl32     | 0.43 | 0.00 | 0.00 | 0.98 | 0.84 | 25 | T Cell |
| Wdr89     | 0.39 | 0.00 | 0.00 | 0.99 | 0.89 | 25 | T Cell |
| Tap2      | 0.35 | 0.00 | 0.00 | 0.27 | 0.07 | 25 | T Cell |
| Stk4      | 0.40 | 0.00 | 0.00 | 0.42 | 0.14 | 25 | T Cell |
| Psme2b    | 0.45 | 0.00 | 0.00 | 0.67 | 0.30 | 25 | T Cell |
| Hist1h2al | 0.44 | 0.00 | 0.00 | 0.33 | 0.10 | 25 | T Cell |
| Stip1     | 0.47 | 0.00 | 0.00 | 0.38 | 0.13 | 25 | T Cell |

|               |      |      |      |      |      |    |        |
|---------------|------|------|------|------|------|----|--------|
| G3bp1         | 0.41 | 0.00 | 0.00 | 0.48 | 0.17 | 25 | T Cell |
| Snrpg         | 0.55 | 0.00 | 0.00 | 0.74 | 0.39 | 25 | T Cell |
| Ncaph2        | 0.41 | 0.00 | 0.00 | 0.30 | 0.09 | 25 | T Cell |
| Rpl13a        | 0.37 | 0.00 | 0.00 | 0.99 | 0.87 | 25 | T Cell |
| Isy1          | 0.35 | 0.00 | 0.00 | 0.28 | 0.08 | 25 | T Cell |
| Srrt          | 0.42 | 0.00 | 0.00 | 0.51 | 0.20 | 25 | T Cell |
| Nhp2          | 0.43 | 0.00 | 0.00 | 0.36 | 0.12 | 25 | T Cell |
| Hars          | 0.32 | 0.00 | 0.00 | 0.32 | 0.10 | 25 | T Cell |
| Exosc3        | 0.35 | 0.00 | 0.00 | 0.26 | 0.07 | 25 | T Cell |
| Nup50         | 0.30 | 0.00 | 0.00 | 0.26 | 0.07 | 25 | T Cell |
| Emg1          | 0.39 | 0.00 | 0.00 | 0.43 | 0.16 | 25 | T Cell |
| Gltp          | 0.36 | 0.00 | 0.00 | 0.33 | 0.10 | 25 | T Cell |
| Dkc1          | 0.35 | 0.00 | 0.00 | 0.36 | 0.12 | 25 | T Cell |
| Cap1          | 0.44 | 0.00 | 0.00 | 0.46 | 0.17 | 25 | T Cell |
| Ezr           | 0.36 | 0.00 | 0.00 | 0.55 | 0.22 | 25 | T Cell |
| Ccm2          | 0.38 | 0.00 | 0.00 | 0.35 | 0.12 | 25 | T Cell |
| Snrpd3        | 0.49 | 0.00 | 0.00 | 0.67 | 0.32 | 25 | T Cell |
| Abrac1        | 0.41 | 0.00 | 0.00 | 0.56 | 0.23 | 25 | T Cell |
| Ncl           | 0.49 | 0.00 | 0.00 | 0.95 | 0.78 | 25 | T Cell |
| Rps3a1        | 0.38 | 0.00 | 0.00 | 0.98 | 0.85 | 25 | T Cell |
| Rpl12         | 0.46 | 0.00 | 0.00 | 0.87 | 0.55 | 25 | T Cell |
| Rbbp8         | 0.37 | 0.00 | 0.00 | 0.29 | 0.09 | 25 | T Cell |
| Vrk1          | 0.38 | 0.00 | 0.00 | 0.27 | 0.08 | 25 | T Cell |
| Ola1          | 0.37 | 0.00 | 0.00 | 0.41 | 0.15 | 25 | T Cell |
| Gtf2f1        | 0.45 | 0.00 | 0.00 | 0.52 | 0.21 | 25 | T Cell |
| Gm10073       | 0.41 | 0.00 | 0.00 | 0.96 | 0.86 | 25 | T Cell |
| Tmsb10        | 0.45 | 0.00 | 0.00 | 0.98 | 0.86 | 25 | T Cell |
| Rps5          | 0.41 | 0.00 | 0.00 | 0.96 | 0.78 | 25 | T Cell |
| Hnrnpa3       | 0.53 | 0.00 | 0.00 | 0.80 | 0.46 | 25 | T Cell |
| Impdh2        | 0.36 | 0.00 | 0.00 | 0.31 | 0.10 | 25 | T Cell |
| Med30         | 0.34 | 0.00 | 0.00 | 0.29 | 0.09 | 25 | T Cell |
| Lsm6          | 0.40 | 0.00 | 0.00 | 0.38 | 0.13 | 25 | T Cell |
| Psm14         | 0.43 | 0.00 | 0.00 | 0.46 | 0.18 | 25 | T Cell |
| Slc25a5       | 0.51 | 0.00 | 0.00 | 0.84 | 0.59 | 25 | T Cell |
| Hnrnpu        | 0.49 | 0.00 | 0.00 | 0.91 | 0.64 | 25 | T Cell |
| Nop56         | 0.48 | 0.00 | 0.00 | 0.49 | 0.20 | 25 | T Cell |
| Sae1          | 0.34 | 0.00 | 0.00 | 0.34 | 0.11 | 25 | T Cell |
| Pole4         | 0.37 | 0.00 | 0.00 | 0.30 | 0.09 | 25 | T Cell |
| 5830418K08Rik | 0.41 | 0.00 | 0.00 | 0.29 | 0.09 | 25 | T Cell |
| Rfc3          | 0.39 | 0.00 | 0.00 | 0.29 | 0.09 | 25 | T Cell |
| Setd8         | 0.32 | 0.00 | 0.00 | 0.35 | 0.12 | 25 | T Cell |
| Tpi1          | 0.43 | 0.00 | 0.00 | 0.40 | 0.15 | 25 | T Cell |
| Atp11b        | 0.38 | 0.00 | 0.00 | 0.26 | 0.07 | 25 | T Cell |

|           |      |      |      |      |      |    |        |
|-----------|------|------|------|------|------|----|--------|
| Nme1      | 0.47 | 0.00 | 0.00 | 0.47 | 0.19 | 25 | T Cell |
| Hint1     | 0.47 | 0.00 | 0.00 | 0.81 | 0.46 | 25 | T Cell |
| Rapgef6   | 0.42 | 0.00 | 0.00 | 0.38 | 0.14 | 25 | T Cell |
| Naa10     | 0.41 | 0.00 | 0.00 | 0.29 | 0.09 | 25 | T Cell |
| Eef1b2    | 0.45 | 0.00 | 0.00 | 0.91 | 0.65 | 25 | T Cell |
| Eif2s1    | 0.39 | 0.00 | 0.00 | 0.37 | 0.13 | 25 | T Cell |
| Rcsd1     | 0.25 | 0.00 | 0.00 | 0.28 | 0.08 | 25 | T Cell |
| Nans      | 0.32 | 0.00 | 0.00 | 0.29 | 0.09 | 25 | T Cell |
| Rgs10     | 0.33 | 0.00 | 0.00 | 0.31 | 0.10 | 25 | T Cell |
| Rps20     | 0.42 | 0.00 | 0.00 | 0.95 | 0.79 | 25 | T Cell |
| Cdc42se1  | 0.42 | 0.00 | 0.00 | 0.48 | 0.19 | 25 | T Cell |
| H2-T22    | 0.34 | 0.00 | 0.00 | 0.28 | 0.08 | 25 | T Cell |
| Smc6      | 0.42 | 0.00 | 0.00 | 0.67 | 0.33 | 25 | T Cell |
| Psme2     | 0.36 | 0.00 | 0.00 | 0.55 | 0.24 | 25 | T Cell |
| Nmi       | 0.28 | 0.00 | 0.00 | 0.34 | 0.11 | 25 | T Cell |
| Nudc      | 0.39 | 0.00 | 0.00 | 0.50 | 0.21 | 25 | T Cell |
| Kars      | 0.32 | 0.00 | 0.00 | 0.26 | 0.07 | 25 | T Cell |
| Tfam      | 0.28 | 0.00 | 0.00 | 0.27 | 0.08 | 25 | T Cell |
| Gclm      | 0.51 | 0.00 | 0.00 | 0.74 | 0.42 | 25 | T Cell |
| Syncrip   | 0.44 | 0.00 | 0.00 | 0.55 | 0.25 | 25 | T Cell |
| Ppp1ca    | 0.48 | 0.00 | 0.00 | 0.66 | 0.33 | 25 | T Cell |
| Arhgef1   | 0.34 | 0.00 | 0.00 | 0.34 | 0.12 | 25 | T Cell |
| Naa38     | 0.35 | 0.00 | 0.00 | 0.40 | 0.15 | 25 | T Cell |
| Gm5160    | 0.43 | 0.00 | 0.00 | 0.50 | 0.22 | 25 | T Cell |
| Gnb2l1    | 0.43 | 0.00 | 0.00 | 0.92 | 0.65 | 25 | T Cell |
| Tnfaip8   | 0.39 | 0.00 | 0.00 | 0.32 | 0.11 | 25 | T Cell |
| Gm4204    | 0.40 | 0.00 | 0.00 | 0.83 | 0.50 | 25 | T Cell |
| Gm9396    | 0.43 | 0.00 | 0.00 | 0.85 | 0.54 | 25 | T Cell |
| Kpnb1     | 0.40 | 0.00 | 0.00 | 0.46 | 0.19 | 25 | T Cell |
| Prelid1   | 0.45 | 0.00 | 0.00 | 0.60 | 0.29 | 25 | T Cell |
| Arpc2     | 0.41 | 0.00 | 0.00 | 0.92 | 0.61 | 25 | T Cell |
| Snrpa1    | 0.29 | 0.00 | 0.00 | 0.38 | 0.14 | 25 | T Cell |
| Sf3b5     | 0.40 | 0.00 | 0.00 | 0.51 | 0.22 | 25 | T Cell |
| Sf3a3     | 0.33 | 0.00 | 0.00 | 0.34 | 0.12 | 25 | T Cell |
| Hmga1-rs1 | 0.28 | 0.00 | 0.00 | 0.25 | 0.08 | 25 | T Cell |
| Larp7     | 0.33 | 0.00 | 0.00 | 0.43 | 0.17 | 25 | T Cell |
| Rps15a    | 0.34 | 0.00 | 0.00 | 0.96 | 0.81 | 25 | T Cell |
| Hnrnpd    | 0.43 | 0.00 | 0.00 | 0.60 | 0.28 | 25 | T Cell |
| Rps16     | 0.34 | 0.00 | 0.00 | 0.97 | 0.84 | 25 | T Cell |
| Gm4070    | 0.37 | 0.00 | 0.00 | 0.34 | 0.12 | 25 | T Cell |
| Cfl1      | 0.48 | 0.00 | 0.00 | 0.86 | 0.58 | 25 | T Cell |
| Lrrfip1   | 0.38 | 0.00 | 0.00 | 0.56 | 0.25 | 25 | T Cell |
| Bzw1      | 0.44 | 0.00 | 0.00 | 0.65 | 0.32 | 25 | T Cell |

|            |      |      |      |      |      |    |        |
|------------|------|------|------|------|------|----|--------|
| Hnrnpc     | 0.44 | 0.00 | 0.00 | 0.78 | 0.44 | 25 | T Cell |
| Mrpl40     | 0.29 | 0.00 | 0.00 | 0.32 | 0.11 | 25 | T Cell |
| Tubb4b-ps1 | 0.29 | 0.00 | 0.00 | 0.27 | 0.09 | 25 | T Cell |
| Odf2       | 0.34 | 0.00 | 0.00 | 0.27 | 0.09 | 25 | T Cell |
| Eif4a3     | 0.40 | 0.00 | 0.00 | 0.45 | 0.19 | 25 | T Cell |
| Tcof1      | 0.31 | 0.00 | 0.00 | 0.32 | 0.11 | 25 | T Cell |
| Ywhah      | 0.47 | 0.00 | 0.00 | 0.55 | 0.26 | 25 | T Cell |
| Tsc22d4    | 0.37 | 0.00 | 0.00 | 0.59 | 0.28 | 25 | T Cell |
| Slmo2      | 0.32 | 0.00 | 0.00 | 0.28 | 0.09 | 25 | T Cell |
| Nt5c       | 0.27 | 0.00 | 0.00 | 0.41 | 0.16 | 25 | T Cell |
| Hsp90aa1   | 0.41 | 0.00 | 0.00 | 0.79 | 0.47 | 25 | T Cell |
| Gvin1      | 0.38 | 0.00 | 0.00 | 0.33 | 0.12 | 25 | T Cell |
| Mettl23    | 0.28 | 0.00 | 0.00 | 0.32 | 0.11 | 25 | T Cell |
| Rps6       | 0.34 | 0.00 | 0.00 | 0.98 | 0.82 | 25 | T Cell |
| Nap1l1     | 0.33 | 0.00 | 0.00 | 0.80 | 0.47 | 25 | T Cell |
| Snrnp40    | 0.30 | 0.00 | 0.00 | 0.26 | 0.08 | 25 | T Cell |
| Hnrnpab    | 0.52 | 0.00 | 0.00 | 0.63 | 0.33 | 25 | T Cell |
| Gm10093    | 0.39 | 0.00 | 0.00 | 0.46 | 0.19 | 25 | T Cell |
| Stat1      | 0.39 | 0.00 | 0.00 | 0.30 | 0.10 | 25 | T Cell |
| Ide        | 0.33 | 0.00 | 0.00 | 0.27 | 0.09 | 25 | T Cell |
| Cox20      | 0.27 | 0.00 | 0.00 | 0.45 | 0.18 | 25 | T Cell |
| Celf2      | 0.32 | 0.00 | 0.00 | 0.60 | 0.28 | 25 | T Cell |
| Set        | 0.48 | 0.00 | 0.00 | 0.65 | 0.34 | 25 | T Cell |
| Casp3      | 0.38 | 0.00 | 0.00 | 0.25 | 0.08 | 25 | T Cell |
| Ppp2r5c    | 0.37 | 0.00 | 0.00 | 0.48 | 0.21 | 25 | T Cell |
| Cox5a      | 0.37 | 0.00 | 0.00 | 0.63 | 0.31 | 25 | T Cell |
| Stra13     | 0.30 | 0.00 | 0.00 | 0.26 | 0.08 | 25 | T Cell |
| Ptbp3      | 0.34 | 0.00 | 0.00 | 0.72 | 0.36 | 25 | T Cell |
| Tmed5      | 0.33 | 0.00 | 0.00 | 0.42 | 0.17 | 25 | T Cell |
| Sptssa     | 0.32 | 0.00 | 0.00 | 0.47 | 0.20 | 25 | T Cell |
| Parp2      | 0.33 | 0.00 | 0.00 | 0.30 | 0.10 | 25 | T Cell |
| Rps3a2     | 0.34 | 0.00 | 0.00 | 0.95 | 0.82 | 25 | T Cell |
| Tcp1       | 0.32 | 0.00 | 0.00 | 0.53 | 0.24 | 25 | T Cell |
| Rplp2      | 0.33 | 0.00 | 0.00 | 0.97 | 0.81 | 25 | T Cell |
| Smarca5    | 0.38 | 0.00 | 0.00 | 0.62 | 0.30 | 25 | T Cell |
| Rnaseh2c   | 0.32 | 0.00 | 0.00 | 0.30 | 0.11 | 25 | T Cell |
| Psmb2      | 0.30 | 0.00 | 0.00 | 0.56 | 0.25 | 25 | T Cell |
| Ing1       | 0.32 | 0.00 | 0.00 | 0.39 | 0.15 | 25 | T Cell |
| Rps2       | 0.44 | 0.00 | 0.00 | 0.88 | 0.67 | 25 | T Cell |
| Mrpl42     | 0.38 | 0.00 | 0.00 | 0.35 | 0.13 | 25 | T Cell |
| Ak2        | 0.30 | 0.00 | 0.00 | 0.39 | 0.15 | 25 | T Cell |
| Arpc5l     | 0.32 | 0.00 | 0.00 | 0.41 | 0.17 | 25 | T Cell |
| Dhx9       | 0.37 | 0.00 | 0.00 | 0.44 | 0.19 | 25 | T Cell |

|            |      |      |      |      |      |    |        |
|------------|------|------|------|------|------|----|--------|
| Ahsa1      | 0.28 | 0.00 | 0.00 | 0.34 | 0.13 | 25 | T Cell |
| Naa50      | 0.37 | 0.00 | 0.00 | 0.34 | 0.13 | 25 | T Cell |
| Cd47       | 0.37 | 0.00 | 0.00 | 0.77 | 0.43 | 25 | T Cell |
| Npm3       | 0.26 | 0.00 | 0.00 | 0.28 | 0.10 | 25 | T Cell |
| Eef1d      | 0.33 | 0.00 | 0.00 | 0.54 | 0.26 | 25 | T Cell |
| Nsmce2     | 0.30 | 0.00 | 0.00 | 0.33 | 0.12 | 25 | T Cell |
| Xrn2       | 0.39 | 0.00 | 0.00 | 0.60 | 0.30 | 25 | T Cell |
| Arl4c      | 0.38 | 0.00 | 0.00 | 0.29 | 0.10 | 25 | T Cell |
| Smarcc1    | 0.30 | 0.00 | 0.00 | 0.40 | 0.17 | 25 | T Cell |
| Eif5a      | 0.41 | 0.00 | 0.00 | 0.64 | 0.34 | 25 | T Cell |
| Rpl5       | 0.34 | 0.00 | 0.00 | 0.94 | 0.74 | 25 | T Cell |
| Pdcd4      | 0.40 | 0.00 | 0.00 | 0.49 | 0.23 | 25 | T Cell |
| Aebp2      | 0.29 | 0.00 | 0.00 | 0.30 | 0.11 | 25 | T Cell |
| Hdac1      | 0.36 | 0.00 | 0.00 | 0.44 | 0.19 | 25 | T Cell |
| Wdr1       | 0.31 | 0.00 | 0.00 | 0.40 | 0.17 | 25 | T Cell |
| Thrap3     | 0.37 | 0.00 | 0.00 | 0.69 | 0.37 | 25 | T Cell |
| Tma7       | 0.35 | 0.00 | 0.00 | 0.62 | 0.32 | 25 | T Cell |
| Rpl3       | 0.37 | 0.00 | 0.00 | 0.86 | 0.63 | 25 | T Cell |
| Cdc5l      | 0.32 | 0.00 | 0.00 | 0.49 | 0.22 | 25 | T Cell |
| Actr2      | 0.33 | 0.00 | 0.00 | 0.57 | 0.27 | 25 | T Cell |
| Erh        | 0.33 | 0.00 | 0.00 | 0.58 | 0.28 | 25 | T Cell |
| Utp3       | 0.39 | 0.00 | 0.00 | 0.48 | 0.22 | 25 | T Cell |
| Hspa8      | 0.42 | 0.00 | 0.00 | 0.89 | 0.67 | 25 | T Cell |
| Nap1l4     | 0.33 | 0.00 | 0.00 | 0.55 | 0.26 | 25 | T Cell |
| Bola2      | 0.31 | 0.00 | 0.00 | 0.39 | 0.16 | 25 | T Cell |
| Sf3b2      | 0.36 | 0.00 | 0.00 | 0.72 | 0.39 | 25 | T Cell |
| Smc3       | 0.35 | 0.00 | 0.00 | 0.68 | 0.38 | 25 | T Cell |
| AC121131.2 | 0.36 | 0.00 | 0.00 | 0.72 | 0.40 | 25 | T Cell |
| Gspt1      | 0.31 | 0.00 | 0.00 | 0.37 | 0.15 | 25 | T Cell |
| Cnot6l     | 0.27 | 0.00 | 0.00 | 0.34 | 0.13 | 25 | T Cell |
| Uba2       | 0.27 | 0.00 | 0.00 | 0.30 | 0.11 | 25 | T Cell |
| Ppm1g      | 0.34 | 0.00 | 0.00 | 0.34 | 0.13 | 25 | T Cell |
| Rab8a      | 0.36 | 0.00 | 0.00 | 0.34 | 0.14 | 25 | T Cell |
| Gm6104     | 0.28 | 0.00 | 0.00 | 0.32 | 0.13 | 25 | T Cell |
| Orc6       | 0.33 | 0.00 | 0.00 | 0.28 | 0.10 | 25 | T Cell |
| Khdrbs1    | 0.31 | 0.00 | 0.00 | 0.62 | 0.31 | 25 | T Cell |
| Nsmce1     | 0.37 | 0.00 | 0.00 | 0.34 | 0.14 | 25 | T Cell |
| Rnps1      | 0.27 | 0.00 | 0.00 | 0.37 | 0.15 | 25 | T Cell |
| Ptpn2      | 0.28 | 0.00 | 0.00 | 0.33 | 0.13 | 25 | T Cell |
| AC167036.1 | 0.30 | 0.00 | 0.00 | 0.61 | 0.30 | 25 | T Cell |
| Agpat5     | 0.27 | 0.00 | 0.00 | 0.27 | 0.10 | 25 | T Cell |
| Arpc1b     | 0.31 | 0.00 | 0.00 | 0.68 | 0.37 | 25 | T Cell |
| Mdh2       | 0.30 | 0.00 | 0.00 | 0.48 | 0.22 | 25 | T Cell |

|            |      |      |      |      |      |    |        |
|------------|------|------|------|------|------|----|--------|
| Mtf2       | 0.33 | 0.00 | 0.00 | 0.40 | 0.18 | 25 | T Cell |
| Rps18      | 0.34 | 0.00 | 0.00 | 0.89 | 0.65 | 25 | T Cell |
| Rps10-ps1  | 0.31 | 0.00 | 0.00 | 0.94 | 0.77 | 25 | T Cell |
| Nop10      | 0.31 | 0.00 | 0.00 | 0.56 | 0.28 | 25 | T Cell |
| AC123611.1 | 0.34 | 0.00 | 0.00 | 0.70 | 0.39 | 25 | T Cell |
| Pak2       | 0.31 | 0.00 | 0.00 | 0.58 | 0.29 | 25 | T Cell |
| Actg1      | 0.37 | 0.00 | 0.00 | 0.92 | 0.76 | 25 | T Cell |
| G3bp2      | 0.35 | 0.00 | 0.00 | 0.60 | 0.31 | 25 | T Cell |
| Fip1l1     | 0.27 | 0.00 | 0.00 | 0.41 | 0.18 | 25 | T Cell |
| Taf15      | 0.30 | 0.00 | 0.00 | 0.27 | 0.10 | 25 | T Cell |
| Trmt112    | 0.27 | 0.00 | 0.00 | 0.35 | 0.14 | 25 | T Cell |
| Cct2       | 0.30 | 0.00 | 0.00 | 0.54 | 0.27 | 25 | T Cell |
| Psma2      | 0.38 | 0.00 | 0.00 | 0.72 | 0.44 | 25 | T Cell |
| Gm5611     | 0.43 | 0.00 | 0.00 | 0.62 | 0.36 | 25 | T Cell |
| Vps28      | 0.27 | 0.00 | 0.00 | 0.41 | 0.18 | 25 | T Cell |
| Srsf2      | 0.38 | 0.00 | 0.00 | 0.67 | 0.38 | 25 | T Cell |
| Baz1b      | 0.27 | 0.00 | 0.00 | 0.54 | 0.27 | 25 | T Cell |
| Hnrnpm     | 0.30 | 0.00 | 0.00 | 0.82 | 0.49 | 25 | T Cell |
| Srp9       | 0.29 | 0.00 | 0.00 | 0.56 | 0.28 | 25 | T Cell |
| Hnrnpul1   | 0.28 | 0.00 | 0.00 | 0.30 | 0.12 | 25 | T Cell |
| Rpl8       | 0.31 | 0.00 | 0.00 | 0.95 | 0.79 | 25 | T Cell |
| Ifngr1     | 0.35 | 0.00 | 0.00 | 0.49 | 0.24 | 25 | T Cell |
| Lyar       | 0.35 | 0.00 | 0.00 | 0.36 | 0.16 | 25 | T Cell |
| Twistnb    | 0.26 | 0.00 | 0.00 | 0.33 | 0.13 | 25 | T Cell |
| Rfc1       | 0.33 | 0.00 | 0.00 | 0.43 | 0.21 | 25 | T Cell |
| Eef1a1     | 0.27 | 0.00 | 0.00 | 0.97 | 0.87 | 25 | T Cell |
| Gm9825     | 0.26 | 0.00 | 0.00 | 0.32 | 0.13 | 25 | T Cell |
| Rps13      | 0.34 | 0.00 | 0.00 | 0.88 | 0.64 | 25 | T Cell |
| Rpl19      | 0.28 | 0.00 | 0.00 | 0.95 | 0.75 | 25 | T Cell |
| Rps3a3     | 0.31 | 0.00 | 0.00 | 0.95 | 0.78 | 25 | T Cell |
| Sumo2      | 0.33 | 0.00 | 0.00 | 0.58 | 0.30 | 25 | T Cell |
| Ddx21      | 0.38 | 0.00 | 0.00 | 0.51 | 0.26 | 25 | T Cell |
| Nolc1      | 0.34 | 0.00 | 0.00 | 0.39 | 0.18 | 25 | T Cell |
| Atp5a1     | 0.34 | 0.00 | 0.00 | 0.70 | 0.41 | 25 | T Cell |
| Calm2      | 0.35 | 0.00 | 0.00 | 0.90 | 0.64 | 25 | T Cell |
| Rpl6       | 0.27 | 0.00 | 0.00 | 0.99 | 0.87 | 25 | T Cell |
| Oaz1       | 0.37 | 0.00 | 0.00 | 0.86 | 0.62 | 25 | T Cell |
| Cdc123     | 0.28 | 0.00 | 0.00 | 0.31 | 0.13 | 25 | T Cell |
| Gm10269    | 0.30 | 0.00 | 0.00 | 0.95 | 0.79 | 25 | T Cell |
| Cct7       | 0.28 | 0.00 | 0.00 | 0.45 | 0.21 | 25 | T Cell |
| Gm2000     | 0.28 | 0.00 | 0.00 | 0.97 | 0.84 | 25 | T Cell |
| Hspa4      | 0.29 | 0.00 | 0.00 | 0.48 | 0.23 | 25 | T Cell |
| Eml4       | 0.35 | 0.00 | 0.00 | 0.38 | 0.18 | 25 | T Cell |

|               |      |      |      |      |      |    |        |
|---------------|------|------|------|------|------|----|--------|
| Spcs2         | 0.31 | 0.00 | 0.00 | 0.58 | 0.31 | 25 | T Cell |
| Cdc42         | 0.35 | 0.00 | 0.00 | 0.82 | 0.54 | 25 | T Cell |
| Rpl22         | 0.32 | 0.00 | 0.00 | 0.94 | 0.79 | 25 | T Cell |
| Rexo2         | 0.28 | 0.00 | 0.00 | 0.34 | 0.15 | 25 | T Cell |
| Rpl18a        | 0.26 | 0.00 | 0.00 | 0.99 | 0.82 | 25 | T Cell |
| Rpl39         | 0.27 | 0.00 | 0.00 | 0.95 | 0.80 | 25 | T Cell |
| 0610009D07Rik | 0.25 | 0.00 | 0.00 | 0.45 | 0.22 | 25 | T Cell |
| Hspd1         | 0.33 | 0.00 | 0.00 | 0.50 | 0.25 | 25 | T Cell |
| Ube2i         | 0.27 | 0.00 | 0.00 | 0.55 | 0.29 | 25 | T Cell |
| Orc5          | 0.37 | 0.00 | 0.00 | 0.80 | 0.56 | 25 | T Cell |
| Capzb         | 0.30 | 0.00 | 0.00 | 0.71 | 0.42 | 25 | T Cell |
| Fgfr1op2      | 0.32 | 0.00 | 0.00 | 0.53 | 0.28 | 25 | T Cell |
| Gm6472        | 0.29 | 0.00 | 0.00 | 0.95 | 0.80 | 25 | T Cell |
| Efr3a         | 0.27 | 0.00 | 0.00 | 0.30 | 0.13 | 25 | T Cell |
| Capg          | 0.27 | 0.00 | 0.00 | 0.27 | 0.11 | 25 | T Cell |
| Ngdn          | 0.31 | 0.00 | 0.00 | 0.27 | 0.11 | 25 | T Cell |
| Dnaja2        | 0.29 | 0.00 | 0.00 | 0.50 | 0.25 | 25 | T Cell |
| Gm10260       | 0.33 | 0.00 | 0.00 | 0.75 | 0.49 | 25 | T Cell |
| Rpl10a        | 0.29 | 0.00 | 0.00 | 0.93 | 0.74 | 25 | T Cell |
| Cct5          | 0.26 | 0.00 | 0.00 | 0.47 | 0.23 | 25 | T Cell |
| Gm11273       | 0.30 | 0.00 | 0.00 | 0.65 | 0.38 | 25 | T Cell |
| Psmal         | 0.27 | 0.00 | 0.00 | 0.50 | 0.26 | 25 | T Cell |
| Usp3          | 0.27 | 0.00 | 0.00 | 0.26 | 0.11 | 25 | T Cell |
| Gm8225        | 0.27 | 0.00 | 0.00 | 0.34 | 0.15 | 25 | T Cell |
| Gm4968        | 0.28 | 0.00 | 0.00 | 0.35 | 0.16 | 25 | T Cell |
| Mapre1        | 0.26 | 0.00 | 0.00 | 0.56 | 0.29 | 25 | T Cell |
| Rif1          | 0.27 | 0.00 | 0.00 | 0.36 | 0.17 | 25 | T Cell |
| Stk38         | 0.30 | 0.00 | 0.00 | 0.41 | 0.20 | 25 | T Cell |
| Bcas2         | 0.27 | 0.00 | 0.00 | 0.43 | 0.21 | 25 | T Cell |
| Tra2b         | 0.29 | 0.00 | 0.00 | 0.55 | 0.29 | 25 | T Cell |
| Ube2l3        | 0.27 | 0.00 | 0.00 | 0.50 | 0.26 | 25 | T Cell |
| Trp53         | 0.26 | 0.00 | 0.00 | 0.35 | 0.16 | 25 | T Cell |
| Gm17511       | 0.31 | 0.00 | 0.00 | 0.87 | 0.61 | 25 | T Cell |
| Sf3b1         | 0.28 | 0.00 | 0.00 | 0.75 | 0.46 | 25 | T Cell |
| Yeats4        | 0.28 | 0.00 | 0.00 | 0.39 | 0.19 | 25 | T Cell |
| Tpr           | 0.28 | 0.00 | 0.00 | 0.78 | 0.50 | 25 | T Cell |
| Cox8a         | 0.30 | 0.00 | 0.00 | 0.83 | 0.56 | 25 | T Cell |
| Rpl22l1       | 0.33 | 0.00 | 0.00 | 0.79 | 0.56 | 25 | T Cell |
| Rpl23a        | 0.26 | 0.00 | 0.00 | 0.90 | 0.66 | 25 | T Cell |
| Rps7          | 0.28 | 0.00 | 0.00 | 0.92 | 0.74 | 25 | T Cell |
| Cox5b         | 0.26 | 0.00 | 0.00 | 0.67 | 0.39 | 25 | T Cell |
| Rps17         | 0.26 | 0.00 | 0.00 | 0.92 | 0.77 | 25 | T Cell |
| Ctdspl2       | 0.34 | 0.00 | 0.00 | 0.27 | 0.11 | 25 | T Cell |

|               |      |      |      |      |      |    |            |
|---------------|------|------|------|------|------|----|------------|
| Rps18-ps3     | 0.33 | 0.00 | 0.00 | 0.80 | 0.56 | 25 | T Cell     |
| Gm11808       | 0.26 | 0.00 | 0.00 | 0.94 | 0.77 | 25 | T Cell     |
| Cast          | 0.29 | 0.00 | 0.00 | 0.40 | 0.20 | 25 | T Cell     |
| Rsl1d1        | 0.29 | 0.00 | 0.00 | 0.51 | 0.27 | 25 | T Cell     |
| Rpl13a-ps1    | 0.28 | 0.00 | 0.00 | 0.81 | 0.55 | 25 | T Cell     |
| Rps10         | 0.28 | 0.00 | 0.00 | 0.88 | 0.70 | 25 | T Cell     |
| Cdkn1b        | 0.28 | 0.00 | 0.00 | 0.42 | 0.21 | 25 | T Cell     |
| Gm6139        | 0.28 | 0.00 | 0.00 | 0.70 | 0.42 | 25 | T Cell     |
| Arpc5         | 0.29 | 0.00 | 0.00 | 0.82 | 0.56 | 25 | T Cell     |
| Ilf2          | 0.25 | 0.00 | 0.00 | 0.39 | 0.19 | 25 | T Cell     |
| Rps2-ps6      | 0.31 | 0.00 | 0.00 | 0.65 | 0.41 | 25 | T Cell     |
| Atp5o         | 0.28 | 0.00 | 0.00 | 0.61 | 0.35 | 25 | T Cell     |
| Tagln2        | 0.33 | 0.00 | 0.00 | 0.69 | 0.45 | 25 | T Cell     |
| Rpl18         | 0.28 | 0.00 | 0.00 | 0.85 | 0.64 | 25 | T Cell     |
| Atp5j         | 0.26 | 0.00 | 0.00 | 0.73 | 0.46 | 25 | T Cell     |
| Id2           | 0.73 | 0.00 | 0.00 | 0.49 | 0.33 | 25 | T Cell     |
| Rpl36a1       | 0.26 | 0.00 | 0.00 | 0.79 | 0.52 | 25 | T Cell     |
| Atp5b         | 0.28 | 0.00 | 0.00 | 0.69 | 0.44 | 25 | T Cell     |
| Ndufa1        | 0.25 | 0.00 | 0.00 | 0.55 | 0.31 | 25 | T Cell     |
| Rps12-ps3     | 0.26 | 0.00 | 0.00 | 0.93 | 0.79 | 25 | T Cell     |
| Rpl23a-ps1    | 0.25 | 0.00 | 0.00 | 0.33 | 0.16 | 25 | T Cell     |
| Eef1g         | 0.27 | 0.00 | 0.00 | 0.73 | 0.49 | 25 | T Cell     |
| Rpl17         | 0.28 | 0.00 | 0.00 | 0.78 | 0.54 | 25 | T Cell     |
| Gm6576        | 0.28 | 0.00 | 0.00 | 0.52 | 0.31 | 25 | T Cell     |
| Atp5f1        | 0.26 | 0.00 | 0.00 | 0.74 | 0.47 | 25 | T Cell     |
| Rps2-ps10     | 0.27 | 0.00 | 0.00 | 0.65 | 0.43 | 25 | T Cell     |
| Paics         | 0.26 | 0.00 | 0.00 | 0.40 | 0.23 | 25 | T Cell     |
| Igkc          | 2.44 | 0.00 | 0.00 | 0.88 | 0.05 | 26 | Fibroblast |
| Hist1h2ag     | 2.43 | 0.00 | 0.00 | 0.89 | 0.11 | 26 | Fibroblast |
| Ighm          | 2.40 | 0.00 | 0.00 | 0.94 | 0.07 | 26 | Fibroblast |
| Hist1h2ac     | 2.32 | 0.00 | 0.00 | 0.87 | 0.10 | 26 | Fibroblast |
| Hist1h2ad     | 2.29 | 0.00 | 0.00 | 0.85 | 0.10 | 26 | Fibroblast |
| Hist1h2ah     | 2.25 | 0.00 | 0.00 | 0.87 | 0.09 | 26 | Fibroblast |
| Hist1h2an     | 2.18 | 0.00 | 0.00 | 0.85 | 0.09 | 26 | Fibroblast |
| Ms4a1         | 2.17 | 0.00 | 0.00 | 0.91 | 0.05 | 26 | Fibroblast |
| Hist1h2ai     | 2.17 | 0.00 | 0.00 | 0.84 | 0.10 | 26 | Fibroblast |
| Hist1h2af     | 2.17 | 0.00 | 0.00 | 0.84 | 0.09 | 26 | Fibroblast |
| Top2a         | 2.05 | 0.00 | 0.00 | 0.94 | 0.11 | 26 | Fibroblast |
| Hist1h2ae     | 2.03 | 0.00 | 0.00 | 0.80 | 0.09 | 26 | Fibroblast |
| Ly6d          | 2.02 | 0.00 | 0.00 | 0.82 | 0.04 | 26 | Fibroblast |
| Hist1h2ak     | 2.01 | 0.00 | 0.00 | 0.79 | 0.07 | 26 | Fibroblast |
| Mki67         | 2.00 | 0.00 | 0.00 | 0.92 | 0.12 | 26 | Fibroblast |
| 2810417H13Rik | 1.99 | 0.00 | 0.00 | 0.78 | 0.08 | 26 | Fibroblast |

|               |      |      |      |      |      |    |            |
|---------------|------|------|------|------|------|----|------------|
| Hist1h2ab     | 1.95 | 0.00 | 0.00 | 0.77 | 0.09 | 26 | Fibroblast |
| Iglc2         | 1.91 | 0.00 | 0.00 | 0.64 | 0.03 | 26 | Fibroblast |
| Cd79a         | 1.77 | 0.00 | 0.00 | 0.81 | 0.04 | 26 | Fibroblast |
| Nusap1        | 1.69 | 0.00 | 0.00 | 0.70 | 0.06 | 26 | Fibroblast |
| Cd79b         | 1.69 | 0.00 | 0.00 | 0.81 | 0.05 | 26 | Fibroblast |
| Mzb1          | 1.29 | 0.00 | 0.00 | 0.52 | 0.02 | 26 | Fibroblast |
| Siglecg       | 1.26 | 0.00 | 0.00 | 0.50 | 0.02 | 26 | Fibroblast |
| Bank1         | 1.24 | 0.00 | 0.00 | 0.46 | 0.03 | 26 | Fibroblast |
| Fcrla         | 1.18 | 0.00 | 0.00 | 0.45 | 0.02 | 26 | Fibroblast |
| Fam129c       | 1.10 | 0.00 | 0.00 | 0.43 | 0.02 | 26 | Fibroblast |
| Cd19          | 1.09 | 0.00 | 0.00 | 0.44 | 0.02 | 26 | Fibroblast |
| Pax5          | 1.09 | 0.00 | 0.00 | 0.44 | 0.02 | 26 | Fibroblast |
| Tnfrsf13c     | 1.07 | 0.00 | 0.00 | 0.40 | 0.02 | 26 | Fibroblast |
| Gm19980       | 0.95 | 0.00 | 0.00 | 0.34 | 0.01 | 26 | Fibroblast |
| Spib          | 0.85 | 0.00 | 0.00 | 0.33 | 0.01 | 26 | Fibroblast |
| Pou2af1       | 0.82 | 0.00 | 0.00 | 0.31 | 0.01 | 26 | Fibroblast |
| Hist1h2ap     | 2.58 | 0.00 | 0.00 | 0.94 | 0.15 | 26 | Fibroblast |
| Cd37          | 1.50 | 0.00 | 0.00 | 0.71 | 0.07 | 26 | Fibroblast |
| Hist1h2ao     | 2.56 | 0.00 | 0.00 | 0.91 | 0.15 | 26 | Fibroblast |
| Blnk          | 0.78 | 0.00 | 0.00 | 0.31 | 0.01 | 26 | Fibroblast |
| Ncapg         | 1.22 | 0.00 | 0.00 | 0.51 | 0.04 | 26 | Fibroblast |
| Ptprcap       | 1.21 | 0.00 | 0.00 | 0.66 | 0.07 | 26 | Fibroblast |
| H2afx         | 1.64 | 0.00 | 0.00 | 0.72 | 0.09 | 26 | Fibroblast |
| Faim3         | 0.87 | 0.00 | 0.00 | 0.26 | 0.01 | 26 | Fibroblast |
| Prc1          | 1.27 | 0.00 | 0.00 | 0.61 | 0.07 | 26 | Fibroblast |
| Incenp        | 1.41 | 0.00 | 0.00 | 0.66 | 0.08 | 26 | Fibroblast |
| Birc5         | 1.21 | 0.00 | 0.00 | 0.59 | 0.06 | 26 | Fibroblast |
| Phgdh         | 0.86 | 0.00 | 0.00 | 0.35 | 0.02 | 26 | Fibroblast |
| Esco2         | 1.20 | 0.00 | 0.00 | 0.41 | 0.03 | 26 | Fibroblast |
| Ly86          | 1.11 | 0.00 | 0.00 | 0.59 | 0.07 | 26 | Fibroblast |
| Hist1h1b      | 1.40 | 0.00 | 0.00 | 0.43 | 0.04 | 26 | Fibroblast |
| Cdca3         | 0.98 | 0.00 | 0.00 | 0.42 | 0.04 | 26 | Fibroblast |
| Cdca8         | 1.13 | 0.00 | 0.00 | 0.49 | 0.05 | 26 | Fibroblast |
| Sgol1         | 0.99 | 0.00 | 0.00 | 0.37 | 0.03 | 26 | Fibroblast |
| Hmmr          | 1.22 | 0.00 | 0.00 | 0.46 | 0.04 | 26 | Fibroblast |
| Ube2c         | 1.46 | 0.00 | 0.00 | 0.49 | 0.05 | 26 | Fibroblast |
| C130026I21Rik | 0.94 | 0.00 | 0.00 | 0.37 | 0.03 | 26 | Fibroblast |
| Cd74          | 1.32 | 0.00 | 0.00 | 0.75 | 0.12 | 26 | Fibroblast |
| Ncapd2        | 1.04 | 0.00 | 0.00 | 0.44 | 0.04 | 26 | Fibroblast |
| Aurkb         | 0.88 | 0.00 | 0.00 | 0.34 | 0.03 | 26 | Fibroblast |
| Cd2           | 1.10 | 0.00 | 0.00 | 0.44 | 0.04 | 26 | Fibroblast |
| Kif11         | 1.02 | 0.00 | 0.00 | 0.41 | 0.04 | 26 | Fibroblast |
| Cenpe         | 1.37 | 0.00 | 0.00 | 0.58 | 0.08 | 26 | Fibroblast |

|               |      |      |      |      |      |    |            |
|---------------|------|------|------|------|------|----|------------|
| Bcl11a        | 0.96 | 0.00 | 0.00 | 0.36 | 0.03 | 26 | Fibroblast |
| Cdca2         | 0.80 | 0.00 | 0.00 | 0.29 | 0.02 | 26 | Fibroblast |
| Aspm          | 1.04 | 0.00 | 0.00 | 0.36 | 0.03 | 26 | Fibroblast |
| Smc2          | 1.30 | 0.00 | 0.00 | 0.75 | 0.13 | 26 | Fibroblast |
| Rac2          | 1.17 | 0.00 | 0.00 | 0.69 | 0.11 | 26 | Fibroblast |
| H2-Ab1        | 1.31 | 0.00 | 0.00 | 0.61 | 0.09 | 26 | Fibroblast |
| Sp140         | 1.15 | 0.00 | 0.00 | 0.54 | 0.07 | 26 | Fibroblast |
| Gm15987       | 0.70 | 0.00 | 0.00 | 0.25 | 0.02 | 26 | Fibroblast |
| Kif15         | 0.99 | 0.00 | 0.00 | 0.42 | 0.04 | 26 | Fibroblast |
| Clspn         | 1.09 | 0.00 | 0.00 | 0.41 | 0.04 | 26 | Fibroblast |
| Cenpa         | 1.19 | 0.00 | 0.00 | 0.51 | 0.06 | 26 | Fibroblast |
| Plac8         | 1.14 | 0.00 | 0.00 | 0.83 | 0.17 | 26 | Fibroblast |
| Ccna2         | 0.93 | 0.00 | 0.00 | 0.38 | 0.04 | 26 | Fibroblast |
| Cenpf         | 1.36 | 0.00 | 0.00 | 0.55 | 0.08 | 26 | Fibroblast |
| Cks2          | 1.10 | 0.00 | 0.00 | 0.56 | 0.08 | 26 | Fibroblast |
| Hmgb2         | 1.85 | 0.00 | 0.00 | 1.00 | 0.42 | 26 | Fibroblast |
| Prkcb         | 0.75 | 0.00 | 0.00 | 0.30 | 0.02 | 26 | Fibroblast |
| Cd52          | 1.30 | 0.00 | 0.00 | 0.90 | 0.20 | 26 | Fibroblast |
| H2-Aa         | 1.22 | 0.00 | 0.00 | 0.55 | 0.08 | 26 | Fibroblast |
| Kif20b        | 1.08 | 0.00 | 0.00 | 0.49 | 0.07 | 26 | Fibroblast |
| Tacc3         | 1.01 | 0.00 | 0.00 | 0.44 | 0.06 | 26 | Fibroblast |
| Tnfrsf13b     | 0.88 | 0.00 | 0.00 | 0.40 | 0.04 | 26 | Fibroblast |
| Kif23         | 1.05 | 0.00 | 0.00 | 0.44 | 0.06 | 26 | Fibroblast |
| RP23-45G16.5  | 1.08 | 0.00 | 0.00 | 0.41 | 0.05 | 26 | Fibroblast |
| Rad51         | 0.81 | 0.00 | 0.00 | 0.29 | 0.03 | 26 | Fibroblast |
| Vars          | 0.96 | 0.00 | 0.00 | 0.52 | 0.08 | 26 | Fibroblast |
| Casc5         | 0.97 | 0.00 | 0.00 | 0.39 | 0.05 | 26 | Fibroblast |
| Spc24         | 0.91 | 0.00 | 0.00 | 0.41 | 0.05 | 26 | Fibroblast |
| Ndc80         | 0.93 | 0.00 | 0.00 | 0.36 | 0.04 | 26 | Fibroblast |
| H2-Eb1        | 1.09 | 0.00 | 0.00 | 0.48 | 0.07 | 26 | Fibroblast |
| Ccnb2         | 1.05 | 0.00 | 0.00 | 0.44 | 0.06 | 26 | Fibroblast |
| Rrm2          | 1.07 | 0.00 | 0.00 | 0.39 | 0.05 | 26 | Fibroblast |
| Sgol2         | 0.94 | 0.00 | 0.00 | 0.36 | 0.04 | 26 | Fibroblast |
| Uchl3         | 1.02 | 0.00 | 0.00 | 0.46 | 0.07 | 26 | Fibroblast |
| Hist1h4i      | 0.72 | 0.00 | 0.00 | 0.27 | 0.02 | 26 | Fibroblast |
| H2-DMb2       | 0.80 | 0.00 | 0.00 | 0.25 | 0.02 | 26 | Fibroblast |
| Cenph         | 0.81 | 0.00 | 0.00 | 0.33 | 0.04 | 26 | Fibroblast |
| A530032D15Rik | 0.72 | 0.00 | 0.00 | 0.26 | 0.02 | 26 | Fibroblast |
| Hist2h2ab     | 0.91 | 0.00 | 0.00 | 0.35 | 0.04 | 26 | Fibroblast |
| Tpx2          | 0.92 | 0.00 | 0.00 | 0.41 | 0.05 | 26 | Fibroblast |
| Fbxo5         | 0.90 | 0.00 | 0.00 | 0.37 | 0.05 | 26 | Fibroblast |
| Lrmp          | 0.78 | 0.00 | 0.00 | 0.32 | 0.03 | 26 | Fibroblast |
| Cks1b         | 1.03 | 0.00 | 0.00 | 0.54 | 0.09 | 26 | Fibroblast |

|             |      |      |      |      |      |    |            |
|-------------|------|------|------|------|------|----|------------|
| Btk         | 0.81 | 0.00 | 0.00 | 0.33 | 0.04 | 26 | Fibroblast |
| Ikzf3       | 0.73 | 0.00 | 0.00 | 0.25 | 0.02 | 26 | Fibroblast |
| Dnajc9      | 1.13 | 0.00 | 0.00 | 0.60 | 0.12 | 26 | Fibroblast |
| Kif22       | 0.67 | 0.00 | 0.00 | 0.26 | 0.03 | 26 | Fibroblast |
| Fam111a     | 1.17 | 0.00 | 0.00 | 0.68 | 0.15 | 26 | Fibroblast |
| D17H6S56E-5 | 1.29 | 0.00 | 0.00 | 0.56 | 0.10 | 26 | Fibroblast |
| Cdc20       | 0.95 | 0.00 | 0.00 | 0.37 | 0.05 | 26 | Fibroblast |
| Hist1h1d    | 1.38 | 0.00 | 0.00 | 0.54 | 0.10 | 26 | Fibroblast |
| Ckap2l      | 0.86 | 0.00 | 0.00 | 0.36 | 0.05 | 26 | Fibroblast |
| Syk         | 0.85 | 0.00 | 0.00 | 0.41 | 0.06 | 26 | Fibroblast |
| Dlgap5      | 0.74 | 0.00 | 0.00 | 0.26 | 0.03 | 26 | Fibroblast |
| Nuf2        | 0.71 | 0.00 | 0.00 | 0.29 | 0.03 | 26 | Fibroblast |
| Hist1h1e    | 1.56 | 0.00 | 0.00 | 0.66 | 0.16 | 26 | Fibroblast |
| Arhgdib     | 1.00 | 0.00 | 0.00 | 0.70 | 0.16 | 26 | Fibroblast |
| Uhrf1       | 0.77 | 0.00 | 0.00 | 0.27 | 0.03 | 26 | Fibroblast |
| Mis18bp1    | 0.76 | 0.00 | 0.00 | 0.29 | 0.03 | 26 | Fibroblast |
| Smc4        | 1.17 | 0.00 | 0.00 | 0.90 | 0.34 | 26 | Fibroblast |
| Lmnb1       | 0.96 | 0.00 | 0.00 | 0.47 | 0.09 | 26 | Fibroblast |
| Gmnn        | 0.86 | 0.00 | 0.00 | 0.42 | 0.07 | 26 | Fibroblast |
| Arhgap11a   | 0.75 | 0.00 | 0.00 | 0.32 | 0.04 | 26 | Fibroblast |
| Ebf1        | 0.76 | 0.00 | 0.00 | 0.33 | 0.05 | 26 | Fibroblast |
| Ifi30       | 1.03 | 0.00 | 0.00 | 0.52 | 0.11 | 26 | Fibroblast |
| Apobec3     | 0.89 | 0.00 | 0.00 | 0.44 | 0.08 | 26 | Fibroblast |
| Uchl4       | 0.89 | 0.00 | 0.00 | 0.37 | 0.06 | 26 | Fibroblast |
| Ptma        | 0.88 | 0.00 | 0.00 | 1.00 | 0.91 | 26 | Fibroblast |
| Cep55       | 0.64 | 0.00 | 0.00 | 0.25 | 0.03 | 26 | Fibroblast |
| Lig1        | 1.11 | 0.00 | 0.00 | 0.47 | 0.09 | 26 | Fibroblast |
| Cdk1        | 0.81 | 0.00 | 0.00 | 0.35 | 0.05 | 26 | Fibroblast |
| Cnp         | 0.67 | 0.00 | 0.00 | 0.35 | 0.05 | 26 | Fibroblast |
| Ifi203      | 0.89 | 0.00 | 0.00 | 0.60 | 0.14 | 26 | Fibroblast |
| Hells       | 0.85 | 0.00 | 0.00 | 0.36 | 0.06 | 26 | Fibroblast |
| Cd48        | 0.69 | 0.00 | 0.00 | 0.33 | 0.05 | 26 | Fibroblast |
| Hirip3      | 1.01 | 0.00 | 0.00 | 0.45 | 0.09 | 26 | Fibroblast |
| Mndal       | 0.90 | 0.00 | 0.00 | 0.64 | 0.16 | 26 | Fibroblast |
| Sub1        | 1.16 | 0.00 | 0.00 | 0.93 | 0.51 | 26 | Fibroblast |
| Wdr76       | 0.66 | 0.00 | 0.00 | 0.27 | 0.04 | 26 | Fibroblast |
| Rad51ap1    | 0.66 | 0.00 | 0.00 | 0.27 | 0.03 | 26 | Fibroblast |
| Al662270    | 0.72 | 0.00 | 0.00 | 0.40 | 0.07 | 26 | Fibroblast |
| Ezh2        | 0.97 | 0.00 | 0.00 | 0.67 | 0.19 | 26 | Fibroblast |
| Pim1        | 0.99 | 0.00 | 0.00 | 0.46 | 0.09 | 26 | Fibroblast |
| Parp1       | 0.83 | 0.00 | 0.00 | 0.48 | 0.10 | 26 | Fibroblast |
| Rassf4      | 0.74 | 0.00 | 0.00 | 0.29 | 0.04 | 26 | Fibroblast |
| Cmah        | 0.71 | 0.00 | 0.00 | 0.28 | 0.04 | 26 | Fibroblast |

|               |      |      |      |      |      |    |            |
|---------------|------|------|------|------|------|----|------------|
| Coro1a        | 0.75 | 0.00 | 0.00 | 0.49 | 0.10 | 26 | Fibroblast |
| Ptpn6         | 0.71 | 0.00 | 0.00 | 0.44 | 0.08 | 26 | Fibroblast |
| Anp32e        | 1.12 | 0.00 | 0.00 | 0.78 | 0.28 | 26 | Fibroblast |
| Rilpl2        | 0.76 | 0.00 | 0.00 | 0.37 | 0.07 | 26 | Fibroblast |
| Ran           | 1.04 | 0.00 | 0.00 | 0.87 | 0.38 | 26 | Fibroblast |
| Tbc1d10c      | 0.56 | 0.00 | 0.00 | 0.25 | 0.03 | 26 | Fibroblast |
| Ptpnc         | 0.63 | 0.00 | 0.00 | 0.62 | 0.15 | 26 | Fibroblast |
| Tec           | 0.67 | 0.00 | 0.00 | 0.26 | 0.03 | 26 | Fibroblast |
| Ifi2712a      | 0.81 | 0.00 | 0.00 | 0.45 | 0.09 | 26 | Fibroblast |
| Ncf4          | 0.57 | 0.00 | 0.00 | 0.26 | 0.04 | 26 | Fibroblast |
| Dut           | 0.94 | 0.00 | 0.00 | 0.42 | 0.09 | 26 | Fibroblast |
| Gm10184       | 0.78 | 0.00 | 0.00 | 0.36 | 0.07 | 26 | Fibroblast |
| Hist2h2ac     | 0.79 | 0.00 | 0.00 | 0.35 | 0.06 | 26 | Fibroblast |
| Dnmt1         | 0.88 | 0.00 | 0.00 | 0.46 | 0.10 | 26 | Fibroblast |
| Cenpw         | 0.65 | 0.00 | 0.00 | 0.31 | 0.05 | 26 | Fibroblast |
| Nucks1        | 1.00 | 0.00 | 0.00 | 0.77 | 0.28 | 26 | Fibroblast |
| Anp32b        | 0.94 | 0.00 | 0.00 | 0.93 | 0.50 | 26 | Fibroblast |
| Sec11c        | 0.93 | 0.00 | 0.00 | 0.61 | 0.18 | 26 | Fibroblast |
| Arhgap15      | 0.72 | 0.00 | 0.00 | 0.31 | 0.05 | 26 | Fibroblast |
| Knstrn        | 0.67 | 0.00 | 0.00 | 0.27 | 0.04 | 26 | Fibroblast |
| Kpna2         | 0.84 | 0.00 | 0.00 | 0.34 | 0.06 | 26 | Fibroblast |
| 1-Sep         | 0.57 | 0.00 | 0.00 | 0.27 | 0.04 | 26 | Fibroblast |
| A430104N18Rik | 0.63 | 0.00 | 0.00 | 0.36 | 0.06 | 26 | Fibroblast |
| Sp110         | 0.72 | 0.00 | 0.00 | 0.37 | 0.07 | 26 | Fibroblast |
| Gm10259       | 0.79 | 0.00 | 0.00 | 0.33 | 0.06 | 26 | Fibroblast |
| Pola1         | 0.63 | 0.00 | 0.00 | 0.28 | 0.04 | 26 | Fibroblast |
| Cenpk         | 0.62 | 0.00 | 0.00 | 0.25 | 0.04 | 26 | Fibroblast |
| Nrm           | 0.67 | 0.00 | 0.00 | 0.31 | 0.05 | 26 | Fibroblast |
| Lsp1          | 0.86 | 0.00 | 0.00 | 0.65 | 0.19 | 26 | Fibroblast |
| Ralgps2       | 0.75 | 0.00 | 0.00 | 0.37 | 0.07 | 26 | Fibroblast |
| Prim1         | 0.86 | 0.00 | 0.00 | 0.31 | 0.05 | 26 | Fibroblast |
| Snx5          | 0.85 | 0.00 | 0.00 | 0.50 | 0.13 | 26 | Fibroblast |
| Dek           | 1.06 | 0.00 | 0.00 | 0.89 | 0.50 | 26 | Fibroblast |
| Tuba1b        | 0.93 | 0.00 | 0.00 | 0.89 | 0.45 | 26 | Fibroblast |
| Pcna-ps2      | 1.16 | 0.00 | 0.00 | 0.57 | 0.18 | 26 | Fibroblast |
| Diap3         | 0.71 | 0.00 | 0.00 | 0.33 | 0.06 | 26 | Fibroblast |
| Tcof1         | 0.73 | 0.00 | 0.00 | 0.45 | 0.11 | 26 | Fibroblast |
| Hist2h2aa2    | 0.94 | 0.00 | 0.00 | 0.50 | 0.14 | 26 | Fibroblast |
| Spc25         | 0.67 | 0.00 | 0.00 | 0.29 | 0.05 | 26 | Fibroblast |
| Hist1h1c      | 1.03 | 0.00 | 0.00 | 0.45 | 0.11 | 26 | Fibroblast |
| Ncf1          | 0.65 | 0.00 | 0.00 | 0.35 | 0.07 | 26 | Fibroblast |
| Sell          | 0.65 | 0.00 | 0.00 | 0.25 | 0.04 | 26 | Fibroblast |
| Arid3a        | 0.85 | 0.00 | 0.00 | 0.43 | 0.10 | 26 | Fibroblast |

|               |      |      |      |      |      |    |            |
|---------------|------|------|------|------|------|----|------------|
| Racgap1       | 0.62 | 0.00 | 0.00 | 0.25 | 0.04 | 26 | Fibroblast |
| Trim59        | 0.66 | 0.00 | 0.00 | 0.27 | 0.04 | 26 | Fibroblast |
| H2afz         | 0.91 | 0.00 | 0.00 | 0.83 | 0.40 | 26 | Fibroblast |
| Gm4204        | 0.85 | 0.00 | 0.00 | 0.91 | 0.50 | 26 | Fibroblast |
| Sfxn1         | 0.62 | 0.00 | 0.00 | 0.34 | 0.07 | 26 | Fibroblast |
| 2700094K13Rik | 0.77 | 0.00 | 0.00 | 0.55 | 0.16 | 26 | Fibroblast |
| Pcna          | 1.05 | 0.00 | 0.00 | 0.56 | 0.18 | 26 | Fibroblast |
| Cd24a         | 0.95 | 0.00 | 0.00 | 0.48 | 0.13 | 26 | Fibroblast |
| Fam65b        | 0.52 | 0.00 | 0.00 | 0.26 | 0.04 | 26 | Fibroblast |
| Stmn1         | 0.98 | 0.00 | 0.00 | 0.65 | 0.23 | 26 | Fibroblast |
| Ass1          | 0.57 | 0.00 | 0.00 | 0.26 | 0.04 | 26 | Fibroblast |
| Capg          | 0.70 | 0.00 | 0.00 | 0.42 | 0.10 | 26 | Fibroblast |
| Ncl           | 0.82 | 0.00 | 0.00 | 0.96 | 0.78 | 26 | Fibroblast |
| Cd53          | 0.66 | 0.00 | 0.00 | 0.40 | 0.09 | 26 | Fibroblast |
| Tubb5         | 0.86 | 0.00 | 0.00 | 0.86 | 0.44 | 26 | Fibroblast |
| Dbf4          | 0.60 | 0.00 | 0.00 | 0.28 | 0.05 | 26 | Fibroblast |
| Snx2          | 0.78 | 0.00 | 0.00 | 0.53 | 0.17 | 26 | Fibroblast |
| Was           | 0.45 | 0.00 | 0.00 | 0.29 | 0.06 | 26 | Fibroblast |
| Slbp          | 0.89 | 0.00 | 0.00 | 0.49 | 0.15 | 26 | Fibroblast |
| Nap1l1        | 0.78 | 0.00 | 0.00 | 0.87 | 0.47 | 26 | Fibroblast |
| Pyhin1        | 0.53 | 0.00 | 0.00 | 0.26 | 0.05 | 26 | Fibroblast |
| Man1a         | 0.60 | 0.00 | 0.00 | 0.26 | 0.05 | 26 | Fibroblast |
| Rps5          | 0.63 | 0.00 | 0.00 | 0.97 | 0.78 | 26 | Fibroblast |
| Ckap2         | 0.62 | 0.00 | 0.00 | 0.25 | 0.05 | 26 | Fibroblast |
| Lbr           | 0.64 | 0.00 | 0.00 | 0.45 | 0.12 | 26 | Fibroblast |
| Rrm1          | 0.69 | 0.00 | 0.00 | 0.31 | 0.07 | 26 | Fibroblast |
| Ptpn18        | 0.63 | 0.00 | 0.00 | 0.49 | 0.14 | 26 | Fibroblast |
| Sh3bgrl3      | 0.71 | 0.00 | 0.00 | 0.79 | 0.34 | 26 | Fibroblast |
| Cep110        | 0.73 | 0.00 | 0.00 | 0.57 | 0.19 | 26 | Fibroblast |
| Cbx5          | 0.82 | 0.00 | 0.00 | 0.66 | 0.26 | 26 | Fibroblast |
| Rnase6        | 0.39 | 0.00 | 0.00 | 0.27 | 0.05 | 26 | Fibroblast |
| Rps26         | 0.57 | 0.00 | 0.00 | 0.99 | 0.90 | 26 | Fibroblast |
| Psmb9         | 0.67 | 0.00 | 0.00 | 0.36 | 0.09 | 26 | Fibroblast |
| Gm10123       | 0.61 | 0.00 | 0.00 | 0.97 | 0.81 | 26 | Fibroblast |
| Atad5         | 0.56 | 0.00 | 0.00 | 0.27 | 0.05 | 26 | Fibroblast |
| Serbp1        | 0.67 | 0.00 | 0.00 | 0.97 | 0.75 | 26 | Fibroblast |
| Hn1           | 0.74 | 0.00 | 0.00 | 0.57 | 0.20 | 26 | Fibroblast |
| 6-Sep         | 0.53 | 0.00 | 0.00 | 0.31 | 0.07 | 26 | Fibroblast |
| Rpl4          | 0.58 | 0.00 | 0.00 | 0.98 | 0.83 | 26 | Fibroblast |
| Mef2c         | 0.71 | 0.00 | 0.00 | 0.51 | 0.16 | 26 | Fibroblast |
| Npm1          | 0.84 | 0.00 | 0.00 | 0.89 | 0.58 | 26 | Fibroblast |
| Ppil1         | 0.53 | 0.00 | 0.00 | 0.27 | 0.06 | 26 | Fibroblast |
| Usp1          | 0.76 | 0.00 | 0.00 | 0.49 | 0.15 | 26 | Fibroblast |

|           |      |      |      |      |      |    |            |
|-----------|------|------|------|------|------|----|------------|
| Unc93b1   | 0.59 | 0.00 | 0.00 | 0.32 | 0.07 | 26 | Fibroblast |
| Serp1     | 0.67 | 0.00 | 0.00 | 0.62 | 0.23 | 26 | Fibroblast |
| Tyms      | 0.68 | 0.00 | 0.00 | 0.27 | 0.06 | 26 | Fibroblast |
| Rps26-ps1 | 0.59 | 0.00 | 0.00 | 0.98 | 0.87 | 26 | Fibroblast |
| Whsc1     | 0.77 | 0.00 | 0.00 | 0.45 | 0.14 | 26 | Fibroblast |
| Atic      | 0.53 | 0.00 | 0.00 | 0.28 | 0.06 | 26 | Fibroblast |
| Gimap4    | 0.64 | 0.00 | 0.00 | 0.54 | 0.18 | 26 | Fibroblast |
| Crip1     | 0.91 | 0.00 | 0.00 | 0.87 | 0.48 | 26 | Fibroblast |
| Nme1      | 0.71 | 0.00 | 0.00 | 0.54 | 0.19 | 26 | Fibroblast |
| Rpia      | 0.56 | 0.00 | 0.00 | 0.29 | 0.07 | 26 | Fibroblast |
| Hmga1     | 0.63 | 0.00 | 0.00 | 0.32 | 0.08 | 26 | Fibroblast |
| Mcm6      | 0.63 | 0.00 | 0.00 | 0.30 | 0.07 | 26 | Fibroblast |
| Arhgap30  | 0.49 | 0.00 | 0.00 | 0.39 | 0.10 | 26 | Fibroblast |
| Gmfg      | 0.68 | 0.00 | 0.00 | 0.46 | 0.14 | 26 | Fibroblast |
| Rps3a1    | 0.53 | 0.00 | 0.00 | 0.97 | 0.85 | 26 | Fibroblast |
| Mcm7      | 0.70 | 0.00 | 0.00 | 0.31 | 0.07 | 26 | Fibroblast |
| Sh3bp5    | 0.68 | 0.00 | 0.00 | 0.56 | 0.19 | 26 | Fibroblast |
| Hmgn2     | 0.72 | 0.00 | 0.00 | 0.82 | 0.43 | 26 | Fibroblast |
| Tuba1c    | 0.72 | 0.00 | 0.00 | 0.72 | 0.32 | 26 | Fibroblast |
| Psmb8     | 0.63 | 0.00 | 0.00 | 0.54 | 0.18 | 26 | Fibroblast |
| Pld4      | 0.51 | 0.00 | 0.00 | 0.26 | 0.06 | 26 | Fibroblast |
| Nol7      | 0.79 | 0.00 | 0.00 | 0.73 | 0.35 | 26 | Fibroblast |
| Ppia      | 0.58 | 0.00 | 0.00 | 0.96 | 0.80 | 26 | Fibroblast |
| Dctpp1    | 0.55 | 0.00 | 0.00 | 0.26 | 0.05 | 26 | Fibroblast |
| Ezr       | 0.67 | 0.00 | 0.00 | 0.59 | 0.22 | 26 | Fibroblast |
| Ranbp1    | 0.80 | 0.00 | 0.00 | 0.65 | 0.29 | 26 | Fibroblast |
| Chd1      | 0.71 | 0.00 | 0.00 | 0.50 | 0.17 | 26 | Fibroblast |
| Ncapd3    | 0.57 | 0.00 | 0.00 | 0.26 | 0.06 | 26 | Fibroblast |
| Ddx39     | 0.58 | 0.00 | 0.00 | 0.34 | 0.09 | 26 | Fibroblast |
| Hcls1     | 0.45 | 0.00 | 0.00 | 0.31 | 0.07 | 26 | Fibroblast |
| Pa2g4     | 0.77 | 0.00 | 0.00 | 0.62 | 0.26 | 26 | Fibroblast |
| Dnajc2    | 0.75 | 0.00 | 0.00 | 0.53 | 0.20 | 26 | Fibroblast |
| Nubp1     | 0.50 | 0.00 | 0.00 | 0.26 | 0.06 | 26 | Fibroblast |
| Coro2a    | 0.52 | 0.00 | 0.00 | 0.28 | 0.07 | 26 | Fibroblast |
| Rpl14     | 0.50 | 0.00 | 0.00 | 0.98 | 0.84 | 26 | Fibroblast |
| Nasp      | 0.78 | 0.00 | 0.00 | 0.53 | 0.20 | 26 | Fibroblast |
| Atad2     | 0.63 | 0.00 | 0.00 | 0.31 | 0.08 | 26 | Fibroblast |
| Apbb1ip   | 0.44 | 0.00 | 0.00 | 0.36 | 0.09 | 26 | Fibroblast |
| Lcp1      | 0.59 | 0.00 | 0.00 | 0.59 | 0.23 | 26 | Fibroblast |
| Rps11     | 0.58 | 0.00 | 0.00 | 0.93 | 0.76 | 26 | Fibroblast |
| Smchd1    | 0.63 | 0.00 | 0.00 | 0.47 | 0.16 | 26 | Fibroblast |
| Csk       | 0.47 | 0.00 | 0.00 | 0.27 | 0.06 | 26 | Fibroblast |
| Rpsa-ps10 | 0.61 | 0.00 | 0.00 | 0.94 | 0.68 | 26 | Fibroblast |

|           |      |      |      |      |      |    |            |
|-----------|------|------|------|------|------|----|------------|
| Pycard    | 0.56 | 0.00 | 0.00 | 0.34 | 0.09 | 26 | Fibroblast |
| Gm10282   | 0.71 | 0.00 | 0.00 | 0.77 | 0.40 | 26 | Fibroblast |
| Strbp     | 0.66 | 0.00 | 0.00 | 0.39 | 0.12 | 26 | Fibroblast |
| Ssrp1     | 0.66 | 0.00 | 0.00 | 0.55 | 0.21 | 26 | Fibroblast |
| Gnl3      | 0.62 | 0.00 | 0.00 | 0.39 | 0.12 | 26 | Fibroblast |
| Rps3a2    | 0.49 | 0.00 | 0.00 | 0.96 | 0.82 | 26 | Fibroblast |
| Actb      | 0.42 | 0.00 | 0.00 | 1.00 | 0.98 | 26 | Fibroblast |
| Fam107b   | 0.50 | 0.00 | 0.00 | 0.29 | 0.07 | 26 | Fibroblast |
| Fermt3    | 0.50 | 0.00 | 0.00 | 0.27 | 0.06 | 26 | Fibroblast |
| Vrk1      | 0.51 | 0.00 | 0.00 | 0.30 | 0.08 | 26 | Fibroblast |
| Itga4     | 0.42 | 0.00 | 0.00 | 0.35 | 0.10 | 26 | Fibroblast |
| Ckap5     | 0.64 | 0.00 | 0.00 | 0.38 | 0.11 | 26 | Fibroblast |
| Arl6ip1   | 0.88 | 0.00 | 0.00 | 0.84 | 0.52 | 26 | Fibroblast |
| Set       | 0.77 | 0.00 | 0.00 | 0.69 | 0.34 | 26 | Fibroblast |
| H2-K1     | 0.64 | 0.00 | 0.00 | 0.70 | 0.32 | 26 | Fibroblast |
| Dkc1      | 0.58 | 0.00 | 0.00 | 0.38 | 0.12 | 26 | Fibroblast |
| Uchl5     | 0.53 | 0.00 | 0.00 | 0.38 | 0.12 | 26 | Fibroblast |
| Rad21     | 0.64 | 0.00 | 0.00 | 0.57 | 0.23 | 26 | Fibroblast |
| Nop58     | 0.82 | 0.00 | 0.00 | 0.59 | 0.26 | 26 | Fibroblast |
| Fam49b    | 0.45 | 0.00 | 0.00 | 0.36 | 0.11 | 26 | Fibroblast |
| Tmpo      | 0.70 | 0.00 | 0.00 | 0.44 | 0.15 | 26 | Fibroblast |
| Cd55      | 0.63 | 0.00 | 0.00 | 0.29 | 0.07 | 26 | Fibroblast |
| Pabpc1    | 0.50 | 0.00 | 0.00 | 0.97 | 0.81 | 26 | Fibroblast |
| Lrrc58    | 0.47 | 0.00 | 0.00 | 1.00 | 0.91 | 26 | Fibroblast |
| Pkig      | 0.54 | 0.00 | 0.00 | 0.31 | 0.09 | 26 | Fibroblast |
| Hsp90aa1  | 0.65 | 0.00 | 0.00 | 0.80 | 0.47 | 26 | Fibroblast |
| Nop56     | 0.74 | 0.00 | 0.00 | 0.50 | 0.20 | 26 | Fibroblast |
| Elf1      | 0.57 | 0.00 | 0.00 | 0.53 | 0.20 | 26 | Fibroblast |
| H2afv     | 0.63 | 0.00 | 0.00 | 0.64 | 0.28 | 26 | Fibroblast |
| Srsf3     | 0.66 | 0.00 | 0.00 | 0.79 | 0.45 | 26 | Fibroblast |
| Rbm3      | 0.65 | 0.00 | 0.00 | 0.74 | 0.41 | 26 | Fibroblast |
| Rangap1   | 0.56 | 0.00 | 0.00 | 0.29 | 0.08 | 26 | Fibroblast |
| Cotl1     | 0.49 | 0.00 | 0.00 | 0.49 | 0.18 | 26 | Fibroblast |
| Ly6e      | 0.51 | 0.00 | 0.00 | 0.84 | 0.42 | 26 | Fibroblast |
| Mcm3      | 0.52 | 0.00 | 0.00 | 0.27 | 0.07 | 26 | Fibroblast |
| Snrpd1    | 0.58 | 0.00 | 0.00 | 0.51 | 0.20 | 26 | Fibroblast |
| Pfn1      | 0.63 | 0.00 | 0.00 | 0.77 | 0.46 | 26 | Fibroblast |
| Tubb4b    | 0.57 | 0.00 | 0.00 | 0.49 | 0.19 | 26 | Fibroblast |
| Swap70    | 0.62 | 0.00 | 0.00 | 0.35 | 0.11 | 26 | Fibroblast |
| Gm13139   | 0.45 | 0.00 | 0.00 | 0.27 | 0.07 | 26 | Fibroblast |
| Hnrnpa2b1 | 0.56 | 0.00 | 0.00 | 0.93 | 0.72 | 26 | Fibroblast |
| Hmgb1     | 0.60 | 0.00 | 0.00 | 0.88 | 0.61 | 26 | Fibroblast |
| Gm5641    | 0.68 | 0.00 | 0.00 | 0.70 | 0.37 | 26 | Fibroblast |

|               |      |      |      |      |      |    |            |
|---------------|------|------|------|------|------|----|------------|
| Ak2           | 0.51 | 0.00 | 0.00 | 0.43 | 0.15 | 26 | Fibroblast |
| Rpl13a        | 0.41 | 0.00 | 0.00 | 0.97 | 0.87 | 26 | Fibroblast |
| Gar1          | 0.45 | 0.00 | 0.00 | 0.26 | 0.07 | 26 | Fibroblast |
| Hnrnpu        | 0.66 | 0.00 | 0.00 | 0.88 | 0.64 | 26 | Fibroblast |
| 4930523C07Rik | 0.58 | 0.00 | 0.00 | 0.48 | 0.19 | 26 | Fibroblast |
| Rabgap1l      | 0.53 | 0.00 | 0.00 | 0.34 | 0.11 | 26 | Fibroblast |
| Brd8          | 0.61 | 0.00 | 0.00 | 0.49 | 0.19 | 26 | Fibroblast |
| Gm12355       | 0.61 | 0.00 | 0.00 | 0.58 | 0.26 | 26 | Fibroblast |
| Mycbp2        | 0.66 | 0.00 | 0.00 | 0.54 | 0.23 | 26 | Fibroblast |
| Ska2          | 0.52 | 0.00 | 0.00 | 0.25 | 0.07 | 26 | Fibroblast |
| Eef1b2        | 0.50 | 0.00 | 0.00 | 0.89 | 0.65 | 26 | Fibroblast |
| Snrpe         | 0.55 | 0.00 | 0.00 | 0.70 | 0.36 | 26 | Fibroblast |
| Mif           | 0.64 | 0.00 | 0.00 | 0.46 | 0.19 | 26 | Fibroblast |
| Zfp706        | 0.63 | 0.00 | 0.00 | 0.64 | 0.32 | 26 | Fibroblast |
| Supt16        | 0.63 | 0.00 | 0.00 | 0.56 | 0.25 | 26 | Fibroblast |
| Hmga1-rs1     | 0.48 | 0.00 | 0.00 | 0.27 | 0.08 | 26 | Fibroblast |
| Rpl32         | 0.45 | 0.00 | 0.00 | 0.95 | 0.84 | 26 | Fibroblast |
| Emp3          | 0.63 | 0.00 | 0.00 | 0.51 | 0.21 | 26 | Fibroblast |
| Slfn2         | 0.41 | 0.00 | 0.00 | 0.39 | 0.13 | 26 | Fibroblast |
| Gm7729        | 0.53 | 0.00 | 0.00 | 0.36 | 0.12 | 26 | Fibroblast |
| Wdr89         | 0.39 | 0.00 | 0.00 | 0.98 | 0.89 | 26 | Fibroblast |
| Hat1          | 0.43 | 0.00 | 0.00 | 0.26 | 0.07 | 26 | Fibroblast |
| Exosc3        | 0.54 | 0.00 | 0.00 | 0.26 | 0.07 | 26 | Fibroblast |
| Snx30         | 0.48 | 0.00 | 0.00 | 0.33 | 0.11 | 26 | Fibroblast |
| Calm1         | 0.42 | 0.00 | 0.00 | 0.99 | 0.87 | 26 | Fibroblast |
| Hjurp         | 0.51 | 0.00 | 0.00 | 0.40 | 0.14 | 26 | Fibroblast |
| Tnfaip8       | 0.51 | 0.00 | 0.00 | 0.33 | 0.11 | 26 | Fibroblast |
| Gtf2f1        | 0.56 | 0.00 | 0.00 | 0.51 | 0.21 | 26 | Fibroblast |
| Gm6625        | 0.62 | 0.00 | 0.00 | 0.55 | 0.25 | 26 | Fibroblast |
| Erp29         | 0.54 | 0.00 | 0.00 | 0.57 | 0.26 | 26 | Fibroblast |
| Ctcf          | 0.62 | 0.00 | 0.00 | 0.53 | 0.23 | 26 | Fibroblast |
| Ptbp3         | 0.60 | 0.00 | 0.00 | 0.70 | 0.36 | 26 | Fibroblast |
| Sms           | 0.42 | 0.00 | 0.00 | 0.35 | 0.12 | 26 | Fibroblast |
| Rps16         | 0.42 | 0.00 | 0.00 | 0.98 | 0.84 | 26 | Fibroblast |
| Tipin         | 0.60 | 0.00 | 0.00 | 0.31 | 0.10 | 26 | Fibroblast |
| Snrpa1        | 0.53 | 0.00 | 0.00 | 0.39 | 0.14 | 26 | Fibroblast |
| Gm8730        | 0.44 | 0.00 | 0.00 | 0.95 | 0.82 | 26 | Fibroblast |
| Eef1g         | 0.61 | 0.00 | 0.00 | 0.77 | 0.49 | 26 | Fibroblast |
| Eif5a         | 0.58 | 0.00 | 0.00 | 0.64 | 0.34 | 26 | Fibroblast |
| Snn           | 0.43 | 0.00 | 0.00 | 0.27 | 0.08 | 26 | Fibroblast |
| Arhgap17      | 0.52 | 0.00 | 0.00 | 0.44 | 0.18 | 26 | Fibroblast |
| Rps3a3        | 0.43 | 0.00 | 0.00 | 0.93 | 0.78 | 26 | Fibroblast |
| Arpc5l        | 0.52 | 0.00 | 0.00 | 0.42 | 0.17 | 26 | Fibroblast |

|           |      |      |      |      |      |    |            |
|-----------|------|------|------|------|------|----|------------|
| Rps12-ps3 | 0.45 | 0.00 | 0.00 | 0.95 | 0.79 | 26 | Fibroblast |
| Klf2      | 0.56 | 0.00 | 0.00 | 0.48 | 0.20 | 26 | Fibroblast |
| Rps3      | 0.42 | 0.00 | 0.00 | 0.95 | 0.83 | 26 | Fibroblast |
| Limd2     | 0.48 | 0.00 | 0.00 | 0.41 | 0.15 | 26 | Fibroblast |
| H2afy     | 0.59 | 0.00 | 0.00 | 0.46 | 0.20 | 26 | Fibroblast |
| Impdh2    | 0.41 | 0.00 | 0.00 | 0.31 | 0.10 | 26 | Fibroblast |
| Snrpf     | 0.51 | 0.00 | 0.00 | 0.59 | 0.28 | 26 | Fibroblast |
| Crlf3     | 0.41 | 0.00 | 0.00 | 0.38 | 0.14 | 26 | Fibroblast |
| Rps9      | 0.36 | 0.00 | 0.00 | 0.98 | 0.91 | 26 | Fibroblast |
| Gm10275   | 0.45 | 0.00 | 0.00 | 0.89 | 0.66 | 26 | Fibroblast |
| H2-D1     | 0.43 | 0.00 | 0.00 | 0.85 | 0.49 | 26 | Fibroblast |
| Gm10260   | 0.52 | 0.00 | 0.00 | 0.79 | 0.49 | 26 | Fibroblast |
| Smarca5   | 0.58 | 0.00 | 0.00 | 0.62 | 0.30 | 26 | Fibroblast |
| Gm10269   | 0.40 | 0.00 | 0.00 | 0.96 | 0.79 | 26 | Fibroblast |
| Rbbp7     | 0.55 | 0.00 | 0.00 | 0.55 | 0.26 | 26 | Fibroblast |
| Sp100     | 0.37 | 0.00 | 0.00 | 0.28 | 0.08 | 26 | Fibroblast |
| Ccdc34    | 0.47 | 0.00 | 0.00 | 0.38 | 0.14 | 26 | Fibroblast |
| Cep57     | 0.50 | 0.00 | 0.00 | 0.32 | 0.11 | 26 | Fibroblast |
| Rpf2      | 0.49 | 0.00 | 0.00 | 0.28 | 0.09 | 26 | Fibroblast |
| Exosc8    | 0.39 | 0.00 | 0.00 | 0.27 | 0.08 | 26 | Fibroblast |
| Asnsd1    | 0.46 | 0.00 | 0.00 | 0.32 | 0.11 | 26 | Fibroblast |
| Tmsb4x    | 0.32 | 0.00 | 0.00 | 0.99 | 0.89 | 26 | Fibroblast |
| Gimap1    | 0.40 | 0.00 | 0.00 | 0.39 | 0.14 | 26 | Fibroblast |
| Gm5611    | 0.64 | 0.00 | 0.00 | 0.63 | 0.36 | 26 | Fibroblast |
| Rplp1     | 0.35 | 0.00 | 0.00 | 0.99 | 0.90 | 26 | Fibroblast |
| Rps2      | 0.49 | 0.00 | 0.00 | 0.88 | 0.67 | 26 | Fibroblast |
| Rasgrp2   | 0.49 | 0.00 | 0.00 | 0.30 | 0.10 | 26 | Fibroblast |
| Gnb2l1    | 0.47 | 0.00 | 0.00 | 0.91 | 0.65 | 26 | Fibroblast |
| Gm6793    | 0.67 | 0.00 | 0.00 | 0.58 | 0.30 | 26 | Fibroblast |
| Rplp0     | 0.41 | 0.00 | 0.00 | 0.96 | 0.83 | 26 | Fibroblast |
| Grap      | 0.45 | 0.00 | 0.00 | 0.37 | 0.13 | 26 | Fibroblast |
| Rpl8      | 0.41 | 0.00 | 0.00 | 0.95 | 0.79 | 26 | Fibroblast |
| Gimap9    | 0.38 | 0.00 | 0.00 | 0.25 | 0.07 | 26 | Fibroblast |
| Baz1a     | 0.51 | 0.00 | 0.00 | 0.35 | 0.13 | 26 | Fibroblast |
| Tpm3      | 0.49 | 0.00 | 0.00 | 0.92 | 0.70 | 26 | Fibroblast |
| Erdr1     | 0.57 | 0.00 | 0.00 | 0.29 | 0.09 | 26 | Fibroblast |
| Fbl       | 0.44 | 0.00 | 0.00 | 0.26 | 0.08 | 26 | Fibroblast |
| Yeats4    | 0.54 | 0.00 | 0.00 | 0.44 | 0.19 | 26 | Fibroblast |
| Nudt21    | 0.42 | 0.00 | 0.00 | 0.34 | 0.12 | 26 | Fibroblast |
| Lsm4      | 0.52 | 0.00 | 0.00 | 0.47 | 0.21 | 26 | Fibroblast |
| Actr3     | 0.47 | 0.00 | 0.00 | 0.64 | 0.33 | 26 | Fibroblast |
| G3bp1     | 0.54 | 0.00 | 0.00 | 0.42 | 0.17 | 26 | Fibroblast |
| Gm8186    | 0.52 | 0.00 | 0.00 | 0.68 | 0.39 | 26 | Fibroblast |

|                |      |      |      |      |      |    |            |
|----------------|------|------|------|------|------|----|------------|
| Hnrnpf         | 0.49 | 0.00 | 0.00 | 0.66 | 0.34 | 26 | Fibroblast |
| Rpsa           | 0.48 | 0.00 | 0.00 | 0.86 | 0.62 | 26 | Fibroblast |
| mt-Co1         | 0.34 | 0.00 | 0.00 | 0.98 | 0.95 | 26 | Fibroblast |
| Gm8991         | 0.56 | 0.00 | 0.00 | 0.49 | 0.23 | 26 | Fibroblast |
| Cyba           | 0.40 | 0.00 | 0.00 | 0.61 | 0.30 | 26 | Fibroblast |
| Emg1           | 0.46 | 0.00 | 0.00 | 0.39 | 0.16 | 26 | Fibroblast |
| Chchd10        | 0.45 | 0.00 | 0.00 | 0.36 | 0.13 | 26 | Fibroblast |
| 5830418K08Rik  | 0.40 | 0.00 | 0.00 | 0.27 | 0.09 | 26 | Fibroblast |
| Smc1a          | 0.51 | 0.00 | 0.00 | 0.66 | 0.35 | 26 | Fibroblast |
| Fnbp1          | 0.32 | 0.00 | 0.00 | 0.27 | 0.09 | 26 | Fibroblast |
| Utp3           | 0.51 | 0.00 | 0.00 | 0.49 | 0.22 | 26 | Fibroblast |
| Rps6           | 0.36 | 0.00 | 0.00 | 0.96 | 0.82 | 26 | Fibroblast |
| Fkbp3          | 0.55 | 0.00 | 0.00 | 0.59 | 0.30 | 26 | Fibroblast |
| Naa50          | 0.50 | 0.00 | 0.00 | 0.34 | 0.13 | 26 | Fibroblast |
| Hspa4          | 0.52 | 0.00 | 0.00 | 0.51 | 0.23 | 26 | Fibroblast |
| Nhp2           | 0.44 | 0.00 | 0.00 | 0.32 | 0.12 | 26 | Fibroblast |
| Tcf3           | 0.42 | 0.00 | 0.00 | 0.25 | 0.08 | 26 | Fibroblast |
| 9930111J21Rik2 | 0.41 | 0.00 | 0.00 | 0.33 | 0.12 | 26 | Fibroblast |
| Nsmce1         | 0.47 | 0.00 | 0.00 | 0.35 | 0.14 | 26 | Fibroblast |
| Gm9242         | 0.59 | 0.00 | 0.00 | 0.49 | 0.24 | 26 | Fibroblast |
| Ddx27          | 0.45 | 0.00 | 0.00 | 0.33 | 0.12 | 26 | Fibroblast |
| Eml4           | 0.49 | 0.00 | 0.00 | 0.42 | 0.18 | 26 | Fibroblast |
| Gm9843         | 0.31 | 0.00 | 0.00 | 0.99 | 0.93 | 26 | Fibroblast |
| Cytip          | 0.39 | 0.00 | 0.00 | 0.29 | 0.10 | 26 | Fibroblast |
| Dhx9           | 0.47 | 0.00 | 0.00 | 0.44 | 0.19 | 26 | Fibroblast |
| Rpl10a         | 0.43 | 0.00 | 0.00 | 0.93 | 0.74 | 26 | Fibroblast |
| 2700029M09Rik  | 0.46 | 0.00 | 0.00 | 0.34 | 0.13 | 26 | Fibroblast |
| mt-Co3         | 0.36 | 0.00 | 0.00 | 0.98 | 0.89 | 26 | Fibroblast |
| S100a10        | 0.56 | 0.00 | 0.00 | 0.67 | 0.38 | 26 | Fibroblast |
| Mybbp1a        | 0.48 | 0.00 | 0.00 | 0.34 | 0.13 | 26 | Fibroblast |
| Gclm           | 0.52 | 0.00 | 0.00 | 0.69 | 0.42 | 26 | Fibroblast |
| Rsl1d1         | 0.49 | 0.00 | 0.00 | 0.55 | 0.27 | 26 | Fibroblast |
| Rps18          | 0.44 | 0.00 | 0.00 | 0.87 | 0.65 | 26 | Fibroblast |
| Stk38          | 0.57 | 0.00 | 0.00 | 0.44 | 0.20 | 26 | Fibroblast |
| Lsm5           | 0.52 | 0.00 | 0.00 | 0.31 | 0.12 | 26 | Fibroblast |
| Hist1h2al      | 0.38 | 0.00 | 0.00 | 0.29 | 0.10 | 26 | Fibroblast |
| Gspt1          | 0.54 | 0.00 | 0.00 | 0.37 | 0.15 | 26 | Fibroblast |
| Gm10073        | 0.34 | 0.00 | 0.00 | 0.98 | 0.86 | 26 | Fibroblast |
| Gm4070         | 0.42 | 0.00 | 0.00 | 0.33 | 0.12 | 26 | Fibroblast |
| Rpl5           | 0.37 | 0.00 | 0.00 | 0.91 | 0.74 | 26 | Fibroblast |
| Mak16          | 0.46 | 0.00 | 0.00 | 0.32 | 0.12 | 26 | Fibroblast |
| Taf1d          | 0.49 | 0.00 | 0.00 | 0.48 | 0.23 | 26 | Fibroblast |
| Rps20          | 0.39 | 0.00 | 0.00 | 0.95 | 0.79 | 26 | Fibroblast |

|            |      |      |      |      |      |    |            |
|------------|------|------|------|------|------|----|------------|
| Rpl22      | 0.39 | 0.00 | 0.00 | 0.92 | 0.79 | 26 | Fibroblast |
| Wdr43      | 0.42 | 0.00 | 0.00 | 0.34 | 0.13 | 26 | Fibroblast |
| mt-Co2     | 0.37 | 0.00 | 0.00 | 0.95 | 0.77 | 26 | Fibroblast |
| Tpm3-rs7   | 0.44 | 0.00 | 0.00 | 0.90 | 0.69 | 26 | Fibroblast |
| Rad50      | 0.45 | 0.00 | 0.00 | 0.44 | 0.19 | 26 | Fibroblast |
| Banf1      | 0.46 | 0.00 | 0.00 | 0.56 | 0.29 | 26 | Fibroblast |
| Gm2000     | 0.33 | 0.00 | 0.00 | 0.97 | 0.84 | 26 | Fibroblast |
| Orc5       | 0.44 | 0.00 | 0.00 | 0.83 | 0.55 | 26 | Fibroblast |
| Lsm2       | 0.45 | 0.00 | 0.00 | 0.26 | 0.09 | 26 | Fibroblast |
| Trnt1      | 0.45 | 0.00 | 0.00 | 0.32 | 0.12 | 26 | Fibroblast |
| Rps12      | 0.40 | 0.00 | 0.00 | 0.90 | 0.69 | 26 | Fibroblast |
| Grb2       | 0.43 | 0.00 | 0.00 | 0.41 | 0.18 | 26 | Fibroblast |
| Hnrnpd     | 0.51 | 0.00 | 0.00 | 0.55 | 0.29 | 26 | Fibroblast |
| Pbdc1      | 0.46 | 0.00 | 0.00 | 0.33 | 0.13 | 26 | Fibroblast |
| Ndufs8     | 0.42 | 0.00 | 0.00 | 0.40 | 0.17 | 26 | Fibroblast |
| Vbp1       | 0.40 | 0.00 | 0.00 | 0.37 | 0.15 | 26 | Fibroblast |
| Ccm2       | 0.35 | 0.00 | 0.00 | 0.31 | 0.12 | 26 | Fibroblast |
| Plekha2    | 0.40 | 0.00 | 0.00 | 0.28 | 0.10 | 26 | Fibroblast |
| Lyn        | 0.31 | 0.00 | 0.00 | 0.34 | 0.13 | 26 | Fibroblast |
| Smarca4    | 0.44 | 0.00 | 0.00 | 0.40 | 0.17 | 26 | Fibroblast |
| Cpsf2      | 0.47 | 0.00 | 0.00 | 0.32 | 0.13 | 26 | Fibroblast |
| Pgl3       | 0.43 | 0.00 | 0.00 | 0.39 | 0.17 | 26 | Fibroblast |
| Mrpl18     | 0.49 | 0.00 | 0.00 | 0.44 | 0.21 | 26 | Fibroblast |
| Npm3       | 0.34 | 0.00 | 0.00 | 0.27 | 0.10 | 26 | Fibroblast |
| Parp2      | 0.35 | 0.00 | 0.00 | 0.29 | 0.10 | 26 | Fibroblast |
| Naa10      | 0.30 | 0.00 | 0.00 | 0.26 | 0.09 | 26 | Fibroblast |
| Rps18-ps3  | 0.45 | 0.00 | 0.00 | 0.79 | 0.56 | 26 | Fibroblast |
| Rps10-ps1  | 0.35 | 0.00 | 0.00 | 0.93 | 0.77 | 26 | Fibroblast |
| Nudc       | 0.42 | 0.00 | 0.00 | 0.44 | 0.21 | 26 | Fibroblast |
| Rpl18a     | 0.32 | 0.00 | 0.00 | 0.98 | 0.82 | 26 | Fibroblast |
| Hspa14     | 0.40 | 0.00 | 0.00 | 0.29 | 0.11 | 26 | Fibroblast |
| Rpl6       | 0.31 | 0.00 | 0.00 | 0.97 | 0.87 | 26 | Fibroblast |
| Rbm17      | 0.47 | 0.00 | 0.00 | 0.49 | 0.24 | 26 | Fibroblast |
| Gm9396     | 0.40 | 0.00 | 0.00 | 0.79 | 0.54 | 26 | Fibroblast |
| Gvin1      | 0.35 | 0.00 | 0.00 | 0.31 | 0.12 | 26 | Fibroblast |
| Dnajc7     | 0.40 | 0.00 | 0.00 | 0.46 | 0.21 | 26 | Fibroblast |
| Rpl22l1    | 0.44 | 0.00 | 0.00 | 0.80 | 0.56 | 26 | Fibroblast |
| Rplp2      | 0.33 | 0.00 | 0.00 | 0.94 | 0.81 | 26 | Fibroblast |
| Rpl18      | 0.40 | 0.00 | 0.00 | 0.85 | 0.64 | 26 | Fibroblast |
| Gadd45gip1 | 0.41 | 0.00 | 0.00 | 0.36 | 0.16 | 26 | Fibroblast |
| Mrpl40     | 0.45 | 0.00 | 0.00 | 0.29 | 0.11 | 26 | Fibroblast |
| Clic1      | 0.42 | 0.00 | 0.00 | 0.66 | 0.38 | 26 | Fibroblast |
| Cenpc1     | 0.37 | 0.00 | 0.00 | 0.25 | 0.09 | 26 | Fibroblast |

|          |      |      |      |      |      |    |            |
|----------|------|------|------|------|------|----|------------|
| Mtf2     | 0.41 | 0.00 | 0.00 | 0.40 | 0.18 | 26 | Fibroblast |
| Iws1     | 0.37 | 0.00 | 0.00 | 0.38 | 0.16 | 26 | Fibroblast |
| C1qbp    | 0.45 | 0.00 | 0.00 | 0.31 | 0.12 | 26 | Fibroblast |
| Eif5     | 0.45 | 0.00 | 0.00 | 0.63 | 0.37 | 26 | Fibroblast |
| Ccnd2    | 0.47 | 0.00 | 0.00 | 0.54 | 0.28 | 26 | Fibroblast |
| Fau      | 0.29 | 0.00 | 0.00 | 0.98 | 0.87 | 26 | Fibroblast |
| Rpl3     | 0.41 | 0.00 | 0.00 | 0.84 | 0.63 | 26 | Fibroblast |
| Dtymk    | 0.46 | 0.00 | 0.00 | 0.33 | 0.14 | 26 | Fibroblast |
| Srsf2    | 0.49 | 0.00 | 0.00 | 0.65 | 0.38 | 26 | Fibroblast |
| Slmo2    | 0.36 | 0.00 | 0.00 | 0.26 | 0.09 | 26 | Fibroblast |
| Rpa3     | 0.49 | 0.00 | 0.00 | 0.31 | 0.13 | 26 | Fibroblast |
| Pgk1-rs7 | 0.31 | 0.00 | 0.00 | 0.27 | 0.10 | 26 | Fibroblast |
| Hprt     | 0.36 | 0.00 | 0.00 | 0.33 | 0.14 | 26 | Fibroblast |
| Pgk1     | 0.32 | 0.00 | 0.00 | 0.30 | 0.12 | 26 | Fibroblast |
| Ctsz     | 0.44 | 0.00 | 0.00 | 0.36 | 0.15 | 26 | Fibroblast |
| Rps15a   | 0.30 | 0.00 | 0.00 | 0.95 | 0.81 | 26 | Fibroblast |
| Lsm6     | 0.44 | 0.00 | 0.00 | 0.33 | 0.13 | 26 | Fibroblast |
| Mdh1     | 0.36 | 0.00 | 0.00 | 0.41 | 0.19 | 26 | Fibroblast |
| Hnrnpc   | 0.40 | 0.00 | 0.00 | 0.72 | 0.44 | 26 | Fibroblast |
| Rps13    | 0.37 | 0.00 | 0.00 | 0.84 | 0.64 | 26 | Fibroblast |
| Ddx21    | 0.46 | 0.00 | 0.00 | 0.51 | 0.26 | 26 | Fibroblast |
| Il2rg    | 0.30 | 0.00 | 0.00 | 0.27 | 0.10 | 26 | Fibroblast |
| Ppp1cc   | 0.33 | 0.00 | 0.00 | 0.27 | 0.10 | 26 | Fibroblast |
| Bola2    | 0.38 | 0.00 | 0.00 | 0.37 | 0.16 | 26 | Fibroblast |
| Slc25a5  | 0.38 | 0.00 | 0.00 | 0.82 | 0.59 | 26 | Fibroblast |
| Smc3     | 0.39 | 0.00 | 0.00 | 0.66 | 0.38 | 26 | Fibroblast |
| Snrpg    | 0.45 | 0.00 | 0.00 | 0.64 | 0.39 | 26 | Fibroblast |
| Gm10068  | 0.38 | 0.00 | 0.00 | 0.57 | 0.30 | 26 | Fibroblast |
| Hnrnpa1  | 0.44 | 0.00 | 0.00 | 0.51 | 0.27 | 26 | Fibroblast |
| Lman2    | 0.40 | 0.00 | 0.00 | 0.33 | 0.14 | 26 | Fibroblast |
| Gpx1     | 0.36 | 0.00 | 0.00 | 0.72 | 0.43 | 26 | Fibroblast |
| Gdi2     | 0.40 | 0.00 | 0.00 | 0.59 | 0.33 | 26 | Fibroblast |
| Xist     | 0.44 | 0.00 | 0.00 | 0.77 | 0.51 | 26 | Fibroblast |
| Trp53    | 0.31 | 0.00 | 0.00 | 0.37 | 0.16 | 26 | Fibroblast |
| Lsm3     | 0.31 | 0.00 | 0.00 | 0.28 | 0.11 | 26 | Fibroblast |
| Setd8    | 0.36 | 0.00 | 0.00 | 0.29 | 0.12 | 26 | Fibroblast |
| Bin1     | 0.43 | 0.00 | 0.00 | 0.28 | 0.11 | 26 | Fibroblast |
| Lyar     | 0.46 | 0.00 | 0.00 | 0.35 | 0.16 | 26 | Fibroblast |
| Gm5506   | 0.35 | 0.00 | 0.00 | 0.34 | 0.14 | 26 | Fibroblast |
| Gabpb2   | 0.41 | 0.00 | 0.00 | 0.26 | 0.10 | 26 | Fibroblast |
| Stk4     | 0.33 | 0.00 | 0.00 | 0.34 | 0.14 | 26 | Fibroblast |
| Shisa5   | 0.32 | 0.00 | 0.00 | 0.43 | 0.21 | 26 | Fibroblast |
| Naa15    | 0.36 | 0.00 | 0.00 | 0.45 | 0.22 | 26 | Fibroblast |

|             |      |      |      |      |      |    |            |
|-------------|------|------|------|------|------|----|------------|
| Hspd1       | 0.49 | 0.00 | 0.00 | 0.47 | 0.25 | 26 | Fibroblast |
| Mrp63       | 0.37 | 0.00 | 0.00 | 0.34 | 0.15 | 26 | Fibroblast |
| Bub3        | 0.43 | 0.00 | 0.00 | 0.32 | 0.14 | 26 | Fibroblast |
| Suz12       | 0.45 | 0.00 | 0.00 | 0.31 | 0.13 | 26 | Fibroblast |
| Fh1         | 0.32 | 0.00 | 0.00 | 0.29 | 0.12 | 26 | Fibroblast |
| Smc6        | 0.36 | 0.00 | 0.00 | 0.59 | 0.33 | 26 | Fibroblast |
| Gm6169      | 0.43 | 0.00 | 0.00 | 0.30 | 0.13 | 26 | Fibroblast |
| Cbx3        | 0.39 | 0.00 | 0.00 | 0.61 | 0.34 | 26 | Fibroblast |
| Eif2s1      | 0.35 | 0.00 | 0.00 | 0.31 | 0.13 | 26 | Fibroblast |
| Taf15       | 0.34 | 0.00 | 0.00 | 0.26 | 0.10 | 26 | Fibroblast |
| Pdia4       | 0.48 | 0.00 | 0.00 | 0.42 | 0.21 | 26 | Fibroblast |
| Itsn2       | 0.39 | 0.00 | 0.00 | 0.48 | 0.25 | 26 | Fibroblast |
| Prpf38b     | 0.39 | 0.00 | 0.00 | 0.77 | 0.50 | 26 | Fibroblast |
| Larp7       | 0.31 | 0.00 | 0.00 | 0.38 | 0.17 | 26 | Fibroblast |
| Magoh       | 0.36 | 0.00 | 0.00 | 0.36 | 0.16 | 26 | Fibroblast |
| Hnrnpab     | 0.42 | 0.00 | 0.00 | 0.57 | 0.33 | 26 | Fibroblast |
| Llph        | 0.41 | 0.00 | 0.00 | 0.59 | 0.34 | 26 | Fibroblast |
| Srsf7       | 0.34 | 0.00 | 0.00 | 0.35 | 0.16 | 26 | Fibroblast |
| Nhp2l1      | 0.36 | 0.00 | 0.00 | 0.39 | 0.19 | 26 | Fibroblast |
| Rps19bp1    | 0.35 | 0.00 | 0.00 | 0.28 | 0.12 | 26 | Fibroblast |
| Hint1       | 0.42 | 0.00 | 0.00 | 0.71 | 0.46 | 26 | Fibroblast |
| Polr1d      | 0.36 | 0.00 | 0.00 | 0.52 | 0.28 | 26 | Fibroblast |
| Rab8a       | 0.35 | 0.00 | 0.00 | 0.31 | 0.14 | 26 | Fibroblast |
| Rpl12       | 0.34 | 0.00 | 0.00 | 0.77 | 0.55 | 26 | Fibroblast |
| Srsf4       | 0.38 | 0.00 | 0.00 | 0.30 | 0.13 | 26 | Fibroblast |
| Gbp7        | 0.36 | 0.00 | 0.00 | 0.32 | 0.14 | 26 | Fibroblast |
| Rpl35       | 0.29 | 0.00 | 0.00 | 0.94 | 0.80 | 26 | Fibroblast |
| Sf3a3       | 0.35 | 0.00 | 0.00 | 0.28 | 0.12 | 26 | Fibroblast |
| mt-Nd1      | 0.27 | 0.00 | 0.00 | 0.98 | 0.91 | 26 | Fibroblast |
| Nono        | 0.35 | 0.00 | 0.00 | 0.42 | 0.21 | 26 | Fibroblast |
| Taf9        | 0.34 | 0.00 | 0.00 | 0.38 | 0.18 | 26 | Fibroblast |
| mt-Nd5      | 0.38 | 0.00 | 0.00 | 0.92 | 0.76 | 26 | Fibroblast |
| Arhgef1     | 0.34 | 0.00 | 0.00 | 0.28 | 0.12 | 26 | Fibroblast |
| Gimap6      | 0.29 | 0.00 | 0.00 | 0.36 | 0.16 | 26 | Fibroblast |
| Tmem123     | 0.32 | 0.00 | 0.00 | 0.29 | 0.12 | 26 | Fibroblast |
| Pdlim1      | 0.45 | 0.00 | 0.00 | 0.31 | 0.14 | 26 | Fibroblast |
| Eno1        | 0.40 | 0.00 | 0.00 | 0.34 | 0.16 | 26 | Fibroblast |
| Gm10222     | 0.40 | 0.00 | 0.00 | 0.67 | 0.43 | 26 | Fibroblast |
| Hsp90ab1    | 0.31 | 0.00 | 0.00 | 0.98 | 0.89 | 26 | Fibroblast |
| AC121131.2  | 0.37 | 0.00 | 0.00 | 0.64 | 0.40 | 26 | Fibroblast |
| Ucp2        | 0.33 | 0.00 | 0.00 | 0.29 | 0.12 | 26 | Fibroblast |
| Tomm70a     | 0.30 | 0.00 | 0.00 | 0.30 | 0.13 | 26 | Fibroblast |
| D19Ertd737e | 0.35 | 0.00 | 0.00 | 0.34 | 0.16 | 26 | Fibroblast |

|               |      |      |      |      |      |    |            |
|---------------|------|------|------|------|------|----|------------|
| 1810009A15Rik | 0.30 | 0.00 | 0.00 | 0.31 | 0.14 | 26 | Fibroblast |
| mt-Nd4l       | 0.38 | 0.00 | 0.00 | 0.62 | 0.38 | 26 | Fibroblast |
| mt-Atp6       | 0.29 | 0.00 | 0.00 | 0.93 | 0.85 | 26 | Fibroblast |
| Cib1          | 0.35 | 0.00 | 0.00 | 0.28 | 0.12 | 26 | Fibroblast |
| Rpl13         | 0.29 | 0.00 | 0.00 | 0.92 | 0.79 | 26 | Fibroblast |
| Eef1d         | 0.40 | 0.00 | 0.00 | 0.47 | 0.26 | 26 | Fibroblast |
| Rps19         | 0.25 | 0.00 | 0.00 | 0.94 | 0.83 | 26 | Fibroblast |
| Ywhah         | 0.37 | 0.00 | 0.00 | 0.48 | 0.26 | 26 | Fibroblast |
| Hnrnpm        | 0.35 | 0.00 | 0.00 | 0.72 | 0.49 | 26 | Fibroblast |
| Gm8225        | 0.36 | 0.00 | 0.00 | 0.32 | 0.15 | 26 | Fibroblast |
| Ppp4c         | 0.37 | 0.00 | 0.00 | 0.33 | 0.16 | 26 | Fibroblast |
| Psmb1         | 0.36 | 0.00 | 0.00 | 0.71 | 0.47 | 26 | Fibroblast |
| Adss          | 0.29 | 0.00 | 0.00 | 0.35 | 0.17 | 26 | Fibroblast |
| Sae1          | 0.30 | 0.00 | 0.00 | 0.26 | 0.11 | 26 | Fibroblast |
| Phip          | 0.34 | 0.00 | 0.00 | 0.34 | 0.16 | 26 | Fibroblast |
| Gm5160        | 0.39 | 0.00 | 0.00 | 0.41 | 0.22 | 26 | Fibroblast |
| Stip1         | 0.38 | 0.00 | 0.00 | 0.29 | 0.13 | 26 | Fibroblast |
| Gm5428        | 0.25 | 0.00 | 0.00 | 0.94 | 0.79 | 26 | Fibroblast |
| H3f3a         | 0.39 | 0.00 | 0.00 | 0.80 | 0.60 | 26 | Fibroblast |
| Sf1           | 0.31 | 0.00 | 0.00 | 0.28 | 0.12 | 26 | Fibroblast |
| Syncrip       | 0.40 | 0.00 | 0.00 | 0.45 | 0.25 | 26 | Fibroblast |
| Rfc1          | 0.33 | 0.00 | 0.00 | 0.40 | 0.21 | 26 | Fibroblast |
| Rpl39         | 0.26 | 0.00 | 0.00 | 0.94 | 0.80 | 26 | Fibroblast |
| Prelid1       | 0.31 | 0.00 | 0.00 | 0.52 | 0.29 | 26 | Fibroblast |
| Cdc42se2      | 0.36 | 0.00 | 0.00 | 0.30 | 0.14 | 26 | Fibroblast |
| Nfyb          | 0.25 | 0.00 | 0.00 | 0.27 | 0.12 | 26 | Fibroblast |
| Cacybp        | 0.35 | 0.00 | 0.00 | 0.40 | 0.21 | 26 | Fibroblast |
| Gm6472        | 0.25 | 0.00 | 0.00 | 0.93 | 0.80 | 26 | Fibroblast |
| Rps25         | 0.28 | 0.00 | 0.00 | 0.93 | 0.80 | 26 | Fibroblast |
| Mrpl54        | 0.30 | 0.00 | 0.00 | 0.31 | 0.14 | 26 | Fibroblast |
| Hspe1         | 0.27 | 0.00 | 0.00 | 0.51 | 0.29 | 26 | Fibroblast |
| Gapdh         | 0.35 | 0.00 | 0.00 | 0.30 | 0.14 | 26 | Fibroblast |
| Zcchc11       | 0.34 | 0.00 | 0.00 | 0.40 | 0.21 | 26 | Fibroblast |
| Psma1         | 0.32 | 0.00 | 0.00 | 0.47 | 0.26 | 26 | Fibroblast |
| Srrt          | 0.32 | 0.00 | 0.00 | 0.39 | 0.20 | 26 | Fibroblast |
| Plp2          | 0.38 | 0.00 | 0.00 | 0.29 | 0.13 | 26 | Fibroblast |
| 11-Sep        | 0.30 | 0.00 | 0.00 | 0.43 | 0.23 | 26 | Fibroblast |
| Trmt112       | 0.25 | 0.00 | 0.00 | 0.31 | 0.14 | 26 | Fibroblast |
| Caprin1       | 0.39 | 0.00 | 0.00 | 0.44 | 0.25 | 26 | Fibroblast |
| Cct3          | 0.31 | 0.00 | 0.00 | 0.34 | 0.17 | 26 | Fibroblast |
| Thrap3        | 0.37 | 0.00 | 0.00 | 0.59 | 0.37 | 26 | Fibroblast |
| Mrpl15        | 0.28 | 0.00 | 0.00 | 0.30 | 0.14 | 26 | Fibroblast |
| Sf3b5         | 0.35 | 0.00 | 0.00 | 0.41 | 0.22 | 26 | Fibroblast |

|            |      |      |      |      |      |    |            |
|------------|------|------|------|------|------|----|------------|
| Rpl28      | 0.29 | 0.00 | 0.00 | 0.76 | 0.53 | 26 | Fibroblast |
| Tsix       | 0.27 | 0.00 | 0.00 | 0.36 | 0.18 | 26 | Fibroblast |
| Gm9825     | 0.28 | 0.00 | 0.00 | 0.28 | 0.13 | 26 | Fibroblast |
| Mtpn       | 0.31 | 0.00 | 0.00 | 0.48 | 0.27 | 26 | Fibroblast |
| Nop10      | 0.32 | 0.00 | 0.00 | 0.48 | 0.28 | 26 | Fibroblast |
| Tmed5      | 0.35 | 0.00 | 0.00 | 0.34 | 0.17 | 26 | Fibroblast |
| Mrpl21     | 0.28 | 0.00 | 0.00 | 0.31 | 0.15 | 26 | Fibroblast |
| Nek7       | 0.36 | 0.00 | 0.00 | 0.26 | 0.12 | 26 | Fibroblast |
| Srsf6      | 0.25 | 0.00 | 0.00 | 0.37 | 0.19 | 26 | Fibroblast |
| Rpl13a-ps1 | 0.34 | 0.00 | 0.00 | 0.75 | 0.55 | 26 | Fibroblast |
| Cct8       | 0.31 | 0.00 | 0.00 | 0.39 | 0.21 | 26 | Fibroblast |
| Rps10      | 0.28 | 0.00 | 0.00 | 0.87 | 0.70 | 26 | Fibroblast |
| Calm3      | 0.29 | 0.00 | 0.00 | 0.37 | 0.20 | 26 | Fibroblast |
| Tpr        | 0.32 | 0.00 | 0.00 | 0.71 | 0.50 | 26 | Fibroblast |
| Tcp1       | 0.31 | 0.00 | 0.00 | 0.43 | 0.24 | 26 | Fibroblast |
| AC167036.1 | 0.33 | 0.00 | 0.00 | 0.51 | 0.30 | 26 | Fibroblast |
| Tra2b      | 0.29 | 0.00 | 0.00 | 0.52 | 0.29 | 26 | Fibroblast |
| Ptpn1      | 0.29 | 0.00 | 0.00 | 0.39 | 0.20 | 26 | Fibroblast |
| Ppm1g      | 0.30 | 0.00 | 0.00 | 0.29 | 0.13 | 26 | Fibroblast |
| Lrrfip1    | 0.26 | 0.00 | 0.00 | 0.46 | 0.26 | 26 | Fibroblast |
| Twistnb    | 0.29 | 0.00 | 0.00 | 0.29 | 0.13 | 26 | Fibroblast |
| Gm18025    | 0.32 | 0.00 | 0.00 | 0.38 | 0.20 | 26 | Fibroblast |
| Ccdc41     | 0.28 | 0.00 | 0.00 | 0.34 | 0.17 | 26 | Fibroblast |
| Smarcc1    | 0.33 | 0.00 | 0.00 | 0.33 | 0.17 | 26 | Fibroblast |
| Baz1b      | 0.31 | 0.00 | 0.00 | 0.47 | 0.27 | 26 | Fibroblast |
| AC123611.1 | 0.33 | 0.00 | 0.00 | 0.61 | 0.39 | 26 | Fibroblast |
| Rpl36al    | 0.34 | 0.00 | 0.00 | 0.71 | 0.52 | 26 | Fibroblast |
| Cbx1       | 0.32 | 0.00 | 0.00 | 0.64 | 0.42 | 26 | Fibroblast |
| U2surp     | 0.29 | 0.00 | 0.00 | 0.54 | 0.33 | 26 | Fibroblast |
| Arl6ip4    | 0.32 | 0.00 | 0.00 | 0.36 | 0.19 | 26 | Fibroblast |
| Cox5a      | 0.26 | 0.00 | 0.00 | 0.53 | 0.31 | 26 | Fibroblast |
| Kmt2a      | 0.30 | 0.00 | 0.00 | 0.39 | 0.21 | 26 | Fibroblast |
| Mapk1      | 0.26 | 0.00 | 0.00 | 0.34 | 0.17 | 26 | Fibroblast |
| Sf3b2      | 0.27 | 0.00 | 0.00 | 0.62 | 0.40 | 26 | Fibroblast |
| Tpi1       | 0.26 | 0.00 | 0.00 | 0.31 | 0.15 | 26 | Fibroblast |
| Snrpd3     | 0.33 | 0.00 | 0.00 | 0.52 | 0.32 | 26 | Fibroblast |
| Tcerg1     | 0.28 | 0.00 | 0.00 | 0.37 | 0.20 | 26 | Fibroblast |
| Rnps1      | 0.32 | 0.00 | 0.00 | 0.30 | 0.15 | 26 | Fibroblast |
| Ppp1ca     | 0.29 | 0.00 | 0.00 | 0.54 | 0.33 | 26 | Fibroblast |
| Snhg5      | 0.29 | 0.00 | 0.00 | 0.34 | 0.18 | 26 | Fibroblast |
| H3f3b      | 0.26 | 0.00 | 0.00 | 0.96 | 0.89 | 26 | Fibroblast |
| Ube2a      | 0.42 | 0.00 | 0.00 | 0.34 | 0.18 | 26 | Fibroblast |
| Atp5a1     | 0.30 | 0.00 | 0.00 | 0.61 | 0.41 | 26 | Fibroblast |

|               |      |      |      |      |      |    |                  |
|---------------|------|------|------|------|------|----|------------------|
| Mat2a         | 0.27 | 0.00 | 0.00 | 0.46 | 0.27 | 26 | Fibroblast       |
| Rps17         | 0.25 | 0.00 | 0.00 | 0.90 | 0.77 | 26 | Fibroblast       |
| Gm11273       | 0.26 | 0.00 | 0.00 | 0.60 | 0.38 | 26 | Fibroblast       |
| Gm6563        | 0.31 | 0.00 | 0.00 | 0.53 | 0.34 | 26 | Fibroblast       |
| 2310036O22Rik | 0.29 | 0.00 | 0.00 | 0.36 | 0.19 | 26 | Fibroblast       |
| Pqbp1         | 0.25 | 0.00 | 0.00 | 0.26 | 0.12 | 26 | Fibroblast       |
| Sumo2         | 0.30 | 0.00 | 0.00 | 0.49 | 0.30 | 26 | Fibroblast       |
| Slc25a3       | 0.27 | 0.00 | 0.00 | 0.64 | 0.42 | 26 | Fibroblast       |
| S100a6        | 0.47 | 0.00 | 0.00 | 0.49 | 0.31 | 26 | Fibroblast       |
| Tardbp        | 0.28 | 0.00 | 0.00 | 0.51 | 0.31 | 26 | Fibroblast       |
| Stx7          | 0.33 | 0.00 | 0.00 | 0.29 | 0.15 | 26 | Fibroblast       |
| Ndufb7        | 0.27 | 0.00 | 0.00 | 0.47 | 0.28 | 26 | Fibroblast       |
| Stag2         | 0.32 | 0.00 | 0.00 | 0.40 | 0.23 | 26 | Fibroblast       |
| Eif4a3        | 0.33 | 0.00 | 0.00 | 0.35 | 0.19 | 26 | Fibroblast       |
| Cct7          | 0.30 | 0.00 | 0.00 | 0.38 | 0.21 | 26 | Fibroblast       |
| Psme1         | 0.25 | 0.00 | 0.00 | 0.52 | 0.32 | 26 | Fibroblast       |
| Mcl1          | 0.25 | 0.00 | 0.00 | 0.40 | 0.23 | 26 | Fibroblast       |
| Hnrnpa3       | 0.32 | 0.00 | 0.00 | 0.64 | 0.46 | 26 | Fibroblast       |
| Sarnp         | 0.25 | 0.00 | 0.00 | 0.43 | 0.25 | 26 | Fibroblast       |
| Erh           | 0.31 | 0.00 | 0.00 | 0.46 | 0.29 | 26 | Fibroblast       |
| Mrpl52        | 0.25 | 0.00 | 0.00 | 0.52 | 0.33 | 26 | Fibroblast       |
| Pdpf          | 0.25 | 0.00 | 0.00 | 0.33 | 0.18 | 26 | Fibroblast       |
| Cox20         | 0.27 | 0.00 | 0.00 | 0.33 | 0.18 | 26 | Fibroblast       |
| Mtdh          | 0.28 | 0.00 | 0.00 | 0.67 | 0.48 | 26 | Fibroblast       |
| Snrpd2        | 0.29 | 0.00 | 0.00 | 0.41 | 0.25 | 26 | Fibroblast       |
| Dnajb11       | 0.26 | 0.00 | 0.00 | 0.29 | 0.16 | 26 | Fibroblast       |
| Oaz1          | 0.26 | 0.00 | 0.00 | 0.80 | 0.62 | 26 | Fibroblast       |
| Ldha          | 0.25 | 0.00 | 0.00 | 0.47 | 0.29 | 26 | Fibroblast       |
| Atp5b         | 0.27 | 0.00 | 0.00 | 0.63 | 0.44 | 26 | Fibroblast       |
| Kpnb1         | 0.28 | 0.00 | 0.00 | 0.33 | 0.19 | 26 | Fibroblast       |
| Gm12728       | 0.29 | 0.00 | 0.00 | 0.31 | 0.17 | 26 | Fibroblast       |
| Rps2-ps6      | 0.26 | 0.00 | 0.00 | 0.58 | 0.41 | 26 | Fibroblast       |
| Eif2s2        | 0.27 | 0.00 | 0.01 | 0.64 | 0.48 | 26 | Fibroblast       |
| Gm6139        | 0.27 | 0.00 | 0.02 | 0.59 | 0.42 | 26 | Fibroblast       |
| Manf          | 0.31 | 0.00 | 0.02 | 0.33 | 0.20 | 26 | Fibroblast       |
| Wbp11         | 0.28 | 0.00 | 0.02 | 0.39 | 0.24 | 26 | Fibroblast       |
| Casp8ap2      | 0.29 | 0.00 | 0.03 | 0.30 | 0.17 | 26 | Fibroblast       |
| Cct6a         | 0.26 | 0.00 | 0.03 | 0.38 | 0.24 | 26 | Fibroblast       |
| Tagln2        | 0.33 | 0.00 | 0.03 | 0.62 | 0.45 | 26 | Fibroblast       |
| Scgb3a2       | 4.97 | 0.00 | 0.00 | 0.96 | 0.07 | 27 | Mixed Epithelial |
| Cyp2f2        | 3.52 | 0.00 | 0.00 | 0.95 | 0.02 | 27 | Mixed Epithelial |
| Cbr2          | 3.16 | 0.00 | 0.00 | 0.99 | 0.16 | 27 | Mixed Epithelial |
| Hp            | 3.02 | 0.00 | 0.00 | 0.89 | 0.11 | 27 | Mixed Epithelial |

|               |      |      |      |      |      |    |                  |
|---------------|------|------|------|------|------|----|------------------|
| Aldh1a1       | 2.56 | 0.00 | 0.00 | 0.88 | 0.04 | 27 | Mixed Epithelial |
| Aldh1a7       | 2.06 | 0.00 | 0.00 | 0.80 | 0.04 | 27 | Mixed Epithelial |
| Gsto1         | 2.01 | 0.00 | 0.00 | 0.66 | 0.06 | 27 | Mixed Epithelial |
| Gsta4         | 1.97 | 0.00 | 0.00 | 0.83 | 0.04 | 27 | Mixed Epithelial |
| Sec14l3       | 1.86 | 0.00 | 0.00 | 0.91 | 0.11 | 27 | Mixed Epithelial |
| B430010I23Rik | 1.83 | 0.00 | 0.00 | 0.50 | 0.02 | 27 | Mixed Epithelial |
| Lypd2         | 1.78 | 0.00 | 0.00 | 0.51 | 0.01 | 27 | Mixed Epithelial |
| Cldn10        | 1.76 | 0.00 | 0.00 | 0.71 | 0.02 | 27 | Mixed Epithelial |
| Krt15         | 1.39 | 0.00 | 0.00 | 0.27 | 0.00 | 27 | Mixed Epithelial |
| Gsta3         | 1.37 | 0.00 | 0.00 | 0.60 | 0.01 | 27 | Mixed Epithelial |
| Aox3          | 1.09 | 0.00 | 0.00 | 0.41 | 0.01 | 27 | Mixed Epithelial |
| 5330417C22Rik | 0.89 | 0.00 | 0.00 | 0.44 | 0.02 | 27 | Mixed Epithelial |
| Slc16a11      | 0.82 | 0.00 | 0.00 | 0.34 | 0.00 | 27 | Mixed Epithelial |
| Ace2          | 0.81 | 0.00 | 0.00 | 0.36 | 0.01 | 27 | Mixed Epithelial |
| Cckar         | 0.80 | 0.00 | 0.00 | 0.36 | 0.01 | 27 | Mixed Epithelial |
| Gabrp         | 0.73 | 0.00 | 0.00 | 0.32 | 0.00 | 27 | Mixed Epithelial |
| Gm15883       | 0.69 | 0.00 | 0.00 | 0.32 | 0.00 | 27 | Mixed Epithelial |
| Gpx2          | 0.67 | 0.00 | 0.00 | 0.29 | 0.01 | 27 | Mixed Epithelial |
| Sox2          | 0.62 | 0.00 | 0.00 | 0.27 | 0.01 | 27 | Mixed Epithelial |
| Lrrc26        | 0.62 | 0.00 | 0.00 | 0.27 | 0.00 | 27 | Mixed Epithelial |
| AU021092      | 1.15 | 0.00 | 0.00 | 0.56 | 0.04 | 27 | Mixed Epithelial |
| Homer2        | 0.65 | 0.00 | 0.00 | 0.29 | 0.01 | 27 | Mixed Epithelial |
| Krt19         | 1.24 | 0.00 | 0.00 | 0.66 | 0.06 | 27 | Mixed Epithelial |
| Wfdc2         | 2.46 | 0.00 | 0.00 | 0.95 | 0.16 | 27 | Mixed Epithelial |
| Ehf           | 0.84 | 0.00 | 0.00 | 0.34 | 0.02 | 27 | Mixed Epithelial |
| Tspan1        | 1.01 | 0.00 | 0.00 | 0.51 | 0.04 | 27 | Mixed Epithelial |
| Mgst1         | 2.43 | 0.00 | 0.00 | 0.93 | 0.19 | 27 | Mixed Epithelial |
| Cgn           | 0.87 | 0.00 | 0.00 | 0.48 | 0.04 | 27 | Mixed Epithelial |
| Ces1d         | 1.84 | 0.00 | 0.00 | 0.90 | 0.17 | 27 | Mixed Epithelial |
| Chia          | 1.83 | 0.00 | 0.00 | 0.35 | 0.02 | 27 | Mixed Epithelial |
| Ldhb          | 1.22 | 0.00 | 0.00 | 0.61 | 0.08 | 27 | Mixed Epithelial |
| Scgb1a1       | 5.32 | 0.00 | 0.00 | 0.99 | 0.35 | 27 | Mixed Epithelial |
| Acsl1         | 0.77 | 0.00 | 0.00 | 0.36 | 0.03 | 27 | Mixed Epithelial |
| Sftpd         | 1.34 | 0.00 | 0.00 | 0.90 | 0.16 | 27 | Mixed Epithelial |
| Kcnk2         | 0.61 | 0.00 | 0.00 | 0.25 | 0.01 | 27 | Mixed Epithelial |
| Por           | 1.44 | 0.00 | 0.00 | 0.74 | 0.12 | 27 | Mixed Epithelial |
| Atp1b1        | 1.50 | 0.00 | 0.00 | 0.90 | 0.18 | 27 | Mixed Epithelial |
| Cldn7         | 1.04 | 0.00 | 0.00 | 0.60 | 0.08 | 27 | Mixed Epithelial |
| Dcxr          | 1.17 | 0.00 | 0.00 | 0.69 | 0.11 | 27 | Mixed Epithelial |
| Gstt3         | 0.68 | 0.00 | 0.00 | 0.32 | 0.03 | 27 | Mixed Epithelial |
| Muc1          | 0.97 | 0.00 | 0.00 | 0.63 | 0.09 | 27 | Mixed Epithelial |
| Fam46c        | 0.63 | 0.00 | 0.00 | 0.30 | 0.02 | 27 | Mixed Epithelial |
| Selenbp2      | 1.64 | 0.00 | 0.00 | 0.81 | 0.17 | 27 | Mixed Epithelial |

|               |      |      |      |      |      |    |                  |
|---------------|------|------|------|------|------|----|------------------|
| Selenbp1      | 1.78 | 0.00 | 0.00 | 0.90 | 0.22 | 27 | Mixed Epithelial |
| Krt18         | 0.99 | 0.00 | 0.00 | 0.57 | 0.08 | 27 | Mixed Epithelial |
| Gm16136       | 0.57 | 0.00 | 0.00 | 0.26 | 0.02 | 27 | Mixed Epithelial |
| Retnla        | 3.43 | 0.00 | 0.00 | 0.61 | 0.10 | 27 | Mixed Epithelial |
| Sfta2         | 1.17 | 0.00 | 0.00 | 0.80 | 0.15 | 27 | Mixed Epithelial |
| Dapk2         | 0.55 | 0.00 | 0.00 | 0.27 | 0.02 | 27 | Mixed Epithelial |
| Alas1         | 1.24 | 0.00 | 0.00 | 0.66 | 0.12 | 27 | Mixed Epithelial |
| Kcnj15        | 0.73 | 0.00 | 0.00 | 0.38 | 0.04 | 27 | Mixed Epithelial |
| Cisd1         | 1.06 | 0.00 | 0.00 | 0.64 | 0.11 | 27 | Mixed Epithelial |
| Epcam         | 0.97 | 0.00 | 0.00 | 0.60 | 0.10 | 27 | Mixed Epithelial |
| Krt8          | 0.98 | 0.00 | 0.00 | 0.53 | 0.08 | 27 | Mixed Epithelial |
| Gstk1         | 0.91 | 0.00 | 0.00 | 0.51 | 0.08 | 27 | Mixed Epithelial |
| Cldn3         | 0.89 | 0.00 | 0.00 | 0.67 | 0.12 | 27 | Mixed Epithelial |
| Mettl7a1      | 1.35 | 0.00 | 0.00 | 0.83 | 0.22 | 27 | Mixed Epithelial |
| Mettl7a2      | 1.02 | 0.00 | 0.00 | 0.61 | 0.11 | 27 | Mixed Epithelial |
| Rasl11a       | 0.92 | 0.00 | 0.00 | 0.45 | 0.06 | 27 | Mixed Epithelial |
| Tacstd2       | 0.70 | 0.00 | 0.00 | 0.31 | 0.03 | 27 | Mixed Epithelial |
| Ptgr1         | 0.92 | 0.00 | 0.00 | 0.41 | 0.05 | 27 | Mixed Epithelial |
| Spint2        | 0.88 | 0.00 | 0.00 | 0.62 | 0.11 | 27 | Mixed Epithelial |
| Nupr1         | 1.26 | 0.00 | 0.00 | 0.76 | 0.18 | 27 | Mixed Epithelial |
| Prdx6         | 1.56 | 0.00 | 0.00 | 0.87 | 0.27 | 27 | Mixed Epithelial |
| Cd55          | 0.80 | 0.00 | 0.00 | 0.48 | 0.07 | 27 | Mixed Epithelial |
| Clic3         | 0.87 | 0.00 | 0.00 | 0.54 | 0.09 | 27 | Mixed Epithelial |
| Scnn1b        | 0.49 | 0.00 | 0.00 | 0.27 | 0.03 | 27 | Mixed Epithelial |
| Pir           | 0.61 | 0.00 | 0.00 | 0.31 | 0.03 | 27 | Mixed Epithelial |
| Ptpn13        | 0.57 | 0.00 | 0.00 | 0.31 | 0.03 | 27 | Mixed Epithelial |
| Kcnk1         | 0.55 | 0.00 | 0.00 | 0.26 | 0.03 | 27 | Mixed Epithelial |
| Rab25         | 0.49 | 0.00 | 0.00 | 0.25 | 0.02 | 27 | Mixed Epithelial |
| Trf           | 0.99 | 0.00 | 0.00 | 0.54 | 0.10 | 27 | Mixed Epithelial |
| Fam174b       | 0.59 | 0.00 | 0.00 | 0.38 | 0.05 | 27 | Mixed Epithelial |
| 8430408G22Rik | 0.67 | 0.00 | 0.00 | 0.33 | 0.04 | 27 | Mixed Epithelial |
| Cdh1          | 0.74 | 0.00 | 0.00 | 0.45 | 0.08 | 27 | Mixed Epithelial |
| Pdzk1ip1      | 0.48 | 0.00 | 0.00 | 0.26 | 0.03 | 27 | Mixed Epithelial |
| Mal2          | 0.63 | 0.00 | 0.00 | 0.39 | 0.06 | 27 | Mixed Epithelial |
| Chchd10       | 0.65 | 0.00 | 0.00 | 0.60 | 0.13 | 27 | Mixed Epithelial |
| Chi3l1        | 1.05 | 0.00 | 0.00 | 0.52 | 0.11 | 27 | Mixed Epithelial |
| Prr15l        | 0.60 | 0.00 | 0.00 | 0.37 | 0.06 | 27 | Mixed Epithelial |
| Klf5          | 0.53 | 0.00 | 0.00 | 0.26 | 0.03 | 27 | Mixed Epithelial |
| Acss1         | 0.52 | 0.00 | 0.00 | 0.28 | 0.04 | 27 | Mixed Epithelial |
| Il18r1        | 0.61 | 0.00 | 0.00 | 0.40 | 0.07 | 27 | Mixed Epithelial |
| 1810010H24Rik | 0.50 | 0.00 | 0.00 | 0.26 | 0.03 | 27 | Mixed Epithelial |
| Cxadr         | 0.54 | 0.00 | 0.00 | 0.36 | 0.06 | 27 | Mixed Epithelial |
| Mal           | 0.61 | 0.00 | 0.00 | 0.31 | 0.05 | 27 | Mixed Epithelial |

|               |      |      |      |      |      |    |                  |
|---------------|------|------|------|------|------|----|------------------|
| Myo5c         | 0.68 | 0.00 | 0.00 | 0.40 | 0.08 | 27 | Mixed Epithelial |
| Tmc4          | 0.50 | 0.00 | 0.00 | 0.28 | 0.04 | 27 | Mixed Epithelial |
| Alcam         | 0.74 | 0.00 | 0.00 | 0.77 | 0.23 | 27 | Mixed Epithelial |
| Atp6v1c2      | 0.46 | 0.00 | 0.00 | 0.32 | 0.05 | 27 | Mixed Epithelial |
| Wwc1          | 0.54 | 0.00 | 0.00 | 0.36 | 0.06 | 27 | Mixed Epithelial |
| Gstm2         | 0.51 | 0.00 | 0.00 | 0.36 | 0.06 | 27 | Mixed Epithelial |
| Ascc2         | 0.45 | 0.00 | 0.00 | 0.28 | 0.04 | 27 | Mixed Epithelial |
| Col23a1       | 0.64 | 0.00 | 0.00 | 0.30 | 0.05 | 27 | Mixed Epithelial |
| 2200002D01Rik | 0.60 | 0.00 | 0.00 | 0.39 | 0.07 | 27 | Mixed Epithelial |
| Cyb5          | 0.97 | 0.00 | 0.00 | 0.73 | 0.26 | 27 | Mixed Epithelial |
| Carkd         | 0.82 | 0.00 | 0.00 | 0.57 | 0.16 | 27 | Mixed Epithelial |
| Emb           | 0.57 | 0.00 | 0.00 | 0.49 | 0.11 | 27 | Mixed Epithelial |
| Atp11a        | 0.81 | 0.00 | 0.00 | 0.48 | 0.11 | 27 | Mixed Epithelial |
| C3            | 0.37 | 0.00 | 0.00 | 0.28 | 0.04 | 27 | Mixed Epithelial |
| Cd24a         | 0.51 | 0.00 | 0.00 | 0.53 | 0.13 | 27 | Mixed Epithelial |
| Krt7          | 0.54 | 0.00 | 0.00 | 0.39 | 0.08 | 27 | Mixed Epithelial |
| Gclc          | 0.59 | 0.00 | 0.00 | 0.40 | 0.09 | 27 | Mixed Epithelial |
| Pon3          | 0.55 | 0.00 | 0.00 | 0.44 | 0.10 | 27 | Mixed Epithelial |
| Cd9           | 0.83 | 0.00 | 0.00 | 0.84 | 0.35 | 27 | Mixed Epithelial |
| Smim6         | 0.47 | 0.00 | 0.00 | 0.26 | 0.04 | 27 | Mixed Epithelial |
| Gstm1         | 0.70 | 0.00 | 0.00 | 0.56 | 0.15 | 27 | Mixed Epithelial |
| Smim22        | 0.44 | 0.00 | 0.00 | 0.26 | 0.04 | 27 | Mixed Epithelial |
| Bsg           | 0.83 | 0.00 | 0.00 | 0.84 | 0.36 | 27 | Mixed Epithelial |
| Ssx2ip        | 0.56 | 0.00 | 0.00 | 0.26 | 0.04 | 27 | Mixed Epithelial |
| Pgap2         | 0.51 | 0.00 | 0.00 | 0.43 | 0.10 | 27 | Mixed Epithelial |
| Wfdc1         | 0.49 | 0.00 | 0.00 | 0.32 | 0.06 | 27 | Mixed Epithelial |
| Scnn1a        | 0.56 | 0.00 | 0.00 | 0.35 | 0.07 | 27 | Mixed Epithelial |
| Cp            | 0.91 | 0.00 | 0.00 | 0.47 | 0.12 | 27 | Mixed Epithelial |
| Fmo2          | 0.52 | 0.00 | 0.00 | 0.57 | 0.17 | 27 | Mixed Epithelial |
| Npc2          | 0.54 | 0.00 | 0.00 | 0.93 | 0.54 | 27 | Mixed Epithelial |
| Sdc4          | 0.59 | 0.00 | 0.00 | 0.69 | 0.23 | 27 | Mixed Epithelial |
| Gprc5a        | 0.41 | 0.00 | 0.00 | 0.34 | 0.07 | 27 | Mixed Epithelial |
| Fdx1          | 0.65 | 0.00 | 0.00 | 0.49 | 0.14 | 27 | Mixed Epithelial |
| Sdc1          | 0.58 | 0.00 | 0.00 | 0.45 | 0.12 | 27 | Mixed Epithelial |
| Car8          | 0.39 | 0.00 | 0.00 | 0.36 | 0.08 | 27 | Mixed Epithelial |
| Chka          | 0.61 | 0.00 | 0.00 | 0.41 | 0.10 | 27 | Mixed Epithelial |
| Prdx6b        | 0.52 | 0.00 | 0.00 | 0.29 | 0.06 | 27 | Mixed Epithelial |
| Slc12a2       | 0.59 | 0.00 | 0.00 | 0.50 | 0.15 | 27 | Mixed Epithelial |
| Tmem176a      | 0.63 | 0.00 | 0.00 | 0.60 | 0.20 | 27 | Mixed Epithelial |
| Tcea3         | 0.40 | 0.00 | 0.00 | 0.34 | 0.08 | 27 | Mixed Epithelial |
| Acsl4         | 0.54 | 0.00 | 0.00 | 0.43 | 0.12 | 27 | Mixed Epithelial |
| Ide           | 0.47 | 0.00 | 0.00 | 0.36 | 0.09 | 27 | Mixed Epithelial |
| Cystm1        | 0.45 | 0.00 | 0.00 | 0.34 | 0.08 | 27 | Mixed Epithelial |

|         |      |      |      |      |      |    |                  |
|---------|------|------|------|------|------|----|------------------|
| Pgrmc1  | 0.64 | 0.00 | 0.00 | 0.54 | 0.19 | 27 | Mixed Epithelial |
| Atp8a1  | 0.63 | 0.00 | 0.00 | 0.50 | 0.15 | 27 | Mixed Epithelial |
| Anxa1   | 0.87 | 0.00 | 0.00 | 0.56 | 0.19 | 27 | Mixed Epithelial |
| Gdpd1   | 0.44 | 0.00 | 0.00 | 0.29 | 0.06 | 27 | Mixed Epithelial |
| Me1     | 0.48 | 0.00 | 0.00 | 0.27 | 0.06 | 27 | Mixed Epithelial |
| Fgf1    | 0.43 | 0.00 | 0.00 | 0.29 | 0.06 | 27 | Mixed Epithelial |
| Avpi1   | 0.37 | 0.00 | 0.00 | 0.35 | 0.09 | 27 | Mixed Epithelial |
| Tpd52   | 0.46 | 0.00 | 0.00 | 0.39 | 0.11 | 27 | Mixed Epithelial |
| Cyp4b1  | 0.32 | 0.00 | 0.00 | 0.41 | 0.11 | 27 | Mixed Epithelial |
| Larp4b  | 0.56 | 0.00 | 0.00 | 0.48 | 0.16 | 27 | Mixed Epithelial |
| Slc26a2 | 0.46 | 0.00 | 0.00 | 0.29 | 0.07 | 27 | Mixed Epithelial |
| Spink5  | 0.80 | 0.00 | 0.00 | 0.32 | 0.08 | 27 | Mixed Epithelial |
| Hes1    | 0.83 | 0.00 | 0.00 | 0.66 | 0.29 | 27 | Mixed Epithelial |
| Myh14   | 0.33 | 0.00 | 0.00 | 0.36 | 0.10 | 27 | Mixed Epithelial |
| Phyh    | 0.38 | 0.00 | 0.00 | 0.27 | 0.06 | 27 | Mixed Epithelial |
| Mecom   | 0.33 | 0.00 | 0.00 | 0.36 | 0.10 | 27 | Mixed Epithelial |
| Ccnd1   | 0.38 | 0.00 | 0.00 | 0.54 | 0.19 | 27 | Mixed Epithelial |
| Neat1   | 0.41 | 0.00 | 0.00 | 0.67 | 0.27 | 27 | Mixed Epithelial |
| S100a11 | 0.59 | 0.00 | 0.00 | 0.85 | 0.49 | 27 | Mixed Epithelial |
| Gfpt1   | 0.35 | 0.00 | 0.00 | 0.27 | 0.07 | 27 | Mixed Epithelial |
| Wbp5    | 0.59 | 0.00 | 0.00 | 0.83 | 0.48 | 27 | Mixed Epithelial |
| Runx1   | 0.34 | 0.00 | 0.00 | 0.28 | 0.07 | 27 | Mixed Epithelial |
| Ppap2b  | 0.49 | 0.00 | 0.00 | 0.59 | 0.24 | 27 | Mixed Epithelial |
| Nkx2-1  | 0.37 | 0.00 | 0.00 | 0.34 | 0.10 | 27 | Mixed Epithelial |
| Pgrmc2  | 0.34 | 0.00 | 0.00 | 0.31 | 0.08 | 27 | Mixed Epithelial |
| Ndufaf7 | 0.31 | 0.00 | 0.00 | 0.28 | 0.07 | 27 | Mixed Epithelial |
| Wwp1    | 0.36 | 0.00 | 0.00 | 0.41 | 0.14 | 27 | Mixed Epithelial |
| Idh2    | 0.44 | 0.00 | 0.00 | 0.51 | 0.19 | 27 | Mixed Epithelial |
| Uqcr10  | 0.51 | 0.00 | 0.00 | 0.73 | 0.36 | 27 | Mixed Epithelial |
| Cgnl1   | 0.50 | 0.00 | 0.00 | 0.37 | 0.12 | 27 | Mixed Epithelial |
| Tef     | 0.29 | 0.00 | 0.00 | 0.28 | 0.08 | 27 | Mixed Epithelial |
| Vamp8   | 0.55 | 0.00 | 0.00 | 0.72 | 0.34 | 27 | Mixed Epithelial |
| Ifrd1   | 0.40 | 0.00 | 0.00 | 0.44 | 0.16 | 27 | Mixed Epithelial |
| Il6st   | 0.34 | 0.00 | 0.00 | 0.31 | 0.09 | 27 | Mixed Epithelial |
| Cltb    | 0.32 | 0.00 | 0.00 | 0.35 | 0.11 | 27 | Mixed Epithelial |
| Mtus1   | 0.45 | 0.00 | 0.00 | 0.45 | 0.17 | 27 | Mixed Epithelial |
| Oat     | 0.41 | 0.00 | 0.00 | 0.37 | 0.13 | 27 | Mixed Epithelial |
| Fth1    | 0.31 | 0.00 | 0.00 | 0.96 | 0.81 | 27 | Mixed Epithelial |
| Rfk     | 0.35 | 0.00 | 0.00 | 0.32 | 0.10 | 27 | Mixed Epithelial |
| Mbip    | 0.35 | 0.00 | 0.00 | 0.34 | 0.12 | 27 | Mixed Epithelial |
| mt-Nd5  | 0.52 | 0.00 | 0.00 | 0.93 | 0.76 | 27 | Mixed Epithelial |
| Vmp1    | 0.29 | 0.00 | 0.00 | 0.40 | 0.14 | 27 | Mixed Epithelial |
| Ndufc2  | 0.42 | 0.00 | 0.00 | 0.74 | 0.39 | 27 | Mixed Epithelial |

|         |      |      |      |      |      |    |                  |
|---------|------|------|------|------|------|----|------------------|
| Ptplb   | 0.28 | 0.00 | 0.00 | 0.26 | 0.08 | 27 | Mixed Epithelial |
| Fkbp4   | 0.37 | 0.00 | 0.00 | 0.40 | 0.15 | 27 | Mixed Epithelial |
| Sat1    | 0.35 | 0.00 | 0.00 | 0.67 | 0.33 | 27 | Mixed Epithelial |
| Tmem109 | 0.32 | 0.00 | 0.00 | 0.35 | 0.13 | 27 | Mixed Epithelial |
| Tmem50b | 0.33 | 0.00 | 0.00 | 0.26 | 0.08 | 27 | Mixed Epithelial |
| Gde1    | 0.38 | 0.00 | 0.00 | 0.39 | 0.15 | 27 | Mixed Epithelial |
| Nfe2l2  | 0.41 | 0.00 | 0.00 | 0.55 | 0.25 | 27 | Mixed Epithelial |
| Prrg3   | 0.34 | 0.00 | 0.00 | 0.25 | 0.08 | 27 | Mixed Epithelial |
| Vamp5   | 0.28 | 0.00 | 0.00 | 0.29 | 0.10 | 27 | Mixed Epithelial |
| Lrrfip2 | 0.32 | 0.00 | 0.00 | 0.37 | 0.14 | 27 | Mixed Epithelial |
| mt-Co1  | 0.34 | 0.00 | 0.00 | 0.99 | 0.95 | 27 | Mixed Epithelial |
| Pls3    | 0.41 | 0.00 | 0.00 | 0.47 | 0.20 | 27 | Mixed Epithelial |
| Paics   | 0.34 | 0.00 | 0.00 | 0.52 | 0.23 | 27 | Mixed Epithelial |
| mt-Cytb | 0.35 | 0.00 | 0.00 | 0.96 | 0.82 | 27 | Mixed Epithelial |
| Emc6    | 0.28 | 0.00 | 0.00 | 0.36 | 0.14 | 27 | Mixed Epithelial |
| Prdx1   | 0.41 | 0.00 | 0.00 | 0.78 | 0.50 | 27 | Mixed Epithelial |
| Bag1    | 0.38 | 0.00 | 0.00 | 0.51 | 0.24 | 27 | Mixed Epithelial |
| Prkci   | 0.33 | 0.00 | 0.00 | 0.34 | 0.13 | 27 | Mixed Epithelial |
| Pcyt1a  | 0.28 | 0.00 | 0.00 | 0.30 | 0.11 | 27 | Mixed Epithelial |
| Commd2  | 0.31 | 0.00 | 0.00 | 0.28 | 0.10 | 27 | Mixed Epithelial |
| Sod2    | 0.32 | 0.00 | 0.00 | 0.34 | 0.14 | 27 | Mixed Epithelial |
| Idh1    | 0.37 | 0.00 | 0.00 | 0.27 | 0.10 | 27 | Mixed Epithelial |
| Sod1    | 0.46 | 0.00 | 0.00 | 0.77 | 0.47 | 27 | Mixed Epithelial |
| mt-Nd4l | 0.34 | 0.00 | 0.00 | 0.71 | 0.38 | 27 | Mixed Epithelial |
| Mdh1    | 0.29 | 0.00 | 0.00 | 0.43 | 0.19 | 27 | Mixed Epithelial |
| Aldh2   | 0.28 | 0.00 | 0.00 | 0.64 | 0.33 | 27 | Mixed Epithelial |
| Dstn    | 0.39 | 0.00 | 0.00 | 0.80 | 0.51 | 27 | Mixed Epithelial |
| Ccnd2   | 0.34 | 0.00 | 0.00 | 0.56 | 0.28 | 27 | Mixed Epithelial |
| mt-Nd6  | 0.40 | 0.00 | 0.00 | 0.52 | 0.26 | 27 | Mixed Epithelial |
| Gm10222 | 0.34 | 0.00 | 0.00 | 0.72 | 0.43 | 27 | Mixed Epithelial |
| Dynll2  | 0.28 | 0.00 | 0.00 | 0.29 | 0.12 | 27 | Mixed Epithelial |
| Vimp    | 0.27 | 0.00 | 0.00 | 0.56 | 0.30 | 27 | Mixed Epithelial |
| Qsox1   | 0.25 | 0.00 | 0.00 | 0.25 | 0.10 | 27 | Mixed Epithelial |
| Gstp1   | 0.26 | 0.00 | 0.00 | 0.40 | 0.20 | 27 | Mixed Epithelial |
| Ppp3ca  | 0.32 | 0.00 | 0.00 | 0.52 | 0.28 | 27 | Mixed Epithelial |
| Hdgf    | 0.27 | 0.00 | 0.00 | 0.47 | 0.25 | 27 | Mixed Epithelial |
| Gpx4    | 0.28 | 0.00 | 0.00 | 0.62 | 0.38 | 27 | Mixed Epithelial |
| Mcpt8   | 4.49 | 0.00 | 0.00 | 0.61 | 0.00 | 28 | Myeloid Cell     |
| Cpa3    | 3.98 | 0.00 | 0.00 | 0.59 | 0.01 | 28 | Myeloid Cell     |
| Prss34  | 3.13 | 0.00 | 0.00 | 0.30 | 0.00 | 28 | Myeloid Cell     |
| Ccl4    | 3.01 | 0.00 | 0.00 | 0.42 | 0.01 | 28 | Myeloid Cell     |
| Gp49a   | 2.98 | 0.00 | 0.00 | 0.89 | 0.05 | 28 | Myeloid Cell     |
| Ccl3    | 2.97 | 0.00 | 0.00 | 0.61 | 0.01 | 28 | Myeloid Cell     |

|         |      |      |      |      |      |    |              |
|---------|------|------|------|------|------|----|--------------|
| Ccl9    | 2.96 | 0.00 | 0.00 | 0.69 | 0.03 | 28 | Myeloid Cell |
| Hdc     | 2.70 | 0.00 | 0.00 | 0.80 | 0.04 | 28 | Myeloid Cell |
| Alox5ap | 2.66 | 0.00 | 0.00 | 0.89 | 0.09 | 28 | Myeloid Cell |
| Lilrb4  | 2.63 | 0.00 | 0.00 | 0.80 | 0.06 | 28 | Myeloid Cell |
| Cd200r3 | 2.50 | 0.00 | 0.00 | 0.74 | 0.00 | 28 | Myeloid Cell |
| Cyp11a1 | 2.28 | 0.00 | 0.00 | 0.66 | 0.00 | 28 | Myeloid Cell |
| Il1rl1  | 2.18 | 0.00 | 0.00 | 0.46 | 0.01 | 28 | Myeloid Cell |
| Csf2rb  | 2.03 | 0.00 | 0.00 | 0.62 | 0.04 | 28 | Myeloid Cell |
| Cxcr2   | 1.93 | 0.00 | 0.00 | 0.45 | 0.02 | 28 | Myeloid Cell |
| Lat2    | 1.86 | 0.00 | 0.00 | 0.59 | 0.03 | 28 | Myeloid Cell |
| Ifitm7  | 1.86 | 0.00 | 0.00 | 0.47 | 0.03 | 28 | Myeloid Cell |
| Osm     | 1.82 | 0.00 | 0.00 | 0.36 | 0.01 | 28 | Myeloid Cell |
| Emilin2 | 1.68 | 0.00 | 0.00 | 0.45 | 0.02 | 28 | Myeloid Cell |
| Gpr183  | 1.66 | 0.00 | 0.00 | 0.42 | 0.02 | 28 | Myeloid Cell |
| Il4     | 1.54 | 0.00 | 0.00 | 0.31 | 0.00 | 28 | Myeloid Cell |
| Fcer1a  | 1.51 | 0.00 | 0.00 | 0.32 | 0.00 | 28 | Myeloid Cell |
| Sytl3   | 1.48 | 0.00 | 0.00 | 0.38 | 0.00 | 28 | Myeloid Cell |
| Ms4a2   | 1.37 | 0.00 | 0.00 | 0.29 | 0.00 | 28 | Myeloid Cell |
| Csf2rb2 | 1.36 | 0.00 | 0.00 | 0.34 | 0.01 | 28 | Myeloid Cell |
| Il18rap | 1.35 | 0.00 | 0.00 | 0.36 | 0.01 | 28 | Myeloid Cell |
| Rgs18   | 1.21 | 0.00 | 0.00 | 0.34 | 0.01 | 28 | Myeloid Cell |
| Rab44   | 1.20 | 0.00 | 0.00 | 0.31 | 0.01 | 28 | Myeloid Cell |
| P2rx1   | 1.06 | 0.00 | 0.00 | 0.26 | 0.01 | 28 | Myeloid Cell |
| Tyrobp  | 2.13 | 0.00 | 0.00 | 0.93 | 0.12 | 28 | Myeloid Cell |
| Cyp4f18 | 1.53 | 0.00 | 0.00 | 0.41 | 0.02 | 28 | Myeloid Cell |
| Rgs1    | 1.62 | 0.00 | 0.00 | 0.32 | 0.01 | 28 | Myeloid Cell |
| Hgf     | 1.46 | 0.00 | 0.00 | 0.29 | 0.01 | 28 | Myeloid Cell |
| Csf1    | 1.84 | 0.00 | 0.00 | 0.46 | 0.03 | 28 | Myeloid Cell |
| Fcer1g  | 1.74 | 0.00 | 0.00 | 0.85 | 0.11 | 28 | Myeloid Cell |
| Itgb7   | 1.37 | 0.00 | 0.00 | 0.43 | 0.03 | 28 | Myeloid Cell |
| Ifitm1  | 3.39 | 0.00 | 0.00 | 0.79 | 0.14 | 28 | Myeloid Cell |
| Tbc1d4  | 1.59 | 0.00 | 0.00 | 0.43 | 0.04 | 28 | Myeloid Cell |
| Gata2   | 2.02 | 0.00 | 0.00 | 0.79 | 0.14 | 28 | Myeloid Cell |
| Ccl6    | 2.75 | 0.00 | 0.00 | 0.67 | 0.10 | 28 | Myeloid Cell |
| Ccr2    | 1.64 | 0.00 | 0.00 | 0.61 | 0.07 | 28 | Myeloid Cell |
| Fxyd5   | 1.96 | 0.00 | 0.00 | 0.86 | 0.18 | 28 | Myeloid Cell |
| Tmem71  | 1.84 | 0.00 | 0.00 | 0.53 | 0.06 | 28 | Myeloid Cell |
| Laptn5  | 1.56 | 0.00 | 0.00 | 0.79 | 0.14 | 28 | Myeloid Cell |
| Fcgr3   | 1.41 | 0.00 | 0.00 | 0.45 | 0.04 | 28 | Myeloid Cell |
| Ikzf2   | 1.10 | 0.00 | 0.00 | 0.29 | 0.02 | 28 | Myeloid Cell |
| Srgn    | 2.11 | 0.00 | 0.00 | 0.98 | 0.33 | 28 | Myeloid Cell |
| Cd53    | 1.47 | 0.00 | 0.00 | 0.60 | 0.09 | 28 | Myeloid Cell |
| Plek    | 1.37 | 0.00 | 0.00 | 0.52 | 0.07 | 28 | Myeloid Cell |

|               |      |      |      |      |      |    |              |
|---------------|------|------|------|------|------|----|--------------|
| Rac2          | 1.51 | 0.00 | 0.00 | 0.65 | 0.11 | 28 | Myeloid Cell |
| Fyb           | 1.70 | 0.00 | 0.00 | 0.78 | 0.18 | 28 | Myeloid Cell |
| Gm7676        | 2.41 | 0.00 | 0.00 | 0.74 | 0.19 | 28 | Myeloid Cell |
| Selplg        | 1.32 | 0.00 | 0.00 | 0.43 | 0.05 | 28 | Myeloid Cell |
| Serpinb1a     | 2.09 | 0.00 | 0.00 | 0.39 | 0.05 | 28 | Myeloid Cell |
| Tec           | 1.33 | 0.00 | 0.00 | 0.32 | 0.03 | 28 | Myeloid Cell |
| Arhgdib       | 1.38 | 0.00 | 0.00 | 0.72 | 0.16 | 28 | Myeloid Cell |
| Arhgap15      | 1.21 | 0.00 | 0.00 | 0.38 | 0.05 | 28 | Myeloid Cell |
| Ccr1          | 1.08 | 0.00 | 0.00 | 0.32 | 0.04 | 28 | Myeloid Cell |
| Ptplad2       | 1.30 | 0.00 | 0.00 | 0.37 | 0.05 | 28 | Myeloid Cell |
| Lgals3        | 1.31 | 0.00 | 0.00 | 0.65 | 0.15 | 28 | Myeloid Cell |
| Plac8         | 1.24 | 0.00 | 0.00 | 0.70 | 0.17 | 28 | Myeloid Cell |
| Btk           | 1.13 | 0.00 | 0.00 | 0.31 | 0.04 | 28 | Myeloid Cell |
| Spn           | 0.92 | 0.00 | 0.00 | 0.26 | 0.03 | 28 | Myeloid Cell |
| Samsn1        | 1.19 | 0.00 | 0.00 | 0.40 | 0.07 | 28 | Myeloid Cell |
| Lcp1          | 1.38 | 0.00 | 0.00 | 0.72 | 0.23 | 28 | Myeloid Cell |
| Ncf2          | 1.01 | 0.00 | 0.00 | 0.30 | 0.04 | 28 | Myeloid Cell |
| Tnfaip8       | 1.45 | 0.00 | 0.00 | 0.47 | 0.10 | 28 | Myeloid Cell |
| Cd63          | 1.32 | 0.00 | 0.00 | 0.76 | 0.30 | 28 | Myeloid Cell |
| A430104N18Rik | 1.07 | 0.00 | 0.00 | 0.37 | 0.06 | 28 | Myeloid Cell |
| Hcst          | 1.05 | 0.00 | 0.00 | 0.28 | 0.04 | 28 | Myeloid Cell |
| Gmfg          | 1.21 | 0.00 | 0.00 | 0.54 | 0.14 | 28 | Myeloid Cell |
| Sh3bgrl3      | 1.26 | 0.00 | 0.00 | 0.79 | 0.34 | 28 | Myeloid Cell |
| Ptpre         | 1.07 | 0.00 | 0.00 | 0.35 | 0.06 | 28 | Myeloid Cell |
| Taldo1        | 1.32 | 0.00 | 0.00 | 0.70 | 0.26 | 28 | Myeloid Cell |
| Hk2           | 1.13 | 0.00 | 0.00 | 0.31 | 0.05 | 28 | Myeloid Cell |
| Gm6169        | 1.30 | 0.00 | 0.00 | 0.48 | 0.13 | 28 | Myeloid Cell |
| Ncf1          | 1.20 | 0.00 | 0.00 | 0.36 | 0.07 | 28 | Myeloid Cell |
| Hmha1         | 1.04 | 0.00 | 0.00 | 0.39 | 0.08 | 28 | Myeloid Cell |
| Klhl6         | 0.99 | 0.00 | 0.00 | 0.27 | 0.04 | 28 | Myeloid Cell |
| Coro2a        | 1.16 | 0.00 | 0.00 | 0.35 | 0.07 | 28 | Myeloid Cell |
| Prr13         | 1.14 | 0.00 | 0.00 | 0.49 | 0.13 | 28 | Myeloid Cell |
| Lgals1        | 1.00 | 0.00 | 0.00 | 0.89 | 0.42 | 28 | Myeloid Cell |
| Plp2          | 1.29 | 0.00 | 0.00 | 0.47 | 0.13 | 28 | Myeloid Cell |
| Actb          | 0.81 | 0.00 | 0.00 | 1.00 | 0.98 | 28 | Myeloid Cell |
| Syne1         | 1.32 | 0.00 | 0.00 | 0.43 | 0.11 | 28 | Myeloid Cell |
| Lst1          | 0.93 | 0.00 | 0.00 | 0.35 | 0.07 | 28 | Myeloid Cell |
| Crlf3         | 1.18 | 0.00 | 0.00 | 0.49 | 0.14 | 28 | Myeloid Cell |
| Cd37          | 0.78 | 0.00 | 0.00 | 0.37 | 0.08 | 28 | Myeloid Cell |
| Cotl1         | 1.16 | 0.00 | 0.00 | 0.55 | 0.18 | 28 | Myeloid Cell |
| Emb           | 1.14 | 0.00 | 0.00 | 0.43 | 0.11 | 28 | Myeloid Cell |
| Was           | 0.93 | 0.00 | 0.00 | 0.30 | 0.06 | 28 | Myeloid Cell |
| Tmsb4x        | 1.10 | 0.00 | 0.00 | 0.98 | 0.89 | 28 | Myeloid Cell |

|          |      |      |      |      |      |    |              |
|----------|------|------|------|------|------|----|--------------|
| Arpc5    | 1.00 | 0.00 | 0.00 | 0.88 | 0.56 | 28 | Myeloid Cell |
| Lrrc58   | 0.80 | 0.00 | 0.00 | 0.98 | 0.91 | 28 | Myeloid Cell |
| Cd52     | 0.79 | 0.00 | 0.00 | 0.64 | 0.20 | 28 | Myeloid Cell |
| Apbb1ip  | 0.95 | 0.00 | 0.00 | 0.39 | 0.09 | 28 | Myeloid Cell |
| Igsf6    | 1.12 | 0.00 | 0.00 | 0.25 | 0.04 | 28 | Myeloid Cell |
| Cd84     | 1.00 | 0.00 | 0.00 | 0.27 | 0.05 | 28 | Myeloid Cell |
| Arhgap30 | 0.94 | 0.00 | 0.00 | 0.40 | 0.10 | 28 | Myeloid Cell |
| Fam46a   | 1.20 | 0.00 | 0.00 | 0.38 | 0.10 | 28 | Myeloid Cell |
| Coro1a   | 0.92 | 0.00 | 0.00 | 0.39 | 0.10 | 28 | Myeloid Cell |
| Pla2g7   | 0.88 | 0.00 | 0.00 | 0.29 | 0.06 | 28 | Myeloid Cell |
| Rgs2     | 1.27 | 0.00 | 0.00 | 0.66 | 0.28 | 28 | Myeloid Cell |
| Tmem64   | 1.08 | 0.00 | 0.00 | 0.38 | 0.11 | 28 | Myeloid Cell |
| Fermt3   | 0.85 | 0.00 | 0.00 | 0.29 | 0.06 | 28 | Myeloid Cell |
| Anxa1    | 1.02 | 0.00 | 0.00 | 0.52 | 0.19 | 28 | Myeloid Cell |
| Runx1    | 1.01 | 0.00 | 0.00 | 0.30 | 0.07 | 28 | Myeloid Cell |
| Man2b1   | 1.00 | 0.00 | 0.00 | 0.30 | 0.07 | 28 | Myeloid Cell |
| Arrb2    | 1.00 | 0.00 | 0.00 | 0.28 | 0.07 | 28 | Myeloid Cell |
| Plgrkt   | 1.05 | 0.00 | 0.00 | 0.37 | 0.11 | 28 | Myeloid Cell |
| Ctsd     | 1.01 | 0.00 | 0.00 | 0.57 | 0.25 | 28 | Myeloid Cell |
| Gsr      | 0.95 | 0.00 | 0.00 | 0.33 | 0.09 | 28 | Myeloid Cell |
| Fam105a  | 0.90 | 0.00 | 0.00 | 0.27 | 0.06 | 28 | Myeloid Cell |
| Rplp1    | 0.58 | 0.00 | 0.00 | 0.99 | 0.90 | 28 | Myeloid Cell |
| Ptpn18   | 0.95 | 0.00 | 0.00 | 0.43 | 0.14 | 28 | Myeloid Cell |
| Glpr2    | 0.80 | 0.00 | 0.00 | 0.26 | 0.06 | 28 | Myeloid Cell |
| Capg     | 0.90 | 0.00 | 0.00 | 0.35 | 0.11 | 28 | Myeloid Cell |
| S100a10  | 0.95 | 0.00 | 0.00 | 0.70 | 0.38 | 28 | Myeloid Cell |
| Mpc2     | 1.24 | 0.00 | 0.00 | 0.52 | 0.24 | 28 | Myeloid Cell |
| Rfc2     | 0.79 | 0.00 | 0.00 | 0.30 | 0.08 | 28 | Myeloid Cell |
| Klf6     | 1.06 | 0.00 | 0.00 | 0.67 | 0.36 | 28 | Myeloid Cell |
| Casp3    | 0.94 | 0.00 | 0.00 | 0.29 | 0.08 | 28 | Myeloid Cell |
| Gm2a     | 0.75 | 0.00 | 0.00 | 0.32 | 0.09 | 28 | Myeloid Cell |
| Egr1     | 1.30 | 0.00 | 0.00 | 0.39 | 0.14 | 28 | Myeloid Cell |
| H2-T23   | 0.86 | 0.00 | 0.00 | 0.38 | 0.13 | 28 | Myeloid Cell |
| Stk17b   | 0.84 | 0.00 | 0.00 | 0.26 | 0.06 | 28 | Myeloid Cell |
| Gm9843   | 0.55 | 0.00 | 0.00 | 0.98 | 0.93 | 28 | Myeloid Cell |
| Arpc1b   | 0.83 | 0.00 | 0.00 | 0.68 | 0.37 | 28 | Myeloid Cell |
| Ii18r1   | 1.12 | 0.00 | 0.00 | 0.27 | 0.07 | 28 | Myeloid Cell |
| Limd2    | 0.92 | 0.00 | 0.00 | 0.42 | 0.15 | 28 | Myeloid Cell |
| Rps9     | 0.50 | 0.00 | 0.00 | 0.97 | 0.91 | 28 | Myeloid Cell |
| Os9      | 1.03 | 0.00 | 0.00 | 0.48 | 0.21 | 28 | Myeloid Cell |
| Ptprc    | 0.64 | 0.00 | 0.00 | 0.43 | 0.15 | 28 | Myeloid Cell |
| Grina    | 0.84 | 0.00 | 0.00 | 0.26 | 0.07 | 28 | Myeloid Cell |
| Fau      | 0.56 | 0.00 | 0.00 | 0.95 | 0.87 | 28 | Myeloid Cell |

|          |      |      |      |      |      |    |              |
|----------|------|------|------|------|------|----|--------------|
| Neat1    | 0.78 | 0.00 | 0.00 | 0.59 | 0.27 | 28 | Myeloid Cell |
| Zfp36    | 0.96 | 0.00 | 0.00 | 0.42 | 0.17 | 28 | Myeloid Cell |
| Leprotl1 | 0.89 | 0.00 | 0.00 | 0.40 | 0.15 | 28 | Myeloid Cell |
| Gpx1     | 0.74 | 0.00 | 0.00 | 0.71 | 0.43 | 28 | Myeloid Cell |
| Rps23    | 0.67 | 0.00 | 0.00 | 0.91 | 0.79 | 28 | Myeloid Cell |
| Slfn2    | 0.87 | 0.00 | 0.00 | 0.38 | 0.13 | 28 | Myeloid Cell |
| Itm2b    | 0.62 | 0.00 | 0.00 | 0.92 | 0.76 | 28 | Myeloid Cell |
| Gm10073  | 0.56 | 0.00 | 0.00 | 0.95 | 0.86 | 28 | Myeloid Cell |
| Junb     | 1.17 | 0.00 | 0.00 | 0.46 | 0.20 | 28 | Myeloid Cell |
| Sec11c   | 0.85 | 0.00 | 0.00 | 0.44 | 0.18 | 28 | Myeloid Cell |
| Ptprcap  | 0.62 | 0.00 | 0.00 | 0.27 | 0.07 | 28 | Myeloid Cell |
| Crip1    | 0.65 | 0.00 | 0.00 | 0.79 | 0.48 | 28 | Myeloid Cell |
| Pfn1     | 0.80 | 0.00 | 0.00 | 0.71 | 0.46 | 28 | Myeloid Cell |
| Sh3kbp1  | 0.87 | 0.00 | 0.00 | 0.32 | 0.11 | 28 | Myeloid Cell |
| Sfxn1    | 0.73 | 0.00 | 0.00 | 0.25 | 0.07 | 28 | Myeloid Cell |
| Creg1    | 0.83 | 0.00 | 0.00 | 0.42 | 0.17 | 28 | Myeloid Cell |
| Rnf130   | 0.86 | 0.00 | 0.00 | 0.25 | 0.07 | 28 | Myeloid Cell |
| Pabpc1   | 0.56 | 0.00 | 0.00 | 0.94 | 0.81 | 28 | Myeloid Cell |
| Pygl     | 0.81 | 0.00 | 0.00 | 0.32 | 0.11 | 28 | Myeloid Cell |
| Taok3    | 0.81 | 0.00 | 0.00 | 0.43 | 0.19 | 28 | Myeloid Cell |
| Aldoa    | 0.93 | 0.00 | 0.00 | 0.43 | 0.19 | 28 | Myeloid Cell |
| Arpc2    | 0.65 | 0.00 | 0.00 | 0.81 | 0.61 | 28 | Myeloid Cell |
| Rps11    | 0.58 | 0.00 | 0.00 | 0.88 | 0.76 | 28 | Myeloid Cell |
| Ier3     | 1.31 | 0.00 | 0.00 | 0.34 | 0.14 | 28 | Myeloid Cell |
| Stk4     | 0.69 | 0.00 | 0.00 | 0.36 | 0.14 | 28 | Myeloid Cell |
| Pim1     | 0.94 | 0.00 | 0.00 | 0.28 | 0.09 | 28 | Myeloid Cell |
| Cd9      | 0.70 | 0.00 | 0.00 | 0.60 | 0.35 | 28 | Myeloid Cell |
| Cd47     | 0.70 | 0.00 | 0.00 | 0.65 | 0.43 | 28 | Myeloid Cell |
| Prkcd    | 0.72 | 0.00 | 0.00 | 0.30 | 0.11 | 28 | Myeloid Cell |
| Ostf1    | 0.67 | 0.00 | 0.00 | 0.48 | 0.26 | 28 | Myeloid Cell |
| Rpl38    | 0.54 | 0.00 | 0.00 | 0.87 | 0.73 | 28 | Myeloid Cell |
| Tspo     | 0.70 | 0.00 | 0.00 | 0.48 | 0.26 | 28 | Myeloid Cell |
| Rnasel   | 0.61 | 0.00 | 0.00 | 0.28 | 0.10 | 28 | Myeloid Cell |
| Clic1    | 0.66 | 0.00 | 0.00 | 0.59 | 0.38 | 28 | Myeloid Cell |
| H2-D1    | 0.47 | 0.00 | 0.00 | 0.75 | 0.50 | 28 | Myeloid Cell |
| Vasp     | 0.71 | 0.00 | 0.00 | 0.39 | 0.19 | 28 | Myeloid Cell |
| Ldha     | 0.77 | 0.00 | 0.00 | 0.49 | 0.29 | 28 | Myeloid Cell |
| Lbr      | 0.77 | 0.00 | 0.00 | 0.30 | 0.12 | 28 | Myeloid Cell |
| Cd97     | 0.67 | 0.00 | 0.00 | 0.38 | 0.18 | 28 | Myeloid Cell |
| Ncor1    | 0.67 | 0.00 | 0.00 | 0.61 | 0.40 | 28 | Myeloid Cell |
| Herc1    | 0.89 | 0.00 | 0.00 | 0.29 | 0.13 | 28 | Myeloid Cell |
| Trim12c  | 0.68 | 0.00 | 0.00 | 0.25 | 0.09 | 28 | Myeloid Cell |
| Actg1    | 0.61 | 0.00 | 0.00 | 0.81 | 0.76 | 28 | Myeloid Cell |

|               |      |      |      |      |      |    |              |
|---------------|------|------|------|------|------|----|--------------|
| Fam111a       | 0.60 | 0.00 | 0.00 | 0.35 | 0.15 | 28 | Myeloid Cell |
| Fos           | 0.73 | 0.00 | 0.00 | 0.39 | 0.19 | 28 | Myeloid Cell |
| Arid3a        | 0.58 | 0.00 | 0.00 | 0.26 | 0.10 | 28 | Myeloid Cell |
| Tagln2        | 0.59 | 0.00 | 0.00 | 0.65 | 0.45 | 28 | Myeloid Cell |
| Tln1          | 0.67 | 0.00 | 0.00 | 0.58 | 0.40 | 28 | Myeloid Cell |
| Arl4c         | 0.87 | 0.00 | 0.00 | 0.25 | 0.10 | 28 | Myeloid Cell |
| Myh9          | 0.74 | 0.00 | 0.00 | 0.53 | 0.33 | 28 | Myeloid Cell |
| Rps24         | 0.33 | 0.00 | 0.00 | 0.95 | 0.88 | 28 | Myeloid Cell |
| Zyx           | 0.65 | 0.00 | 0.00 | 0.37 | 0.20 | 28 | Myeloid Cell |
| Prkacb        | 0.66 | 0.00 | 0.00 | 0.25 | 0.11 | 28 | Myeloid Cell |
| Gm11808       | 0.40 | 0.00 | 0.00 | 0.86 | 0.77 | 28 | Myeloid Cell |
| Anp32a        | 0.41 | 0.00 | 0.00 | 0.78 | 0.60 | 28 | Myeloid Cell |
| Phf2011       | 0.70 | 0.00 | 0.00 | 0.45 | 0.29 | 28 | Myeloid Cell |
| Cnn2          | 0.65 | 0.00 | 0.00 | 0.55 | 0.39 | 28 | Myeloid Cell |
| Ier2          | 0.79 | 0.00 | 0.00 | 0.41 | 0.25 | 28 | Myeloid Cell |
| Emp3          | 0.62 | 0.00 | 0.00 | 0.38 | 0.21 | 28 | Myeloid Cell |
| Rpl39         | 0.35 | 0.00 | 0.00 | 0.89 | 0.80 | 28 | Myeloid Cell |
| Rpl32         | 0.32 | 0.00 | 0.00 | 0.92 | 0.84 | 28 | Myeloid Cell |
| Sptssa        | 0.79 | 0.00 | 0.00 | 0.35 | 0.20 | 28 | Myeloid Cell |
| Gm9846        | 0.26 | 0.00 | 0.00 | 0.98 | 0.90 | 28 | Myeloid Cell |
| Aprt          | 0.62 | 0.00 | 0.00 | 0.32 | 0.17 | 28 | Myeloid Cell |
| Actr2         | 0.57 | 0.00 | 0.00 | 0.44 | 0.28 | 28 | Myeloid Cell |
| Iqgap1        | 0.56 | 0.00 | 0.00 | 0.61 | 0.45 | 28 | Myeloid Cell |
| Cfl1          | 0.42 | 0.00 | 0.00 | 0.72 | 0.58 | 28 | Myeloid Cell |
| Gm10116       | 0.34 | 0.00 | 0.00 | 0.76 | 0.63 | 28 | Myeloid Cell |
| Akap13        | 0.63 | 0.00 | 0.00 | 0.43 | 0.27 | 28 | Myeloid Cell |
| Ftl1          | 0.41 | 0.00 | 0.00 | 0.70 | 0.57 | 28 | Myeloid Cell |
| D4Wsu53e      | 0.38 | 0.00 | 0.00 | 0.71 | 0.60 | 28 | Myeloid Cell |
| Jak1          | 0.46 | 0.00 | 0.00 | 0.42 | 0.26 | 28 | Myeloid Cell |
| Gng2          | 0.52 | 0.00 | 0.00 | 0.25 | 0.12 | 28 | Myeloid Cell |
| Cap1          | 0.52 | 0.00 | 0.00 | 0.31 | 0.17 | 28 | Myeloid Cell |
| Srpk1         | 0.67 | 0.00 | 0.00 | 0.25 | 0.13 | 28 | Myeloid Cell |
| 2410006H16Rik | 0.64 | 0.00 | 0.00 | 0.41 | 0.26 | 28 | Myeloid Cell |
| Cetn2         | 0.57 | 0.00 | 0.00 | 0.33 | 0.19 | 28 | Myeloid Cell |
| Ywhaz         | 0.45 | 0.00 | 0.00 | 0.67 | 0.51 | 28 | Myeloid Cell |
| Wdr89         | 0.27 | 0.00 | 0.00 | 0.95 | 0.89 | 28 | Myeloid Cell |
| Tmem50a       | 0.45 | 0.00 | 0.00 | 0.58 | 0.45 | 28 | Myeloid Cell |
| Rnh1          | 0.55 | 0.00 | 0.00 | 0.29 | 0.16 | 28 | Myeloid Cell |
| Samhd1        | 0.52 | 0.00 | 0.00 | 0.35 | 0.20 | 28 | Myeloid Cell |
| Gpx4          | 0.50 | 0.00 | 0.00 | 0.52 | 0.38 | 28 | Myeloid Cell |
| Cyba          | 0.32 | 0.00 | 0.00 | 0.47 | 0.30 | 28 | Myeloid Cell |
| Gm17087       | 0.54 | 0.00 | 0.00 | 0.38 | 0.24 | 28 | Myeloid Cell |
| Rpl17         | 0.37 | 0.00 | 0.00 | 0.68 | 0.54 | 28 | Myeloid Cell |

|           |      |      |      |      |      |    |              |
|-----------|------|------|------|------|------|----|--------------|
| Clint1    | 0.64 | 0.00 | 0.00 | 0.25 | 0.14 | 28 | Myeloid Cell |
| Hmgb2     | 0.39 | 0.00 | 0.00 | 0.58 | 0.43 | 28 | Myeloid Cell |
| Rpl10     | 0.32 | 0.00 | 0.00 | 0.81 | 0.71 | 28 | Myeloid Cell |
| Nt5c      | 0.50 | 0.00 | 0.00 | 0.29 | 0.16 | 28 | Myeloid Cell |
| Capzb     | 0.47 | 0.00 | 0.00 | 0.55 | 0.42 | 28 | Myeloid Cell |
| Gltscr2   | 0.43 | 0.00 | 0.00 | 0.60 | 0.48 | 28 | Myeloid Cell |
| Mrpl33    | 0.56 | 0.00 | 0.00 | 0.42 | 0.30 | 28 | Myeloid Cell |
| Myl12b    | 0.37 | 0.00 | 0.00 | 0.73 | 0.60 | 28 | Myeloid Cell |
| Serp1     | 0.49 | 0.00 | 0.00 | 0.37 | 0.23 | 28 | Myeloid Cell |
| Dusp6     | 0.57 | 0.00 | 0.00 | 0.31 | 0.18 | 28 | Myeloid Cell |
| Tax1bp1   | 0.43 | 0.00 | 0.00 | 0.71 | 0.64 | 28 | Myeloid Cell |
| Rpl18a    | 0.30 | 0.00 | 0.00 | 0.86 | 0.82 | 28 | Myeloid Cell |
| Itm2c     | 0.53 | 0.00 | 0.00 | 0.35 | 0.23 | 28 | Myeloid Cell |
| Lrrfip1   | 0.48 | 0.00 | 0.01 | 0.39 | 0.26 | 28 | Myeloid Cell |
| Mir682    | 0.28 | 0.00 | 0.01 | 0.89 | 0.85 | 28 | Myeloid Cell |
| Rps10-ps1 | 0.31 | 0.00 | 0.01 | 0.86 | 0.77 | 28 | Myeloid Cell |
| Gm5244    | 0.59 | 0.00 | 0.01 | 0.40 | 0.29 | 28 | Myeloid Cell |
| Rpl37a    | 0.26 | 0.00 | 0.01 | 0.89 | 0.83 | 28 | Myeloid Cell |
| Ifitm2    | 0.42 | 0.00 | 0.01 | 0.46 | 0.32 | 28 | Myeloid Cell |
| Sub1      | 0.43 | 0.00 | 0.01 | 0.61 | 0.51 | 28 | Myeloid Cell |
| Ndufa6    | 0.43 | 0.00 | 0.01 | 0.54 | 0.43 | 28 | Myeloid Cell |
| Cbfa2t3   | 0.33 | 0.00 | 0.01 | 0.27 | 0.15 | 28 | Myeloid Cell |
| Cdc42se2  | 0.40 | 0.00 | 0.01 | 0.25 | 0.14 | 28 | Myeloid Cell |
| Txnip     | 0.53 | 0.00 | 0.01 | 0.38 | 0.26 | 28 | Myeloid Cell |
| Rpl27-ps3 | 0.32 | 0.00 | 0.02 | 0.82 | 0.76 | 28 | Myeloid Cell |
| Rpl34     | 0.25 | 0.00 | 0.02 | 0.87 | 0.80 | 28 | Myeloid Cell |
| Tsc22d4   | 0.49 | 0.00 | 0.03 | 0.40 | 0.28 | 28 | Myeloid Cell |
| Adipor1   | 0.47 | 0.00 | 0.04 | 0.36 | 0.24 | 28 | Myeloid Cell |
| Gm17511   | 0.44 | 0.00 | 0.04 | 0.66 | 0.61 | 28 | Myeloid Cell |
| mt-Rnr1   | 0.32 | 0.00 | 0.05 | 0.58 | 0.47 | 28 | Myeloid Cell |
| Fgfr1op2  | 0.50 | 0.00 | 0.05 | 0.40 | 0.28 | 28 | Myeloid Cell |
| Lamp3     | 1.63 | 0.00 | 0.00 | 0.85 | 0.12 | 29 | AT2 Cell     |
| Cxcl15    | 1.62 | 0.00 | 0.00 | 0.91 | 0.15 | 29 | AT2 Cell     |
| Hc        | 1.39 | 0.00 | 0.00 | 0.82 | 0.12 | 29 | AT2 Cell     |
| Egfl6     | 1.30 | 0.00 | 0.00 | 0.69 | 0.08 | 29 | AT2 Cell     |
| Sftpd     | 1.50 | 0.00 | 0.00 | 0.96 | 0.16 | 29 | AT2 Cell     |
| Chi3l1    | 1.36 | 0.00 | 0.00 | 0.78 | 0.11 | 29 | AT2 Cell     |
| Sftpb     | 1.58 | 0.00 | 0.00 | 0.98 | 0.18 | 29 | AT2 Cell     |
| Wfdc2     | 1.53 | 0.00 | 0.00 | 0.91 | 0.17 | 29 | AT2 Cell     |
| Slc34a2   | 1.47 | 0.00 | 0.00 | 0.91 | 0.16 | 29 | AT2 Cell     |
| S100g     | 1.33 | 0.00 | 0.00 | 0.80 | 0.12 | 29 | AT2 Cell     |
| Sftpa1    | 1.75 | 0.00 | 0.00 | 0.97 | 0.21 | 29 | AT2 Cell     |
| Bex4      | 1.31 | 0.00 | 0.00 | 0.81 | 0.13 | 29 | AT2 Cell     |

|              |      |      |      |      |      |    |          |
|--------------|------|------|------|------|------|----|----------|
| Bex2         | 1.53 | 0.00 | 0.00 | 0.70 | 0.10 | 29 | AT2 Cell |
| Sfta2        | 1.30 | 0.00 | 0.00 | 0.86 | 0.16 | 29 | AT2 Cell |
| Bex1         | 1.21 | 0.00 | 0.00 | 0.68 | 0.10 | 29 | AT2 Cell |
| Spc24        | 1.19 | 0.00 | 0.00 | 0.45 | 0.05 | 29 | AT2 Cell |
| Muc1         | 1.10 | 0.00 | 0.00 | 0.63 | 0.09 | 29 | AT2 Cell |
| Dram1        | 1.25 | 0.00 | 0.00 | 0.69 | 0.12 | 29 | AT2 Cell |
| Prc1         | 1.36 | 0.00 | 0.00 | 0.51 | 0.07 | 29 | AT2 Cell |
| Etv5         | 0.98 | 0.00 | 0.00 | 0.50 | 0.06 | 29 | AT2 Cell |
| D17H6S56E-5  | 1.85 | 0.00 | 0.00 | 0.61 | 0.10 | 29 | AT2 Cell |
| Tinag        | 0.77 | 0.00 | 0.00 | 0.37 | 0.04 | 29 | AT2 Cell |
| Lpcat1       | 1.20 | 0.00 | 0.00 | 0.85 | 0.18 | 29 | AT2 Cell |
| Lgi3         | 0.98 | 0.00 | 0.00 | 0.56 | 0.08 | 29 | AT2 Cell |
| Mki67        | 1.43 | 0.00 | 0.00 | 0.67 | 0.12 | 29 | AT2 Cell |
| Pbk          | 0.88 | 0.00 | 0.00 | 0.34 | 0.03 | 29 | AT2 Cell |
| Top2a        | 1.42 | 0.00 | 0.00 | 0.63 | 0.11 | 29 | AT2 Cell |
| Cenpf        | 1.45 | 0.00 | 0.00 | 0.52 | 0.08 | 29 | AT2 Cell |
| Cdc20        | 1.18 | 0.00 | 0.00 | 0.40 | 0.05 | 29 | AT2 Cell |
| Ppp1r14c     | 1.04 | 0.00 | 0.00 | 0.63 | 0.11 | 29 | AT2 Cell |
| Birc5        | 1.04 | 0.00 | 0.00 | 0.45 | 0.06 | 29 | AT2 Cell |
| Epcam        | 1.06 | 0.00 | 0.00 | 0.57 | 0.10 | 29 | AT2 Cell |
| Cbr2         | 0.88 | 0.00 | 0.00 | 0.78 | 0.17 | 29 | AT2 Cell |
| RP23-45G16.5 | 0.93 | 0.00 | 0.00 | 0.39 | 0.05 | 29 | AT2 Cell |
| Rbpjl        | 0.79 | 0.00 | 0.00 | 0.45 | 0.06 | 29 | AT2 Cell |
| Cd74         | 0.81 | 0.00 | 0.00 | 0.65 | 0.13 | 29 | AT2 Cell |
| Tex15        | 0.67 | 0.00 | 0.00 | 0.29 | 0.03 | 29 | AT2 Cell |
| Spc25        | 0.98 | 0.00 | 0.00 | 0.39 | 0.05 | 29 | AT2 Cell |
| Lyz1         | 1.34 | 0.00 | 0.00 | 0.76 | 0.19 | 29 | AT2 Cell |
| Nusap1       | 1.00 | 0.00 | 0.00 | 0.41 | 0.06 | 29 | AT2 Cell |
| Il33         | 0.66 | 0.00 | 0.00 | 0.33 | 0.04 | 29 | AT2 Cell |
| Cldn18       | 0.68 | 0.00 | 0.00 | 0.77 | 0.18 | 29 | AT2 Cell |
| Scd1         | 0.96 | 0.00 | 0.00 | 0.52 | 0.09 | 29 | AT2 Cell |
| Pla2g1b      | 0.69 | 0.00 | 0.00 | 0.37 | 0.05 | 29 | AT2 Cell |
| Napsa        | 1.08 | 0.00 | 0.00 | 0.79 | 0.20 | 29 | AT2 Cell |
| Sdc4         | 1.11 | 0.00 | 0.00 | 0.82 | 0.23 | 29 | AT2 Cell |
| Irx3         | 0.91 | 0.00 | 0.00 | 0.46 | 0.08 | 29 | AT2 Cell |
| Ckap2        | 0.85 | 0.00 | 0.00 | 0.35 | 0.05 | 29 | AT2 Cell |
| Spink5       | 1.17 | 0.00 | 0.00 | 0.46 | 0.08 | 29 | AT2 Cell |
| Ces1d        | 0.99 | 0.00 | 0.00 | 0.72 | 0.17 | 29 | AT2 Cell |
| Sftpc        | 1.87 | 0.00 | 0.00 | 0.97 | 0.63 | 29 | AT2 Cell |
| Ptpfrf       | 0.89 | 0.00 | 0.00 | 0.69 | 0.16 | 29 | AT2 Cell |
| Kif23        | 0.81 | 0.00 | 0.00 | 0.39 | 0.06 | 29 | AT2 Cell |
| Fabp5        | 0.96 | 0.00 | 0.00 | 0.61 | 0.13 | 29 | AT2 Cell |
| Lyz2         | 1.18 | 0.00 | 0.00 | 0.84 | 0.27 | 29 | AT2 Cell |

|               |      |      |      |      |      |    |          |
|---------------|------|------|------|------|------|----|----------|
| H2-Aa         | 0.53 | 0.00 | 0.00 | 0.48 | 0.08 | 29 | AT2 Cell |
| Kif11         | 0.70 | 0.00 | 0.00 | 0.32 | 0.04 | 29 | AT2 Cell |
| Hmmr          | 0.76 | 0.00 | 0.00 | 0.34 | 0.05 | 29 | AT2 Cell |
| Abca3         | 0.87 | 0.00 | 0.00 | 0.58 | 0.12 | 29 | AT2 Cell |
| Lcn2          | 0.76 | 0.00 | 0.00 | 0.43 | 0.07 | 29 | AT2 Cell |
| Kif20b        | 0.86 | 0.00 | 0.00 | 0.41 | 0.07 | 29 | AT2 Cell |
| Nkx2-1        | 0.75 | 0.00 | 0.00 | 0.52 | 0.10 | 29 | AT2 Cell |
| Ager          | 0.28 | 0.00 | 0.00 | 0.73 | 0.17 | 29 | AT2 Cell |
| Car8          | 0.77 | 0.00 | 0.00 | 0.45 | 0.08 | 29 | AT2 Cell |
| Aldh1a7       | 0.77 | 0.00 | 0.00 | 0.34 | 0.05 | 29 | AT2 Cell |
| Ube2c         | 1.23 | 0.00 | 0.00 | 0.35 | 0.05 | 29 | AT2 Cell |
| Cdh1          | 0.76 | 0.00 | 0.00 | 0.45 | 0.08 | 29 | AT2 Cell |
| Wbp5          | 1.17 | 0.00 | 0.00 | 0.96 | 0.48 | 29 | AT2 Cell |
| Alcam         | 0.87 | 0.00 | 0.00 | 0.81 | 0.23 | 29 | AT2 Cell |
| 2810417H13Rik | 0.90 | 0.00 | 0.00 | 0.45 | 0.08 | 29 | AT2 Cell |
| Hist1h2ag     | 1.24 | 0.00 | 0.00 | 0.53 | 0.12 | 29 | AT2 Cell |
| Cdca3         | 0.72 | 0.00 | 0.00 | 0.29 | 0.04 | 29 | AT2 Cell |
| Acsl4         | 0.98 | 0.00 | 0.00 | 0.54 | 0.12 | 29 | AT2 Cell |
| Sgol2         | 0.75 | 0.00 | 0.00 | 0.31 | 0.04 | 29 | AT2 Cell |
| Tc2n          | 0.77 | 0.00 | 0.00 | 0.30 | 0.04 | 29 | AT2 Cell |
| Stmn1         | 1.30 | 0.00 | 0.00 | 0.73 | 0.23 | 29 | AT2 Cell |
| Trf           | 0.84 | 0.00 | 0.00 | 0.49 | 0.10 | 29 | AT2 Cell |
| Apoc1         | 0.62 | 0.00 | 0.00 | 0.31 | 0.04 | 29 | AT2 Cell |
| Cdca8         | 0.74 | 0.00 | 0.00 | 0.34 | 0.05 | 29 | AT2 Cell |
| Hist1h2ak     | 0.95 | 0.00 | 0.00 | 0.41 | 0.08 | 29 | AT2 Cell |
| Hist1h2ad     | 1.13 | 0.00 | 0.00 | 0.49 | 0.11 | 29 | AT2 Cell |
| Npc2          | 0.89 | 0.00 | 0.00 | 0.98 | 0.54 | 29 | AT2 Cell |
| Knstrn        | 0.74 | 0.00 | 0.00 | 0.29 | 0.04 | 29 | AT2 Cell |
| Cks2          | 1.08 | 0.00 | 0.00 | 0.42 | 0.08 | 29 | AT2 Cell |
| Mal           | 0.66 | 0.00 | 0.00 | 0.32 | 0.05 | 29 | AT2 Cell |
| Atp6v1c2      | 0.61 | 0.00 | 0.00 | 0.33 | 0.05 | 29 | AT2 Cell |
| Hist1h2ah     | 1.07 | 0.00 | 0.00 | 0.46 | 0.10 | 29 | AT2 Cell |
| Ccnb2         | 0.87 | 0.00 | 0.00 | 0.35 | 0.06 | 29 | AT2 Cell |
| Hist1h2ac     | 1.13 | 0.00 | 0.00 | 0.48 | 0.11 | 29 | AT2 Cell |
| Hist1h2ab     | 0.97 | 0.00 | 0.00 | 0.45 | 0.09 | 29 | AT2 Cell |
| Hist1h2ap     | 1.40 | 0.00 | 0.00 | 0.57 | 0.15 | 29 | AT2 Cell |
| Atp1b1        | 0.67 | 0.00 | 0.00 | 0.70 | 0.19 | 29 | AT2 Cell |
| Hist1h2ai     | 1.01 | 0.00 | 0.00 | 0.46 | 0.10 | 29 | AT2 Cell |
| Spint2        | 0.68 | 0.00 | 0.00 | 0.51 | 0.11 | 29 | AT2 Cell |
| Hist1h2an     | 1.11 | 0.00 | 0.00 | 0.43 | 0.09 | 29 | AT2 Cell |
| Ngfrap1       | 0.99 | 0.00 | 0.00 | 0.71 | 0.23 | 29 | AT2 Cell |
| Ctsh          | 0.81 | 0.00 | 0.00 | 0.71 | 0.21 | 29 | AT2 Cell |
| Hist1h2af     | 1.09 | 0.00 | 0.00 | 0.43 | 0.09 | 29 | AT2 Cell |

|               |      |      |      |      |      |    |          |
|---------------|------|------|------|------|------|----|----------|
| Smc2          | 1.02 | 0.00 | 0.00 | 0.54 | 0.14 | 29 | AT2 Cell |
| Cenpe         | 0.87 | 0.00 | 0.00 | 0.40 | 0.08 | 29 | AT2 Cell |
| Cdk1          | 0.84 | 0.00 | 0.00 | 0.32 | 0.05 | 29 | AT2 Cell |
| Cldn7         | 0.64 | 0.00 | 0.00 | 0.41 | 0.08 | 29 | AT2 Cell |
| Ctsc          | 0.85 | 0.00 | 0.00 | 0.67 | 0.19 | 29 | AT2 Cell |
| Sdc1          | 0.74 | 0.00 | 0.00 | 0.51 | 0.12 | 29 | AT2 Cell |
| Retnla        | 2.55 | 0.00 | 0.00 | 0.45 | 0.11 | 29 | AT2 Cell |
| Pi4k2b        | 0.64 | 0.00 | 0.00 | 0.46 | 0.10 | 29 | AT2 Cell |
| Hist1h2ao     | 1.41 | 0.00 | 0.00 | 0.55 | 0.15 | 29 | AT2 Cell |
| Irx5          | 0.54 | 0.00 | 0.00 | 0.25 | 0.04 | 29 | AT2 Cell |
| Myo5c         | 0.57 | 0.00 | 0.00 | 0.39 | 0.08 | 29 | AT2 Cell |
| Irx1          | 0.61 | 0.00 | 0.00 | 0.30 | 0.05 | 29 | AT2 Cell |
| Dlk1          | 0.65 | 0.00 | 0.00 | 0.37 | 0.07 | 29 | AT2 Cell |
| Ccna2         | 0.57 | 0.00 | 0.00 | 0.26 | 0.04 | 29 | AT2 Cell |
| Hist1h2ae     | 0.97 | 0.00 | 0.00 | 0.41 | 0.09 | 29 | AT2 Cell |
| Kif15         | 0.68 | 0.00 | 0.00 | 0.29 | 0.05 | 29 | AT2 Cell |
| Slc39a8       | 0.57 | 0.00 | 0.00 | 0.38 | 0.07 | 29 | AT2 Cell |
| Mgst1         | 0.75 | 0.00 | 0.00 | 0.66 | 0.20 | 29 | AT2 Cell |
| Cadm1         | 0.63 | 0.00 | 0.00 | 0.54 | 0.14 | 29 | AT2 Cell |
| Cks1b         | 0.78 | 0.00 | 0.00 | 0.41 | 0.10 | 29 | AT2 Cell |
| Tfrc          | 0.57 | 0.00 | 0.00 | 0.31 | 0.06 | 29 | AT2 Cell |
| Tpx2          | 0.63 | 0.00 | 0.00 | 0.30 | 0.06 | 29 | AT2 Cell |
| Cldn3         | 0.55 | 0.00 | 0.00 | 0.49 | 0.12 | 29 | AT2 Cell |
| Mecom         | 0.63 | 0.00 | 0.00 | 0.43 | 0.10 | 29 | AT2 Cell |
| Casc5         | 0.57 | 0.00 | 0.00 | 0.27 | 0.05 | 29 | AT2 Cell |
| Ssx2ip        | 0.56 | 0.00 | 0.00 | 0.26 | 0.04 | 29 | AT2 Cell |
| Ank3          | 0.61 | 0.00 | 0.00 | 0.36 | 0.08 | 29 | AT2 Cell |
| Incenp        | 0.70 | 0.00 | 0.00 | 0.37 | 0.08 | 29 | AT2 Cell |
| Rrm2          | 0.68 | 0.00 | 0.00 | 0.27 | 0.05 | 29 | AT2 Cell |
| Slc12a2       | 0.63 | 0.00 | 0.00 | 0.53 | 0.15 | 29 | AT2 Cell |
| H2afx         | 0.74 | 0.00 | 0.00 | 0.40 | 0.10 | 29 | AT2 Cell |
| Fasn          | 0.61 | 0.00 | 0.00 | 0.35 | 0.08 | 29 | AT2 Cell |
| Fbxo5         | 0.53 | 0.00 | 0.00 | 0.26 | 0.05 | 29 | AT2 Cell |
| Cmtm8         | 0.64 | 0.00 | 0.00 | 0.47 | 0.13 | 29 | AT2 Cell |
| Oat           | 0.65 | 0.00 | 0.00 | 0.47 | 0.13 | 29 | AT2 Cell |
| Mbip          | 0.57 | 0.00 | 0.00 | 0.45 | 0.11 | 29 | AT2 Cell |
| Tacc3         | 0.59 | 0.00 | 0.00 | 0.29 | 0.06 | 29 | AT2 Cell |
| Mt1           | 0.54 | 0.00 | 0.00 | 0.54 | 0.16 | 29 | AT2 Cell |
| 2700094K13Rik | 0.68 | 0.00 | 0.00 | 0.54 | 0.16 | 29 | AT2 Cell |
| Ldhb          | 0.55 | 0.00 | 0.00 | 0.35 | 0.08 | 29 | AT2 Cell |
| Diap3         | 0.62 | 0.00 | 0.00 | 0.30 | 0.06 | 29 | AT2 Cell |
| Atp8a1        | 0.72 | 0.00 | 0.00 | 0.51 | 0.15 | 29 | AT2 Cell |
| Avpi1         | 0.51 | 0.00 | 0.00 | 0.37 | 0.09 | 29 | AT2 Cell |

|            |      |      |      |      |      |    |          |
|------------|------|------|------|------|------|----|----------|
| Snx7       | 0.49 | 0.00 | 0.00 | 0.32 | 0.07 | 29 | AT2 Cell |
| Ppp1r9a    | 0.61 | 0.00 | 0.00 | 0.50 | 0.14 | 29 | AT2 Cell |
| Fgfr2      | 0.67 | 0.00 | 0.00 | 0.32 | 0.07 | 29 | AT2 Cell |
| Snx25      | 0.66 | 0.00 | 0.00 | 0.29 | 0.06 | 29 | AT2 Cell |
| Nucb2      | 0.67 | 0.00 | 0.00 | 0.52 | 0.16 | 29 | AT2 Cell |
| Gclc       | 0.72 | 0.00 | 0.00 | 0.35 | 0.09 | 29 | AT2 Cell |
| Id2        | 0.78 | 0.00 | 0.00 | 0.75 | 0.33 | 29 | AT2 Cell |
| Rab27b     | 0.53 | 0.00 | 0.00 | 0.31 | 0.07 | 29 | AT2 Cell |
| Krt8       | 0.43 | 0.00 | 0.00 | 0.34 | 0.08 | 29 | AT2 Cell |
| Mt2        | 0.39 | 0.00 | 0.00 | 0.31 | 0.07 | 29 | AT2 Cell |
| Hmgb2      | 0.92 | 0.00 | 0.00 | 0.79 | 0.43 | 29 | AT2 Cell |
| Hirip3     | 0.66 | 0.00 | 0.00 | 0.35 | 0.09 | 29 | AT2 Cell |
| Rnase4     | 0.65 | 0.00 | 0.00 | 0.54 | 0.18 | 29 | AT2 Cell |
| Ccdc34     | 0.59 | 0.00 | 0.00 | 0.46 | 0.14 | 29 | AT2 Cell |
| Mid1ip1    | 0.66 | 0.00 | 0.00 | 0.46 | 0.14 | 29 | AT2 Cell |
| Cxadr      | 0.49 | 0.00 | 0.00 | 0.28 | 0.06 | 29 | AT2 Cell |
| Ptplad1    | 0.48 | 0.00 | 0.00 | 0.36 | 0.09 | 29 | AT2 Cell |
| Cebpa      | 0.39 | 0.00 | 0.00 | 0.26 | 0.05 | 29 | AT2 Cell |
| Tcea3      | 0.45 | 0.00 | 0.00 | 0.32 | 0.08 | 29 | AT2 Cell |
| Rai14      | 0.55 | 0.00 | 0.00 | 0.39 | 0.11 | 29 | AT2 Cell |
| Gm10282    | 0.83 | 0.00 | 0.00 | 0.76 | 0.40 | 29 | AT2 Cell |
| Hmgn2      | 0.78 | 0.00 | 0.00 | 0.81 | 0.43 | 29 | AT2 Cell |
| Me1        | 0.61 | 0.00 | 0.00 | 0.25 | 0.06 | 29 | AT2 Cell |
| St6galnac2 | 0.45 | 0.00 | 0.00 | 0.25 | 0.06 | 29 | AT2 Cell |
| Ptgs1      | 0.50 | 0.00 | 0.00 | 0.37 | 0.10 | 29 | AT2 Cell |
| Adk        | 0.45 | 0.00 | 0.00 | 0.40 | 0.12 | 29 | AT2 Cell |
| Gas6       | 0.49 | 0.00 | 0.00 | 0.46 | 0.15 | 29 | AT2 Cell |
| Cenpa      | 0.56 | 0.00 | 0.00 | 0.28 | 0.07 | 29 | AT2 Cell |
| Nucks1     | 0.71 | 0.00 | 0.00 | 0.65 | 0.28 | 29 | AT2 Cell |
| Rangap1    | 0.51 | 0.00 | 0.00 | 0.30 | 0.08 | 29 | AT2 Cell |
| Abcd3      | 0.62 | 0.00 | 0.00 | 0.51 | 0.19 | 29 | AT2 Cell |
| Brd7       | 0.62 | 0.00 | 0.00 | 0.62 | 0.26 | 29 | AT2 Cell |
| Prnp       | 0.53 | 0.00 | 0.00 | 0.39 | 0.12 | 29 | AT2 Cell |
| H2afz      | 0.87 | 0.00 | 0.00 | 0.70 | 0.40 | 29 | AT2 Cell |
| Atad2      | 0.63 | 0.00 | 0.00 | 0.30 | 0.08 | 29 | AT2 Cell |
| Tmpo       | 0.64 | 0.00 | 0.00 | 0.44 | 0.15 | 29 | AT2 Cell |
| Mthfd1     | 0.39 | 0.00 | 0.00 | 0.31 | 0.08 | 29 | AT2 Cell |
| H1f0       | 0.64 | 0.00 | 0.00 | 0.62 | 0.27 | 29 | AT2 Cell |
| Acot7      | 0.46 | 0.00 | 0.00 | 0.26 | 0.06 | 29 | AT2 Cell |
| Wwc1       | 0.44 | 0.00 | 0.00 | 0.26 | 0.06 | 29 | AT2 Cell |
| Zdhhc3     | 0.58 | 0.00 | 0.00 | 0.45 | 0.16 | 29 | AT2 Cell |
| Ptma       | 0.50 | 0.00 | 0.00 | 0.98 | 0.91 | 29 | AT2 Cell |
| Tspan8     | 0.42 | 0.00 | 0.00 | 0.39 | 0.12 | 29 | AT2 Cell |

|           |      |      |      |      |      |    |          |
|-----------|------|------|------|------|------|----|----------|
| AcsI5     | 0.44 | 0.00 | 0.00 | 0.36 | 0.11 | 29 | AT2 Cell |
| Rad21     | 0.59 | 0.00 | 0.00 | 0.56 | 0.23 | 29 | AT2 Cell |
| Atp11a    | 0.55 | 0.00 | 0.00 | 0.36 | 0.11 | 29 | AT2 Cell |
| Smc4      | 0.70 | 0.00 | 0.00 | 0.68 | 0.35 | 29 | AT2 Cell |
| Cat       | 0.46 | 0.00 | 0.00 | 0.39 | 0.12 | 29 | AT2 Cell |
| Dcxr      | 0.33 | 0.00 | 0.00 | 0.36 | 0.11 | 29 | AT2 Cell |
| Neat1     | 0.40 | 0.00 | 0.00 | 0.65 | 0.27 | 29 | AT2 Cell |
| Scd2      | 0.54 | 0.00 | 0.00 | 0.54 | 0.21 | 29 | AT2 Cell |
| Pkp4      | 0.42 | 0.00 | 0.00 | 0.30 | 0.08 | 29 | AT2 Cell |
| Tubb4b    | 0.58 | 0.00 | 0.00 | 0.48 | 0.19 | 29 | AT2 Cell |
| Hmgn1     | 0.57 | 0.00 | 0.00 | 0.80 | 0.45 | 29 | AT2 Cell |
| Cenpq     | 0.31 | 0.00 | 0.00 | 0.26 | 0.07 | 29 | AT2 Cell |
| Taok3     | 0.43 | 0.00 | 0.00 | 0.50 | 0.19 | 29 | AT2 Cell |
| Dbi       | 0.59 | 0.00 | 0.00 | 0.73 | 0.37 | 29 | AT2 Cell |
| Gmnn      | 0.52 | 0.00 | 0.00 | 0.26 | 0.07 | 29 | AT2 Cell |
| Chchd10   | 0.29 | 0.00 | 0.00 | 0.41 | 0.13 | 29 | AT2 Cell |
| Whsc1     | 0.50 | 0.00 | 0.00 | 0.40 | 0.14 | 29 | AT2 Cell |
| Arl6ip1   | 0.87 | 0.00 | 0.00 | 0.83 | 0.52 | 29 | AT2 Cell |
| Serpinb6b | 0.34 | 0.00 | 0.00 | 0.47 | 0.17 | 29 | AT2 Cell |
| Dynll2    | 0.49 | 0.00 | 0.00 | 0.36 | 0.12 | 29 | AT2 Cell |
| Tuba1b    | 0.65 | 0.00 | 0.00 | 0.78 | 0.45 | 29 | AT2 Cell |
| Anxa4     | 0.41 | 0.00 | 0.00 | 0.31 | 0.10 | 29 | AT2 Cell |
| Fkbp2     | 0.53 | 0.00 | 0.00 | 0.46 | 0.18 | 29 | AT2 Cell |
| Scp2      | 0.48 | 0.00 | 0.00 | 0.69 | 0.33 | 29 | AT2 Cell |
| Exosc7    | 0.42 | 0.00 | 0.00 | 0.38 | 0.13 | 29 | AT2 Cell |
| H2afv     | 0.57 | 0.00 | 0.00 | 0.60 | 0.28 | 29 | AT2 Cell |
| Cystm1    | 0.31 | 0.00 | 0.00 | 0.28 | 0.08 | 29 | AT2 Cell |
| Lig1      | 0.51 | 0.00 | 0.00 | 0.30 | 0.10 | 29 | AT2 Cell |
| Chka      | 0.34 | 0.00 | 0.00 | 0.32 | 0.10 | 29 | AT2 Cell |
| Dpp4      | 0.34 | 0.00 | 0.00 | 0.37 | 0.13 | 29 | AT2 Cell |
| Cbx6      | 0.38 | 0.00 | 0.00 | 0.32 | 0.11 | 29 | AT2 Cell |
| Phldb2    | 0.40 | 0.00 | 0.00 | 0.64 | 0.29 | 29 | AT2 Cell |
| Dek       | 0.71 | 0.00 | 0.00 | 0.77 | 0.50 | 29 | AT2 Cell |
| Gja1      | 0.39 | 0.00 | 0.00 | 0.29 | 0.09 | 29 | AT2 Cell |
| Prrg3     | 0.33 | 0.00 | 0.00 | 0.26 | 0.08 | 29 | AT2 Cell |
| Tgoln1    | 0.46 | 0.00 | 0.00 | 0.46 | 0.19 | 29 | AT2 Cell |
| Trim2     | 0.36 | 0.00 | 0.00 | 0.26 | 0.08 | 29 | AT2 Cell |
| Ezh2      | 0.47 | 0.00 | 0.00 | 0.46 | 0.19 | 29 | AT2 Cell |
| Hmga1-rs1 | 0.34 | 0.00 | 0.00 | 0.25 | 0.08 | 29 | AT2 Cell |
| Iah1      | 0.41 | 0.00 | 0.00 | 0.35 | 0.12 | 29 | AT2 Cell |
| Sh3d19    | 0.33 | 0.00 | 0.00 | 0.29 | 0.09 | 29 | AT2 Cell |
| Fkbp4     | 0.53 | 0.00 | 0.00 | 0.39 | 0.15 | 29 | AT2 Cell |
| Uhrf1bp1l | 0.33 | 0.00 | 0.00 | 0.30 | 0.10 | 29 | AT2 Cell |

|            |      |      |      |      |      |    |          |
|------------|------|------|------|------|------|----|----------|
| Apoa1bp    | 0.35 | 0.00 | 0.00 | 0.39 | 0.15 | 29 | AT2 Cell |
| Tubb4b-ps1 | 0.35 | 0.00 | 0.00 | 0.28 | 0.09 | 29 | AT2 Cell |
| Pon3       | 0.35 | 0.00 | 0.00 | 0.30 | 0.10 | 29 | AT2 Cell |
| Pcna       | 0.58 | 0.00 | 0.00 | 0.42 | 0.18 | 29 | AT2 Cell |
| Rnaseh2c   | 0.37 | 0.00 | 0.00 | 0.31 | 0.11 | 29 | AT2 Cell |
| Lmnb1      | 0.34 | 0.00 | 0.00 | 0.27 | 0.09 | 29 | AT2 Cell |
| Hmga1      | 0.32 | 0.00 | 0.00 | 0.25 | 0.08 | 29 | AT2 Cell |
| Dnajc9     | 0.39 | 0.00 | 0.00 | 0.34 | 0.12 | 29 | AT2 Cell |
| Tmem243    | 0.31 | 0.00 | 0.00 | 0.25 | 0.08 | 29 | AT2 Cell |
| Tmem50b    | 0.38 | 0.00 | 0.00 | 0.25 | 0.08 | 29 | AT2 Cell |
| Pcna-ps2   | 0.57 | 0.00 | 0.00 | 0.41 | 0.18 | 29 | AT2 Cell |
| Etfb       | 0.44 | 0.00 | 0.00 | 0.58 | 0.28 | 29 | AT2 Cell |
| Usp1       | 0.46 | 0.00 | 0.00 | 0.38 | 0.16 | 29 | AT2 Cell |
| Krt18      | 0.27 | 0.00 | 0.00 | 0.25 | 0.08 | 29 | AT2 Cell |
| Gde1       | 0.33 | 0.00 | 0.00 | 0.38 | 0.15 | 29 | AT2 Cell |
| Soat1      | 0.32 | 0.00 | 0.00 | 0.30 | 0.11 | 29 | AT2 Cell |
| Iqgap1     | 0.45 | 0.00 | 0.00 | 0.77 | 0.45 | 29 | AT2 Cell |
| Atp13a3    | 0.28 | 0.00 | 0.00 | 0.28 | 0.10 | 29 | AT2 Cell |
| Hist1h1e   | 0.75 | 0.00 | 0.00 | 0.39 | 0.17 | 29 | AT2 Cell |
| Dut        | 0.41 | 0.00 | 0.00 | 0.26 | 0.09 | 29 | AT2 Cell |
| H2afj      | 0.35 | 0.00 | 0.00 | 0.64 | 0.32 | 29 | AT2 Cell |
| Mtch1      | 0.44 | 0.00 | 0.00 | 0.36 | 0.15 | 29 | AT2 Cell |
| Oxct1      | 0.40 | 0.00 | 0.00 | 0.37 | 0.15 | 29 | AT2 Cell |
| Nudc       | 0.33 | 0.00 | 0.00 | 0.47 | 0.21 | 29 | AT2 Cell |
| Gm26924    | 0.64 | 0.00 | 0.00 | 0.84 | 0.57 | 29 | AT2 Cell |
| Ran        | 0.46 | 0.00 | 0.00 | 0.69 | 0.38 | 29 | AT2 Cell |
| Hmgn5      | 0.36 | 0.00 | 0.00 | 0.53 | 0.26 | 29 | AT2 Cell |
| Cd63       | 0.29 | 0.00 | 0.00 | 0.62 | 0.30 | 29 | AT2 Cell |
| Tmem30a    | 0.39 | 0.00 | 0.00 | 0.57 | 0.28 | 29 | AT2 Cell |
| H3f3b      | 0.32 | 0.00 | 0.00 | 0.99 | 0.89 | 29 | AT2 Cell |
| Ckap5      | 0.37 | 0.00 | 0.00 | 0.30 | 0.12 | 29 | AT2 Cell |
| Cpne3      | 0.41 | 0.00 | 0.00 | 0.41 | 0.18 | 29 | AT2 Cell |
| Sae1       | 0.28 | 0.00 | 0.00 | 0.30 | 0.11 | 29 | AT2 Cell |
| Arfip1     | 0.30 | 0.00 | 0.00 | 0.32 | 0.13 | 29 | AT2 Cell |
| Nckap5     | 0.29 | 0.00 | 0.00 | 0.33 | 0.13 | 29 | AT2 Cell |
| Mettl7a1   | 0.28 | 0.00 | 0.00 | 0.48 | 0.22 | 29 | AT2 Cell |
| Siva1      | 0.42 | 0.00 | 0.00 | 0.35 | 0.15 | 29 | AT2 Cell |
| Anp32b     | 0.41 | 0.00 | 0.00 | 0.81 | 0.50 | 29 | AT2 Cell |
| Syne2      | 0.32 | 0.00 | 0.00 | 0.35 | 0.14 | 29 | AT2 Cell |
| Itga9      | 0.30 | 0.00 | 0.00 | 0.26 | 0.10 | 29 | AT2 Cell |
| Cbx5       | 0.31 | 0.00 | 0.00 | 0.53 | 0.26 | 29 | AT2 Cell |
| Ndufc2     | 0.34 | 0.00 | 0.00 | 0.70 | 0.39 | 29 | AT2 Cell |
| Azin1      | 0.27 | 0.00 | 0.00 | 0.33 | 0.13 | 29 | AT2 Cell |

|               |      |      |      |      |      |    |          |
|---------------|------|------|------|------|------|----|----------|
| Dstn          | 0.38 | 0.00 | 0.00 | 0.79 | 0.51 | 29 | AT2 Cell |
| Prdx4         | 0.31 | 0.00 | 0.00 | 0.37 | 0.16 | 29 | AT2 Cell |
| Baz1b         | 0.26 | 0.00 | 0.00 | 0.54 | 0.27 | 29 | AT2 Cell |
| Cited2        | 0.31 | 0.00 | 0.00 | 0.27 | 0.10 | 29 | AT2 Cell |
| Nfix          | 0.27 | 0.00 | 0.00 | 0.39 | 0.17 | 29 | AT2 Cell |
| Gm6104        | 0.30 | 0.00 | 0.00 | 0.31 | 0.13 | 29 | AT2 Cell |
| Enpep         | 0.29 | 0.00 | 0.00 | 0.27 | 0.10 | 29 | AT2 Cell |
| Wls           | 0.30 | 0.00 | 0.00 | 0.47 | 0.23 | 29 | AT2 Cell |
| Hist1h1d      | 0.51 | 0.00 | 0.00 | 0.26 | 0.10 | 29 | AT2 Cell |
| Atp2a2        | 0.33 | 0.00 | 0.00 | 0.31 | 0.13 | 29 | AT2 Cell |
| Tmem245       | 0.29 | 0.00 | 0.00 | 0.26 | 0.10 | 29 | AT2 Cell |
| Anapc13       | 0.31 | 0.00 | 0.00 | 0.45 | 0.21 | 29 | AT2 Cell |
| Bsg           | 0.33 | 0.00 | 0.00 | 0.63 | 0.36 | 29 | AT2 Cell |
| Hdgf          | 0.31 | 0.00 | 0.00 | 0.50 | 0.25 | 29 | AT2 Cell |
| Hmgb3         | 0.32 | 0.00 | 0.00 | 0.34 | 0.15 | 29 | AT2 Cell |
| Fam111a       | 0.27 | 0.00 | 0.00 | 0.35 | 0.15 | 29 | AT2 Cell |
| Hjrp          | 0.29 | 0.00 | 0.00 | 0.34 | 0.15 | 29 | AT2 Cell |
| Tspo          | 0.26 | 0.00 | 0.00 | 0.51 | 0.26 | 29 | AT2 Cell |
| Suz12         | 0.26 | 0.00 | 0.00 | 0.31 | 0.13 | 29 | AT2 Cell |
| Nmt2          | 0.31 | 0.00 | 0.00 | 0.26 | 0.10 | 29 | AT2 Cell |
| Emb           | 0.25 | 0.00 | 0.00 | 0.28 | 0.11 | 29 | AT2 Cell |
| Ctnnb1        | 0.29 | 0.00 | 0.00 | 0.63 | 0.35 | 29 | AT2 Cell |
| Sod1          | 0.31 | 0.00 | 0.00 | 0.75 | 0.47 | 29 | AT2 Cell |
| Hsp90aa1      | 0.27 | 0.00 | 0.00 | 0.75 | 0.48 | 29 | AT2 Cell |
| Cep57         | 0.31 | 0.00 | 0.00 | 0.27 | 0.11 | 29 | AT2 Cell |
| Tuba1c        | 0.41 | 0.00 | 0.00 | 0.57 | 0.32 | 29 | AT2 Cell |
| Stard3nl      | 0.29 | 0.00 | 0.00 | 0.28 | 0.12 | 29 | AT2 Cell |
| Tubb5         | 0.43 | 0.00 | 0.00 | 0.70 | 0.44 | 29 | AT2 Cell |
| Tmbim6        | 0.26 | 0.00 | 0.00 | 0.67 | 0.38 | 29 | AT2 Cell |
| Usp33         | 0.32 | 0.00 | 0.00 | 0.27 | 0.11 | 29 | AT2 Cell |
| Dapk1         | 0.25 | 0.00 | 0.00 | 0.27 | 0.11 | 29 | AT2 Cell |
| Gm9790        | 0.34 | 0.00 | 0.00 | 0.36 | 0.17 | 29 | AT2 Cell |
| 1810037l17Rik | 0.32 | 0.00 | 0.00 | 0.58 | 0.32 | 29 | AT2 Cell |
| Smchd1        | 0.30 | 0.00 | 0.00 | 0.35 | 0.16 | 29 | AT2 Cell |
| Pigyl         | 0.30 | 0.00 | 0.00 | 0.25 | 0.11 | 29 | AT2 Cell |
| Txn1          | 0.31 | 0.00 | 0.00 | 0.78 | 0.50 | 29 | AT2 Cell |
| Idh2          | 0.26 | 0.00 | 0.00 | 0.40 | 0.19 | 29 | AT2 Cell |
| Ckap4         | 0.25 | 0.00 | 0.00 | 0.37 | 0.18 | 29 | AT2 Cell |
| Mrpl14        | 0.30 | 0.00 | 0.00 | 0.33 | 0.15 | 29 | AT2 Cell |
| Vamp8         | 0.26 | 0.00 | 0.00 | 0.62 | 0.35 | 29 | AT2 Cell |
| Atp5e         | 0.29 | 0.00 | 0.00 | 0.79 | 0.50 | 29 | AT2 Cell |
| Arf6          | 0.26 | 0.00 | 0.00 | 0.39 | 0.19 | 29 | AT2 Cell |
| Bub3          | 0.29 | 0.00 | 0.00 | 0.31 | 0.14 | 29 | AT2 Cell |

|               |      |      |      |      |      |    |               |
|---------------|------|------|------|------|------|----|---------------|
| Pfdn1         | 0.28 | 0.00 | 0.00 | 0.48 | 0.26 | 29 | AT2 Cell      |
| Dtymk         | 0.31 | 0.00 | 0.00 | 0.30 | 0.14 | 29 | AT2 Cell      |
| Slbp          | 0.33 | 0.00 | 0.00 | 0.31 | 0.15 | 29 | AT2 Cell      |
| Bag1          | 0.34 | 0.00 | 0.00 | 0.44 | 0.24 | 29 | AT2 Cell      |
| Dmtf1         | 0.26 | 0.00 | 0.00 | 0.26 | 0.11 | 29 | AT2 Cell      |
| Atxn10        | 0.27 | 0.00 | 0.00 | 0.39 | 0.19 | 29 | AT2 Cell      |
| Usp47         | 0.30 | 0.00 | 0.00 | 0.27 | 0.12 | 29 | AT2 Cell      |
| Prdx1         | 0.29 | 0.00 | 0.00 | 0.74 | 0.50 | 29 | AT2 Cell      |
| Tead1         | 0.30 | 0.00 | 0.00 | 0.29 | 0.14 | 29 | AT2 Cell      |
| Gm5641        | 0.30 | 0.00 | 0.00 | 0.60 | 0.37 | 29 | AT2 Cell      |
| Lrrcc1        | 0.25 | 0.00 | 0.00 | 0.26 | 0.12 | 29 | AT2 Cell      |
| Ssrp1         | 0.28 | 0.00 | 0.00 | 0.40 | 0.21 | 29 | AT2 Cell      |
| Calm2         | 0.33 | 0.00 | 0.00 | 0.85 | 0.64 | 29 | AT2 Cell      |
| Larp7         | 0.26 | 0.00 | 0.00 | 0.34 | 0.17 | 29 | AT2 Cell      |
| Rif1          | 0.28 | 0.00 | 0.00 | 0.32 | 0.17 | 29 | AT2 Cell      |
| Mrpl52        | 0.25 | 0.00 | 0.00 | 0.54 | 0.33 | 29 | AT2 Cell      |
| Ranbp1        | 0.29 | 0.00 | 0.00 | 0.49 | 0.29 | 29 | AT2 Cell      |
| Hnrnpab       | 0.27 | 0.00 | 0.01 | 0.53 | 0.33 | 29 | AT2 Cell      |
| Higd1a        | 0.25 | 0.00 | 0.01 | 0.34 | 0.18 | 29 | AT2 Cell      |
| Pcnt          | 0.29 | 0.00 | 0.01 | 0.28 | 0.14 | 29 | AT2 Cell      |
| H2afy         | 0.26 | 0.00 | 0.02 | 0.36 | 0.20 | 29 | AT2 Cell      |
| Mfap4         | 1.08 | 0.00 | 0.00 | 0.94 | 0.25 | 30 | Myofibroblast |
| Tcf21         | 0.88 | 0.00 | 0.00 | 0.82 | 0.17 | 30 | Myofibroblast |
| Dpt           | 1.06 | 0.00 | 0.00 | 0.72 | 0.18 | 30 | Myofibroblast |
| Adh1          | 0.94 | 0.00 | 0.00 | 0.71 | 0.17 | 30 | Myofibroblast |
| Adamts17      | 0.66 | 0.00 | 0.00 | 0.30 | 0.04 | 30 | Myofibroblast |
| Maf           | 0.88 | 0.00 | 0.00 | 0.74 | 0.19 | 30 | Myofibroblast |
| Cp            | 0.90 | 0.00 | 0.00 | 0.58 | 0.13 | 30 | Myofibroblast |
| Ogn           | 0.79 | 0.00 | 0.00 | 0.60 | 0.13 | 30 | Myofibroblast |
| Limch1        | 0.88 | 0.00 | 0.00 | 0.89 | 0.31 | 30 | Myofibroblast |
| Col13a1       | 0.76 | 0.00 | 0.00 | 0.49 | 0.10 | 30 | Myofibroblast |
| Meox2         | 0.74 | 0.00 | 0.00 | 0.42 | 0.08 | 30 | Myofibroblast |
| G0s2          | 0.79 | 0.00 | 0.00 | 0.57 | 0.13 | 30 | Myofibroblast |
| Cdh11         | 0.80 | 0.00 | 0.00 | 0.70 | 0.19 | 30 | Myofibroblast |
| Macf1         | 0.96 | 0.00 | 0.00 | 0.98 | 0.52 | 30 | Myofibroblast |
| Fhl1          | 0.79 | 0.00 | 0.00 | 0.85 | 0.29 | 30 | Myofibroblast |
| Fn1           | 0.84 | 0.00 | 0.00 | 0.76 | 0.23 | 30 | Myofibroblast |
| Rbp1          | 0.81 | 0.00 | 0.00 | 0.68 | 0.20 | 30 | Myofibroblast |
| Fmo2          | 0.96 | 0.00 | 0.00 | 0.61 | 0.17 | 30 | Myofibroblast |
| Lbh           | 0.66 | 0.00 | 0.00 | 0.68 | 0.19 | 30 | Myofibroblast |
| Akap12        | 0.90 | 0.00 | 0.00 | 0.73 | 0.24 | 30 | Myofibroblast |
| Gyg           | 0.74 | 0.00 | 0.00 | 0.65 | 0.19 | 30 | Myofibroblast |
| 6030408B16Rik | 0.71 | 0.00 | 0.00 | 0.28 | 0.05 | 30 | Myofibroblast |

|          |       |      |      |      |      |      |    |               |
|----------|-------|------|------|------|------|------|----|---------------|
| Pcolce2  |       | 0.59 | 0.00 | 0.00 | 0.42 | 0.09 | 30 | Myofibroblast |
| Ablim3   |       | 0.53 | 0.00 | 0.00 | 0.29 | 0.05 | 30 | Myofibroblast |
| Lyve1    |       | 1.05 | 0.00 | 0.00 | 0.68 | 0.22 | 30 | Myofibroblast |
| Mgp      |       | 0.55 | 0.00 | 0.00 | 0.88 | 0.32 | 30 | Myofibroblast |
| Ptprd    |       | 0.78 | 0.00 | 0.00 | 0.47 | 0.12 | 30 | Myofibroblast |
| Npnt     |       | 0.81 | 0.00 | 0.00 | 0.72 | 0.24 | 30 | Myofibroblast |
| Figf     |       | 0.50 | 0.00 | 0.00 | 0.35 | 0.07 | 30 | Myofibroblast |
| Nebl     |       | 0.69 | 0.00 | 0.00 | 0.43 | 0.10 | 30 | Myofibroblast |
|          | 4-Sep | 0.65 | 0.00 | 0.00 | 0.71 | 0.23 | 30 | Myofibroblast |
| Ramp2    |       | 0.65 | 0.00 | 0.00 | 0.80 | 0.28 | 30 | Myofibroblast |
| Plac9b   |       | 0.67 | 0.00 | 0.00 | 0.81 | 0.30 | 30 | Myofibroblast |
| Inmt     |       | 0.63 | 0.00 | 0.00 | 0.29 | 0.06 | 30 | Myofibroblast |
| Clec3b   |       | 0.53 | 0.00 | 0.00 | 0.33 | 0.07 | 30 | Myofibroblast |
| Spon1    |       | 0.57 | 0.00 | 0.00 | 0.33 | 0.07 | 30 | Myofibroblast |
| Gpihbp1  |       | 0.62 | 0.00 | 0.00 | 0.56 | 0.16 | 30 | Myofibroblast |
| Calcr1   |       | 0.50 | 0.00 | 0.00 | 0.75 | 0.25 | 30 | Myofibroblast |
| Slc38a5  |       | 0.58 | 0.00 | 0.00 | 0.29 | 0.06 | 30 | Myofibroblast |
| Plac9a   |       | 0.62 | 0.00 | 0.00 | 0.79 | 0.30 | 30 | Myofibroblast |
| Col1a2   |       | 0.49 | 0.00 | 0.00 | 0.93 | 0.39 | 30 | Myofibroblast |
| Fgf7     |       | 0.52 | 0.00 | 0.00 | 0.26 | 0.05 | 30 | Myofibroblast |
| Enpep    |       | 0.61 | 0.00 | 0.00 | 0.40 | 0.10 | 30 | Myofibroblast |
| Tmem100  |       | 0.43 | 0.00 | 0.00 | 0.82 | 0.30 | 30 | Myofibroblast |
| Cldn5    |       | 0.58 | 0.00 | 0.00 | 0.67 | 0.22 | 30 | Myofibroblast |
| Gsn      |       | 0.64 | 0.00 | 0.00 | 0.67 | 0.25 | 30 | Myofibroblast |
| Rap2a    |       | 0.69 | 0.00 | 0.00 | 0.51 | 0.16 | 30 | Myofibroblast |
| Nr2f2    |       | 0.62 | 0.00 | 0.00 | 0.62 | 0.21 | 30 | Myofibroblast |
| Serping1 |       | 0.48 | 0.00 | 0.00 | 0.46 | 0.12 | 30 | Myofibroblast |
| Cped1    |       | 0.57 | 0.00 | 0.00 | 0.38 | 0.10 | 30 | Myofibroblast |
| Myh10    |       | 0.61 | 0.00 | 0.00 | 0.65 | 0.23 | 30 | Myofibroblast |
| Epas1    |       | 0.57 | 0.00 | 0.00 | 0.70 | 0.25 | 30 | Myofibroblast |
| Gpx3     |       | 0.66 | 0.00 | 0.00 | 0.47 | 0.14 | 30 | Myofibroblast |
| Ifitm1   |       | 0.45 | 0.00 | 0.00 | 0.48 | 0.14 | 30 | Myofibroblast |
| Egfl7    |       | 0.40 | 0.00 | 0.00 | 0.78 | 0.28 | 30 | Myofibroblast |
| Atp1a2   |       | 0.55 | 0.00 | 0.00 | 0.38 | 0.10 | 30 | Myofibroblast |
| Fblim1   |       | 0.65 | 0.00 | 0.00 | 0.51 | 0.16 | 30 | Myofibroblast |
| Acvrl1   |       | 0.50 | 0.00 | 0.00 | 0.55 | 0.18 | 30 | Myofibroblast |
| Scn7a    |       | 0.48 | 0.00 | 0.00 | 0.73 | 0.30 | 30 | Myofibroblast |
| Plxdc2   |       | 0.71 | 0.00 | 0.00 | 0.42 | 0.13 | 30 | Myofibroblast |
| Sema6a   |       | 0.53 | 0.00 | 0.00 | 0.41 | 0.12 | 30 | Myofibroblast |
| Ednra    |       | 0.48 | 0.00 | 0.00 | 0.34 | 0.09 | 30 | Myofibroblast |
| Col1a1   |       | 0.41 | 0.00 | 0.00 | 0.70 | 0.26 | 30 | Myofibroblast |
| Ptpnb    |       | 0.48 | 0.00 | 0.00 | 0.62 | 0.22 | 30 | Myofibroblast |
| Sh3bgrl  |       | 0.65 | 0.00 | 0.00 | 0.84 | 0.45 | 30 | Myofibroblast |

|          |      |      |      |      |      |    |               |
|----------|------|------|------|------|------|----|---------------|
| Sned1    | 0.46 | 0.00 | 0.00 | 0.26 | 0.06 | 30 | Myofibroblast |
| Ly6a     | 0.55 | 0.00 | 0.00 | 0.57 | 0.19 | 30 | Myofibroblast |
| Cd93     | 0.44 | 0.00 | 0.00 | 0.63 | 0.22 | 30 | Myofibroblast |
| Thbd     | 0.62 | 0.00 | 0.00 | 0.64 | 0.25 | 30 | Myofibroblast |
| Tns1     | 0.54 | 0.00 | 0.00 | 0.62 | 0.23 | 30 | Myofibroblast |
| Eva1b    | 0.58 | 0.00 | 0.00 | 0.55 | 0.20 | 30 | Myofibroblast |
| Hip1     | 0.62 | 0.00 | 0.00 | 0.48 | 0.16 | 30 | Myofibroblast |
| Slit2    | 0.59 | 0.00 | 0.00 | 0.30 | 0.08 | 30 | Myofibroblast |
| Gpc3     | 0.58 | 0.00 | 0.00 | 0.49 | 0.17 | 30 | Myofibroblast |
| Ppap2b   | 0.65 | 0.00 | 0.00 | 0.62 | 0.24 | 30 | Myofibroblast |
| Hsd11b1  | 0.44 | 0.00 | 0.00 | 0.34 | 0.09 | 30 | Myofibroblast |
| Tspan7   | 0.51 | 0.00 | 0.00 | 0.59 | 0.22 | 30 | Myofibroblast |
| Dpep1    | 0.60 | 0.00 | 0.00 | 0.27 | 0.07 | 30 | Myofibroblast |
| Peg3     | 0.76 | 0.00 | 0.00 | 0.68 | 0.30 | 30 | Myofibroblast |
| Pecam1   | 0.31 | 0.00 | 0.00 | 0.67 | 0.24 | 30 | Myofibroblast |
| Sparcl1  | 0.47 | 0.00 | 0.00 | 0.82 | 0.39 | 30 | Myofibroblast |
| Mylk     | 0.52 | 0.00 | 0.00 | 0.67 | 0.27 | 30 | Myofibroblast |
| Kitl     | 0.48 | 0.00 | 0.00 | 0.58 | 0.23 | 30 | Myofibroblast |
| Colec12  | 0.39 | 0.00 | 0.00 | 0.36 | 0.10 | 30 | Myofibroblast |
| Clec1a   | 0.51 | 0.00 | 0.00 | 0.49 | 0.17 | 30 | Myofibroblast |
| Bgn      | 0.43 | 0.00 | 0.00 | 0.64 | 0.24 | 30 | Myofibroblast |
| BC028528 | 0.42 | 0.00 | 0.00 | 0.70 | 0.29 | 30 | Myofibroblast |
| Tspan13  | 0.36 | 0.00 | 0.00 | 0.64 | 0.25 | 30 | Myofibroblast |
| Gng11    | 0.47 | 0.00 | 0.00 | 0.69 | 0.29 | 30 | Myofibroblast |
| Slc29a1  | 0.41 | 0.00 | 0.00 | 0.30 | 0.08 | 30 | Myofibroblast |
| Nexn     | 0.41 | 0.00 | 0.00 | 0.57 | 0.22 | 30 | Myofibroblast |
| Adamts1  | 0.67 | 0.00 | 0.00 | 0.55 | 0.21 | 30 | Myofibroblast |
| Vcan     | 0.62 | 0.00 | 0.00 | 0.35 | 0.11 | 30 | Myofibroblast |
| Igfbp4   | 0.65 | 0.00 | 0.00 | 0.61 | 0.25 | 30 | Myofibroblast |
| Palld    | 0.47 | 0.00 | 0.00 | 0.49 | 0.18 | 30 | Myofibroblast |
| Scn3b    | 0.55 | 0.00 | 0.00 | 0.28 | 0.08 | 30 | Myofibroblast |
| Serpine2 | 0.41 | 0.00 | 0.00 | 0.62 | 0.26 | 30 | Myofibroblast |
| Ppap2a   | 0.40 | 0.00 | 0.00 | 0.52 | 0.19 | 30 | Myofibroblast |
| Agpat4   | 0.54 | 0.00 | 0.00 | 0.39 | 0.13 | 30 | Myofibroblast |
| Fgfr1    | 0.45 | 0.00 | 0.00 | 0.34 | 0.11 | 30 | Myofibroblast |
| Ace      | 0.44 | 0.00 | 0.00 | 0.40 | 0.14 | 30 | Myofibroblast |
| Tbx2     | 0.49 | 0.00 | 0.00 | 0.36 | 0.12 | 30 | Myofibroblast |
| Foxf1    | 0.44 | 0.00 | 0.00 | 0.37 | 0.12 | 30 | Myofibroblast |
| Eltld1   | 0.37 | 0.00 | 0.00 | 0.26 | 0.07 | 30 | Myofibroblast |
| Phlda1   | 0.49 | 0.00 | 0.00 | 0.52 | 0.21 | 30 | Myofibroblast |
| Pmp22    | 0.39 | 0.00 | 0.00 | 0.69 | 0.32 | 30 | Myofibroblast |
| Gimap5   | 0.49 | 0.00 | 0.00 | 0.35 | 0.12 | 30 | Myofibroblast |
| Meis2    | 0.47 | 0.00 | 0.00 | 0.36 | 0.12 | 30 | Myofibroblast |

|               |      |      |      |      |      |    |               |
|---------------|------|------|------|------|------|----|---------------|
| Heg1          | 0.38 | 0.00 | 0.00 | 0.44 | 0.16 | 30 | Myofibroblast |
| Selenbp1      | 0.38 | 0.00 | 0.00 | 0.56 | 0.23 | 30 | Myofibroblast |
| S100a16       | 0.33 | 0.00 | 0.00 | 0.59 | 0.24 | 30 | Myofibroblast |
| Ehd4          | 0.42 | 0.00 | 0.00 | 0.63 | 0.28 | 30 | Myofibroblast |
| Pcdh17        | 0.41 | 0.00 | 0.00 | 0.53 | 0.21 | 30 | Myofibroblast |
| Itga8         | 0.56 | 0.00 | 0.00 | 0.30 | 0.09 | 30 | Myofibroblast |
| Hivep3        | 0.44 | 0.00 | 0.00 | 0.26 | 0.08 | 30 | Myofibroblast |
| 1810011O10Rik | 0.34 | 0.00 | 0.00 | 0.28 | 0.08 | 30 | Myofibroblast |
| Emilin1       | 0.41 | 0.00 | 0.00 | 0.30 | 0.09 | 30 | Myofibroblast |
| Rgs12         | 0.35 | 0.00 | 0.00 | 0.36 | 0.12 | 30 | Myofibroblast |
| Slc9a3r2      | 0.41 | 0.00 | 0.00 | 0.52 | 0.21 | 30 | Myofibroblast |
| Nfib          | 0.48 | 0.00 | 0.00 | 0.82 | 0.47 | 30 | Myofibroblast |
| Nid1          | 0.49 | 0.00 | 0.00 | 0.55 | 0.23 | 30 | Myofibroblast |
| Cxx1b         | 0.51 | 0.00 | 0.00 | 0.53 | 0.22 | 30 | Myofibroblast |
| Ppp1r14a      | 0.32 | 0.00 | 0.00 | 0.28 | 0.08 | 30 | Myofibroblast |
| Aqp1          | 0.32 | 0.00 | 0.00 | 0.51 | 0.20 | 30 | Myofibroblast |
| Prex2         | 0.43 | 0.00 | 0.00 | 0.48 | 0.19 | 30 | Myofibroblast |
| Ednrb         | 0.58 | 0.00 | 0.00 | 0.40 | 0.15 | 30 | Myofibroblast |
| Mxra8         | 0.46 | 0.00 | 0.00 | 0.43 | 0.17 | 30 | Myofibroblast |
| Mmp2          | 0.48 | 0.00 | 0.00 | 0.38 | 0.14 | 30 | Myofibroblast |
| Olfml3        | 0.44 | 0.00 | 0.00 | 0.28 | 0.09 | 30 | Myofibroblast |
| S1pr1         | 0.39 | 0.00 | 0.00 | 0.49 | 0.19 | 30 | Myofibroblast |
| Id1           | 0.39 | 0.00 | 0.00 | 0.56 | 0.24 | 30 | Myofibroblast |
| Emcn          | 0.27 | 0.00 | 0.00 | 0.34 | 0.11 | 30 | Myofibroblast |
| Cd200         | 0.46 | 0.00 | 0.00 | 0.60 | 0.27 | 30 | Myofibroblast |
| Ldb2          | 0.44 | 0.00 | 0.00 | 0.43 | 0.17 | 30 | Myofibroblast |
| Kank3         | 0.28 | 0.00 | 0.00 | 0.40 | 0.14 | 30 | Myofibroblast |
| Ripply3       | 0.38 | 0.00 | 0.00 | 0.37 | 0.13 | 30 | Myofibroblast |
| Tcf4          | 0.52 | 0.00 | 0.00 | 0.74 | 0.41 | 30 | Myofibroblast |
| Cxx1c         | 0.57 | 0.00 | 0.00 | 0.51 | 0.22 | 30 | Myofibroblast |
| Tie1          | 0.37 | 0.00 | 0.00 | 0.34 | 0.12 | 30 | Myofibroblast |
| Hspb1         | 0.49 | 0.00 | 0.00 | 0.37 | 0.14 | 30 | Myofibroblast |
| Csrp1         | 0.43 | 0.00 | 0.00 | 0.42 | 0.17 | 30 | Myofibroblast |
| Isoc1         | 0.49 | 0.00 | 0.00 | 0.26 | 0.08 | 30 | Myofibroblast |
| Emp1          | 0.35 | 0.00 | 0.00 | 0.54 | 0.22 | 30 | Myofibroblast |
| Gpr116        | 0.28 | 0.00 | 0.00 | 0.77 | 0.38 | 30 | Myofibroblast |
| Ccdc80        | 0.28 | 0.00 | 0.00 | 0.34 | 0.12 | 30 | Myofibroblast |
| Ism1          | 0.45 | 0.00 | 0.00 | 0.28 | 0.09 | 30 | Myofibroblast |
| Cdc42ep1      | 0.49 | 0.00 | 0.00 | 0.26 | 0.08 | 30 | Myofibroblast |
| Igfbp7        | 0.43 | 0.00 | 0.00 | 0.73 | 0.39 | 30 | Myofibroblast |
| Col4a1        | 0.38 | 0.00 | 0.00 | 0.83 | 0.50 | 30 | Myofibroblast |
| Marcks        | 0.37 | 0.00 | 0.00 | 0.84 | 0.50 | 30 | Myofibroblast |
| Tmem204       | 0.44 | 0.00 | 0.00 | 0.40 | 0.16 | 30 | Myofibroblast |

|               |      |      |      |      |      |    |               |
|---------------|------|------|------|------|------|----|---------------|
| Mest          | 0.28 | 0.00 | 0.00 | 0.50 | 0.20 | 30 | Myofibroblast |
| Ecscr         | 0.28 | 0.00 | 0.00 | 0.44 | 0.17 | 30 | Myofibroblast |
| Gata2         | 0.31 | 0.00 | 0.00 | 0.38 | 0.14 | 30 | Myofibroblast |
| Tmem88        | 0.29 | 0.00 | 0.00 | 0.32 | 0.11 | 30 | Myofibroblast |
| C230081A13Rik | 0.36 | 0.00 | 0.00 | 0.30 | 0.10 | 30 | Myofibroblast |
| Ctsl          | 0.37 | 0.00 | 0.00 | 0.75 | 0.39 | 30 | Myofibroblast |
| Rnf144a       | 0.31 | 0.00 | 0.00 | 0.41 | 0.16 | 30 | Myofibroblast |
| Ppp1r16b      | 0.31 | 0.00 | 0.00 | 0.29 | 0.10 | 30 | Myofibroblast |
| Ly6c1         | 0.37 | 0.00 | 0.00 | 0.47 | 0.19 | 30 | Myofibroblast |
| Slc43a3       | 0.45 | 0.00 | 0.00 | 0.51 | 0.22 | 30 | Myofibroblast |
| Fendrr        | 0.27 | 0.00 | 0.00 | 0.50 | 0.20 | 30 | Myofibroblast |
| Cav2          | 0.33 | 0.00 | 0.00 | 0.48 | 0.19 | 30 | Myofibroblast |
| Adarb1        | 0.37 | 0.00 | 0.00 | 0.25 | 0.08 | 30 | Myofibroblast |
| Cpm           | 0.55 | 0.00 | 0.00 | 0.43 | 0.18 | 30 | Myofibroblast |
| Myzap         | 0.41 | 0.00 | 0.00 | 0.38 | 0.15 | 30 | Myofibroblast |
| Esam          | 0.39 | 0.00 | 0.00 | 0.44 | 0.18 | 30 | Myofibroblast |
| Mcam          | 0.41 | 0.00 | 0.00 | 0.35 | 0.13 | 30 | Myofibroblast |
| Ext1          | 0.45 | 0.00 | 0.00 | 0.25 | 0.08 | 30 | Myofibroblast |
| Car4          | 0.42 | 0.00 | 0.00 | 0.25 | 0.08 | 30 | Myofibroblast |
| Specc1l       | 0.40 | 0.00 | 0.00 | 0.33 | 0.12 | 30 | Myofibroblast |
| Cd34          | 0.38 | 0.00 | 0.00 | 0.48 | 0.20 | 30 | Myofibroblast |
| Nrep          | 0.49 | 0.00 | 0.00 | 0.73 | 0.43 | 30 | Myofibroblast |
| Mpv17         | 0.33 | 0.00 | 0.00 | 0.28 | 0.10 | 30 | Myofibroblast |
| Rasgrp3       | 0.48 | 0.00 | 0.00 | 0.34 | 0.13 | 30 | Myofibroblast |
| Btbd3         | 0.44 | 0.00 | 0.00 | 0.37 | 0.15 | 30 | Myofibroblast |
| Kit           | 0.29 | 0.00 | 0.00 | 0.26 | 0.08 | 30 | Myofibroblast |
| Sdpr          | 0.35 | 0.00 | 0.00 | 0.85 | 0.52 | 30 | Myofibroblast |
| Igf2r         | 0.42 | 0.00 | 0.00 | 0.30 | 0.11 | 30 | Myofibroblast |
| Plcb4         | 0.32 | 0.00 | 0.00 | 0.37 | 0.14 | 30 | Myofibroblast |
| Myo6          | 0.32 | 0.00 | 0.00 | 0.36 | 0.14 | 30 | Myofibroblast |
| Mfap2         | 0.36 | 0.00 | 0.00 | 0.71 | 0.35 | 30 | Myofibroblast |
| Tmem47        | 0.29 | 0.00 | 0.00 | 0.29 | 0.10 | 30 | Myofibroblast |
| Ccnd1         | 0.45 | 0.00 | 0.00 | 0.44 | 0.19 | 30 | Myofibroblast |
| Snai2         | 0.37 | 0.00 | 0.00 | 0.33 | 0.12 | 30 | Myofibroblast |
| Pltp          | 0.46 | 0.00 | 0.00 | 0.42 | 0.18 | 30 | Myofibroblast |
| Ivd           | 0.36 | 0.00 | 0.00 | 0.26 | 0.09 | 30 | Myofibroblast |
| Plk2          | 0.47 | 0.00 | 0.00 | 0.39 | 0.16 | 30 | Myofibroblast |
| Lama4         | 0.47 | 0.00 | 0.00 | 0.34 | 0.13 | 30 | Myofibroblast |
| Klf2          | 0.33 | 0.00 | 0.00 | 0.47 | 0.20 | 30 | Myofibroblast |
| Npr3          | 0.47 | 0.00 | 0.00 | 0.33 | 0.13 | 30 | Myofibroblast |
| Klf4          | 0.38 | 0.00 | 0.00 | 0.51 | 0.24 | 30 | Myofibroblast |
| Prx           | 0.33 | 0.00 | 0.00 | 0.29 | 0.11 | 30 | Myofibroblast |
| Fas           | 0.26 | 0.00 | 0.00 | 0.28 | 0.10 | 30 | Myofibroblast |

|               |      |      |      |      |      |    |               |
|---------------|------|------|------|------|------|----|---------------|
| Clec14a       | 0.36 | 0.00 | 0.00 | 0.42 | 0.18 | 30 | Myofibroblast |
| Col6a2        | 0.32 | 0.00 | 0.00 | 0.37 | 0.15 | 30 | Myofibroblast |
| Cxx1a         | 0.50 | 0.00 | 0.00 | 0.48 | 0.22 | 30 | Myofibroblast |
| Col4a2        | 0.32 | 0.00 | 0.00 | 0.76 | 0.43 | 30 | Myofibroblast |
| Ptrf          | 0.37 | 0.00 | 0.00 | 0.65 | 0.35 | 30 | Myofibroblast |
| Nfia          | 0.40 | 0.00 | 0.00 | 0.51 | 0.24 | 30 | Myofibroblast |
| Tns3          | 0.43 | 0.00 | 0.00 | 0.29 | 0.11 | 30 | Myofibroblast |
| Gstm1         | 0.40 | 0.00 | 0.00 | 0.36 | 0.15 | 30 | Myofibroblast |
| Pcolce        | 0.31 | 0.00 | 0.00 | 0.25 | 0.09 | 30 | Myofibroblast |
| Plcg1         | 0.35 | 0.00 | 0.00 | 0.38 | 0.16 | 30 | Myofibroblast |
| Ifitm2        | 0.40 | 0.00 | 0.00 | 0.60 | 0.32 | 30 | Myofibroblast |
| Fxyd1         | 0.31 | 0.00 | 0.00 | 0.26 | 0.09 | 30 | Myofibroblast |
| 9430020K01Rik | 0.26 | 0.00 | 0.00 | 0.33 | 0.13 | 30 | Myofibroblast |
| Lpl           | 0.35 | 0.00 | 0.00 | 0.35 | 0.15 | 30 | Myofibroblast |
| Nrp1          | 0.36 | 0.00 | 0.00 | 0.70 | 0.39 | 30 | Myofibroblast |
| Xist          | 0.39 | 0.00 | 0.00 | 0.79 | 0.51 | 30 | Myofibroblast |
| Smarca2       | 0.36 | 0.00 | 0.00 | 0.63 | 0.35 | 30 | Myofibroblast |
| Mdk           | 0.33 | 0.00 | 0.00 | 0.42 | 0.19 | 30 | Myofibroblast |
| Adamts10      | 0.26 | 0.00 | 0.00 | 0.30 | 0.12 | 30 | Myofibroblast |
| Epb4.1l2      | 0.32 | 0.00 | 0.00 | 0.42 | 0.19 | 30 | Myofibroblast |
| Trim12c       | 0.29 | 0.00 | 0.00 | 0.26 | 0.10 | 30 | Myofibroblast |
| Blmh          | 0.45 | 0.00 | 0.00 | 0.38 | 0.17 | 30 | Myofibroblast |
| Erg           | 0.34 | 0.00 | 0.00 | 0.33 | 0.14 | 30 | Myofibroblast |
| Taok2         | 0.32 | 0.00 | 0.00 | 0.27 | 0.10 | 30 | Myofibroblast |
| Cnep1r1       | 0.31 | 0.00 | 0.00 | 0.29 | 0.12 | 30 | Myofibroblast |
| Casz1         | 0.33 | 0.00 | 0.00 | 0.33 | 0.14 | 30 | Myofibroblast |
| Vldlr         | 0.30 | 0.00 | 0.00 | 0.29 | 0.11 | 30 | Myofibroblast |
| Acadsb        | 0.33 | 0.00 | 0.00 | 0.28 | 0.11 | 30 | Myofibroblast |
| Arhgap29      | 0.33 | 0.00 | 0.00 | 0.46 | 0.22 | 30 | Myofibroblast |
| Zyx           | 0.27 | 0.00 | 0.00 | 0.43 | 0.20 | 30 | Myofibroblast |
| Mgll          | 0.28 | 0.00 | 0.00 | 0.37 | 0.16 | 30 | Myofibroblast |
| Selenbp2      | 0.32 | 0.00 | 0.00 | 0.38 | 0.17 | 30 | Myofibroblast |
| Tenc1         | 0.47 | 0.00 | 0.01 | 0.33 | 0.15 | 30 | Myofibroblast |
| Tmem176a      | 0.34 | 0.00 | 0.01 | 0.42 | 0.21 | 30 | Myofibroblast |
| Col6a1        | 0.32 | 0.00 | 0.01 | 0.41 | 0.19 | 30 | Myofibroblast |
| Vim           | 0.28 | 0.00 | 0.01 | 0.94 | 0.66 | 30 | Myofibroblast |
| Ccdc88a       | 0.30 | 0.00 | 0.01 | 0.50 | 0.25 | 30 | Myofibroblast |
| Nenf          | 0.35 | 0.00 | 0.01 | 0.39 | 0.18 | 30 | Myofibroblast |
| Nisch         | 0.39 | 0.00 | 0.01 | 0.56 | 0.30 | 30 | Myofibroblast |
| Efnb1         | 0.29 | 0.00 | 0.01 | 0.34 | 0.15 | 30 | Myofibroblast |
| Syne1         | 0.32 | 0.00 | 0.01 | 0.27 | 0.11 | 30 | Myofibroblast |
| Sox4          | 0.41 | 0.00 | 0.01 | 0.62 | 0.37 | 30 | Myofibroblast |
| Fbn1          | 0.26 | 0.00 | 0.01 | 0.38 | 0.17 | 30 | Myofibroblast |

|         |      |      |      |      |      |    |               |
|---------|------|------|------|------|------|----|---------------|
| Rasgrp2 | 0.36 | 0.00 | 0.01 | 0.25 | 0.10 | 30 | Myofibroblast |
| Ltbp4   | 0.34 | 0.00 | 0.01 | 0.27 | 0.11 | 30 | Myofibroblast |
| Fbln5   | 0.38 | 0.00 | 0.01 | 0.37 | 0.17 | 30 | Myofibroblast |
| Efnb2   | 0.44 | 0.00 | 0.01 | 0.33 | 0.15 | 30 | Myofibroblast |
| Polr2i  | 0.34 | 0.00 | 0.02 | 0.34 | 0.15 | 30 | Myofibroblast |
| Oaz2    | 0.31 | 0.00 | 0.02 | 0.54 | 0.29 | 30 | Myofibroblast |
| Nav1    | 0.34 | 0.00 | 0.02 | 0.28 | 0.12 | 30 | Myofibroblast |
| Zbtb20  | 0.48 | 0.00 | 0.02 | 0.50 | 0.27 | 30 | Myofibroblast |
| Tgfb1i1 | 0.28 | 0.00 | 0.02 | 0.31 | 0.13 | 30 | Myofibroblast |
| Upf3b   | 0.46 | 0.00 | 0.02 | 0.37 | 0.18 | 30 | Myofibroblast |
| Fkbp9   | 0.36 | 0.00 | 0.02 | 0.32 | 0.14 | 30 | Myofibroblast |
| Clic4   | 0.33 | 0.00 | 0.02 | 0.54 | 0.29 | 30 | Myofibroblast |
| Ttc28   | 0.31 | 0.00 | 0.03 | 0.29 | 0.12 | 30 | Myofibroblast |
| Ppp4c   | 0.32 | 0.00 | 0.03 | 0.34 | 0.16 | 30 | Myofibroblast |
| Jun     | 0.31 | 0.00 | 0.03 | 0.64 | 0.37 | 30 | Myofibroblast |
| Myo1b   | 0.27 | 0.00 | 0.03 | 0.36 | 0.17 | 30 | Myofibroblast |
| Mbnl2   | 0.33 | 0.00 | 0.03 | 0.62 | 0.35 | 30 | Myofibroblast |
| Ybx1    | 0.29 | 0.00 | 0.03 | 0.87 | 0.64 | 30 | Myofibroblast |
| Rdx     | 0.36 | 0.00 | 0.04 | 0.69 | 0.45 | 30 | Myofibroblast |
| Pbx1    | 0.32 | 0.00 | 0.04 | 0.40 | 0.20 | 30 | Myofibroblast |
| Ptprg   | 0.25 | 0.00 | 0.04 | 0.29 | 0.13 | 30 | Myofibroblast |
| Sepp1   | 0.30 | 0.00 | 0.04 | 0.67 | 0.41 | 30 | Myofibroblast |
| Dnajc8  | 0.29 | 0.00 | 0.04 | 0.71 | 0.43 | 30 | Myofibroblast |
| Timp2   | 0.30 | 0.00 | 0.04 | 0.42 | 0.21 | 30 | Myofibroblast |
| Ralbp1  | 0.26 | 0.00 | 0.05 | 0.60 | 0.33 | 30 | Myofibroblast |
| N6amt1  | 0.28 | 0.00 | 0.05 | 0.29 | 0.13 | 30 | Myofibroblast |
| Sptbn1  | 0.34 | 0.00 | 0.05 | 0.78 | 0.55 | 30 | Myofibroblast |
| Slc34a2 | 1.62 | 0.00 | 0.00 | 0.99 | 0.16 | 31 | AT2 Cell      |
| Cxcl15  | 1.58 | 0.00 | 0.00 | 0.93 | 0.15 | 31 | AT2 Cell      |
| Sftpb   | 1.72 | 0.00 | 0.00 | 0.98 | 0.18 | 31 | AT2 Cell      |
| Hc      | 1.42 | 0.00 | 0.00 | 0.81 | 0.12 | 31 | AT2 Cell      |
| Il33    | 1.14 | 0.00 | 0.00 | 0.45 | 0.04 | 31 | AT2 Cell      |
| Sftpa1  | 1.69 | 0.00 | 0.00 | 0.99 | 0.22 | 31 | AT2 Cell      |
| Lamp3   | 1.38 | 0.00 | 0.00 | 0.76 | 0.12 | 31 | AT2 Cell      |
| Sftpd   | 1.45 | 0.00 | 0.00 | 0.90 | 0.17 | 31 | AT2 Cell      |
| Sfta2   | 1.19 | 0.00 | 0.00 | 0.90 | 0.16 | 31 | AT2 Cell      |
| Lpcat1  | 1.37 | 0.00 | 0.00 | 0.93 | 0.18 | 31 | AT2 Cell      |
| S100g   | 1.28 | 0.00 | 0.00 | 0.78 | 0.13 | 31 | AT2 Cell      |
| Chi3l1  | 1.28 | 0.00 | 0.00 | 0.71 | 0.11 | 31 | AT2 Cell      |
| Bex2    | 1.39 | 0.00 | 0.00 | 0.66 | 0.11 | 31 | AT2 Cell      |
| Bex1    | 1.23 | 0.00 | 0.00 | 0.65 | 0.10 | 31 | AT2 Cell      |
| Muc1    | 1.12 | 0.00 | 0.00 | 0.60 | 0.09 | 31 | AT2 Cell      |
| Bex4    | 1.27 | 0.00 | 0.00 | 0.71 | 0.13 | 31 | AT2 Cell      |

|          |      |      |      |      |      |    |          |
|----------|------|------|------|------|------|----|----------|
| Lgi3     | 0.94 | 0.00 | 0.00 | 0.54 | 0.08 | 31 | AT2 Cell |
| Egfl6    | 0.97 | 0.00 | 0.00 | 0.55 | 0.09 | 31 | AT2 Cell |
| Dram1    | 1.13 | 0.00 | 0.00 | 0.65 | 0.12 | 31 | AT2 Cell |
| Cbr2     | 0.92 | 0.00 | 0.00 | 0.79 | 0.17 | 31 | AT2 Cell |
| Wfdc2    | 0.98 | 0.00 | 0.00 | 0.80 | 0.17 | 31 | AT2 Cell |
| Lyz1     | 1.35 | 0.00 | 0.00 | 0.81 | 0.19 | 31 | AT2 Cell |
| Napsa    | 1.08 | 0.00 | 0.00 | 0.85 | 0.20 | 31 | AT2 Cell |
| Scd1     | 1.05 | 0.00 | 0.00 | 0.54 | 0.09 | 31 | AT2 Cell |
| Slco4c1  | 0.73 | 0.00 | 0.00 | 0.29 | 0.03 | 31 | AT2 Cell |
| Rbpjl    | 0.91 | 0.00 | 0.00 | 0.45 | 0.06 | 31 | AT2 Cell |
| Ppp1r14c | 1.00 | 0.00 | 0.00 | 0.61 | 0.11 | 31 | AT2 Cell |
| Sftpc    | 1.72 | 0.00 | 0.00 | 1.00 | 0.63 | 31 | AT2 Cell |
| Cldn18   | 0.71 | 0.00 | 0.00 | 0.78 | 0.18 | 31 | AT2 Cell |
| Etv5     | 0.80 | 0.00 | 0.00 | 0.44 | 0.07 | 31 | AT2 Cell |
| Pla2g1b  | 0.67 | 0.00 | 0.00 | 0.38 | 0.05 | 31 | AT2 Cell |
| Fabp5    | 0.99 | 0.00 | 0.00 | 0.61 | 0.13 | 31 | AT2 Cell |
| Ctsh     | 0.98 | 0.00 | 0.00 | 0.78 | 0.21 | 31 | AT2 Cell |
| Kcnc3    | 0.53 | 0.00 | 0.00 | 0.29 | 0.04 | 31 | AT2 Cell |
| Lyz2     | 0.92 | 0.00 | 0.00 | 0.85 | 0.27 | 31 | AT2 Cell |
| Abca3    | 0.95 | 0.00 | 0.00 | 0.56 | 0.12 | 31 | AT2 Cell |
| Spink5   | 0.92 | 0.00 | 0.00 | 0.44 | 0.08 | 31 | AT2 Cell |
| Npc2     | 1.07 | 0.00 | 0.00 | 0.99 | 0.54 | 31 | AT2 Cell |
| Snhg11   | 0.75 | 0.00 | 0.00 | 0.29 | 0.04 | 31 | AT2 Cell |
| Nkx2-1   | 0.75 | 0.00 | 0.00 | 0.49 | 0.10 | 31 | AT2 Cell |
| Ptprf    | 0.80 | 0.00 | 0.00 | 0.63 | 0.16 | 31 | AT2 Cell |
| Atp6v1c2 | 0.61 | 0.00 | 0.00 | 0.33 | 0.05 | 31 | AT2 Cell |
| Cldn3    | 0.67 | 0.00 | 0.00 | 0.54 | 0.12 | 31 | AT2 Cell |
| Ces1d    | 0.73 | 0.00 | 0.00 | 0.64 | 0.17 | 31 | AT2 Cell |
| Lcn2     | 0.88 | 0.00 | 0.00 | 0.38 | 0.07 | 31 | AT2 Cell |
| Car8     | 0.87 | 0.00 | 0.00 | 0.39 | 0.08 | 31 | AT2 Cell |
| Acsl4    | 0.77 | 0.00 | 0.00 | 0.49 | 0.12 | 31 | AT2 Cell |
| Atp1b1   | 0.71 | 0.00 | 0.00 | 0.65 | 0.19 | 31 | AT2 Cell |
| Irx3     | 0.63 | 0.00 | 0.00 | 0.38 | 0.08 | 31 | AT2 Cell |
| Chchd10  | 0.62 | 0.00 | 0.00 | 0.53 | 0.13 | 31 | AT2 Cell |
| Cd74     | 0.61 | 0.00 | 0.00 | 0.50 | 0.13 | 31 | AT2 Cell |
| Scn7a    | 0.57 | 0.00 | 0.00 | 0.81 | 0.30 | 31 | AT2 Cell |
| Neat1    | 0.68 | 0.00 | 0.00 | 0.76 | 0.27 | 31 | AT2 Cell |
| Sdc4     | 0.63 | 0.00 | 0.00 | 0.70 | 0.23 | 31 | AT2 Cell |
| Prrg3    | 0.68 | 0.00 | 0.00 | 0.36 | 0.08 | 31 | AT2 Cell |
| Dcxr     | 0.64 | 0.00 | 0.00 | 0.44 | 0.11 | 31 | AT2 Cell |
| Rab27b   | 0.65 | 0.00 | 0.00 | 0.34 | 0.07 | 31 | AT2 Cell |
| Fasn     | 0.78 | 0.00 | 0.00 | 0.35 | 0.08 | 31 | AT2 Cell |
| Meg3     | 0.77 | 0.00 | 0.00 | 0.66 | 0.22 | 31 | AT2 Cell |

|          |      |      |      |      |      |    |          |
|----------|------|------|------|------|------|----|----------|
| Retnla   | 1.32 | 0.00 | 0.00 | 0.41 | 0.11 | 31 | AT2 Cell |
| Alcam    | 0.76 | 0.00 | 0.00 | 0.66 | 0.23 | 31 | AT2 Cell |
| Ank3     | 0.74 | 0.00 | 0.00 | 0.35 | 0.08 | 31 | AT2 Cell |
| Ctsc     | 0.69 | 0.00 | 0.00 | 0.60 | 0.20 | 31 | AT2 Cell |
| Clec1a   | 0.44 | 0.00 | 0.00 | 0.58 | 0.17 | 31 | AT2 Cell |
| Atp8a1   | 0.66 | 0.00 | 0.00 | 0.53 | 0.16 | 31 | AT2 Cell |
| Fgfr2    | 0.66 | 0.00 | 0.00 | 0.33 | 0.07 | 31 | AT2 Cell |
| Per3     | 0.74 | 0.00 | 0.00 | 0.26 | 0.05 | 31 | AT2 Cell |
| Gpr116   | 0.57 | 0.00 | 0.00 | 0.88 | 0.38 | 31 | AT2 Cell |
| Atp11a   | 0.61 | 0.00 | 0.00 | 0.43 | 0.11 | 31 | AT2 Cell |
| Pi4k2b   | 0.60 | 0.00 | 0.00 | 0.40 | 0.10 | 31 | AT2 Cell |
| Sdc1     | 0.41 | 0.00 | 0.00 | 0.45 | 0.12 | 31 | AT2 Cell |
| Epcam    | 0.64 | 0.00 | 0.00 | 0.39 | 0.10 | 31 | AT2 Cell |
| Cat      | 0.62 | 0.00 | 0.00 | 0.44 | 0.13 | 31 | AT2 Cell |
| Hpgd     | 0.40 | 0.00 | 0.00 | 0.73 | 0.26 | 31 | AT2 Cell |
| Fendrr   | 0.49 | 0.00 | 0.00 | 0.61 | 0.20 | 31 | AT2 Cell |
| Ptprb    | 0.31 | 0.00 | 0.00 | 0.66 | 0.22 | 31 | AT2 Cell |
| Trf      | 0.56 | 0.00 | 0.00 | 0.39 | 0.10 | 31 | AT2 Cell |
| Tmem100  | 0.38 | 0.00 | 0.00 | 0.80 | 0.30 | 31 | AT2 Cell |
| Gas6     | 0.64 | 0.00 | 0.00 | 0.48 | 0.15 | 31 | AT2 Cell |
| Mecom    | 0.48 | 0.00 | 0.00 | 0.39 | 0.11 | 31 | AT2 Cell |
| Rnase4   | 0.79 | 0.00 | 0.00 | 0.54 | 0.19 | 31 | AT2 Cell |
| Wbp5     | 0.77 | 0.00 | 0.00 | 0.84 | 0.48 | 31 | AT2 Cell |
| Slc39a8  | 0.47 | 0.00 | 0.00 | 0.31 | 0.08 | 31 | AT2 Cell |
| Arhgef15 | 0.48 | 0.00 | 0.00 | 0.31 | 0.08 | 31 | AT2 Cell |
| Mgst1    | 0.47 | 0.00 | 0.00 | 0.58 | 0.20 | 31 | AT2 Cell |
| Ppp1r9a  | 0.54 | 0.00 | 0.00 | 0.46 | 0.14 | 31 | AT2 Cell |
| Scd2     | 0.55 | 0.00 | 0.00 | 0.59 | 0.21 | 31 | AT2 Cell |
| Chka     | 0.55 | 0.00 | 0.00 | 0.38 | 0.10 | 31 | AT2 Cell |
| H2-Aa    | 0.33 | 0.00 | 0.00 | 0.33 | 0.08 | 31 | AT2 Cell |
| Ptgs1    | 0.41 | 0.00 | 0.00 | 0.38 | 0.11 | 31 | AT2 Cell |
| Nucb2    | 0.52 | 0.00 | 0.00 | 0.49 | 0.16 | 31 | AT2 Cell |
| Ngfrap1  | 0.54 | 0.00 | 0.00 | 0.61 | 0.24 | 31 | AT2 Cell |
| Nckap5   | 0.60 | 0.00 | 0.00 | 0.41 | 0.13 | 31 | AT2 Cell |
| Dpp4     | 0.44 | 0.00 | 0.00 | 0.43 | 0.13 | 31 | AT2 Cell |
| Brd7     | 0.69 | 0.00 | 0.00 | 0.63 | 0.26 | 31 | AT2 Cell |
| Arhgap31 | 0.42 | 0.00 | 0.00 | 0.40 | 0.12 | 31 | AT2 Cell |
| Myo5c    | 0.44 | 0.00 | 0.00 | 0.30 | 0.08 | 31 | AT2 Cell |
| Abcd3    | 0.60 | 0.00 | 0.00 | 0.50 | 0.19 | 31 | AT2 Cell |
| Pecam1   | 0.42 | 0.00 | 0.00 | 0.64 | 0.24 | 31 | AT2 Cell |
| Kit      | 0.40 | 0.00 | 0.00 | 0.31 | 0.08 | 31 | AT2 Cell |
| Cd93     | 0.28 | 0.00 | 0.00 | 0.61 | 0.22 | 31 | AT2 Cell |
| Mt1      | 0.42 | 0.00 | 0.00 | 0.46 | 0.16 | 31 | AT2 Cell |

|           |      |      |      |      |      |    |          |
|-----------|------|------|------|------|------|----|----------|
| Zdhhc3    | 0.50 | 0.00 | 0.00 | 0.45 | 0.16 | 31 | AT2 Cell |
| Pon3      | 0.42 | 0.00 | 0.00 | 0.34 | 0.10 | 31 | AT2 Cell |
| Arap3     | 0.39 | 0.00 | 0.00 | 0.29 | 0.08 | 31 | AT2 Cell |
| Cadm1     | 0.43 | 0.00 | 0.00 | 0.43 | 0.14 | 31 | AT2 Cell |
| Id2       | 0.46 | 0.00 | 0.00 | 0.71 | 0.33 | 31 | AT2 Cell |
| Serpinb6b | 0.40 | 0.00 | 0.00 | 0.48 | 0.17 | 31 | AT2 Cell |
| Tspan8    | 0.32 | 0.00 | 0.00 | 0.39 | 0.12 | 31 | AT2 Cell |
| Mbip      | 0.50 | 0.00 | 0.00 | 0.36 | 0.12 | 31 | AT2 Cell |
| Mid1ip1   | 0.54 | 0.00 | 0.00 | 0.41 | 0.14 | 31 | AT2 Cell |
| Flt1      | 0.36 | 0.00 | 0.00 | 0.46 | 0.16 | 31 | AT2 Cell |
| Cldn5     | 0.31 | 0.00 | 0.00 | 0.59 | 0.23 | 31 | AT2 Cell |
| Mapk3     | 0.35 | 0.00 | 0.00 | 0.41 | 0.14 | 31 | AT2 Cell |
| Prnp      | 0.46 | 0.00 | 0.00 | 0.38 | 0.12 | 31 | AT2 Cell |
| Cd36      | 0.41 | 0.00 | 0.00 | 0.74 | 0.33 | 31 | AT2 Cell |
| Ctla2a    | 0.50 | 0.00 | 0.00 | 0.53 | 0.21 | 31 | AT2 Cell |
| S100a16   | 0.41 | 0.00 | 0.00 | 0.59 | 0.24 | 31 | AT2 Cell |
| Stard4    | 0.39 | 0.00 | 0.00 | 0.33 | 0.10 | 31 | AT2 Cell |
| Acsl5     | 0.39 | 0.00 | 0.00 | 0.35 | 0.11 | 31 | AT2 Cell |
| Cldn7     | 0.32 | 0.00 | 0.00 | 0.29 | 0.08 | 31 | AT2 Cell |
| Sgk1      | 0.32 | 0.00 | 0.00 | 0.51 | 0.19 | 31 | AT2 Cell |
| Egfl7     | 0.25 | 0.00 | 0.00 | 0.70 | 0.28 | 31 | AT2 Cell |
| Kdr       | 0.33 | 0.00 | 0.00 | 0.45 | 0.17 | 31 | AT2 Cell |
| Cmtm8     | 0.37 | 0.00 | 0.00 | 0.38 | 0.13 | 31 | AT2 Cell |
| Soat1     | 0.36 | 0.00 | 0.00 | 0.34 | 0.11 | 31 | AT2 Cell |
| Tmem243   | 0.52 | 0.00 | 0.00 | 0.28 | 0.08 | 31 | AT2 Cell |
| Tgoln1    | 0.46 | 0.00 | 0.00 | 0.48 | 0.19 | 31 | AT2 Cell |
| Pgs1      | 0.41 | 0.00 | 0.00 | 0.26 | 0.08 | 31 | AT2 Cell |
| Npc1      | 0.48 | 0.00 | 0.00 | 0.29 | 0.09 | 31 | AT2 Cell |
| Yae1d1    | 0.44 | 0.00 | 0.00 | 0.29 | 0.09 | 31 | AT2 Cell |
| Atp1a1    | 0.34 | 0.00 | 0.00 | 0.41 | 0.15 | 31 | AT2 Cell |
| Aqp1      | 0.26 | 0.00 | 0.00 | 0.51 | 0.20 | 31 | AT2 Cell |
| Secisbp2l | 0.47 | 0.00 | 0.00 | 0.46 | 0.18 | 31 | AT2 Cell |
| Myzap     | 0.26 | 0.00 | 0.00 | 0.41 | 0.15 | 31 | AT2 Cell |
| Ptgfrn    | 0.45 | 0.00 | 0.00 | 0.30 | 0.10 | 31 | AT2 Cell |
| Erg       | 0.33 | 0.00 | 0.00 | 0.39 | 0.14 | 31 | AT2 Cell |
| Ccnd1     | 0.43 | 0.00 | 0.00 | 0.48 | 0.19 | 31 | AT2 Cell |
| Gclc      | 0.64 | 0.00 | 0.00 | 0.28 | 0.09 | 31 | AT2 Cell |
| Bcam      | 0.29 | 0.00 | 0.00 | 0.30 | 0.10 | 31 | AT2 Cell |
| Scn3b     | 0.29 | 0.00 | 0.00 | 0.26 | 0.08 | 31 | AT2 Cell |
| Taok3     | 0.40 | 0.00 | 0.00 | 0.46 | 0.19 | 31 | AT2 Cell |
| Cdh1      | 0.35 | 0.00 | 0.00 | 0.26 | 0.08 | 31 | AT2 Cell |
| H2afj     | 0.51 | 0.00 | 0.00 | 0.65 | 0.32 | 31 | AT2 Cell |
| Elovl1    | 0.43 | 0.00 | 0.00 | 0.40 | 0.15 | 31 | AT2 Cell |

|               |      |      |      |      |      |    |          |
|---------------|------|------|------|------|------|----|----------|
| Plcg1         | 0.55 | 0.00 | 0.00 | 0.41 | 0.16 | 31 | AT2 Cell |
| Mettl7a1      | 0.38 | 0.00 | 0.00 | 0.53 | 0.22 | 31 | AT2 Cell |
| Afap1l1       | 0.33 | 0.00 | 0.00 | 0.45 | 0.18 | 31 | AT2 Cell |
| Casz1         | 0.39 | 0.00 | 0.00 | 0.38 | 0.14 | 31 | AT2 Cell |
| Ptplad1       | 0.32 | 0.00 | 0.00 | 0.29 | 0.09 | 31 | AT2 Cell |
| Nrp1          | 0.42 | 0.00 | 0.00 | 0.71 | 0.39 | 31 | AT2 Cell |
| Edn1          | 0.31 | 0.00 | 0.00 | 0.30 | 0.10 | 31 | AT2 Cell |
| Acvrl1        | 0.28 | 0.00 | 0.00 | 0.45 | 0.18 | 31 | AT2 Cell |
| Tbx3          | 0.31 | 0.00 | 0.00 | 0.50 | 0.21 | 31 | AT2 Cell |
| Podxl         | 0.28 | 0.00 | 0.00 | 0.33 | 0.11 | 31 | AT2 Cell |
| Slco2a1       | 0.32 | 0.00 | 0.00 | 0.33 | 0.11 | 31 | AT2 Cell |
| Acly          | 0.46 | 0.00 | 0.00 | 0.30 | 0.10 | 31 | AT2 Cell |
| Ldb2          | 0.38 | 0.00 | 0.00 | 0.43 | 0.17 | 31 | AT2 Cell |
| Ecscr         | 0.31 | 0.00 | 0.00 | 0.44 | 0.17 | 31 | AT2 Cell |
| Sdpr          | 0.32 | 0.00 | 0.00 | 0.88 | 0.52 | 31 | AT2 Cell |
| Rassf3        | 0.39 | 0.00 | 0.00 | 0.26 | 0.09 | 31 | AT2 Cell |
| Oraov1        | 0.35 | 0.00 | 0.00 | 0.28 | 0.09 | 31 | AT2 Cell |
| Tnfaip1       | 0.34 | 0.00 | 0.00 | 0.41 | 0.16 | 31 | AT2 Cell |
| Atp13a3       | 0.26 | 0.00 | 0.00 | 0.29 | 0.10 | 31 | AT2 Cell |
| Wwc2          | 0.36 | 0.00 | 0.00 | 0.35 | 0.13 | 31 | AT2 Cell |
| Gde1          | 0.37 | 0.00 | 0.00 | 0.38 | 0.15 | 31 | AT2 Cell |
| Id1           | 0.36 | 0.00 | 0.00 | 0.53 | 0.24 | 31 | AT2 Cell |
| 1500011K16Rik | 0.36 | 0.00 | 0.00 | 0.35 | 0.13 | 31 | AT2 Cell |
| Mest          | 0.30 | 0.00 | 0.00 | 0.46 | 0.20 | 31 | AT2 Cell |
| Ano6          | 0.37 | 0.00 | 0.00 | 0.43 | 0.18 | 31 | AT2 Cell |
| Lpin2         | 0.41 | 0.00 | 0.00 | 0.38 | 0.15 | 31 | AT2 Cell |
| BC028528      | 0.30 | 0.00 | 0.00 | 0.61 | 0.29 | 31 | AT2 Cell |
| Sptlc2        | 0.29 | 0.00 | 0.00 | 0.38 | 0.15 | 31 | AT2 Cell |
| Rasgef1a      | 0.33 | 0.00 | 0.00 | 0.26 | 0.09 | 31 | AT2 Cell |
| Ccz1          | 0.34 | 0.00 | 0.00 | 0.34 | 0.13 | 31 | AT2 Cell |
| Stmn2         | 0.30 | 0.00 | 0.00 | 0.39 | 0.16 | 31 | AT2 Cell |
| Nkd1          | 0.43 | 0.00 | 0.00 | 0.30 | 0.11 | 31 | AT2 Cell |
| Esam          | 0.30 | 0.00 | 0.01 | 0.44 | 0.18 | 31 | AT2 Cell |
| 2810025M15Rik | 0.34 | 0.00 | 0.01 | 0.33 | 0.13 | 31 | AT2 Cell |
| Ushbp1        | 0.30 | 0.00 | 0.01 | 0.26 | 0.09 | 31 | AT2 Cell |
| Vamp8         | 0.42 | 0.00 | 0.01 | 0.64 | 0.35 | 31 | AT2 Cell |
| Dock9         | 0.32 | 0.00 | 0.01 | 0.28 | 0.10 | 31 | AT2 Cell |
| Sepp1         | 0.30 | 0.00 | 0.01 | 0.73 | 0.41 | 31 | AT2 Cell |
| Lphn2         | 0.38 | 0.00 | 0.01 | 0.34 | 0.14 | 31 | AT2 Cell |
| Pvrl3         | 0.45 | 0.00 | 0.01 | 0.28 | 0.10 | 31 | AT2 Cell |
| Apc           | 0.32 | 0.00 | 0.01 | 0.50 | 0.24 | 31 | AT2 Cell |
| Tmem245       | 0.42 | 0.00 | 0.01 | 0.28 | 0.10 | 31 | AT2 Cell |
| Rnaset2a      | 0.36 | 0.00 | 0.02 | 0.53 | 0.26 | 31 | AT2 Cell |

|           |      |      |      |      |      |    |          |
|-----------|------|------|------|------|------|----|----------|
| Rai14     | 0.31 | 0.00 | 0.02 | 0.29 | 0.11 | 31 | AT2 Cell |
| Ctnnd1    | 0.31 | 0.00 | 0.02 | 0.39 | 0.16 | 31 | AT2 Cell |
| Piezo2    | 0.35 | 0.00 | 0.02 | 0.30 | 0.12 | 31 | AT2 Cell |
| Sypl      | 0.28 | 0.00 | 0.03 | 0.54 | 0.26 | 31 | AT2 Cell |
| App       | 0.30 | 0.00 | 0.03 | 0.86 | 0.60 | 31 | AT2 Cell |
| Tmbim6    | 0.41 | 0.00 | 0.03 | 0.69 | 0.38 | 31 | AT2 Cell |
| Pitpnc1   | 0.37 | 0.00 | 0.03 | 0.31 | 0.13 | 31 | AT2 Cell |
| Heg1      | 0.39 | 0.00 | 0.03 | 0.38 | 0.16 | 31 | AT2 Cell |
| Mtch1     | 0.37 | 0.00 | 0.03 | 0.35 | 0.15 | 31 | AT2 Cell |
| Uhrf1bp1l | 0.37 | 0.00 | 0.03 | 0.26 | 0.10 | 31 | AT2 Cell |
| Exosc7    | 0.41 | 0.00 | 0.04 | 0.33 | 0.13 | 31 | AT2 Cell |
| Tie1      | 0.28 | 0.00 | 0.04 | 0.30 | 0.12 | 31 | AT2 Cell |
| Tmem30a   | 0.33 | 0.00 | 0.04 | 0.54 | 0.28 | 31 | AT2 Cell |
| Myh14     | 0.32 | 0.00 | 0.04 | 0.26 | 0.10 | 31 | AT2 Cell |

---

Table S8: Marker genes for individual clusters of cells from combined human and mouse cells

| Genes          | Average<br>Log<br>Fold<br>Change | Unadjusted<br>P-value | Adjusted<br>P-Value | Proportion<br>of cells in<br>Group 1 | Proportion<br>of cells in<br>Group 2 | Cluster<br>No | Sub-Type    |
|----------------|----------------------------------|-----------------------|---------------------|--------------------------------------|--------------------------------------|---------------|-------------|
| <i>LYVE1</i>   | 2.03                             | 0.00                  | 0.00                | 0.68                                 | 0.12                                 | 0             | Endothelial |
| <i>CD93</i>    | 1.95                             | 0.00                  | 0.00                | 0.77                                 | 0.11                                 | 0             | Endothelial |
| <i>GPIHBP1</i> | 1.95                             | 0.00                  | 0.00                | 0.63                                 | 0.06                                 | 0             | Endothelial |
| <i>TMEM100</i> | 1.81                             | 0.00                  | 0.00                | 0.85                                 | 0.19                                 | 0             | Endothelial |
| <i>CALCRL</i>  | 1.78                             | 0.00                  | 0.00                | 0.80                                 | 0.15                                 | 0             | Endothelial |
| <i>PTPRB</i>   | 1.70                             | 0.00                  | 0.00                | 0.73                                 | 0.11                                 | 0             | Endothelial |
| <i>C1orf54</i> | 1.70                             | 0.00                  | 0.00                | 0.79                                 | 0.20                                 | 0             | Endothelial |
| <i>SOX17</i>   | 1.70                             | 0.00                  | 0.00                | 0.52                                 | 0.06                                 | 0             | Endothelial |
| <i>SCN7A</i>   | 1.68                             | 0.00                  | 0.00                | 0.80                                 | 0.19                                 | 0             | Endothelial |
| <i>PCDH17</i>  | 1.67                             | 0.00                  | 0.00                | 0.66                                 | 0.12                                 | 0             | Endothelial |
| <i>CLEC14A</i> | 1.67                             | 0.00                  | 0.00                | 0.64                                 | 0.10                                 | 0             | Endothelial |
| <i>EGFL7</i>   | 1.66                             | 0.00                  | 0.00                | 0.88                                 | 0.17                                 | 0             | Endothelial |
| <i>HPGD</i>    | 1.62                             | 0.00                  | 0.00                | 0.70                                 | 0.18                                 | 0             | Endothelial |
| <i>CDH5</i>    | 1.61                             | 0.00                  | 0.00                | 0.77                                 | 0.13                                 | 0             | Endothelial |
| <i>PLVAP</i>   | 1.59                             | 0.00                  | 0.00                | 0.46                                 | 0.05                                 | 0             | Endothelial |
| <i>EPAS1</i>   | 1.57                             | 0.00                  | 0.00                | 0.75                                 | 0.18                                 | 0             | Endothelial |
| <i>TSPAN7</i>  | 1.56                             | 0.00                  | 0.00                | 0.65                                 | 0.13                                 | 0             | Endothelial |
| <i>RAMP2</i>   | 1.56                             | 0.00                  | 0.00                | 0.85                                 | 0.19                                 | 0             | Endothelial |
| <i>CYYR1</i>   | 1.55                             | 0.00                  | 0.00                | 0.51                                 | 0.08                                 | 0             | Endothelial |
| <i>TEK</i>     | 1.54                             | 0.00                  | 0.00                | 0.48                                 | 0.05                                 | 0             | Endothelial |
| <i>RASGRP3</i> | 1.50                             | 0.00                  | 0.00                | 0.46                                 | 0.06                                 | 0             | Endothelial |
| <i>PECAM1</i>  | 1.48                             | 0.00                  | 0.00                | 0.75                                 | 0.15                                 | 0             | Endothelial |
| <i>LDB2</i>    | 1.46                             | 0.00                  | 0.00                | 0.54                                 | 0.10                                 | 0             | Endothelial |
| <i>S100A16</i> | 1.41                             | 0.00                  | 0.00                | 0.66                                 | 0.18                                 | 0             | Endothelial |
| <i>CD200</i>   | 1.40                             | 0.00                  | 0.00                | 0.57                                 | 0.21                                 | 0             | Endothelial |
| <i>CLEC1A</i>  | 1.38                             | 0.00                  | 0.00                | 0.55                                 | 0.09                                 | 0             | Endothelial |
| <i>EDN1</i>    | 1.36                             | 0.00                  | 0.00                | 0.34                                 | 0.05                                 | 0             | Endothelial |
| <i>SLC43A3</i> | 1.36                             | 0.00                  | 0.00                | 0.54                                 | 0.12                                 | 0             | Endothelial |
| <i>CD36</i>    | 1.35                             | 0.00                  | 0.00                | 0.75                                 | 0.25                                 | 0             | Endothelial |
| <i>MYZAP</i>   | 1.34                             | 0.00                  | 0.00                | 0.48                                 | 0.08                                 | 0             | Endothelial |
| <i>STMN2</i>   | 1.34                             | 0.00                  | 0.00                | 0.46                                 | 0.09                                 | 0             | Endothelial |
| <i>PALMD</i>   | 1.34                             | 0.00                  | 0.00                | 0.40                                 | 0.07                                 | 0             | Endothelial |
| <i>AQP1</i>    | 1.32                             | 0.00                  | 0.00                | 0.56                                 | 0.14                                 | 0             | Endothelial |
| <i>TM4SF1</i>  | 1.32                             | 0.00                  | 0.00                | 0.61                                 | 0.15                                 | 0             | Endothelial |
| <i>SEMA3C</i>  | 1.32                             | 0.00                  | 0.00                | 0.47                                 | 0.14                                 | 0             | Endothelial |
| <i>CLDN5</i>   | 1.31                             | 0.00                  | 0.00                | 0.73                                 | 0.14                                 | 0             | Endothelial |
| <i>TSPAN18</i> | 1.31                             | 0.00                  | 0.00                | 0.44                                 | 0.07                                 | 0             | Endothelial |
| <i>KIT</i>     | 1.31                             | 0.00                  | 0.00                | 0.33                                 | 0.03                                 | 0             | Endothelial |

|                 |      |      |      |      |      |   |             |
|-----------------|------|------|------|------|------|---|-------------|
| <i>RASIP1</i>   | 1.30 | 0.00 | 0.00 | 0.42 | 0.06 | 0 | Endothelial |
| <i>EFNB2</i>    | 1.28 | 0.00 | 0.00 | 0.43 | 0.09 | 0 | Endothelial |
| <i>GATA2</i>    | 1.27 | 0.00 | 0.00 | 0.44 | 0.08 | 0 | Endothelial |
| <i>ACER2</i>    | 1.25 | 0.00 | 0.00 | 0.33 | 0.04 | 0 | Endothelial |
| <i>THBD</i>     | 1.25 | 0.00 | 0.00 | 0.61 | 0.18 | 0 | Endothelial |
| <i>RIPPLY3</i>  | 1.24 | 0.00 | 0.00 | 0.40 | 0.06 | 0 | Endothelial |
| <i>EHD4</i>     | 1.24 | 0.00 | 0.00 | 0.65 | 0.19 | 0 | Endothelial |
| <i>NOSTRIN</i>  | 1.24 | 0.00 | 0.00 | 0.45 | 0.09 | 0 | Endothelial |
| <i>ECSCR</i>    | 1.24 | 0.00 | 0.00 | 0.51 | 0.09 | 0 | Endothelial |
| <i>TIE1</i>     | 1.23 | 0.00 | 0.00 | 0.40 | 0.06 | 0 | Endothelial |
| <i>AFAP1L1</i>  | 1.21 | 0.00 | 0.00 | 0.48 | 0.11 | 0 | Endothelial |
| <i>TSPAN13</i>  | 1.21 | 0.00 | 0.00 | 0.66 | 0.16 | 0 | Endothelial |
| <i>ACVRL1</i>   | 1.19 | 0.00 | 0.00 | 0.52 | 0.12 | 0 | Endothelial |
| <i>SGK1</i>     | 1.19 | 0.00 | 0.00 | 0.47 | 0.13 | 0 | Endothelial |
| <i>ITGA6</i>    | 1.18 | 0.00 | 0.00 | 0.38 | 0.08 | 0 | Endothelial |
| <i>FLT1</i>     | 1.18 | 0.00 | 0.00 | 0.45 | 0.09 | 0 | Endothelial |
| <i>ESAM</i>     | 1.16 | 0.00 | 0.00 | 0.54 | 0.14 | 0 | Endothelial |
| <i>CAV1</i>     | 1.16 | 0.00 | 0.00 | 0.78 | 0.29 | 0 | Endothelial |
| <i>MYCT1</i>    | 1.15 | 0.00 | 0.00 | 0.41 | 0.07 | 0 | Endothelial |
| <i>SEMA3G</i>   | 1.15 | 0.00 | 0.00 | 0.27 | 0.03 | 0 | Endothelial |
| <i>ECE1</i>     | 1.15 | 0.00 | 0.00 | 0.58 | 0.18 | 0 | Endothelial |
| <i>RNF144A</i>  | 1.15 | 0.00 | 0.00 | 0.40 | 0.10 | 0 | Endothelial |
| <i>USHBP1</i>   | 1.15 | 0.00 | 0.00 | 0.31 | 0.04 | 0 | Endothelial |
| <i>SLC9A3R2</i> | 1.14 | 0.00 | 0.00 | 0.55 | 0.17 | 0 | Endothelial |
| <i>CXCL12</i>   | 1.14 | 0.00 | 0.00 | 0.31 | 0.10 | 0 | Endothelial |
| <i>KLF4</i>     | 1.10 | 0.00 | 0.00 | 0.51 | 0.18 | 0 | Endothelial |
| <i>APLNR</i>    | 1.09 | 0.00 | 0.00 | 0.28 | 0.04 | 0 | Endothelial |
| <i>PODXL</i>    | 1.07 | 0.00 | 0.00 | 0.33 | 0.07 | 0 | Endothelial |
| <i>ICAM2</i>    | 1.06 | 0.00 | 0.00 | 0.49 | 0.11 | 0 | Endothelial |
| <i>KLHL5</i>    | 1.06 | 0.00 | 0.00 | 0.37 | 0.09 | 0 | Endothelial |
| <i>FMO1</i>     | 1.05 | 0.00 | 0.00 | 0.33 | 0.07 | 0 | Endothelial |
| <i>SLCO2A1</i>  | 1.05 | 0.00 | 0.00 | 0.34 | 0.07 | 0 | Endothelial |
| <i>TMEM88</i>   | 1.04 | 0.00 | 0.00 | 0.32 | 0.06 | 0 | Endothelial |
| <i>GJA4</i>     | 1.03 | 0.00 | 0.00 | 0.25 | 0.04 | 0 | Endothelial |
| <i>TUBB2A</i>   | 1.03 | 0.00 | 0.00 | 0.45 | 0.17 | 0 | Endothelial |
| <i>EMCN</i>     | 1.02 | 0.00 | 0.00 | 0.37 | 0.07 | 0 | Endothelial |
| <i>CCND1</i>    | 1.00 | 0.00 | 0.00 | 0.43 | 0.15 | 0 | Endothelial |
| <i>PDE4B</i>    | 0.99 | 0.00 | 0.00 | 0.34 | 0.10 | 0 | Endothelial |
| <i>PPP1R16B</i> | 0.98 | 0.00 | 0.00 | 0.28 | 0.05 | 0 | Endothelial |
| <i>S1PR1</i>    | 0.98 | 0.00 | 0.00 | 0.46 | 0.14 | 0 | Endothelial |
| <i>ADCY4</i>    | 0.97 | 0.00 | 0.00 | 0.28 | 0.05 | 0 | Endothelial |
| <i>ETS1</i>     | 0.97 | 0.00 | 0.00 | 0.54 | 0.18 | 0 | Endothelial |
| <i>KIAA0355</i> | 0.97 | 0.00 | 0.00 | 0.41 | 0.13 | 0 | Endothelial |

|                 |      |      |      |      |      |   |             |
|-----------------|------|------|------|------|------|---|-------------|
| <i>SLC6A6</i>   | 0.96 | 0.00 | 0.00 | 0.45 | 0.19 | 0 | Endothelial |
| <i>ARHGEF15</i> | 0.94 | 0.00 | 0.00 | 0.26 | 0.04 | 0 | Endothelial |
| <i>RHOJ</i>     | 0.94 | 0.00 | 0.00 | 0.42 | 0.13 | 0 | Endothelial |
| <i>TJP1</i>     | 0.93 | 0.00 | 0.00 | 0.39 | 0.13 | 0 | Endothelial |
| <i>TUBB2B</i>   | 0.93 | 0.00 | 0.00 | 0.31 | 0.09 | 0 | Endothelial |
| <i>TBX3</i>     | 0.92 | 0.00 | 0.00 | 0.48 | 0.16 | 0 | Endothelial |
| <i>HOXA5</i>    | 0.92 | 0.00 | 0.00 | 0.32 | 0.10 | 0 | Endothelial |
| <i>LXN</i>      | 0.91 | 0.00 | 0.00 | 0.31 | 0.09 | 0 | Endothelial |
| <i>ADAM15</i>   | 0.90 | 0.00 | 0.00 | 0.25 | 0.05 | 0 | Endothelial |
| <i>TNFSF10</i>  | 0.90 | 0.00 | 0.00 | 0.29 | 0.07 | 0 | Endothelial |
| <i>MCAM</i>     | 0.89 | 0.00 | 0.00 | 0.36 | 0.09 | 0 | Endothelial |
| <i>GRAP</i>     | 0.89 | 0.00 | 0.00 | 0.34 | 0.08 | 0 | Endothelial |
| <i>ELK3</i>     | 0.89 | 0.00 | 0.00 | 0.34 | 0.10 | 0 | Endothelial |
| <i>KANK3</i>    | 0.89 | 0.00 | 0.00 | 0.34 | 0.10 | 0 | Endothelial |
| <i>FKBP1A</i>   | 0.89 | 0.00 | 0.00 | 0.71 | 0.38 | 0 | Endothelial |
| <i>CAV2</i>     | 0.88 | 0.00 | 0.00 | 0.48 | 0.17 | 0 | Endothelial |
| <i>CRIP2</i>    | 0.88 | 0.00 | 0.00 | 0.72 | 0.38 | 0 | Endothelial |
| <i>KLF2</i>     | 0.88 | 0.00 | 0.00 | 0.40 | 0.16 | 0 | Endothelial |
| <i>CD34</i>     | 0.88 | 0.00 | 0.00 | 0.45 | 0.16 | 0 | Endothelial |
| <i>PEG3</i>     | 0.88 | 0.00 | 0.00 | 0.49 | 0.22 | 0 | Endothelial |
| <i>PIEZO2</i>   | 0.88 | 0.00 | 0.00 | 0.29 | 0.08 | 0 | Endothelial |
| <i>PTPRM</i>    | 0.88 | 0.00 | 0.00 | 0.25 | 0.07 | 0 | Endothelial |
| <i>AHR</i>      | 0.87 | 0.00 | 0.00 | 0.27 | 0.06 | 0 | Endothelial |
| <i>GNG11</i>    | 0.86 | 0.00 | 0.00 | 0.60 | 0.26 | 0 | Endothelial |
| <i>GIMAP1</i>   | 0.86 | 0.00 | 0.00 | 0.35 | 0.09 | 0 | Endothelial |
| <i>PLCB4</i>    | 0.86 | 0.00 | 0.00 | 0.28 | 0.09 | 0 | Endothelial |
| <i>TCF4</i>     | 0.86 | 0.00 | 0.00 | 0.67 | 0.37 | 0 | Endothelial |
| <i>PTPRG</i>    | 0.86 | 0.00 | 0.00 | 0.29 | 0.09 | 0 | Endothelial |
| <i>RGS12</i>    | 0.86 | 0.00 | 0.00 | 0.30 | 0.08 | 0 | Endothelial |
| <i>LY6E</i>     | 0.85 | 0.00 | 0.00 | 0.77 | 0.36 | 0 | Endothelial |
| <i>HEG1</i>     | 0.85 | 0.00 | 0.00 | 0.36 | 0.12 | 0 | Endothelial |
| <i>SLFN5</i>    | 0.85 | 0.00 | 0.00 | 0.28 | 0.07 | 0 | Endothelial |
| <i>ARHGAP29</i> | 0.85 | 0.00 | 0.00 | 0.45 | 0.19 | 0 | Endothelial |
| <i>SNRK</i>     | 0.85 | 0.00 | 0.00 | 0.35 | 0.12 | 0 | Endothelial |
| <i>SLK</i>      | 0.84 | 0.00 | 0.00 | 0.63 | 0.36 | 0 | Endothelial |
| <i>DDAH2</i>    | 0.84 | 0.00 | 0.00 | 0.51 | 0.24 | 0 | Endothelial |
| <i>MARCKS</i>   | 0.84 | 0.00 | 0.00 | 0.75 | 0.45 | 0 | Endothelial |
| <i>FOXF1</i>    | 0.84 | 0.00 | 0.00 | 0.31 | 0.10 | 0 | Endothelial |
| <i>JUP</i>      | 0.83 | 0.00 | 0.00 | 0.36 | 0.12 | 0 | Endothelial |
| <i>MEIS2</i>    | 0.83 | 0.00 | 0.00 | 0.27 | 0.09 | 0 | Endothelial |
| <i>NOTCH1</i>   | 0.82 | 0.00 | 0.00 | 0.29 | 0.09 | 0 | Endothelial |
| <i>SEMA6A</i>   | 0.82 | 0.00 | 0.00 | 0.30 | 0.08 | 0 | Endothelial |
| <i>SRGN</i>     | 0.82 | 0.00 | 0.00 | 0.67 | 0.25 | 0 | Endothelial |

|                 |      |      |      |      |      |   |             |
|-----------------|------|------|------|------|------|---|-------------|
| <i>FNBP1L</i>   | 0.81 | 0.00 | 0.00 | 0.44 | 0.21 | 0 | Endothelial |
| <i>RAPGEF5</i>  | 0.81 | 0.00 | 0.00 | 0.28 | 0.08 | 0 | Endothelial |
| <i>KDR</i>      | 0.80 | 0.00 | 0.00 | 0.45 | 0.11 | 0 | Endothelial |
| <i>TCN2</i>     | 0.80 | 0.00 | 0.00 | 0.27 | 0.08 | 0 | Endothelial |
| <i>FLI1</i>     | 0.80 | 0.00 | 0.00 | 0.29 | 0.08 | 0 | Endothelial |
| <i>PPP1R2</i>   | 0.79 | 0.00 | 0.00 | 0.45 | 0.20 | 0 | Endothelial |
| <i>ENG</i>      | 0.79 | 0.00 | 0.00 | 0.30 | 0.10 | 0 | Endothelial |
| <i>SPTBN1</i>   | 0.79 | 0.00 | 0.00 | 0.78 | 0.49 | 0 | Endothelial |
| <i>KLF7</i>     | 0.79 | 0.00 | 0.00 | 0.37 | 0.14 | 0 | Endothelial |
| <i>COL4A1</i>   | 0.78 | 0.00 | 0.00 | 0.76 | 0.46 | 0 | Endothelial |
| <i>GIMAP6</i>   | 0.78 | 0.00 | 0.00 | 0.38 | 0.11 | 0 | Endothelial |
| <i>COL4A2</i>   | 0.77 | 0.00 | 0.00 | 0.70 | 0.40 | 0 | Endothelial |
| <i>NAV1</i>     | 0.77 | 0.00 | 0.00 | 0.26 | 0.08 | 0 | Endothelial |
| <i>BST2</i>     | 0.75 | 0.00 | 0.00 | 0.34 | 0.12 | 0 | Endothelial |
| <i>CYTH3</i>    | 0.75 | 0.00 | 0.00 | 0.44 | 0.19 | 0 | Endothelial |
| <i>ANP32A</i>   | 0.74 | 0.00 | 0.00 | 0.78 | 0.54 | 0 | Endothelial |
| <i>GIMAP4</i>   | 0.73 | 0.00 | 0.00 | 0.42 | 0.13 | 0 | Endothelial |
| <i>CLIC5</i>    | 0.72 | 0.00 | 0.00 | 0.53 | 0.17 | 0 | Endothelial |
| <i>ITM2B</i>    | 0.71 | 0.00 | 0.00 | 0.90 | 0.75 | 0 | Endothelial |
| <i>SPARCL1</i>  | 0.68 | 0.00 | 0.00 | 0.63 | 0.37 | 0 | Endothelial |
| <i>GNAI2</i>    | 0.65 | 0.00 | 0.00 | 0.60 | 0.34 | 0 | Endothelial |
| <i>JUN</i>      | 0.63 | 0.00 | 0.00 | 0.62 | 0.33 | 0 | Endothelial |
| <i>NRP1</i>     | 0.63 | 0.00 | 0.00 | 0.60 | 0.35 | 0 | Endothelial |
| <i>KITLG</i>    | 0.56 | 0.00 | 0.00 | 0.45 | 0.17 | 0 | Endothelial |
| <i>VIM</i>      | 0.42 | 0.00 | 0.00 | 0.89 | 0.65 | 0 | Endothelial |
| <i>ARHGEF12</i> | 0.78 | 0.00 | 0.00 | 0.42 | 0.20 | 0 | Endothelial |
| <i>PREX2</i>    | 0.78 | 0.00 | 0.00 | 0.34 | 0.14 | 0 | Endothelial |
| <i>GCC2</i>     | 0.78 | 0.00 | 0.00 | 0.42 | 0.21 | 0 | Endothelial |
| <i>CNN3</i>     | 0.58 | 0.00 | 0.00 | 0.54 | 0.29 | 0 | Endothelial |
| <i>CCDC85B</i>  | 0.71 | 0.00 | 0.00 | 0.30 | 0.11 | 0 | Endothelial |
| <i>STMN1</i>    | 0.75 | 0.00 | 0.00 | 0.42 | 0.21 | 0 | Endothelial |
| <i>PLTP</i>     | 0.75 | 0.00 | 0.00 | 0.34 | 0.14 | 0 | Endothelial |
| <i>CD9</i>      | 0.47 | 0.00 | 0.00 | 0.58 | 0.32 | 0 | Endothelial |
| <i>GALNT18</i>  | 0.70 | 0.00 | 0.00 | 0.25 | 0.08 | 0 | Endothelial |
| <i>CYB5R3</i>   | 0.72 | 0.00 | 0.00 | 0.57 | 0.36 | 0 | Endothelial |
| <i>HIP1</i>     | 0.73 | 0.00 | 0.00 | 0.31 | 0.12 | 0 | Endothelial |
| <i>DNAJC8</i>   | 0.65 | 0.00 | 0.00 | 0.60 | 0.39 | 0 | Endothelial |
| <i>SMARCA2</i>  | 0.74 | 0.00 | 0.00 | 0.51 | 0.30 | 0 | Endothelial |
| <i>ZEB1</i>     | 0.73 | 0.00 | 0.00 | 0.25 | 0.09 | 0 | Endothelial |
| <i>RAB11A</i>   | 0.68 | 0.00 | 0.00 | 0.45 | 0.24 | 0 | Endothelial |
| <i>CTNNA1</i>   | 0.66 | 0.00 | 0.00 | 0.54 | 0.33 | 0 | Endothelial |
| <i>MYL12B</i>   | 0.51 | 0.00 | 0.00 | 0.75 | 0.60 | 0 | Endothelial |
| <i>DLC1</i>     | 0.69 | 0.00 | 0.00 | 0.34 | 0.15 | 0 | Endothelial |

|                 |      |      |      |      |      |   |             |
|-----------------|------|------|------|------|------|---|-------------|
| <i>RGCC</i>     | 0.45 | 0.00 | 0.00 | 0.37 | 0.16 | 0 | Endothelial |
| <i>ITGB1</i>    | 0.43 | 0.00 | 0.00 | 0.79 | 0.61 | 0 | Endothelial |
| <i>CARHSP1</i>  | 0.69 | 0.00 | 0.00 | 0.30 | 0.13 | 0 | Endothelial |
| <i>UACA</i>     | 0.70 | 0.00 | 0.00 | 0.29 | 0.12 | 0 | Endothelial |
| <i>LUZP1</i>    | 0.71 | 0.00 | 0.00 | 0.35 | 0.17 | 0 | Endothelial |
| <i>SNX3</i>     | 0.62 | 0.00 | 0.00 | 0.52 | 0.32 | 0 | Endothelial |
| <i>PEA15</i>    | 0.65 | 0.00 | 0.00 | 0.29 | 0.12 | 0 | Endothelial |
| <i>PLCG1</i>    | 0.68 | 0.00 | 0.00 | 0.30 | 0.13 | 0 | Endothelial |
| <i>NES</i>      | 0.46 | 0.00 | 0.00 | 0.39 | 0.18 | 0 | Endothelial |
| <i>RHOC</i>     | 0.62 | 0.00 | 0.00 | 0.40 | 0.21 | 0 | Endothelial |
| <i>EFNB1</i>    | 0.68 | 0.00 | 0.00 | 0.29 | 0.12 | 0 | Endothelial |
| <i>HDAC7</i>    | 0.64 | 0.00 | 0.00 | 0.27 | 0.11 | 0 | Endothelial |
| <i>SASH1</i>    | 0.68 | 0.00 | 0.00 | 0.26 | 0.11 | 0 | Endothelial |
| <i>BTBD3</i>    | 0.67 | 0.00 | 0.00 | 0.28 | 0.12 | 0 | Endothelial |
| <i>ABLIM1</i>   | 0.65 | 0.00 | 0.00 | 0.39 | 0.20 | 0 | Endothelial |
| <i>PLK2</i>     | 0.69 | 0.00 | 0.00 | 0.31 | 0.14 | 0 | Endothelial |
| <i>MGLL</i>     | 0.64 | 0.00 | 0.00 | 0.31 | 0.15 | 0 | Endothelial |
| <i>RAP1A</i>    | 0.54 | 0.00 | 0.00 | 0.46 | 0.27 | 0 | Endothelial |
| <i>HES1</i>     | 0.61 | 0.00 | 0.00 | 0.45 | 0.26 | 0 | Endothelial |
| <i>CLIC1</i>    | 0.52 | 0.00 | 0.00 | 0.55 | 0.36 | 0 | Endothelial |
| <i>ACTN4</i>    | 0.60 | 0.00 | 0.00 | 0.45 | 0.27 | 0 | Endothelial |
| <i>WASF2</i>    | 0.59 | 0.00 | 0.00 | 0.46 | 0.28 | 0 | Endothelial |
| <i>TAX1BP1</i>  | 0.55 | 0.00 | 0.00 | 0.71 | 0.58 | 0 | Endothelial |
| <i>FERMT2</i>   | 0.44 | 0.00 | 0.00 | 0.56 | 0.36 | 0 | Endothelial |
| <i>CD151</i>    | 0.57 | 0.00 | 0.00 | 0.33 | 0.17 | 0 | Endothelial |
| <i>ELOVL5</i>   | 0.61 | 0.00 | 0.00 | 0.27 | 0.13 | 0 | Endothelial |
| <i>BNIP2</i>    | 0.56 | 0.00 | 0.00 | 0.43 | 0.26 | 0 | Endothelial |
| <i>XIAP</i>     | 0.62 | 0.00 | 0.00 | 0.32 | 0.17 | 0 | Endothelial |
| <i>ARL2BP</i>   | 0.64 | 0.00 | 0.00 | 0.26 | 0.12 | 0 | Endothelial |
| <i>APLP2</i>    | 0.52 | 0.00 | 0.00 | 0.55 | 0.38 | 0 | Endothelial |
| <i>ANXA3</i>    | 0.44 | 0.00 | 0.00 | 0.37 | 0.19 | 0 | Endothelial |
| <i>TMEM204</i>  | 0.50 | 0.00 | 0.00 | 0.29 | 0.14 | 0 | Endothelial |
| <i>CTNND1</i>   | 0.58 | 0.00 | 0.00 | 0.29 | 0.15 | 0 | Endothelial |
| <i>DUSP6</i>    | 0.54 | 0.00 | 0.00 | 0.31 | 0.16 | 0 | Endothelial |
| <i>CBFA2T3</i>  | 0.49 | 0.00 | 0.00 | 0.26 | 0.12 | 0 | Endothelial |
| <i>GUK1</i>     | 0.64 | 0.00 | 0.00 | 0.32 | 0.17 | 0 | Endothelial |
| <i>MAPK3</i>    | 0.59 | 0.00 | 0.00 | 0.25 | 0.12 | 0 | Endothelial |
| <i>SH3GLB1</i>  | 0.51 | 0.00 | 0.00 | 0.52 | 0.35 | 0 | Endothelial |
| <i>LEPROT</i>   | 0.54 | 0.00 | 0.00 | 0.48 | 0.31 | 0 | Endothelial |
| <i>ITPRIPL2</i> | 0.62 | 0.00 | 0.00 | 0.29 | 0.14 | 0 | Endothelial |
| <i>ZNF503</i>   | 0.59 | 0.00 | 0.00 | 0.28 | 0.14 | 0 | Endothelial |
| <i>ACAP2</i>    | 0.58 | 0.00 | 0.00 | 0.31 | 0.16 | 0 | Endothelial |
| <i>ATP1B3</i>   | 0.52 | 0.00 | 0.00 | 0.40 | 0.23 | 0 | Endothelial |

|                 |      |      |      |      |      |   |             |
|-----------------|------|------|------|------|------|---|-------------|
| <i>MAP7D1</i>   | 0.58 | 0.00 | 0.00 | 0.31 | 0.16 | 0 | Endothelial |
| <i>SPTAN1</i>   | 0.58 | 0.00 | 0.00 | 0.29 | 0.15 | 0 | Endothelial |
| <i>SYPL1</i>    | 0.54 | 0.00 | 0.00 | 0.39 | 0.24 | 0 | Endothelial |
| <i>ADD3</i>     | 0.48 | 0.00 | 0.00 | 0.41 | 0.25 | 0 | Endothelial |
| <i>MXRA7</i>    | 0.50 | 0.00 | 0.00 | 0.26 | 0.12 | 0 | Endothelial |
| <i>SERINC3</i>  | 0.61 | 0.00 | 0.00 | 0.43 | 0.28 | 0 | Endothelial |
| <i>CSRP2</i>    | 0.45 | 0.00 | 0.00 | 0.28 | 0.14 | 0 | Endothelial |
| <i>IER2</i>     | 0.47 | 0.00 | 0.00 | 0.39 | 0.23 | 0 | Endothelial |
| <i>MXD4</i>     | 0.55 | 0.00 | 0.00 | 0.47 | 0.34 | 0 | Endothelial |
| <i>CLIC4</i>    | 0.49 | 0.00 | 0.00 | 0.42 | 0.28 | 0 | Endothelial |
| <i>TPM4</i>     | 0.37 | 0.00 | 0.00 | 0.63 | 0.49 | 0 | Endothelial |
| <i>DNAJA1</i>   | 0.38 | 0.00 | 0.00 | 0.62 | 0.49 | 0 | Endothelial |
| <i>AMOTL1</i>   | 0.49 | 0.00 | 0.00 | 0.26 | 0.14 | 0 | Endothelial |
| <i>GLUL</i>     | 0.48 | 0.00 | 0.00 | 0.33 | 0.20 | 0 | Endothelial |
| <i>IVNS1ABP</i> | 0.74 | 0.00 | 0.00 | 0.32 | 0.19 | 0 | Endothelial |
| <i>NFKBIA</i>   | 0.46 | 0.00 | 0.00 | 0.48 | 0.34 | 0 | Endothelial |
| <i>DRAM2</i>    | 0.52 | 0.00 | 0.00 | 0.26 | 0.15 | 0 | Endothelial |
| <i>TPM3</i>     | 0.25 | 0.00 | 0.00 | 0.77 | 0.65 | 0 | Endothelial |
| <i>MSN</i>      | 0.33 | 0.00 | 0.00 | 0.57 | 0.42 | 0 | Endothelial |
| <i>ADAMTS1</i>  | 0.47 | 0.00 | 0.00 | 0.31 | 0.18 | 0 | Endothelial |
| <i>EDNRB</i>    | 0.37 | 0.00 | 0.00 | 0.27 | 0.14 | 0 | Endothelial |
| <i>MEF2A</i>    | 0.40 | 0.00 | 0.00 | 0.46 | 0.32 | 0 | Endothelial |
| <i>CSNK1A1</i>  | 0.35 | 0.00 | 0.00 | 0.62 | 0.49 | 0 | Endothelial |
| <i>HMG20B</i>   | 0.46 | 0.00 | 0.00 | 0.44 | 0.31 | 0 | Endothelial |
| <i>ZMIZ1</i>    | 0.46 | 0.00 | 0.00 | 0.31 | 0.19 | 0 | Endothelial |
| <i>CTNNB1</i>   | 0.42 | 0.00 | 0.00 | 0.46 | 0.33 | 0 | Endothelial |
| <i>TOP1</i>     | 0.42 | 0.00 | 0.00 | 0.53 | 0.41 | 0 | Endothelial |
| <i>MARCKSL1</i> | 0.47 | 0.00 | 0.00 | 0.33 | 0.21 | 0 | Endothelial |
| <i>SOX4</i>     | 0.35 | 0.00 | 0.00 | 0.52 | 0.38 | 0 | Endothelial |
| <i>EHD2</i>     | 0.43 | 0.00 | 0.00 | 0.26 | 0.15 | 0 | Endothelial |
| <i>IGFBP4</i>   | 0.28 | 0.00 | 0.00 | 0.39 | 0.25 | 0 | Endothelial |
| <i>RHOA</i>     | 0.33 | 0.00 | 0.00 | 0.57 | 0.47 | 0 | Endothelial |
| <i>S100A13</i>  | 0.41 | 0.00 | 0.00 | 0.37 | 0.25 | 0 | Endothelial |
| <i>RELL1</i>    | 0.41 | 0.00 | 0.00 | 0.28 | 0.17 | 0 | Endothelial |
| <i>ARGLU1</i>   | 0.38 | 0.00 | 0.00 | 0.51 | 0.40 | 0 | Endothelial |
| <i>QKI</i>      | 0.38 | 0.00 | 0.00 | 0.39 | 0.27 | 0 | Endothelial |
| <i>CD2AP</i>    | 0.38 | 0.00 | 0.00 | 0.42 | 0.30 | 0 | Endothelial |
| <i>ATP2B1</i>   | 0.32 | 0.00 | 0.00 | 0.65 | 0.54 | 0 | Endothelial |
| <i>DYNLL1</i>   | 0.33 | 0.00 | 0.00 | 0.56 | 0.45 | 0 | Endothelial |
| <i>RALB</i>     | 0.37 | 0.00 | 0.00 | 0.28 | 0.18 | 0 | Endothelial |
| <i>ARHGEF2</i>  | 0.40 | 0.00 | 0.00 | 0.28 | 0.18 | 0 | Endothelial |
| <i>SNRPB</i>    | 0.36 | 0.00 | 0.00 | 0.45 | 0.34 | 0 | Endothelial |
| <i>RBPM5</i>    | 0.39 | 0.00 | 0.00 | 0.27 | 0.17 | 0 | Endothelial |

|                |      |      |      |      |      |   |             |
|----------------|------|------|------|------|------|---|-------------|
| <i>NDUFA8</i>  | 0.40 | 0.00 | 0.00 | 0.34 | 0.23 | 0 | Endothelial |
| <i>FUBP1</i>   | 0.41 | 0.00 | 0.00 | 0.32 | 0.22 | 0 | Endothelial |
| <i>RNF7</i>    | 0.40 | 0.00 | 0.00 | 0.34 | 0.24 | 0 | Endothelial |
| <i>HOOK3</i>   | 0.40 | 0.00 | 0.00 | 0.31 | 0.20 | 0 | Endothelial |
| <i>H1FO</i>    | 0.43 | 0.00 | 0.00 | 0.35 | 0.25 | 0 | Endothelial |
| <i>PHLDB2</i>  | 0.36 | 0.00 | 0.00 | 0.37 | 0.26 | 0 | Endothelial |
| <i>ANP32E</i>  | 0.36 | 0.00 | 0.00 | 0.35 | 0.24 | 0 | Endothelial |
| <i>YWHAB</i>   | 0.28 | 0.00 | 0.00 | 0.65 | 0.56 | 0 | Endothelial |
| <i>GNB1</i>    | 0.39 | 0.00 | 0.00 | 0.30 | 0.20 | 0 | Endothelial |
| <i>PHF20L1</i> | 0.39 | 0.00 | 0.00 | 0.35 | 0.25 | 0 | Endothelial |
| <i>TXNIP</i>   | 0.37 | 0.00 | 0.00 | 0.36 | 0.25 | 0 | Endothelial |
| <i>ITSN2</i>   | 0.32 | 0.00 | 0.00 | 0.32 | 0.22 | 0 | Endothelial |
| <i>OAZ2</i>    | 0.41 | 0.00 | 0.00 | 0.39 | 0.29 | 0 | Endothelial |
| <i>FCHO2</i>   | 0.35 | 0.00 | 0.00 | 0.25 | 0.16 | 0 | Endothelial |
| <i>RAB6A</i>   | 0.38 | 0.00 | 0.00 | 0.28 | 0.20 | 0 | Endothelial |
| <i>ARPC3</i>   | 0.33 | 0.00 | 0.00 | 0.37 | 0.27 | 0 | Endothelial |
| <i>NAP1L4</i>  | 0.33 | 0.00 | 0.00 | 0.33 | 0.24 | 0 | Endothelial |
| <i>ZNF326</i>  | 0.35 | 0.00 | 0.00 | 0.29 | 0.21 | 0 | Endothelial |
| <i>DYNC1I2</i> | 0.29 | 0.00 | 0.00 | 0.55 | 0.47 | 0 | Endothelial |
| <i>ARF1</i>    | 0.30 | 0.00 | 0.00 | 0.51 | 0.43 | 0 | Endothelial |
| <i>MAP4K4</i>  | 0.38 | 0.00 | 0.00 | 0.25 | 0.17 | 0 | Endothelial |
| <i>MOCS2</i>   | 0.34 | 0.00 | 0.00 | 0.25 | 0.17 | 0 | Endothelial |
| <i>HNRNPF</i>  | 0.28 | 0.00 | 0.00 | 0.42 | 0.33 | 0 | Endothelial |
| <i>AKR1A1</i>  | 0.26 | 0.00 | 0.00 | 0.55 | 0.47 | 0 | Endothelial |
| <i>EIF4G2</i>  | 0.31 | 0.00 | 0.00 | 0.49 | 0.41 | 0 | Endothelial |
| <i>ZC3H7A</i>  | 0.31 | 0.00 | 0.00 | 0.34 | 0.25 | 0 | Endothelial |
| <i>CFLAR</i>   | 0.31 | 0.00 | 0.00 | 0.26 | 0.18 | 0 | Endothelial |
| <i>C5orf24</i> | 0.33 | 0.00 | 0.00 | 0.34 | 0.25 | 0 | Endothelial |
| <i>G3BP2</i>   | 0.30 | 0.00 | 0.00 | 0.36 | 0.27 | 0 | Endothelial |
| <i>ZCRB1</i>   | 0.33 | 0.00 | 0.00 | 0.35 | 0.27 | 0 | Endothelial |
| <i>TMCO1</i>   | 0.32 | 0.00 | 0.00 | 0.37 | 0.28 | 0 | Endothelial |
| <i>GNB2</i>    | 0.30 | 0.00 | 0.00 | 0.44 | 0.37 | 0 | Endothelial |
| <i>KTN1</i>    | 0.30 | 0.00 | 0.00 | 0.45 | 0.38 | 0 | Endothelial |
| <i>ZBTB20</i>  | 0.31 | 0.00 | 0.00 | 0.34 | 0.26 | 0 | Endothelial |
| <i>CBX1</i>    | 0.29 | 0.00 | 0.00 | 0.46 | 0.39 | 0 | Endothelial |
| <i>SEPT2</i>   | 0.26 | 0.00 | 0.00 | 0.43 | 0.36 | 0 | Endothelial |
| <i>SDCBP</i>   | 0.25 | 0.00 | 0.00 | 0.35 | 0.28 | 0 | Endothelial |
| <i>SERINC1</i> | 0.26 | 0.00 | 0.00 | 0.35 | 0.28 | 0 | Endothelial |
| <i>CCDC50</i>  | 0.29 | 0.00 | 0.00 | 0.31 | 0.24 | 0 | Endothelial |
| <i>PRKAR1A</i> | 0.26 | 0.00 | 0.00 | 0.39 | 0.32 | 0 | Endothelial |
| <i>VPS36</i>   | 0.28 | 0.00 | 0.00 | 0.33 | 0.26 | 0 | Endothelial |
| <i>RAD21</i>   | 0.27 | 0.00 | 0.00 | 0.27 | 0.21 | 0 | Endothelial |
| <i>STRN3</i>   | 0.27 | 0.00 | 0.00 | 0.25 | 0.19 | 0 | Endothelial |

|                 |      |      |      |      |      |   |                   |
|-----------------|------|------|------|------|------|---|-------------------|
| <i>RSU1</i>     | 0.26 | 0.00 | 0.00 | 0.26 | 0.20 | 0 | Endothelial       |
| <i>BAZ2B</i>    | 0.25 | 0.00 | 0.00 | 0.32 | 0.27 | 0 | Endothelial       |
| <i>MFAP4</i>    | 3.12 | 0.00 | 0.00 | 0.97 | 0.14 | 1 | Matrix Fibroblast |
| <i>ADH1A</i>    | 3.02 | 0.00 | 0.00 | 0.85 | 0.04 | 1 | Matrix Fibroblast |
| <i>DPT</i>      | 2.74 | 0.00 | 0.00 | 0.76 | 0.08 | 1 | Matrix Fibroblast |
| <i>TCF21</i>    | 2.70 | 0.00 | 0.00 | 0.87 | 0.07 | 1 | Matrix Fibroblast |
| <i>LIMCH1</i>   | 2.46 | 0.00 | 0.00 | 0.94 | 0.19 | 1 | Matrix Fibroblast |
| <i>GYG1</i>     | 2.36 | 0.00 | 0.00 | 0.79 | 0.10 | 1 | Matrix Fibroblast |
| <i>CDH11</i>    | 2.28 | 0.00 | 0.00 | 0.79 | 0.10 | 1 | Matrix Fibroblast |
| <i>FMO2</i>     | 2.27 | 0.00 | 0.00 | 0.60 | 0.07 | 1 | Matrix Fibroblast |
| <i>FHL1</i>     | 2.21 | 0.00 | 0.00 | 0.91 | 0.21 | 1 | Matrix Fibroblast |
| <i>MAF</i>      | 2.20 | 0.00 | 0.00 | 0.76 | 0.08 | 1 | Matrix Fibroblast |
| <i>MACF1</i>    | 2.05 | 0.00 | 0.00 | 0.93 | 0.44 | 1 | Matrix Fibroblast |
| <i>NPNT</i>     | 2.02 | 0.00 | 0.00 | 0.77 | 0.15 | 1 | Matrix Fibroblast |
| <i>GOS2</i>     | 1.99 | 0.00 | 0.00 | 0.61 | 0.06 | 1 | Matrix Fibroblast |
| <i>INMT</i>     | 1.98 | 0.00 | 0.00 | 0.26 | 0.03 | 1 | Matrix Fibroblast |
| <i>LBH</i>      | 1.95 | 0.00 | 0.00 | 0.75 | 0.12 | 1 | Matrix Fibroblast |
| <i>ENPEP</i>    | 1.94 | 0.00 | 0.00 | 0.53 | 0.04 | 1 | Matrix Fibroblast |
| <i>NEXN</i>     | 1.93 | 0.00 | 0.00 | 0.73 | 0.13 | 1 | Matrix Fibroblast |
| <i>PCOLCE2</i>  | 1.92 | 0.00 | 0.00 | 0.50 | 0.02 | 1 | Matrix Fibroblast |
| <i>PLAC9</i>    | 1.90 | 0.00 | 0.00 | 0.88 | 0.21 | 1 | Matrix Fibroblast |
| <i>COL13A1</i>  | 1.88 | 0.00 | 0.00 | 0.52 | 0.03 | 1 | Matrix Fibroblast |
| <i>GSN</i>      | 1.88 | 0.00 | 0.00 | 0.74 | 0.17 | 1 | Matrix Fibroblast |
| <i>OGN</i>      | 1.83 | 0.00 | 0.00 | 0.60 | 0.06 | 1 | Matrix Fibroblast |
| <i>PLXDC2</i>   | 1.82 | 0.00 | 0.00 | 0.56 | 0.06 | 1 | Matrix Fibroblast |
| <i>MEOX2</i>    | 1.78 | 0.00 | 0.00 | 0.48 | 0.03 | 1 | Matrix Fibroblast |
| <i>GPX3</i>     | 1.73 | 0.00 | 0.00 | 0.50 | 0.09 | 1 | Matrix Fibroblast |
| <i>CPM</i>      | 1.70 | 0.00 | 0.00 | 0.56 | 0.10 | 1 | Matrix Fibroblast |
| <i>COLEC12</i>  | 1.65 | 0.00 | 0.00 | 0.48 | 0.05 | 1 | Matrix Fibroblast |
| <i>PTPRD</i>    | 1.63 | 0.00 | 0.00 | 0.48 | 0.05 | 1 | Matrix Fibroblast |
| <i>GPC3</i>     | 1.63 | 0.00 | 0.00 | 0.66 | 0.10 | 1 | Matrix Fibroblast |
| <i>ATP1A2</i>   | 1.59 | 0.00 | 0.00 | 0.44 | 0.04 | 1 | Matrix Fibroblast |
| <i>HSD11B1</i>  | 1.58 | 0.00 | 0.00 | 0.38 | 0.03 | 1 | Matrix Fibroblast |
| <i>SLIT2</i>    | 1.58 | 0.00 | 0.00 | 0.40 | 0.03 | 1 | Matrix Fibroblast |
| <i>CLEC3B</i>   | 1.58 | 0.00 | 0.00 | 0.38 | 0.02 | 1 | Matrix Fibroblast |
| <i>OLFML3</i>   | 1.51 | 0.00 | 0.00 | 0.42 | 0.05 | 1 | Matrix Fibroblast |
| <i>PHLDA1</i>   | 1.50 | 0.00 | 0.00 | 0.58 | 0.14 | 1 | Matrix Fibroblast |
| <i>SERPING1</i> | 1.50 | 0.00 | 0.00 | 0.53 | 0.08 | 1 | Matrix Fibroblast |
| <i>ITGA8</i>    | 1.50 | 0.00 | 0.00 | 0.44 | 0.04 | 1 | Matrix Fibroblast |
| <i>PALLD</i>    | 1.48 | 0.00 | 0.00 | 0.58 | 0.11 | 1 | Matrix Fibroblast |
| <i>MGP</i>      | 1.47 | 0.00 | 0.00 | 0.92 | 0.24 | 1 | Matrix Fibroblast |
| <i>CPED1</i>    | 1.46 | 0.00 | 0.00 | 0.41 | 0.04 | 1 | Matrix Fibroblast |
| <i>SLC38A5</i>  | 1.44 | 0.00 | 0.00 | 0.35 | 0.01 | 1 | Matrix Fibroblast |

|                        |      |      |      |      |      |   |                   |
|------------------------|------|------|------|------|------|---|-------------------|
| <i>SH3BGRL</i>         | 1.42 | 0.00 | 0.00 | 0.83 | 0.40 | 1 | Matrix Fibroblast |
| <i>SLC27A6</i>         | 1.39 | 0.00 | 0.00 | 0.29 | 0.00 | 1 | Matrix Fibroblast |
| <i>AKAP12</i>          | 1.38 | 0.00 | 0.00 | 0.64 | 0.18 | 1 | Matrix Fibroblast |
| <i>VCAM1</i>           | 1.37 | 0.00 | 0.00 | 0.32 | 0.02 | 1 | Matrix Fibroblast |
| <i>SNAI2</i>           | 1.36 | 0.00 | 0.00 | 0.42 | 0.07 | 1 | Matrix Fibroblast |
| <i>SPON1</i>           | 1.35 | 0.00 | 0.00 | 0.36 | 0.03 | 1 | Matrix Fibroblast |
| <i>MXRA8</i>           | 1.34 | 0.00 | 0.00 | 0.53 | 0.11 | 1 | Matrix Fibroblast |
| <i>RAP2A</i>           | 1.34 | 0.00 | 0.00 | 0.47 | 0.10 | 1 | Matrix Fibroblast |
| <i>WNT2</i>            | 1.34 | 0.00 | 0.00 | 0.32 | 0.02 | 1 | Matrix Fibroblast |
| <i>PPP1R14A</i>        | 1.33 | 0.00 | 0.00 | 0.40 | 0.06 | 1 | Matrix Fibroblast |
| <i>FBLIM1</i>          | 1.31 | 0.00 | 0.00 | 0.51 | 0.11 | 1 | Matrix Fibroblast |
| <i>MDK</i>             | 1.31 | 0.00 | 0.00 | 0.58 | 0.16 | 1 | Matrix Fibroblast |
| <i>COL1A2</i>          | 1.31 | 0.00 | 0.00 | 0.97 | 0.32 | 1 | Matrix Fibroblast |
| <i>NR2F2</i>           | 1.30 | 0.00 | 0.00 | 0.56 | 0.15 | 1 | Matrix Fibroblast |
| <i>DPEP1</i>           | 1.29 | 0.00 | 0.00 | 0.26 | 0.02 | 1 | Matrix Fibroblast |
| <i>CDO1</i>            | 1.28 | 0.00 | 0.00 | 0.28 | 0.03 | 1 | Matrix Fibroblast |
| <i>MYH10</i>           | 1.28 | 0.00 | 0.00 | 0.61 | 0.16 | 1 | Matrix Fibroblast |
| <i>ADARB1</i>          | 1.27 | 0.00 | 0.00 | 0.32 | 0.03 | 1 | Matrix Fibroblast |
| <i>CACNA1D</i>         | 1.27 | 0.00 | 0.00 | 0.29 | 0.02 | 1 | Matrix Fibroblast |
| <i>SPECC1L-ADORA2A</i> | 1.27 | 0.00 | 0.00 | 0.37 | 0.06 | 1 | Matrix Fibroblast |
| <i>VLDLR</i>           | 1.27 | 0.00 | 0.00 | 0.36 | 0.06 | 1 | Matrix Fibroblast |
| <i>SERPINE2</i>        | 1.27 | 0.00 | 0.00 | 0.70 | 0.18 | 1 | Matrix Fibroblast |
| <i>TNS1</i>            | 1.27 | 0.00 | 0.00 | 0.57 | 0.17 | 1 | Matrix Fibroblast |
| <i>SEPT4</i>           | 1.24 | 0.00 | 0.00 | 0.63 | 0.16 | 1 | Matrix Fibroblast |
| <i>ABLIM3</i>          | 1.23 | 0.00 | 0.00 | 0.28 | 0.02 | 1 | Matrix Fibroblast |
| <i>HIVEP3</i>          | 1.18 | 0.00 | 0.00 | 0.30 | 0.04 | 1 | Matrix Fibroblast |
| <i>ANGPT1</i>          | 1.16 | 0.00 | 0.00 | 0.31 | 0.05 | 1 | Matrix Fibroblast |
| <i>VCAN</i>            | 1.12 | 0.00 | 0.00 | 0.40 | 0.09 | 1 | Matrix Fibroblast |
| <i>EDNRA</i>           | 1.12 | 0.00 | 0.00 | 0.33 | 0.06 | 1 | Matrix Fibroblast |
| <i>TNS3</i>            | 1.12 | 0.00 | 0.00 | 0.34 | 0.07 | 1 | Matrix Fibroblast |
| <i>TMEM119</i>         | 1.10 | 0.00 | 0.00 | 0.26 | 0.02 | 1 | Matrix Fibroblast |
| <i>FXYP1</i>           | 1.09 | 0.00 | 0.00 | 0.34 | 0.06 | 1 | Matrix Fibroblast |
| <i>FIBIN</i>           | 1.09 | 0.00 | 0.00 | 0.37 | 0.07 | 1 | Matrix Fibroblast |
| <i>CDKN1C</i>          | 1.09 | 0.00 | 0.00 | 0.44 | 0.13 | 1 | Matrix Fibroblast |
| <i>MYLK</i>            | 1.08 | 0.00 | 0.00 | 0.69 | 0.23 | 1 | Matrix Fibroblast |
| <i>BGN</i>             | 1.08 | 0.00 | 0.00 | 0.67 | 0.20 | 1 | Matrix Fibroblast |
| <i>ZYX</i>             | 1.08 | 0.00 | 0.00 | 0.50 | 0.16 | 1 | Matrix Fibroblast |
| <i>TRIL</i>            | 1.07 | 0.00 | 0.00 | 0.28 | 0.04 | 1 | Matrix Fibroblast |
| <i>SELENBP1</i>        | 1.06 | 0.00 | 0.00 | 0.55 | 0.15 | 1 | Matrix Fibroblast |
| <i>COL6A1</i>          | 1.03 | 0.00 | 0.00 | 0.53 | 0.17 | 1 | Matrix Fibroblast |
| <i>LOXL1</i>           | 1.02 | 0.00 | 0.00 | 0.37 | 0.08 | 1 | Matrix Fibroblast |
| <i>GPM6B</i>           | 1.02 | 0.00 | 0.00 | 0.35 | 0.09 | 1 | Matrix Fibroblast |
| <i>NREP</i>            | 1.01 | 0.00 | 0.00 | 0.76 | 0.38 | 1 | Matrix Fibroblast |

|                 |      |      |      |      |      |   |                   |
|-----------------|------|------|------|------|------|---|-------------------|
| <i>PEG3</i>     | 0.99 | 0.00 | 0.00 | 0.54 | 0.22 | 1 | Matrix Fibroblast |
| <i>ACADSB</i>   | 0.97 | 0.00 | 0.00 | 0.31 | 0.07 | 1 | Matrix Fibroblast |
| <i>LIMD1</i>    | 0.97 | 0.00 | 0.00 | 0.38 | 0.13 | 1 | Matrix Fibroblast |
| <i>FBN1</i>     | 0.96 | 0.00 | 0.00 | 0.44 | 0.13 | 1 | Matrix Fibroblast |
| <i>TMEM176A</i> | 0.96 | 0.00 | 0.00 | 0.42 | 0.16 | 1 | Matrix Fibroblast |
| <i>NAP1L1</i>   | 0.95 | 0.00 | 0.00 | 0.72 | 0.44 | 1 | Matrix Fibroblast |
| <i>COL6A2</i>   | 0.95 | 0.00 | 0.00 | 0.45 | 0.14 | 1 | Matrix Fibroblast |
| <i>COL1A1</i>   | 0.94 | 0.00 | 0.00 | 0.77 | 0.21 | 1 | Matrix Fibroblast |
| <i>H6PD</i>     | 0.93 | 0.00 | 0.00 | 0.26 | 0.06 | 1 | Matrix Fibroblast |
| <i>TMEM254</i>  | 0.92 | 0.00 | 0.00 | 0.38 | 0.14 | 1 | Matrix Fibroblast |
| <i>CSRP1</i>    | 0.92 | 0.00 | 0.00 | 0.45 | 0.15 | 1 | Matrix Fibroblast |
| <i>AGPAT4</i>   | 0.92 | 0.00 | 0.00 | 0.33 | 0.09 | 1 | Matrix Fibroblast |
| <i>PBX1</i>     | 0.91 | 0.00 | 0.00 | 0.41 | 0.17 | 1 | Matrix Fibroblast |
| <i>PDLIM2</i>   | 0.90 | 0.00 | 0.00 | 0.41 | 0.15 | 1 | Matrix Fibroblast |
| <i>CCDC80</i>   | 0.90 | 0.00 | 0.00 | 0.34 | 0.09 | 1 | Matrix Fibroblast |
| <i>LAMB1</i>    | 0.88 | 0.00 | 0.00 | 0.37 | 0.12 | 1 | Matrix Fibroblast |
| <i>CNN2</i>     | 0.87 | 0.00 | 0.00 | 0.66 | 0.34 | 1 | Matrix Fibroblast |
| <i>ISM1</i>     | 0.87 | 0.00 | 0.00 | 0.26 | 0.06 | 1 | Matrix Fibroblast |
| <i>IGFBP4</i>   | 0.86 | 0.00 | 0.00 | 0.56 | 0.23 | 1 | Matrix Fibroblast |
| <i>EIF4EBP1</i> | 0.86 | 0.00 | 0.00 | 0.32 | 0.10 | 1 | Matrix Fibroblast |
| <i>NFIB</i>     | 0.85 | 0.00 | 0.00 | 0.77 | 0.43 | 1 | Matrix Fibroblast |
| <i>FKBP9</i>    | 0.84 | 0.00 | 0.00 | 0.33 | 0.11 | 1 | Matrix Fibroblast |
| <i>ROBO2</i>    | 0.84 | 0.00 | 0.00 | 0.27 | 0.06 | 1 | Matrix Fibroblast |
| <i>PREX2</i>    | 0.84 | 0.00 | 0.00 | 0.40 | 0.13 | 1 | Matrix Fibroblast |
| <i>TBX2</i>     | 0.83 | 0.00 | 0.00 | 0.33 | 0.11 | 1 | Matrix Fibroblast |
| <i>COL6A3</i>   | 0.83 | 0.00 | 0.00 | 0.33 | 0.10 | 1 | Matrix Fibroblast |
| <i>COL3A1</i>   | 0.82 | 0.00 | 0.00 | 0.88 | 0.27 | 1 | Matrix Fibroblast |
| <i>ADAMTS1</i>  | 0.82 | 0.00 | 0.00 | 0.42 | 0.16 | 1 | Matrix Fibroblast |
| <i>PCOLCE</i>   | 0.82 | 0.00 | 0.00 | 0.30 | 0.08 | 1 | Matrix Fibroblast |
| <i>LAMA4</i>    | 0.81 | 0.00 | 0.00 | 0.32 | 0.11 | 1 | Matrix Fibroblast |
| <i>PCDHGA9</i>  | 0.79 | 0.00 | 0.00 | 0.36 | 0.13 | 1 | Matrix Fibroblast |
| <i>FBLN5</i>    | 0.79 | 0.00 | 0.00 | 0.45 | 0.14 | 1 | Matrix Fibroblast |
| <i>CD81</i>     | 0.72 | 0.00 | 0.00 | 0.65 | 0.37 | 1 | Matrix Fibroblast |
| <i>DKK3</i>     | 0.72 | 0.00 | 0.00 | 0.32 | 0.11 | 1 | Matrix Fibroblast |
| <i>ADAMTS2</i>  | 0.67 | 0.00 | 0.00 | 0.27 | 0.08 | 1 | Matrix Fibroblast |
| <i>NEDD4</i>    | 0.64 | 0.00 | 0.00 | 0.72 | 0.46 | 1 | Matrix Fibroblast |
| <i>RARRES2</i>  | 0.64 | 0.00 | 0.00 | 0.38 | 0.13 | 1 | Matrix Fibroblast |
| <i>APOE</i>     | 0.63 | 0.00 | 0.00 | 0.56 | 0.23 | 1 | Matrix Fibroblast |
| <i>TPM1</i>     | 0.61 | 0.00 | 0.00 | 0.82 | 0.48 | 1 | Matrix Fibroblast |
| <i>RPS4X</i>    | 0.53 | 0.00 | 0.00 | 0.97 | 0.86 | 1 | Matrix Fibroblast |
| <i>SPARC</i>    | 0.51 | 0.00 | 0.00 | 0.96 | 0.73 | 1 | Matrix Fibroblast |
| <i>SPARCL1</i>  | 0.50 | 0.00 | 0.00 | 0.73 | 0.36 | 1 | Matrix Fibroblast |
| <i>LGALS1</i>   | 0.50 | 0.00 | 0.00 | 0.77 | 0.42 | 1 | Matrix Fibroblast |

|                |      |      |      |      |      |   |                   |
|----------------|------|------|------|------|------|---|-------------------|
| <i>TMSB10</i>  | 0.48 | 0.00 | 0.00 | 0.96 | 0.87 | 1 | Matrix Fibroblast |
| <i>KDELC2</i>  | 0.80 | 0.00 | 0.00 | 0.26 | 0.08 | 1 | Matrix Fibroblast |
| <i>LIMS3</i>   | 0.73 | 0.00 | 0.00 | 0.48 | 0.23 | 1 | Matrix Fibroblast |
| <i>NPR3</i>    | 0.81 | 0.00 | 0.00 | 0.28 | 0.09 | 1 | Matrix Fibroblast |
| <i>MAGED1</i>  | 0.74 | 0.00 | 0.00 | 0.37 | 0.15 | 1 | Matrix Fibroblast |
| <i>COL5A2</i>  | 0.62 | 0.00 | 0.00 | 0.38 | 0.16 | 1 | Matrix Fibroblast |
| <i>NISCH</i>   | 0.73 | 0.00 | 0.00 | 0.48 | 0.24 | 1 | Matrix Fibroblast |
| <i>COX6C</i>   | 0.54 | 0.00 | 0.00 | 0.81 | 0.65 | 1 | Matrix Fibroblast |
| <i>IGFBP7</i>  | 0.28 | 0.00 | 0.00 | 0.69 | 0.39 | 1 | Matrix Fibroblast |
| <i>SH3BP5</i>  | 0.63 | 0.00 | 0.00 | 0.39 | 0.17 | 1 | Matrix Fibroblast |
| <i>PRDX5</i>   | 0.51 | 0.00 | 0.00 | 0.54 | 0.30 | 1 | Matrix Fibroblast |
| <i>RBMS3</i>   | 0.70 | 0.00 | 0.00 | 0.35 | 0.15 | 1 | Matrix Fibroblast |
| <i>LRP1</i>    | 0.68 | 0.00 | 0.00 | 0.28 | 0.10 | 1 | Matrix Fibroblast |
| <i>MBNL2</i>   | 0.67 | 0.00 | 0.00 | 0.52 | 0.30 | 1 | Matrix Fibroblast |
| <i>CRYAB</i>   | 0.54 | 0.00 | 0.00 | 0.33 | 0.13 | 1 | Matrix Fibroblast |
| <i>LMO4</i>    | 0.64 | 0.00 | 0.00 | 0.45 | 0.23 | 1 | Matrix Fibroblast |
| <i>N6AMT1</i>  | 0.72 | 0.00 | 0.00 | 0.26 | 0.09 | 1 | Matrix Fibroblast |
| <i>NENF</i>    | 0.74 | 0.00 | 0.00 | 0.37 | 0.17 | 1 | Matrix Fibroblast |
| <i>FGFR1</i>   | 0.72 | 0.00 | 0.00 | 0.25 | 0.09 | 1 | Matrix Fibroblast |
| <i>SOCS2</i>   | 0.57 | 0.00 | 0.00 | 0.53 | 0.29 | 1 | Matrix Fibroblast |
| <i>MFAP2</i>   | 0.50 | 0.00 | 0.00 | 0.58 | 0.32 | 1 | Matrix Fibroblast |
| <i>TAGLN2</i>  | 0.53 | 0.00 | 0.00 | 0.66 | 0.44 | 1 | Matrix Fibroblast |
| <i>TACC1</i>   | 0.69 | 0.00 | 0.00 | 0.41 | 0.21 | 1 | Matrix Fibroblast |
| <i>NID1</i>    | 0.59 | 0.00 | 0.00 | 0.42 | 0.20 | 1 | Matrix Fibroblast |
| <i>LTBP4</i>   | 0.61 | 0.00 | 0.00 | 0.26 | 0.10 | 1 | Matrix Fibroblast |
| <i>ZFP36L1</i> | 0.64 | 0.00 | 0.00 | 0.64 | 0.44 | 1 | Matrix Fibroblast |
| <i>CELF2</i>   | 0.57 | 0.00 | 0.00 | 0.45 | 0.24 | 1 | Matrix Fibroblast |
| <i>PLTP</i>    | 0.58 | 0.00 | 0.00 | 0.34 | 0.15 | 1 | Matrix Fibroblast |
| <i>EVA1B</i>   | 0.61 | 0.00 | 0.00 | 0.36 | 0.18 | 1 | Matrix Fibroblast |
| <i>IGF1</i>    | 0.43 | 0.00 | 0.00 | 0.29 | 0.11 | 1 | Matrix Fibroblast |
| <i>CD302</i>   | 0.56 | 0.00 | 0.00 | 0.29 | 0.12 | 1 | Matrix Fibroblast |
| <i>S100A1</i>  | 0.61 | 0.00 | 0.00 | 0.26 | 0.11 | 1 | Matrix Fibroblast |
| <i>CBX5</i>    | 0.61 | 0.00 | 0.00 | 0.40 | 0.21 | 1 | Matrix Fibroblast |
| <i>GNG11</i>   | 0.41 | 0.00 | 0.00 | 0.51 | 0.29 | 1 | Matrix Fibroblast |
| <i>RCN3</i>    | 0.52 | 0.00 | 0.00 | 0.27 | 0.11 | 1 | Matrix Fibroblast |
| <i>SCP2</i>    | 0.56 | 0.00 | 0.00 | 0.49 | 0.31 | 1 | Matrix Fibroblast |
| <i>GNAS</i>    | 0.34 | 0.00 | 0.00 | 0.79 | 0.64 | 1 | Matrix Fibroblast |
| <i>ALDH2</i>   | 0.53 | 0.00 | 0.00 | 0.48 | 0.30 | 1 | Matrix Fibroblast |
| <i>IFRD1</i>   | 0.66 | 0.00 | 0.00 | 0.27 | 0.13 | 1 | Matrix Fibroblast |
| <i>ZMYND11</i> | 0.54 | 0.00 | 0.00 | 0.47 | 0.28 | 1 | Matrix Fibroblast |
| <i>FKBP7</i>   | 0.54 | 0.00 | 0.00 | 0.27 | 0.12 | 1 | Matrix Fibroblast |
| <i>SLC25A4</i> | 0.43 | 0.00 | 0.00 | 0.63 | 0.45 | 1 | Matrix Fibroblast |
| <i>TIMP2</i>   | 0.52 | 0.00 | 0.00 | 0.37 | 0.20 | 1 | Matrix Fibroblast |

|                 |      |      |      |      |      |   |                   |
|-----------------|------|------|------|------|------|---|-------------------|
| <i>ECH1</i>     | 0.61 | 0.00 | 0.00 | 0.31 | 0.15 | 1 | Matrix Fibroblast |
| <i>TSPAN3</i>   | 0.56 | 0.00 | 0.00 | 0.30 | 0.15 | 1 | Matrix Fibroblast |
| <i>TMEM176B</i> | 0.55 | 0.00 | 0.00 | 0.48 | 0.30 | 1 | Matrix Fibroblast |
| <i>GTF2H5</i>   | 0.54 | 0.00 | 0.00 | 0.42 | 0.26 | 1 | Matrix Fibroblast |
| <i>NFIA</i>     | 0.56 | 0.00 | 0.00 | 0.39 | 0.22 | 1 | Matrix Fibroblast |
| <i>ELN</i>      | 0.33 | 0.00 | 0.00 | 0.33 | 0.16 | 1 | Matrix Fibroblast |
| <i>HMGN1</i>    | 0.46 | 0.00 | 0.00 | 0.60 | 0.44 | 1 | Matrix Fibroblast |
| <i>SERPINH1</i> | 0.38 | 0.00 | 0.00 | 0.59 | 0.39 | 1 | Matrix Fibroblast |
| <i>BLMH</i>     | 0.53 | 0.00 | 0.00 | 0.29 | 0.15 | 1 | Matrix Fibroblast |
| <i>THRA</i>     | 0.54 | 0.00 | 0.00 | 0.29 | 0.15 | 1 | Matrix Fibroblast |
| <i>LIMA1</i>    | 0.53 | 0.00 | 0.00 | 0.27 | 0.13 | 1 | Matrix Fibroblast |
| <i>YWHAQ</i>    | 0.49 | 0.00 | 0.00 | 0.52 | 0.37 | 1 | Matrix Fibroblast |
| <i>HMG5</i>     | 0.66 | 0.00 | 0.00 | 0.36 | 0.21 | 1 | Matrix Fibroblast |
| <i>SQSTM1</i>   | 0.47 | 0.00 | 0.00 | 0.45 | 0.30 | 1 | Matrix Fibroblast |
| <i>EID1</i>     | 0.45 | 0.00 | 0.00 | 0.46 | 0.31 | 1 | Matrix Fibroblast |
| <i>RAD50</i>    | 0.54 | 0.00 | 0.00 | 0.29 | 0.16 | 1 | Matrix Fibroblast |
| <i>HSPB1</i>    | 0.37 | 0.00 | 0.00 | 0.29 | 0.16 | 1 | Matrix Fibroblast |
| <i>MAGED2</i>   | 0.44 | 0.00 | 0.00 | 0.33 | 0.19 | 1 | Matrix Fibroblast |
| <i>SUB1</i>     | 0.34 | 0.00 | 0.00 | 0.64 | 0.50 | 1 | Matrix Fibroblast |
| <i>FLNA</i>     | 0.38 | 0.00 | 0.00 | 0.38 | 0.23 | 1 | Matrix Fibroblast |
| <i>COX7C</i>    | 0.34 | 0.00 | 0.00 | 0.74 | 0.63 | 1 | Matrix Fibroblast |
| <i>RALB</i>     | 0.48 | 0.00 | 0.00 | 0.31 | 0.18 | 1 | Matrix Fibroblast |
| <i>CD63</i>     | 0.27 | 0.00 | 0.00 | 0.50 | 0.32 | 1 | Matrix Fibroblast |
| <i>SEPT7</i>    | 0.32 | 0.00 | 0.00 | 0.70 | 0.58 | 1 | Matrix Fibroblast |
| <i>LAMC1</i>    | 0.46 | 0.00 | 0.00 | 0.27 | 0.14 | 1 | Matrix Fibroblast |
| <i>RPL23A</i>   | 0.33 | 0.00 | 0.00 | 0.80 | 0.68 | 1 | Matrix Fibroblast |
| <i>MYO1B</i>    | 0.49 | 0.00 | 0.00 | 0.26 | 0.15 | 1 | Matrix Fibroblast |
| <i>TGFB11</i>   | 0.41 | 0.00 | 0.00 | 0.26 | 0.14 | 1 | Matrix Fibroblast |
| <i>PPIC</i>     | 0.34 | 0.00 | 0.00 | 0.51 | 0.37 | 1 | Matrix Fibroblast |
| <i>IDH2</i>     | 0.46 | 0.00 | 0.00 | 0.30 | 0.18 | 1 | Matrix Fibroblast |
| <i>COX6A1</i>   | 0.34 | 0.00 | 0.00 | 0.66 | 0.55 | 1 | Matrix Fibroblast |
| <i>PDCD4</i>    | 0.34 | 0.00 | 0.00 | 0.32 | 0.19 | 1 | Matrix Fibroblast |
| <i>WSB1</i>     | 0.41 | 0.00 | 0.00 | 0.35 | 0.22 | 1 | Matrix Fibroblast |
| <i>CLIC4</i>    | 0.35 | 0.00 | 0.00 | 0.41 | 0.28 | 1 | Matrix Fibroblast |
| <i>MMP14</i>    | 0.35 | 0.00 | 0.00 | 0.36 | 0.23 | 1 | Matrix Fibroblast |
| <i>PLS3</i>     | 0.39 | 0.00 | 0.00 | 0.32 | 0.20 | 1 | Matrix Fibroblast |
| <i>NFIX</i>     | 0.42 | 0.00 | 0.00 | 0.26 | 0.15 | 1 | Matrix Fibroblast |
| <i>COX8A</i>    | 0.30 | 0.00 | 0.00 | 0.65 | 0.55 | 1 | Matrix Fibroblast |
| <i>TCF12</i>    | 0.43 | 0.00 | 0.00 | 0.25 | 0.15 | 1 | Matrix Fibroblast |
| <i>TMEM204</i>  | 0.34 | 0.00 | 0.00 | 0.26 | 0.15 | 1 | Matrix Fibroblast |
| <i>SEC61B</i>   | 0.34 | 0.00 | 0.00 | 0.58 | 0.47 | 1 | Matrix Fibroblast |
| <i>SFR1</i>     | 0.38 | 0.00 | 0.00 | 0.41 | 0.29 | 1 | Matrix Fibroblast |
| <i>NKTR</i>     | 0.38 | 0.00 | 0.00 | 0.46 | 0.34 | 1 | Matrix Fibroblast |

|                       |      |      |      |      |      |   |                   |
|-----------------------|------|------|------|------|------|---|-------------------|
| <i>CNPY2</i>          | 0.40 | 0.00 | 0.00 | 0.30 | 0.19 | 1 | Matrix Fibroblast |
| <i>KIF1B</i>          | 0.41 | 0.00 | 0.00 | 0.31 | 0.20 | 1 | Matrix Fibroblast |
| <i>CKAP4</i>          | 0.37 | 0.00 | 0.00 | 0.27 | 0.17 | 1 | Matrix Fibroblast |
| <i>MPC2</i>           | 0.37 | 0.00 | 0.00 | 0.33 | 0.22 | 1 | Matrix Fibroblast |
| <i>SLC25A5</i>        | 0.29 | 0.00 | 0.00 | 0.66 | 0.57 | 1 | Matrix Fibroblast |
| <i>HSPA5</i>          | 0.30 | 0.00 | 0.00 | 0.63 | 0.54 | 1 | Matrix Fibroblast |
| <i>NDUFB9</i>         | 0.34 | 0.00 | 0.00 | 0.47 | 0.36 | 1 | Matrix Fibroblast |
| <i>DRAP1</i>          | 0.50 | 0.00 | 0.00 | 0.34 | 0.24 | 1 | Matrix Fibroblast |
| <i>SMIM15</i>         | 0.38 | 0.00 | 0.00 | 0.28 | 0.17 | 1 | Matrix Fibroblast |
| <i>ENY2</i>           | 0.40 | 0.00 | 0.00 | 0.33 | 0.23 | 1 | Matrix Fibroblast |
| <i>ATXN7L3B</i>       | 0.32 | 0.00 | 0.00 | 0.48 | 0.36 | 1 | Matrix Fibroblast |
| <i>TBL1X</i>          | 0.36 | 0.00 | 0.00 | 0.32 | 0.22 | 1 | Matrix Fibroblast |
| <i>DNAJA1</i>         | 0.30 | 0.00 | 0.00 | 0.59 | 0.50 | 1 | Matrix Fibroblast |
| <i>NDUFA4</i>         | 0.27 | 0.00 | 0.00 | 0.65 | 0.56 | 1 | Matrix Fibroblast |
| <i>TSC22D1</i>        | 0.27 | 0.00 | 0.00 | 0.46 | 0.34 | 1 | Matrix Fibroblast |
| <i>SEC61G</i>         | 0.34 | 0.00 | 0.00 | 0.46 | 0.36 | 1 | Matrix Fibroblast |
| <i>ANXA6</i>          | 0.32 | 0.00 | 0.00 | 0.31 | 0.21 | 1 | Matrix Fibroblast |
| <i>MPRIP</i>          | 0.37 | 0.00 | 0.00 | 0.28 | 0.19 | 1 | Matrix Fibroblast |
| <i>CCND2</i>          | 0.25 | 0.00 | 0.00 | 0.37 | 0.26 | 1 | Matrix Fibroblast |
| <i>MORF4L1</i>        | 0.27 | 0.00 | 0.00 | 0.64 | 0.55 | 1 | Matrix Fibroblast |
| <i>MRFAP1</i>         | 0.31 | 0.00 | 0.00 | 0.44 | 0.34 | 1 | Matrix Fibroblast |
| <i>SSR1</i>           | 0.33 | 0.00 | 0.00 | 0.33 | 0.23 | 1 | Matrix Fibroblast |
| <i>EIF3E</i>          | 0.31 | 0.00 | 0.00 | 0.52 | 0.42 | 1 | Matrix Fibroblast |
| <i>MAP1LC3B</i>       | 0.34 | 0.00 | 0.00 | 0.47 | 0.37 | 1 | Matrix Fibroblast |
| <i>NDUFC1</i>         | 0.32 | 0.00 | 0.00 | 0.39 | 0.30 | 1 | Matrix Fibroblast |
| <i>EIF4A2</i>         | 0.27 | 0.00 | 0.00 | 0.44 | 0.34 | 1 | Matrix Fibroblast |
| <i>LUC7L2</i>         | 0.33 | 0.00 | 0.00 | 0.45 | 0.36 | 1 | Matrix Fibroblast |
| <i>RPL24</i>          | 0.31 | 0.00 | 0.00 | 0.58 | 0.48 | 1 | Matrix Fibroblast |
| <i>SWI5</i>           | 0.33 | 0.00 | 0.00 | 0.32 | 0.23 | 1 | Matrix Fibroblast |
| <i>HSBP1</i>          | 0.30 | 0.00 | 0.00 | 0.41 | 0.32 | 1 | Matrix Fibroblast |
| <i>NDUFB11</i>        | 0.30 | 0.00 | 0.00 | 0.43 | 0.34 | 1 | Matrix Fibroblast |
| <i>UQCRB</i>          | 0.26 | 0.00 | 0.00 | 0.55 | 0.46 | 1 | Matrix Fibroblast |
| <i>HTATSF1</i>        | 0.36 | 0.00 | 0.00 | 0.32 | 0.24 | 1 | Matrix Fibroblast |
| <i>RBBP7</i>          | 0.32 | 0.00 | 0.00 | 0.32 | 0.24 | 1 | Matrix Fibroblast |
| <i>IER3IP1</i>        | 0.30 | 0.00 | 0.00 | 0.38 | 0.29 | 1 | Matrix Fibroblast |
| <i>NDUFB3</i>         | 0.31 | 0.00 | 0.00 | 0.39 | 0.30 | 1 | Matrix Fibroblast |
| <i>LAMP2</i>          | 0.32 | 0.00 | 0.00 | 0.33 | 0.24 | 1 | Matrix Fibroblast |
| <i>ROMO1</i>          | 0.26 | 0.00 | 0.00 | 0.39 | 0.30 | 1 | Matrix Fibroblast |
| <i>NR3C1</i>          | 0.31 | 0.00 | 0.00 | 0.33 | 0.25 | 1 | Matrix Fibroblast |
| <i>NDUFA7</i>         | 0.27 | 0.00 | 0.00 | 0.42 | 0.34 | 1 | Matrix Fibroblast |
| <i>RPL17-C18orf32</i> | 0.29 | 0.00 | 0.00 | 0.38 | 0.30 | 1 | Matrix Fibroblast |
| <i>NDUFB6</i>         | 0.28 | 0.00 | 0.00 | 0.30 | 0.23 | 1 | Matrix Fibroblast |
| <i>ANAPC13</i>        | 0.30 | 0.00 | 0.00 | 0.27 | 0.20 | 1 | Matrix Fibroblast |

|                 |      |      |      |      |      |   |                   |
|-----------------|------|------|------|------|------|---|-------------------|
| <i>NDUFA5</i>   | 0.28 | 0.00 | 0.00 | 0.33 | 0.26 | 1 | Matrix Fibroblast |
| <i>ZBTB20</i>   | 0.26 | 0.00 | 0.00 | 0.34 | 0.26 | 1 | Matrix Fibroblast |
| <i>PDCD5</i>    | 0.28 | 0.00 | 0.00 | 0.34 | 0.27 | 1 | Matrix Fibroblast |
| <i>ILK</i>      | 0.29 | 0.00 | 0.00 | 0.30 | 0.23 | 1 | Matrix Fibroblast |
| <i>H2AFV</i>    | 0.27 | 0.00 | 0.00 | 0.33 | 0.25 | 1 | Matrix Fibroblast |
| <i>COMMD1</i>   | 0.26 | 0.00 | 0.00 | 0.26 | 0.19 | 1 | Matrix Fibroblast |
| <i>ING4</i>     | 0.26 | 0.00 | 0.00 | 0.27 | 0.20 | 1 | Matrix Fibroblast |
| <i>PSMC5</i>    | 0.26 | 0.00 | 0.00 | 0.29 | 0.23 | 1 | Matrix Fibroblast |
| <i>HBA2</i>     | 0.39 | 0.00 | 0.00 | 0.68 | 0.64 | 1 | Matrix Fibroblast |
| <i>ARID5B</i>   | 0.30 | 0.00 | 0.00 | 0.28 | 0.22 | 1 | Matrix Fibroblast |
| <i>AAMP</i>     | 0.26 | 0.00 | 0.00 | 0.27 | 0.21 | 1 | Matrix Fibroblast |
| <i>C19orf70</i> | 0.26 | 0.00 | 0.00 | 0.29 | 0.23 | 1 | Matrix Fibroblast |
| <i>PSMC1</i>    | 0.26 | 0.00 | 0.00 | 0.37 | 0.30 | 1 | Matrix Fibroblast |
| <i>NDUFB4</i>   | 0.27 | 0.00 | 0.00 | 0.32 | 0.25 | 1 | Matrix Fibroblast |
| <i>THOC2</i>    | 0.26 | 0.00 | 0.00 | 0.38 | 0.31 | 1 | Matrix Fibroblast |
| <i>TBRG1</i>    | 0.26 | 0.00 | 0.00 | 0.34 | 0.28 | 1 | Matrix Fibroblast |
| <i>PPP1R2</i>   | 0.33 | 0.00 | 0.00 | 0.28 | 0.24 | 1 | Matrix Fibroblast |
| <i>SFTPC</i>    | 4.04 | 0.00 | 0.00 | 0.97 | 0.54 | 2 | AT2 Cell          |
| <i>SFTPA2</i>   | 3.82 | 0.00 | 0.00 | 0.97 | 0.11 | 2 | AT2 Cell          |
| <i>SFTPB</i>    | 3.54 | 0.00 | 0.00 | 0.97 | 0.08 | 2 | AT2 Cell          |
| <i>SLC34A2</i>  | 3.34 | 0.00 | 0.00 | 0.94 | 0.06 | 2 | AT2 Cell          |
| <i>SFTPD</i>    | 3.12 | 0.00 | 0.00 | 0.95 | 0.06 | 2 | AT2 Cell          |
| <i>S100G</i>    | 2.85 | 0.00 | 0.00 | 0.81 | 0.04 | 2 | AT2 Cell          |
| <i>WFDC2</i>    | 2.74 | 0.00 | 0.00 | 0.89 | 0.06 | 2 | AT2 Cell          |
| <i>SFTA2</i>    | 2.54 | 0.00 | 0.00 | 0.88 | 0.05 | 2 | AT2 Cell          |
| <i>LPCAT1</i>   | 2.44 | 0.00 | 0.00 | 0.85 | 0.10 | 2 | AT2 Cell          |
| <i>BEX2</i>     | 2.44 | 0.00 | 0.00 | 0.65 | 0.03 | 2 | AT2 Cell          |
| <i>PPP1R14C</i> | 2.33 | 0.00 | 0.00 | 0.70 | 0.03 | 2 | AT2 Cell          |
| <i>NAPSA</i>    | 2.32 | 0.00 | 0.00 | 0.87 | 0.12 | 2 | AT2 Cell          |
| <i>SPINK5</i>   | 2.31 | 0.00 | 0.00 | 0.51 | 0.02 | 2 | AT2 Cell          |
| <i>NPC2</i>     | 2.27 | 0.00 | 0.00 | 0.99 | 0.49 | 2 | AT2 Cell          |
| <i>DRAM1</i>    | 2.22 | 0.00 | 0.00 | 0.73 | 0.05 | 2 | AT2 Cell          |
| <i>ABCA3</i>    | 2.01 | 0.00 | 0.00 | 0.66 | 0.05 | 2 | AT2 Cell          |
| <i>CTSH</i>     | 1.93 | 0.00 | 0.00 | 0.76 | 0.14 | 2 | AT2 Cell          |
| <i>ATP1B1</i>   | 1.91 | 0.00 | 0.00 | 0.79 | 0.11 | 2 | AT2 Cell          |
| <i>LGI3</i>     | 1.89 | 0.00 | 0.00 | 0.54 | 0.02 | 2 | AT2 Cell          |
| <i>RBPJL</i>    | 1.78 | 0.00 | 0.00 | 0.45 | 0.02 | 2 | AT2 Cell          |
| <i>DLK1</i>     | 1.74 | 0.00 | 0.00 | 0.34 | 0.03 | 2 | AT2 Cell          |
| <i>FABP5</i>    | 1.70 | 0.00 | 0.00 | 0.59 | 0.09 | 2 | AT2 Cell          |
| <i>EGFL6</i>    | 1.70 | 0.00 | 0.00 | 0.60 | 0.05 | 2 | AT2 Cell          |
| <i>ALCAM</i>    | 1.70 | 0.00 | 0.00 | 0.79 | 0.14 | 2 | AT2 Cell          |
| <i>SDC4</i>     | 1.69 | 0.00 | 0.00 | 0.73 | 0.14 | 2 | AT2 Cell          |
| <i>PI4K2B</i>   | 1.66 | 0.00 | 0.00 | 0.50 | 0.04 | 2 | AT2 Cell          |

|                 |      |      |      |      |      |   |          |
|-----------------|------|------|------|------|------|---|----------|
| <i>CLDN3</i>    | 1.62 | 0.00 | 0.00 | 0.57 | 0.05 | 2 | AT2 Cell |
| <i>DCXR</i>     | 1.62 | 0.00 | 0.00 | 0.51 | 0.06 | 2 | AT2 Cell |
| <i>PTPRF</i>    | 1.61 | 0.00 | 0.00 | 0.63 | 0.09 | 2 | AT2 Cell |
| <i>MGST1</i>    | 1.59 | 0.00 | 0.00 | 0.67 | 0.12 | 2 | AT2 Cell |
| <i>ANK3</i>     | 1.52 | 0.00 | 0.00 | 0.42 | 0.03 | 2 | AT2 Cell |
| <i>ACSL4</i>    | 1.48 | 0.00 | 0.00 | 0.49 | 0.07 | 2 | AT2 Cell |
| <i>ETV5</i>     | 1.47 | 0.00 | 0.00 | 0.40 | 0.03 | 2 | AT2 Cell |
| <i>ATP6V1C2</i> | 1.45 | 0.00 | 0.00 | 0.36 | 0.01 | 2 | AT2 Cell |
| <i>FASN</i>     | 1.44 | 0.00 | 0.00 | 0.40 | 0.03 | 2 | AT2 Cell |
| <i>MID1IP1</i>  | 1.44 | 0.00 | 0.00 | 0.49 | 0.10 | 2 | AT2 Cell |
| <i>PLA2G1B</i>  | 1.43 | 0.00 | 0.00 | 0.36 | 0.01 | 2 | AT2 Cell |
| <i>RNASE4</i>   | 1.43 | 0.00 | 0.00 | 0.57 | 0.12 | 2 | AT2 Cell |
| <i>PPP1R9A</i>  | 1.42 | 0.00 | 0.00 | 0.51 | 0.09 | 2 | AT2 Cell |
| <i>IRX3</i>     | 1.41 | 0.00 | 0.00 | 0.39 | 0.03 | 2 | AT2 Cell |
| <i>NKX2-1</i>   | 1.40 | 0.00 | 0.00 | 0.48 | 0.04 | 2 | AT2 Cell |
| <i>ABCD3</i>    | 1.40 | 0.00 | 0.00 | 0.58 | 0.13 | 2 | AT2 Cell |
| <i>MYO5C</i>    | 1.39 | 0.00 | 0.00 | 0.39 | 0.03 | 2 | AT2 Cell |
| <i>EPCAM</i>    | 1.39 | 0.00 | 0.00 | 0.46 | 0.04 | 2 | AT2 Cell |
| <i>IL33</i>     | 1.37 | 0.00 | 0.00 | 0.28 | 0.02 | 2 | AT2 Cell |
| <i>CHCHD10</i>  | 1.37 | 0.00 | 0.00 | 0.51 | 0.08 | 2 | AT2 Cell |
| <i>ATP8A1</i>   | 1.35 | 0.00 | 0.00 | 0.54 | 0.09 | 2 | AT2 Cell |
| <i>FGFR2</i>    | 1.30 | 0.00 | 0.00 | 0.36 | 0.03 | 2 | AT2 Cell |
| <i>ZDHHC3</i>   | 1.28 | 0.00 | 0.00 | 0.51 | 0.11 | 2 | AT2 Cell |
| <i>TGOLN2</i>   | 1.27 | 0.00 | 0.00 | 0.53 | 0.15 | 2 | AT2 Cell |
| <i>GCLC</i>     | 1.24 | 0.00 | 0.00 | 0.34 | 0.05 | 2 | AT2 Cell |
| <i>EXOSC7</i>   | 1.23 | 0.00 | 0.00 | 0.44 | 0.09 | 2 | AT2 Cell |
| <i>MT1M</i>     | 1.22 | 0.00 | 0.00 | 0.26 | 0.03 | 2 | AT2 Cell |
| <i>CLDN18</i>   | 1.21 | 0.00 | 0.00 | 0.80 | 0.09 | 2 | AT2 Cell |
| <i>ERRFI1</i>   | 1.21 | 0.00 | 0.00 | 0.34 | 0.06 | 2 | AT2 Cell |
| <i>SPINT2</i>   | 1.19 | 0.00 | 0.00 | 0.44 | 0.07 | 2 | AT2 Cell |
| <i>NUPR1</i>    | 1.18 | 0.00 | 0.00 | 0.46 | 0.18 | 2 | AT2 Cell |
| <i>PRR15L</i>   | 1.18 | 0.00 | 0.00 | 0.30 | 0.02 | 2 | AT2 Cell |
| <i>TFCP2L1</i>  | 1.16 | 0.00 | 0.00 | 0.26 | 0.01 | 2 | AT2 Cell |
| <i>TMEM243</i>  | 1.15 | 0.00 | 0.00 | 0.33 | 0.06 | 2 | AT2 Cell |
| <i>SCD</i>      | 1.14 | 0.00 | 0.00 | 0.56 | 0.16 | 2 | AT2 Cell |
| <i>ATP11A</i>   | 1.13 | 0.00 | 0.00 | 0.39 | 0.07 | 2 | AT2 Cell |
| <i>SOAT1</i>    | 1.12 | 0.00 | 0.00 | 0.38 | 0.07 | 2 | AT2 Cell |
| <i>BRD7</i>     | 1.11 | 0.00 | 0.00 | 0.60 | 0.21 | 2 | AT2 Cell |
| <i>CDH1</i>     | 1.10 | 0.00 | 0.00 | 0.32 | 0.03 | 2 | AT2 Cell |
| <i>NUCB2</i>    | 1.09 | 0.00 | 0.00 | 0.47 | 0.13 | 2 | AT2 Cell |
| <i>CEBPA</i>    | 1.09 | 0.00 | 0.00 | 0.28 | 0.02 | 2 | AT2 Cell |
| <i>H2AFJ</i>    | 1.07 | 0.00 | 0.00 | 0.67 | 0.28 | 2 | AT2 Cell |
| <i>CTSC</i>     | 1.07 | 0.00 | 0.00 | 0.56 | 0.16 | 2 | AT2 Cell |

|                  |      |      |      |      |      |   |          |
|------------------|------|------|------|------|------|---|----------|
| <i>IRX1</i>      | 1.06 | 0.00 | 0.00 | 0.26 | 0.02 | 2 | AT2 Cell |
| <i>CMTM8</i>     | 1.05 | 0.00 | 0.00 | 0.40 | 0.08 | 2 | AT2 Cell |
| <i>GDE1</i>      | 1.05 | 0.00 | 0.00 | 0.44 | 0.11 | 2 | AT2 Cell |
| <i>LPIN2</i>     | 1.05 | 0.00 | 0.00 | 0.40 | 0.10 | 2 | AT2 Cell |
| <i>SLC12A2</i>   | 1.04 | 0.00 | 0.00 | 0.45 | 0.11 | 2 | AT2 Cell |
| <i>CCZ1B</i>     | 1.04 | 0.00 | 0.00 | 0.32 | 0.10 | 2 | AT2 Cell |
| <i>CLDN7</i>     | 1.04 | 0.00 | 0.00 | 0.33 | 0.04 | 2 | AT2 Cell |
| <i>MECOM</i>     | 1.04 | 0.00 | 0.00 | 0.35 | 0.07 | 2 | AT2 Cell |
| <i>GAS6</i>      | 1.04 | 0.00 | 0.00 | 0.45 | 0.12 | 2 | AT2 Cell |
| <i>SNX25</i>     | 1.02 | 0.00 | 0.00 | 0.26 | 0.03 | 2 | AT2 Cell |
| <i>MBIP</i>      | 1.01 | 0.00 | 0.00 | 0.38 | 0.08 | 2 | AT2 Cell |
| <i>RAB27B</i>    | 0.96 | 0.00 | 0.00 | 0.28 | 0.04 | 2 | AT2 Cell |
| <i>UHRF1BP1L</i> | 0.96 | 0.00 | 0.00 | 0.31 | 0.06 | 2 | AT2 Cell |
| <i>TAOK3</i>     | 0.95 | 0.00 | 0.00 | 0.47 | 0.15 | 2 | AT2 Cell |
| <i>RAI14</i>     | 0.94 | 0.00 | 0.00 | 0.34 | 0.08 | 2 | AT2 Cell |
| <i>CHKA</i>      | 0.93 | 0.00 | 0.00 | 0.32 | 0.06 | 2 | AT2 Cell |
| <i>AVPI1</i>     | 0.90 | 0.00 | 0.00 | 0.29 | 0.05 | 2 | AT2 Cell |
| <i>VAMP8</i>     | 0.89 | 0.00 | 0.00 | 0.66 | 0.29 | 2 | AT2 Cell |
| <i>SWT1</i>      | 0.88 | 0.00 | 0.00 | 0.37 | 0.11 | 2 | AT2 Cell |
| <i>SLC39A8</i>   | 0.84 | 0.00 | 0.00 | 0.29 | 0.05 | 2 | AT2 Cell |
| <i>NPC1</i>      | 0.84 | 0.00 | 0.00 | 0.28 | 0.06 | 2 | AT2 Cell |
| <i>SECISBP2L</i> | 0.83 | 0.00 | 0.00 | 0.41 | 0.15 | 2 | AT2 Cell |
| <i>BRI3</i>      | 0.83 | 0.00 | 0.00 | 0.46 | 0.18 | 2 | AT2 Cell |
| <i>PON3</i>      | 0.82 | 0.00 | 0.00 | 0.30 | 0.07 | 2 | AT2 Cell |
| <i>CADM1</i>     | 0.82 | 0.00 | 0.00 | 0.41 | 0.11 | 2 | AT2 Cell |
| <i>MYH14</i>     | 0.82 | 0.00 | 0.00 | 0.32 | 0.06 | 2 | AT2 Cell |
| <i>TMEM245</i>   | 0.78 | 0.00 | 0.00 | 0.29 | 0.08 | 2 | AT2 Cell |
| <i>DPP4</i>      | 0.75 | 0.00 | 0.00 | 0.36 | 0.10 | 2 | AT2 Cell |
| <i>KRT18</i>     | 0.74 | 0.00 | 0.00 | 0.27 | 0.06 | 2 | AT2 Cell |
| <i>ARL6IP1</i>   | 0.74 | 0.00 | 0.00 | 0.76 | 0.46 | 2 | AT2 Cell |
| <i>CYSTM1</i>    | 0.74 | 0.00 | 0.00 | 0.28 | 0.07 | 2 | AT2 Cell |
| <i>EMB</i>       | 0.67 | 0.00 | 0.00 | 0.30 | 0.08 | 2 | AT2 Cell |
| <i>IQGAP1</i>    | 0.66 | 0.00 | 0.00 | 0.73 | 0.39 | 2 | AT2 Cell |
| <i>AGER</i>      | 0.63 | 0.00 | 0.00 | 0.71 | 0.10 | 2 | AT2 Cell |
| <i>CLIC3</i>     | 0.53 | 0.00 | 0.00 | 0.27 | 0.06 | 2 | AT2 Cell |
| <i>ACSL5</i>     | 0.72 | 0.00 | 0.00 | 0.28 | 0.08 | 2 | AT2 Cell |
| <i>CD36</i>      | 0.45 | 0.00 | 0.00 | 0.65 | 0.29 | 2 | AT2 Cell |
| <i>ITGA9</i>     | 0.78 | 0.00 | 0.00 | 0.27 | 0.07 | 2 | AT2 Cell |
| <i>PRNP</i>      | 0.80 | 0.00 | 0.00 | 0.34 | 0.11 | 2 | AT2 Cell |
| <i>CPM</i>       | 0.55 | 0.00 | 0.00 | 0.40 | 0.14 | 2 | AT2 Cell |
| <i>ATP13A3</i>   | 0.65 | 0.00 | 0.00 | 0.25 | 0.07 | 2 | AT2 Cell |
| <i>CD74</i>      | 0.27 | 0.00 | 0.00 | 0.37 | 0.13 | 2 | AT2 Cell |
| <i>LDHB</i>      | 0.69 | 0.00 | 0.00 | 0.29 | 0.09 | 2 | AT2 Cell |

|                      |      |      |      |      |      |   |          |
|----------------------|------|------|------|------|------|---|----------|
| <i>EZR</i>           | 0.57 | 0.00 | 0.00 | 0.44 | 0.18 | 2 | AT2 Cell |
| <i>SELENBP1</i>      | 0.73 | 0.00 | 0.00 | 0.43 | 0.18 | 2 | AT2 Cell |
| <i>PCNT</i>          | 0.75 | 0.00 | 0.00 | 0.29 | 0.10 | 2 | AT2 Cell |
| <i>DAPK1</i>         | 0.65 | 0.00 | 0.00 | 0.26 | 0.08 | 2 | AT2 Cell |
| <i>ADK</i>           | 0.67 | 0.00 | 0.00 | 0.29 | 0.09 | 2 | AT2 Cell |
| <i>APP</i>           | 0.44 | 0.00 | 0.00 | 0.84 | 0.58 | 2 | AT2 Cell |
| <i>ELOVL1</i>        | 0.71 | 0.00 | 0.00 | 0.33 | 0.13 | 2 | AT2 Cell |
| <i>ATP6V1A</i>       | 0.58 | 0.00 | 0.00 | 0.47 | 0.24 | 2 | AT2 Cell |
| <i>SCP2</i>          | 0.64 | 0.00 | 0.00 | 0.54 | 0.31 | 2 | AT2 Cell |
| <i>IAH1</i>          | 0.65 | 0.00 | 0.00 | 0.29 | 0.11 | 2 | AT2 Cell |
| <i>DBI</i>           | 0.56 | 0.00 | 0.00 | 0.58 | 0.35 | 2 | AT2 Cell |
| <i>CITED2</i>        | 0.61 | 0.00 | 0.00 | 0.25 | 0.09 | 2 | AT2 Cell |
| <i>FKBP4</i>         | 0.61 | 0.00 | 0.00 | 0.30 | 0.12 | 2 | AT2 Cell |
| <i>TMBIM6</i>        | 0.50 | 0.00 | 0.00 | 0.61 | 0.38 | 2 | AT2 Cell |
| <i>LMO7</i>          | 0.28 | 0.00 | 0.00 | 0.28 | 0.10 | 2 | AT2 Cell |
| <i>SOCS2</i>         | 0.54 | 0.00 | 0.00 | 0.52 | 0.30 | 2 | AT2 Cell |
| <i>TNFAIP1</i>       | 0.55 | 0.00 | 0.00 | 0.32 | 0.14 | 2 | AT2 Cell |
| <i>PRKCI</i>         | 0.55 | 0.00 | 0.00 | 0.26 | 0.10 | 2 | AT2 Cell |
| <i>CTNNB1</i>        | 0.50 | 0.00 | 0.00 | 0.54 | 0.32 | 2 | AT2 Cell |
| <i>NFE2L2</i>        | 0.52 | 0.00 | 0.00 | 0.43 | 0.23 | 2 | AT2 Cell |
| <i>BSG</i>           | 0.45 | 0.00 | 0.00 | 0.57 | 0.37 | 2 | AT2 Cell |
| <i>RNASET2</i>       | 0.48 | 0.00 | 0.00 | 0.42 | 0.23 | 2 | AT2 Cell |
| <i>ARF6</i>          | 0.49 | 0.00 | 0.00 | 0.34 | 0.17 | 2 | AT2 Cell |
| <i>NDUFC2-KCTD14</i> | 0.41 | 0.00 | 0.00 | 0.53 | 0.33 | 2 | AT2 Cell |
| <i>EMC6</i>          | 0.48 | 0.00 | 0.00 | 0.27 | 0.12 | 2 | AT2 Cell |
| <i>HERPUD1</i>       | 0.56 | 0.00 | 0.00 | 0.28 | 0.14 | 2 | AT2 Cell |
| <i>CSTB</i>          | 0.37 | 0.00 | 0.00 | 0.44 | 0.27 | 2 | AT2 Cell |
| <i>GOLGA4</i>        | 0.44 | 0.00 | 0.00 | 0.45 | 0.27 | 2 | AT2 Cell |
| <i>DSTN</i>          | 0.30 | 0.00 | 0.00 | 0.71 | 0.51 | 2 | AT2 Cell |
| <i>PHLDB2</i>        | 0.39 | 0.00 | 0.00 | 0.45 | 0.26 | 2 | AT2 Cell |
| <i>ATP6V1G1</i>      | 0.44 | 0.00 | 0.00 | 0.50 | 0.33 | 2 | AT2 Cell |
| <i>WLS</i>           | 0.39 | 0.00 | 0.00 | 0.37 | 0.20 | 2 | AT2 Cell |
| <i>IFT20</i>         | 0.44 | 0.00 | 0.00 | 0.39 | 0.23 | 2 | AT2 Cell |
| <i>SIVA1</i>         | 0.51 | 0.00 | 0.00 | 0.28 | 0.15 | 2 | AT2 Cell |
| <i>TMEM30A</i>       | 0.44 | 0.00 | 0.00 | 0.42 | 0.26 | 2 | AT2 Cell |
| <i>SNX4</i>          | 0.42 | 0.00 | 0.00 | 0.39 | 0.23 | 2 | AT2 Cell |
| <i>GPX4</i>          | 0.41 | 0.00 | 0.00 | 0.53 | 0.37 | 2 | AT2 Cell |
| <i>IRF2BP2</i>       | 0.42 | 0.00 | 0.00 | 0.27 | 0.14 | 2 | AT2 Cell |
| <i>AKAP9</i>         | 0.36 | 0.00 | 0.00 | 0.50 | 0.33 | 2 | AT2 Cell |
| <i>PRDX6</i>         | 0.49 | 0.00 | 0.00 | 0.42 | 0.28 | 2 | AT2 Cell |
| <i>SOD1</i>          | 0.34 | 0.00 | 0.00 | 0.62 | 0.46 | 2 | AT2 Cell |
| <i>CAMK2N1</i>       | 0.37 | 0.00 | 0.00 | 0.26 | 0.13 | 2 | AT2 Cell |
| <i>ATP1A1</i>        | 0.37 | 0.00 | 0.00 | 0.26 | 0.13 | 2 | AT2 Cell |

|                 |      |      |      |      |      |   |               |
|-----------------|------|------|------|------|------|---|---------------|
| <i>PIK3CA</i>   | 0.40 | 0.00 | 0.00 | 0.30 | 0.17 | 2 | AT2 Cell      |
| <i>ETFB</i>     | 0.38 | 0.00 | 0.00 | 0.41 | 0.26 | 2 | AT2 Cell      |
| <i>EIF4H</i>    | 0.51 | 0.00 | 0.00 | 0.40 | 0.26 | 2 | AT2 Cell      |
| <i>MTCH1</i>    | 0.47 | 0.00 | 0.00 | 0.28 | 0.16 | 2 | AT2 Cell      |
| <i>USE1</i>     | 0.34 | 0.00 | 0.00 | 0.39 | 0.24 | 2 | AT2 Cell      |
| <i>CREG1</i>    | 0.32 | 0.00 | 0.00 | 0.28 | 0.16 | 2 | AT2 Cell      |
| <i>TSPO</i>     | 0.28 | 0.00 | 0.00 | 0.39 | 0.25 | 2 | AT2 Cell      |
| <i>POLR2E</i>   | 0.32 | 0.00 | 0.00 | 0.27 | 0.16 | 2 | AT2 Cell      |
| <i>HIGD1A</i>   | 0.31 | 0.00 | 0.00 | 0.28 | 0.17 | 2 | AT2 Cell      |
| <i>HDGF</i>     | 0.29 | 0.00 | 0.00 | 0.34 | 0.22 | 2 | AT2 Cell      |
| <i>ACADL</i>    | 0.27 | 0.00 | 0.00 | 0.31 | 0.19 | 2 | AT2 Cell      |
| <i>TCEAL8</i>   | 0.34 | 0.00 | 0.00 | 0.30 | 0.20 | 2 | AT2 Cell      |
| <i>SCGB1A1</i>  | 3.18 | 0.00 | 0.00 | 0.43 | 0.31 | 2 | AT2 Cell      |
| <i>MAP1LC3A</i> | 0.27 | 0.00 | 0.00 | 0.30 | 0.20 | 2 | AT2 Cell      |
| <i>NEMF</i>     | 0.27 | 0.00 | 0.00 | 0.31 | 0.21 | 2 | AT2 Cell      |
| <i>ATXN10</i>   | 0.28 | 0.00 | 0.00 | 0.28 | 0.19 | 2 | AT2 Cell      |
| <i>VAPA</i>     | 0.27 | 0.00 | 0.00 | 0.33 | 0.23 | 2 | AT2 Cell      |
| <i>RGCC</i>     | 0.54 | 0.00 | 0.00 | 0.26 | 0.19 | 2 | AT2 Cell      |
| <i>TGFBI</i>    | 3.06 | 0.00 | 0.00 | 0.93 | 0.13 | 3 | Myofibroblast |
| <i>ASPN</i>     | 2.88 | 0.00 | 0.00 | 0.46 | 0.07 | 3 | Myofibroblast |
| <i>TAGLN</i>    | 2.27 | 0.00 | 0.00 | 0.79 | 0.12 | 3 | Myofibroblast |
| <i>TNC</i>      | 2.27 | 0.00 | 0.00 | 0.75 | 0.08 | 3 | Myofibroblast |
| <i>HTRA1</i>    | 2.24 | 0.00 | 0.00 | 0.54 | 0.04 | 3 | Myofibroblast |
| <i>AGT</i>      | 2.19 | 0.00 | 0.00 | 0.62 | 0.03 | 3 | Myofibroblast |
| <i>ACTA2</i>    | 2.17 | 0.00 | 0.00 | 0.85 | 0.18 | 3 | Myofibroblast |
| <i>P2RY14</i>   | 2.16 | 0.00 | 0.00 | 0.59 | 0.03 | 3 | Myofibroblast |
| <i>LOXL2</i>    | 2.14 | 0.00 | 0.00 | 0.64 | 0.08 | 3 | Myofibroblast |
| <i>ACTG2</i>    | 2.06 | 0.00 | 0.00 | 0.54 | 0.04 | 3 | Myofibroblast |
| <i>MYH11</i>    | 2.04 | 0.00 | 0.00 | 0.73 | 0.06 | 3 | Myofibroblast |
| <i>IGF1</i>     | 2.03 | 0.00 | 0.00 | 0.65 | 0.08 | 3 | Myofibroblast |
| <i>PRSS35</i>   | 2.02 | 0.00 | 0.00 | 0.52 | 0.03 | 3 | Myofibroblast |
| <i>WNT5A</i>    | 2.02 | 0.00 | 0.00 | 0.58 | 0.05 | 3 | Myofibroblast |
| <i>LTBP2</i>    | 1.93 | 0.00 | 0.00 | 0.59 | 0.05 | 3 | Myofibroblast |
| <i>PDLIM3</i>   | 1.80 | 0.00 | 0.00 | 0.54 | 0.03 | 3 | Myofibroblast |
| <i>DES</i>      | 1.80 | 0.00 | 0.00 | 0.44 | 0.03 | 3 | Myofibroblast |
| <i>NET1</i>     | 1.79 | 0.00 | 0.00 | 0.59 | 0.11 | 3 | Myofibroblast |
| <i>FILIP1L</i>  | 1.73 | 0.00 | 0.00 | 0.85 | 0.28 | 3 | Myofibroblast |
| <i>SPON2</i>    | 1.71 | 0.00 | 0.00 | 0.48 | 0.03 | 3 | Myofibroblast |
| <i>CALD1</i>    | 1.64 | 0.00 | 0.00 | 0.94 | 0.39 | 3 | Myofibroblast |
| <i>SERPINE2</i> | 1.60 | 0.00 | 0.00 | 0.74 | 0.20 | 3 | Myofibroblast |
| <i>MUSTN1</i>   | 1.60 | 0.00 | 0.00 | 0.41 | 0.04 | 3 | Myofibroblast |
| <i>FSTL1</i>    | 1.59 | 0.00 | 0.00 | 0.92 | 0.41 | 3 | Myofibroblast |
| <i>OLFML2B</i>  | 1.58 | 0.00 | 0.00 | 0.42 | 0.03 | 3 | Myofibroblast |

|                |      |      |      |      |      |   |               |
|----------------|------|------|------|------|------|---|---------------|
| <i>CKB</i>     | 1.54 | 0.00 | 0.00 | 0.56 | 0.09 | 3 | Myofibroblast |
| <i>TPM2</i>    | 1.51 | 0.00 | 0.00 | 0.65 | 0.13 | 3 | Myofibroblast |
| <i>COL3A1</i>  | 1.49 | 0.00 | 0.00 | 0.97 | 0.28 | 3 | Myofibroblast |
| <i>PDE5A</i>   | 1.48 | 0.00 | 0.00 | 0.51 | 0.07 | 3 | Myofibroblast |
| <i>THBS1</i>   | 1.47 | 0.00 | 0.00 | 0.49 | 0.09 | 3 | Myofibroblast |
| <i>NES</i>     | 1.42 | 0.00 | 0.00 | 0.61 | 0.17 | 3 | Myofibroblast |
| <i>MYL9</i>    | 1.41 | 0.00 | 0.00 | 0.61 | 0.12 | 3 | Myofibroblast |
| <i>LGALS1</i>  | 1.41 | 0.00 | 0.00 | 0.96 | 0.41 | 3 | Myofibroblast |
| <i>CD248</i>   | 1.39 | 0.00 | 0.00 | 0.33 | 0.02 | 3 | Myofibroblast |
| <i>NREP</i>    | 1.37 | 0.00 | 0.00 | 0.86 | 0.39 | 3 | Myofibroblast |
| <i>CNN1</i>    | 1.36 | 0.00 | 0.00 | 0.25 | 0.02 | 3 | Myofibroblast |
| <i>FNDC1</i>   | 1.32 | 0.00 | 0.00 | 0.33 | 0.02 | 3 | Myofibroblast |
| <i>ELN</i>     | 1.29 | 0.00 | 0.00 | 0.53 | 0.15 | 3 | Myofibroblast |
| <i>HLF</i>     | 1.29 | 0.00 | 0.00 | 0.28 | 0.02 | 3 | Myofibroblast |
| <i>PDGFRA</i>  | 1.27 | 0.00 | 0.00 | 0.30 | 0.03 | 3 | Myofibroblast |
| <i>MYLK</i>    | 1.26 | 0.00 | 0.00 | 0.74 | 0.25 | 3 | Myofibroblast |
| <i>COL5A1</i>  | 1.25 | 0.00 | 0.00 | 0.44 | 0.07 | 3 | Myofibroblast |
| <i>MAP1B</i>   | 1.22 | 0.00 | 0.00 | 0.39 | 0.07 | 3 | Myofibroblast |
| <i>TGFB2</i>   | 1.22 | 0.00 | 0.00 | 0.43 | 0.10 | 3 | Myofibroblast |
| <i>IGFBP5</i>  | 1.21 | 0.00 | 0.00 | 0.39 | 0.07 | 3 | Myofibroblast |
| <i>DKK3</i>    | 1.20 | 0.00 | 0.00 | 0.49 | 0.10 | 3 | Myofibroblast |
| <i>TPM1</i>    | 1.20 | 0.00 | 0.00 | 0.91 | 0.48 | 3 | Myofibroblast |
| <i>MDK</i>     | 1.19 | 0.00 | 0.00 | 0.65 | 0.18 | 3 | Myofibroblast |
| <i>LPAR1</i>   | 1.19 | 0.00 | 0.00 | 0.29 | 0.04 | 3 | Myofibroblast |
| <i>ROBO2</i>   | 1.19 | 0.00 | 0.00 | 0.36 | 0.06 | 3 | Myofibroblast |
| <i>PAMR1</i>   | 1.18 | 0.00 | 0.00 | 0.26 | 0.03 | 3 | Myofibroblast |
| <i>C1QTNF7</i> | 1.17 | 0.00 | 0.00 | 0.35 | 0.06 | 3 | Myofibroblast |
| <i>MYH10</i>   | 1.17 | 0.00 | 0.00 | 0.63 | 0.18 | 3 | Myofibroblast |
| <i>BGN</i>     | 1.12 | 0.00 | 0.00 | 0.72 | 0.21 | 3 | Myofibroblast |
| <i>RCN3</i>    | 1.10 | 0.00 | 0.00 | 0.44 | 0.10 | 3 | Myofibroblast |
| <i>ANGPTL2</i> | 1.10 | 0.00 | 0.00 | 0.28 | 0.03 | 3 | Myofibroblast |
| <i>CTGF</i>    | 1.09 | 0.00 | 0.00 | 0.32 | 0.07 | 3 | Myofibroblast |
| <i>COL27A1</i> | 1.09 | 0.00 | 0.00 | 0.29 | 0.04 | 3 | Myofibroblast |
| <i>TGFB3</i>   | 1.08 | 0.00 | 0.00 | 0.28 | 0.04 | 3 | Myofibroblast |
| <i>COL1A2</i>  | 1.08 | 0.00 | 0.00 | 0.98 | 0.35 | 3 | Myofibroblast |
| <i>LMCD1</i>   | 1.07 | 0.00 | 0.00 | 0.31 | 0.05 | 3 | Myofibroblast |
| <i>ADAMTS2</i> | 1.06 | 0.00 | 0.00 | 0.34 | 0.08 | 3 | Myofibroblast |
| <i>MFAP2</i>   | 1.06 | 0.00 | 0.00 | 0.76 | 0.31 | 3 | Myofibroblast |
| <i>FAM129A</i> | 1.06 | 0.00 | 0.00 | 0.32 | 0.06 | 3 | Myofibroblast |
| <i>PALLD</i>   | 1.02 | 0.00 | 0.00 | 0.53 | 0.14 | 3 | Myofibroblast |
| <i>LMNA</i>    | 1.01 | 0.00 | 0.00 | 0.51 | 0.20 | 3 | Myofibroblast |
| <i>SAMD4A</i>  | 1.01 | 0.00 | 0.00 | 0.29 | 0.06 | 3 | Myofibroblast |
| <i>TSHZ2</i>   | 1.01 | 0.00 | 0.00 | 0.32 | 0.07 | 3 | Myofibroblast |

|                 |      |      |      |      |      |   |               |
|-----------------|------|------|------|------|------|---|---------------|
| <i>DDR2</i>     | 1.00 | 0.00 | 0.00 | 0.27 | 0.04 | 3 | Myofibroblast |
| <i>LSP1</i>     | 0.99 | 0.00 | 0.00 | 0.48 | 0.16 | 3 | Myofibroblast |
| <i>FBN1</i>     | 0.99 | 0.00 | 0.00 | 0.49 | 0.14 | 3 | Myofibroblast |
| <i>CREB3L2</i>  | 0.99 | 0.00 | 0.00 | 0.38 | 0.11 | 3 | Myofibroblast |
| <i>PDZRN3</i>   | 0.99 | 0.00 | 0.00 | 0.27 | 0.04 | 3 | Myofibroblast |
| <i>MGP</i>      | 0.98 | 0.00 | 0.00 | 0.72 | 0.30 | 3 | Myofibroblast |
| <i>CYGB</i>     | 0.97 | 0.00 | 0.00 | 0.28 | 0.05 | 3 | Myofibroblast |
| <i>LHFPL2</i>   | 0.95 | 0.00 | 0.00 | 0.31 | 0.06 | 3 | Myofibroblast |
| <i>POSTN</i>    | 0.95 | 0.00 | 0.00 | 0.31 | 0.07 | 3 | Myofibroblast |
| <i>C11orf96</i> | 0.94 | 0.00 | 0.00 | 0.30 | 0.06 | 3 | Myofibroblast |
| <i>RGS2</i>     | 0.94 | 0.00 | 0.00 | 0.57 | 0.25 | 3 | Myofibroblast |
| <i>CYR61</i>    | 0.94 | 0.00 | 0.00 | 0.34 | 0.10 | 3 | Myofibroblast |
| <i>PDLIM7</i>   | 0.93 | 0.00 | 0.00 | 0.36 | 0.10 | 3 | Myofibroblast |
| <i>GRB10</i>    | 0.93 | 0.00 | 0.00 | 0.40 | 0.12 | 3 | Myofibroblast |
| <i>PRNP</i>     | 0.93 | 0.00 | 0.00 | 0.36 | 0.12 | 3 | Myofibroblast |
| <i>ITGA9</i>    | 0.91 | 0.00 | 0.00 | 0.32 | 0.07 | 3 | Myofibroblast |
| <i>COL1A1</i>   | 0.91 | 0.00 | 0.00 | 0.80 | 0.23 | 3 | Myofibroblast |
| <i>SOCS2</i>    | 0.90 | 0.00 | 0.00 | 0.63 | 0.29 | 3 | Myofibroblast |
| <i>RBMS3</i>    | 0.89 | 0.00 | 0.00 | 0.45 | 0.15 | 3 | Myofibroblast |
| <i>PMEPA1</i>   | 0.89 | 0.00 | 0.00 | 0.33 | 0.09 | 3 | Myofibroblast |
| <i>GOLIM4</i>   | 0.88 | 0.00 | 0.00 | 0.48 | 0.18 | 3 | Myofibroblast |
| <i>CNN3</i>     | 0.88 | 0.00 | 0.00 | 0.67 | 0.29 | 3 | Myofibroblast |
| <i>ETV1</i>     | 0.87 | 0.00 | 0.00 | 0.26 | 0.06 | 3 | Myofibroblast |
| <i>CALU</i>     | 0.86 | 0.00 | 0.00 | 0.55 | 0.22 | 3 | Myofibroblast |
| <i>COL5A2</i>   | 0.85 | 0.00 | 0.00 | 0.46 | 0.16 | 3 | Myofibroblast |
| <i>MXRA7</i>    | 0.84 | 0.00 | 0.00 | 0.38 | 0.12 | 3 | Myofibroblast |
| <i>ISM1</i>     | 0.82 | 0.00 | 0.00 | 0.28 | 0.06 | 3 | Myofibroblast |
| <i>PRDM6</i>    | 0.80 | 0.00 | 0.00 | 0.25 | 0.05 | 3 | Myofibroblast |
| <i>SMTN</i>     | 0.79 | 0.00 | 0.00 | 0.29 | 0.07 | 3 | Myofibroblast |
| <i>NFIB</i>     | 0.79 | 0.00 | 0.00 | 0.78 | 0.44 | 3 | Myofibroblast |
| <i>SOX4</i>     | 0.78 | 0.00 | 0.00 | 0.71 | 0.37 | 3 | Myofibroblast |
| <i>NEXN</i>     | 0.78 | 0.00 | 0.00 | 0.55 | 0.18 | 3 | Myofibroblast |
| <i>COL6A3</i>   | 0.78 | 0.00 | 0.00 | 0.38 | 0.10 | 3 | Myofibroblast |
| <i>SERPINH1</i> | 0.77 | 0.00 | 0.00 | 0.73 | 0.38 | 3 | Myofibroblast |
| <i>RARRES2</i>  | 0.77 | 0.00 | 0.00 | 0.48 | 0.13 | 3 | Myofibroblast |
| <i>ANXA5</i>    | 0.76 | 0.00 | 0.00 | 0.71 | 0.40 | 3 | Myofibroblast |
| <i>SPARC</i>    | 0.62 | 0.00 | 0.00 | 0.98 | 0.74 | 3 | Myofibroblast |
| <i>PLAC9</i>    | 0.53 | 0.00 | 0.00 | 0.65 | 0.27 | 3 | Myofibroblast |
| <i>CD44</i>     | 0.68 | 0.00 | 0.00 | 0.47 | 0.18 | 3 | Myofibroblast |
| <i>TUBA1A</i>   | 0.67 | 0.00 | 0.00 | 0.78 | 0.50 | 3 | Myofibroblast |
| <i>HMCN1</i>    | 0.96 | 0.00 | 0.00 | 0.35 | 0.11 | 3 | Myofibroblast |
| <i>PROS1</i>    | 0.78 | 0.00 | 0.00 | 0.28 | 0.08 | 3 | Myofibroblast |
| <i>SEMA3C</i>   | 0.60 | 0.00 | 0.00 | 0.46 | 0.17 | 3 | Myofibroblast |

|                 |      |      |      |      |      |   |               |
|-----------------|------|------|------|------|------|---|---------------|
| <i>TGFB1I1</i>  | 0.72 | 0.00 | 0.00 | 0.38 | 0.13 | 3 | Myofibroblast |
| <i>CALM2</i>    | 0.57 | 0.00 | 0.00 | 0.86 | 0.64 | 3 | Myofibroblast |
| <i>MMP14</i>    | 0.75 | 0.00 | 0.00 | 0.51 | 0.22 | 3 | Myofibroblast |
| <i>FLNA</i>     | 0.71 | 0.00 | 0.00 | 0.51 | 0.22 | 3 | Myofibroblast |
| <i>LOXL1</i>    | 0.75 | 0.00 | 0.00 | 0.31 | 0.10 | 3 | Myofibroblast |
| <i>FKBP7</i>    | 0.74 | 0.00 | 0.00 | 0.35 | 0.12 | 3 | Myofibroblast |
| <i>GHR</i>      | 0.81 | 0.00 | 0.00 | 0.33 | 0.12 | 3 | Myofibroblast |
| <i>CSRP2</i>    | 0.66 | 0.00 | 0.00 | 0.38 | 0.14 | 3 | Myofibroblast |
| <i>ILK</i>      | 0.67 | 0.00 | 0.00 | 0.47 | 0.21 | 3 | Myofibroblast |
| <i>ITGB1</i>    | 0.52 | 0.00 | 0.00 | 0.85 | 0.62 | 3 | Myofibroblast |
| <i>CELF2</i>    | 0.70 | 0.00 | 0.00 | 0.51 | 0.24 | 3 | Myofibroblast |
| <i>ACTN1</i>    | 0.71 | 0.00 | 0.00 | 0.46 | 0.21 | 3 | Myofibroblast |
| <i>RORA</i>     | 0.81 | 0.00 | 0.00 | 0.26 | 0.08 | 3 | Myofibroblast |
| <i>TIMP2</i>    | 0.67 | 0.00 | 0.00 | 0.44 | 0.20 | 3 | Myofibroblast |
| <i>COL6A2</i>   | 0.58 | 0.00 | 0.00 | 0.40 | 0.16 | 3 | Myofibroblast |
| <i>TSPAN3</i>   | 0.64 | 0.00 | 0.00 | 0.37 | 0.15 | 3 | Myofibroblast |
| <i>PXDN</i>     | 0.66 | 0.00 | 0.00 | 0.29 | 0.10 | 3 | Myofibroblast |
| <i>CD63</i>     | 0.56 | 0.00 | 0.00 | 0.60 | 0.32 | 3 | Myofibroblast |
| <i>TPM4</i>     | 0.55 | 0.00 | 0.00 | 0.73 | 0.48 | 3 | Myofibroblast |
| <i>PTMA</i>     | 0.35 | 0.00 | 0.00 | 0.97 | 0.91 | 3 | Myofibroblast |
| <i>GPM6B</i>    | 0.61 | 0.00 | 0.00 | 0.31 | 0.11 | 3 | Myofibroblast |
| <i>LAMA4</i>    | 0.66 | 0.00 | 0.00 | 0.32 | 0.12 | 3 | Myofibroblast |
| <i>COL6A1</i>   | 0.52 | 0.00 | 0.00 | 0.45 | 0.20 | 3 | Myofibroblast |
| <i>PPIC</i>     | 0.56 | 0.00 | 0.00 | 0.62 | 0.36 | 3 | Myofibroblast |
| <i>FNDC3B</i>   | 0.66 | 0.00 | 0.00 | 0.28 | 0.10 | 3 | Myofibroblast |
| <i>MYL6</i>     | 0.55 | 0.00 | 0.00 | 0.86 | 0.71 | 3 | Myofibroblast |
| <i>RCN2</i>     | 0.65 | 0.00 | 0.00 | 0.35 | 0.15 | 3 | Myofibroblast |
| <i>SH3PXD2A</i> | 0.63 | 0.00 | 0.00 | 0.27 | 0.09 | 3 | Myofibroblast |
| <i>MLLT3</i>    | 0.70 | 0.00 | 0.00 | 0.27 | 0.09 | 3 | Myofibroblast |
| <i>LAMB1</i>    | 0.62 | 0.00 | 0.00 | 0.34 | 0.14 | 3 | Myofibroblast |
| <i>MXRA8</i>    | 0.51 | 0.00 | 0.00 | 0.37 | 0.15 | 3 | Myofibroblast |
| <i>RYK</i>      | 0.66 | 0.00 | 0.00 | 0.28 | 0.10 | 3 | Myofibroblast |
| <i>C9orf3</i>   | 0.64 | 0.00 | 0.00 | 0.26 | 0.09 | 3 | Myofibroblast |
| <i>ADAMTS10</i> | 0.65 | 0.00 | 0.00 | 0.26 | 0.09 | 3 | Myofibroblast |
| <i>DSTN</i>     | 0.56 | 0.00 | 0.00 | 0.74 | 0.51 | 3 | Myofibroblast |
| <i>FGFR1</i>    | 0.59 | 0.00 | 0.00 | 0.27 | 0.10 | 3 | Myofibroblast |
| <i>ANTXR1</i>   | 0.57 | 0.00 | 0.00 | 0.30 | 0.11 | 3 | Myofibroblast |
| <i>HSP90B1</i>  | 0.47 | 0.00 | 0.00 | 0.87 | 0.74 | 3 | Myofibroblast |
| <i>P4HB</i>     | 0.56 | 0.00 | 0.00 | 0.63 | 0.40 | 3 | Myofibroblast |
| <i>MAGED2</i>   | 0.48 | 0.00 | 0.00 | 0.40 | 0.19 | 3 | Myofibroblast |
| <i>NFIX</i>     | 0.60 | 0.00 | 0.00 | 0.34 | 0.15 | 3 | Myofibroblast |
| <i>ARF4</i>     | 0.54 | 0.00 | 0.00 | 0.50 | 0.27 | 3 | Myofibroblast |
| <i>GPX8</i>     | 0.60 | 0.00 | 0.00 | 0.29 | 0.12 | 3 | Myofibroblast |

|                 |      |      |      |      |      |   |               |
|-----------------|------|------|------|------|------|---|---------------|
| <i>CD81</i>     | 0.46 | 0.00 | 0.00 | 0.62 | 0.38 | 3 | Myofibroblast |
| <i>TTC3</i>     | 0.57 | 0.00 | 0.00 | 0.49 | 0.27 | 3 | Myofibroblast |
| <i>PARVA</i>    | 0.54 | 0.00 | 0.00 | 0.32 | 0.14 | 3 | Myofibroblast |
| <i>AMOTL1</i>   | 0.61 | 0.00 | 0.00 | 0.31 | 0.14 | 3 | Myofibroblast |
| <i>SNAI2</i>    | 0.56 | 0.00 | 0.00 | 0.27 | 0.11 | 3 | Myofibroblast |
| <i>MORF4L2</i>  | 0.54 | 0.00 | 0.00 | 0.42 | 0.22 | 3 | Myofibroblast |
| <i>NUPR1</i>    | 0.36 | 0.00 | 0.00 | 0.39 | 0.19 | 3 | Myofibroblast |
| <i>MAGED1</i>   | 0.53 | 0.00 | 0.00 | 0.35 | 0.17 | 3 | Myofibroblast |
| <i>VCAN</i>     | 0.48 | 0.00 | 0.00 | 0.28 | 0.12 | 3 | Myofibroblast |
| <i>CDK4</i>     | 0.51 | 0.00 | 0.00 | 0.42 | 0.22 | 3 | Myofibroblast |
| <i>TWSG1</i>    | 0.53 | 0.00 | 0.00 | 0.25 | 0.11 | 3 | Myofibroblast |
| <i>CKAP4</i>    | 0.52 | 0.00 | 0.00 | 0.34 | 0.16 | 3 | Myofibroblast |
| <i>TSC22D1</i>  | 0.46 | 0.00 | 0.00 | 0.54 | 0.33 | 3 | Myofibroblast |
| <i>GNG12</i>    | 0.48 | 0.00 | 0.00 | 0.26 | 0.11 | 3 | Myofibroblast |
| <i>NFIC</i>     | 0.45 | 0.00 | 0.00 | 0.43 | 0.23 | 3 | Myofibroblast |
| <i>PICALM</i>   | 0.57 | 0.00 | 0.00 | 0.36 | 0.19 | 3 | Myofibroblast |
| <i>PLS3</i>     | 0.48 | 0.00 | 0.00 | 0.38 | 0.20 | 3 | Myofibroblast |
| <i>MINOS1</i>   | 0.45 | 0.00 | 0.00 | 0.62 | 0.43 | 3 | Myofibroblast |
| <i>RRBP1</i>    | 0.46 | 0.00 | 0.00 | 0.71 | 0.53 | 3 | Myofibroblast |
| <i>ANXA6</i>    | 0.46 | 0.00 | 0.00 | 0.39 | 0.21 | 3 | Myofibroblast |
| <i>PRDX4</i>    | 0.47 | 0.00 | 0.00 | 0.30 | 0.15 | 3 | Myofibroblast |
| <i>SVIL</i>     | 0.51 | 0.00 | 0.00 | 0.31 | 0.15 | 3 | Myofibroblast |
| <i>TBX2</i>     | 0.41 | 0.00 | 0.00 | 0.28 | 0.12 | 3 | Myofibroblast |
| <i>NFIA</i>     | 0.46 | 0.00 | 0.00 | 0.41 | 0.23 | 3 | Myofibroblast |
| <i>NDUFA11</i>  | 0.44 | 0.00 | 0.00 | 0.47 | 0.28 | 3 | Myofibroblast |
| <i>FKBP9</i>    | 0.44 | 0.00 | 0.00 | 0.27 | 0.13 | 3 | Myofibroblast |
| <i>VIM</i>      | 0.29 | 0.00 | 0.00 | 0.89 | 0.67 | 3 | Myofibroblast |
| <i>LAMC1</i>    | 0.45 | 0.00 | 0.00 | 0.30 | 0.15 | 3 | Myofibroblast |
| <i>HMGN1</i>    | 0.38 | 0.00 | 0.00 | 0.64 | 0.44 | 3 | Myofibroblast |
| <i>PHLDB2</i>   | 0.47 | 0.00 | 0.00 | 0.44 | 0.27 | 3 | Myofibroblast |
| <i>TJP2</i>     | 0.54 | 0.00 | 0.00 | 0.29 | 0.15 | 3 | Myofibroblast |
| <i>CSRP1</i>    | 0.56 | 0.00 | 0.00 | 0.33 | 0.18 | 3 | Myofibroblast |
| <i>ITM2C</i>    | 0.44 | 0.00 | 0.00 | 0.39 | 0.23 | 3 | Myofibroblast |
| <i>ARID5B</i>   | 0.46 | 0.00 | 0.00 | 0.37 | 0.21 | 3 | Myofibroblast |
| <i>MARCKSL1</i> | 0.36 | 0.00 | 0.00 | 0.39 | 0.22 | 3 | Myofibroblast |
| <i>PRDX2</i>    | 0.38 | 0.00 | 0.00 | 0.52 | 0.34 | 3 | Myofibroblast |
| <i>DST</i>      | 0.44 | 0.00 | 0.00 | 0.29 | 0.15 | 3 | Myofibroblast |
| <i>CDC42EP3</i> | 0.48 | 0.00 | 0.00 | 0.26 | 0.12 | 3 | Myofibroblast |
| <i>SEPT2</i>    | 0.37 | 0.00 | 0.00 | 0.53 | 0.35 | 3 | Myofibroblast |
| <i>DDAH2</i>    | 0.34 | 0.00 | 0.00 | 0.45 | 0.27 | 3 | Myofibroblast |
| <i>NEDD4</i>    | 0.38 | 0.00 | 0.00 | 0.65 | 0.48 | 3 | Myofibroblast |
| <i>SEPT11</i>   | 0.41 | 0.00 | 0.00 | 0.37 | 0.21 | 3 | Myofibroblast |
| <i>NPTN</i>     | 0.42 | 0.00 | 0.00 | 0.33 | 0.19 | 3 | Myofibroblast |

|                 |      |      |      |      |      |   |               |
|-----------------|------|------|------|------|------|---|---------------|
| <i>LAPTM4A</i>  | 0.30 | 0.00 | 0.00 | 0.72 | 0.54 | 3 | Myofibroblast |
| <i>SLMAP</i>    | 0.45 | 0.00 | 0.00 | 0.27 | 0.14 | 3 | Myofibroblast |
| <i>SSR2</i>     | 0.35 | 0.00 | 0.00 | 0.50 | 0.33 | 3 | Myofibroblast |
| <i>SLC25A4</i>  | 0.34 | 0.00 | 0.00 | 0.62 | 0.46 | 3 | Myofibroblast |
| <i>DYNLRB1</i>  | 0.37 | 0.00 | 0.00 | 0.51 | 0.34 | 3 | Myofibroblast |
| <i>CCND2</i>    | 0.50 | 0.00 | 0.00 | 0.41 | 0.26 | 3 | Myofibroblast |
| <i>KDEL2</i>    | 0.38 | 0.00 | 0.00 | 0.34 | 0.20 | 3 | Myofibroblast |
| <i>NR2F2</i>    | 0.26 | 0.00 | 0.00 | 0.35 | 0.20 | 3 | Myofibroblast |
| <i>C5orf15</i>  | 0.37 | 0.00 | 0.00 | 0.29 | 0.16 | 3 | Myofibroblast |
| <i>TMED9</i>    | 0.35 | 0.00 | 0.00 | 0.42 | 0.27 | 3 | Myofibroblast |
| <i>CRYAB</i>    | 0.30 | 0.00 | 0.00 | 0.28 | 0.15 | 3 | Myofibroblast |
| <i>RBBP7</i>    | 0.34 | 0.00 | 0.00 | 0.38 | 0.23 | 3 | Myofibroblast |
| <i>SERF2</i>    | 0.28 | 0.00 | 0.00 | 0.74 | 0.58 | 3 | Myofibroblast |
| <i>RSU1</i>     | 0.35 | 0.00 | 0.00 | 0.33 | 0.19 | 3 | Myofibroblast |
| <i>RTN4</i>     | 0.36 | 0.00 | 0.00 | 0.40 | 0.25 | 3 | Myofibroblast |
| <i>ATP2B1</i>   | 0.35 | 0.00 | 0.00 | 0.66 | 0.55 | 3 | Myofibroblast |
| <i>MRFAP1</i>   | 0.30 | 0.00 | 0.00 | 0.50 | 0.34 | 3 | Myofibroblast |
| <i>HSPA5</i>    | 0.31 | 0.00 | 0.00 | 0.69 | 0.53 | 3 | Myofibroblast |
| <i>LMAN1</i>    | 0.35 | 0.00 | 0.00 | 0.30 | 0.17 | 3 | Myofibroblast |
| <i>THOC7</i>    | 0.34 | 0.00 | 0.00 | 0.44 | 0.29 | 3 | Myofibroblast |
| <i>MAP1LC3A</i> | 0.38 | 0.00 | 0.00 | 0.32 | 0.20 | 3 | Myofibroblast |
| <i>MYH9</i>     | 0.29 | 0.00 | 0.00 | 0.48 | 0.33 | 3 | Myofibroblast |
| <i>TIA1</i>     | 0.31 | 0.00 | 0.00 | 0.33 | 0.20 | 3 | Myofibroblast |
| <i>CBX1</i>     | 0.30 | 0.00 | 0.00 | 0.54 | 0.38 | 3 | Myofibroblast |
| <i>NDUFS5</i>   | 0.46 | 0.00 | 0.00 | 0.38 | 0.26 | 3 | Myofibroblast |
| <i>COX20</i>    | 0.30 | 0.00 | 0.00 | 0.29 | 0.17 | 3 | Myofibroblast |
| <i>ZFP36L1</i>  | 0.29 | 0.00 | 0.00 | 0.60 | 0.45 | 3 | Myofibroblast |
| <i>RANBP1</i>   | 0.30 | 0.00 | 0.00 | 0.43 | 0.29 | 3 | Myofibroblast |
| <i>DDOST</i>    | 0.34 | 0.00 | 0.00 | 0.31 | 0.19 | 3 | Myofibroblast |
| <i>PDAP1</i>    | 0.29 | 0.00 | 0.00 | 0.57 | 0.43 | 3 | Myofibroblast |
| <i>PDIA6</i>    | 0.31 | 0.00 | 0.00 | 0.45 | 0.31 | 3 | Myofibroblast |
| <i>GSTP1</i>    | 0.27 | 0.00 | 0.00 | 0.36 | 0.23 | 3 | Myofibroblast |
| <i>IDH2</i>     | 0.31 | 0.00 | 0.00 | 0.30 | 0.19 | 3 | Myofibroblast |
| <i>PDLIM1</i>   | 0.30 | 0.00 | 0.00 | 0.26 | 0.15 | 3 | Myofibroblast |
| <i>MYO1B</i>    | 0.30 | 0.00 | 0.00 | 0.26 | 0.15 | 3 | Myofibroblast |
| <i>EPRS</i>     | 0.34 | 0.00 | 0.00 | 0.32 | 0.20 | 3 | Myofibroblast |
| <i>HNRNPA1</i>  | 0.43 | 0.00 | 0.00 | 0.42 | 0.30 | 3 | Myofibroblast |
| <i>RPN2</i>     | 0.31 | 0.00 | 0.00 | 0.32 | 0.20 | 3 | Myofibroblast |
| <i>LARP7</i>    | 0.31 | 0.00 | 0.00 | 0.27 | 0.16 | 3 | Myofibroblast |
| <i>PPIB</i>     | 0.26 | 0.00 | 0.00 | 0.59 | 0.45 | 3 | Myofibroblast |
| <i>SPCS1</i>    | 0.26 | 0.00 | 0.00 | 0.43 | 0.29 | 3 | Myofibroblast |
| <i>HNRNPR</i>   | 0.28 | 0.00 | 0.00 | 0.37 | 0.25 | 3 | Myofibroblast |
| <i>NENF</i>     | 0.31 | 0.00 | 0.00 | 0.30 | 0.19 | 3 | Myofibroblast |

|                 |      |      |      |      |      |   |               |
|-----------------|------|------|------|------|------|---|---------------|
| <i>HDLBP</i>    | 0.31 | 0.00 | 0.00 | 0.32 | 0.20 | 3 | Myofibroblast |
| <i>SEC13</i>    | 0.27 | 0.00 | 0.00 | 0.28 | 0.17 | 3 | Myofibroblast |
| <i>YBX3</i>     | 0.32 | 0.00 | 0.00 | 0.29 | 0.18 | 3 | Myofibroblast |
| <i>MIF</i>      | 0.26 | 0.00 | 0.00 | 0.34 | 0.22 | 3 | Myofibroblast |
| <i>TMEM59</i>   | 0.27 | 0.00 | 0.00 | 0.55 | 0.41 | 3 | Myofibroblast |
| <i>COPB2</i>    | 0.31 | 0.00 | 0.00 | 0.27 | 0.17 | 3 | Myofibroblast |
| <i>FUNDC2</i>   | 0.27 | 0.00 | 0.00 | 0.27 | 0.16 | 3 | Myofibroblast |
| <i>ROMO1</i>    | 0.26 | 0.00 | 0.00 | 0.43 | 0.30 | 3 | Myofibroblast |
| <i>PSMD7</i>    | 0.25 | 0.00 | 0.00 | 0.40 | 0.27 | 3 | Myofibroblast |
| <i>VEZF1</i>    | 0.32 | 0.00 | 0.00 | 0.32 | 0.21 | 3 | Myofibroblast |
| <i>CALR</i>     | 0.30 | 0.00 | 0.00 | 0.56 | 0.44 | 3 | Myofibroblast |
| <i>SAR1A</i>    | 0.29 | 0.00 | 0.00 | 0.31 | 0.20 | 3 | Myofibroblast |
| <i>GLG1</i>     | 0.28 | 0.00 | 0.00 | 0.29 | 0.18 | 3 | Myofibroblast |
| <i>CNPY2</i>    | 0.27 | 0.00 | 0.00 | 0.31 | 0.20 | 3 | Myofibroblast |
| <i>TXNL1</i>    | 0.26 | 0.00 | 0.00 | 0.29 | 0.18 | 3 | Myofibroblast |
| <i>SFR1</i>     | 0.28 | 0.00 | 0.00 | 0.41 | 0.29 | 3 | Myofibroblast |
| <i>DDX1</i>     | 0.28 | 0.00 | 0.00 | 0.25 | 0.16 | 3 | Myofibroblast |
| <i>RBPM5</i>    | 0.28 | 0.00 | 0.00 | 0.28 | 0.18 | 3 | Myofibroblast |
| <i>SUMO2</i>    | 0.25 | 0.00 | 0.00 | 0.45 | 0.33 | 3 | Myofibroblast |
| <i>ILF2</i>     | 0.29 | 0.00 | 0.00 | 0.29 | 0.19 | 3 | Myofibroblast |
| <i>RHEB</i>     | 0.27 | 0.00 | 0.00 | 0.29 | 0.19 | 3 | Myofibroblast |
| <i>CCNI</i>     | 0.38 | 0.00 | 0.00 | 0.29 | 0.19 | 3 | Myofibroblast |
| <i>NARS</i>     | 0.25 | 0.00 | 0.00 | 0.42 | 0.30 | 3 | Myofibroblast |
| <i>CFL2</i>     | 0.25 | 0.00 | 0.00 | 0.34 | 0.23 | 3 | Myofibroblast |
| <i>TMEM167A</i> | 0.26 | 0.00 | 0.00 | 0.31 | 0.21 | 3 | Myofibroblast |
| <i>BCCIP</i>    | 0.27 | 0.00 | 0.00 | 0.29 | 0.19 | 3 | Myofibroblast |
| <i>GINM1</i>    | 0.27 | 0.00 | 0.00 | 0.33 | 0.22 | 3 | Myofibroblast |
| <i>PURA</i>     | 0.30 | 0.00 | 0.00 | 0.29 | 0.19 | 3 | Myofibroblast |
| <i>CLIP1</i>    | 0.30 | 0.00 | 0.00 | 0.27 | 0.18 | 3 | Myofibroblast |
| <i>PURB</i>     | 0.26 | 0.00 | 0.00 | 0.43 | 0.33 | 3 | Myofibroblast |
| <i>CTSS</i>     | 3.35 | 0.00 | 0.00 | 0.90 | 0.06 | 4 | Macrophage    |
| <i>S100A8</i>   | 3.18 | 0.00 | 0.00 | 0.38 | 0.08 | 4 | Macrophage    |
| <i>TYROBP</i>   | 2.89 | 0.00 | 0.00 | 0.85 | 0.05 | 4 | Macrophage    |
| <i>FCER1G</i>   | 2.85 | 0.00 | 0.00 | 0.81 | 0.04 | 4 | Macrophage    |
| <i>CYBB</i>     | 2.71 | 0.00 | 0.00 | 0.70 | 0.03 | 4 | Macrophage    |
| <i>CCR2</i>     | 2.57 | 0.00 | 0.00 | 0.52 | 0.03 | 4 | Macrophage    |
| <i>MPEG1</i>    | 2.45 | 0.00 | 0.00 | 0.63 | 0.01 | 4 | Macrophage    |
| <i>ALOX5AP</i>  | 2.42 | 0.00 | 0.00 | 0.70 | 0.03 | 4 | Macrophage    |
| <i>PLAC8</i>    | 2.34 | 0.00 | 0.00 | 0.58 | 0.12 | 4 | Macrophage    |
| <i>LGALS3</i>   | 2.32 | 0.00 | 0.00 | 0.75 | 0.10 | 4 | Macrophage    |
| <i>LST1</i>     | 2.29 | 0.00 | 0.00 | 0.54 | 0.02 | 4 | Macrophage    |
| <i>SPI1</i>     | 2.10 | 0.00 | 0.00 | 0.53 | 0.01 | 4 | Macrophage    |
| <i>PLA2G7</i>   | 2.07 | 0.00 | 0.00 | 0.42 | 0.01 | 4 | Macrophage    |

|                 |      |      |      |      |      |   |            |
|-----------------|------|------|------|------|------|---|------------|
| <i>MSRB1</i>    | 2.04 | 0.00 | 0.00 | 0.62 | 0.09 | 4 | Macrophage |
| <i>LAPTM5</i>   | 2.03 | 0.00 | 0.00 | 0.74 | 0.07 | 4 | Macrophage |
| <i>MNDA</i>     | 1.92 | 0.00 | 0.00 | 0.41 | 0.02 | 4 | Macrophage |
| <i>APOE</i>     | 1.85 | 0.00 | 0.00 | 0.54 | 0.24 | 4 | Macrophage |
| <i>CYBA</i>     | 1.85 | 0.00 | 0.00 | 0.83 | 0.26 | 4 | Macrophage |
| <i>IGSF6</i>    | 1.84 | 0.00 | 0.00 | 0.40 | 0.01 | 4 | Macrophage |
| <i>AIF1</i>     | 1.82 | 0.00 | 0.00 | 0.29 | 0.01 | 4 | Macrophage |
| <i>PLBD1</i>    | 1.82 | 0.00 | 0.00 | 0.37 | 0.01 | 4 | Macrophage |
| <i>GDA</i>      | 1.76 | 0.00 | 0.00 | 0.35 | 0.01 | 4 | Macrophage |
| <i>S100A4</i>   | 1.76 | 0.00 | 0.00 | 0.47 | 0.06 | 4 | Macrophage |
| <i>PLEK</i>     | 1.72 | 0.00 | 0.00 | 0.42 | 0.03 | 4 | Macrophage |
| <i>PYGL</i>     | 1.65 | 0.00 | 0.00 | 0.44 | 0.06 | 4 | Macrophage |
| <i>CST3</i>     | 1.65 | 0.00 | 0.00 | 0.86 | 0.56 | 4 | Macrophage |
| <i>APBB1IP</i>  | 1.65 | 0.00 | 0.00 | 0.48 | 0.05 | 4 | Macrophage |
| <i>PLD4</i>     | 1.64 | 0.00 | 0.00 | 0.39 | 0.02 | 4 | Macrophage |
| <i>SAMSN1</i>   | 1.64 | 0.00 | 0.00 | 0.37 | 0.03 | 4 | Macrophage |
| <i>TNFAIP2</i>  | 1.61 | 0.00 | 0.00 | 0.32 | 0.02 | 4 | Macrophage |
| <i>CD52</i>     | 1.61 | 0.00 | 0.00 | 0.79 | 0.13 | 4 | Macrophage |
| <i>PTPRC</i>    | 1.60 | 0.00 | 0.00 | 0.64 | 0.09 | 4 | Macrophage |
| <i>CD300LF</i>  | 1.60 | 0.00 | 0.00 | 0.31 | 0.01 | 4 | Macrophage |
| <i>GSR</i>      | 1.59 | 0.00 | 0.00 | 0.37 | 0.05 | 4 | Macrophage |
| <i>RNASE6</i>   | 1.58 | 0.00 | 0.00 | 0.34 | 0.02 | 4 | Macrophage |
| <i>CORO1A</i>   | 1.57 | 0.00 | 0.00 | 0.49 | 0.06 | 4 | Macrophage |
| <i>SAMHD1</i>   | 1.56 | 0.00 | 0.00 | 0.61 | 0.15 | 4 | Macrophage |
| <i>LCP1</i>     | 1.54 | 0.00 | 0.00 | 0.66 | 0.16 | 4 | Macrophage |
| <i>CTSB</i>     | 1.53 | 0.00 | 0.00 | 0.62 | 0.25 | 4 | Macrophage |
| <i>CSF1R</i>    | 1.52 | 0.00 | 0.00 | 0.31 | 0.01 | 4 | Macrophage |
| <i>PRDX5</i>    | 1.51 | 0.00 | 0.00 | 0.69 | 0.29 | 4 | Macrophage |
| <i>ARHGAP30</i> | 1.51 | 0.00 | 0.00 | 0.49 | 0.06 | 4 | Macrophage |
| <i>GM2A</i>     | 1.47 | 0.00 | 0.00 | 0.39 | 0.05 | 4 | Macrophage |
| <i>GPX1</i>     | 1.47 | 0.00 | 0.00 | 0.84 | 0.40 | 4 | Macrophage |
| <i>CSF2RA</i>   | 1.46 | 0.00 | 0.00 | 0.34 | 0.03 | 4 | Macrophage |
| <i>CEBPB</i>    | 1.45 | 0.00 | 0.00 | 0.36 | 0.07 | 4 | Macrophage |
| <i>CFP</i>      | 1.44 | 0.00 | 0.00 | 0.31 | 0.02 | 4 | Macrophage |
| <i>COTL1</i>    | 1.44 | 0.00 | 0.00 | 0.56 | 0.13 | 4 | Macrophage |
| <i>GNGT2</i>    | 1.44 | 0.00 | 0.00 | 0.33 | 0.08 | 4 | Macrophage |
| <i>CD44</i>     | 1.43 | 0.00 | 0.00 | 0.57 | 0.17 | 4 | Macrophage |
| <i>PTPN6</i>    | 1.43 | 0.00 | 0.00 | 0.42 | 0.05 | 4 | Macrophage |
| <i>NCF2</i>     | 1.43 | 0.00 | 0.00 | 0.33 | 0.01 | 4 | Macrophage |
| <i>FOS</i>      | 1.42 | 0.00 | 0.00 | 0.48 | 0.14 | 4 | Macrophage |
| <i>ITGAL</i>    | 1.42 | 0.00 | 0.00 | 0.27 | 0.02 | 4 | Macrophage |
| <i>TPD52</i>    | 1.40 | 0.00 | 0.00 | 0.38 | 0.07 | 4 | Macrophage |
| <i>NCF1</i>     | 1.39 | 0.00 | 0.00 | 0.36 | 0.03 | 4 | Macrophage |

|                 |      |      |      |      |      |   |            |
|-----------------|------|------|------|------|------|---|------------|
| <i>HCLS1</i>    | 1.39 | 0.00 | 0.00 | 0.39 | 0.04 | 4 | Macrophage |
| <i>SNX10</i>    | 1.39 | 0.00 | 0.00 | 0.31 | 0.02 | 4 | Macrophage |
| <i>TALDO1</i>   | 1.37 | 0.00 | 0.00 | 0.65 | 0.23 | 4 | Macrophage |
| <i>ARHGDIB</i>  | 1.37 | 0.00 | 0.00 | 0.60 | 0.12 | 4 | Macrophage |
| <i>CCR1</i>     | 1.36 | 0.00 | 0.00 | 0.27 | 0.01 | 4 | Macrophage |
| <i>IFITM2</i>   | 1.33 | 0.00 | 0.00 | 0.31 | 0.06 | 4 | Macrophage |
| <i>LY86</i>     | 1.33 | 0.00 | 0.00 | 0.34 | 0.03 | 4 | Macrophage |
| <i>CYTIP</i>    | 1.31 | 0.00 | 0.00 | 0.37 | 0.06 | 4 | Macrophage |
| <i>CTSC</i>     | 1.29 | 0.00 | 0.00 | 0.53 | 0.17 | 4 | Macrophage |
| <i>MARCH1</i>   | 1.28 | 0.00 | 0.00 | 0.26 | 0.01 | 4 | Macrophage |
| <i>FAM49B</i>   | 1.28 | 0.00 | 0.00 | 0.40 | 0.07 | 4 | Macrophage |
| <i>FGR</i>      | 1.28 | 0.00 | 0.00 | 0.25 | 0.01 | 4 | Macrophage |
| <i>ARPC1B</i>   | 1.27 | 0.00 | 0.00 | 0.73 | 0.33 | 4 | Macrophage |
| <i>FAM111A</i>  | 1.26 | 0.00 | 0.00 | 0.43 | 0.11 | 4 | Macrophage |
| <i>HCK</i>      | 1.26 | 0.00 | 0.00 | 0.27 | 0.02 | 4 | Macrophage |
| <i>CD84</i>     | 1.26 | 0.00 | 0.00 | 0.28 | 0.02 | 4 | Macrophage |
| <i>IL6R</i>     | 1.25 | 0.00 | 0.00 | 0.34 | 0.05 | 4 | Macrophage |
| <i>CORO2A</i>   | 1.24 | 0.00 | 0.00 | 0.29 | 0.03 | 4 | Macrophage |
| <i>FTH1</i>     | 1.24 | 0.00 | 0.00 | 0.93 | 0.81 | 4 | Macrophage |
| <i>PLIN2</i>    | 1.23 | 0.00 | 0.00 | 0.37 | 0.10 | 4 | Macrophage |
| <i>ITGA4</i>    | 1.22 | 0.00 | 0.00 | 0.33 | 0.07 | 4 | Macrophage |
| <i>CASP1</i>    | 1.21 | 0.00 | 0.00 | 0.25 | 0.02 | 4 | Macrophage |
| <i>CD302</i>    | 1.20 | 0.00 | 0.00 | 0.41 | 0.12 | 4 | Macrophage |
| <i>CDK2AP2</i>  | 1.20 | 0.00 | 0.00 | 0.39 | 0.12 | 4 | Macrophage |
| <i>PRKCD</i>    | 1.20 | 0.00 | 0.00 | 0.37 | 0.08 | 4 | Macrophage |
| <i>PTPRE</i>    | 1.17 | 0.00 | 0.00 | 0.30 | 0.04 | 4 | Macrophage |
| <i>LSP1</i>     | 1.17 | 0.00 | 0.00 | 0.56 | 0.15 | 4 | Macrophage |
| <i>EFHD2</i>    | 1.17 | 0.00 | 0.00 | 0.32 | 0.06 | 4 | Macrophage |
| <i>EMB</i>      | 1.17 | 0.00 | 0.00 | 0.35 | 0.08 | 4 | Macrophage |
| <i>UNC93B1</i>  | 1.16 | 0.00 | 0.00 | 0.31 | 0.04 | 4 | Macrophage |
| <i>PTPN18</i>   | 1.14 | 0.00 | 0.00 | 0.42 | 0.10 | 4 | Macrophage |
| <i>TMSB4X</i>   | 1.12 | 0.00 | 0.00 | 0.99 | 0.89 | 4 | Macrophage |
| <i>CD53</i>     | 1.11 | 0.00 | 0.00 | 0.38 | 0.06 | 4 | Macrophage |
| <i>PYCARD</i>   | 1.11 | 0.00 | 0.00 | 0.34 | 0.07 | 4 | Macrophage |
| <i>APRT</i>     | 1.10 | 0.00 | 0.00 | 0.45 | 0.16 | 4 | Macrophage |
| <i>BAZ1A</i>    | 1.09 | 0.00 | 0.00 | 0.35 | 0.11 | 4 | Macrophage |
| <i>ITGAM</i>    | 1.09 | 0.00 | 0.00 | 0.53 | 0.23 | 4 | Macrophage |
| <i>PTPN1</i>    | 1.09 | 0.00 | 0.00 | 0.44 | 0.17 | 4 | Macrophage |
| <i>CTSZ</i>     | 1.08 | 0.00 | 0.00 | 0.39 | 0.13 | 4 | Macrophage |
| <i>PSMB8</i>    | 1.07 | 0.00 | 0.00 | 0.48 | 0.16 | 4 | Macrophage |
| <i>SMPDL3A</i>  | 1.05 | 0.00 | 0.00 | 0.31 | 0.09 | 4 | Macrophage |
| <i>RGS2</i>     | 1.02 | 0.00 | 0.00 | 0.60 | 0.24 | 4 | Macrophage |
| <i>SH3BGR13</i> | 1.01 | 0.00 | 0.00 | 0.64 | 0.33 | 4 | Macrophage |

|                |      |      |      |      |      |   |            |
|----------------|------|------|------|------|------|---|------------|
| <i>ARID3A</i>  | 1.01 | 0.00 | 0.00 | 0.30 | 0.08 | 4 | Macrophage |
| <i>FERMT3</i>  | 1.01 | 0.00 | 0.00 | 0.28 | 0.04 | 4 | Macrophage |
| <i>CAPG</i>    | 0.98 | 0.00 | 0.00 | 0.31 | 0.08 | 4 | Macrophage |
| <i>ACTR3</i>   | 0.96 | 0.00 | 0.00 | 0.61 | 0.30 | 4 | Macrophage |
| <i>LYN</i>     | 0.96 | 0.00 | 0.00 | 0.34 | 0.10 | 4 | Macrophage |
| <i>ACTR2</i>   | 0.96 | 0.00 | 0.00 | 0.53 | 0.25 | 4 | Macrophage |
| <i>ARPC5</i>   | 0.96 | 0.00 | 0.00 | 0.83 | 0.55 | 4 | Macrophage |
| <i>ARPC2</i>   | 0.92 | 0.00 | 0.00 | 0.84 | 0.60 | 4 | Macrophage |
| <i>RAC2</i>    | 0.81 | 0.00 | 0.00 | 0.35 | 0.08 | 4 | Macrophage |
| <i>B2M</i>     | 0.79 | 0.00 | 0.00 | 0.89 | 0.68 | 4 | Macrophage |
| <i>S100A6</i>  | 0.78 | 0.00 | 0.00 | 0.71 | 0.32 | 4 | Macrophage |
| <i>FAU</i>     | 0.69 | 0.00 | 0.00 | 0.96 | 0.87 | 4 | Macrophage |
| <i>GMFG</i>    | 0.86 | 0.00 | 0.00 | 0.38 | 0.13 | 4 | Macrophage |
| <i>ZFP36L2</i> | 0.95 | 0.00 | 0.00 | 0.36 | 0.12 | 4 | Macrophage |
| <i>IFNGR1</i>  | 1.00 | 0.00 | 0.00 | 0.47 | 0.21 | 4 | Macrophage |
| <i>CTSA</i>    | 0.95 | 0.00 | 0.00 | 0.33 | 0.11 | 4 | Macrophage |
| <i>EMP3</i>    | 0.99 | 0.00 | 0.00 | 0.48 | 0.22 | 4 | Macrophage |
| <i>CREG1</i>   | 0.98 | 0.00 | 0.00 | 0.39 | 0.15 | 4 | Macrophage |
| <i>LRRC58</i>  | 0.53 | 0.00 | 0.00 | 0.94 | 0.85 | 4 | Macrophage |
| <i>CAPZA2</i>  | 0.86 | 0.00 | 0.00 | 0.59 | 0.34 | 4 | Macrophage |
| <i>AKAP13</i>  | 0.91 | 0.00 | 0.00 | 0.50 | 0.24 | 4 | Macrophage |
| <i>CTSD</i>    | 1.29 | 0.00 | 0.00 | 0.46 | 0.23 | 4 | Macrophage |
| <i>ATP6V0C</i> | 0.98 | 0.00 | 0.00 | 0.44 | 0.21 | 4 | Macrophage |
| <i>RPS27A</i>  | 0.47 | 0.00 | 0.00 | 0.90 | 0.77 | 4 | Macrophage |
| <i>JUNB</i>    | 0.93 | 0.00 | 0.00 | 0.42 | 0.19 | 4 | Macrophage |
| <i>LLPH</i>    | 0.90 | 0.00 | 0.00 | 0.53 | 0.29 | 4 | Macrophage |
| <i>LRP1</i>    | 0.84 | 0.00 | 0.00 | 0.30 | 0.10 | 4 | Macrophage |
| <i>TPM3</i>    | 0.55 | 0.00 | 0.00 | 0.84 | 0.65 | 4 | Macrophage |
| <i>WDR89</i>   | 0.44 | 0.00 | 0.00 | 0.92 | 0.81 | 4 | Macrophage |
| <i>ZFP36</i>   | 0.94 | 0.00 | 0.00 | 0.35 | 0.14 | 4 | Macrophage |
| <i>PSMB10</i>  | 0.81 | 0.00 | 0.00 | 0.33 | 0.12 | 4 | Macrophage |
| <i>S100A11</i> | 0.85 | 0.00 | 0.00 | 0.67 | 0.48 | 4 | Macrophage |
| <i>CLTA</i>    | 0.75 | 0.00 | 0.00 | 0.63 | 0.41 | 4 | Macrophage |
| <i>BTG1</i>    | 0.89 | 0.00 | 0.00 | 0.52 | 0.28 | 4 | Macrophage |
| <i>CORO1B</i>  | 0.82 | 0.00 | 0.00 | 0.45 | 0.22 | 4 | Macrophage |
| <i>PPT1</i>    | 0.85 | 0.00 | 0.00 | 0.31 | 0.11 | 4 | Macrophage |
| <i>TKT</i>     | 0.84 | 0.00 | 0.00 | 0.33 | 0.13 | 4 | Macrophage |
| <i>STAT1</i>   | 0.91 | 0.00 | 0.00 | 0.26 | 0.09 | 4 | Macrophage |
| <i>SERP1</i>   | 0.80 | 0.00 | 0.00 | 0.45 | 0.22 | 4 | Macrophage |
| <i>SEC11C</i>  | 0.79 | 0.00 | 0.00 | 0.35 | 0.15 | 4 | Macrophage |
| <i>IQGAP1</i>  | 0.70 | 0.00 | 0.00 | 0.64 | 0.41 | 4 | Macrophage |
| <i>CRIP1</i>   | 0.78 | 0.00 | 0.00 | 0.66 | 0.46 | 4 | Macrophage |
| <i>PFN1</i>    | 0.67 | 0.00 | 0.00 | 0.67 | 0.47 | 4 | Macrophage |

|                 |      |      |      |      |      |   |            |
|-----------------|------|------|------|------|------|---|------------|
| <i>ARPC4</i>    | 0.77 | 0.00 | 0.00 | 0.37 | 0.17 | 4 | Macrophage |
| <i>CCDC88A</i>  | 0.86 | 0.00 | 0.00 | 0.42 | 0.21 | 4 | Macrophage |
| <i>ANXA1</i>    | 0.85 | 0.00 | 0.00 | 0.39 | 0.18 | 4 | Macrophage |
| <i>SRGN</i>     | 0.73 | 0.00 | 0.00 | 0.55 | 0.30 | 4 | Macrophage |
| <i>ENO1</i>     | 0.79 | 0.00 | 0.00 | 0.37 | 0.17 | 4 | Macrophage |
| <i>PSMA7</i>    | 0.65 | 0.00 | 0.00 | 0.71 | 0.56 | 4 | Macrophage |
| <i>PTBP3</i>    | 0.71 | 0.00 | 0.00 | 0.53 | 0.31 | 4 | Macrophage |
| <i>RHOG</i>     | 0.75 | 0.00 | 0.00 | 0.27 | 0.10 | 4 | Macrophage |
| <i>CSTB</i>     | 1.29 | 0.00 | 0.00 | 0.46 | 0.27 | 4 | Macrophage |
| <i>GNS</i>      | 0.82 | 0.00 | 0.00 | 0.27 | 0.10 | 4 | Macrophage |
| <i>PSME2</i>    | 0.79 | 0.00 | 0.00 | 0.44 | 0.24 | 4 | Macrophage |
| <i>UCP2</i>     | 0.73 | 0.00 | 0.00 | 0.27 | 0.10 | 4 | Macrophage |
| <i>PKM</i>      | 0.80 | 0.00 | 0.00 | 0.41 | 0.22 | 4 | Macrophage |
| <i>GNAI2</i>    | 0.60 | 0.00 | 0.00 | 0.58 | 0.37 | 4 | Macrophage |
| <i>ATOX1</i>    | 0.75 | 0.00 | 0.00 | 0.54 | 0.36 | 4 | Macrophage |
| <i>ATP6V1B2</i> | 0.76 | 0.00 | 0.00 | 0.28 | 0.11 | 4 | Macrophage |
| <i>REEP5</i>    | 0.75 | 0.00 | 0.00 | 0.42 | 0.23 | 4 | Macrophage |
| <i>OSTF1</i>    | 0.66 | 0.00 | 0.00 | 0.43 | 0.24 | 4 | Macrophage |
| <i>STK38</i>    | 0.72 | 0.00 | 0.00 | 0.34 | 0.17 | 4 | Macrophage |
| <i>POMP</i>     | 0.67 | 0.00 | 0.00 | 0.50 | 0.32 | 4 | Macrophage |
| <i>TMED5</i>    | 0.69 | 0.00 | 0.00 | 0.32 | 0.14 | 4 | Macrophage |
| <i>LY6E</i>     | 0.53 | 0.00 | 0.00 | 0.62 | 0.41 | 4 | Macrophage |
| <i>ATP6V1E1</i> | 0.79 | 0.00 | 0.00 | 0.42 | 0.24 | 4 | Macrophage |
| <i>AHNAK</i>    | 0.59 | 0.00 | 0.00 | 0.60 | 0.42 | 4 | Macrophage |
| <i>MRPL33</i>   | 0.72 | 0.00 | 0.00 | 0.46 | 0.28 | 4 | Macrophage |
| <i>RPLP2</i>    | 0.32 | 0.00 | 0.00 | 0.91 | 0.82 | 4 | Macrophage |
| <i>ATP6V0B</i>  | 0.68 | 0.00 | 0.00 | 0.36 | 0.19 | 4 | Macrophage |
| <i>M6PR</i>     | 0.72 | 0.00 | 0.00 | 0.39 | 0.22 | 4 | Macrophage |
| <i>LRRFIP1</i>  | 0.64 | 0.00 | 0.00 | 0.42 | 0.24 | 4 | Macrophage |
| <i>MYCBP2</i>   | 0.66 | 0.00 | 0.00 | 0.38 | 0.21 | 4 | Macrophage |
| <i>DBI</i>      | 0.64 | 0.00 | 0.00 | 0.53 | 0.36 | 4 | Macrophage |
| <i>GABARAP</i>  | 0.60 | 0.00 | 0.00 | 0.58 | 0.43 | 4 | Macrophage |
| <i>CAPZB</i>    | 0.57 | 0.00 | 0.00 | 0.58 | 0.42 | 4 | Macrophage |
| <i>ARPC3</i>    | 0.63 | 0.00 | 0.00 | 0.44 | 0.27 | 4 | Macrophage |
| <i>TSPO</i>     | 0.69 | 0.00 | 0.00 | 0.41 | 0.25 | 4 | Macrophage |
| <i>ERP29</i>    | 0.64 | 0.00 | 0.00 | 0.42 | 0.25 | 4 | Macrophage |
| <i>CD47</i>     | 0.57 | 0.00 | 0.00 | 0.57 | 0.40 | 4 | Macrophage |
| <i>DUSP6</i>    | 0.70 | 0.00 | 0.00 | 0.33 | 0.17 | 4 | Macrophage |
| <i>RAP1B</i>    | 0.68 | 0.00 | 0.00 | 0.39 | 0.23 | 4 | Macrophage |
| <i>HSPA8</i>    | 0.45 | 0.00 | 0.00 | 0.77 | 0.67 | 4 | Macrophage |
| <i>COX4I1</i>   | 0.40 | 0.00 | 0.00 | 0.81 | 0.74 | 4 | Macrophage |
| <i>ANXA2</i>    | 0.55 | 0.00 | 0.00 | 0.62 | 0.48 | 4 | Macrophage |
| <i>SKAP2</i>    | 0.61 | 0.00 | 0.00 | 0.27 | 0.13 | 4 | Macrophage |

|                 |      |      |      |      |      |   |            |
|-----------------|------|------|------|------|------|---|------------|
| <i>ACTG1</i>    | 0.33 | 0.00 | 0.00 | 0.86 | 0.77 | 4 | Macrophage |
| <i>CFL1</i>     | 0.44 | 0.00 | 0.00 | 0.71 | 0.60 | 4 | Macrophage |
| <i>GRB2</i>     | 0.58 | 0.00 | 0.00 | 0.31 | 0.16 | 4 | Macrophage |
| <i>SPPL2A</i>   | 0.62 | 0.00 | 0.00 | 0.27 | 0.13 | 4 | Macrophage |
| <i>ABRACL</i>   | 0.62 | 0.00 | 0.00 | 0.37 | 0.21 | 4 | Macrophage |
| <i>PSME1</i>    | 0.56 | 0.00 | 0.00 | 0.48 | 0.32 | 4 | Macrophage |
| <i>GLUD2</i>    | 0.63 | 0.00 | 0.00 | 0.28 | 0.14 | 4 | Macrophage |
| <i>LAMTOR4</i>  | 0.62 | 0.00 | 0.00 | 0.27 | 0.13 | 4 | Macrophage |
| <i>HMGB2</i>    | 0.55 | 0.00 | 0.00 | 0.53 | 0.37 | 4 | Macrophage |
| <i>C6orf62</i>  | 0.62 | 0.00 | 0.00 | 0.46 | 0.30 | 4 | Macrophage |
| <i>TOR1AIP1</i> | 0.60 | 0.00 | 0.00 | 0.31 | 0.16 | 4 | Macrophage |
| <i>MSN</i>      | 0.44 | 0.00 | 0.00 | 0.60 | 0.43 | 4 | Macrophage |
| <i>ANP32B</i>   | 0.59 | 0.00 | 0.00 | 0.60 | 0.47 | 4 | Macrophage |
| <i>VAMP8</i>    | 0.45 | 0.00 | 0.00 | 0.49 | 0.32 | 4 | Macrophage |
| <i>KLF6</i>     | 0.49 | 0.00 | 0.00 | 0.50 | 0.34 | 4 | Macrophage |
| <i>ASAH1</i>    | 0.58 | 0.00 | 0.00 | 0.26 | 0.13 | 4 | Macrophage |
| <i>KLF4</i>     | 0.47 | 0.00 | 0.00 | 0.38 | 0.22 | 4 | Macrophage |
| <i>RPL37A</i>   | 0.27 | 0.00 | 0.00 | 0.90 | 0.84 | 4 | Macrophage |
| <i>BOLA2</i>    | 0.60 | 0.00 | 0.00 | 0.26 | 0.14 | 4 | Macrophage |
| <i>SLK</i>      | 0.43 | 0.00 | 0.00 | 0.55 | 0.39 | 4 | Macrophage |
| <i>LMO4</i>     | 0.60 | 0.00 | 0.00 | 0.39 | 0.25 | 4 | Macrophage |
| <i>TAOK3</i>    | 0.54 | 0.00 | 0.00 | 0.31 | 0.17 | 4 | Macrophage |
| <i>CELF2</i>    | 0.49 | 0.00 | 0.00 | 0.41 | 0.26 | 4 | Macrophage |
| <i>CLIC1</i>    | 0.46 | 0.00 | 0.00 | 0.52 | 0.38 | 4 | Macrophage |
| <i>TAPBP</i>    | 0.57 | 0.00 | 0.00 | 0.27 | 0.14 | 4 | Macrophage |
| <i>FAM32A</i>   | 0.60 | 0.00 | 0.00 | 0.37 | 0.23 | 4 | Macrophage |
| <i>ARHGAP17</i> | 0.57 | 0.00 | 0.00 | 0.28 | 0.15 | 4 | Macrophage |
| <i>MGST1</i>    | 0.51 | 0.00 | 0.00 | 0.31 | 0.17 | 4 | Macrophage |
| <i>KLF13</i>    | 0.54 | 0.00 | 0.00 | 0.27 | 0.15 | 4 | Macrophage |
| <i>H2AFY</i>    | 0.54 | 0.00 | 0.00 | 0.32 | 0.20 | 4 | Macrophage |
| <i>CMIP</i>     | 0.51 | 0.00 | 0.00 | 0.30 | 0.18 | 4 | Macrophage |
| <i>ARID4A</i>   | 0.54 | 0.00 | 0.00 | 0.39 | 0.26 | 4 | Macrophage |
| <i>PAK2</i>     | 0.48 | 0.00 | 0.00 | 0.40 | 0.27 | 4 | Macrophage |
| <i>LAMP1</i>    | 0.49 | 0.00 | 0.00 | 0.53 | 0.42 | 4 | Macrophage |
| <i>SUB1</i>     | 0.37 | 0.00 | 0.00 | 0.62 | 0.51 | 4 | Macrophage |
| <i>BTG2</i>     | 0.63 | 0.00 | 0.00 | 0.33 | 0.21 | 4 | Macrophage |
| <i>COX6B1</i>   | 0.37 | 0.00 | 0.00 | 0.66 | 0.58 | 4 | Macrophage |
| <i>LAMTOR2</i>  | 0.52 | 0.00 | 0.00 | 0.26 | 0.15 | 4 | Macrophage |
| <i>CMPK1</i>    | 0.54 | 0.00 | 0.00 | 0.32 | 0.21 | 4 | Macrophage |
| <i>PRPF40A</i>  | 0.49 | 0.00 | 0.00 | 0.42 | 0.30 | 4 | Macrophage |
| <i>ZNHIT1</i>   | 0.50 | 0.00 | 0.00 | 0.25 | 0.15 | 4 | Macrophage |
| <i>CCDC12</i>   | 0.50 | 0.00 | 0.00 | 0.29 | 0.18 | 4 | Macrophage |
| <i>COX7B</i>    | 0.42 | 0.00 | 0.00 | 0.56 | 0.47 | 4 | Macrophage |

|                       |      |      |      |      |      |   |            |
|-----------------------|------|------|------|------|------|---|------------|
| <i>FLNA</i>           | 0.45 | 0.00 | 0.00 | 0.36 | 0.24 | 4 | Macrophage |
| <i>NME1</i>           | 0.49 | 0.00 | 0.00 | 0.29 | 0.18 | 4 | Macrophage |
| <i>YWHAZ</i>          | 0.41 | 0.00 | 0.00 | 0.59 | 0.49 | 4 | Macrophage |
| <i>TSC22D4</i>        | 0.48 | 0.00 | 0.00 | 0.36 | 0.25 | 4 | Macrophage |
| <i>PTP4A2</i>         | 0.40 | 0.00 | 0.00 | 0.52 | 0.40 | 4 | Macrophage |
| <i>ALDOA</i>          | 0.51 | 0.00 | 0.00 | 0.33 | 0.22 | 4 | Macrophage |
| <i>SLC25A5</i>        | 0.34 | 0.00 | 0.00 | 0.67 | 0.58 | 4 | Macrophage |
| <i>IRF2</i>           | 0.50 | 0.00 | 0.00 | 0.33 | 0.22 | 4 | Macrophage |
| <i>ATP6V0E1</i>       | 0.47 | 0.00 | 0.00 | 0.33 | 0.22 | 4 | Macrophage |
| <i>RAP1A</i>          | 0.47 | 0.00 | 0.00 | 0.41 | 0.29 | 4 | Macrophage |
| <i>S100A10</i>        | 0.41 | 0.00 | 0.00 | 0.51 | 0.40 | 4 | Macrophage |
| <i>EIF3A</i>          | 0.39 | 0.00 | 0.00 | 0.66 | 0.58 | 4 | Macrophage |
| <i>COX17</i>          | 0.52 | 0.00 | 0.00 | 0.35 | 0.24 | 4 | Macrophage |
| <i>CHMP4B</i>         | 0.52 | 0.00 | 0.00 | 0.30 | 0.20 | 4 | Macrophage |
| <i>DAZAP2</i>         | 0.44 | 0.00 | 0.00 | 0.32 | 0.21 | 4 | Macrophage |
| <i>ZBTB7A</i>         | 0.46 | 0.00 | 0.00 | 0.28 | 0.18 | 4 | Macrophage |
| <i>H2AFZ</i>          | 0.43 | 0.00 | 0.00 | 0.50 | 0.40 | 4 | Macrophage |
| <i>RBM25</i>          | 0.35 | 0.00 | 0.00 | 0.73 | 0.66 | 4 | Macrophage |
| <i>NSA2</i>           | 0.45 | 0.00 | 0.00 | 0.40 | 0.29 | 4 | Macrophage |
| <i>RNH1</i>           | 0.50 | 0.00 | 0.00 | 0.26 | 0.17 | 4 | Macrophage |
| <i>H3F3A</i>          | 0.30 | 0.00 | 0.00 | 0.69 | 0.62 | 4 | Macrophage |
| <i>TMEM14C</i>        | 0.48 | 0.00 | 0.00 | 0.32 | 0.22 | 4 | Macrophage |
| <i>SERF2</i>          | 0.32 | 0.00 | 0.00 | 0.66 | 0.59 | 4 | Macrophage |
| <i>ATG3</i>           | 0.43 | 0.00 | 0.00 | 0.27 | 0.17 | 4 | Macrophage |
| <i>CDC42SE1</i>       | 0.46 | 0.00 | 0.00 | 0.27 | 0.18 | 4 | Macrophage |
| <i>EIF5B</i>          | 0.37 | 0.00 | 0.00 | 0.58 | 0.50 | 4 | Macrophage |
| <i>SDCBP</i>          | 0.48 | 0.00 | 0.00 | 0.38 | 0.28 | 4 | Macrophage |
| <i>TMEM256-PLSCR3</i> | 0.41 | 0.00 | 0.00 | 0.40 | 0.30 | 4 | Macrophage |
| <i>ETFB</i>           | 0.47 | 0.00 | 0.00 | 0.37 | 0.27 | 4 | Macrophage |
| <i>EIF5A</i>          | 0.39 | 0.00 | 0.00 | 0.42 | 0.33 | 4 | Macrophage |
| <i>ATP6V1F</i>        | 0.41 | 0.00 | 0.00 | 0.34 | 0.25 | 4 | Macrophage |
| <i>VASP</i>           | 0.42 | 0.00 | 0.00 | 0.28 | 0.19 | 4 | Macrophage |
| <i>RNF103-CHMP3</i>   | 0.45 | 0.00 | 0.00 | 0.27 | 0.18 | 4 | Macrophage |
| <i>DDX21</i>          | 0.40 | 0.00 | 0.00 | 0.34 | 0.25 | 4 | Macrophage |
| <i>GDI2</i>           | 0.39 | 0.00 | 0.00 | 0.41 | 0.33 | 4 | Macrophage |
| <i>DEK</i>            | 0.39 | 0.00 | 0.00 | 0.54 | 0.47 | 4 | Macrophage |
| <i>PRDX1</i>          | 0.41 | 0.00 | 0.00 | 0.57 | 0.51 | 4 | Macrophage |
| <i>MBNL1</i>          | 0.33 | 0.00 | 0.00 | 0.34 | 0.25 | 4 | Macrophage |
| <i>NFE2L2</i>         | 0.44 | 0.00 | 0.00 | 0.33 | 0.25 | 4 | Macrophage |
| <i>NFKBIA</i>         | 0.42 | 0.00 | 0.00 | 0.44 | 0.36 | 4 | Macrophage |
| <i>UBL3</i>           | 0.39 | 0.00 | 0.00 | 0.26 | 0.18 | 4 | Macrophage |
| <i>WDR26</i>          | 0.40 | 0.00 | 0.00 | 0.32 | 0.24 | 4 | Macrophage |
| <i>UQCRCQ</i>         | 0.35 | 0.00 | 0.00 | 0.44 | 0.36 | 4 | Macrophage |

|                 |      |      |      |      |      |   |            |
|-----------------|------|------|------|------|------|---|------------|
| <i>RHOA</i>     | 0.28 | 0.00 | 0.00 | 0.55 | 0.48 | 4 | Macrophage |
| <i>HNRNPM</i>   | 0.33 | 0.00 | 0.00 | 0.55 | 0.48 | 4 | Macrophage |
| <i>UTP3</i>     | 0.39 | 0.00 | 0.00 | 0.27 | 0.19 | 4 | Macrophage |
| <i>SH3GLB1</i>  | 0.31 | 0.00 | 0.00 | 0.46 | 0.38 | 4 | Macrophage |
| <i>CHMP2A</i>   | 0.35 | 0.00 | 0.00 | 0.40 | 0.32 | 4 | Macrophage |
| <i>MTPN</i>     | 0.38 | 0.00 | 0.00 | 0.33 | 0.25 | 4 | Macrophage |
| <i>RRBP1</i>    | 0.28 | 0.00 | 0.00 | 0.60 | 0.54 | 4 | Macrophage |
| <i>RBM3</i>     | 0.32 | 0.00 | 0.00 | 0.47 | 0.41 | 4 | Macrophage |
| <i>ARPP19</i>   | 0.38 | 0.00 | 0.00 | 0.36 | 0.29 | 4 | Macrophage |
| <i>SEC61B</i>   | 0.30 | 0.00 | 0.00 | 0.54 | 0.48 | 4 | Macrophage |
| <i>MTDH</i>     | 0.32 | 0.00 | 0.00 | 0.54 | 0.48 | 4 | Macrophage |
| <i>ATP1B3</i>   | 0.32 | 0.00 | 0.00 | 0.34 | 0.25 | 4 | Macrophage |
| <i>CAST</i>     | 0.38 | 0.00 | 0.00 | 0.27 | 0.19 | 4 | Macrophage |
| <i>ATP6V0D1</i> | 0.35 | 0.00 | 0.00 | 0.25 | 0.18 | 4 | Macrophage |
| <i>DNAJC2</i>   | 0.36 | 0.00 | 0.00 | 0.26 | 0.18 | 4 | Macrophage |
| <i>CCNL1</i>    | 0.32 | 0.00 | 0.00 | 0.39 | 0.31 | 4 | Macrophage |
| <i>ABI1</i>     | 0.35 | 0.00 | 0.00 | 0.28 | 0.20 | 4 | Macrophage |
| <i>CDC5L</i>    | 0.39 | 0.00 | 0.00 | 0.28 | 0.20 | 4 | Macrophage |
| <i>ADIPOR1</i>  | 0.36 | 0.00 | 0.00 | 0.29 | 0.22 | 4 | Macrophage |
| <i>BRK1</i>     | 0.31 | 0.00 | 0.00 | 0.36 | 0.29 | 4 | Macrophage |
| <i>COX8A</i>    | 0.27 | 0.00 | 0.00 | 0.60 | 0.56 | 4 | Macrophage |
| <i>GAPDH</i>    | 0.43 | 0.00 | 0.00 | 0.26 | 0.19 | 4 | Macrophage |
| <i>ATP6V1G1</i> | 0.36 | 0.00 | 0.00 | 0.40 | 0.34 | 4 | Macrophage |
| <i>SRP9</i>     | 0.34 | 0.00 | 0.00 | 0.37 | 0.30 | 4 | Macrophage |
| <i>CFLAR</i>    | 0.30 | 0.00 | 0.00 | 0.26 | 0.19 | 4 | Macrophage |
| <i>NDUFA1</i>   | 0.30 | 0.00 | 0.00 | 0.39 | 0.33 | 4 | Macrophage |
| <i>NDUFB7</i>   | 0.33 | 0.00 | 0.00 | 0.36 | 0.30 | 4 | Macrophage |
| <i>ROCK1</i>    | 0.30 | 0.00 | 0.00 | 0.40 | 0.33 | 4 | Macrophage |
| <i>TMA7</i>     | 0.26 | 0.00 | 0.00 | 0.41 | 0.35 | 4 | Macrophage |
| <i>NDUFA3</i>   | 0.27 | 0.00 | 0.00 | 0.47 | 0.42 | 4 | Macrophage |
| <i>EIF2S2</i>   | 0.29 | 0.00 | 0.00 | 0.51 | 0.47 | 4 | Macrophage |
| <i>TOMM22</i>   | 0.27 | 0.00 | 0.00 | 0.32 | 0.26 | 4 | Macrophage |
| <i>PSMA4</i>    | 0.28 | 0.00 | 0.00 | 0.39 | 0.33 | 4 | Macrophage |
| <i>FKBP2</i>    | 0.29 | 0.00 | 0.00 | 0.25 | 0.19 | 4 | Macrophage |
| <i>PPIG</i>     | 0.27 | 0.00 | 0.00 | 0.44 | 0.39 | 4 | Macrophage |
| <i>NDUFB3</i>   | 0.27 | 0.00 | 0.00 | 0.36 | 0.31 | 4 | Macrophage |
| <i>SNRPB2</i>   | 0.26 | 0.00 | 0.00 | 0.31 | 0.25 | 4 | Macrophage |
| <i>ABCF1</i>    | 0.28 | 0.00 | 0.00 | 0.33 | 0.27 | 4 | Macrophage |
| <i>SMDT1</i>    | 0.27 | 0.00 | 0.00 | 0.34 | 0.29 | 4 | Macrophage |
| <i>NARS</i>     | 0.29 | 0.00 | 0.00 | 0.36 | 0.31 | 4 | Macrophage |
| <i>CYCS</i>     | 0.29 | 0.00 | 0.00 | 0.27 | 0.22 | 4 | Macrophage |
| <i>CALM3</i>    | 0.29 | 0.00 | 0.00 | 0.25 | 0.20 | 4 | Macrophage |
| <i>PRELID1</i>  | 0.25 | 0.00 | 0.00 | 0.34 | 0.30 | 4 | Macrophage |

|                 |      |      |      |      |      |   |             |
|-----------------|------|------|------|------|------|---|-------------|
| <i>C19orf53</i> | 0.28 | 0.00 | 0.00 | 0.33 | 0.29 | 4 | Macrophage  |
| <i>YWHAH</i>    | 0.25 | 0.00 | 0.00 | 0.30 | 0.26 | 4 | Macrophage  |
| <i>CWC15</i>    | 0.26 | 0.00 | 0.00 | 0.34 | 0.29 | 4 | Macrophage  |
| <i>MIER1</i>    | 0.26 | 0.00 | 0.00 | 0.27 | 0.22 | 4 | Macrophage  |
| <i>CCDC50</i>   | 0.26 | 0.00 | 0.00 | 0.30 | 0.25 | 4 | Macrophage  |
| <i>ESD</i>      | 0.31 | 0.00 | 0.00 | 0.27 | 0.22 | 4 | Macrophage  |
| <i>POLR1D</i>   | 0.26 | 0.00 | 0.00 | 0.32 | 0.28 | 4 | Macrophage  |
| <i>HSPA4</i>    | 0.27 | 0.00 | 0.00 | 0.26 | 0.22 | 4 | Macrophage  |
| <i>EIF3J</i>    | 0.26 | 0.00 | 0.00 | 0.35 | 0.31 | 4 | Macrophage  |
| <i>GGNBP2</i>   | 0.26 | 0.00 | 0.00 | 0.30 | 0.27 | 4 | Macrophage  |
| <i>PSMB4</i>    | 0.26 | 0.00 | 0.00 | 0.29 | 0.25 | 4 | Macrophage  |
| <i>SSU72</i>    | 0.25 | 0.00 | 0.00 | 0.26 | 0.22 | 4 | Macrophage  |
| <i>EDNRB</i>    | 2.25 | 0.00 | 0.00 | 0.76 | 0.12 | 5 | Endothelial |
| <i>KDR</i>      | 2.19 | 0.00 | 0.00 | 0.75 | 0.12 | 5 | Endothelial |
| <i>KITLG</i>    | 2.13 | 0.00 | 0.00 | 0.74 | 0.18 | 5 | Endothelial |
| <i>CYP4B1</i>   | 2.00 | 0.00 | 0.00 | 0.54 | 0.07 | 5 | Endothelial |
| <i>APLN</i>     | 1.97 | 0.00 | 0.00 | 0.46 | 0.02 | 5 | Endothelial |
| <i>CLDN5</i>    | 1.92 | 0.00 | 0.00 | 0.89 | 0.20 | 5 | Endothelial |
| <i>SCN7A</i>    | 1.77 | 0.00 | 0.00 | 0.80 | 0.26 | 5 | Endothelial |
| <i>CLEC1A</i>   | 1.69 | 0.00 | 0.00 | 0.68 | 0.13 | 5 | Endothelial |
| <i>TSPAN13</i>  | 1.64 | 0.00 | 0.00 | 0.73 | 0.21 | 5 | Endothelial |
| <i>ICAM2</i>    | 1.64 | 0.00 | 0.00 | 0.71 | 0.14 | 5 | Endothelial |
| <i>TBX3</i>     | 1.60 | 0.00 | 0.00 | 0.71 | 0.18 | 5 | Endothelial |
| <i>HPGD</i>     | 1.56 | 0.00 | 0.00 | 0.82 | 0.23 | 5 | Endothelial |
| <i>RAMP2</i>    | 1.56 | 0.00 | 0.00 | 0.91 | 0.26 | 5 | Endothelial |
| <i>ECSCR</i>    | 1.54 | 0.00 | 0.00 | 0.59 | 0.13 | 5 | Endothelial |
| <i>EMCN</i>     | 1.52 | 0.00 | 0.00 | 0.50 | 0.09 | 5 | Endothelial |
| <i>PMP22</i>    | 1.51 | 0.00 | 0.00 | 0.67 | 0.32 | 5 | Endothelial |
| <i>CDH5</i>     | 1.51 | 0.00 | 0.00 | 0.84 | 0.20 | 5 | Endothelial |
| <i>EGFL7</i>    | 1.50 | 0.00 | 0.00 | 0.93 | 0.25 | 5 | Endothelial |
| <i>CD34</i>     | 1.40 | 0.00 | 0.00 | 0.65 | 0.18 | 5 | Endothelial |
| <i>SEMA6A</i>   | 1.40 | 0.00 | 0.00 | 0.47 | 0.10 | 5 | Endothelial |
| <i>ESAM</i>     | 1.35 | 0.00 | 0.00 | 0.68 | 0.17 | 5 | Endothelial |
| <i>ACVRL1</i>   | 1.34 | 0.00 | 0.00 | 0.64 | 0.15 | 5 | Endothelial |
| <i>PECAM1</i>   | 1.34 | 0.00 | 0.00 | 0.81 | 0.22 | 5 | Endothelial |
| <i>IGFBP7</i>   | 1.33 | 0.00 | 0.00 | 0.77 | 0.41 | 5 | Endothelial |
| <i>TSPAN12</i>  | 1.32 | 0.00 | 0.00 | 0.34 | 0.05 | 5 | Endothelial |
| <i>TMEM100</i>  | 1.31 | 0.00 | 0.00 | 0.83 | 0.26 | 5 | Endothelial |
| <i>PCDH17</i>   | 1.31 | 0.00 | 0.00 | 0.69 | 0.18 | 5 | Endothelial |
| <i>EHD4</i>     | 1.29 | 0.00 | 0.00 | 0.68 | 0.24 | 5 | Endothelial |
| <i>TNFSF10</i>  | 1.28 | 0.00 | 0.00 | 0.40 | 0.08 | 5 | Endothelial |
| <i>MYCT1</i>    | 1.28 | 0.00 | 0.00 | 0.49 | 0.11 | 5 | Endothelial |
| <i>SLC9A3R2</i> | 1.26 | 0.00 | 0.00 | 0.66 | 0.20 | 5 | Endothelial |

|                 |      |      |      |      |      |   |             |
|-----------------|------|------|------|------|------|---|-------------|
| <i>RGS12</i>    | 1.25 | 0.00 | 0.00 | 0.44 | 0.10 | 5 | Endothelial |
| <i>NHLRC2</i>   | 1.24 | 0.00 | 0.00 | 0.33 | 0.06 | 5 | Endothelial |
| <i>S1PR1</i>    | 1.24 | 0.00 | 0.00 | 0.56 | 0.16 | 5 | Endothelial |
| <i>NRP1</i>     | 1.22 | 0.00 | 0.00 | 0.74 | 0.37 | 5 | Endothelial |
| <i>STMN2</i>    | 1.21 | 0.00 | 0.00 | 0.50 | 0.12 | 5 | Endothelial |
| <i>FLT1</i>     | 1.20 | 0.00 | 0.00 | 0.54 | 0.13 | 5 | Endothelial |
| <i>TMEM204</i>  | 1.20 | 0.00 | 0.00 | 0.51 | 0.14 | 5 | Endothelial |
| <i>CAV2</i>     | 1.19 | 0.00 | 0.00 | 0.59 | 0.20 | 5 | Endothelial |
| <i>MYZAP</i>    | 1.19 | 0.00 | 0.00 | 0.54 | 0.12 | 5 | Endothelial |
| <i>CYTH3</i>    | 1.18 | 0.00 | 0.00 | 0.54 | 0.21 | 5 | Endothelial |
| <i>PCDH1</i>    | 1.16 | 0.00 | 0.00 | 0.31 | 0.06 | 5 | Endothelial |
| <i>FMO1</i>     | 1.16 | 0.00 | 0.00 | 0.39 | 0.09 | 5 | Endothelial |
| <i>FKBP1A</i>   | 1.16 | 0.00 | 0.00 | 0.82 | 0.41 | 5 | Endothelial |
| <i>TSPAN7</i>   | 1.14 | 0.00 | 0.00 | 0.65 | 0.19 | 5 | Endothelial |
| <i>FOXF1</i>    | 1.14 | 0.00 | 0.00 | 0.46 | 0.11 | 5 | Endothelial |
| <i>PIEZO2</i>   | 1.13 | 0.00 | 0.00 | 0.37 | 0.10 | 5 | Endothelial |
| <i>AHR</i>      | 1.10 | 0.00 | 0.00 | 0.36 | 0.08 | 5 | Endothelial |
| <i>CCND1</i>    | 1.10 | 0.00 | 0.00 | 0.54 | 0.17 | 5 | Endothelial |
| <i>TSPAN18</i>  | 1.10 | 0.00 | 0.00 | 0.43 | 0.12 | 5 | Endothelial |
| <i>AFAP1L1</i>  | 1.07 | 0.00 | 0.00 | 0.52 | 0.15 | 5 | Endothelial |
| <i>KLF4</i>     | 1.07 | 0.00 | 0.00 | 0.60 | 0.21 | 5 | Endothelial |
| <i>EPAS1</i>    | 1.06 | 0.00 | 0.00 | 0.73 | 0.25 | 5 | Endothelial |
| <i>NOSTRIN</i>  | 1.05 | 0.00 | 0.00 | 0.47 | 0.13 | 5 | Endothelial |
| <i>RAPGEF5</i>  | 1.04 | 0.00 | 0.00 | 0.39 | 0.09 | 5 | Endothelial |
| <i>KLF7</i>     | 1.03 | 0.00 | 0.00 | 0.48 | 0.16 | 5 | Endothelial |
| <i>RIPPLY3</i>  | 1.03 | 0.00 | 0.00 | 0.40 | 0.10 | 5 | Endothelial |
| <i>CALCRL</i>   | 1.02 | 0.00 | 0.00 | 0.73 | 0.23 | 5 | Endothelial |
| <i>STXBP6</i>   | 1.02 | 0.00 | 0.00 | 0.28 | 0.04 | 5 | Endothelial |
| <i>JUN</i>      | 1.01 | 0.00 | 0.00 | 0.78 | 0.35 | 5 | Endothelial |
| <i>THBD</i>     | 1.01 | 0.00 | 0.00 | 0.59 | 0.23 | 5 | Endothelial |
| <i>ARHGAP29</i> | 1.01 | 0.00 | 0.00 | 0.57 | 0.21 | 5 | Endothelial |
| <i>TRIB2</i>    | 1.01 | 0.00 | 0.00 | 0.36 | 0.09 | 5 | Endothelial |
| <i>GATA2</i>    | 0.99 | 0.00 | 0.00 | 0.47 | 0.12 | 5 | Endothelial |
| <i>SLCO2A1</i>  | 0.99 | 0.00 | 0.00 | 0.39 | 0.10 | 5 | Endothelial |
| <i>LY6E</i>     | 0.98 | 0.00 | 0.00 | 0.85 | 0.40 | 5 | Endothelial |
| <i>ROBO4</i>    | 0.97 | 0.00 | 0.00 | 0.29 | 0.05 | 5 | Endothelial |
| <i>RCSD1</i>    | 0.97 | 0.00 | 0.00 | 0.34 | 0.07 | 5 | Endothelial |
| <i>PODXL</i>    | 0.95 | 0.00 | 0.00 | 0.37 | 0.09 | 5 | Endothelial |
| <i>GNG11</i>    | 0.95 | 0.00 | 0.00 | 0.66 | 0.29 | 5 | Endothelial |
| <i>GIMAP4</i>   | 0.93 | 0.00 | 0.00 | 0.53 | 0.16 | 5 | Endothelial |
| <i>ARHGEF3</i>  | 0.93 | 0.00 | 0.00 | 0.29 | 0.06 | 5 | Endothelial |
| <i>GIMAP6</i>   | 0.91 | 0.00 | 0.00 | 0.45 | 0.14 | 5 | Endothelial |
| <i>S100A16</i>  | 0.89 | 0.00 | 0.00 | 0.62 | 0.23 | 5 | Endothelial |

|                 |      |      |      |      |      |   |             |
|-----------------|------|------|------|------|------|---|-------------|
| <i>APP</i>      | 0.86 | 0.00 | 0.00 | 0.87 | 0.59 | 5 | Endothelial |
| <i>CLIC5</i>    | 0.82 | 0.00 | 0.00 | 0.57 | 0.20 | 5 | Endothelial |
| <i>MARCKS</i>   | 0.97 | 0.00 | 0.00 | 0.82 | 0.48 | 5 | Endothelial |
| <i>C1orf54</i>  | 0.86 | 0.00 | 0.00 | 0.65 | 0.27 | 5 | Endothelial |
| <i>TIE1</i>     | 0.85 | 0.00 | 0.00 | 0.38 | 0.10 | 5 | Endothelial |
| <i>TIMP3</i>    | 0.99 | 0.00 | 0.00 | 0.72 | 0.36 | 5 | Endothelial |
| <i>COL4A2</i>   | 0.86 | 0.00 | 0.00 | 0.77 | 0.43 | 5 | Endothelial |
| <i>RASIP1</i>   | 0.88 | 0.00 | 0.00 | 0.39 | 0.11 | 5 | Endothelial |
| <i>AQP1</i>     | 0.81 | 0.00 | 0.00 | 0.53 | 0.19 | 5 | Endothelial |
| <i>HSPA12B</i>  | 0.80 | 0.00 | 0.00 | 0.26 | 0.05 | 5 | Endothelial |
| <i>SCN3B</i>    | 0.97 | 0.00 | 0.00 | 0.27 | 0.06 | 5 | Endothelial |
| <i>CD36</i>     | 0.83 | 0.00 | 0.00 | 0.68 | 0.31 | 5 | Endothelial |
| <i>ITM2B</i>    | 0.79 | 0.00 | 0.00 | 0.90 | 0.76 | 5 | Endothelial |
| <i>CD200</i>    | 0.99 | 0.00 | 0.00 | 0.59 | 0.25 | 5 | Endothelial |
| <i>SPTBN1</i>   | 0.78 | 0.00 | 0.00 | 0.83 | 0.52 | 5 | Endothelial |
| <i>CCDC85B</i>  | 0.95 | 0.00 | 0.00 | 0.40 | 0.13 | 5 | Endothelial |
| <i>ARHGEF12</i> | 0.93 | 0.00 | 0.00 | 0.53 | 0.21 | 5 | Endothelial |
| <i>BST2</i>     | 1.06 | 0.00 | 0.00 | 0.41 | 0.14 | 5 | Endothelial |
| <i>LYVE1</i>    | 0.93 | 0.00 | 0.00 | 0.51 | 0.19 | 5 | Endothelial |
| <i>SGK1</i>     | 0.88 | 0.00 | 0.00 | 0.47 | 0.17 | 5 | Endothelial |
| <i>BTBD3</i>    | 1.02 | 0.00 | 0.00 | 0.39 | 0.13 | 5 | Endothelial |
| <i>JUP</i>      | 0.90 | 0.00 | 0.00 | 0.42 | 0.14 | 5 | Endothelial |
| <i>KIAA0355</i> | 0.87 | 0.00 | 0.00 | 0.45 | 0.16 | 5 | Endothelial |
| <i>IMPDH1</i>   | 0.92 | 0.00 | 0.00 | 0.27 | 0.07 | 5 | Endothelial |
| <i>COL4A1</i>   | 0.74 | 0.00 | 0.00 | 0.79 | 0.49 | 5 | Endothelial |
| <i>KANK3</i>    | 0.83 | 0.00 | 0.00 | 0.38 | 0.12 | 5 | Endothelial |
| <i>ARHGEF15</i> | 0.78 | 0.00 | 0.00 | 0.26 | 0.06 | 5 | Endothelial |
| <i>PPP1R16B</i> | 0.84 | 0.00 | 0.00 | 0.29 | 0.08 | 5 | Endothelial |
| <i>CAV1</i>     | 0.83 | 0.00 | 0.00 | 0.68 | 0.35 | 5 | Endothelial |
| <i>TMEM47</i>   | 1.07 | 0.00 | 0.00 | 0.31 | 0.10 | 5 | Endothelial |
| <i>BMPR2</i>    | 0.86 | 0.00 | 0.00 | 0.31 | 0.09 | 5 | Endothelial |
| <i>CYYR1</i>    | 0.71 | 0.00 | 0.00 | 0.39 | 0.13 | 5 | Endothelial |
| <i>CLEC14A</i>  | 0.63 | 0.00 | 0.00 | 0.46 | 0.17 | 5 | Endothelial |
| <i>CARHSP1</i>  | 0.87 | 0.00 | 0.00 | 0.38 | 0.14 | 5 | Endothelial |
| <i>TJP1</i>     | 0.82 | 0.00 | 0.00 | 0.42 | 0.16 | 5 | Endothelial |
| <i>USHBP1</i>   | 0.76 | 0.00 | 0.00 | 0.28 | 0.08 | 5 | Endothelial |
| <i>PEA15</i>    | 0.83 | 0.00 | 0.00 | 0.38 | 0.14 | 5 | Endothelial |
| <i>ANXA3</i>    | 0.72 | 0.00 | 0.00 | 0.49 | 0.21 | 5 | Endothelial |
| <i>SLFN5</i>    | 0.77 | 0.00 | 0.00 | 0.30 | 0.09 | 5 | Endothelial |
| <i>CRIP2</i>    | 0.66 | 0.00 | 0.00 | 0.71 | 0.42 | 5 | Endothelial |
| <i>MGLL</i>     | 0.87 | 0.00 | 0.00 | 0.41 | 0.16 | 5 | Endothelial |
| <i>TPST2</i>    | 0.79 | 0.00 | 0.00 | 0.32 | 0.11 | 5 | Endothelial |
| <i>HES1</i>     | 0.88 | 0.00 | 0.00 | 0.56 | 0.28 | 5 | Endothelial |

|         |      |      |      |      |      |   |             |
|---------|------|------|------|------|------|---|-------------|
| NAV1    | 0.86 | 0.00 | 0.00 | 0.30 | 0.10 | 5 | Endothelial |
| RHOJ    | 0.78 | 0.00 | 0.00 | 0.41 | 0.16 | 5 | Endothelial |
| SEPT4   | 0.91 | 0.00 | 0.00 | 0.47 | 0.21 | 5 | Endothelial |
| SNRK    | 0.81 | 0.00 | 0.00 | 0.38 | 0.15 | 5 | Endothelial |
| CNN3    | 0.65 | 0.00 | 0.00 | 0.61 | 0.31 | 5 | Endothelial |
| VAT1    | 0.75 | 0.00 | 0.00 | 0.28 | 0.09 | 5 | Endothelial |
| ETS1    | 0.64 | 0.00 | 0.00 | 0.50 | 0.22 | 5 | Endothelial |
| PLEKHA1 | 0.80 | 0.00 | 0.00 | 0.31 | 0.11 | 5 | Endothelial |
| VIM     | 0.49 | 0.00 | 0.00 | 0.90 | 0.68 | 5 | Endothelial |
| LDB2    | 0.63 | 0.00 | 0.00 | 0.41 | 0.16 | 5 | Endothelial |
| SCARB1  | 0.78 | 0.00 | 0.00 | 0.27 | 0.08 | 5 | Endothelial |
| GALNT18 | 0.73 | 0.00 | 0.00 | 0.30 | 0.10 | 5 | Endothelial |
| ADD3    | 0.74 | 0.00 | 0.00 | 0.52 | 0.26 | 5 | Endothelial |
| B2M     | 1.07 | 0.00 | 0.00 | 0.88 | 0.69 | 5 | Endothelial |
| KLF2    | 0.73 | 0.00 | 0.00 | 0.43 | 0.18 | 5 | Endothelial |
| RHOC    | 0.71 | 0.00 | 0.00 | 0.47 | 0.23 | 5 | Endothelial |
| RAB11A  | 0.72 | 0.00 | 0.00 | 0.50 | 0.26 | 5 | Endothelial |
| NES     | 0.63 | 0.00 | 0.00 | 0.45 | 0.20 | 5 | Endothelial |
| SMARCA2 | 0.73 | 0.00 | 0.00 | 0.56 | 0.32 | 5 | Endothelial |
| TBX2    | 0.73 | 0.00 | 0.00 | 0.32 | 0.13 | 5 | Endothelial |
| SEMA3C  | 0.67 | 0.00 | 0.00 | 0.41 | 0.18 | 5 | Endothelial |
| BCAM    | 0.79 | 0.00 | 0.00 | 0.28 | 0.10 | 5 | Endothelial |
| CD151   | 0.69 | 0.00 | 0.00 | 0.40 | 0.18 | 5 | Endothelial |
| ENG     | 0.66 | 0.00 | 0.00 | 0.31 | 0.12 | 5 | Endothelial |
| SOX17   | 0.52 | 0.00 | 0.00 | 0.33 | 0.13 | 5 | Endothelial |
| KLHL5   | 0.66 | 0.00 | 0.00 | 0.33 | 0.13 | 5 | Endothelial |
| TCF4    | 0.59 | 0.00 | 0.00 | 0.65 | 0.40 | 5 | Endothelial |
| FERMT2  | 0.61 | 0.00 | 0.00 | 0.61 | 0.38 | 5 | Endothelial |
| ECE1    | 0.62 | 0.00 | 0.00 | 0.47 | 0.24 | 5 | Endothelial |
| RASGRP3 | 0.64 | 0.00 | 0.00 | 0.30 | 0.11 | 5 | Endothelial |
| ACBD5   | 0.76 | 0.00 | 0.00 | 0.31 | 0.12 | 5 | Endothelial |
| DDAH2   | 0.61 | 0.00 | 0.00 | 0.51 | 0.27 | 5 | Endothelial |
| PTPRG   | 0.72 | 0.00 | 0.00 | 0.29 | 0.11 | 5 | Endothelial |
| TUBB2A  | 0.71 | 0.00 | 0.00 | 0.41 | 0.20 | 5 | Endothelial |
| PDE4B   | 0.68 | 0.00 | 0.00 | 0.32 | 0.13 | 5 | Endothelial |
| GRAP    | 0.63 | 0.00 | 0.00 | 0.30 | 0.11 | 5 | Endothelial |
| GPIHBP1 | 0.65 | 0.00 | 0.00 | 0.35 | 0.15 | 5 | Endothelial |
| RAP1A   | 0.65 | 0.00 | 0.00 | 0.51 | 0.29 | 5 | Endothelial |
| ZEB1    | 0.64 | 0.00 | 0.00 | 0.28 | 0.11 | 5 | Endothelial |
| SYN3    | 0.81 | 0.00 | 0.00 | 0.31 | 0.13 | 5 | Endothelial |
| TM4SF1  | 0.56 | 0.00 | 0.00 | 0.43 | 0.21 | 5 | Endothelial |
| GIMAP1  | 0.56 | 0.00 | 0.00 | 0.31 | 0.13 | 5 | Endothelial |
| LYN     | 0.63 | 0.00 | 0.00 | 0.28 | 0.11 | 5 | Endothelial |

|                 |      |      |      |      |      |   |             |
|-----------------|------|------|------|------|------|---|-------------|
| <i>SNX3</i>     | 0.58 | 0.00 | 0.00 | 0.56 | 0.34 | 5 | Endothelial |
| <i>RELL1</i>    | 0.72 | 0.00 | 0.00 | 0.36 | 0.17 | 5 | Endothelial |
| <i>CMTM3</i>    | 0.64 | 0.00 | 0.00 | 0.32 | 0.14 | 5 | Endothelial |
| <i>CTNND1</i>   | 0.64 | 0.00 | 0.00 | 0.34 | 0.16 | 5 | Endothelial |
| <i>QKI</i>      | 0.60 | 0.00 | 0.00 | 0.49 | 0.28 | 5 | Endothelial |
| <i>TUBA1A</i>   | 0.47 | 0.00 | 0.00 | 0.73 | 0.51 | 5 | Endothelial |
| <i>ETS2</i>     | 0.60 | 0.00 | 0.00 | 0.29 | 0.12 | 5 | Endothelial |
| <i>MGST3</i>    | 0.66 | 0.00 | 0.00 | 0.29 | 0.13 | 5 | Endothelial |
| <i>CLIC4</i>    | 0.64 | 0.00 | 0.00 | 0.49 | 0.29 | 5 | Endothelial |
| <i>GNAI2</i>    | 0.53 | 0.00 | 0.00 | 0.59 | 0.37 | 5 | Endothelial |
| <i>GUK1</i>     | 0.72 | 0.00 | 0.00 | 0.37 | 0.18 | 5 | Endothelial |
| <i>SRGN</i>     | 0.34 | 0.00 | 0.00 | 0.56 | 0.31 | 5 | Endothelial |
| <i>MEF2A</i>    | 0.59 | 0.00 | 0.00 | 0.53 | 0.33 | 5 | Endothelial |
| <i>ACAP2</i>    | 0.64 | 0.00 | 0.00 | 0.35 | 0.18 | 5 | Endothelial |
| <i>CDKN1A</i>   | 1.00 | 0.00 | 0.00 | 0.28 | 0.13 | 5 | Endothelial |
| <i>GCC2</i>     | 0.62 | 0.00 | 0.00 | 0.42 | 0.23 | 5 | Endothelial |
| <i>SASH1</i>    | 0.58 | 0.00 | 0.00 | 0.28 | 0.12 | 5 | Endothelial |
| <i>MXRA7</i>    | 0.61 | 0.00 | 0.00 | 0.29 | 0.14 | 5 | Endothelial |
| <i>CD93</i>     | 0.42 | 0.00 | 0.00 | 0.42 | 0.21 | 5 | Endothelial |
| <i>IER2</i>     | 0.55 | 0.00 | 0.00 | 0.44 | 0.25 | 5 | Endothelial |
| <i>LAPTM4A</i>  | 0.46 | 0.00 | 0.00 | 0.70 | 0.54 | 5 | Endothelial |
| <i>ELK3</i>     | 0.53 | 0.00 | 0.00 | 0.29 | 0.13 | 5 | Endothelial |
| <i>SERPINH1</i> | 0.42 | 0.00 | 0.00 | 0.61 | 0.41 | 5 | Endothelial |
| <i>DYNLL1</i>   | 0.48 | 0.00 | 0.00 | 0.63 | 0.46 | 5 | Endothelial |
| <i>VAMP5</i>    | 0.76 | 0.00 | 0.00 | 0.26 | 0.12 | 5 | Endothelial |
| <i>DLC1</i>     | 0.55 | 0.00 | 0.00 | 0.34 | 0.17 | 5 | Endothelial |
| <i>HIP1</i>     | 0.54 | 0.00 | 0.00 | 0.29 | 0.14 | 5 | Endothelial |
| <i>MAP7D1</i>   | 0.58 | 0.00 | 0.00 | 0.33 | 0.17 | 5 | Endothelial |
| <i>SERINC3</i>  | 0.56 | 0.00 | 0.00 | 0.47 | 0.29 | 5 | Endothelial |
| <i>CLTB</i>     | 0.57 | 0.00 | 0.00 | 0.26 | 0.12 | 5 | Endothelial |
| <i>ABI1</i>     | 0.57 | 0.00 | 0.00 | 0.36 | 0.20 | 5 | Endothelial |
| <i>MYO6</i>     | 0.49 | 0.00 | 0.00 | 0.27 | 0.13 | 5 | Endothelial |
| <i>ITGB1</i>    | 0.35 | 0.00 | 0.00 | 0.80 | 0.63 | 5 | Endothelial |
| <i>MCAM</i>     | 0.48 | 0.00 | 0.00 | 0.27 | 0.13 | 5 | Endothelial |
| <i>SLC43A3</i>  | 0.55 | 0.00 | 0.00 | 0.34 | 0.18 | 5 | Endothelial |
| <i>NID1</i>     | 0.55 | 0.00 | 0.00 | 0.39 | 0.22 | 5 | Endothelial |
| <i>NOTCH1</i>   | 0.48 | 0.00 | 0.00 | 0.25 | 0.12 | 5 | Endothelial |
| <i>SKIL</i>     | 0.56 | 0.00 | 0.00 | 0.27 | 0.14 | 5 | Endothelial |
| <i>WASF2</i>    | 0.49 | 0.00 | 0.00 | 0.47 | 0.30 | 5 | Endothelial |
| <i>DUSP6</i>    | 0.45 | 0.00 | 0.00 | 0.33 | 0.18 | 5 | Endothelial |
| <i>REEP3</i>    | 0.52 | 0.00 | 0.00 | 0.33 | 0.18 | 5 | Endothelial |
| <i>PLCG1</i>    | 0.54 | 0.00 | 0.00 | 0.29 | 0.15 | 5 | Endothelial |
| <i>CLIC1</i>    | 0.43 | 0.00 | 0.00 | 0.55 | 0.38 | 5 | Endothelial |

|                 |      |      |      |      |      |   |             |
|-----------------|------|------|------|------|------|---|-------------|
| <i>CYB5R3</i>   | 0.52 | 0.00 | 0.00 | 0.54 | 0.39 | 5 | Endothelial |
| <i>MYL12B</i>   | 0.35 | 0.00 | 0.00 | 0.73 | 0.62 | 5 | Endothelial |
| <i>SPTAN1</i>   | 0.46 | 0.00 | 0.00 | 0.30 | 0.16 | 5 | Endothelial |
| <i>EVA1B</i>    | 0.49 | 0.00 | 0.00 | 0.34 | 0.19 | 5 | Endothelial |
| <i>LUZP1</i>    | 0.47 | 0.00 | 0.00 | 0.34 | 0.19 | 5 | Endothelial |
| <i>HDAC7</i>    | 0.49 | 0.00 | 0.00 | 0.26 | 0.13 | 5 | Endothelial |
| <i>DNAJC8</i>   | 0.42 | 0.00 | 0.00 | 0.57 | 0.42 | 5 | Endothelial |
| <i>SH3BP5</i>   | 0.44 | 0.00 | 0.00 | 0.34 | 0.19 | 5 | Endothelial |
| <i>GMFG</i>     | 0.33 | 0.00 | 0.00 | 0.28 | 0.14 | 5 | Endothelial |
| <i>CTNNA1</i>   | 0.40 | 0.00 | 0.00 | 0.52 | 0.35 | 5 | Endothelial |
| <i>EFNB1</i>    | 0.43 | 0.00 | 0.00 | 0.27 | 0.14 | 5 | Endothelial |
| <i>EFNB2</i>    | 0.38 | 0.00 | 0.00 | 0.27 | 0.14 | 5 | Endothelial |
| <i>PON2</i>     | 0.44 | 0.00 | 0.00 | 0.27 | 0.14 | 5 | Endothelial |
| <i>PTTG1IP</i>  | 0.48 | 0.00 | 0.00 | 0.30 | 0.17 | 5 | Endothelial |
| <i>MSN</i>      | 0.31 | 0.00 | 0.00 | 0.60 | 0.43 | 5 | Endothelial |
| <i>MTUS1</i>    | 0.48 | 0.00 | 0.00 | 0.28 | 0.15 | 5 | Endothelial |
| <i>PLK2</i>     | 0.45 | 0.00 | 0.00 | 0.29 | 0.16 | 5 | Endothelial |
| <i>RHOA</i>     | 0.36 | 0.00 | 0.00 | 0.61 | 0.48 | 5 | Endothelial |
| <i>SYPL1</i>    | 0.42 | 0.00 | 0.00 | 0.40 | 0.26 | 5 | Endothelial |
| <i>LEPROTL1</i> | 0.42 | 0.00 | 0.00 | 0.27 | 0.15 | 5 | Endothelial |
| <i>PPP2R5A</i>  | 0.46 | 0.00 | 0.00 | 0.25 | 0.14 | 5 | Endothelial |
| <i>SERINC1</i>  | 0.47 | 0.00 | 0.00 | 0.42 | 0.28 | 5 | Endothelial |
| <i>DAAM1</i>    | 0.44 | 0.00 | 0.00 | 0.28 | 0.16 | 5 | Endothelial |
| <i>FBNP1L</i>   | 0.46 | 0.00 | 0.00 | 0.37 | 0.24 | 5 | Endothelial |
| <i>ITPRIPL2</i> | 0.46 | 0.00 | 0.00 | 0.28 | 0.16 | 5 | Endothelial |
| <i>BNIP2</i>    | 0.40 | 0.00 | 0.00 | 0.42 | 0.28 | 5 | Endothelial |
| <i>CD47</i>     | 0.44 | 0.00 | 0.00 | 0.53 | 0.41 | 5 | Endothelial |
| <i>TJP2</i>     | 0.37 | 0.00 | 0.00 | 0.27 | 0.15 | 5 | Endothelial |
| <i>MOCS2</i>    | 0.48 | 0.00 | 0.00 | 0.30 | 0.18 | 5 | Endothelial |
| <i>PPP1R2</i>   | 0.43 | 0.00 | 0.00 | 0.36 | 0.24 | 5 | Endothelial |
| <i>NFIC</i>     | 0.45 | 0.00 | 0.00 | 0.37 | 0.24 | 5 | Endothelial |
| <i>MSI2</i>     | 0.46 | 0.00 | 0.00 | 0.26 | 0.15 | 5 | Endothelial |
| <i>KLC1</i>     | 0.40 | 0.00 | 0.00 | 0.25 | 0.14 | 5 | Endothelial |
| <i>HPCAL1</i>   | 0.39 | 0.00 | 0.00 | 0.26 | 0.15 | 5 | Endothelial |
| <i>ZFH3</i>     | 0.49 | 0.00 | 0.00 | 0.28 | 0.17 | 5 | Endothelial |
| <i>VAMP3</i>    | 0.39 | 0.00 | 0.00 | 0.25 | 0.15 | 5 | Endothelial |
| <i>RBMS1</i>    | 0.40 | 0.00 | 0.00 | 0.50 | 0.38 | 5 | Endothelial |
| <i>RALA</i>     | 0.41 | 0.00 | 0.00 | 0.36 | 0.24 | 5 | Endothelial |
| <i>DUSP1</i>    | 0.34 | 0.00 | 0.00 | 0.28 | 0.17 | 5 | Endothelial |
| <i>NFKBIA</i>   | 0.35 | 0.00 | 0.00 | 0.49 | 0.36 | 5 | Endothelial |
| <i>DPYSL2</i>   | 0.39 | 0.00 | 0.00 | 0.29 | 0.18 | 5 | Endothelial |
| <i>ZMIZ1</i>    | 0.38 | 0.00 | 0.00 | 0.31 | 0.20 | 5 | Endothelial |
| <i>S100A13</i>  | 0.42 | 0.00 | 0.00 | 0.38 | 0.27 | 5 | Endothelial |

|                  |      |      |      |      |      |   |             |
|------------------|------|------|------|------|------|---|-------------|
| <i>RPN1</i>      | 0.36 | 0.00 | 0.00 | 0.32 | 0.20 | 5 | Endothelial |
| <i>ARF1</i>      | 0.31 | 0.00 | 0.00 | 0.55 | 0.44 | 5 | Endothelial |
| <i>VPS36</i>     | 0.40 | 0.00 | 0.00 | 0.38 | 0.26 | 5 | Endothelial |
| <i>MXD4</i>      | 0.41 | 0.00 | 0.00 | 0.46 | 0.35 | 5 | Endothelial |
| <i>RAP1B</i>     | 0.33 | 0.00 | 0.00 | 0.35 | 0.24 | 5 | Endothelial |
| <i>SDCBP</i>     | 0.32 | 0.00 | 0.00 | 0.41 | 0.28 | 5 | Endothelial |
| <i>CCND3</i>     | 0.38 | 0.00 | 0.00 | 0.28 | 0.18 | 5 | Endothelial |
| <i>ARPC3</i>     | 0.32 | 0.00 | 0.00 | 0.40 | 0.28 | 5 | Endothelial |
| <i>FCHO2</i>     | 0.41 | 0.00 | 0.00 | 0.27 | 0.17 | 5 | Endothelial |
| <i>ITSN2</i>     | 0.37 | 0.00 | 0.00 | 0.34 | 0.23 | 5 | Endothelial |
| <i>APLP2</i>     | 0.31 | 0.00 | 0.00 | 0.51 | 0.40 | 5 | Endothelial |
| <i>RTN4</i>      | 0.42 | 0.00 | 0.00 | 0.36 | 0.26 | 5 | Endothelial |
| <i>ZCRB1</i>     | 0.35 | 0.00 | 0.00 | 0.38 | 0.27 | 5 | Endothelial |
| <i>TMOD3</i>     | 0.36 | 0.00 | 0.00 | 0.36 | 0.26 | 5 | Endothelial |
| <i>LEPROT</i>    | 0.33 | 0.00 | 0.00 | 0.44 | 0.33 | 5 | Endothelial |
| <i>TXNIP</i>     | 0.32 | 0.00 | 0.00 | 0.37 | 0.26 | 5 | Endothelial |
| <i>CHMP5</i>     | 0.36 | 0.00 | 0.00 | 0.35 | 0.25 | 5 | Endothelial |
| <i>GNB2</i>      | 0.34 | 0.00 | 0.00 | 0.47 | 0.37 | 5 | Endothelial |
| <i>LAMP1</i>     | 0.27 | 0.00 | 0.00 | 0.53 | 0.43 | 5 | Endothelial |
| <i>C5orf24</i>   | 0.33 | 0.00 | 0.00 | 0.36 | 0.26 | 5 | Endothelial |
| <i>TMEM50A</i>   | 0.27 | 0.00 | 0.00 | 0.54 | 0.44 | 5 | Endothelial |
| <i>PPP1CA</i>    | 0.29 | 0.00 | 0.00 | 0.44 | 0.33 | 5 | Endothelial |
| <i>TMEM176A</i>  | 0.32 | 0.00 | 0.00 | 0.28 | 0.19 | 5 | Endothelial |
| <i>SBDS</i>      | 0.30 | 0.00 | 0.00 | 0.33 | 0.24 | 5 | Endothelial |
| <i>SRPRA</i>     | 0.37 | 0.00 | 0.00 | 0.31 | 0.23 | 5 | Endothelial |
| <i>GABARAPL2</i> | 0.29 | 0.00 | 0.00 | 0.33 | 0.25 | 5 | Endothelial |
| <i>HOOK3</i>     | 0.33 | 0.00 | 0.00 | 0.30 | 0.22 | 5 | Endothelial |
| <i>ROCK2</i>     | 0.32 | 0.00 | 0.00 | 0.38 | 0.29 | 5 | Endothelial |
| <i>RAB6A</i>     | 0.27 | 0.00 | 0.00 | 0.29 | 0.21 | 5 | Endothelial |
| <i>MARCKSL1</i>  | 0.30 | 0.00 | 0.00 | 0.31 | 0.23 | 5 | Endothelial |
| <i>RAB7A</i>     | 0.26 | 0.00 | 0.00 | 0.35 | 0.27 | 5 | Endothelial |
| <i>RAB2A</i>     | 0.26 | 0.00 | 0.00 | 0.36 | 0.28 | 5 | Endothelial |
| <i>IRF2</i>      | 0.26 | 0.00 | 0.00 | 0.30 | 0.22 | 5 | Endothelial |
| <i>TMCO1</i>     | 0.25 | 0.00 | 0.00 | 0.37 | 0.29 | 5 | Endothelial |
| <i>RAB10</i>     | 0.26 | 0.00 | 0.00 | 0.31 | 0.24 | 5 | Endothelial |
| <i>GNB1</i>      | 0.26 | 0.00 | 0.00 | 0.28 | 0.22 | 5 | Endothelial |
| <i>XIAP</i>      | 0.26 | 0.00 | 0.00 | 0.26 | 0.19 | 5 | Endothelial |
| <i>KIF1B</i>     | 0.29 | 0.00 | 0.00 | 0.27 | 0.21 | 5 | Endothelial |
| <i>PDCD10</i>    | 0.26 | 0.00 | 0.00 | 0.26 | 0.20 | 5 | Endothelial |
| <i>IGFBP4</i>    | 0.26 | 0.00 | 0.00 | 0.34 | 0.27 | 5 | Endothelial |
| <i>AKAP5</i>     | 3.64 | 0.00 | 0.00 | 0.94 | 0.04 | 6 | AT1 Cell    |
| <i>AGER</i>      | 3.45 | 0.00 | 0.00 | 0.99 | 0.13 | 6 | AT1 Cell    |
| <i>CLDN18</i>    | 2.99 | 0.00 | 0.00 | 0.98 | 0.13 | 6 | AT1 Cell    |

|                  |      |      |      |      |      |   |          |
|------------------|------|------|------|------|------|---|----------|
| <i>RTKN2</i>     | 2.88 | 0.00 | 0.00 | 0.77 | 0.02 | 6 | AT1 Cell |
| <i>SEC14L3</i>   | 2.71 | 0.00 | 0.00 | 0.86 | 0.05 | 6 | AT1 Cell |
| <i>LMO7</i>      | 2.65 | 0.00 | 0.00 | 0.89 | 0.08 | 6 | AT1 Cell |
| <i>KRT7</i>      | 2.53 | 0.00 | 0.00 | 0.79 | 0.03 | 6 | AT1 Cell |
| <i>AQP5</i>      | 2.52 | 0.00 | 0.00 | 0.72 | 0.03 | 6 | AT1 Cell |
| <i>COL4A3</i>    | 2.42 | 0.00 | 0.00 | 0.66 | 0.01 | 6 | AT1 Cell |
| <i>SPOCK2</i>    | 2.41 | 0.00 | 0.00 | 0.67 | 0.02 | 6 | AT1 Cell |
| <i>GPRC5A</i>    | 2.36 | 0.00 | 0.00 | 0.74 | 0.03 | 6 | AT1 Cell |
| <i>VEGFA</i>     | 2.33 | 0.00 | 0.00 | 0.84 | 0.12 | 6 | AT1 Cell |
| <i>CLIC3</i>     | 2.28 | 0.00 | 0.00 | 0.74 | 0.05 | 6 | AT1 Cell |
| <i>MSLN</i>      | 2.26 | 0.00 | 0.00 | 0.61 | 0.01 | 6 | AT1 Cell |
| <i>MYH14</i>     | 2.23 | 0.00 | 0.00 | 0.74 | 0.05 | 6 | AT1 Cell |
| <i>CLIC5</i>     | 2.21 | 0.00 | 0.00 | 0.92 | 0.19 | 6 | AT1 Cell |
| <i>COL4A4</i>    | 2.19 | 0.00 | 0.00 | 0.58 | 0.01 | 6 | AT1 Cell |
| <i>HOPX</i>      | 2.19 | 0.00 | 0.00 | 0.74 | 0.07 | 6 | AT1 Cell |
| <i>C19orf33</i>  | 2.17 | 0.00 | 0.00 | 0.67 | 0.04 | 6 | AT1 Cell |
| <i>KRT19</i>     | 2.11 | 0.00 | 0.00 | 0.60 | 0.02 | 6 | AT1 Cell |
| <i>SCNN1G</i>    | 2.08 | 0.00 | 0.00 | 0.57 | 0.01 | 6 | AT1 Cell |
| <i>S100A14</i>   | 2.06 | 0.00 | 0.00 | 0.52 | 0.01 | 6 | AT1 Cell |
| <i>SCNN1A</i>    | 2.04 | 0.00 | 0.00 | 0.63 | 0.03 | 6 | AT1 Cell |
| <i>PDGFA</i>     | 2.03 | 0.00 | 0.00 | 0.64 | 0.07 | 6 | AT1 Cell |
| <i>SEMA3E</i>    | 2.01 | 0.00 | 0.00 | 0.49 | 0.01 | 6 | AT1 Cell |
| <i>TINAGL1</i>   | 2.01 | 0.00 | 0.00 | 0.67 | 0.10 | 6 | AT1 Cell |
| <i>PDPN</i>      | 1.98 | 0.00 | 0.00 | 0.55 | 0.03 | 6 | AT1 Cell |
| <i>CDKN2B</i>    | 1.96 | 0.00 | 0.00 | 0.56 | 0.02 | 6 | AT1 Cell |
| <i>NDNF</i>      | 1.91 | 0.00 | 0.00 | 0.49 | 0.03 | 6 | AT1 Cell |
| <i>KRT8</i>      | 1.88 | 0.00 | 0.00 | 0.57 | 0.04 | 6 | AT1 Cell |
| <i>S100A6</i>    | 1.86 | 0.00 | 0.00 | 0.93 | 0.32 | 6 | AT1 Cell |
| <i>TIMP3</i>     | 1.86 | 0.00 | 0.00 | 0.91 | 0.35 | 6 | AT1 Cell |
| <i>SLC39A8</i>   | 1.84 | 0.00 | 0.00 | 0.57 | 0.05 | 6 | AT1 Cell |
| <i>SEMA3A</i>    | 1.84 | 0.00 | 0.00 | 0.45 | 0.01 | 6 | AT1 Cell |
| <i>TSPAN8</i>    | 1.81 | 0.00 | 0.00 | 0.68 | 0.09 | 6 | AT1 Cell |
| <i>PRDX6</i>     | 1.81 | 0.00 | 0.00 | 0.83 | 0.26 | 6 | AT1 Cell |
| <i>GIPC2</i>     | 1.77 | 0.00 | 0.00 | 0.43 | 0.01 | 6 | AT1 Cell |
| <i>ICAM1</i>     | 1.73 | 0.00 | 0.00 | 0.63 | 0.07 | 6 | AT1 Cell |
| <i>ANO1</i>      | 1.73 | 0.00 | 0.00 | 0.48 | 0.03 | 6 | AT1 Cell |
| <i>TMEM37</i>    | 1.69 | 0.00 | 0.00 | 0.45 | 0.03 | 6 | AT1 Cell |
| <i>ATP1B1</i>    | 1.67 | 0.00 | 0.00 | 0.70 | 0.16 | 6 | AT1 Cell |
| <i>ITGB6</i>     | 1.66 | 0.00 | 0.00 | 0.35 | 0.01 | 6 | AT1 Cell |
| <i>ANXA1</i>     | 1.65 | 0.00 | 0.00 | 0.71 | 0.17 | 6 | AT1 Cell |
| <i>FAM174B</i>   | 1.64 | 0.00 | 0.00 | 0.43 | 0.03 | 6 | AT1 Cell |
| <i>F3</i>        | 1.64 | 0.00 | 0.00 | 0.41 | 0.02 | 6 | AT1 Cell |
| <i>RAB11FIP1</i> | 1.63 | 0.00 | 0.00 | 0.48 | 0.03 | 6 | AT1 Cell |

|                 |      |      |      |      |      |   |          |
|-----------------|------|------|------|------|------|---|----------|
| <i>FLRT3</i>    | 1.63 | 0.00 | 0.00 | 0.39 | 0.02 | 6 | AT1 Cell |
| <i>NDST1</i>    | 1.62 | 0.00 | 0.00 | 0.52 | 0.09 | 6 | AT1 Cell |
| <i>KRT18</i>    | 1.62 | 0.00 | 0.00 | 0.53 | 0.05 | 6 | AT1 Cell |
| <i>RGCC</i>     | 1.60 | 0.00 | 0.00 | 0.65 | 0.17 | 6 | AT1 Cell |
| <i>ALCAM</i>    | 1.60 | 0.00 | 0.00 | 0.84 | 0.18 | 6 | AT1 Cell |
| <i>MTHFD1</i>   | 1.60 | 0.00 | 0.00 | 0.51 | 0.06 | 6 | AT1 Cell |
| <i>MAL2</i>     | 1.59 | 0.00 | 0.00 | 0.48 | 0.03 | 6 | AT1 Cell |
| <i>CLDN3</i>    | 1.58 | 0.00 | 0.00 | 0.58 | 0.08 | 6 | AT1 Cell |
| <i>PTPRF</i>    | 1.57 | 0.00 | 0.00 | 0.70 | 0.12 | 6 | AT1 Cell |
| <i>ANXA3</i>    | 1.56 | 0.00 | 0.00 | 0.76 | 0.19 | 6 | AT1 Cell |
| <i>SYN3</i>     | 1.56 | 0.00 | 0.00 | 0.59 | 0.12 | 6 | AT1 Cell |
| <i>CYSTM1</i>   | 1.55 | 0.00 | 0.00 | 0.53 | 0.07 | 6 | AT1 Cell |
| <i>AGRN</i>     | 1.54 | 0.00 | 0.00 | 0.60 | 0.10 | 6 | AT1 Cell |
| <i>CRYAB</i>    | 1.52 | 0.00 | 0.00 | 0.65 | 0.13 | 6 | AT1 Cell |
| <i>AHNAK</i>    | 1.52 | 0.00 | 0.00 | 0.90 | 0.41 | 6 | AT1 Cell |
| <i>SCD</i>      | 1.47 | 0.00 | 0.00 | 0.68 | 0.18 | 6 | AT1 Cell |
| <i>LAMC2</i>    | 1.46 | 0.00 | 0.00 | 0.40 | 0.02 | 6 | AT1 Cell |
| <i>CADM1</i>    | 1.46 | 0.00 | 0.00 | 0.58 | 0.12 | 6 | AT1 Cell |
| <i>NKX2-1</i>   | 1.45 | 0.00 | 0.00 | 0.55 | 0.07 | 6 | AT1 Cell |
| <i>EZR</i>      | 1.45 | 0.00 | 0.00 | 0.70 | 0.18 | 6 | AT1 Cell |
| <i>SELENBP1</i> | 1.44 | 0.00 | 0.00 | 0.55 | 0.19 | 6 | AT1 Cell |
| <i>DAG1</i>     | 1.43 | 0.00 | 0.00 | 0.45 | 0.07 | 6 | AT1 Cell |
| <i>CTSH</i>     | 1.43 | 0.00 | 0.00 | 0.73 | 0.18 | 6 | AT1 Cell |
| <i>IL18R1</i>   | 1.41 | 0.00 | 0.00 | 0.44 | 0.04 | 6 | AT1 Cell |
| <i>EPCAM</i>    | 1.40 | 0.00 | 0.00 | 0.52 | 0.07 | 6 | AT1 Cell |
| <i>TSPAN15</i>  | 1.38 | 0.00 | 0.00 | 0.46 | 0.06 | 6 | AT1 Cell |
| <i>CLDN7</i>    | 1.37 | 0.00 | 0.00 | 0.44 | 0.05 | 6 | AT1 Cell |
| <i>WWC1</i>     | 1.36 | 0.00 | 0.00 | 0.42 | 0.03 | 6 | AT1 Cell |
| <i>TP53BP2</i>  | 1.36 | 0.00 | 0.00 | 0.42 | 0.06 | 6 | AT1 Cell |
| <i>SCNN1B</i>   | 1.35 | 0.00 | 0.00 | 0.33 | 0.01 | 6 | AT1 Cell |
| <i>CXADR</i>    | 1.34 | 0.00 | 0.00 | 0.38 | 0.04 | 6 | AT1 Cell |
| <i>LLGL2</i>    | 1.34 | 0.00 | 0.00 | 0.36 | 0.02 | 6 | AT1 Cell |
| <i>WWP1</i>     | 1.33 | 0.00 | 0.00 | 0.53 | 0.10 | 6 | AT1 Cell |
| <i>EPS8L2</i>   | 1.32 | 0.00 | 0.00 | 0.34 | 0.01 | 6 | AT1 Cell |
| <i>CTGF</i>     | 1.29 | 0.00 | 0.00 | 0.44 | 0.08 | 6 | AT1 Cell |
| <i>TEAD1</i>    | 1.28 | 0.00 | 0.00 | 0.50 | 0.11 | 6 | AT1 Cell |
| <i>TACSTD2</i>  | 1.28 | 0.00 | 0.00 | 0.28 | 0.01 | 6 | AT1 Cell |
| <i>FAM189A2</i> | 1.28 | 0.00 | 0.00 | 0.35 | 0.02 | 6 | AT1 Cell |
| <i>MMP11</i>    | 1.28 | 0.00 | 0.00 | 0.34 | 0.03 | 6 | AT1 Cell |
| <i>PARD6B</i>   | 1.27 | 0.00 | 0.00 | 0.31 | 0.01 | 6 | AT1 Cell |
| <i>SPINT2</i>   | 1.26 | 0.00 | 0.00 | 0.51 | 0.09 | 6 | AT1 Cell |
| <i>CD9</i>      | 1.26 | 0.00 | 0.00 | 0.85 | 0.33 | 6 | AT1 Cell |
| <i>OSBPL6</i>   | 1.25 | 0.00 | 0.00 | 0.31 | 0.03 | 6 | AT1 Cell |

|                  |      |      |      |      |      |   |          |
|------------------|------|------|------|------|------|---|----------|
| <i>MPP5</i>      | 1.25 | 0.00 | 0.00 | 0.46 | 0.09 | 6 | AT1 Cell |
| <i>PPP3CA</i>    | 1.24 | 0.00 | 0.00 | 0.70 | 0.24 | 6 | AT1 Cell |
| <i>PKP2</i>      | 1.24 | 0.00 | 0.00 | 0.32 | 0.02 | 6 | AT1 Cell |
| <i>NAV2</i>      | 1.24 | 0.00 | 0.00 | 0.39 | 0.06 | 6 | AT1 Cell |
| <i>DENND3</i>    | 1.23 | 0.00 | 0.00 | 0.40 | 0.05 | 6 | AT1 Cell |
| <i>SH3D21</i>    | 1.20 | 0.00 | 0.00 | 0.28 | 0.02 | 6 | AT1 Cell |
| <i>PDE7A</i>     | 1.17 | 0.00 | 0.00 | 0.37 | 0.05 | 6 | AT1 Cell |
| <i>WDR45</i>     | 1.17 | 0.00 | 0.00 | 0.41 | 0.07 | 6 | AT1 Cell |
| <i>GJA1</i>      | 1.15 | 0.00 | 0.00 | 0.45 | 0.07 | 6 | AT1 Cell |
| <i>MAGI3</i>     | 1.15 | 0.00 | 0.00 | 0.41 | 0.09 | 6 | AT1 Cell |
| <i>HS2ST1</i>    | 1.15 | 0.00 | 0.00 | 0.31 | 0.04 | 6 | AT1 Cell |
| <i>SLC1A5</i>    | 1.15 | 0.00 | 0.00 | 0.43 | 0.09 | 6 | AT1 Cell |
| <i>SLCO3A1</i>   | 1.12 | 0.00 | 0.00 | 0.36 | 0.06 | 6 | AT1 Cell |
| <i>ARHGEF26</i>  | 1.12 | 0.00 | 0.00 | 0.34 | 0.05 | 6 | AT1 Cell |
| <i>IGFBP6</i>    | 1.12 | 0.00 | 0.00 | 0.27 | 0.03 | 6 | AT1 Cell |
| <i>ERRFI1</i>    | 1.11 | 0.00 | 0.00 | 0.40 | 0.07 | 6 | AT1 Cell |
| <i>PRKCI</i>     | 1.11 | 0.00 | 0.00 | 0.46 | 0.10 | 6 | AT1 Cell |
| <i>IER3</i>      | 1.11 | 0.00 | 0.00 | 0.46 | 0.12 | 6 | AT1 Cell |
| <i>CTTNBP2NL</i> | 1.11 | 0.00 | 0.00 | 0.39 | 0.09 | 6 | AT1 Cell |
| <i>GDE1</i>      | 1.10 | 0.00 | 0.00 | 0.50 | 0.12 | 6 | AT1 Cell |
| <i>SPHK1</i>     | 1.10 | 0.00 | 0.00 | 0.26 | 0.02 | 6 | AT1 Cell |
| <i>BCAM</i>      | 1.08 | 0.00 | 0.00 | 0.41 | 0.10 | 6 | AT1 Cell |
| <i>FBLN5</i>     | 1.07 | 0.00 | 0.00 | 0.58 | 0.16 | 6 | AT1 Cell |
| <i>CHCHD10</i>   | 1.07 | 0.00 | 0.00 | 0.48 | 0.11 | 6 | AT1 Cell |
| <i>TSPAN2</i>    | 1.06 | 0.00 | 0.00 | 0.43 | 0.10 | 6 | AT1 Cell |
| <i>CDH1</i>      | 1.06 | 0.00 | 0.00 | 0.36 | 0.05 | 6 | AT1 Cell |
| <i>VAMP8</i>     | 1.06 | 0.00 | 0.00 | 0.74 | 0.31 | 6 | AT1 Cell |
| <i>CHKA</i>      | 1.06 | 0.00 | 0.00 | 0.41 | 0.07 | 6 | AT1 Cell |
| <i>COL4A5</i>    | 1.05 | 0.00 | 0.00 | 0.25 | 0.03 | 6 | AT1 Cell |
| <i>KLF6</i>      | 1.05 | 0.00 | 0.00 | 0.72 | 0.33 | 6 | AT1 Cell |
| <i>FGF1</i>      | 1.04 | 0.00 | 0.00 | 0.29 | 0.04 | 6 | AT1 Cell |
| <i>TMEM63B</i>   | 1.04 | 0.00 | 0.00 | 0.33 | 0.05 | 6 | AT1 Cell |
| <i>LAMB3</i>     | 1.02 | 0.00 | 0.00 | 0.26 | 0.02 | 6 | AT1 Cell |
| <i>GATA6</i>     | 1.02 | 0.00 | 0.00 | 0.36 | 0.07 | 6 | AT1 Cell |
| <i>MAL</i>       | 1.01 | 0.00 | 0.00 | 0.29 | 0.03 | 6 | AT1 Cell |
| <i>FADS3</i>     | 1.00 | 0.00 | 0.00 | 0.26 | 0.03 | 6 | AT1 Cell |
| <i>CRB3</i>      | 1.00 | 0.00 | 0.00 | 0.28 | 0.02 | 6 | AT1 Cell |
| <i>C1orf116</i>  | 0.99 | 0.00 | 0.00 | 0.26 | 0.02 | 6 | AT1 Cell |
| <i>NRBP2</i>     | 0.99 | 0.00 | 0.00 | 0.29 | 0.04 | 6 | AT1 Cell |
| <i>NPNT</i>      | 0.97 | 0.00 | 0.00 | 0.75 | 0.21 | 6 | AT1 Cell |
| <i>NCEH1</i>     | 0.93 | 0.00 | 0.00 | 0.29 | 0.05 | 6 | AT1 Cell |
| <i>IRX3</i>      | 0.91 | 0.00 | 0.00 | 0.31 | 0.06 | 6 | AT1 Cell |
| <i>SFTA2</i>     | 0.90 | 0.00 | 0.00 | 0.50 | 0.13 | 6 | AT1 Cell |

|                 |      |      |      |      |      |   |          |
|-----------------|------|------|------|------|------|---|----------|
| <i>APP</i>      | 0.85 | 0.00 | 0.00 | 0.92 | 0.59 | 6 | AT1 Cell |
| <i>MYO5C</i>    | 0.81 | 0.00 | 0.00 | 0.30 | 0.06 | 6 | AT1 Cell |
| <i>LIMCH1</i>   | 0.75 | 0.00 | 0.00 | 0.82 | 0.26 | 6 | AT1 Cell |
| <i>ANXA2</i>    | 0.97 | 0.00 | 0.00 | 0.84 | 0.48 | 6 | AT1 Cell |
| <i>IGFBP7</i>   | 0.93 | 0.00 | 0.00 | 0.83 | 0.41 | 6 | AT1 Cell |
| <i>SAMHD1</i>   | 0.88 | 0.00 | 0.00 | 0.54 | 0.17 | 6 | AT1 Cell |
| <i>QKI</i>      | 0.95 | 0.00 | 0.00 | 0.65 | 0.27 | 6 | AT1 Cell |
| <i>CYR61</i>    | 0.99 | 0.00 | 0.00 | 0.40 | 0.11 | 6 | AT1 Cell |
| <i>ATP8A1</i>   | 0.89 | 0.00 | 0.00 | 0.45 | 0.13 | 6 | AT1 Cell |
| <i>LGALS3</i>   | 0.68 | 0.00 | 0.00 | 0.49 | 0.15 | 6 | AT1 Cell |
| <i>S100A11</i>  | 0.89 | 0.00 | 0.00 | 0.82 | 0.48 | 6 | AT1 Cell |
| <i>CUX1</i>     | 0.97 | 0.00 | 0.00 | 0.46 | 0.15 | 6 | AT1 Cell |
| <i>TACC2</i>    | 0.85 | 0.00 | 0.00 | 0.29 | 0.06 | 6 | AT1 Cell |
| <i>FAM177A1</i> | 0.90 | 0.00 | 0.00 | 0.50 | 0.17 | 6 | AT1 Cell |
| <i>BSG</i>      | 0.94 | 0.00 | 0.00 | 0.73 | 0.37 | 6 | AT1 Cell |
| <i>PMP22</i>    | 0.89 | 0.00 | 0.00 | 0.70 | 0.32 | 6 | AT1 Cell |
| <i>SPARC</i>    | 0.71 | 0.00 | 0.00 | 0.98 | 0.75 | 6 | AT1 Cell |
| <i>MSN</i>      | 0.84 | 0.00 | 0.00 | 0.80 | 0.43 | 6 | AT1 Cell |
| <i>TEF</i>      | 0.77 | 0.00 | 0.00 | 0.27 | 0.06 | 6 | AT1 Cell |
| <i>WNK1</i>     | 0.92 | 0.00 | 0.00 | 0.46 | 0.15 | 6 | AT1 Cell |
| <i>HDGF</i>     | 0.91 | 0.00 | 0.00 | 0.54 | 0.21 | 6 | AT1 Cell |
| <i>CTDSPL</i>   | 0.88 | 0.00 | 0.00 | 0.34 | 0.09 | 6 | AT1 Cell |
| <i>TFDP2</i>    | 0.88 | 0.00 | 0.00 | 0.31 | 0.08 | 6 | AT1 Cell |
| <i>SWT1</i>     | 0.89 | 0.00 | 0.00 | 0.40 | 0.12 | 6 | AT1 Cell |
| <i>CRIP2</i>    | 0.77 | 0.00 | 0.00 | 0.78 | 0.42 | 6 | AT1 Cell |
| <i>HSPG2</i>    | 0.83 | 0.00 | 0.00 | 0.27 | 0.06 | 6 | AT1 Cell |
| <i>WWC2</i>     | 0.89 | 0.00 | 0.00 | 0.38 | 0.11 | 6 | AT1 Cell |
| <i>LPIN2</i>    | 0.93 | 0.00 | 0.00 | 0.40 | 0.12 | 6 | AT1 Cell |
| <i>C16orf70</i> | 0.76 | 0.00 | 0.00 | 0.26 | 0.06 | 6 | AT1 Cell |
| <i>CHPT1</i>    | 0.85 | 0.00 | 0.00 | 0.35 | 0.10 | 6 | AT1 Cell |
| <i>MBIP</i>     | 0.80 | 0.00 | 0.00 | 0.36 | 0.10 | 6 | AT1 Cell |
| <i>FDX1</i>     | 0.91 | 0.00 | 0.00 | 0.40 | 0.13 | 6 | AT1 Cell |
| <i>DSTN</i>     | 0.67 | 0.00 | 0.00 | 0.82 | 0.52 | 6 | AT1 Cell |
| <i>PGRMC1</i>   | 0.92 | 0.00 | 0.00 | 0.48 | 0.18 | 6 | AT1 Cell |
| <i>PTGS1</i>    | 0.83 | 0.00 | 0.00 | 0.32 | 0.08 | 6 | AT1 Cell |
| <i>TNS1</i>     | 0.82 | 0.00 | 0.00 | 0.53 | 0.21 | 6 | AT1 Cell |
| <i>DDX47</i>    | 0.85 | 0.00 | 0.00 | 0.39 | 0.12 | 6 | AT1 Cell |
| <i>AMOTL2</i>   | 0.74 | 0.00 | 0.00 | 0.31 | 0.08 | 6 | AT1 Cell |
| <i>WFDC2</i>    | 0.53 | 0.00 | 0.00 | 0.44 | 0.14 | 6 | AT1 Cell |
| <i>WLS</i>      | 0.86 | 0.00 | 0.00 | 0.51 | 0.20 | 6 | AT1 Cell |
| <i>ARL4C</i>    | 0.75 | 0.00 | 0.00 | 0.30 | 0.08 | 6 | AT1 Cell |
| <i>MYO1C</i>    | 0.79 | 0.00 | 0.00 | 0.32 | 0.09 | 6 | AT1 Cell |
| <i>ASAH1</i>    | 0.82 | 0.00 | 0.00 | 0.39 | 0.13 | 6 | AT1 Cell |

|                 |      |      |      |      |      |   |          |
|-----------------|------|------|------|------|------|---|----------|
| <i>CERS2</i>    | 0.84 | 0.00 | 0.00 | 0.40 | 0.14 | 6 | AT1 Cell |
| <i>LAMA5</i>    | 0.78 | 0.00 | 0.00 | 0.29 | 0.08 | 6 | AT1 Cell |
| <i>GPX4</i>     | 0.80 | 0.00 | 0.00 | 0.67 | 0.37 | 6 | AT1 Cell |
| <i>IQGAP1</i>   | 0.69 | 0.00 | 0.00 | 0.73 | 0.42 | 6 | AT1 Cell |
| <i>TJP2</i>     | 0.76 | 0.00 | 0.00 | 0.41 | 0.15 | 6 | AT1 Cell |
| <i>PHACTR1</i>  | 0.81 | 0.00 | 0.00 | 0.25 | 0.06 | 6 | AT1 Cell |
| <i>BTG3</i>     | 0.79 | 0.00 | 0.00 | 0.34 | 0.11 | 6 | AT1 Cell |
| <i>CNN2</i>     | 0.66 | 0.00 | 0.00 | 0.71 | 0.37 | 6 | AT1 Cell |
| <i>ANXA4</i>    | 0.76 | 0.00 | 0.00 | 0.30 | 0.09 | 6 | AT1 Cell |
| <i>KLF9</i>     | 0.75 | 0.00 | 0.00 | 0.42 | 0.16 | 6 | AT1 Cell |
| <i>UTRN</i>     | 0.77 | 0.00 | 0.00 | 0.41 | 0.15 | 6 | AT1 Cell |
| <i>TMSB4X</i>   | 0.29 | 0.00 | 0.00 | 0.99 | 0.90 | 6 | AT1 Cell |
| <i>EFNA1</i>    | 0.75 | 0.00 | 0.00 | 0.28 | 0.08 | 6 | AT1 Cell |
| <i>SDC4</i>     | 0.62 | 0.00 | 0.00 | 0.48 | 0.19 | 6 | AT1 Cell |
| <i>TMEM245</i>  | 0.69 | 0.00 | 0.00 | 0.30 | 0.09 | 6 | AT1 Cell |
| <i>RNASE4</i>   | 0.68 | 0.00 | 0.00 | 0.43 | 0.16 | 6 | AT1 Cell |
| <i>MRPL14</i>   | 0.76 | 0.00 | 0.00 | 0.38 | 0.14 | 6 | AT1 Cell |
| <i>ARRDC1</i>   | 0.62 | 0.00 | 0.00 | 0.29 | 0.09 | 6 | AT1 Cell |
| <i>GALNT18</i>  | 0.71 | 0.00 | 0.00 | 0.31 | 0.10 | 6 | AT1 Cell |
| <i>CREB3L2</i>  | 0.80 | 0.00 | 0.00 | 0.35 | 0.12 | 6 | AT1 Cell |
| <i>AQP1</i>     | 0.63 | 0.00 | 0.00 | 0.48 | 0.19 | 6 | AT1 Cell |
| <i>SFTPD</i>    | 0.71 | 0.00 | 0.00 | 0.40 | 0.15 | 6 | AT1 Cell |
| <i>NCKAP5</i>   | 0.68 | 0.00 | 0.00 | 0.34 | 0.12 | 6 | AT1 Cell |
| <i>CDKN1A</i>   | 0.47 | 0.00 | 0.00 | 0.36 | 0.12 | 6 | AT1 Cell |
| <i>DPYSL2</i>   | 0.80 | 0.00 | 0.00 | 0.42 | 0.18 | 6 | AT1 Cell |
| <i>RABAC1</i>   | 0.72 | 0.00 | 0.00 | 0.57 | 0.29 | 6 | AT1 Cell |
| <i>EPN2</i>     | 0.71 | 0.00 | 0.00 | 0.32 | 0.11 | 6 | AT1 Cell |
| <i>NAPSA</i>    | 0.76 | 0.00 | 0.00 | 0.45 | 0.19 | 6 | AT1 Cell |
| <i>SOD1</i>     | 0.69 | 0.00 | 0.00 | 0.71 | 0.47 | 6 | AT1 Cell |
| <i>GADD45B</i>  | 0.70 | 0.00 | 0.00 | 0.28 | 0.09 | 6 | AT1 Cell |
| <i>RAI14</i>    | 0.60 | 0.00 | 0.00 | 0.30 | 0.10 | 6 | AT1 Cell |
| <i>ARHGAP5</i>  | 0.74 | 0.00 | 0.00 | 0.40 | 0.16 | 6 | AT1 Cell |
| <i>CTNNA1</i>   | 0.64 | 0.00 | 0.00 | 0.64 | 0.35 | 6 | AT1 Cell |
| <i>LRPAP1</i>   | 0.86 | 0.00 | 0.00 | 0.39 | 0.16 | 6 | AT1 Cell |
| <i>HES1</i>     | 0.62 | 0.00 | 0.00 | 0.57 | 0.28 | 6 | AT1 Cell |
| <i>FBNP1L</i>   | 0.67 | 0.00 | 0.00 | 0.50 | 0.23 | 6 | AT1 Cell |
| <i>RABGAP1L</i> | 0.65 | 0.00 | 0.00 | 0.26 | 0.08 | 6 | AT1 Cell |
| <i>GSN</i>      | 0.29 | 0.00 | 0.00 | 0.53 | 0.24 | 6 | AT1 Cell |
| <i>PCNT</i>     | 0.61 | 0.00 | 0.00 | 0.31 | 0.11 | 6 | AT1 Cell |
| <i>NBEAL1</i>   | 0.64 | 0.00 | 0.00 | 0.33 | 0.12 | 6 | AT1 Cell |
| <i>CAPN2</i>    | 0.69 | 0.00 | 0.00 | 0.37 | 0.16 | 6 | AT1 Cell |
| <i>ARL6IP1</i>  | 0.58 | 0.00 | 0.00 | 0.73 | 0.49 | 6 | AT1 Cell |
| <i>GNAS</i>     | 0.47 | 0.00 | 0.00 | 0.84 | 0.65 | 6 | AT1 Cell |

|                 |      |      |      |      |      |   |          |
|-----------------|------|------|------|------|------|---|----------|
| <i>PPP1R9A</i>  | 0.55 | 0.00 | 0.00 | 0.33 | 0.13 | 6 | AT1 Cell |
| <i>RB1CC1</i>   | 0.63 | 0.00 | 0.00 | 0.51 | 0.26 | 6 | AT1 Cell |
| <i>TPPP3</i>    | 0.67 | 0.00 | 0.00 | 0.33 | 0.13 | 6 | AT1 Cell |
| <i>ELOVL5</i>   | 0.58 | 0.00 | 0.00 | 0.35 | 0.14 | 6 | AT1 Cell |
| <i>LPCAT1</i>   | 0.49 | 0.00 | 0.00 | 0.40 | 0.17 | 6 | AT1 Cell |
| <i>MECOM</i>    | 0.55 | 0.00 | 0.00 | 0.26 | 0.09 | 6 | AT1 Cell |
| <i>RALBP1</i>   | 0.57 | 0.00 | 0.00 | 0.55 | 0.30 | 6 | AT1 Cell |
| <i>MYO1B</i>    | 0.65 | 0.00 | 0.00 | 0.36 | 0.15 | 6 | AT1 Cell |
| <i>PGAP2</i>    | 0.65 | 0.00 | 0.00 | 0.25 | 0.09 | 6 | AT1 Cell |
| <i>PDLIM2</i>   | 0.61 | 0.00 | 0.00 | 0.39 | 0.18 | 6 | AT1 Cell |
| <i>ATP6V1A</i>  | 0.56 | 0.00 | 0.00 | 0.49 | 0.25 | 6 | AT1 Cell |
| <i>SPTLC2</i>   | 0.60 | 0.00 | 0.00 | 0.33 | 0.13 | 6 | AT1 Cell |
| <i>CHP1</i>     | 0.55 | 0.00 | 0.00 | 0.32 | 0.13 | 6 | AT1 Cell |
| <i>ZFYVE21</i>  | 0.63 | 0.00 | 0.00 | 0.26 | 0.09 | 6 | AT1 Cell |
| <i>KIAA0040</i> | 0.60 | 0.00 | 0.00 | 0.37 | 0.17 | 6 | AT1 Cell |
| <i>SLC38A2</i>  | 0.59 | 0.00 | 0.00 | 0.39 | 0.18 | 6 | AT1 Cell |
| <i>VAPA</i>     | 0.59 | 0.00 | 0.00 | 0.45 | 0.23 | 6 | AT1 Cell |
| <i>TPM3</i>     | 0.44 | 0.00 | 0.00 | 0.87 | 0.66 | 6 | AT1 Cell |
| <i>ARHGEF2</i>  | 0.59 | 0.00 | 0.00 | 0.40 | 0.19 | 6 | AT1 Cell |
| <i>RBMS1</i>    | 0.56 | 0.00 | 0.00 | 0.61 | 0.37 | 6 | AT1 Cell |
| <i>ECE1</i>     | 0.48 | 0.00 | 0.00 | 0.48 | 0.24 | 6 | AT1 Cell |
| <i>RNF181</i>   | 0.60 | 0.00 | 0.00 | 0.30 | 0.13 | 6 | AT1 Cell |
| <i>EHD2</i>     | 0.62 | 0.00 | 0.00 | 0.35 | 0.16 | 6 | AT1 Cell |
| <i>LAS1L</i>    | 0.83 | 0.00 | 0.00 | 0.29 | 0.12 | 6 | AT1 Cell |
| <i>NPC2</i>     | 0.58 | 0.00 | 0.00 | 0.72 | 0.54 | 6 | AT1 Cell |
| <i>BTG2</i>     | 0.49 | 0.00 | 0.00 | 0.43 | 0.21 | 6 | AT1 Cell |
| <i>ACTN4</i>    | 0.56 | 0.00 | 0.00 | 0.51 | 0.29 | 6 | AT1 Cell |
| <i>MPRIIP</i>   | 0.54 | 0.00 | 0.00 | 0.40 | 0.19 | 6 | AT1 Cell |
| <i>ZDHHC3</i>   | 0.48 | 0.00 | 0.00 | 0.33 | 0.15 | 6 | AT1 Cell |
| <i>DDB1</i>     | 0.55 | 0.00 | 0.00 | 0.36 | 0.17 | 6 | AT1 Cell |
| <i>TGFB2</i>    | 0.52 | 0.00 | 0.00 | 0.31 | 0.13 | 6 | AT1 Cell |
| <i>CRLF3</i>    | 0.46 | 0.00 | 0.00 | 0.29 | 0.12 | 6 | AT1 Cell |
| <i>KANK2</i>    | 0.53 | 0.00 | 0.00 | 0.30 | 0.13 | 6 | AT1 Cell |
| <i>CALM2</i>    | 0.45 | 0.00 | 0.00 | 0.83 | 0.65 | 6 | AT1 Cell |
| <i>SPTBN1</i>   | 0.43 | 0.00 | 0.00 | 0.77 | 0.53 | 6 | AT1 Cell |
| <i>SSR2</i>     | 0.54 | 0.00 | 0.00 | 0.56 | 0.33 | 6 | AT1 Cell |
| <i>CREBRF</i>   | 0.50 | 0.00 | 0.00 | 0.26 | 0.11 | 6 | AT1 Cell |
| <i>TM9SF3</i>   | 0.52 | 0.00 | 0.00 | 0.54 | 0.32 | 6 | AT1 Cell |
| <i>SYPL1</i>    | 0.48 | 0.00 | 0.00 | 0.47 | 0.25 | 6 | AT1 Cell |
| <i>DRAP1</i>    | 0.50 | 0.00 | 0.00 | 0.44 | 0.24 | 6 | AT1 Cell |
| <i>AKAP13</i>   | 0.43 | 0.00 | 0.00 | 0.47 | 0.25 | 6 | AT1 Cell |
| <i>TAOK3</i>    | 0.43 | 0.00 | 0.00 | 0.37 | 0.18 | 6 | AT1 Cell |
| <i>ROCK1</i>    | 0.50 | 0.00 | 0.00 | 0.54 | 0.33 | 6 | AT1 Cell |

|                 |      |      |      |      |      |   |          |
|-----------------|------|------|------|------|------|---|----------|
| <i>CDKN1B</i>   | 0.50 | 0.00 | 0.00 | 0.38 | 0.19 | 6 | AT1 Cell |
| <i>AKAP9</i>    | 0.48 | 0.00 | 0.00 | 0.55 | 0.34 | 6 | AT1 Cell |
| <i>SLC12A2</i>  | 0.46 | 0.00 | 0.00 | 0.31 | 0.14 | 6 | AT1 Cell |
| <i>SRSF11</i>   | 0.56 | 0.00 | 0.00 | 0.66 | 0.48 | 6 | AT1 Cell |
| <i>CD2AP</i>    | 0.42 | 0.00 | 0.00 | 0.54 | 0.31 | 6 | AT1 Cell |
| <i>COL4A2</i>   | 0.39 | 0.00 | 0.00 | 0.67 | 0.44 | 6 | AT1 Cell |
| <i>ZFHX3</i>    | 0.50 | 0.00 | 0.00 | 0.34 | 0.16 | 6 | AT1 Cell |
| <i>ABCD3</i>    | 0.42 | 0.00 | 0.00 | 0.35 | 0.17 | 6 | AT1 Cell |
| <i>PHLDB2</i>   | 0.44 | 0.00 | 0.00 | 0.49 | 0.27 | 6 | AT1 Cell |
| <i>DNAJC3</i>   | 0.49 | 0.00 | 0.00 | 0.44 | 0.25 | 6 | AT1 Cell |
| <i>TJP1</i>     | 0.43 | 0.00 | 0.00 | 0.35 | 0.17 | 6 | AT1 Cell |
| <i>CAB39</i>    | 0.45 | 0.00 | 0.00 | 0.31 | 0.14 | 6 | AT1 Cell |
| <i>LRRFIP1</i>  | 0.44 | 0.00 | 0.00 | 0.45 | 0.25 | 6 | AT1 Cell |
| <i>MYO9A</i>    | 0.53 | 0.00 | 0.00 | 0.27 | 0.12 | 6 | AT1 Cell |
| <i>DRAM1</i>    | 0.29 | 0.00 | 0.00 | 0.27 | 0.12 | 6 | AT1 Cell |
| <i>TMBIM6</i>   | 0.42 | 0.00 | 0.00 | 0.61 | 0.39 | 6 | AT1 Cell |
| <i>OSBPL9</i>   | 0.45 | 0.00 | 0.00 | 0.27 | 0.12 | 6 | AT1 Cell |
| <i>LAMP1</i>    | 0.42 | 0.00 | 0.00 | 0.64 | 0.42 | 6 | AT1 Cell |
| <i>SRRM2</i>    | 0.40 | 0.00 | 0.00 | 0.75 | 0.58 | 6 | AT1 Cell |
| <i>SEC14L1</i>  | 0.43 | 0.00 | 0.00 | 0.26 | 0.11 | 6 | AT1 Cell |
| <i>YPEL3</i>    | 0.37 | 0.00 | 0.00 | 0.37 | 0.19 | 6 | AT1 Cell |
| <i>WWTR1</i>    | 0.48 | 0.00 | 0.00 | 0.29 | 0.14 | 6 | AT1 Cell |
| <i>ACTN1</i>    | 0.46 | 0.00 | 0.00 | 0.41 | 0.23 | 6 | AT1 Cell |
| <i>COL4A3BP</i> | 0.41 | 0.00 | 0.00 | 0.29 | 0.14 | 6 | AT1 Cell |
| <i>SYNE2</i>    | 0.47 | 0.00 | 0.00 | 0.28 | 0.13 | 6 | AT1 Cell |
| <i>JUND</i>     | 0.43 | 0.00 | 0.00 | 0.45 | 0.26 | 6 | AT1 Cell |
| <i>RHOA</i>     | 0.45 | 0.00 | 0.00 | 0.67 | 0.48 | 6 | AT1 Cell |
| <i>SFTPB</i>    | 0.27 | 0.00 | 0.00 | 0.35 | 0.17 | 6 | AT1 Cell |
| <i>KRAS</i>     | 0.47 | 0.00 | 0.00 | 0.34 | 0.17 | 6 | AT1 Cell |
| <i>BRI3</i>     | 0.42 | 0.00 | 0.00 | 0.37 | 0.20 | 6 | AT1 Cell |
| <i>SLC34A2</i>  | 0.42 | 0.00 | 0.00 | 0.31 | 0.15 | 6 | AT1 Cell |
| <i>STX7</i>     | 0.50 | 0.00 | 0.00 | 0.28 | 0.14 | 6 | AT1 Cell |
| <i>TBRG1</i>    | 0.43 | 0.00 | 0.00 | 0.46 | 0.27 | 6 | AT1 Cell |
| <i>TSC22D3</i>  | 0.38 | 0.00 | 0.00 | 0.40 | 0.22 | 6 | AT1 Cell |
| <i>CAV2</i>     | 0.34 | 0.00 | 0.00 | 0.40 | 0.22 | 6 | AT1 Cell |
| <i>S100G</i>    | 0.42 | 0.00 | 0.00 | 0.26 | 0.12 | 6 | AT1 Cell |
| <i>SVIL</i>     | 0.46 | 0.00 | 0.00 | 0.31 | 0.16 | 6 | AT1 Cell |
| <i>HPCAL1</i>   | 0.37 | 0.00 | 0.00 | 0.29 | 0.15 | 6 | AT1 Cell |
| <i>ACADL</i>    | 0.36 | 0.00 | 0.00 | 0.36 | 0.20 | 6 | AT1 Cell |
| <i>TBL1X</i>    | 0.39 | 0.00 | 0.00 | 0.39 | 0.22 | 6 | AT1 Cell |
| <i>APLP2</i>    | 0.41 | 0.00 | 0.00 | 0.58 | 0.40 | 6 | AT1 Cell |
| <i>HMGN1</i>    | 0.34 | 0.00 | 0.00 | 0.64 | 0.45 | 6 | AT1 Cell |
| <i>BAG1</i>     | 0.44 | 0.00 | 0.00 | 0.39 | 0.23 | 6 | AT1 Cell |

|                  |      |      |      |      |      |   |          |
|------------------|------|------|------|------|------|---|----------|
| <i>MBNL1</i>     | 0.35 | 0.00 | 0.00 | 0.42 | 0.25 | 6 | AT1 Cell |
| <i>ATP2B1</i>    | 0.29 | 0.00 | 0.00 | 0.75 | 0.55 | 6 | AT1 Cell |
| <i>SNX4</i>      | 0.37 | 0.00 | 0.00 | 0.40 | 0.24 | 6 | AT1 Cell |
| <i>PARVA</i>     | 0.42 | 0.00 | 0.00 | 0.29 | 0.15 | 6 | AT1 Cell |
| <i>SECISBP2L</i> | 0.36 | 0.00 | 0.00 | 0.31 | 0.17 | 6 | AT1 Cell |
| <i>KIF5B</i>     | 0.34 | 0.00 | 0.00 | 0.64 | 0.47 | 6 | AT1 Cell |
| <i>LARP4B</i>    | 0.33 | 0.00 | 0.00 | 0.26 | 0.13 | 6 | AT1 Cell |
| <i>TMEM59</i>    | 0.38 | 0.00 | 0.00 | 0.59 | 0.42 | 6 | AT1 Cell |
| <i>PPP2R5A</i>   | 0.34 | 0.00 | 0.00 | 0.27 | 0.14 | 6 | AT1 Cell |
| <i>PHF3</i>      | 0.35 | 0.00 | 0.00 | 0.37 | 0.22 | 6 | AT1 Cell |
| <i>ADIPOR1</i>   | 0.34 | 0.00 | 0.00 | 0.37 | 0.22 | 6 | AT1 Cell |
| <i>ATP1A1</i>    | 0.33 | 0.00 | 0.00 | 0.27 | 0.14 | 6 | AT1 Cell |
| <i>PKM</i>       | 0.37 | 0.00 | 0.00 | 0.39 | 0.23 | 6 | AT1 Cell |
| <i>ANKRD12</i>   | 0.42 | 0.00 | 0.00 | 0.41 | 0.26 | 6 | AT1 Cell |
| <i>ARID4B</i>    | 0.36 | 0.00 | 0.00 | 0.48 | 0.32 | 6 | AT1 Cell |
| <i>GAS6</i>      | 0.34 | 0.00 | 0.00 | 0.29 | 0.15 | 6 | AT1 Cell |
| <i>USP34</i>     | 0.35 | 0.00 | 0.00 | 0.38 | 0.23 | 6 | AT1 Cell |
| <i>DUSP1</i>     | 0.33 | 0.00 | 0.00 | 0.30 | 0.17 | 6 | AT1 Cell |
| <i>PTOV1</i>     | 0.40 | 0.00 | 0.00 | 0.27 | 0.14 | 6 | AT1 Cell |
| <i>TRA2A</i>     | 0.39 | 0.00 | 0.00 | 0.35 | 0.20 | 6 | AT1 Cell |
| <i>SPTAN1</i>    | 0.39 | 0.00 | 0.00 | 0.29 | 0.16 | 6 | AT1 Cell |
| <i>LRRFIP2</i>   | 0.36 | 0.00 | 0.00 | 0.25 | 0.13 | 6 | AT1 Cell |
| <i>ZFP91</i>     | 0.34 | 0.00 | 0.00 | 0.42 | 0.27 | 6 | AT1 Cell |
| <i>WASL</i>      | 0.37 | 0.00 | 0.00 | 0.29 | 0.17 | 6 | AT1 Cell |
| <i>PPIC</i>      | 0.33 | 0.00 | 0.00 | 0.56 | 0.38 | 6 | AT1 Cell |
| <i>P4HB</i>      | 0.36 | 0.00 | 0.00 | 0.57 | 0.41 | 6 | AT1 Cell |
| <i>JUP</i>       | 0.26 | 0.00 | 0.00 | 0.29 | 0.16 | 6 | AT1 Cell |
| <i>PLS3</i>      | 0.36 | 0.00 | 0.00 | 0.35 | 0.21 | 6 | AT1 Cell |
| <i>BRD7</i>      | 0.31 | 0.00 | 0.00 | 0.40 | 0.25 | 6 | AT1 Cell |
| <i>EIF1</i>      | 0.27 | 0.00 | 0.00 | 0.78 | 0.69 | 6 | AT1 Cell |
| <i>MLF2</i>      | 0.39 | 0.00 | 0.00 | 0.27 | 0.15 | 6 | AT1 Cell |
| <i>ADAM10</i>    | 0.34 | 0.00 | 0.00 | 0.30 | 0.17 | 6 | AT1 Cell |
| <i>TM2D2</i>     | 0.35 | 0.00 | 0.00 | 0.27 | 0.15 | 6 | AT1 Cell |
| <i>LAMC1</i>     | 0.34 | 0.00 | 0.00 | 0.27 | 0.16 | 6 | AT1 Cell |
| <i>ATP6V1E1</i>  | 0.29 | 0.00 | 0.00 | 0.39 | 0.25 | 6 | AT1 Cell |
| <i>SIVA1</i>     | 0.30 | 0.00 | 0.00 | 0.27 | 0.16 | 6 | AT1 Cell |
| <i>UBL3</i>      | 0.29 | 0.00 | 0.00 | 0.30 | 0.18 | 6 | AT1 Cell |
| <i>ANXA5</i>     | 0.35 | 0.00 | 0.00 | 0.56 | 0.42 | 6 | AT1 Cell |
| <i>LAMP2</i>     | 0.28 | 0.00 | 0.00 | 0.39 | 0.25 | 6 | AT1 Cell |
| <i>FOS</i>       | 0.29 | 0.00 | 0.00 | 0.29 | 0.17 | 6 | AT1 Cell |
| <i>RAB5A</i>     | 0.30 | 0.00 | 0.00 | 0.26 | 0.15 | 6 | AT1 Cell |
| <i>RPL22L1</i>   | 0.27 | 0.00 | 0.00 | 0.65 | 0.53 | 6 | AT1 Cell |
| <i>TMED2</i>     | 0.31 | 0.00 | 0.00 | 0.39 | 0.26 | 6 | AT1 Cell |

|                  |      |      |      |      |      |   |          |
|------------------|------|------|------|------|------|---|----------|
| <i>CFL2</i>      | 0.28 | 0.00 | 0.00 | 0.36 | 0.23 | 6 | AT1 Cell |
| <i>EMD</i>       | 0.28 | 0.00 | 0.00 | 0.52 | 0.37 | 6 | AT1 Cell |
| <i>KTN1</i>      | 0.29 | 0.00 | 0.00 | 0.52 | 0.38 | 6 | AT1 Cell |
| <i>BCAP31</i>    | 0.33 | 0.00 | 0.00 | 0.33 | 0.21 | 6 | AT1 Cell |
| <i>ATP6V1G1</i>  | 0.27 | 0.00 | 0.00 | 0.47 | 0.34 | 6 | AT1 Cell |
| <i>ORC5</i>      | 0.26 | 0.00 | 0.00 | 0.64 | 0.51 | 6 | AT1 Cell |
| <i>ATXN10</i>    | 0.32 | 0.00 | 0.00 | 0.30 | 0.19 | 6 | AT1 Cell |
| <i>ZC3H7A</i>    | 0.29 | 0.00 | 0.00 | 0.39 | 0.26 | 6 | AT1 Cell |
| <i>OS9</i>       | 0.34 | 0.00 | 0.00 | 0.32 | 0.21 | 6 | AT1 Cell |
| <i>TMED10</i>    | 0.28 | 0.00 | 0.00 | 0.48 | 0.35 | 6 | AT1 Cell |
| <i>CHMP2B</i>    | 0.29 | 0.00 | 0.00 | 0.26 | 0.16 | 6 | AT1 Cell |
| <i>MMP14</i>     | 0.27 | 0.00 | 0.00 | 0.36 | 0.25 | 6 | AT1 Cell |
| <i>TMEM176B</i>  | 0.31 | 0.00 | 0.00 | 0.44 | 0.32 | 6 | AT1 Cell |
| <i>H2AFJ</i>     | 0.27 | 0.00 | 0.00 | 0.43 | 0.32 | 6 | AT1 Cell |
| <i>TUBB4B</i>    | 0.36 | 0.00 | 0.00 | 0.26 | 0.18 | 6 | AT1 Cell |
| <i>RAB6A</i>     | 0.26 | 0.00 | 0.00 | 0.29 | 0.21 | 6 | AT1 Cell |
| <i>IGKC</i>      | 3.87 | 0.00 | 0.00 | 0.86 | 0.01 | 7 | B Cell   |
| <i>MS4A1</i>     | 3.58 | 0.00 | 0.00 | 0.86 | 0.01 | 7 | B Cell   |
| <i>IGHM</i>      | 3.50 | 0.00 | 0.00 | 0.89 | 0.02 | 7 | B Cell   |
| <i>LY6D</i>      | 3.18 | 0.00 | 0.00 | 0.79 | 0.01 | 7 | B Cell   |
| <i>CD79A</i>     | 3.14 | 0.00 | 0.00 | 0.81 | 0.01 | 7 | B Cell   |
| <i>IGLL5</i>     | 2.99 | 0.00 | 0.00 | 0.59 | 0.01 | 7 | B Cell   |
| <i>CD79B</i>     | 2.98 | 0.00 | 0.00 | 0.78 | 0.02 | 7 | B Cell   |
| <i>CD37</i>      | 2.57 | 0.00 | 0.00 | 0.72 | 0.04 | 7 | B Cell   |
| <i>CD74</i>      | 2.25 | 0.00 | 0.00 | 0.81 | 0.12 | 7 | B Cell   |
| <i>VPREB3</i>    | 2.12 | 0.00 | 0.00 | 0.30 | 0.00 | 7 | B Cell   |
| <i>MZB1</i>      | 2.09 | 0.00 | 0.00 | 0.44 | 0.00 | 7 | B Cell   |
| <i>HLA-DQB1</i>  | 2.07 | 0.00 | 0.00 | 0.60 | 0.06 | 7 | B Cell   |
| <i>BANK1</i>     | 2.03 | 0.00 | 0.00 | 0.40 | 0.01 | 7 | B Cell   |
| <i>SIGLEC10</i>  | 1.96 | 0.00 | 0.00 | 0.41 | 0.01 | 7 | B Cell   |
| <i>PTPRCAP</i>   | 1.95 | 0.00 | 0.00 | 0.57 | 0.04 | 7 | B Cell   |
| <i>CD19</i>      | 1.93 | 0.00 | 0.00 | 0.41 | 0.00 | 7 | B Cell   |
| <i>FCRLA</i>     | 1.92 | 0.00 | 0.00 | 0.40 | 0.00 | 7 | B Cell   |
| <i>CD52</i>      | 1.84 | 0.00 | 0.00 | 0.87 | 0.16 | 7 | B Cell   |
| <i>PAX5</i>      | 1.82 | 0.00 | 0.00 | 0.36 | 0.00 | 7 | B Cell   |
| <i>TNFRSF13C</i> | 1.75 | 0.00 | 0.00 | 0.32 | 0.00 | 7 | B Cell   |
| <i>FAM129C</i>   | 1.70 | 0.00 | 0.00 | 0.32 | 0.01 | 7 | B Cell   |
| <i>SP110</i>     | 1.60 | 0.00 | 0.00 | 0.40 | 0.06 | 7 | B Cell   |
| <i>PLAC8</i>     | 1.59 | 0.00 | 0.00 | 0.74 | 0.14 | 7 | B Cell   |
| <i>SPIB</i>      | 1.56 | 0.00 | 0.00 | 0.28 | 0.00 | 7 | B Cell   |
| <i>LY86</i>      | 1.55 | 0.00 | 0.00 | 0.43 | 0.05 | 7 | B Cell   |
| <i>EBF1</i>      | 1.50 | 0.00 | 0.00 | 0.32 | 0.04 | 7 | B Cell   |
| <i>SYK</i>       | 1.50 | 0.00 | 0.00 | 0.35 | 0.04 | 7 | B Cell   |

|                  |      |      |      |      |      |   |        |
|------------------|------|------|------|------|------|---|--------|
| <i>BCL11A</i>    | 1.44 | 0.00 | 0.00 | 0.26 | 0.02 | 7 | B Cell |
| <i>RALGPS2</i>   | 1.42 | 0.00 | 0.00 | 0.34 | 0.05 | 7 | B Cell |
| <i>RAC2</i>      | 1.41 | 0.00 | 0.00 | 0.51 | 0.09 | 7 | B Cell |
| <i>TNFRSF13B</i> | 1.39 | 0.00 | 0.00 | 0.31 | 0.03 | 7 | B Cell |
| <i>RNASE6</i>    | 1.35 | 0.00 | 0.00 | 0.34 | 0.04 | 7 | B Cell |
| <i>ARHGDI B</i>  | 1.33 | 0.00 | 0.00 | 0.61 | 0.15 | 7 | B Cell |
| <i>APOBEC3H</i>  | 1.32 | 0.00 | 0.00 | 0.33 | 0.06 | 7 | B Cell |
| <i>PTPN6</i>     | 1.31 | 0.00 | 0.00 | 0.39 | 0.07 | 7 | B Cell |
| <i>UNC93B1</i>   | 1.26 | 0.00 | 0.00 | 0.32 | 0.06 | 7 | B Cell |
| <i>CD53</i>      | 1.22 | 0.00 | 0.00 | 0.40 | 0.08 | 7 | B Cell |
| <i>ARHGAP30</i>  | 1.21 | 0.00 | 0.00 | 0.40 | 0.09 | 7 | B Cell |
| <i>LSP1</i>      | 1.16 | 0.00 | 0.00 | 0.58 | 0.17 | 7 | B Cell |
| <i>PTPRC</i>     | 1.00 | 0.00 | 0.00 | 0.51 | 0.13 | 7 | B Cell |
| <i>CORO1A</i>    | 1.08 | 0.00 | 0.00 | 0.39 | 0.09 | 7 | B Cell |
| <i>CD55</i>      | 1.34 | 0.00 | 0.00 | 0.29 | 0.06 | 7 | B Cell |
| <i>NCF1</i>      | 1.09 | 0.00 | 0.00 | 0.29 | 0.05 | 7 | B Cell |
| <i>VAR5</i>      | 1.17 | 0.00 | 0.00 | 0.30 | 0.06 | 7 | B Cell |
| <i>WDR89</i>     | 0.69 | 0.00 | 0.00 | 0.94 | 0.82 | 7 | B Cell |
| <i>LY6E</i>      | 0.85 | 0.00 | 0.00 | 0.79 | 0.42 | 7 | B Cell |
| <i>PARP1</i>     | 1.19 | 0.00 | 0.00 | 0.34 | 0.09 | 7 | B Cell |
| <i>HCLS1</i>     | 0.95 | 0.00 | 0.00 | 0.29 | 0.07 | 7 | B Cell |
| <i>FAM111A</i>   | 1.09 | 0.00 | 0.00 | 0.40 | 0.13 | 7 | B Cell |
| <i>MT-CO1</i>    | 0.46 | 0.00 | 0.00 | 0.99 | 0.95 | 7 | B Cell |
| <i>SUB1</i>      | 1.07 | 0.00 | 0.00 | 0.72 | 0.51 | 7 | B Cell |
| <i>PTPN18</i>    | 0.95 | 0.00 | 0.00 | 0.39 | 0.12 | 7 | B Cell |
| <i>LIMD2</i>     | 1.08 | 0.00 | 0.00 | 0.40 | 0.14 | 7 | B Cell |
| <i>SNX5</i>      | 1.12 | 0.00 | 0.00 | 0.36 | 0.12 | 7 | B Cell |
| <i>FAU</i>       | 0.55 | 0.00 | 0.00 | 0.95 | 0.87 | 7 | B Cell |
| <i>SERP1</i>     | 1.08 | 0.00 | 0.00 | 0.51 | 0.23 | 7 | B Cell |
| <i>PSMB8</i>     | 0.95 | 0.00 | 0.00 | 0.46 | 0.18 | 7 | B Cell |
| <i>LRRC58</i>    | 0.54 | 0.00 | 0.00 | 0.97 | 0.85 | 7 | B Cell |
| <i>RPL18A</i>    | 0.58 | 0.00 | 0.00 | 0.95 | 0.83 | 7 | B Cell |
| <i>RPLP1</i>     | 0.50 | 0.00 | 0.00 | 0.97 | 0.91 | 7 | B Cell |
| <i>SP140</i>     | 0.92 | 0.00 | 0.00 | 0.27 | 0.07 | 7 | B Cell |
| <i>RPL10A</i>    | 0.63 | 0.00 | 0.00 | 0.90 | 0.76 | 7 | B Cell |
| <i>SH3BP5</i>    | 1.02 | 0.00 | 0.00 | 0.46 | 0.19 | 7 | B Cell |
| <i>SH3BGR L3</i> | 0.89 | 0.00 | 0.00 | 0.63 | 0.35 | 7 | B Cell |
| <i>RPS20</i>     | 0.60 | 0.00 | 0.00 | 0.91 | 0.80 | 7 | B Cell |
| <i>MEF2C</i>     | 1.11 | 0.00 | 0.00 | 0.42 | 0.17 | 7 | B Cell |
| <i>EEF1B2</i>    | 0.67 | 0.00 | 0.00 | 0.80 | 0.65 | 7 | B Cell |
| <i>GIMAP4</i>    | 0.93 | 0.00 | 0.00 | 0.42 | 0.17 | 7 | B Cell |
| <i>SNX2</i>      | 1.05 | 0.00 | 0.00 | 0.39 | 0.16 | 7 | B Cell |
| <i>CRIP1</i>     | 0.95 | 0.00 | 0.00 | 0.72 | 0.47 | 7 | B Cell |

|                  |      |      |      |      |      |   |        |
|------------------|------|------|------|------|------|---|--------|
| <i>PIM1</i>      | 1.04 | 0.00 | 0.00 | 0.26 | 0.08 | 7 | B Cell |
| <i>RPL8</i>      | 0.55 | 0.00 | 0.00 | 0.90 | 0.81 | 7 | B Cell |
| <i>NOL7</i>      | 0.91 | 0.00 | 0.00 | 0.59 | 0.34 | 7 | B Cell |
| <i>RABGAP1L</i>  | 0.99 | 0.00 | 0.00 | 0.27 | 0.08 | 7 | B Cell |
| <i>GIMAP6</i>    | 0.92 | 0.00 | 0.00 | 0.38 | 0.15 | 7 | B Cell |
| <i>EEF1G</i>     | 0.83 | 0.00 | 0.00 | 0.67 | 0.46 | 7 | B Cell |
| <i>TMSB4X</i>    | 0.33 | 0.00 | 0.00 | 0.98 | 0.90 | 7 | B Cell |
| <i>GIMAP1</i>    | 0.87 | 0.00 | 0.00 | 0.35 | 0.13 | 7 | B Cell |
| <i>SERBP1</i>    | 0.63 | 0.00 | 0.00 | 0.83 | 0.73 | 7 | B Cell |
| <i>RPL6</i>      | 0.46 | 0.00 | 0.00 | 0.95 | 0.88 | 7 | B Cell |
| <i>ITGA4</i>     | 0.80 | 0.00 | 0.00 | 0.28 | 0.09 | 7 | B Cell |
| <i>SEC11C</i>    | 0.94 | 0.00 | 0.00 | 0.38 | 0.16 | 7 | B Cell |
| <i>CAPG</i>      | 0.92 | 0.00 | 0.00 | 0.28 | 0.09 | 7 | B Cell |
| <i>LCP1</i>      | 0.79 | 0.00 | 0.00 | 0.45 | 0.20 | 7 | B Cell |
| <i>RPLP2</i>     | 0.48 | 0.00 | 0.00 | 0.91 | 0.83 | 7 | B Cell |
| <i>NAP1L1</i>    | 0.78 | 0.00 | 0.00 | 0.66 | 0.47 | 7 | B Cell |
| <i>STRBP</i>     | 0.93 | 0.00 | 0.00 | 0.27 | 0.09 | 7 | B Cell |
| <i>SHISA5</i>    | 0.94 | 0.00 | 0.00 | 0.43 | 0.20 | 7 | B Cell |
| <i>GMFG</i>      | 0.88 | 0.00 | 0.00 | 0.35 | 0.14 | 7 | B Cell |
| <i>TCOF1</i>     | 0.90 | 0.00 | 0.00 | 0.28 | 0.10 | 7 | B Cell |
| <i>ARID3A</i>    | 0.92 | 0.00 | 0.00 | 0.27 | 0.09 | 7 | B Cell |
| <i>IL2RG</i>     | 0.82 | 0.00 | 0.00 | 0.27 | 0.09 | 7 | B Cell |
| <i>MT-CO3</i>    | 0.42 | 0.00 | 0.00 | 0.95 | 0.89 | 7 | B Cell |
| <i>NAPSA</i>     | 0.39 | 0.00 | 0.00 | 0.47 | 0.19 | 7 | B Cell |
| <i>APBB1IP</i>   | 0.66 | 0.00 | 0.00 | 0.26 | 0.08 | 7 | B Cell |
| <i>GRAP</i>      | 0.83 | 0.00 | 0.00 | 0.31 | 0.12 | 7 | B Cell |
| <i>ARPC5L</i>    | 0.97 | 0.00 | 0.00 | 0.35 | 0.15 | 7 | B Cell |
| <i>TPM3</i>      | 0.59 | 0.00 | 0.00 | 0.81 | 0.67 | 7 | B Cell |
| <i>RPS4X</i>     | 0.39 | 0.00 | 0.00 | 0.95 | 0.88 | 7 | B Cell |
| <i>MYCBP2</i>    | 0.95 | 0.00 | 0.00 | 0.43 | 0.22 | 7 | B Cell |
| <i>CYTIP</i>     | 0.70 | 0.00 | 0.00 | 0.25 | 0.08 | 7 | B Cell |
| <i>EZR</i>       | 0.81 | 0.00 | 0.00 | 0.41 | 0.20 | 7 | B Cell |
| <i>HSP90AB1</i>  | 0.46 | 0.00 | 0.00 | 0.92 | 0.89 | 7 | B Cell |
| <i>KLF2</i>      | 0.78 | 0.00 | 0.00 | 0.41 | 0.19 | 7 | B Cell |
| <i>DNAJC9</i>    | 0.91 | 0.00 | 0.00 | 0.27 | 0.10 | 7 | B Cell |
| <i>SWAP70</i>    | 0.90 | 0.00 | 0.00 | 0.27 | 0.10 | 7 | B Cell |
| <i>MT-ND1</i>    | 0.37 | 0.00 | 0.00 | 0.95 | 0.92 | 7 | B Cell |
| <i>NME1</i>      | 0.90 | 0.00 | 0.00 | 0.38 | 0.18 | 7 | B Cell |
| <i>HIST1H2AB</i> | 1.56 | 0.00 | 0.00 | 0.27 | 0.11 | 7 | B Cell |
| <i>CYBA</i>      | 0.60 | 0.00 | 0.00 | 0.53 | 0.31 | 7 | B Cell |
| <i>COTL1</i>     | 0.74 | 0.00 | 0.00 | 0.36 | 0.17 | 7 | B Cell |
| <i>H3F3A</i>     | 0.57 | 0.00 | 0.00 | 0.76 | 0.62 | 7 | B Cell |
| <i>MT-ND5</i>    | 0.48 | 0.00 | 0.00 | 0.84 | 0.75 | 7 | B Cell |

|                  |      |      |      |      |      |   |        |
|------------------|------|------|------|------|------|---|--------|
| <i>MT-CO2</i>    | 0.42 | 0.00 | 0.00 | 0.87 | 0.79 | 7 | B Cell |
| <i>RPS13</i>     | 0.50 | 0.00 | 0.00 | 0.79 | 0.66 | 7 | B Cell |
| <i>BIN1</i>      | 0.84 | 0.00 | 0.00 | 0.26 | 0.10 | 7 | B Cell |
| <i>ZNF706</i>    | 0.77 | 0.00 | 0.00 | 0.50 | 0.32 | 7 | B Cell |
| <i>NOP58</i>     | 0.89 | 0.00 | 0.00 | 0.42 | 0.23 | 7 | B Cell |
| <i>ARHGAP17</i>  | 0.82 | 0.00 | 0.00 | 0.33 | 0.16 | 7 | B Cell |
| <i>DNAJC2</i>    | 0.77 | 0.00 | 0.00 | 0.36 | 0.18 | 7 | B Cell |
| <i>CCM2</i>      | 0.85 | 0.00 | 0.00 | 0.25 | 0.11 | 7 | B Cell |
| <i>CRLF3</i>     | 0.75 | 0.00 | 0.00 | 0.28 | 0.12 | 7 | B Cell |
| <i>ACTR3</i>     | 0.69 | 0.00 | 0.00 | 0.51 | 0.32 | 7 | B Cell |
| <i>HNRNPA2B1</i> | 0.50 | 0.00 | 0.00 | 0.79 | 0.72 | 7 | B Cell |
| <i>NOP56</i>     | 0.84 | 0.00 | 0.00 | 0.36 | 0.19 | 7 | B Cell |
| <i>LYN</i>       | 0.70 | 0.00 | 0.00 | 0.27 | 0.12 | 7 | B Cell |
| <i>ITSN2</i>     | 0.77 | 0.00 | 0.00 | 0.41 | 0.23 | 7 | B Cell |
| <i>ORC5</i>      | 0.55 | 0.00 | 0.00 | 0.66 | 0.51 | 7 | B Cell |
| <i>PTBP3</i>     | 0.65 | 0.00 | 0.00 | 0.50 | 0.32 | 7 | B Cell |
| <i>ARPC5</i>     | 0.50 | 0.00 | 0.00 | 0.70 | 0.57 | 7 | B Cell |
| <i>ETS1</i>      | 0.65 | 0.00 | 0.00 | 0.42 | 0.23 | 7 | B Cell |
| <i>RPL22L1</i>   | 0.52 | 0.00 | 0.00 | 0.67 | 0.53 | 7 | B Cell |
| <i>ERP29</i>     | 0.70 | 0.00 | 0.00 | 0.42 | 0.26 | 7 | B Cell |
| <i>LLPH</i>      | 0.66 | 0.00 | 0.00 | 0.48 | 0.31 | 7 | B Cell |
| <i>ANP32B</i>    | 0.60 | 0.00 | 0.00 | 0.61 | 0.48 | 7 | B Cell |
| <i>KIAA0040</i>  | 0.73 | 0.00 | 0.00 | 0.32 | 0.17 | 7 | B Cell |
| <i>MT-ATP6</i>   | 0.31 | 0.00 | 0.00 | 0.90 | 0.85 | 7 | B Cell |
| <i>PFN1</i>      | 0.55 | 0.00 | 0.00 | 0.62 | 0.49 | 7 | B Cell |
| <i>PDCD4</i>     | 0.71 | 0.00 | 0.00 | 0.36 | 0.20 | 7 | B Cell |
| <i>DDX5</i>      | 0.43 | 0.00 | 0.00 | 0.78 | 0.71 | 7 | B Cell |
| <i>CIB1</i>      | 0.78 | 0.00 | 0.00 | 0.26 | 0.13 | 7 | B Cell |
| <i>SRGN</i>      | 0.30 | 0.00 | 0.00 | 0.53 | 0.31 | 7 | B Cell |
| <i>DNAJC7</i>    | 0.74 | 0.00 | 0.00 | 0.35 | 0.20 | 7 | B Cell |
| <i>HNRNPU</i>    | 0.47 | 0.00 | 0.00 | 0.70 | 0.62 | 7 | B Cell |
| <i>RPS27A</i>    | 0.32 | 0.00 | 0.00 | 0.86 | 0.78 | 7 | B Cell |
| <i>DDX21</i>     | 0.70 | 0.00 | 0.00 | 0.40 | 0.26 | 7 | B Cell |
| <i>ARPC2</i>     | 0.37 | 0.00 | 0.00 | 0.73 | 0.61 | 7 | B Cell |
| <i>LSM4</i>      | 0.64 | 0.00 | 0.00 | 0.34 | 0.20 | 7 | B Cell |
| <i>SMCHD1</i>    | 0.72 | 0.00 | 0.00 | 0.27 | 0.14 | 7 | B Cell |
| <i>PTMA</i>      | 0.32 | 0.00 | 0.00 | 0.93 | 0.92 | 7 | B Cell |
| <i>STK38</i>     | 0.64 | 0.00 | 0.00 | 0.31 | 0.18 | 7 | B Cell |
| <i>RPL7</i>      | 0.26 | 0.00 | 0.00 | 0.84 | 0.77 | 7 | B Cell |
| <i>RAN</i>       | 0.61 | 0.00 | 0.00 | 0.50 | 0.39 | 7 | B Cell |
| <i>RBM3</i>      | 0.54 | 0.00 | 0.00 | 0.52 | 0.41 | 7 | B Cell |
| <i>CCND2</i>     | 0.66 | 0.00 | 0.00 | 0.41 | 0.27 | 7 | B Cell |
| <i>HNRNPCL1</i>  | 0.52 | 0.00 | 0.00 | 0.52 | 0.39 | 7 | B Cell |

|                 |      |      |      |      |      |   |        |
|-----------------|------|------|------|------|------|---|--------|
| <i>HSPE1</i>    | 0.64 | 0.00 | 0.00 | 0.42 | 0.30 | 7 | B Cell |
| <i>GPX1</i>     | 0.38 | 0.00 | 0.00 | 0.57 | 0.44 | 7 | B Cell |
| <i>SLC25A5</i>  | 0.40 | 0.00 | 0.00 | 0.67 | 0.58 | 7 | B Cell |
| <i>SMIM14</i>   | 0.74 | 0.00 | 0.00 | 0.31 | 0.19 | 7 | B Cell |
| <i>EML4</i>     | 0.66 | 0.00 | 0.00 | 0.28 | 0.16 | 7 | B Cell |
| <i>ARPC1B</i>   | 0.45 | 0.00 | 0.00 | 0.50 | 0.36 | 7 | B Cell |
| <i>YEATS4</i>   | 0.62 | 0.00 | 0.00 | 0.29 | 0.17 | 7 | B Cell |
| <i>BTG1</i>     | 0.66 | 0.00 | 0.00 | 0.42 | 0.30 | 7 | B Cell |
| <i>ANP32E</i>   | 0.63 | 0.00 | 0.00 | 0.38 | 0.25 | 7 | B Cell |
| <i>SF3B1</i>    | 0.48 | 0.00 | 0.00 | 0.55 | 0.44 | 7 | B Cell |
| <i>EIF5A</i>    | 0.55 | 0.00 | 0.00 | 0.45 | 0.33 | 7 | B Cell |
| <i>GDI2</i>     | 0.59 | 0.00 | 0.00 | 0.44 | 0.33 | 7 | B Cell |
| <i>IVNS1ABP</i> | 0.49 | 0.00 | 0.00 | 0.33 | 0.20 | 7 | B Cell |
| <i>HMGB2</i>    | 0.97 | 0.00 | 0.00 | 0.47 | 0.38 | 7 | B Cell |
| <i>OAZ1</i>     | 0.39 | 0.00 | 0.00 | 0.69 | 0.63 | 7 | B Cell |
| <i>GRB2</i>     | 0.58 | 0.00 | 0.00 | 0.29 | 0.17 | 7 | B Cell |
| <i>EMG1</i>     | 0.55 | 0.00 | 0.00 | 0.25 | 0.15 | 7 | B Cell |
| <i>S100A10</i>  | 0.47 | 0.00 | 0.00 | 0.52 | 0.41 | 7 | B Cell |
| <i>CDC42SE1</i> | 0.56 | 0.00 | 0.00 | 0.29 | 0.18 | 7 | B Cell |
| <i>GTF2F1</i>   | 0.59 | 0.00 | 0.00 | 0.31 | 0.20 | 7 | B Cell |
| <i>ACIN1</i>    | 0.39 | 0.00 | 0.00 | 0.60 | 0.51 | 7 | B Cell |
| <i>PGLS</i>     | 0.58 | 0.00 | 0.00 | 0.27 | 0.17 | 7 | B Cell |
| <i>MSN</i>      | 0.41 | 0.00 | 0.00 | 0.55 | 0.44 | 7 | B Cell |
| <i>CLTA</i>     | 0.43 | 0.00 | 0.00 | 0.52 | 0.43 | 7 | B Cell |
| <i>PCNA</i>     | 0.63 | 0.00 | 0.00 | 0.26 | 0.16 | 7 | B Cell |
| <i>HNRNPF</i>   | 0.48 | 0.00 | 0.00 | 0.44 | 0.34 | 7 | B Cell |
| <i>FKBP3</i>    | 0.52 | 0.00 | 0.00 | 0.39 | 0.29 | 7 | B Cell |
| <i>PA2G4</i>    | 0.61 | 0.00 | 0.00 | 0.36 | 0.26 | 7 | B Cell |
| <i>DEK</i>      | 0.51 | 0.00 | 0.00 | 0.54 | 0.47 | 7 | B Cell |
| <i>ZNF106</i>   | 0.54 | 0.00 | 0.00 | 0.29 | 0.19 | 7 | B Cell |
| <i>SNRPF</i>    | 0.51 | 0.00 | 0.00 | 0.38 | 0.28 | 7 | B Cell |
| <i>EIF5</i>     | 0.52 | 0.00 | 0.00 | 0.45 | 0.37 | 7 | B Cell |
| <i>HNRNPM</i>   | 0.41 | 0.00 | 0.00 | 0.57 | 0.49 | 7 | B Cell |
| <i>RSL1D1</i>   | 0.55 | 0.00 | 0.00 | 0.37 | 0.27 | 7 | B Cell |
| <i>NT5C</i>     | 0.52 | 0.00 | 0.00 | 0.26 | 0.16 | 7 | B Cell |
| <i>NACA</i>     | 0.33 | 0.00 | 0.00 | 0.66 | 0.61 | 7 | B Cell |
| <i>RRP1</i>     | 0.47 | 0.00 | 0.00 | 0.43 | 0.34 | 7 | B Cell |
| <i>XRN2</i>     | 0.52 | 0.00 | 0.00 | 0.39 | 0.29 | 7 | B Cell |
| <i>RANBP1</i>   | 0.56 | 0.00 | 0.00 | 0.39 | 0.30 | 7 | B Cell |
| <i>POLR1D</i>   | 0.48 | 0.00 | 0.00 | 0.37 | 0.28 | 7 | B Cell |
| <i>PTPN1</i>    | 0.48 | 0.00 | 0.00 | 0.29 | 0.19 | 7 | B Cell |
| <i>TAF1D</i>    | 0.52 | 0.00 | 0.00 | 0.31 | 0.22 | 7 | B Cell |
| <i>SNRPE</i>    | 0.44 | 0.00 | 0.00 | 0.45 | 0.37 | 7 | B Cell |

|                 |      |      |      |      |      |   |        |
|-----------------|------|------|------|------|------|---|--------|
| <i>NUCKS1</i>   | 0.50 | 0.00 | 0.00 | 0.38 | 0.29 | 7 | B Cell |
| <i>SAMHD1</i>   | 0.38 | 0.00 | 0.00 | 0.29 | 0.19 | 7 | B Cell |
| <i>AKAP13</i>   | 0.52 | 0.00 | 0.00 | 0.36 | 0.26 | 7 | B Cell |
| <i>CEBPZ</i>    | 0.51 | 0.00 | 0.00 | 0.26 | 0.17 | 7 | B Cell |
| <i>EIF3CL</i>   | 0.39 | 0.00 | 0.00 | 0.51 | 0.43 | 7 | B Cell |
| <i>RPL36A</i>   | 0.29 | 0.00 | 0.00 | 0.69 | 0.64 | 7 | B Cell |
| <i>SAFB2</i>    | 0.51 | 0.00 | 0.00 | 0.31 | 0.22 | 7 | B Cell |
| <i>ARL6IP1</i>  | 0.41 | 0.00 | 0.00 | 0.57 | 0.50 | 7 | B Cell |
| <i>HSPD1</i>    | 0.50 | 0.00 | 0.00 | 0.34 | 0.26 | 7 | B Cell |
| <i>SRRM2</i>    | 0.32 | 0.00 | 0.00 | 0.63 | 0.59 | 7 | B Cell |
| <i>PDIA4</i>    | 0.52 | 0.00 | 0.00 | 0.29 | 0.21 | 7 | B Cell |
| <i>MIF</i>      | 0.49 | 0.00 | 0.00 | 0.31 | 0.23 | 7 | B Cell |
| <i>DDX46</i>    | 0.43 | 0.00 | 0.00 | 0.38 | 0.30 | 7 | B Cell |
| <i>CLIC1</i>    | 0.35 | 0.00 | 0.00 | 0.47 | 0.39 | 7 | B Cell |
| <i>DHX9</i>     | 0.47 | 0.00 | 0.00 | 0.26 | 0.18 | 7 | B Cell |
| <i>NAA15</i>    | 0.44 | 0.00 | 0.00 | 0.29 | 0.20 | 7 | B Cell |
| <i>EMP3</i>     | 0.42 | 0.00 | 0.00 | 0.33 | 0.24 | 7 | B Cell |
| <i>ACTR2</i>    | 0.39 | 0.00 | 0.00 | 0.36 | 0.27 | 7 | B Cell |
| <i>FGFR10P2</i> | 0.40 | 0.00 | 0.00 | 0.35 | 0.26 | 7 | B Cell |
| <i>SUPT16H</i>  | 0.45 | 0.00 | 0.00 | 0.31 | 0.23 | 7 | B Cell |
| <i>MAT2A</i>    | 0.47 | 0.00 | 0.00 | 0.33 | 0.25 | 7 | B Cell |
| <i>CTCF</i>     | 0.47 | 0.00 | 0.00 | 0.29 | 0.21 | 7 | B Cell |
| <i>MBNL1</i>    | 0.38 | 0.00 | 0.00 | 0.33 | 0.25 | 7 | B Cell |
| <i>YWHAZ</i>    | 0.28 | 0.00 | 0.00 | 0.56 | 0.50 | 7 | B Cell |
| <i>PSME1</i>    | 0.40 | 0.00 | 0.00 | 0.41 | 0.34 | 7 | B Cell |
| <i>SMARCA5</i>  | 0.40 | 0.00 | 0.00 | 0.36 | 0.28 | 7 | B Cell |
| <i>NASP</i>     | 0.47 | 0.00 | 0.00 | 0.26 | 0.19 | 7 | B Cell |
| <i>SLTM</i>     | 0.41 | 0.00 | 0.00 | 0.45 | 0.38 | 7 | B Cell |
| <i>PSMB1</i>    | 0.36 | 0.00 | 0.00 | 0.52 | 0.48 | 7 | B Cell |
| <i>GCLM</i>     | 0.35 | 0.00 | 0.00 | 0.44 | 0.38 | 7 | B Cell |
| <i>HSPA4</i>    | 0.41 | 0.00 | 0.00 | 0.29 | 0.22 | 7 | B Cell |
| <i>CCT2</i>     | 0.43 | 0.00 | 0.00 | 0.33 | 0.26 | 7 | B Cell |
| <i>SERINC3</i>  | 0.38 | 0.00 | 0.00 | 0.37 | 0.30 | 7 | B Cell |
| <i>TCP1</i>     | 0.40 | 0.00 | 0.00 | 0.30 | 0.23 | 7 | B Cell |
| <i>ADD3</i>     | 0.38 | 0.00 | 0.00 | 0.35 | 0.27 | 7 | B Cell |
| <i>MTPN</i>     | 0.38 | 0.00 | 0.00 | 0.33 | 0.26 | 7 | B Cell |
| <i>IRF2</i>     | 0.43 | 0.00 | 0.00 | 0.30 | 0.22 | 7 | B Cell |
| <i>SSRP1</i>    | 0.41 | 0.00 | 0.00 | 0.27 | 0.20 | 7 | B Cell |
| <i>TMOD3</i>    | 0.42 | 0.00 | 0.00 | 0.33 | 0.26 | 7 | B Cell |
| <i>KMT2A</i>    | 0.43 | 0.00 | 0.00 | 0.26 | 0.19 | 7 | B Cell |
| <i>MTDH</i>     | 0.35 | 0.00 | 0.00 | 0.52 | 0.48 | 7 | B Cell |
| <i>TSC22D4</i>  | 0.40 | 0.00 | 0.00 | 0.32 | 0.26 | 7 | B Cell |
| <i>CAPZB</i>    | 0.29 | 0.00 | 0.00 | 0.49 | 0.44 | 7 | B Cell |

|                       |      |      |      |      |      |   |        |
|-----------------------|------|------|------|------|------|---|--------|
| <i>THRAP3</i>         | 0.36 | 0.00 | 0.00 | 0.41 | 0.36 | 7 | B Cell |
| <i>CCT5</i>           | 0.42 | 0.00 | 0.00 | 0.29 | 0.23 | 7 | B Cell |
| <i>ENO1</i>           | 0.36 | 0.00 | 0.00 | 0.25 | 0.19 | 7 | B Cell |
| <i>SNRPD3</i>         | 0.38 | 0.00 | 0.00 | 0.37 | 0.31 | 7 | B Cell |
| <i>CNBP</i>           | 0.34 | 0.00 | 0.00 | 0.50 | 0.47 | 7 | B Cell |
| <i>MT-ND4L</i>        | 0.34 | 0.00 | 0.00 | 0.43 | 0.39 | 7 | B Cell |
| <i>PNN</i>            | 0.27 | 0.00 | 0.00 | 0.55 | 0.51 | 7 | B Cell |
| <i>DDX6</i>           | 0.39 | 0.00 | 0.00 | 0.34 | 0.29 | 7 | B Cell |
| <i>KMT2E</i>          | 0.35 | 0.00 | 0.00 | 0.47 | 0.43 | 7 | B Cell |
| <i>PPP1CA</i>         | 0.34 | 0.00 | 0.00 | 0.38 | 0.33 | 7 | B Cell |
| <i>RBM17</i>          | 0.39 | 0.00 | 0.00 | 0.30 | 0.25 | 7 | B Cell |
| <i>HNRNPDL</i>        | 0.34 | 0.00 | 0.00 | 0.42 | 0.38 | 7 | B Cell |
| <i>TRA2B</i>          | 0.39 | 0.00 | 0.00 | 0.35 | 0.30 | 7 | B Cell |
| <i>H2AFY</i>          | 0.39 | 0.00 | 0.00 | 0.26 | 0.21 | 7 | B Cell |
| <i>SBNO1</i>          | 0.43 | 0.00 | 0.00 | 0.26 | 0.20 | 7 | B Cell |
| <i>NOP10</i>          | 0.38 | 0.00 | 0.00 | 0.34 | 0.29 | 7 | B Cell |
| <i>SNRPD1</i>         | 0.37 | 0.00 | 0.00 | 0.26 | 0.21 | 7 | B Cell |
| <i>SRSF8</i>          | 0.31 | 0.00 | 0.00 | 0.40 | 0.36 | 7 | B Cell |
| <i>SF3B2</i>          | 0.34 | 0.00 | 0.00 | 0.42 | 0.38 | 7 | B Cell |
| <i>JUND</i>           | 0.39 | 0.00 | 0.00 | 0.32 | 0.27 | 7 | B Cell |
| <i>UTP3</i>           | 0.36 | 0.00 | 0.00 | 0.25 | 0.20 | 7 | B Cell |
| <i>HNRNPD</i>         | 0.37 | 0.00 | 0.00 | 0.33 | 0.28 | 7 | B Cell |
| <i>RSBN1L</i>         | 0.37 | 0.00 | 0.00 | 0.29 | 0.24 | 7 | B Cell |
| <i>EIF3K</i>          | 0.32 | 0.00 | 0.00 | 0.40 | 0.37 | 7 | B Cell |
| <i>CCDC50</i>         | 0.34 | 0.00 | 0.00 | 0.30 | 0.25 | 7 | B Cell |
| <i>SRSF3</i>          | 0.34 | 0.00 | 0.00 | 0.32 | 0.28 | 7 | B Cell |
| <i>EIF3E</i>          | 0.26 | 0.00 | 0.00 | 0.46 | 0.43 | 7 | B Cell |
| <i>PRPF4B</i>         | 0.27 | 0.00 | 0.00 | 0.46 | 0.43 | 7 | B Cell |
| <i>BTG2</i>           | 0.32 | 0.00 | 0.00 | 0.26 | 0.22 | 7 | B Cell |
| <i>SEPT11</i>         | 0.32 | 0.00 | 0.01 | 0.27 | 0.23 | 7 | B Cell |
| <i>CCT8</i>           | 0.33 | 0.00 | 0.01 | 0.25 | 0.21 | 7 | B Cell |
| <i>RPL17-C18orf32</i> | 0.27 | 0.00 | 0.01 | 0.35 | 0.31 | 7 | B Cell |
| <i>SCAF11</i>         | 0.33 | 0.00 | 0.01 | 0.31 | 0.27 | 7 | B Cell |
| <i>DUSP11</i>         | 0.30 | 0.00 | 0.01 | 0.29 | 0.24 | 7 | B Cell |
| <i>HNRNPA3</i>        | 0.26 | 0.00 | 0.01 | 0.47 | 0.47 | 7 | B Cell |
| <i>MT-ATP8</i>        | 0.33 | 0.00 | 0.02 | 0.29 | 0.25 | 7 | B Cell |
| <i>ASH1L</i>          | 0.34 | 0.00 | 0.03 | 0.32 | 0.28 | 7 | B Cell |
| <i>PSME2</i>          | 0.28 | 0.00 | 0.04 | 0.29 | 0.26 | 7 | B Cell |
| <i>TRBC1</i>          | 2.96 | 0.00 | 0.00 | 0.70 | 0.01 | 8 | T Cell |
| <i>CCL5</i>           | 2.85 | 0.00 | 0.00 | 0.26 | 0.01 | 8 | T Cell |
| <i>CD3D</i>           | 2.62 | 0.00 | 0.00 | 0.62 | 0.01 | 8 | T Cell |
| <i>CD3G</i>           | 2.59 | 0.00 | 0.00 | 0.65 | 0.01 | 8 | T Cell |
| <i>NKG7</i>           | 2.23 | 0.00 | 0.00 | 0.37 | 0.01 | 8 | T Cell |

|                 |      |      |      |      |      |   |        |
|-----------------|------|------|------|------|------|---|--------|
| <i>TCF7</i>     | 2.07 | 0.00 | 0.00 | 0.46 | 0.04 | 8 | T Cell |
| <i>KLRD1</i>    | 2.04 | 0.00 | 0.00 | 0.29 | 0.00 | 8 | T Cell |
| <i>PTPRCAP</i>  | 2.00 | 0.00 | 0.00 | 0.60 | 0.04 | 8 | T Cell |
| <i>LCK</i>      | 1.98 | 0.00 | 0.00 | 0.44 | 0.01 | 8 | T Cell |
| <i>PTPRC</i>    | 1.96 | 0.00 | 0.00 | 0.75 | 0.12 | 8 | T Cell |
| <i>IL7R</i>     | 1.95 | 0.00 | 0.00 | 0.34 | 0.02 | 8 | T Cell |
| <i>RAC2</i>     | 1.88 | 0.00 | 0.00 | 0.65 | 0.08 | 8 | T Cell |
| <i>CD52</i>     | 1.86 | 0.00 | 0.00 | 0.86 | 0.16 | 8 | T Cell |
| <i>CCR7</i>     | 1.84 | 0.00 | 0.00 | 0.29 | 0.01 | 8 | T Cell |
| <i>SELPLG</i>   | 1.75 | 0.00 | 0.00 | 0.45 | 0.04 | 8 | T Cell |
| <i>HCST</i>     | 1.72 | 0.00 | 0.00 | 0.40 | 0.03 | 8 | T Cell |
| <i>LEF1</i>     | 1.71 | 0.00 | 0.00 | 0.33 | 0.03 | 8 | T Cell |
| <i>CD27</i>     | 1.66 | 0.00 | 0.00 | 0.32 | 0.01 | 8 | T Cell |
| <i>SEPT1</i>    | 1.65 | 0.00 | 0.00 | 0.40 | 0.03 | 8 | T Cell |
| <i>SHISA5</i>   | 1.65 | 0.00 | 0.00 | 0.66 | 0.19 | 8 | T Cell |
| <i>THY1</i>     | 1.65 | 0.00 | 0.00 | 0.37 | 0.03 | 8 | T Cell |
| <i>SKAP1</i>    | 1.59 | 0.00 | 0.00 | 0.33 | 0.01 | 8 | T Cell |
| <i>BCL11B</i>   | 1.59 | 0.00 | 0.00 | 0.28 | 0.01 | 8 | T Cell |
| <i>LIMD2</i>    | 1.58 | 0.00 | 0.00 | 0.57 | 0.13 | 8 | T Cell |
| <i>CD3E</i>     | 1.54 | 0.00 | 0.00 | 0.29 | 0.00 | 8 | T Cell |
| <i>GIMAP4</i>   | 1.53 | 0.00 | 0.00 | 0.61 | 0.16 | 8 | T Cell |
| <i>ARHGDIB</i>  | 1.52 | 0.00 | 0.00 | 0.68 | 0.15 | 8 | T Cell |
| <i>SP140</i>    | 1.52 | 0.00 | 0.00 | 0.42 | 0.06 | 8 | T Cell |
| <i>EPSTI1</i>   | 1.52 | 0.00 | 0.00 | 0.33 | 0.03 | 8 | T Cell |
| <i>SELL</i>     | 1.50 | 0.00 | 0.00 | 0.30 | 0.03 | 8 | T Cell |
| <i>CD53</i>     | 1.48 | 0.00 | 0.00 | 0.46 | 0.07 | 8 | T Cell |
| <i>IL2RG</i>    | 1.46 | 0.00 | 0.00 | 0.45 | 0.08 | 8 | T Cell |
| <i>SATB1</i>    | 1.42 | 0.00 | 0.00 | 0.27 | 0.03 | 8 | T Cell |
| <i>CYTIP</i>    | 1.37 | 0.00 | 0.00 | 0.41 | 0.08 | 8 | T Cell |
| <i>LAPTM5</i>   | 1.36 | 0.00 | 0.00 | 0.60 | 0.12 | 8 | T Cell |
| <i>BIN2</i>     | 1.36 | 0.00 | 0.00 | 0.33 | 0.04 | 8 | T Cell |
| <i>DGKA</i>     | 1.35 | 0.00 | 0.00 | 0.29 | 0.04 | 8 | T Cell |
| <i>PTPN18</i>   | 1.35 | 0.00 | 0.00 | 0.50 | 0.12 | 8 | T Cell |
| <i>ITGB7</i>    | 1.32 | 0.00 | 0.00 | 0.30 | 0.02 | 8 | T Cell |
| <i>TBC1D10C</i> | 1.30 | 0.00 | 0.00 | 0.28 | 0.02 | 8 | T Cell |
| <i>CORO1A</i>   | 1.22 | 0.00 | 0.00 | 0.41 | 0.09 | 8 | T Cell |
| <i>ARHGAP30</i> | 1.19 | 0.00 | 0.00 | 0.41 | 0.09 | 8 | T Cell |
| <i>CD48</i>     | 1.10 | 0.00 | 0.00 | 0.27 | 0.04 | 8 | T Cell |
| <i>WDR89</i>    | 1.00 | 0.00 | 0.00 | 0.97 | 0.82 | 8 | T Cell |
| <i>RPLP1</i>    | 0.92 | 0.00 | 0.00 | 0.99 | 0.90 | 8 | T Cell |
| <i>B2M</i>      | 0.78 | 0.00 | 0.00 | 0.97 | 0.69 | 8 | T Cell |
| <i>GIMAP6</i>   | 1.30 | 0.00 | 0.00 | 0.50 | 0.14 | 8 | T Cell |
| <i>PSMB8</i>    | 1.20 | 0.00 | 0.00 | 0.55 | 0.18 | 8 | T Cell |

|                 |      |      |      |      |      |   |        |
|-----------------|------|------|------|------|------|---|--------|
| <i>COTL1</i>    | 1.24 | 0.00 | 0.00 | 0.52 | 0.16 | 8 | T Cell |
| <i>APBB1IP</i>  | 1.11 | 0.00 | 0.00 | 0.37 | 0.08 | 8 | T Cell |
| <i>STK17B</i>   | 1.24 | 0.00 | 0.00 | 0.29 | 0.05 | 8 | T Cell |
| <i>SH3KBP1</i>  | 1.37 | 0.00 | 0.00 | 0.40 | 0.10 | 8 | T Cell |
| <i>TMSB10</i>   | 0.75 | 0.00 | 0.00 | 0.99 | 0.88 | 8 | T Cell |
| <i>TMSB4X</i>   | 0.63 | 0.00 | 0.00 | 1.00 | 0.90 | 8 | T Cell |
| <i>WAS</i>      | 1.07 | 0.00 | 0.00 | 0.27 | 0.05 | 8 | T Cell |
| <i>PDCD4</i>    | 1.40 | 0.00 | 0.00 | 0.55 | 0.20 | 8 | T Cell |
| <i>PYCARD</i>   | 1.25 | 0.00 | 0.00 | 0.37 | 0.08 | 8 | T Cell |
| <i>SEPT6</i>    | 1.22 | 0.00 | 0.00 | 0.33 | 0.07 | 8 | T Cell |
| <i>RPLP2</i>    | 0.77 | 0.00 | 0.00 | 0.96 | 0.82 | 8 | T Cell |
| <i>RPL18A</i>   | 0.80 | 0.00 | 0.00 | 0.97 | 0.83 | 8 | T Cell |
| <i>EEF1B2</i>   | 0.95 | 0.00 | 0.00 | 0.86 | 0.65 | 8 | T Cell |
| <i>RPS20</i>    | 0.80 | 0.00 | 0.00 | 0.93 | 0.80 | 8 | T Cell |
| <i>LRRC58</i>   | 0.75 | 0.00 | 0.00 | 0.96 | 0.85 | 8 | T Cell |
| <i>RPL8</i>     | 0.73 | 0.00 | 0.00 | 0.94 | 0.81 | 8 | T Cell |
| <i>TMEM71</i>   | 1.15 | 0.00 | 0.00 | 0.26 | 0.05 | 8 | T Cell |
| <i>LCP1</i>     | 1.02 | 0.00 | 0.00 | 0.54 | 0.20 | 8 | T Cell |
| <i>RPL10A</i>   | 0.73 | 0.00 | 0.00 | 0.90 | 0.76 | 8 | T Cell |
| <i>ARHGAP15</i> | 1.10 | 0.00 | 0.00 | 0.26 | 0.05 | 8 | T Cell |
| <i>CD37</i>     | 0.79 | 0.00 | 0.00 | 0.29 | 0.06 | 8 | T Cell |
| <i>ETS1</i>     | 1.15 | 0.00 | 0.00 | 0.56 | 0.23 | 8 | T Cell |
| <i>FAU</i>      | 0.62 | 0.00 | 0.00 | 0.96 | 0.87 | 8 | T Cell |
| <i>RPS4X</i>    | 0.59 | 0.00 | 0.00 | 0.97 | 0.88 | 8 | T Cell |
| <i>RPL6</i>     | 0.60 | 0.00 | 0.00 | 0.95 | 0.88 | 8 | T Cell |
| <i>GMFG</i>     | 1.05 | 0.00 | 0.00 | 0.42 | 0.14 | 8 | T Cell |
| <i>LSP1</i>     | 0.81 | 0.00 | 0.00 | 0.50 | 0.18 | 8 | T Cell |
| <i>EMB</i>      | 1.04 | 0.00 | 0.00 | 0.33 | 0.09 | 8 | T Cell |
| <i>JAK1</i>     | 1.15 | 0.00 | 0.00 | 0.54 | 0.25 | 8 | T Cell |
| <i>MBNL1</i>    | 1.11 | 0.00 | 0.00 | 0.53 | 0.25 | 8 | T Cell |
| <i>ACTR3</i>    | 0.97 | 0.00 | 0.00 | 0.60 | 0.32 | 8 | T Cell |
| <i>RAPGEF6</i>  | 1.20 | 0.00 | 0.00 | 0.35 | 0.11 | 8 | T Cell |
| <i>HCLS1</i>    | 0.87 | 0.00 | 0.00 | 0.27 | 0.07 | 8 | T Cell |
| <i>RPS13</i>    | 0.73 | 0.00 | 0.00 | 0.84 | 0.66 | 8 | T Cell |
| <i>GIMAP1</i>   | 0.95 | 0.00 | 0.00 | 0.37 | 0.13 | 8 | T Cell |
| <i>CRLF3</i>    | 1.14 | 0.00 | 0.00 | 0.35 | 0.12 | 8 | T Cell |
| <i>SH3BGR13</i> | 0.86 | 0.00 | 0.00 | 0.62 | 0.35 | 8 | T Cell |
| <i>DNAJC15</i>  | 1.06 | 0.00 | 0.00 | 0.27 | 0.08 | 8 | T Cell |
| <i>SRPK1</i>    | 1.05 | 0.00 | 0.00 | 0.32 | 0.11 | 8 | T Cell |
| <i>ARPC2</i>    | 0.67 | 0.00 | 0.00 | 0.80 | 0.61 | 8 | T Cell |
| <i>PFN1</i>     | 0.85 | 0.00 | 0.00 | 0.69 | 0.48 | 8 | T Cell |
| <i>RGS10</i>    | 1.05 | 0.00 | 0.00 | 0.28 | 0.09 | 8 | T Cell |
| <i>ATP1B3</i>   | 0.97 | 0.00 | 0.00 | 0.50 | 0.25 | 8 | T Cell |

|                  |      |      |      |      |      |   |        |
|------------------|------|------|------|------|------|---|--------|
| <i>ITGA4</i>     | 0.96 | 0.00 | 0.00 | 0.28 | 0.09 | 8 | T Cell |
| <i>LEPROTL1</i>  | 0.99 | 0.00 | 0.00 | 0.36 | 0.15 | 8 | T Cell |
| <i>ABLIM1</i>    | 0.93 | 0.00 | 0.00 | 0.46 | 0.23 | 8 | T Cell |
| <i>ORC5</i>      | 0.74 | 0.00 | 0.00 | 0.70 | 0.51 | 8 | T Cell |
| <i>RPL23A</i>    | 0.53 | 0.00 | 0.00 | 0.84 | 0.69 | 8 | T Cell |
| <i>FKBP3</i>     | 0.97 | 0.00 | 0.00 | 0.51 | 0.28 | 8 | T Cell |
| <i>PSMB9</i>     | 0.85 | 0.00 | 0.00 | 0.27 | 0.09 | 8 | T Cell |
| <i>RPL7</i>      | 0.47 | 0.00 | 0.00 | 0.88 | 0.77 | 8 | T Cell |
| <i>RPL22L1</i>   | 0.70 | 0.00 | 0.00 | 0.70 | 0.53 | 8 | T Cell |
| <i>CDK2AP2</i>   | 0.86 | 0.00 | 0.00 | 0.34 | 0.14 | 8 | T Cell |
| <i>SERBP1</i>    | 0.58 | 0.00 | 0.00 | 0.82 | 0.73 | 8 | T Cell |
| <i>RPL13A</i>    | 0.40 | 0.00 | 0.00 | 0.77 | 0.58 | 8 | T Cell |
| <i>SRGN</i>      | 0.57 | 0.00 | 0.00 | 0.59 | 0.31 | 8 | T Cell |
| <i>S100A10</i>   | 0.81 | 0.00 | 0.00 | 0.60 | 0.40 | 8 | T Cell |
| <i>HMGB2</i>     | 0.96 | 0.00 | 0.00 | 0.56 | 0.38 | 8 | T Cell |
| <i>ARHGEF1</i>   | 0.90 | 0.00 | 0.00 | 0.28 | 0.11 | 8 | T Cell |
| <i>RPS27A</i>    | 0.42 | 0.00 | 0.00 | 0.87 | 0.78 | 8 | T Cell |
| <i>ARPC1B</i>    | 0.63 | 0.00 | 0.00 | 0.56 | 0.36 | 8 | T Cell |
| <i>DNAJC9</i>    | 0.82 | 0.00 | 0.00 | 0.25 | 0.10 | 8 | T Cell |
| <i>BZW2</i>      | 0.91 | 0.00 | 0.00 | 0.30 | 0.14 | 8 | T Cell |
| <i>HNRNPA2B1</i> | 0.45 | 0.00 | 0.00 | 0.81 | 0.72 | 8 | T Cell |
| <i>STK4</i>      | 0.87 | 0.00 | 0.00 | 0.30 | 0.13 | 8 | T Cell |
| <i>RPL36A</i>    | 0.54 | 0.00 | 0.00 | 0.75 | 0.64 | 8 | T Cell |
| <i>MT-ND5</i>    | 0.46 | 0.00 | 0.00 | 0.83 | 0.75 | 8 | T Cell |
| <i>TPM3</i>      | 0.45 | 0.00 | 0.00 | 0.78 | 0.67 | 8 | T Cell |
| <i>ANP32A</i>    | 0.48 | 0.00 | 0.00 | 0.72 | 0.57 | 8 | T Cell |
| <i>RPL37A</i>    | 0.36 | 0.00 | 0.00 | 0.91 | 0.85 | 8 | T Cell |
| <i>EEF1G</i>     | 0.64 | 0.00 | 0.00 | 0.60 | 0.46 | 8 | T Cell |
| <i>MT-ATP6</i>   | 0.35 | 0.00 | 0.00 | 0.90 | 0.85 | 8 | T Cell |
| <i>CCND2</i>     | 0.71 | 0.00 | 0.00 | 0.45 | 0.27 | 8 | T Cell |
| <i>LDHA</i>      | 0.70 | 0.00 | 0.00 | 0.47 | 0.31 | 8 | T Cell |
| <i>MT-ND1</i>    | 0.31 | 0.00 | 0.00 | 0.95 | 0.92 | 8 | T Cell |
| <i>SAMHD1</i>    | 0.70 | 0.00 | 0.00 | 0.36 | 0.19 | 8 | T Cell |
| <i>NT5C</i>      | 0.74 | 0.00 | 0.00 | 0.32 | 0.16 | 8 | T Cell |
| <i>ARPC5</i>     | 0.53 | 0.00 | 0.00 | 0.67 | 0.57 | 8 | T Cell |
| <i>SF3B1</i>     | 0.65 | 0.00 | 0.00 | 0.59 | 0.44 | 8 | T Cell |
| <i>CRIP1</i>     | 0.42 | 0.00 | 0.00 | 0.65 | 0.47 | 8 | T Cell |
| <i>CD47</i>      | 0.61 | 0.00 | 0.00 | 0.57 | 0.41 | 8 | T Cell |
| <i>PSME1</i>     | 0.65 | 0.00 | 0.00 | 0.49 | 0.33 | 8 | T Cell |
| <i>NACA</i>      | 0.46 | 0.00 | 0.00 | 0.71 | 0.61 | 8 | T Cell |
| <i>HNRNPF</i>    | 0.64 | 0.00 | 0.00 | 0.49 | 0.34 | 8 | T Cell |
| <i>RAB8A</i>     | 0.69 | 0.00 | 0.00 | 0.27 | 0.13 | 8 | T Cell |
| <i>SEC11C</i>    | 0.62 | 0.00 | 0.00 | 0.31 | 0.16 | 8 | T Cell |

|                 |      |      |      |      |      |   |        |
|-----------------|------|------|------|------|------|---|--------|
| <i>ABRACL</i>   | 0.67 | 0.00 | 0.00 | 0.37 | 0.22 | 8 | T Cell |
| <i>KLF2</i>     | 0.64 | 0.00 | 0.00 | 0.35 | 0.19 | 8 | T Cell |
| <i>ARL6IP1</i>  | 0.57 | 0.00 | 0.00 | 0.62 | 0.49 | 8 | T Cell |
| <i>STK38</i>    | 0.77 | 0.00 | 0.00 | 0.32 | 0.18 | 8 | T Cell |
| <i>DDX5</i>     | 0.44 | 0.00 | 0.00 | 0.78 | 0.71 | 8 | T Cell |
| <i>OAZ1</i>     | 0.44 | 0.00 | 0.00 | 0.70 | 0.63 | 8 | T Cell |
| <i>PSME2</i>    | 0.61 | 0.00 | 0.00 | 0.40 | 0.25 | 8 | T Cell |
| <i>CFL1</i>     | 0.47 | 0.00 | 0.00 | 0.70 | 0.60 | 8 | T Cell |
| <i>EMG1</i>     | 0.67 | 0.00 | 0.00 | 0.28 | 0.14 | 8 | T Cell |
| <i>ENO1</i>     | 0.60 | 0.00 | 0.00 | 0.32 | 0.18 | 8 | T Cell |
| <i>XRN2</i>     | 0.71 | 0.00 | 0.00 | 0.43 | 0.29 | 8 | T Cell |
| <i>HSPA8</i>    | 0.40 | 0.00 | 0.00 | 0.73 | 0.68 | 8 | T Cell |
| <i>SNRPF</i>    | 0.62 | 0.00 | 0.00 | 0.42 | 0.28 | 8 | T Cell |
| <i>NME1</i>     | 0.63 | 0.00 | 0.00 | 0.32 | 0.19 | 8 | T Cell |
| <i>MT-CO3</i>   | 0.25 | 0.00 | 0.00 | 0.92 | 0.89 | 8 | T Cell |
| <i>CDC42SE1</i> | 0.67 | 0.00 | 0.00 | 0.32 | 0.18 | 8 | T Cell |
| <i>TSC22D4</i>  | 0.60 | 0.00 | 0.00 | 0.40 | 0.25 | 8 | T Cell |
| <i>EIF3E</i>    | 0.52 | 0.00 | 0.00 | 0.55 | 0.43 | 8 | T Cell |
| <i>EIF3H</i>    | 0.59 | 0.00 | 0.00 | 0.48 | 0.37 | 8 | T Cell |
| <i>RNASET2</i>  | 0.59 | 0.00 | 0.00 | 0.38 | 0.25 | 8 | T Cell |
| <i>SLC25A5</i>  | 0.44 | 0.00 | 0.00 | 0.65 | 0.58 | 8 | T Cell |
| <i>SNRPD3</i>   | 0.60 | 0.00 | 0.00 | 0.43 | 0.31 | 8 | T Cell |
| <i>NOP10</i>    | 0.61 | 0.00 | 0.00 | 0.41 | 0.29 | 8 | T Cell |
| <i>SMCHD1</i>   | 0.66 | 0.00 | 0.00 | 0.26 | 0.14 | 8 | T Cell |
| <i>RBM3</i>     | 0.53 | 0.00 | 0.00 | 0.51 | 0.41 | 8 | T Cell |
| <i>FGFR10P2</i> | 0.60 | 0.00 | 0.00 | 0.38 | 0.26 | 8 | T Cell |
| <i>NOP58</i>    | 0.60 | 0.00 | 0.00 | 0.36 | 0.24 | 8 | T Cell |
| <i>EEF2</i>     | 0.41 | 0.00 | 0.00 | 0.67 | 0.59 | 8 | T Cell |
| <i>HSP90AB1</i> | 0.28 | 0.00 | 0.00 | 0.89 | 0.89 | 8 | T Cell |
| <i>EMP3</i>     | 0.49 | 0.00 | 0.00 | 0.37 | 0.24 | 8 | T Cell |
| <i>AKAP13</i>   | 0.59 | 0.00 | 0.00 | 0.38 | 0.26 | 8 | T Cell |
| <i>ADD3</i>     | 0.54 | 0.00 | 0.00 | 0.40 | 0.27 | 8 | T Cell |
| <i>TP53</i>     | 0.59 | 0.00 | 0.00 | 0.26 | 0.15 | 8 | T Cell |
| <i>H2AFZ</i>    | 0.63 | 0.00 | 0.00 | 0.49 | 0.41 | 8 | T Cell |
| <i>DUSP11</i>   | 0.59 | 0.00 | 0.00 | 0.36 | 0.24 | 8 | T Cell |
| <i>EZR</i>      | 0.48 | 0.00 | 0.00 | 0.33 | 0.21 | 8 | T Cell |
| <i>SRRM2</i>    | 0.41 | 0.00 | 0.00 | 0.65 | 0.59 | 8 | T Cell |
| <i>PPP1CA</i>   | 0.52 | 0.00 | 0.00 | 0.44 | 0.33 | 8 | T Cell |
| <i>DDX21</i>    | 0.61 | 0.00 | 0.00 | 0.37 | 0.26 | 8 | T Cell |
| <i>CNN2</i>     | 0.41 | 0.00 | 0.00 | 0.51 | 0.38 | 8 | T Cell |
| <i>EIF3M</i>    | 0.54 | 0.00 | 0.00 | 0.36 | 0.25 | 8 | T Cell |
| <i>HNRNPCL1</i> | 0.46 | 0.00 | 0.00 | 0.50 | 0.40 | 8 | T Cell |
| <i>NOP56</i>    | 0.60 | 0.00 | 0.00 | 0.30 | 0.19 | 8 | T Cell |

|                       |      |      |      |      |      |   |        |
|-----------------------|------|------|------|------|------|---|--------|
| <i>HNRNPU</i>         | 0.37 | 0.00 | 0.00 | 0.68 | 0.62 | 8 | T Cell |
| <i>IFNGR1</i>         | 0.62 | 0.00 | 0.00 | 0.34 | 0.23 | 8 | T Cell |
| <i>RPL17-C18orf32</i> | 0.58 | 0.00 | 0.00 | 0.41 | 0.30 | 8 | T Cell |
| <i>LSM4</i>           | 0.56 | 0.00 | 0.00 | 0.31 | 0.20 | 8 | T Cell |
| <i>SUPT4H1</i>        | 0.57 | 0.00 | 0.00 | 0.27 | 0.17 | 8 | T Cell |
| <i>MDH1</i>           | 0.54 | 0.00 | 0.00 | 0.29 | 0.18 | 8 | T Cell |
| <i>CDKN1B</i>         | 0.65 | 0.00 | 0.00 | 0.29 | 0.19 | 8 | T Cell |
| <i>ANP32E</i>         | 0.55 | 0.00 | 0.00 | 0.36 | 0.26 | 8 | T Cell |
| <i>MSN</i>            | 0.40 | 0.00 | 0.00 | 0.55 | 0.44 | 8 | T Cell |
| <i>PCNA</i>           | 0.63 | 0.00 | 0.00 | 0.26 | 0.16 | 8 | T Cell |
| <i>G3BP2</i>          | 0.46 | 0.00 | 0.00 | 0.39 | 0.29 | 8 | T Cell |
| <i>THRAP3</i>         | 0.52 | 0.00 | 0.00 | 0.44 | 0.36 | 8 | T Cell |
| <i>COX7A2L</i>        | 0.47 | 0.00 | 0.00 | 0.50 | 0.42 | 8 | T Cell |
| <i>HSPE1</i>          | 0.54 | 0.00 | 0.00 | 0.39 | 0.30 | 8 | T Cell |
| <i>PRRC2C</i>         | 0.36 | 0.00 | 0.00 | 0.66 | 0.61 | 8 | T Cell |
| <i>POLR1D</i>         | 0.51 | 0.00 | 0.00 | 0.37 | 0.28 | 8 | T Cell |
| <i>ACIN1</i>          | 0.41 | 0.00 | 0.00 | 0.59 | 0.51 | 8 | T Cell |
| <i>MIF</i>            | 0.48 | 0.00 | 0.00 | 0.33 | 0.23 | 8 | T Cell |
| <i>PPP2R5C</i>        | 0.50 | 0.00 | 0.00 | 0.29 | 0.19 | 8 | T Cell |
| <i>RAN</i>            | 0.46 | 0.00 | 0.00 | 0.46 | 0.39 | 8 | T Cell |
| <i>NCOR1</i>          | 0.47 | 0.00 | 0.00 | 0.47 | 0.40 | 8 | T Cell |
| <i>DNAJC2</i>         | 0.52 | 0.00 | 0.00 | 0.27 | 0.19 | 8 | T Cell |
| <i>LRRFIP1</i>        | 0.47 | 0.00 | 0.00 | 0.35 | 0.25 | 8 | T Cell |
| <i>ANP32B</i>         | 0.41 | 0.00 | 0.00 | 0.53 | 0.48 | 8 | T Cell |
| <i>PKM</i>            | 0.50 | 0.00 | 0.00 | 0.33 | 0.24 | 8 | T Cell |
| <i>PSMB1</i>          | 0.40 | 0.00 | 0.00 | 0.53 | 0.48 | 8 | T Cell |
| <i>GCLM</i>           | 0.41 | 0.00 | 0.00 | 0.46 | 0.38 | 8 | T Cell |
| <i>DDX46</i>          | 0.46 | 0.00 | 0.00 | 0.38 | 0.30 | 8 | T Cell |
| <i>LLPH</i>           | 0.40 | 0.00 | 0.00 | 0.41 | 0.31 | 8 | T Cell |
| <i>TSPO</i>           | 0.45 | 0.00 | 0.00 | 0.35 | 0.27 | 8 | T Cell |
| <i>EIF3I</i>          | 0.46 | 0.00 | 0.00 | 0.33 | 0.24 | 8 | T Cell |
| <i>ACTR2</i>          | 0.41 | 0.00 | 0.00 | 0.36 | 0.27 | 8 | T Cell |
| <i>PAK2</i>           | 0.45 | 0.00 | 0.00 | 0.36 | 0.28 | 8 | T Cell |
| <i>UQCRH</i>          | 0.37 | 0.00 | 0.00 | 0.54 | 0.48 | 8 | T Cell |
| <i>EIF3K</i>          | 0.44 | 0.00 | 0.00 | 0.43 | 0.36 | 8 | T Cell |
| <i>MYH9</i>           | 0.40 | 0.00 | 0.00 | 0.42 | 0.34 | 8 | T Cell |
| <i>SNRPE</i>          | 0.39 | 0.00 | 0.00 | 0.44 | 0.37 | 8 | T Cell |
| <i>PSMD14</i>         | 0.45 | 0.00 | 0.00 | 0.25 | 0.17 | 8 | T Cell |
| <i>RSL1D1</i>         | 0.49 | 0.00 | 0.00 | 0.35 | 0.27 | 8 | T Cell |
| <i>EIF5A</i>          | 0.39 | 0.00 | 0.00 | 0.41 | 0.33 | 8 | T Cell |
| <i>TOP2B</i>          | 0.47 | 0.00 | 0.00 | 0.33 | 0.25 | 8 | T Cell |
| <i>BTF3</i>           | 0.31 | 0.00 | 0.00 | 0.59 | 0.54 | 8 | T Cell |
| <i>NOL7</i>           | 0.37 | 0.00 | 0.00 | 0.43 | 0.35 | 8 | T Cell |

|                |      |      |      |      |      |   |        |
|----------------|------|------|------|------|------|---|--------|
| <i>EIF3F</i>   | 0.43 | 0.00 | 0.00 | 0.44 | 0.38 | 8 | T Cell |
| <i>HNRNPM</i>  | 0.34 | 0.00 | 0.00 | 0.53 | 0.49 | 8 | T Cell |
| <i>CNBP</i>    | 0.38 | 0.00 | 0.00 | 0.51 | 0.47 | 8 | T Cell |
| <i>EIF3CL</i>  | 0.34 | 0.00 | 0.00 | 0.49 | 0.43 | 8 | T Cell |
| <i>OSTF1</i>   | 0.39 | 0.00 | 0.00 | 0.33 | 0.25 | 8 | T Cell |
| <i>CCT2</i>    | 0.45 | 0.00 | 0.00 | 0.33 | 0.26 | 8 | T Cell |
| <i>TMEM50A</i> | 0.37 | 0.00 | 0.00 | 0.50 | 0.44 | 8 | T Cell |
| <i>SUB1</i>    | 0.29 | 0.00 | 0.00 | 0.56 | 0.52 | 8 | T Cell |
| <i>RSBN1L</i>  | 0.50 | 0.00 | 0.00 | 0.31 | 0.24 | 8 | T Cell |
| <i>PNN</i>     | 0.31 | 0.00 | 0.00 | 0.56 | 0.51 | 8 | T Cell |
| <i>ITSN2</i>   | 0.42 | 0.00 | 0.00 | 0.31 | 0.23 | 8 | T Cell |
| <i>PTBP3</i>   | 0.36 | 0.00 | 0.00 | 0.40 | 0.33 | 8 | T Cell |
| <i>S1PR1</i>   | 0.36 | 0.00 | 0.00 | 0.26 | 0.19 | 8 | T Cell |
| <i>SF3B2</i>   | 0.36 | 0.00 | 0.00 | 0.44 | 0.38 | 8 | T Cell |
| <i>H2AFY</i>   | 0.47 | 0.00 | 0.00 | 0.27 | 0.20 | 8 | T Cell |
| <i>NAP1L4</i>  | 0.44 | 0.00 | 0.00 | 0.32 | 0.25 | 8 | T Cell |
| <i>CCT8</i>    | 0.41 | 0.00 | 0.00 | 0.28 | 0.21 | 8 | T Cell |
| <i>KHDRBS1</i> | 0.39 | 0.00 | 0.00 | 0.37 | 0.31 | 8 | T Cell |
| <i>MRPL18</i>  | 0.38 | 0.00 | 0.00 | 0.26 | 0.20 | 8 | T Cell |
| <i>CAPZB</i>   | 0.32 | 0.00 | 0.00 | 0.48 | 0.44 | 8 | T Cell |
| <i>RRP1</i>    | 0.39 | 0.00 | 0.00 | 0.40 | 0.34 | 8 | T Cell |
| <i>SSRP1</i>   | 0.40 | 0.00 | 0.00 | 0.26 | 0.20 | 8 | T Cell |
| <i>PA2G4</i>   | 0.42 | 0.00 | 0.00 | 0.32 | 0.26 | 8 | T Cell |
| <i>CELF2</i>   | 0.30 | 0.00 | 0.00 | 0.34 | 0.27 | 8 | T Cell |
| <i>PTP4A2</i>  | 0.39 | 0.00 | 0.00 | 0.46 | 0.41 | 8 | T Cell |
| <i>BANF1</i>   | 0.37 | 0.00 | 0.00 | 0.35 | 0.29 | 8 | T Cell |
| <i>NASP</i>    | 0.40 | 0.00 | 0.00 | 0.25 | 0.19 | 8 | T Cell |
| <i>VASP</i>    | 0.42 | 0.00 | 0.00 | 0.26 | 0.20 | 8 | T Cell |
| <i>CTSD</i>    | 0.30 | 0.00 | 0.00 | 0.31 | 0.25 | 8 | T Cell |
| <i>UQCRC2</i>  | 0.40 | 0.00 | 0.00 | 0.28 | 0.22 | 8 | T Cell |
| <i>MYCBP2</i>  | 0.39 | 0.00 | 0.00 | 0.28 | 0.22 | 8 | T Cell |
| <i>YWHAZ</i>   | 0.26 | 0.00 | 0.00 | 0.53 | 0.50 | 8 | T Cell |
| <i>TMA7</i>    | 0.33 | 0.00 | 0.00 | 0.40 | 0.35 | 8 | T Cell |
| <i>NDUFV3</i>  | 0.36 | 0.00 | 0.00 | 0.29 | 0.23 | 8 | T Cell |
| <i>SPCS2</i>   | 0.35 | 0.00 | 0.00 | 0.38 | 0.33 | 8 | T Cell |
| <i>TRA2B</i>   | 0.38 | 0.00 | 0.00 | 0.35 | 0.30 | 8 | T Cell |
| <i>BTG1</i>    | 0.42 | 0.00 | 0.00 | 0.35 | 0.31 | 8 | T Cell |
| <i>SUPT16H</i> | 0.37 | 0.00 | 0.00 | 0.28 | 0.23 | 8 | T Cell |
| <i>PRELID1</i> | 0.34 | 0.00 | 0.00 | 0.35 | 0.30 | 8 | T Cell |
| <i>DNAJA2</i>  | 0.38 | 0.00 | 0.00 | 0.29 | 0.24 | 8 | T Cell |
| <i>TOMM20</i>  | 0.35 | 0.00 | 0.00 | 0.31 | 0.26 | 8 | T Cell |
| <i>CCT4</i>    | 0.39 | 0.00 | 0.00 | 0.27 | 0.22 | 8 | T Cell |
| <i>ATP6V1F</i> | 0.35 | 0.00 | 0.00 | 0.31 | 0.26 | 8 | T Cell |

|                |      |      |      |      |      |   |             |
|----------------|------|------|------|------|------|---|-------------|
| <i>TMEM234</i> | 0.34 | 0.00 | 0.00 | 0.37 | 0.33 | 8 | T Cell      |
| <i>HSPD1</i>   | 0.39 | 0.00 | 0.00 | 0.31 | 0.26 | 8 | T Cell      |
| <i>CCNL1</i>   | 0.32 | 0.00 | 0.00 | 0.37 | 0.32 | 8 | T Cell      |
| <i>CSNK2A3</i> | 0.35 | 0.00 | 0.00 | 0.33 | 0.28 | 8 | T Cell      |
| <i>NSA2</i>    | 0.31 | 0.00 | 0.00 | 0.35 | 0.30 | 8 | T Cell      |
| <i>CDC37</i>   | 0.33 | 0.00 | 0.00 | 0.34 | 0.29 | 8 | T Cell      |
| <i>PHF20L1</i> | 0.36 | 0.00 | 0.00 | 0.31 | 0.26 | 8 | T Cell      |
| <i>CTCF</i>    | 0.33 | 0.00 | 0.00 | 0.26 | 0.21 | 8 | T Cell      |
| <i>SRI</i>     | 0.35 | 0.00 | 0.00 | 0.32 | 0.28 | 8 | T Cell      |
| <i>MT-ATP8</i> | 0.35 | 0.00 | 0.00 | 0.30 | 0.25 | 8 | T Cell      |
| <i>BZW1</i>    | 0.29 | 0.00 | 0.00 | 0.37 | 0.33 | 8 | T Cell      |
| <i>CCT5</i>    | 0.29 | 0.00 | 0.00 | 0.28 | 0.23 | 8 | T Cell      |
| <i>SLTM</i>    | 0.29 | 0.00 | 0.01 | 0.42 | 0.39 | 8 | T Cell      |
| <i>VPS28</i>   | 0.34 | 0.00 | 0.01 | 0.25 | 0.21 | 8 | T Cell      |
| <i>NONO</i>    | 0.34 | 0.00 | 0.01 | 0.26 | 0.22 | 8 | T Cell      |
| <i>MIER1</i>   | 0.35 | 0.00 | 0.02 | 0.27 | 0.22 | 8 | T Cell      |
| <i>ITGAM</i>   | 0.26 | 0.00 | 0.02 | 0.30 | 0.25 | 8 | T Cell      |
| <i>SRSF5</i>   | 0.27 | 0.00 | 0.03 | 0.51 | 0.51 | 8 | T Cell      |
| <i>CDC5L</i>   | 0.32 | 0.00 | 0.04 | 0.25 | 0.21 | 8 | T Cell      |
| <i>FBLN2</i>   | 2.47 | 0.00 | 0.00 | 0.61 | 0.05 | 9 | Endothelial |
| <i>VWF</i>     | 2.41 | 0.00 | 0.00 | 0.64 | 0.02 | 9 | Endothelial |
| <i>PTPRB</i>   | 2.07 | 0.00 | 0.00 | 0.90 | 0.19 | 9 | Endothelial |
| <i>FBLN5</i>   | 1.97 | 0.00 | 0.00 | 0.66 | 0.17 | 9 | Endothelial |
| <i>TM4SF1</i>  | 1.72 | 0.00 | 0.00 | 0.80 | 0.21 | 9 | Endothelial |
| <i>EDN1</i>    | 1.53 | 0.00 | 0.00 | 0.53 | 0.09 | 9 | Endothelial |
| <i>STMN2</i>   | 1.49 | 0.00 | 0.00 | 0.58 | 0.13 | 9 | Endothelial |
| <i>GJA4</i>    | 1.48 | 0.00 | 0.00 | 0.40 | 0.07 | 9 | Endothelial |
| <i>PRSS23</i>  | 1.44 | 0.00 | 0.00 | 0.41 | 0.07 | 9 | Endothelial |
| <i>CPE</i>     | 1.40 | 0.00 | 0.00 | 0.27 | 0.03 | 9 | Endothelial |
| <i>ACKR3</i>   | 1.39 | 0.00 | 0.00 | 0.33 | 0.04 | 9 | Endothelial |
| <i>HEG1</i>    | 1.39 | 0.00 | 0.00 | 0.63 | 0.15 | 9 | Endothelial |
| <i>JAM2</i>    | 1.35 | 0.00 | 0.00 | 0.42 | 0.06 | 9 | Endothelial |
| <i>PLVAP</i>   | 1.35 | 0.00 | 0.00 | 0.53 | 0.11 | 9 | Endothelial |
| <i>CLEC14A</i> | 1.30 | 0.00 | 0.00 | 0.71 | 0.17 | 9 | Endothelial |
| <i>CALCRL</i>  | 1.28 | 0.00 | 0.00 | 0.85 | 0.24 | 9 | Endothelial |
| <i>TEK</i>     | 1.27 | 0.00 | 0.00 | 0.56 | 0.11 | 9 | Endothelial |
| <i>LYVE1</i>   | 1.24 | 0.00 | 0.00 | 0.70 | 0.20 | 9 | Endothelial |
| <i>MMRN2</i>   | 1.23 | 0.00 | 0.00 | 0.36 | 0.04 | 9 | Endothelial |
| <i>FLT1</i>    | 1.19 | 0.00 | 0.00 | 0.58 | 0.14 | 9 | Endothelial |
| <i>PECAM1</i>  | 1.14 | 0.00 | 0.00 | 0.79 | 0.24 | 9 | Endothelial |
| <i>CD93</i>    | 1.05 | 0.00 | 0.00 | 0.73 | 0.21 | 9 | Endothelial |
| <i>RAMP2</i>   | 1.03 | 0.00 | 0.00 | 0.84 | 0.28 | 9 | Endothelial |
| <i>EGFL7</i>   | 0.93 | 0.00 | 0.00 | 0.85 | 0.27 | 9 | Endothelial |

|                 |      |      |      |      |      |   |             |
|-----------------|------|------|------|------|------|---|-------------|
| <i>CXCL12</i>   | 2.52 | 0.00 | 0.00 | 0.49 | 0.12 | 9 | Endothelial |
| <i>APLNR</i>    | 1.26 | 0.00 | 0.00 | 0.37 | 0.07 | 9 | Endothelial |
| <i>PALMD</i>    | 1.10 | 0.00 | 0.00 | 0.50 | 0.12 | 9 | Endothelial |
| <i>ADAM15</i>   | 1.04 | 0.00 | 0.00 | 0.39 | 0.08 | 9 | Endothelial |
| <i>ADCY4</i>    | 1.06 | 0.00 | 0.00 | 0.39 | 0.08 | 9 | Endothelial |
| <i>TSPAN7</i>   | 0.92 | 0.00 | 0.00 | 0.66 | 0.20 | 9 | Endothelial |
| <i>CLDN5</i>    | 0.87 | 0.00 | 0.00 | 0.69 | 0.23 | 9 | Endothelial |
| <i>EFNB2</i>    | 1.32 | 0.00 | 0.00 | 0.49 | 0.14 | 9 | Endothelial |
| <i>S100A16</i>  | 0.93 | 0.00 | 0.00 | 0.68 | 0.24 | 9 | Endothelial |
| <i>AQP1</i>     | 1.05 | 0.00 | 0.00 | 0.60 | 0.20 | 9 | Endothelial |
| <i>CDH5</i>     | 0.73 | 0.00 | 0.00 | 0.70 | 0.23 | 9 | Endothelial |
| <i>SEMA3G</i>   | 1.20 | 0.00 | 0.00 | 0.32 | 0.06 | 9 | Endothelial |
| <i>LTBP4</i>    | 1.12 | 0.00 | 0.00 | 0.42 | 0.11 | 9 | Endothelial |
| <i>ECE1</i>     | 1.01 | 0.00 | 0.00 | 0.63 | 0.24 | 9 | Endothelial |
| <i>SRGN</i>     | 0.87 | 0.00 | 0.00 | 0.74 | 0.31 | 9 | Endothelial |
| <i>TIE1</i>     | 0.90 | 0.00 | 0.00 | 0.42 | 0.11 | 9 | Endothelial |
| <i>HYAL2</i>    | 1.06 | 0.00 | 0.00 | 0.35 | 0.09 | 9 | Endothelial |
| <i>SHE</i>      | 0.85 | 0.00 | 0.00 | 0.27 | 0.05 | 9 | Endothelial |
| <i>CD9</i>      | 0.86 | 0.00 | 0.00 | 0.73 | 0.35 | 9 | Endothelial |
| <i>CD200</i>    | 0.88 | 0.00 | 0.00 | 0.62 | 0.26 | 9 | Endothelial |
| <i>SOX18</i>    | 0.79 | 0.00 | 0.00 | 0.25 | 0.05 | 9 | Endothelial |
| <i>EPAS1</i>    | 0.76 | 0.00 | 0.00 | 0.67 | 0.27 | 9 | Endothelial |
| <i>ENTPD1</i>   | 0.94 | 0.00 | 0.00 | 0.33 | 0.08 | 9 | Endothelial |
| <i>EHD4</i>     | 0.84 | 0.00 | 0.00 | 0.62 | 0.26 | 9 | Endothelial |
| <i>IGF2</i>     | 1.38 | 0.00 | 0.00 | 0.27 | 0.06 | 9 | Endothelial |
| <i>MEIS2</i>    | 0.85 | 0.00 | 0.00 | 0.38 | 0.11 | 9 | Endothelial |
| <i>MYCT1</i>    | 0.78 | 0.00 | 0.00 | 0.41 | 0.12 | 9 | Endothelial |
| <i>FSTL1</i>    | 0.77 | 0.00 | 0.00 | 0.79 | 0.45 | 9 | Endothelial |
| <i>SOX17</i>    | 0.92 | 0.00 | 0.00 | 0.42 | 0.13 | 9 | Endothelial |
| <i>EPHB4</i>    | 0.81 | 0.00 | 0.00 | 0.30 | 0.07 | 9 | Endothelial |
| <i>ECSCR</i>    | 0.70 | 0.00 | 0.00 | 0.46 | 0.15 | 9 | Endothelial |
| <i>ICAM2</i>    | 0.73 | 0.00 | 0.00 | 0.48 | 0.17 | 9 | Endothelial |
| <i>PLK2</i>     | 0.99 | 0.00 | 0.00 | 0.45 | 0.16 | 9 | Endothelial |
| <i>CAV1</i>     | 0.74 | 0.00 | 0.00 | 0.74 | 0.36 | 9 | Endothelial |
| <i>ACER2</i>    | 0.92 | 0.00 | 0.00 | 0.32 | 0.09 | 9 | Endothelial |
| <i>RASIP1</i>   | 0.77 | 0.00 | 0.00 | 0.38 | 0.12 | 9 | Endothelial |
| <i>PODXL</i>    | 0.79 | 0.00 | 0.00 | 0.36 | 0.10 | 9 | Endothelial |
| <i>TMEM88</i>   | 0.83 | 0.00 | 0.00 | 0.35 | 0.10 | 9 | Endothelial |
| <i>SLC43A3</i>  | 0.89 | 0.00 | 0.00 | 0.49 | 0.18 | 9 | Endothelial |
| <i>TGM2</i>     | 0.83 | 0.00 | 0.00 | 0.34 | 0.10 | 9 | Endothelial |
| <i>PCSK5</i>    | 1.04 | 0.00 | 0.00 | 0.31 | 0.09 | 9 | Endothelial |
| <i>SLC9A3R2</i> | 0.90 | 0.00 | 0.00 | 0.54 | 0.22 | 9 | Endothelial |
| <i>CYYR1</i>    | 0.73 | 0.00 | 0.00 | 0.42 | 0.14 | 9 | Endothelial |

|                 |      |      |      |      |      |   |             |
|-----------------|------|------|------|------|------|---|-------------|
| <i>ESAM</i>     | 0.65 | 0.00 | 0.00 | 0.51 | 0.20 | 9 | Endothelial |
| <i>RNF144A</i>  | 0.88 | 0.00 | 0.00 | 0.40 | 0.14 | 9 | Endothelial |
| <i>GATA2</i>    | 0.69 | 0.00 | 0.00 | 0.40 | 0.13 | 9 | Endothelial |
| <i>CSRP2</i>    | 0.89 | 0.00 | 0.00 | 0.41 | 0.15 | 9 | Endothelial |
| <i>ACVRL1</i>   | 0.68 | 0.00 | 0.00 | 0.47 | 0.18 | 9 | Endothelial |
| <i>TNFSF10</i>  | 0.74 | 0.00 | 0.00 | 0.32 | 0.10 | 9 | Endothelial |
| <i>NOTCH1</i>   | 0.79 | 0.00 | 0.00 | 0.36 | 0.12 | 9 | Endothelial |
| <i>LDB2</i>     | 0.76 | 0.00 | 0.00 | 0.44 | 0.17 | 9 | Endothelial |
| <i>PLXND1</i>   | 0.77 | 0.00 | 0.00 | 0.27 | 0.08 | 9 | Endothelial |
| <i>RHOJ</i>     | 0.73 | 0.00 | 0.00 | 0.44 | 0.17 | 9 | Endothelial |
| <i>RIPPLY3</i>  | 0.97 | 0.00 | 0.00 | 0.34 | 0.11 | 9 | Endothelial |
| <i>PRCP</i>     | 0.77 | 0.00 | 0.00 | 0.32 | 0.10 | 9 | Endothelial |
| <i>FOXO1</i>    | 0.74 | 0.00 | 0.00 | 0.25 | 0.07 | 9 | Endothelial |
| <i>IGFBP4</i>   | 0.90 | 0.00 | 0.00 | 0.56 | 0.27 | 9 | Endothelial |
| <i>FKBP1A</i>   | 0.69 | 0.00 | 0.00 | 0.72 | 0.43 | 9 | Endothelial |
| <i>HOXA5</i>    | 0.77 | 0.00 | 0.00 | 0.37 | 0.13 | 9 | Endothelial |
| <i>SLC6A6</i>   | 0.97 | 0.00 | 0.00 | 0.50 | 0.23 | 9 | Endothelial |
| <i>KLF2</i>     | 0.72 | 0.00 | 0.00 | 0.47 | 0.19 | 9 | Endothelial |
| <i>GATA6</i>    | 0.84 | 0.00 | 0.00 | 0.26 | 0.08 | 9 | Endothelial |
| <i>CAV2</i>     | 0.62 | 0.00 | 0.00 | 0.50 | 0.22 | 9 | Endothelial |
| <i>COL5A2</i>   | 1.01 | 0.00 | 0.00 | 0.42 | 0.18 | 9 | Endothelial |
| <i>EMCN</i>     | 0.58 | 0.00 | 0.00 | 0.34 | 0.11 | 9 | Endothelial |
| <i>CRIM1</i>    | 0.77 | 0.00 | 0.00 | 0.26 | 0.08 | 9 | Endothelial |
| <i>ELK3</i>     | 0.70 | 0.00 | 0.00 | 0.37 | 0.14 | 9 | Endothelial |
| <i>RAB11A</i>   | 0.70 | 0.00 | 0.00 | 0.55 | 0.27 | 9 | Endothelial |
| <i>SMAD7</i>    | 0.77 | 0.00 | 0.00 | 0.31 | 0.11 | 9 | Endothelial |
| <i>TMEM100</i>  | 0.62 | 0.00 | 0.00 | 0.60 | 0.29 | 9 | Endothelial |
| <i>ENG</i>      | 0.77 | 0.00 | 0.00 | 0.35 | 0.13 | 9 | Endothelial |
| <i>PLCB4</i>    | 0.80 | 0.00 | 0.00 | 0.32 | 0.12 | 9 | Endothelial |
| <i>KLF4</i>     | 0.61 | 0.00 | 0.00 | 0.49 | 0.23 | 9 | Endothelial |
| <i>CBFA2T3</i>  | 0.73 | 0.00 | 0.00 | 0.35 | 0.13 | 9 | Endothelial |
| <i>THBD</i>     | 0.67 | 0.00 | 0.00 | 0.51 | 0.25 | 9 | Endothelial |
| <i>MECOM</i>    | 0.89 | 0.00 | 0.00 | 0.27 | 0.09 | 9 | Endothelial |
| <i>CRIP2</i>    | 0.54 | 0.00 | 0.00 | 0.71 | 0.43 | 9 | Endothelial |
| <i>MYZAP</i>    | 0.58 | 0.00 | 0.00 | 0.36 | 0.14 | 9 | Endothelial |
| <i>UTRN</i>     | 0.79 | 0.00 | 0.00 | 0.37 | 0.16 | 9 | Endothelial |
| <i>KIAA0355</i> | 0.63 | 0.00 | 0.00 | 0.40 | 0.17 | 9 | Endothelial |
| <i>MCAM</i>     | 0.57 | 0.00 | 0.00 | 0.34 | 0.13 | 9 | Endothelial |
| <i>ITGB1</i>    | 0.55 | 0.00 | 0.00 | 0.83 | 0.64 | 9 | Endothelial |
| <i>GNG11</i>    | 0.49 | 0.00 | 0.00 | 0.60 | 0.31 | 9 | Endothelial |
| <i>SLK</i>      | 0.62 | 0.00 | 0.00 | 0.65 | 0.40 | 9 | Endothelial |
| <i>ARMCX1</i>   | 0.72 | 0.00 | 0.00 | 0.27 | 0.10 | 9 | Endothelial |
| <i>ITGA6</i>    | 0.63 | 0.00 | 0.00 | 0.32 | 0.12 | 9 | Endothelial |

|                |      |      |      |      |      |   |             |
|----------------|------|------|------|------|------|---|-------------|
| <i>LUZP1</i>   | 0.62 | 0.00 | 0.00 | 0.41 | 0.19 | 9 | Endothelial |
| <i>S1PR1</i>   | 0.49 | 0.00 | 0.00 | 0.41 | 0.18 | 9 | Endothelial |
| <i>TSPAN18</i> | 0.51 | 0.00 | 0.00 | 0.33 | 0.13 | 9 | Endothelial |
| <i>SWAP70</i>  | 0.59 | 0.00 | 0.00 | 0.27 | 0.10 | 9 | Endothelial |
| <i>TSPAN13</i> | 0.35 | 0.00 | 0.00 | 0.50 | 0.24 | 9 | Endothelial |
| <i>ELN</i>     | 0.62 | 0.00 | 0.00 | 0.39 | 0.18 | 9 | Endothelial |
| <i>GIMAP1</i>  | 0.45 | 0.00 | 0.00 | 0.32 | 0.13 | 9 | Endothelial |
| <i>CD151</i>   | 0.56 | 0.00 | 0.00 | 0.39 | 0.19 | 9 | Endothelial |
| <i>EHD2</i>    | 0.56 | 0.00 | 0.00 | 0.35 | 0.16 | 9 | Endothelial |
| <i>NRP1</i>    | 0.54 | 0.00 | 0.00 | 0.61 | 0.39 | 9 | Endothelial |
| <i>APLP2</i>   | 0.56 | 0.00 | 0.00 | 0.62 | 0.40 | 9 | Endothelial |
| <i>HIP1</i>    | 0.54 | 0.00 | 0.00 | 0.33 | 0.15 | 9 | Endothelial |
| <i>FNBP1L</i>  | 0.50 | 0.00 | 0.00 | 0.45 | 0.24 | 9 | Endothelial |
| <i>KANK3</i>   | 0.49 | 0.00 | 0.00 | 0.31 | 0.13 | 9 | Endothelial |
| <i>HMCN1</i>   | 0.56 | 0.00 | 0.00 | 0.30 | 0.13 | 9 | Endothelial |
| <i>RAPGEF5</i> | 0.51 | 0.00 | 0.00 | 0.26 | 0.11 | 9 | Endothelial |
| <i>ITM2B</i>   | 0.31 | 0.00 | 0.00 | 0.90 | 0.77 | 9 | Endothelial |
| <i>PEA15</i>   | 0.55 | 0.00 | 0.00 | 0.32 | 0.15 | 9 | Endothelial |
| <i>BST2</i>    | 0.63 | 0.00 | 0.00 | 0.33 | 0.15 | 9 | Endothelial |
| <i>NAV1</i>    | 0.54 | 0.00 | 0.00 | 0.25 | 0.10 | 9 | Endothelial |
| <i>ANXA2</i>   | 0.47 | 0.00 | 0.00 | 0.68 | 0.49 | 9 | Endothelial |
| <i>TRIB2</i>   | 0.52 | 0.00 | 0.00 | 0.25 | 0.10 | 9 | Endothelial |
| <i>TCF4</i>    | 0.47 | 0.00 | 0.00 | 0.64 | 0.41 | 9 | Endothelial |
| <i>FLI1</i>    | 0.47 | 0.00 | 0.00 | 0.27 | 0.11 | 9 | Endothelial |
| <i>SPTBN1</i>  | 0.39 | 0.00 | 0.00 | 0.76 | 0.53 | 9 | Endothelial |
| <i>AZIN1</i>   | 0.67 | 0.00 | 0.00 | 0.27 | 0.12 | 9 | Endothelial |
| <i>ACTN4</i>   | 0.49 | 0.00 | 0.00 | 0.50 | 0.29 | 9 | Endothelial |
| <i>CCDC85B</i> | 0.51 | 0.00 | 0.00 | 0.30 | 0.14 | 9 | Endothelial |
| <i>CD2AP</i>   | 0.61 | 0.00 | 0.00 | 0.50 | 0.31 | 9 | Endothelial |
| <i>AGRN</i>    | 0.44 | 0.00 | 0.00 | 0.28 | 0.12 | 9 | Endothelial |
| <i>SEMA6A</i>  | 0.41 | 0.00 | 0.00 | 0.27 | 0.12 | 9 | Endothelial |
| <i>NCK1</i>    | 0.50 | 0.00 | 0.00 | 0.28 | 0.13 | 9 | Endothelial |
| <i>MAPK3</i>   | 0.46 | 0.00 | 0.00 | 0.29 | 0.13 | 9 | Endothelial |
| <i>C1orf54</i> | 0.36 | 0.00 | 0.00 | 0.52 | 0.29 | 9 | Endothelial |
| <i>UACA</i>    | 0.51 | 0.00 | 0.00 | 0.30 | 0.14 | 9 | Endothelial |
| <i>SOX4</i>    | 0.55 | 0.00 | 0.00 | 0.60 | 0.40 | 9 | Endothelial |
| <i>PLEC</i>    | 0.47 | 0.00 | 0.00 | 0.27 | 0.12 | 9 | Endothelial |
| <i>HPGD</i>    | 0.35 | 0.00 | 0.00 | 0.47 | 0.26 | 9 | Endothelial |
| <i>DDAH2</i>   | 0.41 | 0.00 | 0.00 | 0.48 | 0.28 | 9 | Endothelial |
| <i>RHOC</i>    | 0.50 | 0.00 | 0.00 | 0.42 | 0.24 | 9 | Endothelial |
| <i>PDLIM1</i>  | 0.51 | 0.00 | 0.00 | 0.31 | 0.15 | 9 | Endothelial |
| <i>HDAC7</i>   | 0.46 | 0.00 | 0.00 | 0.29 | 0.14 | 9 | Endothelial |
| <i>AMD1</i>    | 0.89 | 0.00 | 0.00 | 0.33 | 0.17 | 9 | Endothelial |

|                 |      |      |      |      |      |   |             |
|-----------------|------|------|------|------|------|---|-------------|
| <i>HSP90AB1</i> | 0.27 | 0.00 | 0.00 | 0.94 | 0.89 | 9 | Endothelial |
| <i>DST</i>      | 0.54 | 0.00 | 0.00 | 0.31 | 0.16 | 9 | Endothelial |
| <i>VAMP5</i>    | 0.49 | 0.00 | 0.00 | 0.27 | 0.13 | 9 | Endothelial |
| <i>MARCKS</i>   | 0.32 | 0.00 | 0.00 | 0.70 | 0.49 | 9 | Endothelial |
| <i>ANXA3</i>    | 0.34 | 0.00 | 0.00 | 0.40 | 0.22 | 9 | Endothelial |
| <i>TMEM109</i>  | 0.44 | 0.00 | 0.00 | 0.27 | 0.13 | 9 | Endothelial |
| <i>MARCKSL1</i> | 0.50 | 0.00 | 0.00 | 0.39 | 0.23 | 9 | Endothelial |
| <i>CMIP</i>     | 0.49 | 0.00 | 0.00 | 0.33 | 0.18 | 9 | Endothelial |
| <i>SKAP2</i>    | 0.40 | 0.00 | 0.00 | 0.27 | 0.13 | 9 | Endothelial |
| <i>MAP7D1</i>   | 0.40 | 0.00 | 0.00 | 0.33 | 0.18 | 9 | Endothelial |
| <i>RASGRP3</i>  | 0.38 | 0.00 | 0.00 | 0.25 | 0.12 | 9 | Endothelial |
| <i>TMOD3</i>    | 0.46 | 0.00 | 0.00 | 0.42 | 0.26 | 9 | Endothelial |
| <i>FAM3C</i>    | 0.81 | 0.00 | 0.00 | 0.26 | 0.14 | 9 | Endothelial |
| <i>EDNRB</i>    | 0.28 | 0.00 | 0.00 | 0.30 | 0.16 | 9 | Endothelial |
| <i>CCDC50</i>   | 0.42 | 0.00 | 0.00 | 0.41 | 0.25 | 9 | Endothelial |
| <i>ZMIZ1</i>    | 0.45 | 0.00 | 0.00 | 0.35 | 0.20 | 9 | Endothelial |
| <i>ADAM10</i>   | 0.53 | 0.00 | 0.00 | 0.32 | 0.18 | 9 | Endothelial |
| <i>CTNNA1</i>   | 0.37 | 0.00 | 0.00 | 0.53 | 0.36 | 9 | Endothelial |
| <i>CLIC1</i>    | 0.33 | 0.00 | 0.00 | 0.56 | 0.39 | 9 | Endothelial |
| <i>KLHL5</i>    | 0.47 | 0.00 | 0.00 | 0.27 | 0.14 | 9 | Endothelial |
| <i>TSC22D1</i>  | 0.41 | 0.00 | 0.00 | 0.51 | 0.35 | 9 | Endothelial |
| <i>ATP2B1</i>   | 0.42 | 0.00 | 0.00 | 0.69 | 0.55 | 9 | Endothelial |
| <i>ARHGAP29</i> | 0.34 | 0.00 | 0.00 | 0.39 | 0.23 | 9 | Endothelial |
| <i>YBX3</i>     | 0.40 | 0.00 | 0.00 | 0.33 | 0.19 | 9 | Endothelial |
| <i>SPAG9</i>    | 0.45 | 0.00 | 0.00 | 0.29 | 0.16 | 9 | Endothelial |
| <i>SNX3</i>     | 0.38 | 0.00 | 0.00 | 0.51 | 0.35 | 9 | Endothelial |
| <i>TJP1</i>     | 0.39 | 0.00 | 0.00 | 0.31 | 0.17 | 9 | Endothelial |
| <i>RALB</i>     | 0.35 | 0.00 | 0.00 | 0.34 | 0.19 | 9 | Endothelial |
| <i>PHACTR2</i>  | 0.38 | 0.00 | 0.00 | 0.26 | 0.14 | 9 | Endothelial |
| <i>ATP1B3</i>   | 0.39 | 0.00 | 0.00 | 0.41 | 0.26 | 9 | Endothelial |
| <i>LIMA1</i>    | 0.41 | 0.00 | 0.00 | 0.27 | 0.15 | 9 | Endothelial |
| <i>CNN3</i>     | 0.32 | 0.00 | 0.00 | 0.51 | 0.32 | 9 | Endothelial |
| <i>GPIHBP1</i>  | 0.30 | 0.00 | 0.00 | 0.29 | 0.16 | 9 | Endothelial |
| <i>CLIC4</i>    | 0.36 | 0.00 | 0.00 | 0.45 | 0.30 | 9 | Endothelial |
| <i>BNIP2</i>    | 0.38 | 0.00 | 0.00 | 0.44 | 0.28 | 9 | Endothelial |
| <i>NFE2L1</i>   | 0.40 | 0.00 | 0.00 | 0.35 | 0.21 | 9 | Endothelial |
| <i>PPFIBP1</i>  | 0.40 | 0.00 | 0.00 | 0.26 | 0.14 | 9 | Endothelial |
| <i>GCC2</i>     | 0.46 | 0.00 | 0.00 | 0.38 | 0.24 | 9 | Endothelial |
| <i>PREX2</i>    | 0.42 | 0.00 | 0.00 | 0.29 | 0.17 | 9 | Endothelial |
| <i>S100A10</i>  | 0.36 | 0.00 | 0.00 | 0.56 | 0.41 | 9 | Endothelial |
| <i>CCSER2</i>   | 0.36 | 0.00 | 0.00 | 0.26 | 0.14 | 9 | Endothelial |
| <i>AMOTL1</i>   | 0.32 | 0.00 | 0.00 | 0.27 | 0.15 | 9 | Endothelial |
| <i>CARHSP1</i>  | 0.37 | 0.00 | 0.00 | 0.27 | 0.15 | 9 | Endothelial |

|                |      |      |      |      |      |   |             |
|----------------|------|------|------|------|------|---|-------------|
| <i>XIAP</i>    | 0.37 | 0.00 | 0.00 | 0.32 | 0.19 | 9 | Endothelial |
| <i>PLTP</i>    | 0.40 | 0.00 | 0.00 | 0.30 | 0.17 | 9 | Endothelial |
| <i>GNAI2</i>   | 0.30 | 0.00 | 0.00 | 0.55 | 0.38 | 9 | Endothelial |
| <i>SYPL1</i>   | 0.35 | 0.00 | 0.00 | 0.40 | 0.26 | 9 | Endothelial |
| <i>KTN1</i>    | 0.30 | 0.00 | 0.00 | 0.54 | 0.39 | 9 | Endothelial |
| <i>PDIA3</i>   | 0.33 | 0.00 | 0.00 | 0.60 | 0.46 | 9 | Endothelial |
| <i>ADAMTS1</i> | 0.38 | 0.00 | 0.00 | 0.32 | 0.20 | 9 | Endothelial |
| <i>STMN1</i>   | 0.49 | 0.00 | 0.00 | 0.36 | 0.24 | 9 | Endothelial |
| <i>G3BP2</i>   | 0.39 | 0.00 | 0.00 | 0.42 | 0.29 | 9 | Endothelial |
| <i>AFAP1L1</i> | 0.37 | 0.00 | 0.00 | 0.29 | 0.17 | 9 | Endothelial |
| <i>SEPT2</i>   | 0.30 | 0.00 | 0.00 | 0.51 | 0.37 | 9 | Endothelial |
| <i>PTTG1IP</i> | 0.30 | 0.00 | 0.00 | 0.30 | 0.18 | 9 | Endothelial |
| <i>MSN</i>     | 0.26 | 0.00 | 0.00 | 0.59 | 0.44 | 9 | Endothelial |
| <i>DNAJA1</i>  | 0.32 | 0.00 | 0.00 | 0.64 | 0.51 | 9 | Endothelial |
| <i>SPTAN1</i>  | 0.33 | 0.00 | 0.00 | 0.28 | 0.17 | 9 | Endothelial |
| <i>CFLAR</i>   | 0.30 | 0.00 | 0.00 | 0.31 | 0.19 | 9 | Endothelial |
| <i>ARGLU1</i>  | 0.32 | 0.00 | 0.00 | 0.55 | 0.41 | 9 | Endothelial |
| <i>CD36</i>    | 0.27 | 0.00 | 0.00 | 0.49 | 0.33 | 9 | Endothelial |
| <i>CYB5R3</i>  | 0.29 | 0.00 | 0.00 | 0.53 | 0.39 | 9 | Endothelial |
| <i>DYNLL1</i>  | 0.30 | 0.00 | 0.00 | 0.60 | 0.47 | 9 | Endothelial |
| <i>NRAS</i>    | 0.33 | 0.00 | 0.00 | 0.26 | 0.15 | 9 | Endothelial |
| <i>ARHGEF2</i> | 0.31 | 0.00 | 0.00 | 0.31 | 0.19 | 9 | Endothelial |
| <i>NFIC</i>    | 0.36 | 0.00 | 0.00 | 0.37 | 0.25 | 9 | Endothelial |
| <i>TXNIP</i>   | 0.27 | 0.00 | 0.00 | 0.40 | 0.27 | 9 | Endothelial |
| <i>CTNNB1</i>  | 0.32 | 0.00 | 0.00 | 0.48 | 0.34 | 9 | Endothelial |
| <i>NFKBIA</i>  | 0.25 | 0.00 | 0.00 | 0.50 | 0.36 | 9 | Endothelial |
| <i>ELOVL5</i>  | 0.30 | 0.00 | 0.00 | 0.25 | 0.15 | 9 | Endothelial |
| <i>VAMP3</i>   | 0.33 | 0.00 | 0.00 | 0.25 | 0.15 | 9 | Endothelial |
| <i>GLUL</i>    | 0.65 | 0.00 | 0.00 | 0.32 | 0.22 | 9 | Endothelial |
| <i>PLCG1</i>   | 0.31 | 0.00 | 0.00 | 0.26 | 0.15 | 9 | Endothelial |
| <i>NDUFA8</i>  | 0.34 | 0.00 | 0.00 | 0.36 | 0.25 | 9 | Endothelial |
| <i>SEPT11</i>  | 0.32 | 0.00 | 0.00 | 0.34 | 0.23 | 9 | Endothelial |
| <i>IER2</i>    | 0.27 | 0.00 | 0.00 | 0.38 | 0.26 | 9 | Endothelial |
| <i>S100A13</i> | 0.30 | 0.00 | 0.00 | 0.39 | 0.27 | 9 | Endothelial |
| <i>TNFAIP1</i> | 0.32 | 0.00 | 0.00 | 0.26 | 0.16 | 9 | Endothelial |
| <i>PPIC</i>    | 0.27 | 0.00 | 0.00 | 0.52 | 0.38 | 9 | Endothelial |
| <i>SMARCA2</i> | 0.32 | 0.00 | 0.00 | 0.45 | 0.33 | 9 | Endothelial |
| <i>NUDT4</i>   | 0.35 | 0.00 | 0.00 | 0.26 | 0.16 | 9 | Endothelial |
| <i>LEPROT</i>  | 0.28 | 0.00 | 0.00 | 0.46 | 0.34 | 9 | Endothelial |
| <i>CNIH1</i>   | 0.28 | 0.00 | 0.00 | 0.29 | 0.19 | 9 | Endothelial |
| <i>TSPO</i>    | 0.26 | 0.00 | 0.00 | 0.38 | 0.27 | 9 | Endothelial |
| <i>ANO6</i>    | 0.33 | 0.00 | 0.00 | 0.26 | 0.17 | 9 | Endothelial |
| <i>EMP3</i>    | 0.28 | 0.00 | 0.00 | 0.35 | 0.24 | 9 | Endothelial |

|                 |      |      |      |      |      |    |               |
|-----------------|------|------|------|------|------|----|---------------|
| <i>NAP1L4</i>   | 0.29 | 0.00 | 0.00 | 0.36 | 0.25 | 9  | Endothelial   |
| <i>WASF2</i>    | 0.26 | 0.00 | 0.00 | 0.42 | 0.30 | 9  | Endothelial   |
| <i>HOOK3</i>    | 0.29 | 0.00 | 0.00 | 0.32 | 0.22 | 9  | Endothelial   |
| <i>ZC3H7A</i>   | 0.31 | 0.00 | 0.00 | 0.37 | 0.26 | 9  | Endothelial   |
| <i>TTC3</i>     | 0.29 | 0.00 | 0.00 | 0.40 | 0.29 | 9  | Endothelial   |
| <i>ZBTB20</i>   | 0.34 | 0.00 | 0.00 | 0.37 | 0.27 | 9  | Endothelial   |
| <i>GOLIM4</i>   | 0.30 | 0.00 | 0.00 | 0.30 | 0.20 | 9  | Endothelial   |
| <i>HES1</i>     | 0.31 | 0.00 | 0.00 | 0.40 | 0.29 | 9  | Endothelial   |
| <i>GUK1</i>     | 0.36 | 0.00 | 0.00 | 0.28 | 0.19 | 9  | Endothelial   |
| <i>ITM2C</i>    | 0.26 | 0.00 | 0.00 | 0.33 | 0.24 | 9  | Endothelial   |
| <i>SRPRA</i>    | 0.25 | 0.00 | 0.00 | 0.32 | 0.23 | 9  | Endothelial   |
| <i>PPIA</i>     | 0.29 | 0.00 | 0.00 | 0.30 | 0.21 | 9  | Endothelial   |
| <i>IVNS1ABP</i> | 0.33 | 0.00 | 0.00 | 0.28 | 0.21 | 9  | Endothelial   |
| <i>DDX3X</i>    | 0.26 | 0.00 | 0.00 | 0.38 | 0.29 | 9  | Endothelial   |
| <i>TIA1</i>     | 0.25 | 0.00 | 0.00 | 0.28 | 0.21 | 9  | Endothelial   |
| <i>MGP</i>      | 0.26 | 0.00 | 0.00 | 0.43 | 0.34 | 9  | Endothelial   |
| <i>COL1A1</i>   | 2.65 | 0.00 | 0.00 | 0.97 | 0.28 | 10 | Myofibroblast |
| <i>DCN</i>      | 2.62 | 0.00 | 0.00 | 0.70 | 0.05 | 10 | Myofibroblast |
| <i>COL3A1</i>   | 2.55 | 0.00 | 0.00 | 0.98 | 0.34 | 10 | Myofibroblast |
| <i>COL1A2</i>   | 2.36 | 0.00 | 0.00 | 0.99 | 0.40 | 10 | Myofibroblast |
| <i>MFAP5</i>    | 2.17 | 0.00 | 0.00 | 0.53 | 0.05 | 10 | Myofibroblast |
| <i>COL14A1</i>  | 2.05 | 0.00 | 0.00 | 0.59 | 0.05 | 10 | Myofibroblast |
| <i>GPC3</i>     | 1.98 | 0.00 | 0.00 | 0.80 | 0.17 | 10 | Myofibroblast |
| <i>CCDC80</i>   | 1.66 | 0.00 | 0.00 | 0.60 | 0.12 | 10 | Myofibroblast |
| <i>AEBP1</i>    | 1.56 | 0.00 | 0.00 | 0.48 | 0.07 | 10 | Myofibroblast |
| <i>CYGB</i>     | 1.49 | 0.00 | 0.00 | 0.47 | 0.06 | 10 | Myofibroblast |
| <i>OGN</i>      | 1.43 | 0.00 | 0.00 | 0.62 | 0.13 | 10 | Myofibroblast |
| <i>PCOLCE</i>   | 1.41 | 0.00 | 0.00 | 0.58 | 0.10 | 10 | Myofibroblast |
| <i>C1R</i>      | 1.37 | 0.00 | 0.00 | 0.40 | 0.04 | 10 | Myofibroblast |
| <i>SERPINF1</i> | 1.36 | 0.00 | 0.00 | 0.31 | 0.02 | 10 | Myofibroblast |
| <i>SERPING1</i> | 1.31 | 0.00 | 0.00 | 0.63 | 0.13 | 10 | Myofibroblast |
| <i>COL5A1</i>   | 1.30 | 0.00 | 0.00 | 0.54 | 0.10 | 10 | Myofibroblast |
| <i>THBS2</i>    | 1.16 | 0.00 | 0.00 | 0.29 | 0.02 | 10 | Myofibroblast |
| <i>RCN3</i>     | 1.33 | 0.00 | 0.00 | 0.58 | 0.12 | 10 | Myofibroblast |
| <i>MGP</i>      | 1.77 | 0.00 | 0.00 | 0.89 | 0.32 | 10 | Myofibroblast |
| <i>GAS1</i>     | 1.16 | 0.00 | 0.00 | 0.32 | 0.04 | 10 | Myofibroblast |
| <i>FBLN1</i>    | 1.47 | 0.00 | 0.00 | 0.43 | 0.07 | 10 | Myofibroblast |
| <i>ADAMTS2</i>  | 1.25 | 0.00 | 0.00 | 0.50 | 0.09 | 10 | Myofibroblast |
| <i>ASPN</i>     | 0.83 | 0.00 | 0.00 | 0.52 | 0.10 | 10 | Myofibroblast |
| <i>BGN</i>      | 1.26 | 0.00 | 0.00 | 0.81 | 0.25 | 10 | Myofibroblast |
| <i>COL6A2</i>   | 1.30 | 0.00 | 0.00 | 0.67 | 0.17 | 10 | Myofibroblast |
| <i>LUM</i>      | 1.36 | 0.00 | 0.00 | 0.31 | 0.04 | 10 | Myofibroblast |
| <i>SPARC</i>    | 1.36 | 0.00 | 0.00 | 0.99 | 0.76 | 10 | Myofibroblast |

|                 |      |      |      |      |      |    |               |
|-----------------|------|------|------|------|------|----|---------------|
| <i>PLAC9</i>    | 1.17 | 0.00 | 0.00 | 0.88 | 0.29 | 10 | Myofibroblast |
| <i>LTBP4</i>    | 1.12 | 0.00 | 0.00 | 0.54 | 0.11 | 10 | Myofibroblast |
| <i>CPE</i>      | 1.17 | 0.00 | 0.00 | 0.28 | 0.03 | 10 | Myofibroblast |
| <i>PRRX1</i>    | 1.01 | 0.00 | 0.00 | 0.26 | 0.03 | 10 | Myofibroblast |
| <i>COL6A1</i>   | 1.18 | 0.00 | 0.00 | 0.71 | 0.21 | 10 | Myofibroblast |
| <i>IGFBP5</i>   | 1.99 | 0.00 | 0.00 | 0.46 | 0.10 | 10 | Myofibroblast |
| <i>RARRES2</i>  | 1.36 | 0.00 | 0.00 | 0.60 | 0.16 | 10 | Myofibroblast |
| <i>COL5A2</i>   | 1.15 | 0.00 | 0.00 | 0.63 | 0.18 | 10 | Myofibroblast |
| <i>IGFBP6</i>   | 1.32 | 0.00 | 0.00 | 0.26 | 0.03 | 10 | Myofibroblast |
| <i>BICC1</i>    | 1.05 | 0.00 | 0.00 | 0.35 | 0.06 | 10 | Myofibroblast |
| <i>ELN</i>      | 1.25 | 0.00 | 0.00 | 0.60 | 0.17 | 10 | Myofibroblast |
| <i>LGALS1</i>   | 1.03 | 0.00 | 0.00 | 0.92 | 0.46 | 10 | Myofibroblast |
| <i>FBN1</i>     | 1.12 | 0.00 | 0.00 | 0.58 | 0.17 | 10 | Myofibroblast |
| <i>LOXL1</i>    | 0.99 | 0.00 | 0.00 | 0.46 | 0.11 | 10 | Myofibroblast |
| <i>FSTL1</i>    | 1.12 | 0.00 | 0.00 | 0.86 | 0.45 | 10 | Myofibroblast |
| <i>POSTN</i>    | 1.59 | 0.00 | 0.00 | 0.39 | 0.09 | 10 | Myofibroblast |
| <i>COL6A3</i>   | 0.95 | 0.00 | 0.00 | 0.47 | 0.12 | 10 | Myofibroblast |
| <i>MMP23B</i>   | 0.76 | 0.00 | 0.00 | 0.26 | 0.04 | 10 | Myofibroblast |
| <i>TIMP1</i>    | 1.60 | 0.00 | 0.00 | 0.36 | 0.08 | 10 | Myofibroblast |
| <i>IGF2</i>     | 1.34 | 0.00 | 0.00 | 0.31 | 0.06 | 10 | Myofibroblast |
| <i>GSN</i>      | 1.29 | 0.00 | 0.00 | 0.64 | 0.24 | 10 | Myofibroblast |
| <i>IGFBP3</i>   | 1.16 | 0.00 | 0.00 | 0.29 | 0.06 | 10 | Myofibroblast |
| <i>IGFBP7</i>   | 0.86 | 0.00 | 0.00 | 0.85 | 0.42 | 10 | Myofibroblast |
| <i>SERPINH1</i> | 0.81 | 0.00 | 0.00 | 0.82 | 0.41 | 10 | Myofibroblast |
| <i>CDH11</i>    | 0.67 | 0.00 | 0.00 | 0.58 | 0.19 | 10 | Myofibroblast |
| <i>CD63</i>     | 1.03 | 0.00 | 0.00 | 0.71 | 0.34 | 10 | Myofibroblast |
| <i>IGFBP4</i>   | 0.92 | 0.00 | 0.00 | 0.64 | 0.27 | 10 | Myofibroblast |
| <i>DPT</i>      | 1.00 | 0.00 | 0.00 | 0.50 | 0.17 | 10 | Myofibroblast |
| <i>VCAN</i>     | 0.83 | 0.00 | 0.00 | 0.43 | 0.13 | 10 | Myofibroblast |
| <i>VKORC1</i>   | 0.78 | 0.00 | 0.00 | 0.39 | 0.11 | 10 | Myofibroblast |
| <i>COL16A1</i>  | 0.76 | 0.00 | 0.00 | 0.26 | 0.06 | 10 | Myofibroblast |
| <i>TIMP2</i>    | 0.85 | 0.00 | 0.00 | 0.56 | 0.21 | 10 | Myofibroblast |
| <i>AKAP12</i>   | 1.33 | 0.00 | 0.00 | 0.55 | 0.24 | 10 | Myofibroblast |
| <i>NDN</i>      | 0.71 | 0.00 | 0.00 | 0.30 | 0.08 | 10 | Myofibroblast |
| <i>S100A6</i>   | 0.54 | 0.00 | 0.00 | 0.75 | 0.35 | 10 | Myofibroblast |
| <i>CLEC3B</i>   | 0.86 | 0.00 | 0.00 | 0.27 | 0.07 | 10 | Myofibroblast |
| <i>TUBB6</i>    | 0.64 | 0.00 | 0.00 | 0.30 | 0.08 | 10 | Myofibroblast |
| <i>LMNA</i>     | 1.07 | 0.00 | 0.00 | 0.54 | 0.22 | 10 | Myofibroblast |
| <i>FXYD1</i>    | 0.65 | 0.00 | 0.00 | 0.34 | 0.10 | 10 | Myofibroblast |
| <i>TMED3</i>    | 0.69 | 0.00 | 0.00 | 0.39 | 0.12 | 10 | Myofibroblast |
| <i>PRSS35</i>   | 0.70 | 0.00 | 0.00 | 0.30 | 0.08 | 10 | Myofibroblast |
| <i>SEMA5A</i>   | 0.73 | 0.00 | 0.00 | 0.25 | 0.06 | 10 | Myofibroblast |
| <i>LTBP1</i>    | 0.75 | 0.00 | 0.00 | 0.25 | 0.06 | 10 | Myofibroblast |

|                 |      |      |      |      |      |    |               |
|-----------------|------|------|------|------|------|----|---------------|
| <i>GPX8</i>     | 0.75 | 0.00 | 0.00 | 0.39 | 0.13 | 10 | Myofibroblast |
| <i>NFIB</i>     | 0.69 | 0.00 | 0.00 | 0.81 | 0.47 | 10 | Myofibroblast |
| <i>RAB34</i>    | 0.65 | 0.00 | 0.00 | 0.33 | 0.10 | 10 | Myofibroblast |
| <i>CKAP4</i>    | 0.73 | 0.00 | 0.00 | 0.46 | 0.17 | 10 | Myofibroblast |
| <i>GPX3</i>     | 0.69 | 0.00 | 0.00 | 0.41 | 0.14 | 10 | Myofibroblast |
| <i>ITM2A</i>    | 0.85 | 0.00 | 0.00 | 0.28 | 0.08 | 10 | Myofibroblast |
| <i>MMP14</i>    | 0.77 | 0.00 | 0.00 | 0.56 | 0.25 | 10 | Myofibroblast |
| <i>PEG3</i>     | 0.94 | 0.00 | 0.00 | 0.56 | 0.26 | 10 | Myofibroblast |
| <i>OLFML2B</i>  | 0.57 | 0.00 | 0.00 | 0.26 | 0.07 | 10 | Myofibroblast |
| <i>PBX1</i>     | 0.71 | 0.00 | 0.00 | 0.49 | 0.19 | 10 | Myofibroblast |
| <i>COLEC12</i>  | 0.60 | 0.00 | 0.00 | 0.34 | 0.11 | 10 | Myofibroblast |
| <i>FAM114A1</i> | 0.65 | 0.00 | 0.00 | 0.31 | 0.09 | 10 | Myofibroblast |
| <i>MAGED2</i>   | 0.64 | 0.00 | 0.00 | 0.51 | 0.20 | 10 | Myofibroblast |
| <i>MDK</i>      | 0.59 | 0.00 | 0.00 | 0.54 | 0.22 | 10 | Myofibroblast |
| <i>NR2F2</i>    | 0.65 | 0.00 | 0.00 | 0.49 | 0.20 | 10 | Myofibroblast |
| <i>KDELR2</i>   | 0.74 | 0.00 | 0.00 | 0.48 | 0.21 | 10 | Myofibroblast |
| <i>EFEMP2</i>   | 0.64 | 0.00 | 0.00 | 0.29 | 0.09 | 10 | Myofibroblast |
| <i>PLXDC2</i>   | 0.56 | 0.00 | 0.00 | 0.37 | 0.13 | 10 | Myofibroblast |
| <i>CRTAP</i>    | 0.58 | 0.00 | 0.00 | 0.28 | 0.08 | 10 | Myofibroblast |
| <i>FGFR1</i>    | 0.56 | 0.00 | 0.00 | 0.33 | 0.11 | 10 | Myofibroblast |
| <i>LRP1</i>     | 0.58 | 0.00 | 0.00 | 0.35 | 0.12 | 10 | Myofibroblast |
| <i>TPM2</i>     | 0.46 | 0.00 | 0.00 | 0.45 | 0.17 | 10 | Myofibroblast |
| <i>FKBP7</i>    | 0.60 | 0.00 | 0.00 | 0.38 | 0.14 | 10 | Myofibroblast |
| <i>MFAP2</i>    | 0.68 | 0.00 | 0.00 | 0.66 | 0.35 | 10 | Myofibroblast |
| <i>LOXL2</i>    | 0.44 | 0.00 | 0.00 | 0.36 | 0.13 | 10 | Myofibroblast |
| <i>IKBIP</i>    | 0.54 | 0.00 | 0.00 | 0.27 | 0.09 | 10 | Myofibroblast |
| <i>PMEPA1</i>   | 0.66 | 0.00 | 0.00 | 0.31 | 0.11 | 10 | Myofibroblast |
| <i>FKBP9</i>    | 0.59 | 0.00 | 0.00 | 0.36 | 0.14 | 10 | Myofibroblast |
| <i>NID1</i>     | 0.58 | 0.00 | 0.00 | 0.51 | 0.23 | 10 | Myofibroblast |
| <i>S100A11</i>  | 0.58 | 0.00 | 0.00 | 0.77 | 0.49 | 10 | Myofibroblast |
| <i>RNASE4</i>   | 0.64 | 0.00 | 0.00 | 0.42 | 0.17 | 10 | Myofibroblast |
| <i>NDRG2</i>    | 0.59 | 0.00 | 0.00 | 0.27 | 0.09 | 10 | Myofibroblast |
| <i>ANTXR1</i>   | 0.61 | 0.00 | 0.00 | 0.34 | 0.13 | 10 | Myofibroblast |
| <i>GPX7</i>     | 0.61 | 0.00 | 0.00 | 0.28 | 0.10 | 10 | Myofibroblast |
| <i>CBX6</i>     | 0.54 | 0.00 | 0.00 | 0.31 | 0.11 | 10 | Myofibroblast |
| <i>FKBP10</i>   | 0.52 | 0.00 | 0.00 | 0.26 | 0.09 | 10 | Myofibroblast |
| <i>CPED1</i>    | 0.61 | 0.00 | 0.00 | 0.27 | 0.09 | 10 | Myofibroblast |
| <i>EID1</i>     | 0.59 | 0.00 | 0.00 | 0.60 | 0.32 | 10 | Myofibroblast |
| <i>NFIA</i>     | 0.61 | 0.00 | 0.00 | 0.50 | 0.24 | 10 | Myofibroblast |
| <i>LHFPL2</i>   | 0.71 | 0.00 | 0.00 | 0.25 | 0.08 | 10 | Myofibroblast |
| <i>RRBP1</i>    | 0.61 | 0.00 | 0.00 | 0.77 | 0.54 | 10 | Myofibroblast |
| <i>ARF4</i>     | 0.60 | 0.00 | 0.00 | 0.55 | 0.29 | 10 | Myofibroblast |
| <i>EDNRA</i>    | 0.51 | 0.00 | 0.00 | 0.28 | 0.10 | 10 | Myofibroblast |

|                |      |      |      |      |      |    |               |
|----------------|------|------|------|------|------|----|---------------|
| <i>IGF1</i>    | 0.71 | 0.00 | 0.00 | 0.34 | 0.13 | 10 | Myofibroblast |
| <i>S100A10</i> | 0.68 | 0.00 | 0.00 | 0.66 | 0.40 | 10 | Myofibroblast |
| <i>TWSG1</i>   | 0.47 | 0.00 | 0.00 | 0.31 | 0.12 | 10 | Myofibroblast |
| <i>CST3</i>    | 0.40 | 0.00 | 0.00 | 0.82 | 0.58 | 10 | Myofibroblast |
| <i>LAPTM4A</i> | 0.46 | 0.00 | 0.00 | 0.79 | 0.55 | 10 | Myofibroblast |
| <i>PMP22</i>   | 0.38 | 0.00 | 0.00 | 0.62 | 0.33 | 10 | Myofibroblast |
| <i>LAMB1</i>   | 0.54 | 0.00 | 0.00 | 0.36 | 0.15 | 10 | Myofibroblast |
| <i>OLFML3</i>  | 0.50 | 0.00 | 0.00 | 0.27 | 0.10 | 10 | Myofibroblast |
| <i>CALU</i>    | 0.53 | 0.00 | 0.00 | 0.50 | 0.25 | 10 | Myofibroblast |
| <i>CDKN1C</i>  | 0.82 | 0.00 | 0.00 | 0.37 | 0.17 | 10 | Myofibroblast |
| <i>APOE</i>    | 0.34 | 0.00 | 0.00 | 0.53 | 0.27 | 10 | Myofibroblast |
| <i>MYH10</i>   | 0.41 | 0.00 | 0.00 | 0.48 | 0.22 | 10 | Myofibroblast |
| <i>TUBA1A</i>  | 0.50 | 0.00 | 0.00 | 0.79 | 0.52 | 10 | Myofibroblast |
| <i>DKK3</i>    | 0.43 | 0.00 | 0.00 | 0.33 | 0.13 | 10 | Myofibroblast |
| <i>FHL1</i>    | 0.36 | 0.00 | 0.00 | 0.60 | 0.30 | 10 | Myofibroblast |
| <i>FBLN5</i>   | 0.35 | 0.00 | 0.00 | 0.41 | 0.18 | 10 | Myofibroblast |
| <i>CD302</i>   | 0.49 | 0.00 | 0.00 | 0.35 | 0.14 | 10 | Myofibroblast |
| <i>RBMS3</i>   | 0.48 | 0.00 | 0.00 | 0.40 | 0.17 | 10 | Myofibroblast |
| <i>FIBIN</i>   | 0.51 | 0.00 | 0.00 | 0.29 | 0.11 | 10 | Myofibroblast |
| <i>MORF4L2</i> | 0.51 | 0.00 | 0.00 | 0.47 | 0.23 | 10 | Myofibroblast |
| <i>PPIC</i>    | 0.46 | 0.00 | 0.00 | 0.65 | 0.38 | 10 | Myofibroblast |
| <i>NENF</i>    | 0.51 | 0.00 | 0.00 | 0.42 | 0.20 | 10 | Myofibroblast |
| <i>NUPR1</i>   | 0.39 | 0.00 | 0.00 | 0.44 | 0.20 | 10 | Myofibroblast |
| <i>DPYSL3</i>  | 0.42 | 0.00 | 0.00 | 0.25 | 0.09 | 10 | Myofibroblast |
| <i>CYR61</i>   | 0.77 | 0.00 | 0.00 | 0.29 | 0.12 | 10 | Myofibroblast |
| <i>SPARCL1</i> | 0.37 | 0.00 | 0.00 | 0.70 | 0.41 | 10 | Myofibroblast |
| <i>CALD1</i>   | 0.26 | 0.00 | 0.00 | 0.74 | 0.44 | 10 | Myofibroblast |
| <i>EGR1</i>    | 0.72 | 0.00 | 0.00 | 0.28 | 0.11 | 10 | Myofibroblast |
| <i>NFIX</i>    | 0.51 | 0.00 | 0.00 | 0.36 | 0.16 | 10 | Myofibroblast |
| <i>SEC61G</i>  | 0.48 | 0.00 | 0.00 | 0.61 | 0.37 | 10 | Myofibroblast |
| <i>SPATS2L</i> | 0.49 | 0.00 | 0.00 | 0.26 | 0.10 | 10 | Myofibroblast |
| <i>MYL9</i>    | 0.30 | 0.00 | 0.00 | 0.38 | 0.17 | 10 | Myofibroblast |
| <i>MAGED1</i>  | 0.53 | 0.00 | 0.00 | 0.38 | 0.18 | 10 | Myofibroblast |
| <i>ANXA5</i>   | 0.43 | 0.00 | 0.00 | 0.67 | 0.43 | 10 | Myofibroblast |
| <i>FCGRT</i>   | 0.39 | 0.00 | 0.00 | 0.31 | 0.13 | 10 | Myofibroblast |
| <i>PPIB</i>    | 0.43 | 0.00 | 0.00 | 0.69 | 0.46 | 10 | Myofibroblast |
| <i>EMP3</i>    | 0.40 | 0.00 | 0.00 | 0.47 | 0.24 | 10 | Myofibroblast |
| <i>PTPRD</i>   | 0.44 | 0.00 | 0.00 | 0.28 | 0.11 | 10 | Myofibroblast |
| <i>PRDX4</i>   | 0.47 | 0.00 | 0.00 | 0.34 | 0.16 | 10 | Myofibroblast |
| <i>YBX3</i>    | 0.44 | 0.00 | 0.00 | 0.39 | 0.19 | 10 | Myofibroblast |
| <i>VIM</i>     | 0.49 | 0.00 | 0.00 | 0.88 | 0.69 | 10 | Myofibroblast |
| <i>HDLBP</i>   | 0.43 | 0.00 | 0.00 | 0.41 | 0.21 | 10 | Myofibroblast |
| <i>MTCH1</i>   | 0.43 | 0.00 | 0.00 | 0.36 | 0.17 | 10 | Myofibroblast |

|                |      |      |      |      |      |    |               |
|----------------|------|------|------|------|------|----|---------------|
| <i>GOLIM4</i>  | 0.42 | 0.00 | 0.00 | 0.40 | 0.20 | 10 | Myofibroblast |
| <i>SURF4</i>   | 0.37 | 0.00 | 0.00 | 0.32 | 0.15 | 10 | Myofibroblast |
| <i>MXRA8</i>   | 0.34 | 0.00 | 0.00 | 0.36 | 0.17 | 10 | Myofibroblast |
| <i>SSR4</i>    | 0.39 | 0.00 | 0.00 | 0.48 | 0.27 | 10 | Myofibroblast |
| <i>P4HB</i>    | 0.39 | 0.00 | 0.00 | 0.64 | 0.41 | 10 | Myofibroblast |
| <i>ANXA2</i>   | 0.42 | 0.00 | 0.00 | 0.70 | 0.49 | 10 | Myofibroblast |
| <i>TSPAN3</i>  | 0.43 | 0.00 | 0.00 | 0.34 | 0.17 | 10 | Myofibroblast |
| <i>CRYAB</i>   | 0.37 | 0.00 | 0.00 | 0.33 | 0.16 | 10 | Myofibroblast |
| <i>OST4</i>    | 0.42 | 0.00 | 0.00 | 0.49 | 0.28 | 10 | Myofibroblast |
| <i>LAMC1</i>   | 0.38 | 0.00 | 0.00 | 0.33 | 0.16 | 10 | Myofibroblast |
| <i>CD81</i>    | 0.37 | 0.00 | 0.00 | 0.63 | 0.40 | 10 | Myofibroblast |
| <i>LAMA4</i>   | 0.45 | 0.00 | 0.00 | 0.29 | 0.13 | 10 | Myofibroblast |
| <i>TPPP3</i>   | 0.66 | 0.00 | 0.00 | 0.29 | 0.14 | 10 | Myofibroblast |
| <i>RBPJ</i>    | 0.37 | 0.00 | 0.00 | 0.26 | 0.12 | 10 | Myofibroblast |
| <i>ERLEC1</i>  | 0.39 | 0.00 | 0.00 | 0.32 | 0.15 | 10 | Myofibroblast |
| <i>TUBA1B</i>  | 0.41 | 0.00 | 0.00 | 0.68 | 0.46 | 10 | Myofibroblast |
| <i>GSTP1</i>   | 0.41 | 0.00 | 0.00 | 0.43 | 0.24 | 10 | Myofibroblast |
| <i>FMO2</i>    | 0.32 | 0.00 | 0.00 | 0.30 | 0.15 | 10 | Myofibroblast |
| <i>RPL29</i>   | 0.71 | 0.00 | 0.00 | 0.35 | 0.19 | 10 | Myofibroblast |
| <i>NBEAL1</i>  | 0.47 | 0.00 | 0.00 | 0.27 | 0.13 | 10 | Myofibroblast |
| <i>GRB10</i>   | 0.39 | 0.00 | 0.00 | 0.30 | 0.15 | 10 | Myofibroblast |
| <i>DDOST</i>   | 0.37 | 0.00 | 0.00 | 0.37 | 0.19 | 10 | Myofibroblast |
| <i>TCEAL8</i>  | 0.38 | 0.00 | 0.00 | 0.39 | 0.21 | 10 | Myofibroblast |
| <i>CELF2</i>   | 0.32 | 0.00 | 0.00 | 0.47 | 0.27 | 10 | Myofibroblast |
| <i>PHPT1</i>   | 0.37 | 0.00 | 0.00 | 0.27 | 0.13 | 10 | Myofibroblast |
| <i>ILK</i>     | 0.34 | 0.00 | 0.00 | 0.43 | 0.24 | 10 | Myofibroblast |
| <i>MRFAP1</i>  | 0.36 | 0.00 | 0.00 | 0.56 | 0.35 | 10 | Myofibroblast |
| <i>SVIL</i>    | 0.39 | 0.00 | 0.00 | 0.32 | 0.16 | 10 | Myofibroblast |
| <i>PDLIM2</i>  | 0.35 | 0.00 | 0.00 | 0.35 | 0.18 | 10 | Myofibroblast |
| <i>KDELR1</i>  | 0.36 | 0.00 | 0.00 | 0.32 | 0.16 | 10 | Myofibroblast |
| <i>PLS3</i>    | 0.36 | 0.00 | 0.00 | 0.39 | 0.22 | 10 | Myofibroblast |
| <i>NUCB1</i>   | 0.30 | 0.00 | 0.00 | 0.31 | 0.16 | 10 | Myofibroblast |
| <i>PDLIM7</i>  | 0.31 | 0.00 | 0.00 | 0.26 | 0.12 | 10 | Myofibroblast |
| <i>GAS6</i>    | 0.69 | 0.00 | 0.00 | 0.30 | 0.16 | 10 | Myofibroblast |
| <i>SEC61A1</i> | 0.34 | 0.00 | 0.00 | 0.31 | 0.16 | 10 | Myofibroblast |
| <i>CALR</i>    | 0.33 | 0.00 | 0.00 | 0.66 | 0.45 | 10 | Myofibroblast |
| <i>GPM6B</i>   | 0.40 | 0.00 | 0.00 | 0.26 | 0.13 | 10 | Myofibroblast |
| <i>RPL24</i>   | 0.41 | 0.00 | 0.00 | 0.67 | 0.49 | 10 | Myofibroblast |
| <i>ZFP36L1</i> | 0.32 | 0.00 | 0.00 | 0.67 | 0.46 | 10 | Myofibroblast |
| <i>RPL7A</i>   | 0.53 | 0.00 | 0.00 | 0.60 | 0.43 | 10 | Myofibroblast |
| <i>THBS1</i>   | 0.25 | 0.00 | 0.00 | 0.26 | 0.13 | 10 | Myofibroblast |
| <i>SAR1A</i>   | 0.32 | 0.00 | 0.00 | 0.37 | 0.21 | 10 | Myofibroblast |
| <i>TMED9</i>   | 0.35 | 0.00 | 0.00 | 0.46 | 0.28 | 10 | Myofibroblast |

|                |      |      |      |      |      |    |               |
|----------------|------|------|------|------|------|----|---------------|
| <i>RPN2</i>    | 0.30 | 0.00 | 0.00 | 0.38 | 0.21 | 10 | Myofibroblast |
| <i>SERF2</i>   | 0.28 | 0.00 | 0.00 | 0.77 | 0.60 | 10 | Myofibroblast |
| <i>CNPY2</i>   | 0.31 | 0.00 | 0.00 | 0.37 | 0.20 | 10 | Myofibroblast |
| <i>CBX5</i>    | 0.42 | 0.00 | 0.00 | 0.40 | 0.24 | 10 | Myofibroblast |
| <i>EEF1D</i>   | 0.44 | 0.00 | 0.00 | 0.47 | 0.30 | 10 | Myofibroblast |
| <i>YIPF5</i>   | 0.30 | 0.00 | 0.00 | 0.27 | 0.14 | 10 | Myofibroblast |
| <i>COPB2</i>   | 0.35 | 0.00 | 0.00 | 0.32 | 0.18 | 10 | Myofibroblast |
| <i>ATRAID</i>  | 0.29 | 0.00 | 0.00 | 0.34 | 0.19 | 10 | Myofibroblast |
| <i>COMT</i>    | 0.30 | 0.00 | 0.00 | 0.30 | 0.16 | 10 | Myofibroblast |
| <i>HMCN1</i>   | 0.34 | 0.00 | 0.00 | 0.27 | 0.13 | 10 | Myofibroblast |
| <i>KANK2</i>   | 0.33 | 0.00 | 0.00 | 0.26 | 0.13 | 10 | Myofibroblast |
| <i>LRPAP1</i>  | 0.32 | 0.00 | 0.00 | 0.31 | 0.17 | 10 | Myofibroblast |
| <i>SSR2</i>    | 0.35 | 0.00 | 0.00 | 0.52 | 0.34 | 10 | Myofibroblast |
| <i>SFR1</i>    | 0.40 | 0.00 | 0.00 | 0.47 | 0.30 | 10 | Myofibroblast |
| <i>PDIA6</i>   | 0.31 | 0.00 | 0.00 | 0.51 | 0.32 | 10 | Myofibroblast |
| <i>REXO2</i>   | 0.30 | 0.00 | 0.00 | 0.28 | 0.15 | 10 | Myofibroblast |
| <i>NFIC</i>    | 0.34 | 0.00 | 0.00 | 0.41 | 0.25 | 10 | Myofibroblast |
| <i>CAV1</i>    | 0.31 | 0.00 | 0.00 | 0.58 | 0.37 | 10 | Myofibroblast |
| <i>TTC3</i>    | 0.25 | 0.00 | 0.00 | 0.48 | 0.29 | 10 | Myofibroblast |
| <i>GAPDH</i>   | 0.41 | 0.00 | 0.00 | 0.33 | 0.19 | 10 | Myofibroblast |
| <i>DAAM1</i>   | 0.37 | 0.00 | 0.00 | 0.30 | 0.16 | 10 | Myofibroblast |
| <i>NUCKS1</i>  | 0.37 | 0.00 | 0.00 | 0.45 | 0.29 | 10 | Myofibroblast |
| <i>CD164</i>   | 0.31 | 0.00 | 0.00 | 0.29 | 0.16 | 10 | Myofibroblast |
| <i>CAMK2N1</i> | 0.30 | 0.00 | 0.00 | 0.27 | 0.14 | 10 | Myofibroblast |
| <i>HNRNPA1</i> | 0.58 | 0.00 | 0.00 | 0.45 | 0.31 | 10 | Myofibroblast |
| <i>SEPT7</i>   | 0.26 | 0.00 | 0.00 | 0.77 | 0.59 | 10 | Myofibroblast |
| <i>RTN4</i>    | 0.26 | 0.00 | 0.00 | 0.43 | 0.26 | 10 | Myofibroblast |
| <i>BSG</i>     | 0.30 | 0.00 | 0.00 | 0.58 | 0.39 | 10 | Myofibroblast |
| <i>GNAS</i>    | 0.32 | 0.00 | 0.00 | 0.80 | 0.66 | 10 | Myofibroblast |
| <i>HSPB1</i>   | 0.45 | 0.00 | 0.00 | 0.30 | 0.17 | 10 | Myofibroblast |
| <i>HCFC1R1</i> | 0.29 | 0.00 | 0.00 | 0.27 | 0.15 | 10 | Myofibroblast |
| <i>AP2M1</i>   | 0.33 | 0.00 | 0.00 | 0.30 | 0.17 | 10 | Myofibroblast |
| <i>ERGIC3</i>  | 0.25 | 0.00 | 0.00 | 0.30 | 0.17 | 10 | Myofibroblast |
| <i>CCNI</i>    | 0.48 | 0.00 | 0.00 | 0.32 | 0.20 | 10 | Myofibroblast |
| <i>ZFP36L2</i> | 0.49 | 0.00 | 0.00 | 0.25 | 0.14 | 10 | Myofibroblast |
| <i>TMED2</i>   | 0.30 | 0.00 | 0.00 | 0.41 | 0.26 | 10 | Myofibroblast |
| <i>COPE</i>    | 0.25 | 0.00 | 0.00 | 0.40 | 0.25 | 10 | Myofibroblast |
| <i>PARVA</i>   | 0.26 | 0.00 | 0.00 | 0.28 | 0.16 | 10 | Myofibroblast |
| <i>PDIA3</i>   | 0.27 | 0.00 | 0.00 | 0.63 | 0.46 | 10 | Myofibroblast |
| <i>RPL36A</i>  | 0.27 | 0.00 | 0.00 | 0.78 | 0.64 | 10 | Myofibroblast |
| <i>BFAR</i>    | 0.28 | 0.00 | 0.00 | 0.25 | 0.14 | 10 | Myofibroblast |
| <i>RPL13A</i>  | 0.65 | 0.00 | 0.00 | 0.70 | 0.59 | 10 | Myofibroblast |
| <i>KRTCAP2</i> | 0.26 | 0.00 | 0.00 | 0.45 | 0.30 | 10 | Myofibroblast |

|                 |      |      |      |      |      |    |               |
|-----------------|------|------|------|------|------|----|---------------|
| <i>HSPA5</i>    | 0.29 | 0.00 | 0.00 | 0.70 | 0.55 | 10 | Myofibroblast |
| <i>TRMT112</i>  | 0.27 | 0.00 | 0.00 | 0.29 | 0.18 | 10 | Myofibroblast |
| <i>LIMA1</i>    | 0.28 | 0.00 | 0.00 | 0.26 | 0.15 | 10 | Myofibroblast |
| <i>CNN3</i>     | 0.28 | 0.00 | 0.00 | 0.47 | 0.33 | 10 | Myofibroblast |
| <i>MIF</i>      | 0.27 | 0.00 | 0.00 | 0.35 | 0.23 | 10 | Myofibroblast |
| <i>CIRBP</i>    | 0.33 | 0.00 | 0.00 | 0.38 | 0.26 | 10 | Myofibroblast |
| <i>C12orf57</i> | 0.29 | 0.00 | 0.00 | 0.27 | 0.16 | 10 | Myofibroblast |
| <i>NDUFS5</i>   | 0.29 | 0.00 | 0.00 | 0.39 | 0.27 | 10 | Myofibroblast |
| <i>HSP90B1</i>  | 0.40 | 0.00 | 0.00 | 0.83 | 0.75 | 10 | Myofibroblast |
| <i>CSRP2</i>    | 0.27 | 0.00 | 0.00 | 0.26 | 0.16 | 10 | Myofibroblast |
| <i>CRIP1</i>    | 0.59 | 0.00 | 0.00 | 0.60 | 0.47 | 10 | Myofibroblast |
| <i>SUMO2</i>    | 0.26 | 0.00 | 0.00 | 0.47 | 0.34 | 10 | Myofibroblast |
| <i>RPL23A</i>   | 0.25 | 0.00 | 0.00 | 0.79 | 0.69 | 10 | Myofibroblast |
| <i>ACTA2</i>    | 2.55 | 0.00 | 0.00 | 0.96 | 0.23 | 11 | Myofibroblast |
| <i>MYH11</i>    | 2.42 | 0.00 | 0.00 | 0.79 | 0.11 | 11 | Myofibroblast |
| <i>MYL9</i>     | 2.32 | 0.00 | 0.00 | 0.86 | 0.16 | 11 | Myofibroblast |
| <i>IGFBP5</i>   | 2.31 | 0.00 | 0.00 | 0.64 | 0.09 | 11 | Myofibroblast |
| <i>TPM2</i>     | 2.24 | 0.00 | 0.00 | 0.86 | 0.16 | 11 | Myofibroblast |
| <i>ACTC1</i>    | 2.19 | 0.00 | 0.00 | 0.36 | 0.02 | 11 | Myofibroblast |
| <i>TAGLN</i>    | 2.18 | 0.00 | 0.00 | 0.92 | 0.17 | 11 | Myofibroblast |
| <i>PI15</i>     | 2.11 | 0.00 | 0.00 | 0.44 | 0.03 | 11 | Myofibroblast |
| <i>GPC6</i>     | 1.92 | 0.00 | 0.00 | 0.41 | 0.01 | 11 | Myofibroblast |
| <i>ACTG2</i>    | 1.80 | 0.00 | 0.00 | 0.57 | 0.08 | 11 | Myofibroblast |
| <i>ELN</i>      | 1.66 | 0.00 | 0.00 | 0.75 | 0.17 | 11 | Myofibroblast |
| <i>SH3BGR</i>   | 1.62 | 0.00 | 0.00 | 0.29 | 0.01 | 11 | Myofibroblast |
| <i>CALD1</i>    | 1.61 | 0.00 | 0.00 | 0.95 | 0.43 | 11 | Myofibroblast |
| <i>CNN1</i>     | 1.49 | 0.00 | 0.00 | 0.38 | 0.03 | 11 | Myofibroblast |
| <i>MAP1B</i>    | 1.46 | 0.00 | 0.00 | 0.52 | 0.09 | 11 | Myofibroblast |
| <i>THSD4</i>    | 1.46 | 0.00 | 0.00 | 0.31 | 0.02 | 11 | Myofibroblast |
| <i>AOC3</i>     | 1.45 | 0.00 | 0.00 | 0.38 | 0.03 | 11 | Myofibroblast |
| <i>SOD3</i>     | 1.39 | 0.00 | 0.00 | 0.40 | 0.06 | 11 | Myofibroblast |
| <i>CPE</i>      | 1.33 | 0.00 | 0.00 | 0.33 | 0.03 | 11 | Myofibroblast |
| <i>NOTCH3</i>   | 1.30 | 0.00 | 0.00 | 0.36 | 0.03 | 11 | Myofibroblast |
| <i>CRISPLD2</i> | 1.22 | 0.00 | 0.00 | 0.30 | 0.03 | 11 | Myofibroblast |
| <i>NTRK3</i>    | 1.22 | 0.00 | 0.00 | 0.28 | 0.01 | 11 | Myofibroblast |
| <i>HEYL</i>     | 1.12 | 0.00 | 0.00 | 0.28 | 0.03 | 11 | Myofibroblast |
| <i>NDRG2</i>    | 1.28 | 0.00 | 0.00 | 0.47 | 0.08 | 11 | Myofibroblast |
| <i>PDGFRB</i>   | 1.21 | 0.00 | 0.00 | 0.40 | 0.06 | 11 | Myofibroblast |
| <i>IGFBP7</i>   | 1.33 | 0.00 | 0.00 | 0.92 | 0.42 | 11 | Myofibroblast |
| <i>TPM1</i>     | 1.59 | 0.00 | 0.00 | 0.95 | 0.51 | 11 | Myofibroblast |
| <i>MUSTN1</i>   | 1.52 | 0.00 | 0.00 | 0.38 | 0.07 | 11 | Myofibroblast |
| <i>LGALS1</i>   | 1.04 | 0.00 | 0.00 | 0.95 | 0.46 | 11 | Myofibroblast |
| <i>POSTN</i>    | 1.21 | 0.00 | 0.00 | 0.44 | 0.09 | 11 | Myofibroblast |

|                 |      |      |      |      |      |    |               |
|-----------------|------|------|------|------|------|----|---------------|
| <i>ITGA8</i>    | 1.50 | 0.00 | 0.00 | 0.43 | 0.09 | 11 | Myofibroblast |
| <i>FAM129A</i>  | 1.24 | 0.00 | 0.00 | 0.39 | 0.08 | 11 | Myofibroblast |
| <i>MYL6</i>     | 1.03 | 0.00 | 0.00 | 0.93 | 0.72 | 11 | Myofibroblast |
| <i>FXYD1</i>    | 1.04 | 0.00 | 0.00 | 0.42 | 0.10 | 11 | Myofibroblast |
| <i>COL1A2</i>   | 0.60 | 0.00 | 0.00 | 0.95 | 0.40 | 11 | Myofibroblast |
| <i>CRIP1</i>    | 1.16 | 0.00 | 0.00 | 0.84 | 0.47 | 11 | Myofibroblast |
| <i>CSRP2</i>    | 1.34 | 0.00 | 0.00 | 0.51 | 0.15 | 11 | Myofibroblast |
| <i>FSTL1</i>    | 1.09 | 0.00 | 0.00 | 0.84 | 0.45 | 11 | Myofibroblast |
| <i>CXCL12</i>   | 0.69 | 0.00 | 0.00 | 0.47 | 0.13 | 11 | Myofibroblast |
| <i>DSTN</i>     | 1.10 | 0.00 | 0.00 | 0.84 | 0.53 | 11 | Myofibroblast |
| <i>MGP</i>      | 0.91 | 0.00 | 0.00 | 0.79 | 0.33 | 11 | Myofibroblast |
| <i>MYLK</i>     | 1.15 | 0.00 | 0.00 | 0.70 | 0.29 | 11 | Myofibroblast |
| <i>FLNA</i>     | 1.06 | 0.00 | 0.00 | 0.61 | 0.24 | 11 | Myofibroblast |
| <i>FBLIM1</i>   | 1.24 | 0.00 | 0.00 | 0.49 | 0.16 | 11 | Myofibroblast |
| <i>TINAGL1</i>  | 0.99 | 0.00 | 0.00 | 0.42 | 0.12 | 11 | Myofibroblast |
| <i>SEMA5A</i>   | 0.97 | 0.00 | 0.00 | 0.28 | 0.06 | 11 | Myofibroblast |
| <i>PLS3</i>     | 1.00 | 0.00 | 0.00 | 0.55 | 0.21 | 11 | Myofibroblast |
| <i>ACTN1</i>    | 0.97 | 0.00 | 0.00 | 0.57 | 0.23 | 11 | Myofibroblast |
| <i>RASL12</i>   | 0.79 | 0.00 | 0.00 | 0.26 | 0.06 | 11 | Myofibroblast |
| <i>CRYAB</i>    | 0.88 | 0.00 | 0.00 | 0.46 | 0.16 | 11 | Myofibroblast |
| <i>DES</i>      | 0.98 | 0.00 | 0.00 | 0.27 | 0.06 | 11 | Myofibroblast |
| <i>PLAC9</i>    | 0.56 | 0.00 | 0.00 | 0.72 | 0.30 | 11 | Myofibroblast |
| <i>COL14A1</i>  | 1.02 | 0.00 | 0.00 | 0.26 | 0.06 | 11 | Myofibroblast |
| <i>RARRES2</i>  | 0.67 | 0.00 | 0.00 | 0.48 | 0.16 | 11 | Myofibroblast |
| <i>CCDC80</i>   | 0.86 | 0.00 | 0.00 | 0.39 | 0.12 | 11 | Myofibroblast |
| <i>COL1A1</i>   | 0.54 | 0.00 | 0.00 | 0.68 | 0.28 | 11 | Myofibroblast |
| <i>PTP4A3</i>   | 0.92 | 0.00 | 0.00 | 0.30 | 0.08 | 11 | Myofibroblast |
| <i>PRDM6</i>    | 0.78 | 0.00 | 0.00 | 0.27 | 0.07 | 11 | Myofibroblast |
| <i>CAV1</i>     | 0.71 | 0.00 | 0.00 | 0.75 | 0.36 | 11 | Myofibroblast |
| <i>HSPB1</i>    | 1.12 | 0.00 | 0.00 | 0.45 | 0.17 | 11 | Myofibroblast |
| <i>LOXL1</i>    | 0.90 | 0.00 | 0.00 | 0.36 | 0.11 | 11 | Myofibroblast |
| <i>PDLIM7</i>   | 0.83 | 0.00 | 0.00 | 0.37 | 0.12 | 11 | Myofibroblast |
| <i>STOM</i>     | 0.71 | 0.00 | 0.00 | 0.31 | 0.09 | 11 | Myofibroblast |
| <i>SLMAP</i>    | 0.93 | 0.00 | 0.00 | 0.40 | 0.14 | 11 | Myofibroblast |
| <i>NEXN</i>     | 0.66 | 0.00 | 0.00 | 0.53 | 0.21 | 11 | Myofibroblast |
| <i>MEF2C</i>    | 0.79 | 0.00 | 0.00 | 0.45 | 0.18 | 11 | Myofibroblast |
| <i>FILIP1L</i>  | 0.79 | 0.00 | 0.00 | 0.66 | 0.33 | 11 | Myofibroblast |
| <i>SPARC</i>    | 0.49 | 0.00 | 0.00 | 0.98 | 0.76 | 11 | Myofibroblast |
| <i>OLFML2B</i>  | 0.70 | 0.00 | 0.00 | 0.25 | 0.07 | 11 | Myofibroblast |
| <i>ILK</i>      | 0.76 | 0.00 | 0.00 | 0.52 | 0.23 | 11 | Myofibroblast |
| <i>DNAJB4</i>   | 1.00 | 0.00 | 0.00 | 0.31 | 0.10 | 11 | Myofibroblast |
| <i>PPP1R14A</i> | 0.68 | 0.00 | 0.00 | 0.33 | 0.11 | 11 | Myofibroblast |
| <i>C1orf198</i> | 0.77 | 0.00 | 0.00 | 0.28 | 0.08 | 11 | Myofibroblast |

|                 |      |      |      |      |      |    |               |
|-----------------|------|------|------|------|------|----|---------------|
| <i>PPP1R12A</i> | 0.86 | 0.00 | 0.00 | 0.55 | 0.26 | 11 | Myofibroblast |
| <i>BGN</i>      | 0.68 | 0.00 | 0.00 | 0.57 | 0.26 | 11 | Myofibroblast |
| <i>HCFC1R1</i>  | 0.86 | 0.00 | 0.00 | 0.38 | 0.14 | 11 | Myofibroblast |
| <i>ADAMTS2</i>  | 0.84 | 0.00 | 0.00 | 0.31 | 0.10 | 11 | Myofibroblast |
| <i>SMTN</i>     | 0.81 | 0.00 | 0.00 | 0.28 | 0.09 | 11 | Myofibroblast |
| <i>CD63</i>     | 0.61 | 0.00 | 0.00 | 0.65 | 0.34 | 11 | Myofibroblast |
| <i>VIM</i>      | 0.57 | 0.00 | 0.00 | 0.90 | 0.69 | 11 | Myofibroblast |
| <i>CTGF</i>     | 0.85 | 0.00 | 0.00 | 0.29 | 0.09 | 11 | Myofibroblast |
| <i>RBPMS</i>    | 0.81 | 0.00 | 0.00 | 0.42 | 0.18 | 11 | Myofibroblast |
| <i>MAGED2</i>   | 0.70 | 0.00 | 0.00 | 0.47 | 0.21 | 11 | Myofibroblast |
| <i>PDLIM1</i>   | 0.67 | 0.00 | 0.00 | 0.39 | 0.15 | 11 | Myofibroblast |
| <i>TGFB2</i>    | 0.93 | 0.00 | 0.00 | 0.35 | 0.13 | 11 | Myofibroblast |
| <i>PPP1CB</i>   | 0.72 | 0.00 | 0.00 | 0.45 | 0.20 | 11 | Myofibroblast |
| <i>NDN</i>      | 0.61 | 0.00 | 0.00 | 0.25 | 0.08 | 11 | Myofibroblast |
| <i>MCAM</i>     | 0.66 | 0.00 | 0.00 | 0.36 | 0.13 | 11 | Myofibroblast |
| <i>MSRB3</i>    | 0.67 | 0.00 | 0.00 | 0.28 | 0.09 | 11 | Myofibroblast |
| <i>TM4SF1</i>   | 0.53 | 0.00 | 0.00 | 0.49 | 0.22 | 11 | Myofibroblast |
| <i>FHL1</i>     | 0.32 | 0.00 | 0.00 | 0.62 | 0.30 | 11 | Myofibroblast |
| <i>RPLP1</i>    | 0.37 | 0.00 | 0.00 | 0.96 | 0.91 | 11 | Myofibroblast |
| <i>MFGE8</i>    | 0.62 | 0.00 | 0.00 | 0.39 | 0.17 | 11 | Myofibroblast |
| <i>ZFHX3</i>    | 0.71 | 0.00 | 0.00 | 0.39 | 0.17 | 11 | Myofibroblast |
| <i>MYH10</i>    | 0.65 | 0.00 | 0.00 | 0.48 | 0.22 | 11 | Myofibroblast |
| <i>CBX6</i>     | 0.65 | 0.00 | 0.00 | 0.29 | 0.11 | 11 | Myofibroblast |
| <i>NUPR1</i>    | 0.62 | 0.00 | 0.00 | 0.45 | 0.20 | 11 | Myofibroblast |
| <i>LMNA</i>     | 0.66 | 0.00 | 0.00 | 0.46 | 0.23 | 11 | Myofibroblast |
| <i>ITGA4</i>    | 0.70 | 0.00 | 0.00 | 0.26 | 0.09 | 11 | Myofibroblast |
| <i>TGFB1/1</i>  | 0.64 | 0.00 | 0.00 | 0.36 | 0.15 | 11 | Myofibroblast |
| <i>MGST3</i>    | 0.75 | 0.00 | 0.00 | 0.32 | 0.13 | 11 | Myofibroblast |
| <i>MT-CYB</i>   | 0.37 | 0.00 | 0.00 | 0.95 | 0.83 | 11 | Myofibroblast |
| <i>CKB</i>      | 0.67 | 0.00 | 0.00 | 0.33 | 0.14 | 11 | Myofibroblast |
| <i>MT-ND4</i>   | 0.50 | 0.00 | 0.00 | 0.89 | 0.76 | 11 | Myofibroblast |
| <i>CST3</i>     | 0.42 | 0.00 | 0.00 | 0.81 | 0.59 | 11 | Myofibroblast |
| <i>MIF</i>      | 0.61 | 0.00 | 0.00 | 0.45 | 0.23 | 11 | Myofibroblast |
| <i>ANTXR1</i>   | 0.62 | 0.00 | 0.00 | 0.31 | 0.13 | 11 | Myofibroblast |
| <i>EID1</i>     | 0.54 | 0.00 | 0.00 | 0.57 | 0.32 | 11 | Myofibroblast |
| <i>MT-CO3</i>   | 0.33 | 0.00 | 0.00 | 0.96 | 0.89 | 11 | Myofibroblast |
| <i>EEF1D</i>    | 0.69 | 0.00 | 0.00 | 0.51 | 0.30 | 11 | Myofibroblast |
| <i>RPL10A</i>   | 0.43 | 0.00 | 0.00 | 0.88 | 0.76 | 11 | Myofibroblast |
| <i>RCN3</i>     | 0.59 | 0.00 | 0.00 | 0.30 | 0.13 | 11 | Myofibroblast |
| <i>SH3BGRL</i>  | 0.38 | 0.00 | 0.00 | 0.72 | 0.45 | 11 | Myofibroblast |
| <i>GSN</i>      | 0.32 | 0.00 | 0.00 | 0.48 | 0.25 | 11 | Myofibroblast |
| <i>MT-ND3</i>   | 0.65 | 0.00 | 0.00 | 0.68 | 0.51 | 11 | Myofibroblast |
| <i>RAB34</i>    | 0.50 | 0.00 | 0.00 | 0.26 | 0.10 | 11 | Myofibroblast |

|                 |      |      |      |      |      |    |               |
|-----------------|------|------|------|------|------|----|---------------|
| <i>HNRNPA1</i>  | 0.79 | 0.00 | 0.00 | 0.49 | 0.31 | 11 | Myofibroblast |
| <i>NENF</i>     | 0.50 | 0.00 | 0.00 | 0.40 | 0.20 | 11 | Myofibroblast |
| <i>SERPINE2</i> | 0.44 | 0.00 | 0.00 | 0.47 | 0.25 | 11 | Myofibroblast |
| <i>CD81</i>     | 0.55 | 0.00 | 0.00 | 0.61 | 0.40 | 11 | Myofibroblast |
| <i>NFIA</i>     | 0.62 | 0.00 | 0.00 | 0.44 | 0.24 | 11 | Myofibroblast |
| <i>CNN3</i>     | 0.47 | 0.00 | 0.00 | 0.55 | 0.32 | 11 | Myofibroblast |
| <i>FBN1</i>     | 0.52 | 0.00 | 0.00 | 0.35 | 0.17 | 11 | Myofibroblast |
| <i>TPPP3</i>    | 0.67 | 0.00 | 0.00 | 0.30 | 0.14 | 11 | Myofibroblast |
| <i>SLC25A4</i>  | 0.64 | 0.00 | 0.00 | 0.63 | 0.47 | 11 | Myofibroblast |
| <i>GAPDH</i>    | 0.85 | 0.00 | 0.00 | 0.36 | 0.19 | 11 | Myofibroblast |
| <i>NUDT4</i>    | 0.50 | 0.00 | 0.00 | 0.33 | 0.16 | 11 | Myofibroblast |
| <i>VCL</i>      | 0.58 | 0.00 | 0.00 | 0.30 | 0.14 | 11 | Myofibroblast |
| <i>EIF3L</i>    | 0.52 | 0.00 | 0.00 | 0.33 | 0.16 | 11 | Myofibroblast |
| <i>TSPAN3</i>   | 0.50 | 0.00 | 0.00 | 0.34 | 0.17 | 11 | Myofibroblast |
| <i>PBXIP1</i>   | 0.56 | 0.00 | 0.00 | 0.30 | 0.14 | 11 | Myofibroblast |
| <i>APOE</i>     | 0.33 | 0.00 | 0.00 | 0.47 | 0.27 | 11 | Myofibroblast |
| <i>RPS4X</i>    | 0.35 | 0.00 | 0.00 | 0.95 | 0.88 | 11 | Myofibroblast |
| <i>RPL29</i>    | 1.05 | 0.00 | 0.00 | 0.35 | 0.19 | 11 | Myofibroblast |
| <i>NACA</i>     | 0.40 | 0.00 | 0.00 | 0.76 | 0.61 | 11 | Myofibroblast |
| <i>IMPDH2</i>   | 0.47 | 0.00 | 0.00 | 0.26 | 0.11 | 11 | Myofibroblast |
| <i>RHOJ</i>     | 0.52 | 0.00 | 0.00 | 0.35 | 0.18 | 11 | Myofibroblast |
| <i>EEF2</i>     | 0.48 | 0.00 | 0.00 | 0.73 | 0.59 | 11 | Myofibroblast |
| <i>GSTP1</i>    | 0.56 | 0.00 | 0.00 | 0.42 | 0.24 | 11 | Myofibroblast |
| <i>CDC42EP3</i> | 0.69 | 0.00 | 0.00 | 0.28 | 0.13 | 11 | Myofibroblast |
| <i>RBMX</i>     | 0.51 | 0.00 | 0.00 | 0.28 | 0.14 | 11 | Myofibroblast |
| <i>SERPINH1</i> | 0.42 | 0.00 | 0.00 | 0.63 | 0.41 | 11 | Myofibroblast |
| <i>SEPT7</i>    | 0.41 | 0.00 | 0.00 | 0.76 | 0.59 | 11 | Myofibroblast |
| <i>EIF4A2</i>   | 0.47 | 0.00 | 0.00 | 0.53 | 0.35 | 11 | Myofibroblast |
| <i>TUBA1A</i>   | 0.41 | 0.00 | 0.00 | 0.70 | 0.52 | 11 | Myofibroblast |
| <i>NDUFS5</i>   | 0.49 | 0.00 | 0.00 | 0.43 | 0.27 | 11 | Myofibroblast |
| <i>CYR61</i>    | 0.45 | 0.00 | 0.00 | 0.26 | 0.12 | 11 | Myofibroblast |
| <i>NR2F2</i>    | 0.48 | 0.00 | 0.00 | 0.38 | 0.21 | 11 | Myofibroblast |
| <i>KANK2</i>    | 0.45 | 0.00 | 0.00 | 0.27 | 0.13 | 11 | Myofibroblast |
| <i>DAAM1</i>    | 0.61 | 0.00 | 0.00 | 0.31 | 0.16 | 11 | Myofibroblast |
| <i>CFL2</i>     | 0.50 | 0.00 | 0.00 | 0.40 | 0.23 | 11 | Myofibroblast |
| <i>RPL8</i>     | 0.34 | 0.00 | 0.00 | 0.89 | 0.81 | 11 | Myofibroblast |
| <i>MT-ND2</i>   | 0.31 | 0.00 | 0.00 | 0.84 | 0.71 | 11 | Myofibroblast |
| <i>TSC22D1</i>  | 0.46 | 0.00 | 0.00 | 0.53 | 0.35 | 11 | Myofibroblast |
| <i>RPL7</i>     | 0.52 | 0.00 | 0.00 | 0.85 | 0.77 | 11 | Myofibroblast |
| <i>MT-CO2</i>   | 0.31 | 0.00 | 0.00 | 0.88 | 0.79 | 11 | Myofibroblast |
| <i>RPL23A</i>   | 0.49 | 0.00 | 0.00 | 0.80 | 0.69 | 11 | Myofibroblast |
| <i>CCNI</i>     | 0.70 | 0.00 | 0.00 | 0.34 | 0.20 | 11 | Myofibroblast |
| <i>SERF2</i>    | 0.32 | 0.00 | 0.00 | 0.75 | 0.60 | 11 | Myofibroblast |

|                 |      |      |      |      |      |    |               |
|-----------------|------|------|------|------|------|----|---------------|
| <i>ZBTB38</i>   | 0.53 | 0.00 | 0.00 | 0.27 | 0.13 | 11 | Myofibroblast |
| <i>RSU1</i>     | 0.46 | 0.00 | 0.00 | 0.36 | 0.20 | 11 | Myofibroblast |
| <i>PPIA</i>     | 0.51 | 0.00 | 0.00 | 0.36 | 0.21 | 11 | Myofibroblast |
| <i>THRA</i>     | 0.46 | 0.00 | 0.00 | 0.31 | 0.17 | 11 | Myofibroblast |
| <i>ITGB1</i>    | 0.32 | 0.00 | 0.00 | 0.83 | 0.64 | 11 | Myofibroblast |
| <i>TIMP2</i>    | 0.43 | 0.00 | 0.00 | 0.38 | 0.22 | 11 | Myofibroblast |
| <i>TUBA1B</i>   | 0.40 | 0.00 | 0.00 | 0.63 | 0.47 | 11 | Myofibroblast |
| <i>CSRP1</i>    | 0.43 | 0.00 | 0.00 | 0.35 | 0.19 | 11 | Myofibroblast |
| <i>ACADM</i>    | 0.50 | 0.00 | 0.00 | 0.26 | 0.13 | 11 | Myofibroblast |
| <i>CAV2</i>     | 0.31 | 0.00 | 0.00 | 0.39 | 0.22 | 11 | Myofibroblast |
| <i>RHOC</i>     | 0.35 | 0.00 | 0.00 | 0.41 | 0.24 | 11 | Myofibroblast |
| <i>NBEAL1</i>   | 0.40 | 0.00 | 0.00 | 0.25 | 0.13 | 11 | Myofibroblast |
| <i>DST</i>      | 0.39 | 0.00 | 0.00 | 0.29 | 0.16 | 11 | Myofibroblast |
| <i>ANXA5</i>    | 0.34 | 0.00 | 0.00 | 0.60 | 0.43 | 11 | Myofibroblast |
| <i>BTBD3</i>    | 0.56 | 0.00 | 0.00 | 0.26 | 0.14 | 11 | Myofibroblast |
| <i>RTN4</i>     | 0.37 | 0.00 | 0.00 | 0.43 | 0.26 | 11 | Myofibroblast |
| <i>SNRPD2</i>   | 0.36 | 0.00 | 0.00 | 0.44 | 0.28 | 11 | Myofibroblast |
| <i>COX7C</i>    | 0.31 | 0.00 | 0.00 | 0.77 | 0.64 | 11 | Myofibroblast |
| <i>TNS1</i>     | 0.32 | 0.00 | 0.00 | 0.38 | 0.23 | 11 | Myofibroblast |
| <i>LOXL2</i>    | 0.36 | 0.00 | 0.00 | 0.26 | 0.13 | 11 | Myofibroblast |
| <i>CALU</i>     | 0.40 | 0.00 | 0.00 | 0.40 | 0.25 | 11 | Myofibroblast |
| <i>CIRBP</i>    | 0.62 | 0.00 | 0.00 | 0.38 | 0.26 | 11 | Myofibroblast |
| <i>MRFAP1</i>   | 0.39 | 0.00 | 0.00 | 0.51 | 0.35 | 11 | Myofibroblast |
| <i>C12orf57</i> | 0.39 | 0.00 | 0.00 | 0.29 | 0.16 | 11 | Myofibroblast |
| <i>MT-ND4L</i>  | 0.35 | 0.00 | 0.00 | 0.55 | 0.39 | 11 | Myofibroblast |
| <i>MT-ND5</i>   | 0.29 | 0.00 | 0.00 | 0.88 | 0.75 | 11 | Myofibroblast |
| <i>TPM4</i>     | 0.37 | 0.00 | 0.00 | 0.67 | 0.51 | 11 | Myofibroblast |
| <i>S100A11</i>  | 0.33 | 0.00 | 0.00 | 0.66 | 0.50 | 11 | Myofibroblast |
| <i>NET1</i>     | 0.52 | 0.00 | 0.00 | 0.28 | 0.16 | 11 | Myofibroblast |
| <i>RPL7A</i>    | 0.64 | 0.00 | 0.00 | 0.54 | 0.44 | 11 | Myofibroblast |
| <i>ALDOA</i>    | 0.41 | 0.00 | 0.00 | 0.36 | 0.23 | 11 | Myofibroblast |
| <i>CALM2</i>    | 0.31 | 0.00 | 0.00 | 0.77 | 0.66 | 11 | Myofibroblast |
| <i>COL6A1</i>   | 0.28 | 0.00 | 0.00 | 0.38 | 0.22 | 11 | Myofibroblast |
| <i>OGN</i>      | 0.43 | 0.00 | 0.00 | 0.25 | 0.14 | 11 | Myofibroblast |
| <i>RHEB</i>     | 0.38 | 0.00 | 0.00 | 0.33 | 0.20 | 11 | Myofibroblast |
| <i>SUMO2</i>    | 0.39 | 0.00 | 0.00 | 0.48 | 0.34 | 11 | Myofibroblast |
| <i>UQCRB</i>    | 0.32 | 0.00 | 0.00 | 0.61 | 0.47 | 11 | Myofibroblast |
| <i>COL6A2</i>   | 0.27 | 0.00 | 0.00 | 0.32 | 0.18 | 11 | Myofibroblast |
| <i>ECH1</i>     | 0.38 | 0.00 | 0.00 | 0.30 | 0.17 | 11 | Myofibroblast |
| <i>COMMD6</i>   | 0.48 | 0.00 | 0.00 | 0.28 | 0.16 | 11 | Myofibroblast |
| <i>AP2M1</i>    | 0.37 | 0.00 | 0.00 | 0.30 | 0.17 | 11 | Myofibroblast |
| <i>TOMM7</i>    | 0.32 | 0.00 | 0.00 | 0.55 | 0.40 | 11 | Myofibroblast |
| <i>COX5B</i>    | 0.33 | 0.00 | 0.00 | 0.54 | 0.40 | 11 | Myofibroblast |

|                 |      |      |      |      |      |    |               |
|-----------------|------|------|------|------|------|----|---------------|
| <i>PTMA</i>     | 0.28 | 0.00 | 0.00 | 0.96 | 0.92 | 11 | Myofibroblast |
| <i>IDH2</i>     | 0.41 | 0.00 | 0.00 | 0.32 | 0.20 | 11 | Myofibroblast |
| <i>EIF1AX</i>   | 0.34 | 0.00 | 0.00 | 0.35 | 0.22 | 11 | Myofibroblast |
| <i>MPRIP</i>    | 0.36 | 0.00 | 0.00 | 0.33 | 0.20 | 11 | Myofibroblast |
| <i>MAP1LC3A</i> | 0.33 | 0.00 | 0.00 | 0.33 | 0.21 | 11 | Myofibroblast |
| <i>ADAMTS1</i>  | 0.38 | 0.00 | 0.00 | 0.32 | 0.20 | 11 | Myofibroblast |
| <i>ESD</i>      | 0.35 | 0.00 | 0.00 | 0.35 | 0.23 | 11 | Myofibroblast |
| <i>DYNLL1</i>   | 0.27 | 0.00 | 0.00 | 0.62 | 0.47 | 11 | Myofibroblast |
| <i>EIF4B</i>    | 0.33 | 0.00 | 0.00 | 0.31 | 0.19 | 11 | Myofibroblast |
| <i>ANXA6</i>    | 0.31 | 0.00 | 0.00 | 0.35 | 0.22 | 11 | Myofibroblast |
| <i>HMGNI</i>    | 0.31 | 0.00 | 0.00 | 0.60 | 0.46 | 11 | Myofibroblast |
| <i>OAZ2</i>     | 0.33 | 0.00 | 0.00 | 0.44 | 0.30 | 11 | Myofibroblast |
| <i>RPL13A</i>   | 0.81 | 0.00 | 0.00 | 0.66 | 0.59 | 11 | Myofibroblast |
| <i>SPARCL1</i>  | 0.42 | 0.00 | 0.00 | 0.55 | 0.41 | 11 | Myofibroblast |
| <i>NUCKS1</i>   | 0.28 | 0.00 | 0.00 | 0.43 | 0.29 | 11 | Myofibroblast |
| <i>GOLIM4</i>   | 0.31 | 0.00 | 0.00 | 0.33 | 0.20 | 11 | Myofibroblast |
| <i>UQCR11</i>   | 0.28 | 0.00 | 0.00 | 0.46 | 0.32 | 11 | Myofibroblast |
| <i>RCN2</i>     | 0.26 | 0.00 | 0.00 | 0.28 | 0.17 | 11 | Myofibroblast |
| <i>ZYX</i>      | 0.28 | 0.00 | 0.00 | 0.33 | 0.21 | 11 | Myofibroblast |
| <i>RBMS3</i>    | 0.32 | 0.00 | 0.00 | 0.29 | 0.18 | 11 | Myofibroblast |
| <i>C11orf58</i> | 0.27 | 0.00 | 0.00 | 0.44 | 0.31 | 11 | Myofibroblast |
| <i>PGRMC1</i>   | 0.33 | 0.00 | 0.00 | 0.31 | 0.19 | 11 | Myofibroblast |
| <i>PARK7</i>    | 0.29 | 0.00 | 0.00 | 0.41 | 0.28 | 11 | Myofibroblast |
| <i>ENO1</i>     | 0.26 | 0.00 | 0.00 | 0.30 | 0.19 | 11 | Myofibroblast |
| <i>CCT3</i>     | 0.30 | 0.00 | 0.00 | 0.29 | 0.18 | 11 | Myofibroblast |
| <i>CUTA</i>     | 0.28 | 0.00 | 0.00 | 0.32 | 0.20 | 11 | Myofibroblast |
| <i>MORF4L2</i>  | 0.31 | 0.00 | 0.00 | 0.35 | 0.24 | 11 | Myofibroblast |
| <i>EDF1</i>     | 0.28 | 0.00 | 0.00 | 0.46 | 0.34 | 11 | Myofibroblast |
| <i>RPS27A</i>   | 0.35 | 0.00 | 0.00 | 0.83 | 0.78 | 11 | Myofibroblast |
| <i>NDUFV3</i>   | 0.41 | 0.00 | 0.00 | 0.33 | 0.23 | 11 | Myofibroblast |
| <i>EIF3E</i>    | 0.27 | 0.00 | 0.00 | 0.54 | 0.43 | 11 | Myofibroblast |
| <i>MMP14</i>    | 0.28 | 0.00 | 0.00 | 0.36 | 0.25 | 11 | Myofibroblast |
| <i>SIVA1</i>    | 0.25 | 0.00 | 0.00 | 0.25 | 0.16 | 11 | Myofibroblast |
| <i>NDUFB4</i>   | 0.25 | 0.00 | 0.00 | 0.37 | 0.26 | 11 | Myofibroblast |
| <i>FBLN5</i>    | 0.41 | 0.00 | 0.00 | 0.27 | 0.18 | 11 | Myofibroblast |
| <i>CNN2</i>     | 0.29 | 0.00 | 0.00 | 0.49 | 0.39 | 11 | Myofibroblast |
| <i>ZFP36L1</i>  | 0.26 | 0.00 | 0.00 | 0.58 | 0.46 | 11 | Myofibroblast |
| <i>KLF9</i>     | 0.32 | 0.00 | 0.00 | 0.25 | 0.17 | 11 | Myofibroblast |
| <i>ISCU</i>     | 0.26 | 0.00 | 0.00 | 0.26 | 0.17 | 11 | Myofibroblast |
| <i>TCEAL8</i>   | 0.29 | 0.00 | 0.00 | 0.30 | 0.21 | 11 | Myofibroblast |
| <i>RPS13</i>    | 0.29 | 0.00 | 0.00 | 0.73 | 0.67 | 11 | Myofibroblast |
| <i>NDUFA4</i>   | 0.30 | 0.00 | 0.00 | 0.63 | 0.57 | 11 | Myofibroblast |
| <i>HSPD1</i>    | 0.28 | 0.00 | 0.00 | 0.35 | 0.26 | 11 | Myofibroblast |

|                 |      |      |      |      |      |    |               |
|-----------------|------|------|------|------|------|----|---------------|
| <i>PPDPF</i>    | 0.32 | 0.00 | 0.00 | 0.31 | 0.23 | 11 | Myofibroblast |
| <i>EIF2A</i>    | 0.26 | 0.00 | 0.00 | 0.26 | 0.18 | 11 | Myofibroblast |
| <i>SRP14</i>    | 0.30 | 0.00 | 0.00 | 0.41 | 0.34 | 11 | Myofibroblast |
| <i>RPL24</i>    | 0.38 | 0.00 | 0.00 | 0.54 | 0.50 | 11 | Myofibroblast |
| <i>HTATSF1</i>  | 0.26 | 0.00 | 0.00 | 0.33 | 0.25 | 11 | Myofibroblast |
| <i>TUBA1C</i>   | 0.27 | 0.00 | 0.00 | 0.37 | 0.29 | 11 | Myofibroblast |
| <i>HIGD1B</i>   | 3.13 | 0.00 | 0.00 | 0.87 | 0.02 | 12 | Pericyte      |
| <i>COX4I2</i>   | 2.83 | 0.00 | 0.00 | 0.84 | 0.02 | 12 | Pericyte      |
| <i>POSTN</i>    | 2.69 | 0.00 | 0.00 | 0.70 | 0.09 | 12 | Pericyte      |
| <i>FAM162B</i>  | 2.57 | 0.00 | 0.00 | 0.60 | 0.02 | 12 | Pericyte      |
| <i>NDUFA4L2</i> | 2.49 | 0.00 | 0.00 | 0.67 | 0.02 | 12 | Pericyte      |
| <i>PDGFRB</i>   | 2.48 | 0.00 | 0.00 | 0.80 | 0.05 | 12 | Pericyte      |
| <i>PCDH18</i>   | 2.25 | 0.00 | 0.00 | 0.60 | 0.03 | 12 | Pericyte      |
| <i>ITM2A</i>    | 2.07 | 0.00 | 0.00 | 0.52 | 0.07 | 12 | Pericyte      |
| <i>PDZD2</i>    | 1.99 | 0.00 | 0.00 | 0.49 | 0.02 | 12 | Pericyte      |
| <i>PDE5A</i>    | 1.99 | 0.00 | 0.00 | 0.61 | 0.11 | 12 | Pericyte      |
| <i>ITGA1</i>    | 1.88 | 0.00 | 0.00 | 0.67 | 0.10 | 12 | Pericyte      |
| <i>LIPG</i>     | 1.83 | 0.00 | 0.00 | 0.33 | 0.01 | 12 | Pericyte      |
| <i>RGS5</i>     | 1.80 | 0.00 | 0.00 | 0.44 | 0.05 | 12 | Pericyte      |
| <i>TRPC6</i>    | 1.79 | 0.00 | 0.00 | 0.46 | 0.01 | 12 | Pericyte      |
| <i>CHN1</i>     | 1.78 | 0.00 | 0.00 | 0.41 | 0.04 | 12 | Pericyte      |
| <i>CDH2</i>     | 1.76 | 0.00 | 0.00 | 0.35 | 0.01 | 12 | Pericyte      |
| <i>KCNK3</i>    | 1.73 | 0.00 | 0.00 | 0.54 | 0.05 | 12 | Pericyte      |
| <i>HBEGF</i>    | 1.73 | 0.00 | 0.00 | 0.42 | 0.05 | 12 | Pericyte      |
| <i>MFGE8</i>    | 1.72 | 0.00 | 0.00 | 0.73 | 0.16 | 12 | Pericyte      |
| <i>NOTCH3</i>   | 1.71 | 0.00 | 0.00 | 0.52 | 0.03 | 12 | Pericyte      |
| <i>EBF1</i>     | 1.70 | 0.00 | 0.00 | 0.52 | 0.04 | 12 | Pericyte      |
| <i>KLHL23</i>   | 1.63 | 0.00 | 0.00 | 0.50 | 0.05 | 12 | Pericyte      |
| <i>LMCD1</i>    | 1.57 | 0.00 | 0.00 | 0.54 | 0.07 | 12 | Pericyte      |
| <i>TBX5</i>     | 1.54 | 0.00 | 0.00 | 0.49 | 0.07 | 12 | Pericyte      |
| <i>HEYL</i>     | 1.53 | 0.00 | 0.00 | 0.42 | 0.03 | 12 | Pericyte      |
| <i>GJC1</i>     | 1.38 | 0.00 | 0.00 | 0.46 | 0.07 | 12 | Pericyte      |
| <i>S1PR3</i>    | 1.37 | 0.00 | 0.00 | 0.34 | 0.04 | 12 | Pericyte      |
| <i>PAG1</i>     | 1.36 | 0.00 | 0.00 | 0.36 | 0.03 | 12 | Pericyte      |
| <i>CSPG4</i>    | 1.32 | 0.00 | 0.00 | 0.31 | 0.02 | 12 | Pericyte      |
| <i>VSNL1</i>    | 1.30 | 0.00 | 0.00 | 0.30 | 0.02 | 12 | Pericyte      |
| <i>NR2F1</i>    | 1.23 | 0.00 | 0.00 | 0.33 | 0.03 | 12 | Pericyte      |
| <i>FOXS1</i>    | 1.18 | 0.00 | 0.00 | 0.29 | 0.01 | 12 | Pericyte      |
| <i>MAGED2</i>   | 1.65 | 0.00 | 0.00 | 0.74 | 0.20 | 12 | Pericyte      |
| <i>NKAIN4</i>   | 1.45 | 0.00 | 0.00 | 0.34 | 0.04 | 12 | Pericyte      |
| <i>MCAM</i>     | 1.59 | 0.00 | 0.00 | 0.61 | 0.13 | 12 | Pericyte      |
| <i>EMID1</i>    | 1.49 | 0.00 | 0.00 | 0.34 | 0.04 | 12 | Pericyte      |
| <i>C3orf58</i>  | 1.11 | 0.00 | 0.00 | 0.29 | 0.03 | 12 | Pericyte      |

|                 |      |      |      |      |      |    |          |
|-----------------|------|------|------|------|------|----|----------|
| <i>RERG</i>     | 1.15 | 0.00 | 0.00 | 0.34 | 0.05 | 12 | Pericyte |
| <i>PPP1R14A</i> | 1.22 | 0.00 | 0.00 | 0.52 | 0.10 | 12 | Pericyte |
| <i>COL4A1</i>   | 1.36 | 0.00 | 0.00 | 0.95 | 0.50 | 12 | Pericyte |
| <i>NCK2</i>     | 1.00 | 0.00 | 0.00 | 0.29 | 0.03 | 12 | Pericyte |
| <i>P2RY14</i>   | 1.06 | 0.00 | 0.00 | 0.46 | 0.08 | 12 | Pericyte |
| <i>CADM1</i>    | 1.40 | 0.00 | 0.00 | 0.59 | 0.14 | 12 | Pericyte |
| <i>RASL12</i>   | 1.22 | 0.00 | 0.00 | 0.36 | 0.06 | 12 | Pericyte |
| <i>CRIM1</i>    | 1.39 | 0.00 | 0.00 | 0.41 | 0.08 | 12 | Pericyte |
| <i>COL4A2</i>   | 1.24 | 0.00 | 0.00 | 0.90 | 0.44 | 12 | Pericyte |
| <i>SPARCL1</i>  | 1.60 | 0.00 | 0.00 | 0.87 | 0.41 | 12 | Pericyte |
| <i>ARHGAP42</i> | 1.02 | 0.00 | 0.00 | 0.27 | 0.03 | 12 | Pericyte |
| <i>RARRES2</i>  | 1.13 | 0.00 | 0.00 | 0.61 | 0.16 | 12 | Pericyte |
| <i>EDNRA</i>    | 1.17 | 0.00 | 0.00 | 0.45 | 0.09 | 12 | Pericyte |
| <i>LAMB1</i>    | 1.24 | 0.00 | 0.00 | 0.55 | 0.15 | 12 | Pericyte |
| <i>NID1</i>     | 1.20 | 0.00 | 0.00 | 0.68 | 0.23 | 12 | Pericyte |
| <i>FERMT2</i>   | 1.43 | 0.00 | 0.00 | 0.82 | 0.39 | 12 | Pericyte |
| <i>AXL</i>      | 0.96 | 0.00 | 0.00 | 0.30 | 0.05 | 12 | Pericyte |
| <i>MYO1B</i>    | 1.17 | 0.00 | 0.00 | 0.56 | 0.16 | 12 | Pericyte |
| <i>ARHGEF17</i> | 0.94 | 0.00 | 0.00 | 0.28 | 0.04 | 12 | Pericyte |
| <i>ANGPT1</i>   | 1.33 | 0.00 | 0.00 | 0.38 | 0.08 | 12 | Pericyte |
| <i>SEPT4</i>    | 1.25 | 0.00 | 0.00 | 0.67 | 0.22 | 12 | Pericyte |
| <i>NR2F2</i>    | 1.08 | 0.00 | 0.00 | 0.62 | 0.20 | 12 | Pericyte |
| <i>MAPT</i>     | 0.99 | 0.00 | 0.00 | 0.27 | 0.04 | 12 | Pericyte |
| <i>PLAC9</i>    | 0.82 | 0.00 | 0.00 | 0.80 | 0.30 | 12 | Pericyte |
| <i>PCOLCE</i>   | 1.15 | 0.00 | 0.00 | 0.43 | 0.10 | 12 | Pericyte |
| <i>LTBP2</i>    | 1.06 | 0.00 | 0.00 | 0.42 | 0.10 | 12 | Pericyte |
| <i>GPX3</i>     | 1.29 | 0.00 | 0.00 | 0.50 | 0.14 | 12 | Pericyte |
| <i>NDN</i>      | 1.05 | 0.00 | 0.00 | 0.35 | 0.08 | 12 | Pericyte |
| <i>SPARC</i>    | 0.65 | 0.00 | 0.00 | 0.99 | 0.76 | 12 | Pericyte |
| <i>NDRG2</i>    | 0.99 | 0.00 | 0.00 | 0.37 | 0.08 | 12 | Pericyte |
| <i>CALD1</i>    | 0.84 | 0.00 | 0.00 | 0.84 | 0.43 | 12 | Pericyte |
| <i>CCRL2</i>    | 1.00 | 0.00 | 0.00 | 0.26 | 0.05 | 12 | Pericyte |
| <i>SEPT7</i>    | 1.06 | 0.00 | 0.00 | 0.88 | 0.59 | 12 | Pericyte |
| <i>RASGRP2</i>  | 1.07 | 0.00 | 0.00 | 0.37 | 0.09 | 12 | Pericyte |
| <i>TBX2</i>     | 1.03 | 0.00 | 0.00 | 0.46 | 0.13 | 12 | Pericyte |
| <i>NT5DC2</i>   | 0.90 | 0.00 | 0.00 | 0.25 | 0.05 | 12 | Pericyte |
| <i>PTEN</i>     | 0.99 | 0.00 | 0.00 | 0.42 | 0.12 | 12 | Pericyte |
| <i>MYL9</i>     | 0.96 | 0.00 | 0.00 | 0.52 | 0.17 | 12 | Pericyte |
| <i>SEPT11</i>   | 1.05 | 0.00 | 0.00 | 0.58 | 0.22 | 12 | Pericyte |
| <i>ISM1</i>     | 1.04 | 0.00 | 0.00 | 0.33 | 0.08 | 12 | Pericyte |
| <i>CD248</i>    | 0.72 | 0.00 | 0.00 | 0.26 | 0.05 | 12 | Pericyte |
| <i>FZD1</i>     | 0.84 | 0.00 | 0.00 | 0.27 | 0.06 | 12 | Pericyte |
| <i>ISCA1</i>    | 0.95 | 0.00 | 0.00 | 0.33 | 0.08 | 12 | Pericyte |

|          |      |      |      |      |      |    |          |
|----------|------|------|------|------|------|----|----------|
| MARCKS   | 0.79 | 0.00 | 0.00 | 0.87 | 0.49 | 12 | Pericyte |
| GNG11    | 0.85 | 0.00 | 0.00 | 0.71 | 0.31 | 12 | Pericyte |
| TPPP3    | 1.27 | 0.00 | 0.00 | 0.41 | 0.13 | 12 | Pericyte |
| BGN      | 1.02 | 0.00 | 0.00 | 0.61 | 0.26 | 12 | Pericyte |
| CD81     | 0.95 | 0.00 | 0.00 | 0.74 | 0.40 | 12 | Pericyte |
| TPM2     | 0.75 | 0.00 | 0.00 | 0.49 | 0.17 | 12 | Pericyte |
| PTP4A3   | 0.79 | 0.00 | 0.00 | 0.31 | 0.08 | 12 | Pericyte |
| MXRA8    | 0.83 | 0.00 | 0.00 | 0.47 | 0.17 | 12 | Pericyte |
| TBX4     | 0.88 | 0.00 | 0.00 | 0.25 | 0.06 | 12 | Pericyte |
| GJA4     | 0.73 | 0.00 | 0.00 | 0.30 | 0.08 | 12 | Pericyte |
| TIPARP   | 1.09 | 0.00 | 0.00 | 0.29 | 0.08 | 12 | Pericyte |
| LAMA4    | 0.95 | 0.00 | 0.00 | 0.40 | 0.13 | 12 | Pericyte |
| NOSTRIN  | 0.98 | 0.00 | 0.00 | 0.41 | 0.14 | 12 | Pericyte |
| CST3     | 0.81 | 0.00 | 0.00 | 0.84 | 0.59 | 12 | Pericyte |
| STOM     | 0.99 | 0.00 | 0.00 | 0.30 | 0.09 | 12 | Pericyte |
| OAZ2     | 0.84 | 0.00 | 0.00 | 0.62 | 0.30 | 12 | Pericyte |
| HSD11B1  | 0.98 | 0.00 | 0.00 | 0.28 | 0.08 | 12 | Pericyte |
| TACC1    | 0.92 | 0.00 | 0.00 | 0.52 | 0.23 | 12 | Pericyte |
| DCN      | 1.06 | 0.00 | 0.00 | 0.25 | 0.07 | 12 | Pericyte |
| MYH11    | 0.35 | 0.00 | 0.00 | 0.40 | 0.13 | 12 | Pericyte |
| LAPTM4A  | 0.64 | 0.00 | 0.00 | 0.82 | 0.55 | 12 | Pericyte |
| CYGB     | 0.93 | 0.00 | 0.00 | 0.25 | 0.07 | 12 | Pericyte |
| PTK2     | 0.72 | 0.00 | 0.00 | 0.30 | 0.09 | 12 | Pericyte |
| IGF2R    | 0.96 | 0.00 | 0.00 | 0.30 | 0.09 | 12 | Pericyte |
| NES      | 0.77 | 0.00 | 0.00 | 0.50 | 0.21 | 12 | Pericyte |
| C11orf96 | 0.71 | 0.00 | 0.00 | 0.27 | 0.08 | 12 | Pericyte |
| RBMX     | 0.85 | 0.00 | 0.00 | 0.36 | 0.14 | 12 | Pericyte |
| ARMCX3   | 0.78 | 0.00 | 0.00 | 0.34 | 0.12 | 12 | Pericyte |
| SMTN     | 0.71 | 0.00 | 0.00 | 0.28 | 0.09 | 12 | Pericyte |
| DKK3     | 0.74 | 0.00 | 0.00 | 0.36 | 0.13 | 12 | Pericyte |
| MGST3    | 0.76 | 0.00 | 0.00 | 0.35 | 0.13 | 12 | Pericyte |
| GPM6B    | 0.62 | 0.00 | 0.00 | 0.34 | 0.13 | 12 | Pericyte |
| CDKN1C   | 1.05 | 0.00 | 0.00 | 0.39 | 0.17 | 12 | Pericyte |
| GNB4     | 0.83 | 0.00 | 0.00 | 0.34 | 0.13 | 12 | Pericyte |
| BTBD3    | 0.77 | 0.00 | 0.00 | 0.35 | 0.14 | 12 | Pericyte |
| CRYAB    | 0.82 | 0.00 | 0.00 | 0.38 | 0.16 | 12 | Pericyte |
| FAM162A  | 0.81 | 0.00 | 0.00 | 0.35 | 0.15 | 12 | Pericyte |
| ITGB1    | 0.57 | 0.00 | 0.00 | 0.86 | 0.64 | 12 | Pericyte |
| EVA1B    | 0.76 | 0.00 | 0.00 | 0.43 | 0.20 | 12 | Pericyte |
| TNS1     | 0.61 | 0.00 | 0.00 | 0.48 | 0.23 | 12 | Pericyte |
| GOS2     | 0.48 | 0.00 | 0.00 | 0.35 | 0.13 | 12 | Pericyte |
| GNAS     | 0.85 | 0.00 | 0.00 | 0.85 | 0.66 | 12 | Pericyte |
| SGCE     | 0.70 | 0.00 | 0.00 | 0.29 | 0.11 | 12 | Pericyte |

|                 |      |      |      |      |      |    |          |
|-----------------|------|------|------|------|------|----|----------|
| <i>CD63</i>     | 0.60 | 0.00 | 0.00 | 0.58 | 0.34 | 12 | Pericyte |
| <i>EFEMP2</i>   | 0.62 | 0.00 | 0.00 | 0.26 | 0.09 | 12 | Pericyte |
| <i>TFPI</i>     | 0.64 | 0.00 | 0.00 | 0.29 | 0.11 | 12 | Pericyte |
| <i>TUBA1A</i>   | 0.52 | 0.00 | 0.00 | 0.76 | 0.52 | 12 | Pericyte |
| <i>ZFHX3</i>    | 0.74 | 0.00 | 0.00 | 0.37 | 0.17 | 12 | Pericyte |
| <i>SERPING1</i> | 0.55 | 0.00 | 0.00 | 0.34 | 0.14 | 12 | Pericyte |
| <i>ITM2C</i>    | 0.65 | 0.00 | 0.00 | 0.45 | 0.24 | 12 | Pericyte |
| <i>ITGA4</i>    | 0.55 | 0.00 | 0.00 | 0.25 | 0.09 | 12 | Pericyte |
| <i>TGFB11</i>   | 0.59 | 0.00 | 0.00 | 0.35 | 0.16 | 12 | Pericyte |
| <i>VASP</i>     | 0.64 | 0.00 | 0.00 | 0.40 | 0.20 | 12 | Pericyte |
| <i>EGFL6</i>    | 1.19 | 0.00 | 0.00 | 0.27 | 0.11 | 12 | Pericyte |
| <i>MT-ND4</i>   | 0.45 | 0.00 | 0.00 | 0.89 | 0.76 | 12 | Pericyte |
| <i>MT-CYB</i>   | 0.35 | 0.00 | 0.00 | 0.93 | 0.83 | 12 | Pericyte |
| <i>CCDC80</i>   | 0.68 | 0.00 | 0.00 | 0.30 | 0.12 | 12 | Pericyte |
| <i>DPYSL2</i>   | 0.58 | 0.00 | 0.00 | 0.38 | 0.18 | 12 | Pericyte |
| <i>TSC22D1</i>  | 0.53 | 0.00 | 0.00 | 0.58 | 0.35 | 12 | Pericyte |
| <i>LGALS1</i>   | 0.37 | 0.00 | 0.00 | 0.74 | 0.46 | 12 | Pericyte |
| <i>MYLK</i>     | 0.37 | 0.00 | 0.00 | 0.54 | 0.29 | 12 | Pericyte |
| <i>COL6A2</i>   | 0.58 | 0.00 | 0.00 | 0.37 | 0.18 | 12 | Pericyte |
| <i>FOXF1</i>    | 0.48 | 0.00 | 0.00 | 0.30 | 0.13 | 12 | Pericyte |
| <i>FILIP1L</i>  | 0.52 | 0.00 | 0.00 | 0.55 | 0.33 | 12 | Pericyte |
| <i>EID1</i>     | 0.52 | 0.00 | 0.00 | 0.53 | 0.33 | 12 | Pericyte |
| <i>MT-ATP6</i>  | 0.31 | 0.00 | 0.00 | 0.94 | 0.85 | 12 | Pericyte |
| <i>PPIC</i>     | 0.49 | 0.00 | 0.00 | 0.59 | 0.38 | 12 | Pericyte |
| <i>COL6A3</i>   | 0.54 | 0.00 | 0.00 | 0.29 | 0.13 | 12 | Pericyte |
| <i>MT-ND3</i>   | 0.54 | 0.00 | 0.00 | 0.68 | 0.51 | 12 | Pericyte |
| <i>COL5A2</i>   | 0.49 | 0.00 | 0.00 | 0.37 | 0.19 | 12 | Pericyte |
| <i>LOXL2</i>    | 0.38 | 0.00 | 0.00 | 0.29 | 0.13 | 12 | Pericyte |
| <i>SERPINH1</i> | 0.53 | 0.00 | 0.00 | 0.63 | 0.42 | 12 | Pericyte |
| <i>GINM1</i>    | 0.62 | 0.00 | 0.00 | 0.41 | 0.23 | 12 | Pericyte |
| <i>MYH9</i>     | 0.45 | 0.00 | 0.00 | 0.54 | 0.34 | 12 | Pericyte |
| <i>RPL29</i>    | 0.90 | 0.00 | 0.00 | 0.35 | 0.20 | 12 | Pericyte |
| <i>LIMS3</i>    | 0.73 | 0.00 | 0.00 | 0.42 | 0.26 | 12 | Pericyte |
| <i>CBFA2T3</i>  | 0.57 | 0.00 | 0.00 | 0.29 | 0.14 | 12 | Pericyte |
| <i>CIRBP</i>    | 0.54 | 0.00 | 0.00 | 0.43 | 0.26 | 12 | Pericyte |
| <i>PIK3R1</i>   | 0.42 | 0.00 | 0.00 | 0.26 | 0.12 | 12 | Pericyte |
| <i>RPL7A</i>    | 0.58 | 0.00 | 0.00 | 0.58 | 0.44 | 12 | Pericyte |
| <i>TMEM59</i>   | 0.42 | 0.00 | 0.00 | 0.61 | 0.43 | 12 | Pericyte |
| <i>RHOC</i>     | 0.47 | 0.00 | 0.00 | 0.42 | 0.24 | 12 | Pericyte |
| <i>ILK</i>      | 0.48 | 0.00 | 0.00 | 0.42 | 0.24 | 12 | Pericyte |
| <i>GAPDH</i>    | 0.77 | 0.00 | 0.00 | 0.34 | 0.19 | 12 | Pericyte |
| <i>FAM104B</i>  | 0.65 | 0.00 | 0.00 | 0.31 | 0.17 | 12 | Pericyte |
| <i>CALM2</i>    | 0.43 | 0.00 | 0.00 | 0.75 | 0.66 | 12 | Pericyte |

|                 |      |      |      |      |      |    |          |
|-----------------|------|------|------|------|------|----|----------|
| <i>CAMK2N1</i>  | 0.53 | 0.00 | 0.00 | 0.29 | 0.14 | 12 | Pericyte |
| <i>MAP1LC3A</i> | 0.47 | 0.00 | 0.00 | 0.37 | 0.21 | 12 | Pericyte |
| <i>RHOB</i>     | 0.46 | 0.00 | 0.00 | 0.26 | 0.12 | 12 | Pericyte |
| <i>CRIP2</i>    | 0.32 | 0.00 | 0.00 | 0.65 | 0.43 | 12 | Pericyte |
| <i>EIF4A2</i>   | 0.45 | 0.00 | 0.00 | 0.52 | 0.35 | 12 | Pericyte |
| <i>NPTN</i>     | 0.66 | 0.00 | 0.00 | 0.34 | 0.20 | 12 | Pericyte |
| <i>PHLDA1</i>   | 0.41 | 0.00 | 0.00 | 0.37 | 0.20 | 12 | Pericyte |
| <i>ACAA2</i>    | 0.63 | 0.00 | 0.00 | 0.29 | 0.16 | 12 | Pericyte |
| <i>TGFB2</i>    | 0.63 | 0.00 | 0.00 | 0.27 | 0.14 | 12 | Pericyte |
| <i>MT-ND2</i>   | 0.30 | 0.00 | 0.00 | 0.83 | 0.71 | 12 | Pericyte |
| <i>TPM4</i>     | 0.45 | 0.00 | 0.00 | 0.67 | 0.51 | 12 | Pericyte |
| <i>RHOJ</i>     | 0.59 | 0.00 | 0.00 | 0.32 | 0.18 | 12 | Pericyte |
| <i>TSPAN3</i>   | 0.42 | 0.00 | 0.00 | 0.31 | 0.17 | 12 | Pericyte |
| <i>SSR3</i>     | 0.61 | 0.00 | 0.00 | 0.44 | 0.30 | 12 | Pericyte |
| <i>TXNIP</i>    | 0.71 | 0.00 | 0.00 | 0.41 | 0.27 | 12 | Pericyte |
| <i>GPX8</i>     | 0.49 | 0.00 | 0.00 | 0.26 | 0.13 | 12 | Pericyte |
| <i>CD302</i>    | 0.48 | 0.00 | 0.00 | 0.28 | 0.15 | 12 | Pericyte |
| <i>AP2M1</i>    | 0.50 | 0.00 | 0.00 | 0.30 | 0.17 | 12 | Pericyte |
| <i>FCGRT</i>    | 0.37 | 0.00 | 0.00 | 0.26 | 0.13 | 12 | Pericyte |
| <i>ARL3</i>     | 0.41 | 0.00 | 0.00 | 0.25 | 0.13 | 12 | Pericyte |
| <i>PPP1R12A</i> | 0.36 | 0.00 | 0.00 | 0.43 | 0.26 | 12 | Pericyte |
| <i>RCN2</i>     | 0.38 | 0.00 | 0.00 | 0.31 | 0.17 | 12 | Pericyte |
| <i>ZBTB38</i>   | 0.43 | 0.00 | 0.00 | 0.26 | 0.14 | 12 | Pericyte |
| <i>NFIA</i>     | 0.54 | 0.00 | 0.00 | 0.39 | 0.24 | 12 | Pericyte |
| <i>PSIP1</i>    | 0.40 | 0.00 | 0.00 | 0.29 | 0.16 | 12 | Pericyte |
| <i>ANXA6</i>    | 0.46 | 0.00 | 0.00 | 0.36 | 0.22 | 12 | Pericyte |
| <i>CD151</i>    | 0.38 | 0.00 | 0.00 | 0.34 | 0.19 | 12 | Pericyte |
| <i>MAT2A</i>    | 0.61 | 0.00 | 0.00 | 0.38 | 0.25 | 12 | Pericyte |
| <i>TMEM204</i>  | 0.28 | 0.00 | 0.00 | 0.30 | 0.16 | 12 | Pericyte |
| <i>KANK2</i>    | 0.39 | 0.00 | 0.00 | 0.25 | 0.13 | 12 | Pericyte |
| <i>PPIA</i>     | 0.48 | 0.00 | 0.00 | 0.35 | 0.21 | 12 | Pericyte |
| <i>MFAP2</i>    | 0.34 | 0.00 | 0.00 | 0.53 | 0.35 | 12 | Pericyte |
| <i>TCF4</i>     | 0.26 | 0.00 | 0.00 | 0.61 | 0.42 | 12 | Pericyte |
| <i>SUMO2</i>    | 0.42 | 0.00 | 0.00 | 0.48 | 0.34 | 12 | Pericyte |
| <i>COMMD6</i>   | 0.43 | 0.00 | 0.00 | 0.29 | 0.16 | 12 | Pericyte |
| <i>CCNI</i>     | 0.49 | 0.00 | 0.00 | 0.33 | 0.20 | 12 | Pericyte |
| <i>SLC12A2</i>  | 0.39 | 0.00 | 0.00 | 0.27 | 0.15 | 12 | Pericyte |
| <i>MT-CO2</i>   | 0.32 | 0.00 | 0.00 | 0.84 | 0.79 | 12 | Pericyte |
| <i>RELL1</i>    | 0.55 | 0.00 | 0.00 | 0.30 | 0.18 | 12 | Pericyte |
| <i>PJA2</i>     | 0.44 | 0.00 | 0.00 | 0.26 | 0.14 | 12 | Pericyte |
| <i>EEF1D</i>    | 0.49 | 0.00 | 0.00 | 0.43 | 0.30 | 12 | Pericyte |
| <i>NUCB1</i>    | 0.39 | 0.00 | 0.00 | 0.28 | 0.16 | 12 | Pericyte |
| <i>ATRAID</i>   | 0.36 | 0.00 | 0.00 | 0.32 | 0.19 | 12 | Pericyte |

|                 |      |      |      |      |      |    |          |
|-----------------|------|------|------|------|------|----|----------|
| <i>CDC42BPA</i> | 0.42 | 0.00 | 0.00 | 0.26 | 0.14 | 12 | Pericyte |
| <i>PPFIBP1</i>  | 0.46 | 0.00 | 0.00 | 0.25 | 0.14 | 12 | Pericyte |
| <i>PPDPF</i>    | 0.44 | 0.00 | 0.00 | 0.35 | 0.23 | 12 | Pericyte |
| <i>APP</i>      | 0.29 | 0.00 | 0.00 | 0.77 | 0.60 | 12 | Pericyte |
| <i>UACA</i>     | 0.44 | 0.00 | 0.00 | 0.26 | 0.15 | 12 | Pericyte |
| <i>PREX2</i>    | 0.46 | 0.00 | 0.00 | 0.29 | 0.17 | 12 | Pericyte |
| <i>C12orf57</i> | 0.36 | 0.00 | 0.00 | 0.28 | 0.16 | 12 | Pericyte |
| <i>RSU1</i>     | 0.45 | 0.00 | 0.00 | 0.33 | 0.21 | 12 | Pericyte |
| <i>RPL24</i>    | 0.33 | 0.00 | 0.00 | 0.61 | 0.49 | 12 | Pericyte |
| <i>GSTP1</i>    | 0.38 | 0.00 | 0.00 | 0.37 | 0.24 | 12 | Pericyte |
| <i>HNRNPA1</i>  | 0.57 | 0.00 | 0.00 | 0.42 | 0.31 | 12 | Pericyte |
| <i>LEPROT</i>   | 0.33 | 0.00 | 0.00 | 0.48 | 0.34 | 12 | Pericyte |
| <i>RAP2A</i>    | 0.40 | 0.00 | 0.00 | 0.26 | 0.15 | 12 | Pericyte |
| <i>RAB11B</i>   | 0.33 | 0.00 | 0.00 | 0.34 | 0.22 | 12 | Pericyte |
| <i>TIMP3</i>    | 0.49 | 0.00 | 0.00 | 0.51 | 0.38 | 12 | Pericyte |
| <i>KTN1</i>     | 0.40 | 0.00 | 0.00 | 0.52 | 0.39 | 12 | Pericyte |
| <i>COL6A1</i>   | 0.29 | 0.00 | 0.00 | 0.35 | 0.22 | 12 | Pericyte |
| <i>PPIB</i>     | 0.30 | 0.00 | 0.00 | 0.59 | 0.46 | 12 | Pericyte |
| <i>CCND2</i>    | 0.38 | 0.00 | 0.00 | 0.40 | 0.28 | 12 | Pericyte |
| <i>TRMT112</i>  | 0.30 | 0.00 | 0.00 | 0.29 | 0.18 | 12 | Pericyte |
| <i>MEF2C</i>    | 0.29 | 0.00 | 0.00 | 0.30 | 0.18 | 12 | Pericyte |
| <i>RABAC1</i>   | 0.29 | 0.00 | 0.00 | 0.43 | 0.30 | 12 | Pericyte |
| <i>COMT</i>     | 0.31 | 0.00 | 0.00 | 0.26 | 0.16 | 12 | Pericyte |
| <i>GOLIM4</i>   | 0.31 | 0.00 | 0.00 | 0.32 | 0.20 | 12 | Pericyte |
| <i>FKBP8</i>    | 0.30 | 0.00 | 0.00 | 0.25 | 0.15 | 12 | Pericyte |
| <i>TSC22D3</i>  | 0.36 | 0.00 | 0.00 | 0.34 | 0.23 | 12 | Pericyte |
| <i>UQCRC1</i>   | 0.27 | 0.00 | 0.00 | 0.30 | 0.19 | 12 | Pericyte |
| <i>NDUFS5</i>   | 0.26 | 0.00 | 0.00 | 0.39 | 0.27 | 12 | Pericyte |
| <i>ECH1</i>     | 0.26 | 0.00 | 0.00 | 0.28 | 0.17 | 12 | Pericyte |
| <i>BRD3</i>     | 0.40 | 0.00 | 0.00 | 0.35 | 0.24 | 12 | Pericyte |
| <i>RBMS1</i>    | 0.31 | 0.00 | 0.00 | 0.51 | 0.38 | 12 | Pericyte |
| <i>CUTA</i>     | 0.31 | 0.00 | 0.00 | 0.31 | 0.20 | 12 | Pericyte |
| <i>ALDH2</i>    | 0.35 | 0.00 | 0.00 | 0.44 | 0.32 | 12 | Pericyte |
| <i>DRAP1</i>    | 0.39 | 0.00 | 0.00 | 0.36 | 0.25 | 12 | Pericyte |
| <i>SRP14</i>    | 0.41 | 0.00 | 0.00 | 0.43 | 0.34 | 12 | Pericyte |
| <i>DYNLL1</i>   | 0.25 | 0.00 | 0.00 | 0.59 | 0.47 | 12 | Pericyte |
| <i>CD164</i>    | 0.28 | 0.00 | 0.00 | 0.25 | 0.16 | 12 | Pericyte |
| <i>KIAA0040</i> | 0.27 | 0.00 | 0.00 | 0.27 | 0.18 | 12 | Pericyte |
| <i>EIF3L</i>    | 0.32 | 0.00 | 0.00 | 0.25 | 0.16 | 12 | Pericyte |
| <i>RNPS1</i>    | 0.28 | 0.00 | 0.00 | 0.25 | 0.16 | 12 | Pericyte |
| <i>PPP2R1A</i>  | 0.28 | 0.00 | 0.00 | 0.27 | 0.17 | 12 | Pericyte |
| <i>DYNC1I2</i>  | 0.26 | 0.00 | 0.00 | 0.61 | 0.48 | 12 | Pericyte |
| <i>CALM3</i>    | 0.26 | 0.00 | 0.00 | 0.30 | 0.21 | 12 | Pericyte |

|                 |      |      |      |      |      |    |          |
|-----------------|------|------|------|------|------|----|----------|
| <i>SERINC1</i>  | 0.29 | 0.00 | 0.00 | 0.39 | 0.29 | 12 | Pericyte |
| <i>MIF</i>      | 0.33 | 0.00 | 0.00 | 0.32 | 0.23 | 12 | Pericyte |
| <i>PRKAR1A</i>  | 0.27 | 0.00 | 0.00 | 0.43 | 0.33 | 12 | Pericyte |
| <i>RPL23A</i>   | 0.25 | 0.00 | 0.00 | 0.74 | 0.69 | 12 | Pericyte |
| <i>HNRNPA0</i>  | 0.28 | 0.00 | 0.00 | 0.34 | 0.24 | 12 | Pericyte |
| <i>C5orf15</i>  | 0.28 | 0.00 | 0.00 | 0.26 | 0.17 | 12 | Pericyte |
| <i>MPRIIP</i>   | 0.28 | 0.00 | 0.00 | 0.29 | 0.20 | 12 | Pericyte |
| <i>RAB18</i>    | 0.26 | 0.00 | 0.00 | 0.27 | 0.19 | 12 | Pericyte |
| <i>PFDN1</i>    | 0.32 | 0.00 | 0.00 | 0.35 | 0.26 | 12 | Pericyte |
| <i>EIF4G3</i>   | 0.37 | 0.00 | 0.02 | 0.32 | 0.25 | 12 | Pericyte |
| <i>ALOX5AP</i>  | 1.93 | 0.00 | 0.00 | 0.43 | 0.09 | 13 | Myeloid  |
| <i>SAMSN1</i>   | 1.42 | 0.00 | 0.00 | 0.31 | 0.06 | 13 | Myeloid  |
| <i>LAPTM5</i>   | 1.19 | 0.00 | 0.00 | 0.48 | 0.13 | 13 | Myeloid  |
| <i>CCR2</i>     | 1.20 | 0.00 | 0.00 | 0.33 | 0.07 | 13 | Myeloid  |
| <i>SELPLG</i>   | 1.10 | 0.00 | 0.00 | 0.26 | 0.05 | 13 | Myeloid  |
| <i>TYROBP</i>   | 1.29 | 0.00 | 0.00 | 0.41 | 0.12 | 13 | Myeloid  |
| <i>RAC2</i>     | 1.08 | 0.00 | 0.00 | 0.36 | 0.10 | 13 | Myeloid  |
| <i>FCER1G</i>   | 1.00 | 0.00 | 0.00 | 0.38 | 0.11 | 13 | Myeloid  |
| <i>PLEK</i>     | 1.27 | 0.00 | 0.00 | 0.27 | 0.07 | 13 | Myeloid  |
| <i>SRGN</i>     | 1.48 | 0.00 | 0.00 | 0.60 | 0.32 | 13 | Myeloid  |
| <i>ARHGDIB</i>  | 1.01 | 0.00 | 0.00 | 0.45 | 0.17 | 13 | Myeloid  |
| <i>CD53</i>     | 0.99 | 0.00 | 0.00 | 0.30 | 0.09 | 13 | Myeloid  |
| <i>CD52</i>     | 0.75 | 0.00 | 0.00 | 0.48 | 0.19 | 13 | Myeloid  |
| <i>ARHGAP30</i> | 0.91 | 0.00 | 0.00 | 0.30 | 0.10 | 13 | Myeloid  |
| <i>LCP1</i>     | 0.95 | 0.00 | 0.00 | 0.43 | 0.21 | 13 | Myeloid  |
| <i>TNFAIP8</i>  | 1.02 | 0.00 | 0.00 | 0.27 | 0.10 | 13 | Myeloid  |
| <i>PTPRC</i>    | 0.64 | 0.00 | 0.00 | 0.35 | 0.14 | 13 | Myeloid  |
| <i>PLAC8</i>    | 0.60 | 0.00 | 0.00 | 0.38 | 0.16 | 13 | Myeloid  |
| <i>APBB1IP</i>  | 0.72 | 0.00 | 0.00 | 0.25 | 0.09 | 13 | Myeloid  |
| <i>GATA2</i>    | 1.32 | 0.00 | 0.00 | 0.31 | 0.14 | 13 | Myeloid  |
| <i>COTL1</i>    | 0.84 | 0.00 | 0.00 | 0.36 | 0.17 | 13 | Myeloid  |
| <i>SEC11C</i>   | 0.82 | 0.00 | 0.00 | 0.34 | 0.16 | 13 | Myeloid  |
| <i>PTPN18</i>   | 0.77 | 0.00 | 0.00 | 0.30 | 0.13 | 13 | Myeloid  |
| <i>SH3BGRL3</i> | 0.81 | 0.00 | 0.00 | 0.54 | 0.36 | 13 | Myeloid  |
| <i>GMFG</i>     | 0.79 | 0.00 | 0.00 | 0.32 | 0.15 | 13 | Myeloid  |
| <i>TALDO1</i>   | 0.89 | 0.00 | 0.00 | 0.44 | 0.27 | 13 | Myeloid  |
| <i>GPX1</i>     | 0.89 | 0.00 | 0.00 | 0.60 | 0.44 | 13 | Myeloid  |
| <i>LGALS3</i>   | 0.67 | 0.00 | 0.00 | 0.33 | 0.16 | 13 | Myeloid  |
| <i>CREG1</i>    | 0.84 | 0.00 | 0.00 | 0.33 | 0.17 | 13 | Myeloid  |
| <i>LGALS1</i>   | 0.54 | 0.00 | 0.00 | 0.63 | 0.46 | 13 | Myeloid  |
| <i>TMSB4X</i>   | 0.63 | 0.00 | 0.00 | 0.87 | 0.90 | 13 | Myeloid  |
| <i>CRLF3</i>    | 0.76 | 0.00 | 0.00 | 0.25 | 0.13 | 13 | Myeloid  |
| <i>LRRCS8</i>   | 0.55 | 0.00 | 0.00 | 0.85 | 0.85 | 13 | Myeloid  |

|                |      |      |      |      |      |    |                   |
|----------------|------|------|------|------|------|----|-------------------|
| <i>LIMD2</i>   | 0.61 | 0.00 | 0.00 | 0.26 | 0.15 | 13 | Myeloid           |
| <i>ATG3</i>    | 0.95 | 0.00 | 0.00 | 0.28 | 0.18 | 13 | Myeloid           |
| <i>ARPC1B</i>  | 0.53 | 0.00 | 0.00 | 0.48 | 0.37 | 13 | Myeloid           |
| <i>ARPC5</i>   | 0.54 | 0.00 | 0.00 | 0.60 | 0.58 | 13 | Myeloid           |
| <i>CRIP1</i>   | 0.46 | 0.00 | 0.00 | 0.58 | 0.48 | 13 | Myeloid           |
| <i>S100A10</i> | 0.61 | 0.00 | 0.00 | 0.49 | 0.41 | 13 | Myeloid           |
| <i>TAOK3</i>   | 0.55 | 0.00 | 0.00 | 0.29 | 0.19 | 13 | Myeloid           |
| <i>ARPC2</i>   | 0.41 | 0.00 | 0.00 | 0.64 | 0.62 | 13 | Myeloid           |
| <i>RPLP1</i>   | 0.30 | 0.00 | 0.00 | 0.84 | 0.91 | 13 | Myeloid           |
| <i>CTSD</i>    | 0.56 | 0.00 | 0.00 | 0.34 | 0.25 | 13 | Myeloid           |
| <i>LDHA</i>    | 0.59 | 0.00 | 0.00 | 0.39 | 0.32 | 13 | Myeloid           |
| <i>WDR89</i>   | 0.28 | 0.00 | 0.00 | 0.82 | 0.82 | 13 | Myeloid           |
| <i>HBA2</i>    | 2.03 | 0.00 | 0.00 | 0.67 | 0.65 | 13 | Myeloid           |
| <i>JUNB</i>    | 0.67 | 0.00 | 0.00 | 0.29 | 0.21 | 13 | Myeloid           |
| <i>CD47</i>    | 0.43 | 0.00 | 0.00 | 0.48 | 0.41 | 13 | Myeloid           |
| <i>PFN1</i>    | 0.46 | 0.00 | 0.00 | 0.52 | 0.49 | 13 | Myeloid           |
| <i>KLF6</i>    | 0.77 | 0.00 | 0.00 | 0.41 | 0.35 | 13 | Myeloid           |
| <i>NCOR1</i>   | 0.44 | 0.00 | 0.00 | 0.46 | 0.40 | 13 | Myeloid           |
| <i>CYBA</i>    | 0.27 | 0.00 | 0.00 | 0.40 | 0.32 | 13 | Myeloid           |
| <i>TSPO</i>    | 0.46 | 0.00 | 0.00 | 0.34 | 0.27 | 13 | Myeloid           |
| <i>ALDOA</i>   | 0.54 | 0.00 | 0.00 | 0.30 | 0.23 | 13 | Myeloid           |
| <i>ADIPOR1</i> | 0.50 | 0.00 | 0.00 | 0.30 | 0.22 | 13 | Myeloid           |
| <i>MBNL1</i>   | 0.52 | 0.00 | 0.00 | 0.32 | 0.26 | 13 | Myeloid           |
| <i>SAMHD1</i>  | 0.36 | 0.00 | 0.03 | 0.26 | 0.19 | 13 | Myeloid           |
| <i>HMGB2</i>   | 0.48 | 0.00 | 0.03 | 0.43 | 0.38 | 13 | Myeloid           |
| <i>ANXA1</i>   | 0.44 | 0.00 | 0.04 | 0.27 | 0.20 | 13 | Myeloid           |
| <i>AKAP13</i>  | 0.46 | 0.00 | 0.04 | 0.33 | 0.27 | 13 | Myeloid           |
| <i>LRRFIP1</i> | 0.40 | 0.00 | 0.05 | 0.32 | 0.26 | 13 | Myeloid           |
| <i>LUM</i>     | 3.55 | 0.00 | 0.00 | 0.84 | 0.03 | 14 | Matrix Fibroblast |
| <i>A2M</i>     | 2.95 | 0.00 | 0.00 | 0.66 | 0.05 | 14 | Matrix Fibroblast |
| <i>DCN</i>     | 2.67 | 0.00 | 0.00 | 0.87 | 0.06 | 14 | Matrix Fibroblast |
| <i>FBLN1</i>   | 2.60 | 0.00 | 0.00 | 0.85 | 0.07 | 14 | Matrix Fibroblast |
| <i>RARRES2</i> | 2.37 | 0.00 | 0.00 | 0.88 | 0.16 | 14 | Matrix Fibroblast |
| <i>RPL29</i>   | 2.23 | 0.00 | 0.00 | 0.97 | 0.19 | 14 | Matrix Fibroblast |
| <i>RARRES1</i> | 2.03 | 0.00 | 0.00 | 0.48 | 0.01 | 14 | Matrix Fibroblast |
| <i>C7</i>      | 2.02 | 0.00 | 0.00 | 0.70 | 0.02 | 14 | Matrix Fibroblast |
| <i>COL6A3</i>  | 1.96 | 0.00 | 0.00 | 0.80 | 0.12 | 14 | Matrix Fibroblast |
| <i>TIMP1</i>   | 1.89 | 0.00 | 0.00 | 0.76 | 0.08 | 14 | Matrix Fibroblast |
| <i>PLEKHH2</i> | 1.78 | 0.00 | 0.00 | 0.66 | 0.06 | 14 | Matrix Fibroblast |
| <i>GPC3</i>    | 1.72 | 0.00 | 0.00 | 0.86 | 0.17 | 14 | Matrix Fibroblast |
| <i>NR2F1</i>   | 1.71 | 0.00 | 0.00 | 0.59 | 0.03 | 14 | Matrix Fibroblast |
| <i>C1R</i>     | 1.71 | 0.00 | 0.00 | 0.56 | 0.04 | 14 | Matrix Fibroblast |
| <i>SLC40A1</i> | 1.69 | 0.00 | 0.00 | 0.61 | 0.03 | 14 | Matrix Fibroblast |

|                 |      |      |      |      |      |    |                   |
|-----------------|------|------|------|------|------|----|-------------------|
| <i>HSPA1A</i>   | 1.67 | 0.00 | 0.00 | 0.61 | 0.05 | 14 | Matrix Fibroblast |
| <i>WNT2</i>     | 1.66 | 0.00 | 0.00 | 0.64 | 0.05 | 14 | Matrix Fibroblast |
| <i>SOD3</i>     | 1.65 | 0.00 | 0.00 | 0.62 | 0.06 | 14 | Matrix Fibroblast |
| <i>INMT</i>     | 1.64 | 0.00 | 0.00 | 0.66 | 0.05 | 14 | Matrix Fibroblast |
| <i>SNRPN</i>    | 1.59 | 0.00 | 0.00 | 0.61 | 0.04 | 14 | Matrix Fibroblast |
| <i>UBL5</i>     | 1.57 | 0.00 | 0.00 | 0.72 | 0.06 | 14 | Matrix Fibroblast |
| <i>AOC3</i>     | 1.56 | 0.00 | 0.00 | 0.57 | 0.03 | 14 | Matrix Fibroblast |
| <i>ABCA8</i>    | 1.52 | 0.00 | 0.00 | 0.48 | 0.01 | 14 | Matrix Fibroblast |
| <i>CCBE1</i>    | 1.44 | 0.00 | 0.00 | 0.46 | 0.01 | 14 | Matrix Fibroblast |
| <i>EPHX1</i>    | 1.33 | 0.00 | 0.00 | 0.47 | 0.04 | 14 | Matrix Fibroblast |
| <i>METTL7A</i>  | 1.33 | 0.00 | 0.00 | 0.42 | 0.02 | 14 | Matrix Fibroblast |
| <i>ABCA6</i>    | 1.32 | 0.00 | 0.00 | 0.38 | 0.01 | 14 | Matrix Fibroblast |
| <i>RSPO2</i>    | 1.31 | 0.00 | 0.00 | 0.43 | 0.01 | 14 | Matrix Fibroblast |
| <i>GYPC</i>     | 1.30 | 0.00 | 0.00 | 0.56 | 0.06 | 14 | Matrix Fibroblast |
| <i>CCL2</i>     | 1.29 | 0.00 | 0.00 | 0.32 | 0.02 | 14 | Matrix Fibroblast |
| <i>COX7A1</i>   | 1.20 | 0.00 | 0.00 | 0.45 | 0.03 | 14 | Matrix Fibroblast |
| <i>FGFR4</i>    | 1.19 | 0.00 | 0.00 | 0.46 | 0.03 | 14 | Matrix Fibroblast |
| <i>GDF10</i>    | 1.19 | 0.00 | 0.00 | 0.35 | 0.01 | 14 | Matrix Fibroblast |
| <i>EIF2S3</i>   | 1.10 | 0.00 | 0.00 | 0.36 | 0.02 | 14 | Matrix Fibroblast |
| <i>PYURF</i>    | 1.09 | 0.00 | 0.00 | 0.44 | 0.03 | 14 | Matrix Fibroblast |
| <i>CLEC11A</i>  | 1.07 | 0.00 | 0.00 | 0.36 | 0.02 | 14 | Matrix Fibroblast |
| <i>MYL6B</i>    | 1.07 | 0.00 | 0.00 | 0.38 | 0.02 | 14 | Matrix Fibroblast |
| <i>SAT2</i>     | 1.05 | 0.00 | 0.00 | 0.43 | 0.04 | 14 | Matrix Fibroblast |
| <i>QPRT</i>     | 0.99 | 0.00 | 0.00 | 0.31 | 0.01 | 14 | Matrix Fibroblast |
| <i>MOXD1</i>    | 0.91 | 0.00 | 0.00 | 0.26 | 0.01 | 14 | Matrix Fibroblast |
| <i>ITGAE</i>    | 0.81 | 0.00 | 0.00 | 0.26 | 0.01 | 14 | Matrix Fibroblast |
| <i>CCNB1IP1</i> | 0.77 | 0.00 | 0.00 | 0.26 | 0.01 | 14 | Matrix Fibroblast |
| <i>ENAH</i>     | 1.21 | 0.00 | 0.00 | 0.48 | 0.05 | 14 | Matrix Fibroblast |
| <i>TMEM98</i>   | 1.28 | 0.00 | 0.00 | 0.57 | 0.07 | 14 | Matrix Fibroblast |
| <i>HNRNPA1</i>  | 1.92 | 0.00 | 0.00 | 0.96 | 0.30 | 14 | Matrix Fibroblast |
| <i>LITAF</i>    | 1.72 | 0.00 | 0.00 | 0.70 | 0.12 | 14 | Matrix Fibroblast |
| <i>MDFI</i>     | 1.04 | 0.00 | 0.00 | 0.39 | 0.04 | 14 | Matrix Fibroblast |
| <i>CSRP1</i>    | 1.81 | 0.00 | 0.00 | 0.83 | 0.19 | 14 | Matrix Fibroblast |
| <i>IFITM2</i>   | 1.15 | 0.00 | 0.00 | 0.60 | 0.08 | 14 | Matrix Fibroblast |
| <i>CYBRD1</i>   | 0.85 | 0.00 | 0.00 | 0.28 | 0.02 | 14 | Matrix Fibroblast |
| <i>XRCC6</i>    | 1.11 | 0.00 | 0.00 | 0.51 | 0.06 | 14 | Matrix Fibroblast |
| <i>CCNI</i>     | 1.55 | 0.00 | 0.00 | 0.86 | 0.19 | 14 | Matrix Fibroblast |
| <i>CD59</i>     | 1.22 | 0.00 | 0.00 | 0.54 | 0.07 | 14 | Matrix Fibroblast |
| <i>PPP1R14A</i> | 1.46 | 0.00 | 0.00 | 0.66 | 0.10 | 14 | Matrix Fibroblast |
| <i>TCF21</i>    | 1.43 | 0.00 | 0.00 | 0.85 | 0.17 | 14 | Matrix Fibroblast |
| <i>HMGN3</i>    | 1.27 | 0.00 | 0.00 | 0.54 | 0.07 | 14 | Matrix Fibroblast |
| <i>HSPB6</i>    | 0.85 | 0.00 | 0.00 | 0.27 | 0.02 | 14 | Matrix Fibroblast |
| <i>OLFML3</i>   | 1.39 | 0.00 | 0.00 | 0.63 | 0.09 | 14 | Matrix Fibroblast |

|                 |      |      |      |      |      |    |                   |
|-----------------|------|------|------|------|------|----|-------------------|
| <i>ZNF428</i>   | 1.03 | 0.00 | 0.00 | 0.44 | 0.05 | 14 | Matrix Fibroblast |
| <i>CIRBP</i>    | 1.71 | 0.00 | 0.00 | 0.90 | 0.25 | 14 | Matrix Fibroblast |
| <i>LDHB</i>     | 1.35 | 0.00 | 0.00 | 0.66 | 0.11 | 14 | Matrix Fibroblast |
| <i>BAG2</i>     | 0.93 | 0.00 | 0.00 | 0.33 | 0.03 | 14 | Matrix Fibroblast |
| <i>ZFP36L2</i>  | 1.65 | 0.00 | 0.00 | 0.71 | 0.14 | 14 | Matrix Fibroblast |
| <i>RPL7A</i>    | 1.80 | 0.00 | 0.00 | 0.98 | 0.43 | 14 | Matrix Fibroblast |
| <i>DST</i>      | 1.50 | 0.00 | 0.00 | 0.75 | 0.15 | 14 | Matrix Fibroblast |
| <i>MGST3</i>    | 1.35 | 0.00 | 0.00 | 0.70 | 0.13 | 14 | Matrix Fibroblast |
| <i>RPL13A</i>   | 2.12 | 0.00 | 0.00 | 1.00 | 0.59 | 14 | Matrix Fibroblast |
| <i>COL6A2</i>   | 1.49 | 0.00 | 0.00 | 0.79 | 0.18 | 14 | Matrix Fibroblast |
| <i>MMP23B</i>   | 0.93 | 0.00 | 0.00 | 0.40 | 0.04 | 14 | Matrix Fibroblast |
| <i>MEOX2</i>    | 1.11 | 0.00 | 0.00 | 0.59 | 0.09 | 14 | Matrix Fibroblast |
| <i>ZSCAN18</i>  | 0.81 | 0.00 | 0.00 | 0.29 | 0.02 | 14 | Matrix Fibroblast |
| <i>PCOLCE</i>   | 1.23 | 0.00 | 0.00 | 0.63 | 0.10 | 14 | Matrix Fibroblast |
| <i>LRRC17</i>   | 1.14 | 0.00 | 0.00 | 0.47 | 0.06 | 14 | Matrix Fibroblast |
| <i>FAT3</i>     | 0.82 | 0.00 | 0.00 | 0.25 | 0.02 | 14 | Matrix Fibroblast |
| <i>PTGER1</i>   | 0.79 | 0.00 | 0.00 | 0.26 | 0.02 | 14 | Matrix Fibroblast |
| <i>MSRB2</i>    | 0.97 | 0.00 | 0.00 | 0.39 | 0.04 | 14 | Matrix Fibroblast |
| <i>PPP1R3C</i>  | 1.29 | 0.00 | 0.00 | 0.40 | 0.05 | 14 | Matrix Fibroblast |
| <i>NBEAL1</i>   | 1.31 | 0.00 | 0.00 | 0.66 | 0.13 | 14 | Matrix Fibroblast |
| <i>VCAN</i>     | 1.16 | 0.00 | 0.00 | 0.69 | 0.13 | 14 | Matrix Fibroblast |
| <i>DEGS1</i>    | 0.76 | 0.00 | 0.00 | 0.28 | 0.02 | 14 | Matrix Fibroblast |
| <i>NME4</i>     | 0.87 | 0.00 | 0.00 | 0.33 | 0.03 | 14 | Matrix Fibroblast |
| <i>IFI27L2</i>  | 0.96 | 0.00 | 0.00 | 0.32 | 0.03 | 14 | Matrix Fibroblast |
| <i>LBH</i>      | 1.36 | 0.00 | 0.00 | 0.83 | 0.20 | 14 | Matrix Fibroblast |
| <i>PPIA</i>     | 1.25 | 0.00 | 0.00 | 0.84 | 0.21 | 14 | Matrix Fibroblast |
| <i>SNCA</i>     | 0.84 | 0.00 | 0.00 | 0.27 | 0.02 | 14 | Matrix Fibroblast |
| <i>COMMD6</i>   | 1.23 | 0.00 | 0.00 | 0.74 | 0.16 | 14 | Matrix Fibroblast |
| <i>RBM42</i>    | 0.81 | 0.00 | 0.00 | 0.27 | 0.02 | 14 | Matrix Fibroblast |
| <i>EIF3L</i>    | 1.27 | 0.00 | 0.00 | 0.72 | 0.16 | 14 | Matrix Fibroblast |
| <i>TMEM230</i>  | 1.08 | 0.00 | 0.00 | 0.49 | 0.07 | 14 | Matrix Fibroblast |
| <i>NDN</i>      | 1.03 | 0.00 | 0.00 | 0.50 | 0.08 | 14 | Matrix Fibroblast |
| <i>HSPB1</i>    | 1.11 | 0.00 | 0.00 | 0.76 | 0.17 | 14 | Matrix Fibroblast |
| <i>PPDPF</i>    | 1.28 | 0.00 | 0.00 | 0.83 | 0.22 | 14 | Matrix Fibroblast |
| <i>COL6A1</i>   | 1.35 | 0.00 | 0.00 | 0.82 | 0.22 | 14 | Matrix Fibroblast |
| <i>RPL7</i>     | 1.35 | 0.00 | 0.00 | 1.00 | 0.77 | 14 | Matrix Fibroblast |
| <i>FMOD</i>     | 0.78 | 0.00 | 0.00 | 0.26 | 0.02 | 14 | Matrix Fibroblast |
| <i>CD82</i>     | 1.05 | 0.00 | 0.00 | 0.38 | 0.04 | 14 | Matrix Fibroblast |
| <i>LGALS3BP</i> | 0.98 | 0.00 | 0.00 | 0.41 | 0.05 | 14 | Matrix Fibroblast |
| <i>EMILIN1</i>  | 1.14 | 0.00 | 0.00 | 0.58 | 0.10 | 14 | Matrix Fibroblast |
| <i>LURAP1L</i>  | 1.00 | 0.00 | 0.00 | 0.41 | 0.05 | 14 | Matrix Fibroblast |
| <i>GAPDH</i>    | 1.16 | 0.00 | 0.00 | 0.79 | 0.19 | 14 | Matrix Fibroblast |
| <i>FBXO17</i>   | 0.81 | 0.00 | 0.00 | 0.29 | 0.03 | 14 | Matrix Fibroblast |

|                 |      |      |      |      |      |    |                   |
|-----------------|------|------|------|------|------|----|-------------------|
| <i>EEF1D</i>    | 1.30 | 0.00 | 0.00 | 0.91 | 0.29 | 14 | Matrix Fibroblast |
| <i>EFEMP2</i>   | 1.06 | 0.00 | 0.00 | 0.54 | 0.09 | 14 | Matrix Fibroblast |
| <i>FGF7</i>     | 1.03 | 0.00 | 0.00 | 0.39 | 0.05 | 14 | Matrix Fibroblast |
| <i>SRP14</i>    | 1.31 | 0.00 | 0.00 | 0.92 | 0.33 | 14 | Matrix Fibroblast |
| <i>RPS27A</i>   | 1.24 | 0.00 | 0.00 | 1.00 | 0.78 | 14 | Matrix Fibroblast |
| <i>RPL24</i>    | 1.33 | 0.00 | 0.00 | 0.98 | 0.49 | 14 | Matrix Fibroblast |
| <i>COL1A1</i>   | 1.18 | 0.00 | 0.00 | 0.90 | 0.28 | 14 | Matrix Fibroblast |
| <i>ELN</i>      | 1.14 | 0.00 | 0.00 | 0.75 | 0.18 | 14 | Matrix Fibroblast |
| <i>MIF</i>      | 1.23 | 0.00 | 0.00 | 0.81 | 0.22 | 14 | Matrix Fibroblast |
| <i>PFN2</i>     | 0.86 | 0.00 | 0.00 | 0.32 | 0.04 | 14 | Matrix Fibroblast |
| <i>NDFIP1</i>   | 1.06 | 0.00 | 0.00 | 0.56 | 0.10 | 14 | Matrix Fibroblast |
| <i>RPL23A</i>   | 1.29 | 0.00 | 0.00 | 0.99 | 0.69 | 14 | Matrix Fibroblast |
| <i>MFAP4</i>    | 1.08 | 0.00 | 0.00 | 0.88 | 0.26 | 14 | Matrix Fibroblast |
| <i>XRCC5</i>    | 0.94 | 0.00 | 0.00 | 0.40 | 0.06 | 14 | Matrix Fibroblast |
| <i>SERPING1</i> | 0.96 | 0.00 | 0.00 | 0.66 | 0.14 | 14 | Matrix Fibroblast |
| <i>LTBP4</i>    | 1.10 | 0.00 | 0.00 | 0.59 | 0.12 | 14 | Matrix Fibroblast |
| <i>CAMK2N1</i>  | 1.11 | 0.00 | 0.00 | 0.64 | 0.14 | 14 | Matrix Fibroblast |
| <i>TFPI</i>     | 0.98 | 0.00 | 0.00 | 0.58 | 0.11 | 14 | Matrix Fibroblast |
| <i>DYNC2LI1</i> | 0.81 | 0.00 | 0.00 | 0.29 | 0.03 | 14 | Matrix Fibroblast |
| <i>LMO4</i>     | 1.38 | 0.00 | 0.00 | 0.81 | 0.25 | 14 | Matrix Fibroblast |
| <i>RPS4X</i>    | 1.02 | 0.00 | 0.00 | 1.00 | 0.88 | 14 | Matrix Fibroblast |
| <i>TOMM7</i>    | 1.27 | 0.00 | 0.00 | 0.93 | 0.39 | 14 | Matrix Fibroblast |
| <i>FCGRT</i>    | 1.05 | 0.00 | 0.00 | 0.61 | 0.13 | 14 | Matrix Fibroblast |
| <i>GSTP1</i>    | 1.18 | 0.00 | 0.00 | 0.80 | 0.24 | 14 | Matrix Fibroblast |
| <i>RPS13</i>    | 1.12 | 0.00 | 0.00 | 1.00 | 0.66 | 14 | Matrix Fibroblast |
| <i>CD63</i>     | 1.31 | 0.00 | 0.00 | 0.90 | 0.34 | 14 | Matrix Fibroblast |
| <i>KRT10</i>    | 0.88 | 0.00 | 0.00 | 0.39 | 0.06 | 14 | Matrix Fibroblast |
| <i>GOS2</i>     | 1.20 | 0.00 | 0.00 | 0.62 | 0.13 | 14 | Matrix Fibroblast |
| <i>TRMT112</i>  | 1.07 | 0.00 | 0.00 | 0.69 | 0.17 | 14 | Matrix Fibroblast |
| <i>MT-ND3</i>   | 1.30 | 0.00 | 0.00 | 0.95 | 0.51 | 14 | Matrix Fibroblast |
| <i>GCSH</i>     | 0.91 | 0.00 | 0.00 | 0.39 | 0.06 | 14 | Matrix Fibroblast |
| <i>S100A6</i>   | 1.13 | 0.00 | 0.00 | 0.92 | 0.35 | 14 | Matrix Fibroblast |
| <i>ALDH1A1</i>  | 0.95 | 0.00 | 0.00 | 0.33 | 0.04 | 14 | Matrix Fibroblast |
| <i>MDK</i>      | 1.05 | 0.00 | 0.00 | 0.80 | 0.22 | 14 | Matrix Fibroblast |
| <i>PDGFRB</i>   | 0.76 | 0.00 | 0.00 | 0.42 | 0.07 | 14 | Matrix Fibroblast |
| <i>TGM2</i>     | 1.40 | 0.00 | 0.00 | 0.51 | 0.11 | 14 | Matrix Fibroblast |
| <i>DUT</i>      | 0.96 | 0.00 | 0.00 | 0.52 | 0.10 | 14 | Matrix Fibroblast |
| <i>ADI1</i>     | 0.83 | 0.00 | 0.00 | 0.33 | 0.04 | 14 | Matrix Fibroblast |
| <i>MZT2B</i>    | 0.89 | 0.00 | 0.00 | 0.46 | 0.08 | 14 | Matrix Fibroblast |
| <i>SHISA3</i>   | 0.82 | 0.00 | 0.00 | 0.25 | 0.03 | 14 | Matrix Fibroblast |
| <i>ANGPT1</i>   | 0.80 | 0.00 | 0.00 | 0.45 | 0.08 | 14 | Matrix Fibroblast |
| <i>RSL24D1</i>  | 0.98 | 0.00 | 0.00 | 0.55 | 0.12 | 14 | Matrix Fibroblast |
| <i>VAMP2</i>    | 0.94 | 0.00 | 0.00 | 0.48 | 0.09 | 14 | Matrix Fibroblast |

|                 |      |      |      |      |      |    |                   |
|-----------------|------|------|------|------|------|----|-------------------|
| <i>MYL9</i>     | 0.87 | 0.00 | 0.00 | 0.68 | 0.17 | 14 | Matrix Fibroblast |
| <i>BEX4</i>     | 0.71 | 0.00 | 0.00 | 0.26 | 0.03 | 14 | Matrix Fibroblast |
| <i>RBMX</i>     | 1.02 | 0.00 | 0.00 | 0.58 | 0.13 | 14 | Matrix Fibroblast |
| <i>TERF2IP</i>  | 0.86 | 0.00 | 0.00 | 0.44 | 0.08 | 14 | Matrix Fibroblast |
| <i>EIF3E</i>    | 1.23 | 0.00 | 0.00 | 0.90 | 0.43 | 14 | Matrix Fibroblast |
| <i>GSTM3</i>    | 0.78 | 0.00 | 0.00 | 0.36 | 0.06 | 14 | Matrix Fibroblast |
| <i>MT-ND4</i>   | 0.95 | 0.00 | 0.00 | 0.99 | 0.76 | 14 | Matrix Fibroblast |
| <i>RPLP1</i>    | 0.79 | 0.00 | 0.00 | 1.00 | 0.91 | 14 | Matrix Fibroblast |
| <i>DKK3</i>     | 0.90 | 0.00 | 0.00 | 0.58 | 0.13 | 14 | Matrix Fibroblast |
| <i>MAOB</i>     | 0.75 | 0.00 | 0.00 | 0.27 | 0.03 | 14 | Matrix Fibroblast |
| <i>PRMT2</i>    | 0.90 | 0.00 | 0.00 | 0.36 | 0.06 | 14 | Matrix Fibroblast |
| <i>BTG1</i>     | 1.05 | 0.00 | 0.00 | 0.86 | 0.30 | 14 | Matrix Fibroblast |
| <i>RPLP2</i>    | 0.89 | 0.00 | 0.00 | 1.00 | 0.83 | 14 | Matrix Fibroblast |
| <i>RPL8</i>     | 0.83 | 0.00 | 0.00 | 1.00 | 0.81 | 14 | Matrix Fibroblast |
| <i>RAB13</i>    | 1.02 | 0.00 | 0.00 | 0.52 | 0.12 | 14 | Matrix Fibroblast |
| <i>OST4</i>     | 1.04 | 0.00 | 0.00 | 0.80 | 0.28 | 14 | Matrix Fibroblast |
| <i>PTK7</i>     | 0.76 | 0.00 | 0.00 | 0.30 | 0.04 | 14 | Matrix Fibroblast |
| <i>TUFM</i>     | 0.89 | 0.00 | 0.00 | 0.41 | 0.08 | 14 | Matrix Fibroblast |
| <i>SUMO2</i>    | 1.02 | 0.00 | 0.00 | 0.86 | 0.34 | 14 | Matrix Fibroblast |
| <i>C12orf57</i> | 0.95 | 0.00 | 0.00 | 0.62 | 0.16 | 14 | Matrix Fibroblast |
| <i>GRHPR</i>    | 0.70 | 0.00 | 0.00 | 0.30 | 0.04 | 14 | Matrix Fibroblast |
| <i>UXT</i>      | 0.87 | 0.00 | 0.00 | 0.37 | 0.06 | 14 | Matrix Fibroblast |
| <i>PRMT1</i>    | 0.85 | 0.00 | 0.00 | 0.53 | 0.12 | 14 | Matrix Fibroblast |
| <i>VSTM4</i>    | 0.69 | 0.00 | 0.00 | 0.28 | 0.04 | 14 | Matrix Fibroblast |
| <i>RPL10A</i>   | 0.85 | 0.00 | 0.00 | 0.99 | 0.76 | 14 | Matrix Fibroblast |
| <i>RAB34</i>    | 0.84 | 0.00 | 0.00 | 0.47 | 0.10 | 14 | Matrix Fibroblast |
| <i>CHID1</i>    | 0.65 | 0.00 | 0.00 | 0.27 | 0.04 | 14 | Matrix Fibroblast |
| <i>ALKBH7</i>   | 0.75 | 0.00 | 0.00 | 0.34 | 0.06 | 14 | Matrix Fibroblast |
| <i>ENPP2</i>    | 0.62 | 0.00 | 0.00 | 0.34 | 0.06 | 14 | Matrix Fibroblast |
| <i>RPL37A</i>   | 0.74 | 0.00 | 0.00 | 1.00 | 0.85 | 14 | Matrix Fibroblast |
| <i>TPM2</i>     | 0.70 | 0.00 | 0.00 | 0.64 | 0.17 | 14 | Matrix Fibroblast |
| <i>SLIT2</i>    | 0.79 | 0.00 | 0.00 | 0.41 | 0.08 | 14 | Matrix Fibroblast |
| <i>HNRNPA0</i>  | 0.92 | 0.00 | 0.00 | 0.72 | 0.24 | 14 | Matrix Fibroblast |
| <i>FBXO7</i>    | 0.67 | 0.00 | 0.00 | 0.26 | 0.04 | 14 | Matrix Fibroblast |
| <i>EID1</i>     | 0.90 | 0.00 | 0.00 | 0.84 | 0.32 | 14 | Matrix Fibroblast |
| <i>RASL12</i>   | 0.76 | 0.00 | 0.00 | 0.34 | 0.06 | 14 | Matrix Fibroblast |
| <i>EIF4A2</i>   | 1.02 | 0.00 | 0.00 | 0.82 | 0.34 | 14 | Matrix Fibroblast |
| <i>PNRC1</i>    | 0.89 | 0.00 | 0.00 | 0.70 | 0.22 | 14 | Matrix Fibroblast |
| <i>POSTN</i>    | 0.54 | 0.00 | 0.00 | 0.45 | 0.09 | 14 | Matrix Fibroblast |
| <i>SLIT3</i>    | 0.66 | 0.00 | 0.00 | 0.26 | 0.04 | 14 | Matrix Fibroblast |
| <i>RPS20</i>    | 0.73 | 0.00 | 0.00 | 0.99 | 0.81 | 14 | Matrix Fibroblast |
| <i>FHL1</i>     | 0.75 | 0.00 | 0.00 | 0.84 | 0.30 | 14 | Matrix Fibroblast |
| <i>PIEZO2</i>   | 0.75 | 0.00 | 0.00 | 0.49 | 0.11 | 14 | Matrix Fibroblast |

|                |      |      |      |      |      |    |                   |
|----------------|------|------|------|------|------|----|-------------------|
| <i>MAFB</i>    | 0.74 | 0.00 | 0.00 | 0.26 | 0.04 | 14 | Matrix Fibroblast |
| <i>FTH1</i>    | 0.67 | 0.00 | 0.00 | 0.99 | 0.82 | 14 | Matrix Fibroblast |
| <i>SNRPD2</i>  | 0.91 | 0.00 | 0.00 | 0.78 | 0.28 | 14 | Matrix Fibroblast |
| <i>PFDN5</i>   | 0.87 | 0.00 | 0.00 | 0.95 | 0.52 | 14 | Matrix Fibroblast |
| <i>NUCKS1</i>  | 0.95 | 0.00 | 0.00 | 0.77 | 0.29 | 14 | Matrix Fibroblast |
| <i>RPL18A</i>  | 0.74 | 0.00 | 0.00 | 1.00 | 0.84 | 14 | Matrix Fibroblast |
| <i>GNAI1</i>   | 0.82 | 0.00 | 0.00 | 0.38 | 0.08 | 14 | Matrix Fibroblast |
| <i>FXYD1</i>   | 0.74 | 0.00 | 0.00 | 0.45 | 0.10 | 14 | Matrix Fibroblast |
| <i>COLEC12</i> | 0.69 | 0.00 | 0.00 | 0.47 | 0.11 | 14 | Matrix Fibroblast |
| <i>ACTG1</i>   | 0.82 | 0.00 | 0.00 | 0.98 | 0.78 | 14 | Matrix Fibroblast |
| <i>RGS3</i>    | 1.25 | 0.00 | 0.00 | 0.37 | 0.08 | 14 | Matrix Fibroblast |
| <i>SLC38A5</i> | 0.66 | 0.00 | 0.00 | 0.33 | 0.06 | 14 | Matrix Fibroblast |
| <i>MPST</i>    | 0.68 | 0.00 | 0.00 | 0.27 | 0.04 | 14 | Matrix Fibroblast |
| <i>RUNX1T1</i> | 0.68 | 0.00 | 0.00 | 0.33 | 0.06 | 14 | Matrix Fibroblast |
| <i>VAMP5</i>   | 0.72 | 0.00 | 0.00 | 0.50 | 0.13 | 14 | Matrix Fibroblast |
| <i>MAGED2</i>  | 0.78 | 0.00 | 0.00 | 0.66 | 0.21 | 14 | Matrix Fibroblast |
| <i>FAM43A</i>  | 0.70 | 0.00 | 0.00 | 0.26 | 0.04 | 14 | Matrix Fibroblast |
| <i>PPA1</i>    | 0.69 | 0.00 | 0.00 | 0.37 | 0.08 | 14 | Matrix Fibroblast |
| <i>CD164</i>   | 0.77 | 0.00 | 0.00 | 0.55 | 0.16 | 14 | Matrix Fibroblast |
| <i>CITED2</i>  | 0.84 | 0.00 | 0.00 | 0.45 | 0.11 | 14 | Matrix Fibroblast |
| <i>CHST2</i>   | 0.78 | 0.00 | 0.00 | 0.34 | 0.07 | 14 | Matrix Fibroblast |
| <i>NUPR1</i>   | 0.59 | 0.00 | 0.00 | 0.67 | 0.20 | 14 | Matrix Fibroblast |
| <i>WSB1</i>    | 0.85 | 0.00 | 0.00 | 0.69 | 0.24 | 14 | Matrix Fibroblast |
| <i>TMSB4X</i>  | 0.72 | 0.00 | 0.00 | 1.00 | 0.90 | 14 | Matrix Fibroblast |
| <i>PARK7</i>   | 0.83 | 0.00 | 0.00 | 0.75 | 0.28 | 14 | Matrix Fibroblast |
| <i>CDH11</i>   | 0.45 | 0.00 | 0.00 | 0.67 | 0.19 | 14 | Matrix Fibroblast |
| <i>TMA7</i>    | 0.85 | 0.00 | 0.00 | 0.82 | 0.35 | 14 | Matrix Fibroblast |
| <i>SSR2</i>    | 0.84 | 0.00 | 0.00 | 0.80 | 0.34 | 14 | Matrix Fibroblast |
| <i>MTCH1</i>   | 0.76 | 0.00 | 0.00 | 0.57 | 0.17 | 14 | Matrix Fibroblast |
| <i>EI24</i>    | 0.69 | 0.00 | 0.00 | 0.35 | 0.07 | 14 | Matrix Fibroblast |
| <i>CEBPB</i>   | 0.74 | 0.00 | 0.00 | 0.42 | 0.10 | 14 | Matrix Fibroblast |
| <i>RPA2</i>    | 0.65 | 0.00 | 0.00 | 0.30 | 0.06 | 14 | Matrix Fibroblast |
| <i>UQCRB</i>   | 0.87 | 0.00 | 0.00 | 0.90 | 0.47 | 14 | Matrix Fibroblast |
| <i>PSMB7</i>   | 0.76 | 0.00 | 0.00 | 0.48 | 0.13 | 14 | Matrix Fibroblast |
| <i>TMEM43</i>  | 0.65 | 0.00 | 0.00 | 0.31 | 0.06 | 14 | Matrix Fibroblast |
| <i>ARL6IP5</i> | 0.73 | 0.00 | 0.00 | 0.50 | 0.14 | 14 | Matrix Fibroblast |
| <i>IMPDH2</i>  | 0.78 | 0.00 | 0.00 | 0.44 | 0.11 | 14 | Matrix Fibroblast |
| <i>NACA</i>    | 0.75 | 0.00 | 0.00 | 0.96 | 0.61 | 14 | Matrix Fibroblast |
| <i>NDUFAF3</i> | 0.68 | 0.00 | 0.00 | 0.35 | 0.07 | 14 | Matrix Fibroblast |
| <i>PSMF1</i>   | 0.62 | 0.00 | 0.00 | 0.28 | 0.05 | 14 | Matrix Fibroblast |
| <i>EDF1</i>    | 0.78 | 0.00 | 0.00 | 0.81 | 0.34 | 14 | Matrix Fibroblast |
| <i>FILIP1</i>  | 0.69 | 0.00 | 0.00 | 0.33 | 0.07 | 14 | Matrix Fibroblast |
| <i>SPINT2</i>  | 0.65 | 0.00 | 0.00 | 0.44 | 0.11 | 14 | Matrix Fibroblast |

|                 |      |      |      |      |      |    |                   |
|-----------------|------|------|------|------|------|----|-------------------|
| <i>POLR2L</i>   | 0.78 | 0.00 | 0.00 | 0.61 | 0.19 | 14 | Matrix Fibroblast |
| <i>HEBP1</i>    | 0.53 | 0.00 | 0.00 | 0.27 | 0.05 | 14 | Matrix Fibroblast |
| <i>LAMA4</i>    | 0.72 | 0.00 | 0.00 | 0.49 | 0.13 | 14 | Matrix Fibroblast |
| <i>ZYX</i>      | 0.85 | 0.00 | 0.00 | 0.61 | 0.20 | 14 | Matrix Fibroblast |
| <i>EEF2</i>     | 0.81 | 0.00 | 0.00 | 0.94 | 0.59 | 14 | Matrix Fibroblast |
| <i>APOE</i>     | 0.72 | 0.00 | 0.00 | 0.70 | 0.27 | 14 | Matrix Fibroblast |
| <i>LSM3</i>     | 0.66 | 0.00 | 0.00 | 0.46 | 0.12 | 14 | Matrix Fibroblast |
| <i>PHPT1</i>    | 0.74 | 0.00 | 0.00 | 0.47 | 0.13 | 14 | Matrix Fibroblast |
| <i>TRIP10</i>   | 0.65 | 0.00 | 0.00 | 0.31 | 0.06 | 14 | Matrix Fibroblast |
| <i>LAPTM4A</i>  | 0.79 | 0.00 | 0.00 | 0.91 | 0.55 | 14 | Matrix Fibroblast |
| <i>MRC2</i>     | 0.66 | 0.00 | 0.00 | 0.28 | 0.05 | 14 | Matrix Fibroblast |
| <i>TMBIM4</i>   | 0.72 | 0.00 | 0.00 | 0.52 | 0.15 | 14 | Matrix Fibroblast |
| <i>SERPINB6</i> | 0.57 | 0.00 | 0.00 | 0.29 | 0.06 | 14 | Matrix Fibroblast |
| <i>QSOX1</i>    | 0.72 | 0.00 | 0.00 | 0.40 | 0.10 | 14 | Matrix Fibroblast |
| <i>TMEM205</i>  | 0.66 | 0.00 | 0.00 | 0.34 | 0.08 | 14 | Matrix Fibroblast |
| <i>SRSF9</i>    | 0.63 | 0.00 | 0.00 | 0.46 | 0.12 | 14 | Matrix Fibroblast |
| <i>ERGIC3</i>   | 0.73 | 0.00 | 0.00 | 0.54 | 0.17 | 14 | Matrix Fibroblast |
| <i>H3F3A</i>    | 0.69 | 0.00 | 0.00 | 0.94 | 0.62 | 14 | Matrix Fibroblast |
| <i>OGN</i>      | 0.39 | 0.00 | 0.00 | 0.50 | 0.13 | 14 | Matrix Fibroblast |
| <i>VPS28</i>    | 0.70 | 0.00 | 0.00 | 0.61 | 0.21 | 14 | Matrix Fibroblast |
| <i>PLD3</i>     | 0.65 | 0.00 | 0.00 | 0.35 | 0.08 | 14 | Matrix Fibroblast |
| <i>GPX3</i>     | 0.68 | 0.00 | 0.00 | 0.49 | 0.14 | 14 | Matrix Fibroblast |
| <i>GSTK1</i>    | 0.68 | 0.00 | 0.00 | 0.38 | 0.09 | 14 | Matrix Fibroblast |
| <i>GYG1</i>     | 0.56 | 0.00 | 0.00 | 0.61 | 0.19 | 14 | Matrix Fibroblast |
| <i>PMF1</i>     | 0.61 | 0.00 | 0.00 | 0.26 | 0.05 | 14 | Matrix Fibroblast |
| <i>MT-CO3</i>   | 0.53 | 0.00 | 0.00 | 1.00 | 0.89 | 14 | Matrix Fibroblast |
| <i>AAMDC</i>    | 0.61 | 0.00 | 0.00 | 0.33 | 0.07 | 14 | Matrix Fibroblast |
| <i>POLR2G</i>   | 0.72 | 0.00 | 0.00 | 0.49 | 0.14 | 14 | Matrix Fibroblast |
| <i>AP2M1</i>    | 0.72 | 0.00 | 0.00 | 0.54 | 0.17 | 14 | Matrix Fibroblast |
| <i>PLSCR4</i>   | 0.57 | 0.00 | 0.00 | 0.30 | 0.06 | 14 | Matrix Fibroblast |
| <i>CALM3</i>    | 0.66 | 0.00 | 0.00 | 0.61 | 0.20 | 14 | Matrix Fibroblast |
| <i>PMP22</i>    | 0.84 | 0.00 | 0.00 | 0.76 | 0.33 | 14 | Matrix Fibroblast |
| <i>EXOC7</i>    | 0.62 | 0.00 | 0.00 | 0.29 | 0.06 | 14 | Matrix Fibroblast |
| <i>HDDC2</i>    | 0.59 | 0.00 | 0.00 | 0.34 | 0.08 | 14 | Matrix Fibroblast |
| <i>CCNG1</i>    | 0.60 | 0.00 | 0.00 | 0.33 | 0.07 | 14 | Matrix Fibroblast |
| <i>LMNA</i>     | 0.94 | 0.00 | 0.00 | 0.61 | 0.23 | 14 | Matrix Fibroblast |
| <i>BTF3</i>     | 0.69 | 0.00 | 0.00 | 0.93 | 0.54 | 14 | Matrix Fibroblast |
| <i>EDNRA</i>    | 0.63 | 0.00 | 0.00 | 0.39 | 0.10 | 14 | Matrix Fibroblast |
| <i>TSPAN4</i>   | 0.65 | 0.00 | 0.00 | 0.38 | 0.09 | 14 | Matrix Fibroblast |
| <i>ITGA8</i>    | 0.42 | 0.00 | 0.00 | 0.40 | 0.10 | 14 | Matrix Fibroblast |
| <i>COL13A1</i>  | 0.51 | 0.00 | 0.00 | 0.39 | 0.10 | 14 | Matrix Fibroblast |
| <i>SERF2</i>    | 0.67 | 0.00 | 0.00 | 0.96 | 0.60 | 14 | Matrix Fibroblast |
| <i>PGAM1</i>    | 0.72 | 0.00 | 0.00 | 0.46 | 0.13 | 14 | Matrix Fibroblast |

|                  |      |      |      |      |      |    |                   |
|------------------|------|------|------|------|------|----|-------------------|
| <i>TMEM9</i>     | 0.57 | 0.00 | 0.00 | 0.32 | 0.07 | 14 | Matrix Fibroblast |
| <i>RND3</i>      | 0.78 | 0.00 | 0.00 | 0.35 | 0.08 | 14 | Matrix Fibroblast |
| <i>ENSA</i>      | 0.58 | 0.00 | 0.00 | 0.48 | 0.14 | 14 | Matrix Fibroblast |
| <i>SLC44A1</i>   | 0.64 | 0.00 | 0.00 | 0.36 | 0.09 | 14 | Matrix Fibroblast |
| <i>APEX1</i>     | 0.67 | 0.00 | 0.00 | 0.40 | 0.11 | 14 | Matrix Fibroblast |
| <i>PLAGL1</i>    | 0.57 | 0.00 | 0.00 | 0.29 | 0.06 | 14 | Matrix Fibroblast |
| <i>FOXO3</i>     | 0.63 | 0.00 | 0.00 | 0.32 | 0.08 | 14 | Matrix Fibroblast |
| <i>RPL6</i>      | 0.51 | 0.00 | 0.00 | 1.00 | 0.88 | 14 | Matrix Fibroblast |
| <i>B2M</i>       | 0.63 | 0.00 | 0.00 | 1.00 | 0.70 | 14 | Matrix Fibroblast |
| <i>CDO1</i>      | 0.48 | 0.00 | 0.00 | 0.29 | 0.06 | 14 | Matrix Fibroblast |
| <i>EIF4A3</i>    | 0.59 | 0.00 | 0.00 | 0.29 | 0.07 | 14 | Matrix Fibroblast |
| <i>GABPB1</i>    | 0.58 | 0.00 | 0.00 | 0.25 | 0.05 | 14 | Matrix Fibroblast |
| <i>MARCKSL1</i>  | 0.71 | 0.00 | 0.00 | 0.62 | 0.23 | 14 | Matrix Fibroblast |
| <i>SOX4</i>      | 0.78 | 0.00 | 0.00 | 0.84 | 0.40 | 14 | Matrix Fibroblast |
| <i>GUK1</i>      | 0.63 | 0.00 | 0.00 | 0.56 | 0.19 | 14 | Matrix Fibroblast |
| <i>FNIP1</i>     | 0.71 | 0.00 | 0.00 | 0.32 | 0.08 | 14 | Matrix Fibroblast |
| <i>NDRG2</i>     | 0.59 | 0.00 | 0.00 | 0.35 | 0.09 | 14 | Matrix Fibroblast |
| <i>FKBP8</i>     | 0.66 | 0.00 | 0.00 | 0.48 | 0.15 | 14 | Matrix Fibroblast |
| <i>MYL6</i>      | 0.59 | 0.00 | 0.00 | 0.96 | 0.72 | 14 | Matrix Fibroblast |
| <i>HSD17B11</i>  | 0.53 | 0.00 | 0.00 | 0.35 | 0.09 | 14 | Matrix Fibroblast |
| <i>NDUFS5</i>    | 0.66 | 0.00 | 0.00 | 0.67 | 0.26 | 14 | Matrix Fibroblast |
| <i>ALDOA</i>     | 0.66 | 0.00 | 0.00 | 0.61 | 0.22 | 14 | Matrix Fibroblast |
| <i>ARID1B</i>    | 0.59 | 0.00 | 0.00 | 0.35 | 0.09 | 14 | Matrix Fibroblast |
| <i>GSTO1</i>     | 0.49 | 0.00 | 0.00 | 0.32 | 0.08 | 14 | Matrix Fibroblast |
| <i>PKIG</i>      | 0.60 | 0.00 | 0.00 | 0.38 | 0.10 | 14 | Matrix Fibroblast |
| <i>RGCC</i>      | 0.55 | 0.00 | 0.00 | 0.56 | 0.19 | 14 | Matrix Fibroblast |
| <i>KANK2</i>     | 0.65 | 0.00 | 0.00 | 0.44 | 0.13 | 14 | Matrix Fibroblast |
| <i>PIH1D1</i>    | 0.56 | 0.00 | 0.00 | 0.29 | 0.07 | 14 | Matrix Fibroblast |
| <i>CUTA</i>      | 0.67 | 0.00 | 0.00 | 0.56 | 0.20 | 14 | Matrix Fibroblast |
| <i>GABARAPL2</i> | 0.61 | 0.00 | 0.00 | 0.65 | 0.25 | 14 | Matrix Fibroblast |
| <i>CARHSP1</i>   | 0.60 | 0.00 | 0.00 | 0.48 | 0.15 | 14 | Matrix Fibroblast |
| <i>UBE2E3</i>    | 0.63 | 0.00 | 0.00 | 0.47 | 0.15 | 14 | Matrix Fibroblast |
| <i>EBPL</i>      | 0.53 | 0.00 | 0.00 | 0.25 | 0.05 | 14 | Matrix Fibroblast |
| <i>BMP5</i>      | 0.62 | 0.00 | 0.00 | 0.26 | 0.06 | 14 | Matrix Fibroblast |
| <i>PLXDC2</i>    | 0.38 | 0.00 | 0.00 | 0.45 | 0.13 | 14 | Matrix Fibroblast |
| <i>COL5A1</i>    | 0.58 | 0.00 | 0.00 | 0.38 | 0.10 | 14 | Matrix Fibroblast |
| <i>UQCR11</i>    | 0.64 | 0.00 | 0.00 | 0.74 | 0.32 | 14 | Matrix Fibroblast |
| <i>CAMLG</i>     | 0.64 | 0.00 | 0.00 | 0.35 | 0.10 | 14 | Matrix Fibroblast |
| <i>PET100</i>    | 0.63 | 0.00 | 0.00 | 0.47 | 0.15 | 14 | Matrix Fibroblast |
| <i>FBLN5</i>     | 0.35 | 0.00 | 0.00 | 0.55 | 0.18 | 14 | Matrix Fibroblast |
| <i>FBL</i>       | 0.50 | 0.00 | 0.00 | 0.35 | 0.09 | 14 | Matrix Fibroblast |
| <i>6-Mar</i>     | 0.58 | 0.00 | 0.00 | 0.31 | 0.08 | 14 | Matrix Fibroblast |
| <i>IL6ST</i>     | 0.62 | 0.00 | 0.00 | 0.36 | 0.10 | 14 | Matrix Fibroblast |

|                 |      |      |      |      |      |    |                   |
|-----------------|------|------|------|------|------|----|-------------------|
| <i>TAF7</i>     | 0.55 | 0.00 | 0.00 | 0.43 | 0.13 | 14 | Matrix Fibroblast |
| <i>ACADVL</i>   | 0.60 | 0.00 | 0.00 | 0.37 | 0.10 | 14 | Matrix Fibroblast |
| <i>KDELR1</i>   | 0.61 | 0.00 | 0.00 | 0.48 | 0.16 | 14 | Matrix Fibroblast |
| <i>ENO1</i>     | 0.73 | 0.00 | 0.00 | 0.53 | 0.19 | 14 | Matrix Fibroblast |
| <i>CLU</i>      | 0.60 | 0.00 | 0.00 | 0.29 | 0.07 | 14 | Matrix Fibroblast |
| <i>SMPDL3A</i>  | 0.66 | 0.00 | 0.00 | 0.38 | 0.11 | 14 | Matrix Fibroblast |
| <i>N4BP2L2</i>  | 0.61 | 0.00 | 0.00 | 0.60 | 0.23 | 14 | Matrix Fibroblast |
| <i>DGUOK</i>    | 0.53 | 0.00 | 0.00 | 0.37 | 0.10 | 14 | Matrix Fibroblast |
| <i>SRSF7</i>    | 0.67 | 0.00 | 0.00 | 0.50 | 0.17 | 14 | Matrix Fibroblast |
| <i>NENF</i>     | 0.55 | 0.00 | 0.00 | 0.56 | 0.20 | 14 | Matrix Fibroblast |
| <i>BAD</i>      | 0.56 | 0.00 | 0.00 | 0.34 | 0.09 | 14 | Matrix Fibroblast |
| <i>SMS</i>      | 0.58 | 0.00 | 0.00 | 0.38 | 0.11 | 14 | Matrix Fibroblast |
| <i>NUCB1</i>    | 0.53 | 0.00 | 0.00 | 0.48 | 0.16 | 14 | Matrix Fibroblast |
| <i>ATRAID</i>   | 0.56 | 0.00 | 0.00 | 0.52 | 0.18 | 14 | Matrix Fibroblast |
| <i>FZD1</i>     | 0.48 | 0.00 | 0.00 | 0.26 | 0.06 | 14 | Matrix Fibroblast |
| <i>GLO1</i>     | 0.60 | 0.00 | 0.00 | 0.46 | 0.15 | 14 | Matrix Fibroblast |
| <i>PRDX6</i>    | 0.50 | 0.00 | 0.00 | 0.69 | 0.29 | 14 | Matrix Fibroblast |
| <i>DECR1</i>    | 0.50 | 0.00 | 0.00 | 0.32 | 0.08 | 14 | Matrix Fibroblast |
| <i>ST13</i>     | 0.63 | 0.00 | 0.00 | 0.75 | 0.35 | 14 | Matrix Fibroblast |
| <i>LRP1</i>     | 0.48 | 0.00 | 0.00 | 0.41 | 0.12 | 14 | Matrix Fibroblast |
| <i>LOXL1</i>    | 0.52 | 0.00 | 0.00 | 0.39 | 0.12 | 14 | Matrix Fibroblast |
| <i>ATP6V0E1</i> | 0.57 | 0.00 | 0.00 | 0.59 | 0.23 | 14 | Matrix Fibroblast |
| <i>RPL36A</i>   | 0.62 | 0.00 | 0.00 | 0.96 | 0.64 | 14 | Matrix Fibroblast |
| <i>FSCN1</i>    | 0.48 | 0.00 | 0.00 | 0.31 | 0.08 | 14 | Matrix Fibroblast |
| <i>ITGB1BP1</i> | 0.50 | 0.00 | 0.00 | 0.29 | 0.07 | 14 | Matrix Fibroblast |
| <i>EIF1AX</i>   | 0.55 | 0.00 | 0.00 | 0.58 | 0.22 | 14 | Matrix Fibroblast |
| <i>MT-CO2</i>   | 0.53 | 0.00 | 0.00 | 0.98 | 0.79 | 14 | Matrix Fibroblast |
| <i>SRSF3</i>    | 0.61 | 0.00 | 0.00 | 0.66 | 0.28 | 14 | Matrix Fibroblast |
| <i>CAV1</i>     | 0.57 | 0.00 | 0.00 | 0.78 | 0.37 | 14 | Matrix Fibroblast |
| <i>RBPJ</i>     | 0.53 | 0.00 | 0.00 | 0.38 | 0.12 | 14 | Matrix Fibroblast |
| <i>FHOD1</i>    | 0.46 | 0.00 | 0.00 | 0.28 | 0.07 | 14 | Matrix Fibroblast |
| <i>MAST4</i>    | 0.54 | 0.00 | 0.00 | 0.27 | 0.06 | 14 | Matrix Fibroblast |
| <i>ETV1</i>     | 0.48 | 0.00 | 0.00 | 0.29 | 0.07 | 14 | Matrix Fibroblast |
| <i>BRK1</i>     | 0.57 | 0.00 | 0.00 | 0.68 | 0.29 | 14 | Matrix Fibroblast |
| <i>CMTM6</i>    | 0.53 | 0.00 | 0.00 | 0.35 | 0.10 | 14 | Matrix Fibroblast |
| <i>ANXA6</i>    | 0.55 | 0.00 | 0.00 | 0.57 | 0.22 | 14 | Matrix Fibroblast |
| <i>NDUFB2</i>   | 0.59 | 0.00 | 0.00 | 0.59 | 0.24 | 14 | Matrix Fibroblast |
| <i>HADHB</i>    | 0.53 | 0.00 | 0.00 | 0.35 | 0.10 | 14 | Matrix Fibroblast |
| <i>TERF1</i>    | 0.47 | 0.00 | 0.00 | 0.26 | 0.06 | 14 | Matrix Fibroblast |
| <i>SSR4</i>     | 0.61 | 0.00 | 0.00 | 0.63 | 0.27 | 14 | Matrix Fibroblast |
| <i>COL14A1</i>  | 0.40 | 0.00 | 0.00 | 0.26 | 0.06 | 14 | Matrix Fibroblast |
| <i>TAGLN2</i>   | 0.62 | 0.00 | 0.00 | 0.83 | 0.47 | 14 | Matrix Fibroblast |
| <i>ESD</i>      | 0.60 | 0.00 | 0.00 | 0.56 | 0.22 | 14 | Matrix Fibroblast |

|                |      |      |      |      |      |    |                   |
|----------------|------|------|------|------|------|----|-------------------|
| <i>DDT</i>     | 0.56 | 0.00 | 0.00 | 0.32 | 0.09 | 14 | Matrix Fibroblast |
| <i>TMEM258</i> | 0.57 | 0.00 | 0.00 | 0.75 | 0.35 | 14 | Matrix Fibroblast |
| <i>ECH1</i>    | 0.54 | 0.00 | 0.00 | 0.48 | 0.17 | 14 | Matrix Fibroblast |
| <i>APH1A</i>   | 0.53 | 0.00 | 0.00 | 0.41 | 0.13 | 14 | Matrix Fibroblast |
| <i>RALY</i>    | 0.52 | 0.00 | 0.00 | 0.41 | 0.14 | 14 | Matrix Fibroblast |
| <i>S100A4</i>  | 0.38 | 0.00 | 0.00 | 0.35 | 0.10 | 14 | Matrix Fibroblast |
| <i>GULP1</i>   | 0.54 | 0.00 | 0.00 | 0.30 | 0.08 | 14 | Matrix Fibroblast |
| <i>LAMTOR5</i> | 0.54 | 0.00 | 0.00 | 0.52 | 0.20 | 14 | Matrix Fibroblast |
| <i>MXRA8</i>   | 0.44 | 0.00 | 0.00 | 0.49 | 0.17 | 14 | Matrix Fibroblast |
| <i>EPC1</i>    | 0.48 | 0.00 | 0.00 | 0.34 | 0.10 | 14 | Matrix Fibroblast |
| <i>ADH5</i>    | 0.52 | 0.00 | 0.00 | 0.46 | 0.16 | 14 | Matrix Fibroblast |
| <i>PSMG2</i>   | 0.47 | 0.00 | 0.00 | 0.27 | 0.07 | 14 | Matrix Fibroblast |
| <i>DSTN</i>    | 0.57 | 0.00 | 0.00 | 0.86 | 0.53 | 14 | Matrix Fibroblast |
| <i>AES</i>     | 0.55 | 0.00 | 0.00 | 0.44 | 0.16 | 14 | Matrix Fibroblast |
| <i>SIVA1</i>   | 0.51 | 0.00 | 0.00 | 0.45 | 0.16 | 14 | Matrix Fibroblast |
| <i>PGRMC1</i>  | 0.48 | 0.00 | 0.00 | 0.51 | 0.19 | 14 | Matrix Fibroblast |
| <i>LGALS1</i>  | 0.38 | 0.00 | 0.00 | 0.91 | 0.46 | 14 | Matrix Fibroblast |
| <i>SMIM7</i>   | 0.50 | 0.00 | 0.00 | 0.37 | 0.12 | 14 | Matrix Fibroblast |
| <i>UBC</i>     | 0.60 | 0.00 | 0.00 | 0.87 | 0.50 | 14 | Matrix Fibroblast |
| <i>DNPEP</i>   | 0.51 | 0.00 | 0.00 | 0.30 | 0.08 | 14 | Matrix Fibroblast |
| <i>PRNP</i>    | 0.42 | 0.00 | 0.00 | 0.41 | 0.14 | 14 | Matrix Fibroblast |
| <i>EIF4B</i>   | 0.53 | 0.00 | 0.00 | 0.51 | 0.19 | 14 | Matrix Fibroblast |
| <i>BMP4</i>    | 0.52 | 0.00 | 0.00 | 0.34 | 0.10 | 14 | Matrix Fibroblast |
| <i>EIF1</i>    | 0.52 | 0.00 | 0.00 | 0.96 | 0.69 | 14 | Matrix Fibroblast |
| <i>METTL9</i>  | 0.47 | 0.00 | 0.00 | 0.40 | 0.13 | 14 | Matrix Fibroblast |
| <i>PRSS23</i>  | 0.58 | 0.00 | 0.00 | 0.29 | 0.08 | 14 | Matrix Fibroblast |
| <i>PPIB</i>    | 0.57 | 0.00 | 0.00 | 0.81 | 0.46 | 14 | Matrix Fibroblast |
| <i>RNH1</i>    | 0.51 | 0.00 | 0.00 | 0.47 | 0.17 | 14 | Matrix Fibroblast |
| <i>SCARB2</i>  | 0.47 | 0.00 | 0.00 | 0.29 | 0.08 | 14 | Matrix Fibroblast |
| <i>VDAC2</i>   | 0.50 | 0.00 | 0.00 | 0.59 | 0.25 | 14 | Matrix Fibroblast |
| <i>TSPYL1</i>  | 0.47 | 0.00 | 0.00 | 0.34 | 0.10 | 14 | Matrix Fibroblast |
| <i>S100A10</i> | 0.59 | 0.00 | 0.00 | 0.78 | 0.41 | 14 | Matrix Fibroblast |
| <i>LRPAP1</i>  | 0.45 | 0.00 | 0.00 | 0.47 | 0.17 | 14 | Matrix Fibroblast |
| <i>CHD9</i>    | 0.43 | 0.00 | 0.00 | 0.38 | 0.13 | 14 | Matrix Fibroblast |
| <i>RAB5C</i>   | 0.48 | 0.00 | 0.00 | 0.41 | 0.14 | 14 | Matrix Fibroblast |
| <i>NHP2</i>    | 0.51 | 0.00 | 0.00 | 0.38 | 0.13 | 14 | Matrix Fibroblast |
| <i>STOM</i>    | 0.49 | 0.00 | 0.00 | 0.31 | 0.09 | 14 | Matrix Fibroblast |
| <i>SEC11A</i>  | 0.48 | 0.00 | 0.00 | 0.52 | 0.20 | 14 | Matrix Fibroblast |
| <i>RAD23A</i>  | 0.47 | 0.00 | 0.00 | 0.41 | 0.14 | 14 | Matrix Fibroblast |
| <i>SNX17</i>   | 0.45 | 0.00 | 0.00 | 0.34 | 0.11 | 14 | Matrix Fibroblast |
| <i>DPM1</i>    | 0.46 | 0.00 | 0.00 | 0.27 | 0.08 | 14 | Matrix Fibroblast |
| <i>MT-ND2</i>  | 0.49 | 0.00 | 0.00 | 0.96 | 0.71 | 14 | Matrix Fibroblast |
| <i>LSM2</i>    | 0.43 | 0.00 | 0.00 | 0.32 | 0.10 | 14 | Matrix Fibroblast |

|                 |      |      |      |      |      |    |                   |
|-----------------|------|------|------|------|------|----|-------------------|
| <i>EIF3D</i>    | 0.44 | 0.00 | 0.00 | 0.51 | 0.20 | 14 | Matrix Fibroblast |
| <i>RGS2</i>     | 0.38 | 0.00 | 0.00 | 0.63 | 0.27 | 14 | Matrix Fibroblast |
| <i>PSIP1</i>    | 0.48 | 0.00 | 0.00 | 0.43 | 0.15 | 14 | Matrix Fibroblast |
| <i>MT-CO1</i>   | 0.35 | 0.00 | 0.00 | 1.00 | 0.95 | 14 | Matrix Fibroblast |
| <i>LAMTOR4</i>  | 0.53 | 0.00 | 0.00 | 0.40 | 0.14 | 14 | Matrix Fibroblast |
| <i>SLC1A5</i>   | 0.45 | 0.00 | 0.00 | 0.33 | 0.10 | 14 | Matrix Fibroblast |
| <i>CYGB</i>     | 0.38 | 0.00 | 0.00 | 0.26 | 0.07 | 14 | Matrix Fibroblast |
| <i>COPZ1</i>    | 0.48 | 0.00 | 0.00 | 0.38 | 0.13 | 14 | Matrix Fibroblast |
| <i>TMEM59</i>   | 0.51 | 0.00 | 0.00 | 0.78 | 0.42 | 14 | Matrix Fibroblast |
| <i>RHEB</i>     | 0.48 | 0.00 | 0.00 | 0.49 | 0.19 | 14 | Matrix Fibroblast |
| <i>TNFRSF1A</i> | 0.46 | 0.00 | 0.00 | 0.39 | 0.14 | 14 | Matrix Fibroblast |
| <i>FKBP2</i>    | 0.48 | 0.00 | 0.00 | 0.49 | 0.20 | 14 | Matrix Fibroblast |
| <i>PDLIM2</i>   | 0.50 | 0.00 | 0.00 | 0.47 | 0.18 | 14 | Matrix Fibroblast |
| <i>MYH10</i>    | 0.37 | 0.00 | 0.00 | 0.56 | 0.22 | 14 | Matrix Fibroblast |
| <i>MRPS7</i>    | 0.46 | 0.00 | 0.00 | 0.27 | 0.08 | 14 | Matrix Fibroblast |
| <i>LMAN2</i>    | 0.44 | 0.00 | 0.00 | 0.42 | 0.15 | 14 | Matrix Fibroblast |
| <i>CNOT7</i>    | 0.47 | 0.00 | 0.00 | 0.29 | 0.09 | 14 | Matrix Fibroblast |
| <i>SNAI2</i>    | 0.37 | 0.00 | 0.00 | 0.36 | 0.12 | 14 | Matrix Fibroblast |
| <i>NDUFA4</i>   | 0.51 | 0.00 | 0.00 | 0.88 | 0.57 | 14 | Matrix Fibroblast |
| <i>STOML2</i>   | 0.46 | 0.00 | 0.00 | 0.31 | 0.10 | 14 | Matrix Fibroblast |
| <i>ARL6IP4</i>  | 0.42 | 0.00 | 0.00 | 0.51 | 0.20 | 14 | Matrix Fibroblast |
| <i>MAGEH1</i>   | 0.42 | 0.00 | 0.00 | 0.26 | 0.08 | 14 | Matrix Fibroblast |
| <i>ATP6AP2</i>  | 0.45 | 0.00 | 0.00 | 0.44 | 0.17 | 14 | Matrix Fibroblast |
| <i>PTMA</i>     | 0.34 | 0.00 | 0.00 | 1.00 | 0.92 | 14 | Matrix Fibroblast |
| <i>RBFOX2</i>   | 0.45 | 0.00 | 0.00 | 0.29 | 0.09 | 14 | Matrix Fibroblast |
| <i>SF3B5</i>    | 0.42 | 0.00 | 0.00 | 0.55 | 0.23 | 14 | Matrix Fibroblast |
| <i>TMED4</i>    | 0.48 | 0.00 | 0.00 | 0.30 | 0.09 | 14 | Matrix Fibroblast |
| <i>LSM5</i>     | 0.42 | 0.00 | 0.00 | 0.36 | 0.13 | 14 | Matrix Fibroblast |
| <i>CYB5B</i>    | 0.44 | 0.00 | 0.00 | 0.29 | 0.09 | 14 | Matrix Fibroblast |
| <i>TSPAN3</i>   | 0.42 | 0.00 | 0.00 | 0.44 | 0.17 | 14 | Matrix Fibroblast |
| <i>ISCU</i>     | 0.47 | 0.00 | 0.00 | 0.44 | 0.17 | 14 | Matrix Fibroblast |
| <i>EIF3I</i>    | 0.47 | 0.00 | 0.00 | 0.55 | 0.24 | 14 | Matrix Fibroblast |
| <i>KDELR2</i>   | 0.49 | 0.00 | 0.00 | 0.50 | 0.21 | 14 | Matrix Fibroblast |
| <i>AP2S1</i>    | 0.43 | 0.00 | 0.00 | 0.48 | 0.19 | 14 | Matrix Fibroblast |
| <i>MEAF6</i>    | 0.46 | 0.00 | 0.00 | 0.27 | 0.08 | 14 | Matrix Fibroblast |
| <i>TM2D3</i>    | 0.41 | 0.00 | 0.00 | 0.25 | 0.08 | 14 | Matrix Fibroblast |
| <i>DRAP1</i>    | 0.41 | 0.00 | 0.00 | 0.56 | 0.25 | 14 | Matrix Fibroblast |
| <i>TMEM147</i>  | 0.46 | 0.00 | 0.00 | 0.36 | 0.13 | 14 | Matrix Fibroblast |
| <i>FGFR1</i>    | 0.38 | 0.00 | 0.00 | 0.34 | 0.11 | 14 | Matrix Fibroblast |
| <i>MRPL51</i>   | 0.43 | 0.00 | 0.00 | 0.42 | 0.16 | 14 | Matrix Fibroblast |
| <i>TRAPPC1</i>  | 0.44 | 0.00 | 0.00 | 0.36 | 0.13 | 14 | Matrix Fibroblast |
| <i>FLOT1</i>    | 0.44 | 0.00 | 0.00 | 0.28 | 0.09 | 14 | Matrix Fibroblast |
| <i>SRP9</i>     | 0.42 | 0.00 | 0.00 | 0.63 | 0.30 | 14 | Matrix Fibroblast |

|                 |      |      |      |      |      |    |                   |
|-----------------|------|------|------|------|------|----|-------------------|
| <i>LAMTOR1</i>  | 0.43 | 0.00 | 0.00 | 0.39 | 0.15 | 14 | Matrix Fibroblast |
| <i>SPAG7</i>    | 0.46 | 0.00 | 0.00 | 0.36 | 0.13 | 14 | Matrix Fibroblast |
| <i>PPP1R15A</i> | 0.47 | 0.00 | 0.00 | 0.26 | 0.08 | 14 | Matrix Fibroblast |
| <i>JTB</i>      | 0.44 | 0.00 | 0.00 | 0.48 | 0.20 | 14 | Matrix Fibroblast |
| <i>ZNF22</i>    | 0.39 | 0.00 | 0.00 | 0.35 | 0.12 | 14 | Matrix Fibroblast |
| <i>NELFE</i>    | 0.43 | 0.00 | 0.00 | 0.26 | 0.08 | 14 | Matrix Fibroblast |
| <i>RNF146</i>   | 0.44 | 0.00 | 0.00 | 0.33 | 0.12 | 14 | Matrix Fibroblast |
| <i>NAP1L1</i>   | 0.36 | 0.00 | 0.00 | 0.83 | 0.47 | 14 | Matrix Fibroblast |
| <i>SAP18</i>    | 0.48 | 0.00 | 0.00 | 0.64 | 0.32 | 14 | Matrix Fibroblast |
| <i>COL5A2</i>   | 0.35 | 0.00 | 0.00 | 0.47 | 0.19 | 14 | Matrix Fibroblast |
| <i>CRTAP</i>    | 0.41 | 0.00 | 0.00 | 0.27 | 0.09 | 14 | Matrix Fibroblast |
| <i>PDLIM3</i>   | 0.44 | 0.00 | 0.00 | 0.27 | 0.08 | 14 | Matrix Fibroblast |
| <i>MRFAP1</i>   | 0.46 | 0.00 | 0.00 | 0.68 | 0.35 | 14 | Matrix Fibroblast |
| <i>JUNB</i>     | 0.81 | 0.00 | 0.00 | 0.47 | 0.21 | 14 | Matrix Fibroblast |
| <i>CD302</i>    | 0.28 | 0.00 | 0.00 | 0.40 | 0.14 | 14 | Matrix Fibroblast |
| <i>KLHDC3</i>   | 0.42 | 0.00 | 0.00 | 0.29 | 0.10 | 14 | Matrix Fibroblast |
| <i>EIF3G</i>    | 0.44 | 0.00 | 0.00 | 0.48 | 0.21 | 14 | Matrix Fibroblast |
| <i>HSD17B12</i> | 0.42 | 0.00 | 0.00 | 0.33 | 0.12 | 14 | Matrix Fibroblast |
| <i>EMC4</i>     | 0.41 | 0.00 | 0.00 | 0.39 | 0.15 | 14 | Matrix Fibroblast |
| <i>NOSIP</i>    | 0.44 | 0.00 | 0.00 | 0.29 | 0.10 | 14 | Matrix Fibroblast |
| <i>TMED2</i>    | 0.39 | 0.00 | 0.00 | 0.57 | 0.26 | 14 | Matrix Fibroblast |
| <i>POLR2K</i>   | 0.38 | 0.00 | 0.00 | 0.38 | 0.14 | 14 | Matrix Fibroblast |
| <i>CLNS1A</i>   | 0.41 | 0.00 | 0.00 | 0.29 | 0.10 | 14 | Matrix Fibroblast |
| <i>GADD45B</i>  | 0.62 | 0.00 | 0.00 | 0.29 | 0.10 | 14 | Matrix Fibroblast |
| <i>ITM2C</i>    | 0.41 | 0.00 | 0.00 | 0.54 | 0.24 | 14 | Matrix Fibroblast |
| <i>CSNK2B</i>   | 0.41 | 0.00 | 0.00 | 0.43 | 0.18 | 14 | Matrix Fibroblast |
| <i>EMC10</i>    | 0.38 | 0.00 | 0.00 | 0.31 | 0.11 | 14 | Matrix Fibroblast |
| <i>EGFL6</i>    | 0.28 | 0.00 | 0.00 | 0.32 | 0.11 | 14 | Matrix Fibroblast |
| <i>HERPUD1</i>  | 0.38 | 0.00 | 0.00 | 0.39 | 0.15 | 14 | Matrix Fibroblast |
| <i>EMP3</i>     | 0.34 | 0.00 | 0.00 | 0.54 | 0.24 | 14 | Matrix Fibroblast |
| <i>PNKD</i>     | 0.40 | 0.00 | 0.00 | 0.30 | 0.11 | 14 | Matrix Fibroblast |
| <i>NEDD8</i>    | 0.38 | 0.00 | 0.00 | 0.64 | 0.32 | 14 | Matrix Fibroblast |
| <i>TECR</i>     | 0.41 | 0.00 | 0.00 | 0.39 | 0.16 | 14 | Matrix Fibroblast |
| <i>TSC22D3</i>  | 0.33 | 0.00 | 0.00 | 0.51 | 0.23 | 14 | Matrix Fibroblast |
| <i>MEIS1</i>    | 0.34 | 0.00 | 0.00 | 0.27 | 0.09 | 14 | Matrix Fibroblast |
| <i>BLOC1S1</i>  | 0.40 | 0.00 | 0.00 | 0.26 | 0.08 | 14 | Matrix Fibroblast |
| <i>NDUFS4</i>   | 0.44 | 0.00 | 0.00 | 0.47 | 0.21 | 14 | Matrix Fibroblast |
| <i>COPS6</i>    | 0.38 | 0.00 | 0.00 | 0.45 | 0.19 | 14 | Matrix Fibroblast |
| <i>MRPS34</i>   | 0.39 | 0.00 | 0.00 | 0.28 | 0.10 | 14 | Matrix Fibroblast |
| <i>CNBP</i>     | 0.37 | 0.00 | 0.00 | 0.81 | 0.47 | 14 | Matrix Fibroblast |
| <i>HNRNPDL</i>  | 0.38 | 0.00 | 0.00 | 0.72 | 0.38 | 14 | Matrix Fibroblast |
| <i>ANXA1</i>    | 0.34 | 0.00 | 0.00 | 0.47 | 0.20 | 14 | Matrix Fibroblast |
| <i>HSBP1</i>    | 0.41 | 0.00 | 0.00 | 0.63 | 0.32 | 14 | Matrix Fibroblast |

|                   |      |      |      |      |      |    |                   |
|-------------------|------|------|------|------|------|----|-------------------|
| <i>C11orf58</i>   | 0.36 | 0.00 | 0.00 | 0.63 | 0.30 | 14 | Matrix Fibroblast |
| <i>PGK1</i>       | 0.42 | 0.00 | 0.00 | 0.35 | 0.13 | 14 | Matrix Fibroblast |
| <i>TMSB10</i>     | 0.29 | 0.00 | 0.00 | 1.00 | 0.88 | 14 | Matrix Fibroblast |
| <i>MRPS6</i>      | 0.39 | 0.00 | 0.00 | 0.32 | 0.12 | 14 | Matrix Fibroblast |
| <i>NFIA</i>       | 0.35 | 0.00 | 0.00 | 0.53 | 0.24 | 14 | Matrix Fibroblast |
| <i>MRPS21</i>     | 0.39 | 0.00 | 0.00 | 0.48 | 0.21 | 14 | Matrix Fibroblast |
| <i>ANAPC16</i>    | 0.41 | 0.00 | 0.00 | 0.44 | 0.19 | 14 | Matrix Fibroblast |
| <i>SRSF4</i>      | 0.35 | 0.00 | 0.00 | 0.36 | 0.14 | 14 | Matrix Fibroblast |
| <i>LAMC1</i>      | 0.41 | 0.00 | 0.00 | 0.39 | 0.16 | 14 | Matrix Fibroblast |
| <i>TACC1</i>      | 0.29 | 0.00 | 0.00 | 0.53 | 0.23 | 14 | Matrix Fibroblast |
| <i>STAT3</i>      | 0.40 | 0.00 | 0.00 | 0.40 | 0.16 | 14 | Matrix Fibroblast |
| <i>CUEDC2</i>     | 0.39 | 0.00 | 0.00 | 0.30 | 0.11 | 14 | Matrix Fibroblast |
| <i>PPP2R1A</i>    | 0.42 | 0.00 | 0.00 | 0.41 | 0.17 | 14 | Matrix Fibroblast |
| <i>MMADHC</i>     | 0.34 | 0.00 | 0.00 | 0.31 | 0.11 | 14 | Matrix Fibroblast |
| <i>SNX3</i>       | 0.36 | 0.00 | 0.00 | 0.69 | 0.35 | 14 | Matrix Fibroblast |
| <i>SUPT4H1</i>    | 0.37 | 0.00 | 0.00 | 0.40 | 0.17 | 14 | Matrix Fibroblast |
| <i>RCN2</i>       | 0.32 | 0.00 | 0.00 | 0.40 | 0.17 | 14 | Matrix Fibroblast |
| <i>HEXIM1</i>     | 0.48 | 0.00 | 0.00 | 0.31 | 0.12 | 14 | Matrix Fibroblast |
| <i>MORF4L2</i>    | 0.42 | 0.00 | 0.00 | 0.50 | 0.23 | 14 | Matrix Fibroblast |
| <i>APRT</i>       | 0.32 | 0.00 | 0.00 | 0.44 | 0.19 | 14 | Matrix Fibroblast |
| <i>CALM2</i>      | 0.40 | 0.00 | 0.00 | 0.92 | 0.66 | 14 | Matrix Fibroblast |
| <i>STMN1</i>      | 0.28 | 0.00 | 0.00 | 0.54 | 0.24 | 14 | Matrix Fibroblast |
| <i>SEC62</i>      | 0.36 | 0.00 | 0.00 | 0.80 | 0.46 | 14 | Matrix Fibroblast |
| <i>GADD45GIP1</i> | 0.29 | 0.00 | 0.00 | 0.43 | 0.18 | 14 | Matrix Fibroblast |
| <i>NDUFA11</i>    | 0.36 | 0.00 | 0.00 | 0.60 | 0.30 | 14 | Matrix Fibroblast |
| <i>VIM</i>        | 0.41 | 0.00 | 0.00 | 0.94 | 0.69 | 14 | Matrix Fibroblast |
| <i>SUMO1</i>      | 0.34 | 0.00 | 0.00 | 0.56 | 0.27 | 14 | Matrix Fibroblast |
| <i>PLS3</i>       | 0.49 | 0.00 | 0.00 | 0.47 | 0.22 | 14 | Matrix Fibroblast |
| <i>MLF2</i>       | 0.39 | 0.00 | 0.00 | 0.37 | 0.15 | 14 | Matrix Fibroblast |
| <i>ZFP36L1</i>    | 0.41 | 0.00 | 0.00 | 0.79 | 0.46 | 14 | Matrix Fibroblast |
| <i>CPQ</i>        | 0.29 | 0.00 | 0.00 | 0.27 | 0.10 | 14 | Matrix Fibroblast |
| <i>C1orf52</i>    | 0.33 | 0.00 | 0.00 | 0.27 | 0.09 | 14 | Matrix Fibroblast |
| <i>TBX2</i>       | 0.30 | 0.00 | 0.00 | 0.35 | 0.14 | 14 | Matrix Fibroblast |
| <i>TMED9</i>      | 0.39 | 0.00 | 0.00 | 0.57 | 0.28 | 14 | Matrix Fibroblast |
| <i>VKORC1</i>     | 0.34 | 0.00 | 0.00 | 0.32 | 0.12 | 14 | Matrix Fibroblast |
| <i>SDHC</i>       | 0.37 | 0.00 | 0.00 | 0.35 | 0.14 | 14 | Matrix Fibroblast |
| <i>ZFYVE21</i>    | 0.32 | 0.00 | 0.00 | 0.28 | 0.10 | 14 | Matrix Fibroblast |
| <i>TMEM14C</i>    | 0.34 | 0.00 | 0.00 | 0.48 | 0.22 | 14 | Matrix Fibroblast |
| <i>TMEM219</i>    | 0.33 | 0.00 | 0.00 | 0.27 | 0.10 | 14 | Matrix Fibroblast |
| <i>CCDC80</i>     | 0.41 | 0.00 | 0.00 | 0.32 | 0.13 | 14 | Matrix Fibroblast |
| <i>RPS19BP1</i>   | 0.33 | 0.00 | 0.00 | 0.33 | 0.13 | 14 | Matrix Fibroblast |
| <i>C1QBP</i>      | 0.30 | 0.00 | 0.00 | 0.35 | 0.14 | 14 | Matrix Fibroblast |
| <i>MT-CYB</i>     | 0.31 | 0.00 | 0.00 | 0.98 | 0.83 | 14 | Matrix Fibroblast |

|                 |      |      |      |      |      |    |                   |
|-----------------|------|------|------|------|------|----|-------------------|
| <i>CD151</i>    | 0.31 | 0.00 | 0.00 | 0.44 | 0.19 | 14 | Matrix Fibroblast |
| <i>YWHAQ</i>    | 0.35 | 0.00 | 0.00 | 0.70 | 0.38 | 14 | Matrix Fibroblast |
| <i>MRPL43</i>   | 0.32 | 0.00 | 0.00 | 0.34 | 0.14 | 14 | Matrix Fibroblast |
| <i>TXNIP</i>    | 0.31 | 0.00 | 0.00 | 0.56 | 0.27 | 14 | Matrix Fibroblast |
| <i>NDUFV1</i>   | 0.35 | 0.00 | 0.00 | 0.34 | 0.14 | 14 | Matrix Fibroblast |
| <i>DARS</i>     | 0.39 | 0.00 | 0.00 | 0.27 | 0.10 | 14 | Matrix Fibroblast |
| <i>HNRNPUL1</i> | 0.36 | 0.00 | 0.00 | 0.31 | 0.12 | 14 | Matrix Fibroblast |
| <i>MEA1</i>     | 0.30 | 0.00 | 0.00 | 0.25 | 0.09 | 14 | Matrix Fibroblast |
| <i>FAM114A1</i> | 0.31 | 0.00 | 0.00 | 0.26 | 0.10 | 14 | Matrix Fibroblast |
| <i>ATP6V1G1</i> | 0.31 | 0.00 | 0.00 | 0.65 | 0.34 | 14 | Matrix Fibroblast |
| <i>PRDX3</i>    | 0.32 | 0.00 | 0.00 | 0.30 | 0.12 | 14 | Matrix Fibroblast |
| <i>RNF5</i>     | 0.33 | 0.00 | 0.00 | 0.28 | 0.11 | 14 | Matrix Fibroblast |
| <i>HMGB1</i>    | 0.34 | 0.00 | 0.00 | 0.91 | 0.62 | 14 | Matrix Fibroblast |
| <i>MAF1</i>     | 0.30 | 0.00 | 0.00 | 0.40 | 0.18 | 14 | Matrix Fibroblast |
| <i>SPCS2</i>    | 0.30 | 0.00 | 0.00 | 0.63 | 0.33 | 14 | Matrix Fibroblast |
| <i>SLC39A1</i>  | 0.40 | 0.00 | 0.00 | 0.29 | 0.11 | 14 | Matrix Fibroblast |
| <i>TBCA</i>     | 0.36 | 0.00 | 0.00 | 0.64 | 0.35 | 14 | Matrix Fibroblast |
| <i>ANXA5</i>    | 0.31 | 0.00 | 0.00 | 0.73 | 0.43 | 14 | Matrix Fibroblast |
| <i>UQCRCQ</i>   | 0.32 | 0.00 | 0.00 | 0.66 | 0.36 | 14 | Matrix Fibroblast |
| <i>TMEM109</i>  | 0.31 | 0.00 | 0.00 | 0.32 | 0.13 | 14 | Matrix Fibroblast |
| <i>NDUFB4</i>   | 0.33 | 0.00 | 0.00 | 0.52 | 0.26 | 14 | Matrix Fibroblast |
| <i>CAMTA1</i>   | 0.27 | 0.00 | 0.00 | 0.26 | 0.10 | 14 | Matrix Fibroblast |
| <i>ENG</i>      | 0.40 | 0.00 | 0.00 | 0.32 | 0.13 | 14 | Matrix Fibroblast |
| <i>DCTN3</i>    | 0.34 | 0.00 | 0.00 | 0.40 | 0.18 | 14 | Matrix Fibroblast |
| <i>COA3</i>     | 0.33 | 0.00 | 0.00 | 0.32 | 0.14 | 14 | Matrix Fibroblast |
| <i>POLR2I</i>   | 0.28 | 0.00 | 0.00 | 0.37 | 0.16 | 14 | Matrix Fibroblast |
| <i>MRPL55</i>   | 0.31 | 0.00 | 0.00 | 0.26 | 0.10 | 14 | Matrix Fibroblast |
| <i>ILF3</i>     | 0.39 | 0.00 | 0.00 | 0.30 | 0.12 | 14 | Matrix Fibroblast |
| <i>POLR2J</i>   | 0.31 | 0.00 | 0.00 | 0.34 | 0.14 | 14 | Matrix Fibroblast |
| <i>ECHS1</i>    | 0.27 | 0.00 | 0.00 | 0.36 | 0.16 | 14 | Matrix Fibroblast |
| <i>TMEM123</i>  | 0.32 | 0.00 | 0.00 | 0.33 | 0.14 | 14 | Matrix Fibroblast |
| <i>LSM7</i>     | 0.30 | 0.00 | 0.00 | 0.38 | 0.17 | 14 | Matrix Fibroblast |
| <i>SDHD</i>     | 0.30 | 0.00 | 0.00 | 0.39 | 0.18 | 14 | Matrix Fibroblast |
| <i>PHACTR2</i>  | 0.32 | 0.00 | 0.00 | 0.32 | 0.14 | 14 | Matrix Fibroblast |
| <i>NRBP1</i>    | 0.27 | 0.00 | 0.00 | 0.33 | 0.14 | 14 | Matrix Fibroblast |
| <i>VAPA</i>     | 0.31 | 0.00 | 0.00 | 0.48 | 0.24 | 14 | Matrix Fibroblast |
| <i>PDIA6</i>    | 0.33 | 0.00 | 0.00 | 0.59 | 0.32 | 14 | Matrix Fibroblast |
| <i>ARMCX3</i>   | 0.31 | 0.00 | 0.00 | 0.30 | 0.12 | 14 | Matrix Fibroblast |
| <i>POLR2E</i>   | 0.29 | 0.00 | 0.00 | 0.38 | 0.17 | 14 | Matrix Fibroblast |
| <i>JAGN1</i>    | 0.26 | 0.00 | 0.00 | 0.25 | 0.10 | 14 | Matrix Fibroblast |
| <i>COMT</i>     | 0.27 | 0.00 | 0.00 | 0.36 | 0.16 | 14 | Matrix Fibroblast |
| <i>SGCE</i>     | 0.33 | 0.00 | 0.00 | 0.27 | 0.11 | 14 | Matrix Fibroblast |
| <i>ANXA4</i>    | 0.27 | 0.00 | 0.00 | 0.25 | 0.10 | 14 | Matrix Fibroblast |

|                 |      |      |      |      |      |    |                   |
|-----------------|------|------|------|------|------|----|-------------------|
| <i>EIF6</i>     | 0.31 | 0.00 | 0.00 | 0.31 | 0.13 | 14 | Matrix Fibroblast |
| <i>PHIP</i>     | 0.29 | 0.00 | 0.00 | 0.36 | 0.16 | 14 | Matrix Fibroblast |
| <i>MED4</i>     | 0.25 | 0.00 | 0.00 | 0.28 | 0.11 | 14 | Matrix Fibroblast |
| <i>ZNHIT1</i>   | 0.29 | 0.00 | 0.00 | 0.35 | 0.16 | 14 | Matrix Fibroblast |
| <i>AUP1</i>     | 0.28 | 0.00 | 0.00 | 0.28 | 0.12 | 14 | Matrix Fibroblast |
| <i>NAA38</i>    | 0.34 | 0.00 | 0.00 | 0.34 | 0.16 | 14 | Matrix Fibroblast |
| <i>CAPZB</i>    | 0.30 | 0.00 | 0.00 | 0.72 | 0.44 | 14 | Matrix Fibroblast |
| <i>MRPL41</i>   | 0.28 | 0.00 | 0.00 | 0.28 | 0.12 | 14 | Matrix Fibroblast |
| <i>PTOV1</i>    | 0.28 | 0.00 | 0.00 | 0.33 | 0.15 | 14 | Matrix Fibroblast |
| <i>CIB1</i>     | 0.29 | 0.00 | 0.00 | 0.31 | 0.13 | 14 | Matrix Fibroblast |
| <i>EIF3F</i>    | 0.28 | 0.00 | 0.00 | 0.67 | 0.38 | 14 | Matrix Fibroblast |
| <i>DDX18</i>    | 0.25 | 0.00 | 0.00 | 0.34 | 0.15 | 14 | Matrix Fibroblast |
| <i>UBE2N</i>    | 0.29 | 0.00 | 0.00 | 0.35 | 0.16 | 14 | Matrix Fibroblast |
| <i>TMBIM6</i>   | 0.29 | 0.00 | 0.00 | 0.68 | 0.40 | 14 | Matrix Fibroblast |
| <i>LRP10</i>    | 0.30 | 0.00 | 0.00 | 0.27 | 0.12 | 14 | Matrix Fibroblast |
| <i>UBE2E1</i>   | 0.27 | 0.00 | 0.00 | 0.28 | 0.12 | 14 | Matrix Fibroblast |
| <i>PSMB5</i>    | 0.27 | 0.00 | 0.00 | 0.47 | 0.24 | 14 | Matrix Fibroblast |
| <i>UBE2V2</i>   | 0.25 | 0.00 | 0.00 | 0.27 | 0.11 | 14 | Matrix Fibroblast |
| <i>PRDX4</i>    | 0.29 | 0.00 | 0.00 | 0.34 | 0.16 | 14 | Matrix Fibroblast |
| <i>C5orf15</i>  | 0.27 | 0.00 | 0.00 | 0.36 | 0.17 | 14 | Matrix Fibroblast |
| <i>ZNF503</i>   | 0.31 | 0.00 | 0.00 | 0.34 | 0.16 | 14 | Matrix Fibroblast |
| <i>ARF4</i>     | 0.28 | 0.00 | 0.00 | 0.53 | 0.29 | 14 | Matrix Fibroblast |
| <i>PPP1CC</i>   | 0.25 | 0.00 | 0.00 | 0.26 | 0.11 | 14 | Matrix Fibroblast |
| <i>HNRNPH3</i>  | 0.27 | 0.00 | 0.00 | 0.38 | 0.19 | 14 | Matrix Fibroblast |
| <i>SCOC</i>     | 0.27 | 0.00 | 0.00 | 0.29 | 0.13 | 14 | Matrix Fibroblast |
| <i>RNPS1</i>    | 0.27 | 0.00 | 0.00 | 0.33 | 0.16 | 14 | Matrix Fibroblast |
| <i>BBX</i>      | 0.25 | 0.00 | 0.00 | 0.29 | 0.13 | 14 | Matrix Fibroblast |
| <i>LDHA</i>     | 0.31 | 0.00 | 0.00 | 0.55 | 0.31 | 14 | Matrix Fibroblast |
| <i>PKN2</i>     | 0.32 | 0.00 | 0.00 | 0.36 | 0.19 | 14 | Matrix Fibroblast |
| <i>JUN</i>      | 0.30 | 0.00 | 0.00 | 0.64 | 0.38 | 14 | Matrix Fibroblast |
| <i>TM2D2</i>    | 0.26 | 0.00 | 0.00 | 0.32 | 0.15 | 14 | Matrix Fibroblast |
| <i>CCT3</i>     | 0.28 | 0.00 | 0.00 | 0.36 | 0.18 | 14 | Matrix Fibroblast |
| <i>TUBA1B</i>   | 0.33 | 0.00 | 0.00 | 0.72 | 0.47 | 14 | Matrix Fibroblast |
| <i>SOD2</i>     | 0.25 | 0.00 | 0.00 | 0.27 | 0.13 | 14 | Matrix Fibroblast |
| <i>PFN1</i>     | 0.27 | 0.00 | 0.00 | 0.77 | 0.49 | 14 | Matrix Fibroblast |
| <i>GIMAP7</i>   | 2.21 | 0.00 | 0.00 | 0.75 | 0.02 | 15 | Endothelial       |
| <i>TMEM255B</i> | 1.11 | 0.00 | 0.00 | 0.33 | 0.01 | 15 | Endothelial       |
| <i>IL7R</i>     | 2.21 | 0.00 | 0.00 | 0.72 | 0.03 | 15 | Endothelial       |
| <i>IGFBP2</i>   | 1.84 | 0.00 | 0.00 | 0.68 | 0.03 | 15 | Endothelial       |
| <i>HSPA1A</i>   | 2.37 | 0.00 | 0.00 | 0.83 | 0.05 | 15 | Endothelial       |
| <i>A2M</i>      | 2.05 | 0.00 | 0.00 | 0.83 | 0.05 | 15 | Endothelial       |
| <i>IL33</i>     | 1.79 | 0.00 | 0.00 | 0.70 | 0.05 | 15 | Endothelial       |
| <i>APOL3</i>    | 1.20 | 0.00 | 0.00 | 0.35 | 0.01 | 15 | Endothelial       |

|                 |      |      |      |      |      |    |             |
|-----------------|------|------|------|------|------|----|-------------|
| <i>TNFSF10</i>  | 2.40 | 0.00 | 0.00 | 0.90 | 0.10 | 15 | Endothelial |
| <i>RAMP3</i>    | 1.80 | 0.00 | 0.00 | 0.54 | 0.04 | 15 | Endothelial |
| <i>VWF</i>      | 1.51 | 0.00 | 0.00 | 0.59 | 0.04 | 15 | Endothelial |
| <i>MLF1</i>     | 1.18 | 0.00 | 0.00 | 0.41 | 0.02 | 15 | Endothelial |
| <i>THEM6</i>    | 0.96 | 0.00 | 0.00 | 0.27 | 0.01 | 15 | Endothelial |
| <i>SPEF2</i>    | 1.03 | 0.00 | 0.00 | 0.26 | 0.01 | 15 | Endothelial |
| <i>FAM167B</i>  | 1.13 | 0.00 | 0.00 | 0.35 | 0.02 | 15 | Endothelial |
| <i>UBL5</i>     | 1.84 | 0.00 | 0.00 | 0.69 | 0.07 | 15 | Endothelial |
| <i>ARHGAP18</i> | 1.71 | 0.00 | 0.00 | 0.70 | 0.07 | 15 | Endothelial |
| <i>BST2</i>     | 2.40 | 0.00 | 0.00 | 0.93 | 0.16 | 15 | Endothelial |
| <i>RGS5</i>     | 1.47 | 0.00 | 0.00 | 0.62 | 0.06 | 15 | Endothelial |
| <i>DTL</i>      | 1.23 | 0.00 | 0.00 | 0.35 | 0.02 | 15 | Endothelial |
| <i>LEPR</i>     | 1.22 | 0.00 | 0.00 | 0.37 | 0.02 | 15 | Endothelial |
| <i>EDN1</i>     | 2.34 | 0.00 | 0.00 | 0.78 | 0.10 | 15 | Endothelial |
| <i>IFITM2</i>   | 1.60 | 0.00 | 0.00 | 0.74 | 0.08 | 15 | Endothelial |
| <i>SERPINB6</i> | 1.58 | 0.00 | 0.00 | 0.59 | 0.06 | 15 | Endothelial |
| <i>VAMP5</i>    | 2.00 | 0.00 | 0.00 | 0.85 | 0.13 | 15 | Endothelial |
| <i>RGCC</i>     | 2.50 | 0.00 | 0.00 | 0.95 | 0.20 | 15 | Endothelial |
| <i>EGLN3</i>    | 1.25 | 0.00 | 0.00 | 0.38 | 0.03 | 15 | Endothelial |
| <i>THSD1</i>    | 1.52 | 0.00 | 0.00 | 0.58 | 0.06 | 15 | Endothelial |
| <i>ZNF428</i>   | 1.33 | 0.00 | 0.00 | 0.52 | 0.05 | 15 | Endothelial |
| <i>TIMP1</i>    | 1.07 | 0.00 | 0.00 | 0.68 | 0.08 | 15 | Endothelial |
| <i>RPL29</i>    | 1.76 | 0.00 | 0.00 | 0.95 | 0.20 | 15 | Endothelial |
| <i>CCDC85B</i>  | 1.70 | 0.00 | 0.00 | 0.83 | 0.14 | 15 | Endothelial |
| <i>PYURF</i>    | 1.21 | 0.00 | 0.00 | 0.43 | 0.04 | 15 | Endothelial |
| <i>BCAM</i>     | 1.56 | 0.00 | 0.00 | 0.74 | 0.11 | 15 | Endothelial |
| <i>NPDC1</i>    | 1.42 | 0.00 | 0.00 | 0.59 | 0.07 | 15 | Endothelial |
| <i>MGST2</i>    | 1.44 | 0.00 | 0.00 | 0.46 | 0.04 | 15 | Endothelial |
| <i>CXorf36</i>  | 0.98 | 0.00 | 0.00 | 0.27 | 0.02 | 15 | Endothelial |
| <i>RNF144B</i>  | 0.84 | 0.00 | 0.00 | 0.26 | 0.01 | 15 | Endothelial |
| <i>SVIP</i>     | 1.28 | 0.00 | 0.00 | 0.35 | 0.03 | 15 | Endothelial |
| <i>IFI27L2</i>  | 1.23 | 0.00 | 0.00 | 0.38 | 0.03 | 15 | Endothelial |
| <i>ISOC2</i>    | 0.98 | 0.00 | 0.00 | 0.35 | 0.03 | 15 | Endothelial |
| <i>PROCR</i>    | 1.06 | 0.00 | 0.00 | 0.35 | 0.03 | 15 | Endothelial |
| <i>PRCP</i>     | 1.59 | 0.00 | 0.00 | 0.69 | 0.11 | 15 | Endothelial |
| <i>RAMP2</i>    | 1.90 | 0.00 | 0.00 | 1.00 | 0.30 | 15 | Endothelial |
| <i>CTNNAL1</i>  | 1.29 | 0.00 | 0.00 | 0.47 | 0.05 | 15 | Endothelial |
| <i>COX7A1</i>   | 1.18 | 0.00 | 0.00 | 0.41 | 0.04 | 15 | Endothelial |
| <i>TNFRSF14</i> | 0.82 | 0.00 | 0.00 | 0.26 | 0.02 | 15 | Endothelial |
| <i>DEGS1</i>    | 1.01 | 0.00 | 0.00 | 0.33 | 0.03 | 15 | Endothelial |
| <i>GATA3</i>    | 1.10 | 0.00 | 0.00 | 0.32 | 0.02 | 15 | Endothelial |
| <i>CAV1</i>     | 2.06 | 0.00 | 0.00 | 1.00 | 0.37 | 15 | Endothelial |
| <i>PDE3B</i>    | 1.20 | 0.00 | 0.00 | 0.35 | 0.03 | 15 | Endothelial |

|                 |      |      |      |      |      |    |             |
|-----------------|------|------|------|------|------|----|-------------|
| <i>SOX7</i>     | 1.32 | 0.00 | 0.00 | 0.51 | 0.06 | 15 | Endothelial |
| <i>FCGRT</i>    | 1.60 | 0.00 | 0.00 | 0.73 | 0.13 | 15 | Endothelial |
| <i>STOM</i>     | 1.29 | 0.00 | 0.00 | 0.62 | 0.09 | 15 | Endothelial |
| <i>GNG11</i>    | 1.68 | 0.00 | 0.00 | 0.98 | 0.32 | 15 | Endothelial |
| <i>MAP3K11</i>  | 1.24 | 0.00 | 0.00 | 0.46 | 0.05 | 15 | Endothelial |
| <i>POSTN</i>    | 1.09 | 0.00 | 0.00 | 0.64 | 0.10 | 15 | Endothelial |
| <i>SOX18</i>    | 1.19 | 0.00 | 0.00 | 0.47 | 0.06 | 15 | Endothelial |
| <i>CAV2</i>     | 1.57 | 0.00 | 0.00 | 0.89 | 0.22 | 15 | Endothelial |
| <i>CCDC130</i>  | 0.97 | 0.00 | 0.00 | 0.33 | 0.03 | 15 | Endothelial |
| <i>ITM2A</i>    | 1.16 | 0.00 | 0.00 | 0.57 | 0.08 | 15 | Endothelial |
| <i>IGFBP4</i>   | 1.63 | 0.00 | 0.00 | 0.94 | 0.28 | 15 | Endothelial |
| <i>GAPDH</i>    | 1.34 | 0.00 | 0.00 | 0.85 | 0.19 | 15 | Endothelial |
| <i>ROBO4</i>    | 1.27 | 0.00 | 0.00 | 0.49 | 0.06 | 15 | Endothelial |
| <i>EPAS1</i>    | 1.54 | 0.00 | 0.00 | 0.96 | 0.28 | 15 | Endothelial |
| <i>FDPS</i>     | 1.36 | 0.00 | 0.00 | 0.54 | 0.08 | 15 | Endothelial |
| <i>B2M</i>      | 2.22 | 0.00 | 0.00 | 1.00 | 0.70 | 15 | Endothelial |
| <i>ENG</i>      | 1.41 | 0.00 | 0.00 | 0.69 | 0.13 | 15 | Endothelial |
| <i>BEX4</i>     | 1.06 | 0.00 | 0.00 | 0.33 | 0.03 | 15 | Endothelial |
| <i>CD59</i>     | 1.07 | 0.00 | 0.00 | 0.52 | 0.07 | 15 | Endothelial |
| <i>NTHL1</i>    | 0.85 | 0.00 | 0.00 | 0.27 | 0.02 | 15 | Endothelial |
| <i>PCDH12</i>   | 0.97 | 0.00 | 0.00 | 0.33 | 0.03 | 15 | Endothelial |
| <i>MARCKSL1</i> | 1.78 | 0.00 | 0.00 | 0.82 | 0.23 | 15 | Endothelial |
| <i>MT-ND3</i>   | 1.58 | 0.00 | 0.00 | 0.99 | 0.51 | 15 | Endothelial |
| <i>GMFG</i>     | 1.32 | 0.00 | 0.00 | 0.72 | 0.15 | 15 | Endothelial |
| <i>SRPX</i>     | 1.05 | 0.00 | 0.00 | 0.33 | 0.04 | 15 | Endothelial |
| <i>MGST3</i>    | 1.20 | 0.00 | 0.00 | 0.68 | 0.14 | 15 | Endothelial |
| <i>TMEM123</i>  | 1.37 | 0.00 | 0.00 | 0.68 | 0.14 | 15 | Endothelial |
| <i>PRMT1</i>    | 1.39 | 0.00 | 0.00 | 0.63 | 0.13 | 15 | Endothelial |
| <i>TMSB4X</i>   | 1.42 | 0.00 | 0.00 | 1.00 | 0.90 | 15 | Endothelial |
| <i>SLC9A3R2</i> | 1.41 | 0.00 | 0.00 | 0.85 | 0.23 | 15 | Endothelial |
| <i>NME3</i>     | 0.91 | 0.00 | 0.00 | 0.27 | 0.03 | 15 | Endothelial |
| <i>TSPAN4</i>   | 1.17 | 0.00 | 0.00 | 0.56 | 0.10 | 15 | Endothelial |
| <i>FRY</i>      | 1.01 | 0.00 | 0.00 | 0.36 | 0.04 | 15 | Endothelial |
| <i>CLEC14A</i>  | 1.30 | 0.00 | 0.00 | 0.80 | 0.19 | 15 | Endothelial |
| <i>KIAA1217</i> | 1.03 | 0.00 | 0.00 | 0.44 | 0.06 | 15 | Endothelial |
| <i>ESAM</i>     | 1.27 | 0.00 | 0.00 | 0.82 | 0.21 | 15 | Endothelial |
| <i>STXBP6</i>   | 1.05 | 0.00 | 0.00 | 0.42 | 0.06 | 15 | Endothelial |
| <i>POLR2L</i>   | 1.46 | 0.00 | 0.00 | 0.74 | 0.20 | 15 | Endothelial |
| <i>LRRC32</i>   | 1.00 | 0.00 | 0.00 | 0.30 | 0.03 | 15 | Endothelial |
| <i>TIE1</i>     | 1.17 | 0.00 | 0.00 | 0.62 | 0.12 | 15 | Endothelial |
| <i>TMEM88</i>   | 1.25 | 0.00 | 0.00 | 0.58 | 0.11 | 15 | Endothelial |
| <i>APLN</i>     | 1.09 | 0.00 | 0.00 | 0.48 | 0.08 | 15 | Endothelial |
| <i>PRKCH</i>    | 0.97 | 0.00 | 0.00 | 0.38 | 0.05 | 15 | Endothelial |

|                  |      |      |      |      |      |    |             |
|------------------|------|------|------|------|------|----|-------------|
| <i>CD46</i>      | 0.78 | 0.00 | 0.00 | 0.27 | 0.03 | 15 | Endothelial |
| <i>EBPL</i>      | 0.94 | 0.00 | 0.00 | 0.40 | 0.05 | 15 | Endothelial |
| <i>S100A10</i>   | 1.24 | 0.00 | 0.00 | 0.98 | 0.41 | 15 | Endothelial |
| <i>MRI1</i>      | 1.15 | 0.00 | 0.00 | 0.37 | 0.05 | 15 | Endothelial |
| <i>HYAL2</i>     | 1.16 | 0.00 | 0.00 | 0.53 | 0.10 | 15 | Endothelial |
| <i>HIST1H2BG</i> | 0.89 | 0.00 | 0.00 | 0.27 | 0.03 | 15 | Endothelial |
| <i>LIFR</i>      | 1.20 | 0.00 | 0.00 | 0.46 | 0.08 | 15 | Endothelial |
| <i>CLDN5</i>     | 1.19 | 0.00 | 0.00 | 0.86 | 0.24 | 15 | Endothelial |
| <i>JAM2</i>      | 1.19 | 0.00 | 0.00 | 0.44 | 0.07 | 15 | Endothelial |
| <i>ARHGAP29</i>  | 1.14 | 0.00 | 0.00 | 0.83 | 0.23 | 15 | Endothelial |
| <i>TFPI</i>      | 1.32 | 0.00 | 0.00 | 0.57 | 0.12 | 15 | Endothelial |
| <i>ISG15</i>     | 1.21 | 0.00 | 0.00 | 0.40 | 0.06 | 15 | Endothelial |
| <i>KCTD12</i>    | 1.28 | 0.00 | 0.00 | 0.48 | 0.09 | 15 | Endothelial |
| <i>FKBP1A</i>    | 1.24 | 0.00 | 0.00 | 0.95 | 0.44 | 15 | Endothelial |
| <i>CCND1</i>     | 1.40 | 0.00 | 0.00 | 0.73 | 0.20 | 15 | Endothelial |
| <i>CD93</i>      | 0.93 | 0.00 | 0.00 | 0.86 | 0.22 | 15 | Endothelial |
| <i>RHOC</i>      | 1.22 | 0.00 | 0.00 | 0.82 | 0.24 | 15 | Endothelial |
| <i>RPL13A</i>    | 1.17 | 0.00 | 0.00 | 0.98 | 0.59 | 15 | Endothelial |
| <i>HNRNPA1</i>   | 1.07 | 0.00 | 0.00 | 0.90 | 0.31 | 15 | Endothelial |
| <i>STMN1</i>     | 1.15 | 0.00 | 0.00 | 0.82 | 0.25 | 15 | Endothelial |
| <i>TM4SF1</i>    | 1.13 | 0.00 | 0.00 | 0.80 | 0.22 | 15 | Endothelial |
| <i>COMMD6</i>    | 1.09 | 0.00 | 0.00 | 0.68 | 0.17 | 15 | Endothelial |
| <i>TMSB10</i>    | 1.07 | 0.00 | 0.00 | 1.00 | 0.88 | 15 | Endothelial |
| <i>GUK1</i>      | 1.11 | 0.00 | 0.00 | 0.73 | 0.20 | 15 | Endothelial |
| <i>PTMA</i>      | 0.86 | 0.00 | 0.00 | 1.00 | 0.92 | 15 | Endothelial |
| <i>CIRBP</i>     | 1.10 | 0.00 | 0.00 | 0.84 | 0.26 | 15 | Endothelial |
| <i>KRT10</i>     | 1.05 | 0.00 | 0.00 | 0.40 | 0.06 | 15 | Endothelial |
| <i>PPIA</i>      | 1.29 | 0.00 | 0.00 | 0.73 | 0.22 | 15 | Endothelial |
| <i>FOXF1</i>     | 1.13 | 0.00 | 0.00 | 0.61 | 0.13 | 15 | Endothelial |
| <i>XRCC5</i>     | 1.03 | 0.00 | 0.00 | 0.38 | 0.06 | 15 | Endothelial |
| <i>HPGD</i>      | 0.86 | 0.00 | 0.00 | 0.90 | 0.27 | 15 | Endothelial |
| <i>FSCN1</i>     | 0.98 | 0.00 | 0.00 | 0.46 | 0.08 | 15 | Endothelial |
| <i>MT-ND4</i>    | 1.01 | 0.00 | 0.00 | 0.99 | 0.77 | 15 | Endothelial |
| <i>HMGN3</i>     | 1.04 | 0.00 | 0.00 | 0.43 | 0.08 | 15 | Endothelial |
| <i>TMEM173</i>   | 0.95 | 0.00 | 0.00 | 0.32 | 0.04 | 15 | Endothelial |
| <i>SPHK1</i>     | 0.79 | 0.00 | 0.00 | 0.26 | 0.03 | 15 | Endothelial |
| <i>OCIAD2</i>    | 0.94 | 0.00 | 0.00 | 0.32 | 0.04 | 15 | Endothelial |
| <i>SCARF1</i>    | 0.80 | 0.00 | 0.00 | 0.30 | 0.04 | 15 | Endothelial |
| <i>GSTP1</i>     | 1.01 | 0.00 | 0.00 | 0.80 | 0.24 | 15 | Endothelial |
| <i>CALCRL</i>    | 0.99 | 0.00 | 0.00 | 0.85 | 0.26 | 15 | Endothelial |
| <i>KIT</i>       | 0.85 | 0.00 | 0.00 | 0.46 | 0.08 | 15 | Endothelial |
| <i>CHST12</i>    | 0.99 | 0.00 | 0.00 | 0.33 | 0.05 | 15 | Endothelial |
| <i>UBE2L6</i>    | 0.96 | 0.00 | 0.00 | 0.36 | 0.06 | 15 | Endothelial |

|                 |      |      |      |      |      |    |             |
|-----------------|------|------|------|------|------|----|-------------|
| <i>S100A16</i>  | 1.08 | 0.00 | 0.00 | 0.82 | 0.26 | 15 | Endothelial |
| <i>H3F3A</i>    | 1.00 | 0.00 | 0.00 | 0.96 | 0.62 | 15 | Endothelial |
| <i>LXN</i>      | 1.36 | 0.00 | 0.00 | 0.54 | 0.13 | 15 | Endothelial |
| <i>SRP14</i>    | 1.05 | 0.00 | 0.00 | 0.88 | 0.34 | 15 | Endothelial |
| <i>MYL6</i>     | 0.99 | 0.00 | 0.00 | 0.98 | 0.72 | 15 | Endothelial |
| <i>NDUFAF3</i>  | 0.94 | 0.00 | 0.00 | 0.42 | 0.08 | 15 | Endothelial |
| <i>MMRN2</i>    | 0.74 | 0.00 | 0.00 | 0.33 | 0.05 | 15 | Endothelial |
| <i>CD74</i>     | 1.00 | 0.00 | 0.00 | 0.62 | 0.15 | 15 | Endothelial |
| <i>LEPROTL1</i> | 1.00 | 0.00 | 0.00 | 0.62 | 0.16 | 15 | Endothelial |
| <i>GIMAP4</i>   | 0.86 | 0.00 | 0.00 | 0.69 | 0.18 | 15 | Endothelial |
| <i>VAMP2</i>    | 0.86 | 0.00 | 0.00 | 0.47 | 0.10 | 15 | Endothelial |
| <i>CARHSP1</i>  | 1.11 | 0.00 | 0.00 | 0.59 | 0.15 | 15 | Endothelial |
| <i>HSPB8</i>    | 0.88 | 0.00 | 0.00 | 0.27 | 0.04 | 15 | Endothelial |
| <i>NAA38</i>    | 1.15 | 0.00 | 0.00 | 0.59 | 0.16 | 15 | Endothelial |
| <i>HOXA5</i>    | 1.00 | 0.00 | 0.00 | 0.57 | 0.14 | 15 | Endothelial |
| <i>PSMB9</i>    | 0.97 | 0.00 | 0.00 | 0.47 | 0.10 | 15 | Endothelial |
| <i>VAMP3</i>    | 0.96 | 0.00 | 0.00 | 0.59 | 0.15 | 15 | Endothelial |
| <i>MT-CO2</i>   | 0.84 | 0.00 | 0.00 | 1.00 | 0.79 | 15 | Endothelial |
| <i>FAM13C</i>   | 0.83 | 0.00 | 0.00 | 0.32 | 0.05 | 15 | Endothelial |
| <i>ABHD17A</i>  | 0.84 | 0.00 | 0.00 | 0.38 | 0.07 | 15 | Endothelial |
| <i>TSPAN5</i>   | 0.76 | 0.00 | 0.00 | 0.27 | 0.04 | 15 | Endothelial |
| <i>TXNIP</i>    | 1.06 | 0.00 | 0.00 | 0.78 | 0.27 | 15 | Endothelial |
| <i>EGFL7</i>    | 0.75 | 0.00 | 0.00 | 0.90 | 0.29 | 15 | Endothelial |
| <i>WSB1</i>     | 1.05 | 0.00 | 0.00 | 0.73 | 0.24 | 15 | Endothelial |
| <i>EFNA1</i>    | 0.99 | 0.00 | 0.00 | 0.42 | 0.09 | 15 | Endothelial |
| <i>PPDPF</i>    | 1.03 | 0.00 | 0.00 | 0.70 | 0.23 | 15 | Endothelial |
| <i>MYLIP</i>    | 0.80 | 0.00 | 0.00 | 0.43 | 0.09 | 15 | Endothelial |
| <i>LDB2</i>     | 0.78 | 0.00 | 0.00 | 0.65 | 0.18 | 15 | Endothelial |
| <i>GSTO1</i>    | 0.77 | 0.00 | 0.00 | 0.41 | 0.08 | 15 | Endothelial |
| <i>NUDT14</i>   | 0.87 | 0.00 | 0.00 | 0.36 | 0.07 | 15 | Endothelial |
| <i>SDF2L1</i>   | 0.77 | 0.00 | 0.00 | 0.30 | 0.05 | 15 | Endothelial |
| <i>CTNND1</i>   | 1.01 | 0.00 | 0.00 | 0.59 | 0.17 | 15 | Endothelial |
| <i>SNX3</i>     | 0.95 | 0.00 | 0.00 | 0.86 | 0.36 | 15 | Endothelial |
| <i>HSPB1</i>    | 0.93 | 0.00 | 0.00 | 0.63 | 0.17 | 15 | Endothelial |
| <i>DYNLL1</i>   | 1.02 | 0.00 | 0.00 | 0.90 | 0.47 | 15 | Endothelial |
| <i>PRPSAP1</i>  | 1.03 | 0.00 | 0.00 | 0.40 | 0.08 | 15 | Endothelial |
| <i>SERF2</i>    | 0.89 | 0.00 | 0.00 | 0.95 | 0.60 | 15 | Endothelial |
| <i>MIF</i>      | 0.88 | 0.00 | 0.00 | 0.72 | 0.23 | 15 | Endothelial |
| <i>SPSB3</i>    | 0.73 | 0.00 | 0.00 | 0.31 | 0.05 | 15 | Endothelial |
| <i>MT-ND2</i>   | 0.83 | 0.00 | 0.00 | 0.99 | 0.72 | 15 | Endothelial |
| <i>CD320</i>    | 0.82 | 0.00 | 0.00 | 0.26 | 0.04 | 15 | Endothelial |
| <i>AAMDC</i>    | 0.90 | 0.00 | 0.00 | 0.38 | 0.08 | 15 | Endothelial |
| <i>SNRPN</i>    | 0.79 | 0.00 | 0.00 | 0.30 | 0.05 | 15 | Endothelial |

|                 |      |      |      |      |      |    |             |
|-----------------|------|------|------|------|------|----|-------------|
| <i>APH1A</i>    | 0.96 | 0.00 | 0.00 | 0.52 | 0.14 | 15 | Endothelial |
| <i>TRMT112</i>  | 0.97 | 0.00 | 0.00 | 0.61 | 0.18 | 15 | Endothelial |
| <i>GPIHBP1</i>  | 0.80 | 0.00 | 0.00 | 0.61 | 0.16 | 15 | Endothelial |
| <i>EMCN</i>     | 0.73 | 0.00 | 0.00 | 0.51 | 0.12 | 15 | Endothelial |
| <i>TSPAN15</i>  | 0.76 | 0.00 | 0.00 | 0.38 | 0.08 | 15 | Endothelial |
| <i>HSPA12B</i>  | 0.83 | 0.00 | 0.00 | 0.35 | 0.07 | 15 | Endothelial |
| <i>CDC42EP1</i> | 0.88 | 0.00 | 0.00 | 0.42 | 0.10 | 15 | Endothelial |
| <i>RPL7A</i>    | 0.91 | 0.00 | 0.00 | 0.90 | 0.44 | 15 | Endothelial |
| <i>JAM3</i>     | 0.76 | 0.00 | 0.00 | 0.26 | 0.04 | 15 | Endothelial |
| <i>TGFBR2</i>   | 0.93 | 0.00 | 0.00 | 0.49 | 0.12 | 15 | Endothelial |
| <i>ETS2</i>     | 1.08 | 0.00 | 0.00 | 0.49 | 0.13 | 15 | Endothelial |
| <i>DACH1</i>    | 0.81 | 0.00 | 0.00 | 0.31 | 0.06 | 15 | Endothelial |
| <i>PECAM1</i>   | 0.75 | 0.00 | 0.00 | 0.78 | 0.26 | 15 | Endothelial |
| <i>FABP5</i>    | 1.47 | 0.00 | 0.00 | 0.53 | 0.15 | 15 | Endothelial |
| <i>SH3BP5</i>   | 0.79 | 0.00 | 0.00 | 0.65 | 0.20 | 15 | Endothelial |
| <i>HSPG2</i>    | 0.72 | 0.00 | 0.00 | 0.36 | 0.07 | 15 | Endothelial |
| <i>MAOA</i>     | 0.84 | 0.00 | 0.00 | 0.38 | 0.08 | 15 | Endothelial |
| <i>DUT</i>      | 0.86 | 0.00 | 0.00 | 0.44 | 0.11 | 15 | Endothelial |
| <i>TMA7</i>     | 0.94 | 0.00 | 0.00 | 0.80 | 0.35 | 15 | Endothelial |
| <i>TMEM230</i>  | 0.88 | 0.00 | 0.00 | 0.37 | 0.08 | 15 | Endothelial |
| <i>TMEM219</i>  | 0.86 | 0.00 | 0.00 | 0.42 | 0.10 | 15 | Endothelial |
| <i>CYYR1</i>    | 0.77 | 0.00 | 0.00 | 0.56 | 0.15 | 15 | Endothelial |
| <i>CDH5</i>     | 0.70 | 0.00 | 0.00 | 0.75 | 0.24 | 15 | Endothelial |
| <i>STARD3</i>   | 0.82 | 0.00 | 0.00 | 0.32 | 0.06 | 15 | Endothelial |
| <i>CAMTA1</i>   | 0.82 | 0.00 | 0.00 | 0.42 | 0.10 | 15 | Endothelial |
| <i>ACVRL1</i>   | 0.66 | 0.00 | 0.00 | 0.64 | 0.19 | 15 | Endothelial |
| <i>RPS27A</i>   | 0.66 | 0.00 | 0.00 | 0.99 | 0.78 | 15 | Endothelial |
| <i>BRK1</i>     | 0.88 | 0.00 | 0.00 | 0.77 | 0.29 | 15 | Endothelial |
| <i>CD63</i>     | 0.85 | 0.00 | 0.00 | 0.83 | 0.35 | 15 | Endothelial |
| <i>RPL24</i>    | 0.83 | 0.00 | 0.00 | 0.94 | 0.50 | 15 | Endothelial |
| <i>PARVB</i>    | 0.72 | 0.00 | 0.00 | 0.33 | 0.07 | 15 | Endothelial |
| <i>MAGEH1</i>   | 0.99 | 0.00 | 0.00 | 0.36 | 0.08 | 15 | Endothelial |
| <i>RAB13</i>    | 0.82 | 0.00 | 0.00 | 0.47 | 0.12 | 15 | Endothelial |
| <i>VAT1</i>     | 0.72 | 0.00 | 0.00 | 0.42 | 0.10 | 15 | Endothelial |
| <i>PIM3</i>     | 0.95 | 0.00 | 0.00 | 0.36 | 0.08 | 15 | Endothelial |
| <i>LAP3</i>     | 0.88 | 0.00 | 0.00 | 0.43 | 0.11 | 15 | Endothelial |
| <i>GJA4</i>     | 0.72 | 0.00 | 0.00 | 0.37 | 0.08 | 15 | Endothelial |
| <i>LMCD1</i>    | 0.73 | 0.00 | 0.00 | 0.36 | 0.08 | 15 | Endothelial |
| <i>GPR146</i>   | 0.80 | 0.00 | 0.00 | 0.30 | 0.06 | 15 | Endothelial |
| <i>CCNI</i>     | 0.72 | 0.00 | 0.00 | 0.63 | 0.20 | 15 | Endothelial |
| <i>GLUL</i>     | 0.99 | 0.00 | 0.00 | 0.63 | 0.22 | 15 | Endothelial |
| <i>BLOC1S1</i>  | 0.74 | 0.00 | 0.00 | 0.37 | 0.09 | 15 | Endothelial |
| <i>RHOB</i>     | 0.96 | 0.00 | 0.00 | 0.46 | 0.13 | 15 | Endothelial |

|          |      |      |      |      |      |    |             |
|----------|------|------|------|------|------|----|-------------|
| WARS     | 0.93 | 0.00 | 0.00 | 0.40 | 0.10 | 15 | Endothelial |
| AP2M1    | 0.89 | 0.00 | 0.00 | 0.54 | 0.17 | 15 | Endothelial |
| LAMTOR4  | 0.84 | 0.00 | 0.00 | 0.51 | 0.15 | 15 | Endothelial |
| RAB5C    | 0.83 | 0.00 | 0.00 | 0.49 | 0.14 | 15 | Endothelial |
| MAGED2   | 0.78 | 0.00 | 0.00 | 0.63 | 0.21 | 15 | Endothelial |
| PLXNC1   | 0.64 | 0.00 | 0.00 | 0.27 | 0.05 | 15 | Endothelial |
| CD40     | 0.66 | 0.00 | 0.00 | 0.30 | 0.06 | 15 | Endothelial |
| UQCR11   | 0.86 | 0.00 | 0.00 | 0.75 | 0.32 | 15 | Endothelial |
| HERPUD1  | 0.94 | 0.00 | 0.00 | 0.49 | 0.15 | 15 | Endothelial |
| PIN4     | 0.73 | 0.00 | 0.00 | 0.46 | 0.13 | 15 | Endothelial |
| SEC14L1  | 0.77 | 0.00 | 0.00 | 0.44 | 0.12 | 15 | Endothelial |
| PLAT     | 1.27 | 0.00 | 0.00 | 0.30 | 0.06 | 15 | Endothelial |
| WDR82    | 0.69 | 0.00 | 0.00 | 0.28 | 0.06 | 15 | Endothelial |
| EEF1D    | 0.87 | 0.00 | 0.00 | 0.70 | 0.30 | 15 | Endothelial |
| HEY1     | 0.77 | 0.00 | 0.00 | 0.27 | 0.05 | 15 | Endothelial |
| GABPB1   | 0.69 | 0.00 | 0.00 | 0.27 | 0.05 | 15 | Endothelial |
| HMGB1    | 0.72 | 0.00 | 0.00 | 0.94 | 0.62 | 15 | Endothelial |
| MT-CYB   | 0.58 | 0.00 | 0.00 | 1.00 | 0.83 | 15 | Endothelial |
| ZNF22    | 0.73 | 0.00 | 0.00 | 0.44 | 0.12 | 15 | Endothelial |
| SLC44A2  | 0.68 | 0.00 | 0.00 | 0.32 | 0.07 | 15 | Endothelial |
| UBC      | 0.82 | 0.00 | 0.00 | 0.88 | 0.51 | 15 | Endothelial |
| MYCT1    | 0.57 | 0.00 | 0.00 | 0.48 | 0.13 | 15 | Endothelial |
| SUMO2    | 0.88 | 0.00 | 0.00 | 0.75 | 0.34 | 15 | Endothelial |
| SREK1IP1 | 0.70 | 0.00 | 0.00 | 0.42 | 0.12 | 15 | Endothelial |
| HNRNPA0  | 0.76 | 0.00 | 0.00 | 0.64 | 0.24 | 15 | Endothelial |
| PET100   | 0.91 | 0.00 | 0.00 | 0.48 | 0.15 | 15 | Endothelial |
| PPA1     | 0.79 | 0.00 | 0.00 | 0.33 | 0.08 | 15 | Endothelial |
| EDF1     | 0.70 | 0.00 | 0.00 | 0.78 | 0.34 | 15 | Endothelial |
| SMIM7    | 0.80 | 0.00 | 0.00 | 0.42 | 0.12 | 15 | Endothelial |
| PALMD    | 0.66 | 0.00 | 0.00 | 0.46 | 0.13 | 15 | Endothelial |
| PAK4     | 0.63 | 0.00 | 0.00 | 0.26 | 0.05 | 15 | Endothelial |
| TNIP1    | 0.63 | 0.00 | 0.00 | 0.26 | 0.05 | 15 | Endothelial |
| DPYSL3   | 0.75 | 0.00 | 0.00 | 0.37 | 0.10 | 15 | Endothelial |
| PSMB3    | 0.70 | 0.00 | 0.00 | 0.67 | 0.27 | 15 | Endothelial |
| S100A6   | 0.51 | 0.00 | 0.00 | 0.83 | 0.35 | 15 | Endothelial |
| XRCC6    | 0.78 | 0.00 | 0.00 | 0.30 | 0.07 | 15 | Endothelial |
| ARHGEF15 | 0.56 | 0.00 | 0.00 | 0.33 | 0.08 | 15 | Endothelial |
| OST4     | 0.81 | 0.00 | 0.00 | 0.67 | 0.29 | 15 | Endothelial |
| SGK1     | 0.97 | 0.00 | 0.00 | 0.54 | 0.19 | 15 | Endothelial |
| BMPR2    | 0.70 | 0.00 | 0.00 | 0.40 | 0.11 | 15 | Endothelial |
| MDK      | 0.56 | 0.00 | 0.00 | 0.64 | 0.22 | 15 | Endothelial |
| DUSP1    | 0.90 | 0.00 | 0.00 | 0.51 | 0.17 | 15 | Endothelial |
| TSPAN12  | 0.60 | 0.00 | 0.00 | 0.31 | 0.07 | 15 | Endothelial |

|                 |      |      |      |      |      |    |             |
|-----------------|------|------|------|------|------|----|-------------|
| <i>TMEM100</i>  | 0.56 | 0.00 | 0.00 | 0.77 | 0.30 | 15 | Endothelial |
| <i>N4BP2L2</i>  | 0.69 | 0.00 | 0.00 | 0.62 | 0.23 | 15 | Endothelial |
| <i>ADAR</i>     | 0.72 | 0.00 | 0.00 | 0.30 | 0.07 | 15 | Endothelial |
| <i>PFN1</i>     | 0.69 | 0.00 | 0.00 | 0.86 | 0.49 | 15 | Endothelial |
| <i>SYNGR2</i>   | 0.72 | 0.00 | 0.00 | 0.37 | 0.10 | 15 | Endothelial |
| <i>TMBIM4</i>   | 0.73 | 0.00 | 0.00 | 0.48 | 0.16 | 15 | Endothelial |
| <i>DUSP6</i>    | 0.68 | 0.00 | 0.00 | 0.54 | 0.18 | 15 | Endothelial |
| <i>C12orf57</i> | 0.74 | 0.00 | 0.00 | 0.49 | 0.17 | 15 | Endothelial |
| <i>UACA</i>     | 0.74 | 0.00 | 0.00 | 0.47 | 0.15 | 15 | Endothelial |
| <i>PHACTR2</i>  | 0.69 | 0.00 | 0.00 | 0.46 | 0.14 | 15 | Endothelial |
| <i>RPLP2</i>    | 0.49 | 0.00 | 0.00 | 0.99 | 0.83 | 15 | Endothelial |
| <i>MEF2C</i>    | 0.57 | 0.00 | 0.00 | 0.54 | 0.18 | 15 | Endothelial |
| <i>CD34</i>     | 0.70 | 0.00 | 0.00 | 0.58 | 0.21 | 15 | Endothelial |
| <i>NUMB</i>     | 0.68 | 0.00 | 0.00 | 0.35 | 0.09 | 15 | Endothelial |
| <i>TLE4</i>     | 1.15 | 0.00 | 0.00 | 0.42 | 0.13 | 15 | Endothelial |
| <i>ZNF503</i>   | 0.84 | 0.00 | 0.00 | 0.48 | 0.16 | 15 | Endothelial |
| <i>RPL23A</i>   | 0.53 | 0.00 | 0.00 | 0.98 | 0.69 | 15 | Endothelial |
| <i>TMEM258</i>  | 0.73 | 0.00 | 0.00 | 0.74 | 0.35 | 15 | Endothelial |
| <i>RALB</i>     | 0.80 | 0.00 | 0.00 | 0.53 | 0.20 | 15 | Endothelial |
| <i>SCAND1</i>   | 0.51 | 0.00 | 0.00 | 0.52 | 0.17 | 15 | Endothelial |
| <i>PKIG</i>     | 0.60 | 0.00 | 0.00 | 0.37 | 0.10 | 15 | Endothelial |
| <i>PODXL</i>    | 0.62 | 0.00 | 0.00 | 0.40 | 0.11 | 15 | Endothelial |
| <i>NDUFB2</i>   | 0.85 | 0.00 | 0.00 | 0.58 | 0.24 | 15 | Endothelial |
| <i>SOX4</i>     | 0.85 | 0.00 | 0.00 | 0.75 | 0.40 | 15 | Endothelial |
| <i>TPRKB</i>    | 0.63 | 0.00 | 0.00 | 0.26 | 0.06 | 15 | Endothelial |
| <i>NUDT4</i>    | 0.81 | 0.00 | 0.00 | 0.47 | 0.16 | 15 | Endothelial |
| <i>TUFM</i>     | 0.65 | 0.00 | 0.00 | 0.31 | 0.08 | 15 | Endothelial |
| <i>CMTM3</i>    | 0.75 | 0.00 | 0.00 | 0.44 | 0.15 | 15 | Endothelial |
| <i>ICAM2</i>    | 0.55 | 0.00 | 0.00 | 0.52 | 0.18 | 15 | Endothelial |
| <i>PEA15</i>    | 0.62 | 0.00 | 0.00 | 0.46 | 0.15 | 15 | Endothelial |
| <i>TSPAN7</i>   | 0.52 | 0.00 | 0.00 | 0.59 | 0.22 | 15 | Endothelial |
| <i>TSC22D1</i>  | 0.80 | 0.00 | 0.00 | 0.72 | 0.35 | 15 | Endothelial |
| <i>ITM2B</i>    | 0.53 | 0.00 | 0.00 | 0.98 | 0.77 | 15 | Endothelial |
| <i>GPX3</i>     | 0.31 | 0.00 | 0.00 | 0.46 | 0.15 | 15 | Endothelial |
| <i>RGS3</i>     | 0.61 | 0.00 | 0.00 | 0.31 | 0.08 | 15 | Endothelial |
| <i>RPS19BP1</i> | 0.63 | 0.00 | 0.00 | 0.41 | 0.13 | 15 | Endothelial |
| <i>PLK2</i>     | 0.68 | 0.00 | 0.00 | 0.48 | 0.17 | 15 | Endothelial |
| <i>SNRPD2</i>   | 0.69 | 0.00 | 0.00 | 0.64 | 0.28 | 15 | Endothelial |
| <i>PIH1D1</i>   | 0.79 | 0.00 | 0.00 | 0.27 | 0.07 | 15 | Endothelial |
| <i>ANAPC16</i>  | 0.67 | 0.00 | 0.00 | 0.52 | 0.20 | 15 | Endothelial |
| <i>TMEM140</i>  | 0.59 | 0.00 | 0.00 | 0.30 | 0.08 | 15 | Endothelial |
| <i>CD36</i>     | 0.43 | 0.00 | 0.00 | 0.79 | 0.33 | 15 | Endothelial |
| <i>RAB11A</i>   | 0.65 | 0.00 | 0.00 | 0.64 | 0.28 | 15 | Endothelial |

|                  |      |      |      |      |      |    |             |
|------------------|------|------|------|------|------|----|-------------|
| <i>RBMX</i>      | 0.65 | 0.00 | 0.00 | 0.42 | 0.14 | 15 | Endothelial |
| <i>CD2BP2</i>    | 0.61 | 0.00 | 0.00 | 0.27 | 0.07 | 15 | Endothelial |
| <i>MRPS7</i>     | 0.56 | 0.00 | 0.00 | 0.30 | 0.08 | 15 | Endothelial |
| <i>FOXN3</i>     | 0.63 | 0.00 | 0.00 | 0.32 | 0.09 | 15 | Endothelial |
| <i>VPS28</i>     | 0.76 | 0.00 | 0.00 | 0.52 | 0.21 | 15 | Endothelial |
| <i>RPS13</i>     | 0.52 | 0.00 | 0.00 | 0.94 | 0.67 | 15 | Endothelial |
| <i>C1orf43</i>   | 0.69 | 0.00 | 0.00 | 0.32 | 0.09 | 15 | Endothelial |
| <i>DHRS3</i>     | 0.69 | 0.00 | 0.00 | 0.27 | 0.07 | 15 | Endothelial |
| <i>YIPF3</i>     | 0.67 | 0.00 | 0.00 | 0.42 | 0.14 | 15 | Endothelial |
| <i>GABARAPL2</i> | 0.77 | 0.00 | 0.00 | 0.58 | 0.25 | 15 | Endothelial |
| <i>MRPL51</i>    | 0.76 | 0.00 | 0.00 | 0.46 | 0.17 | 15 | Endothelial |
| <i>CNRIP1</i>    | 0.49 | 0.00 | 0.00 | 0.26 | 0.06 | 15 | Endothelial |
| <i>CDC37</i>     | 0.62 | 0.00 | 0.00 | 0.65 | 0.29 | 15 | Endothelial |
| <i>MRPS34</i>    | 0.68 | 0.00 | 0.00 | 0.33 | 0.10 | 15 | Endothelial |
| <i>PSME1</i>     | 0.70 | 0.00 | 0.00 | 0.69 | 0.34 | 15 | Endothelial |
| <i>TBX3</i>      | 0.68 | 0.00 | 0.00 | 0.56 | 0.22 | 15 | Endothelial |
| <i>SSR4</i>      | 0.59 | 0.00 | 0.00 | 0.63 | 0.27 | 15 | Endothelial |
| <i>COMMD2</i>    | 0.58 | 0.00 | 0.00 | 0.35 | 0.10 | 15 | Endothelial |
| <i>HMBOX1</i>    | 0.68 | 0.00 | 0.00 | 0.28 | 0.08 | 15 | Endothelial |
| <i>RPL7</i>      | 0.45 | 0.00 | 0.00 | 0.98 | 0.77 | 15 | Endothelial |
| <i>SPARCL1</i>   | 0.49 | 0.00 | 0.00 | 0.82 | 0.42 | 15 | Endothelial |
| <i>RGL2</i>      | 0.69 | 0.00 | 0.00 | 0.32 | 0.09 | 15 | Endothelial |
| <i>DOCK6</i>     | 0.54 | 0.00 | 0.00 | 0.27 | 0.07 | 15 | Endothelial |
| <i>ATP6V0E1</i>  | 0.64 | 0.00 | 0.00 | 0.57 | 0.23 | 15 | Endothelial |
| <i>SRSF3</i>     | 0.64 | 0.00 | 0.00 | 0.63 | 0.28 | 15 | Endothelial |
| <i>UXT</i>       | 0.62 | 0.00 | 0.00 | 0.26 | 0.07 | 15 | Endothelial |
| <i>CLIC1</i>     | 0.59 | 0.00 | 0.00 | 0.77 | 0.39 | 15 | Endothelial |
| <i>CFL1</i>      | 0.50 | 0.00 | 0.00 | 0.93 | 0.61 | 15 | Endothelial |
| <i>MYZAP</i>     | 0.47 | 0.00 | 0.00 | 0.44 | 0.15 | 15 | Endothelial |
| <i>NPR3</i>      | 0.54 | 0.00 | 0.00 | 0.37 | 0.12 | 15 | Endothelial |
| <i>ERICH1</i>    | 0.57 | 0.00 | 0.00 | 0.26 | 0.07 | 15 | Endothelial |
| <i>ARMCX3</i>    | 0.64 | 0.00 | 0.00 | 0.38 | 0.13 | 15 | Endothelial |
| <i>RPIA</i>      | 0.47 | 0.00 | 0.00 | 0.26 | 0.07 | 15 | Endothelial |
| <i>NEDD8</i>     | 0.60 | 0.00 | 0.00 | 0.68 | 0.32 | 15 | Endothelial |
| <i>C9orf16</i>   | 0.61 | 0.00 | 0.00 | 0.28 | 0.08 | 15 | Endothelial |
| <i>DDIT4</i>     | 0.63 | 0.00 | 0.00 | 0.27 | 0.07 | 15 | Endothelial |
| <i>WWTR1</i>     | 0.68 | 0.00 | 0.00 | 0.42 | 0.15 | 15 | Endothelial |
| <i>S100A4</i>    | 0.60 | 0.00 | 0.00 | 0.33 | 0.10 | 15 | Endothelial |
| <i>CLEC3B</i>    | 0.50 | 0.00 | 0.00 | 0.27 | 0.07 | 15 | Endothelial |
| <i>LPAR6</i>     | 0.60 | 0.00 | 0.00 | 0.31 | 0.09 | 15 | Endothelial |
| <i>LAMTOR1</i>   | 0.68 | 0.00 | 0.00 | 0.41 | 0.15 | 15 | Endothelial |
| <i>BTF3</i>      | 0.55 | 0.00 | 0.00 | 0.86 | 0.54 | 15 | Endothelial |
| <i>MZT2B</i>     | 0.75 | 0.00 | 0.00 | 0.30 | 0.09 | 15 | Endothelial |

|                 |      |      |      |      |      |    |             |
|-----------------|------|------|------|------|------|----|-------------|
| <i>RALA</i>     | 0.67 | 0.00 | 0.00 | 0.56 | 0.24 | 15 | Endothelial |
| <i>PARK7</i>    | 0.62 | 0.00 | 0.00 | 0.62 | 0.28 | 15 | Endothelial |
| <i>DGKZ</i>     | 0.55 | 0.00 | 0.00 | 0.28 | 0.08 | 15 | Endothelial |
| <i>ZNHIT1</i>   | 0.62 | 0.00 | 0.00 | 0.43 | 0.16 | 15 | Endothelial |
| <i>LSM3</i>     | 0.61 | 0.00 | 0.00 | 0.37 | 0.13 | 15 | Endothelial |
| <i>TPST2</i>    | 0.46 | 0.00 | 0.00 | 0.37 | 0.12 | 15 | Endothelial |
| <i>RALY</i>     | 0.62 | 0.00 | 0.00 | 0.40 | 0.14 | 15 | Endothelial |
| <i>FIS1</i>     | 0.66 | 0.00 | 0.00 | 0.63 | 0.30 | 15 | Endothelial |
| <i>NDRG2</i>    | 0.49 | 0.00 | 0.00 | 0.31 | 0.09 | 15 | Endothelial |
| <i>NDUFS5</i>   | 0.53 | 0.00 | 0.00 | 0.61 | 0.27 | 15 | Endothelial |
| <i>ARPC3</i>    | 0.60 | 0.00 | 0.00 | 0.63 | 0.29 | 15 | Endothelial |
| <i>MRPL22</i>   | 0.64 | 0.00 | 0.00 | 0.26 | 0.07 | 15 | Endothelial |
| <i>RTN4</i>     | 0.64 | 0.00 | 0.00 | 0.59 | 0.27 | 15 | Endothelial |
| <i>PSMB7</i>    | 0.72 | 0.00 | 0.00 | 0.37 | 0.13 | 15 | Endothelial |
| <i>LAPTM4A</i>  | 0.60 | 0.00 | 0.00 | 0.85 | 0.55 | 15 | Endothelial |
| <i>PTTG1IP</i>  | 0.57 | 0.00 | 0.00 | 0.47 | 0.18 | 15 | Endothelial |
| <i>ITGB1BP1</i> | 0.47 | 0.00 | 0.00 | 0.27 | 0.08 | 15 | Endothelial |
| <i>DDX17</i>    | 0.63 | 0.00 | 0.00 | 0.57 | 0.26 | 15 | Endothelial |
| <i>ADCY4</i>    | 0.64 | 0.00 | 0.00 | 0.30 | 0.09 | 15 | Endothelial |
| <i>PNKD</i>     | 0.58 | 0.00 | 0.00 | 0.33 | 0.11 | 15 | Endothelial |
| <i>SAP30BP</i>  | 0.42 | 0.00 | 0.00 | 0.26 | 0.07 | 15 | Endothelial |
| <i>NDFIP1</i>   | 0.60 | 0.00 | 0.00 | 0.33 | 0.11 | 15 | Endothelial |
| <i>TMEM204</i>  | 0.54 | 0.00 | 0.00 | 0.44 | 0.17 | 15 | Endothelial |
| <i>DECR1</i>    | 0.54 | 0.00 | 0.00 | 0.28 | 0.08 | 15 | Endothelial |
| <i>FNBP1</i>    | 0.50 | 0.00 | 0.00 | 0.31 | 0.09 | 15 | Endothelial |
| <i>AES</i>      | 0.76 | 0.00 | 0.00 | 0.41 | 0.16 | 15 | Endothelial |
| <i>TGM2</i>     | 0.58 | 0.00 | 0.00 | 0.33 | 0.11 | 15 | Endothelial |
| <i>UQCRQ</i>    | 0.53 | 0.00 | 0.00 | 0.72 | 0.36 | 15 | Endothelial |
| <i>TIMM22</i>   | 0.57 | 0.00 | 0.00 | 0.27 | 0.08 | 15 | Endothelial |
| <i>PTBP1</i>    | 0.55 | 0.00 | 0.00 | 0.28 | 0.09 | 15 | Endothelial |
| <i>S100A13</i>  | 0.74 | 0.00 | 0.00 | 0.57 | 0.27 | 15 | Endothelial |
| <i>GIMAP1</i>   | 0.33 | 0.00 | 0.00 | 0.41 | 0.14 | 15 | Endothelial |
| <i>JUN</i>      | 0.67 | 0.00 | 0.00 | 0.70 | 0.38 | 15 | Endothelial |
| <i>RNPS1</i>    | 0.56 | 0.00 | 0.00 | 0.42 | 0.16 | 15 | Endothelial |
| <i>ACTN4</i>    | 0.48 | 0.00 | 0.00 | 0.64 | 0.30 | 15 | Endothelial |
| <i>BRI3</i>     | 0.56 | 0.00 | 0.00 | 0.51 | 0.21 | 15 | Endothelial |
| <i>SDCBP</i>    | 0.52 | 0.00 | 0.00 | 0.63 | 0.29 | 15 | Endothelial |
| <i>NDUFA11</i>  | 0.68 | 0.00 | 0.00 | 0.59 | 0.30 | 15 | Endothelial |
| <i>LAMTOR2</i>  | 0.64 | 0.00 | 0.00 | 0.42 | 0.16 | 15 | Endothelial |
| <i>SRSF7</i>    | 0.55 | 0.00 | 0.00 | 0.44 | 0.18 | 15 | Endothelial |
| <i>PSMB8</i>    | 0.43 | 0.00 | 0.00 | 0.48 | 0.19 | 15 | Endothelial |
| <i>DNAJC15</i>  | 0.51 | 0.00 | 0.00 | 0.28 | 0.09 | 15 | Endothelial |
| <i>ACADVL</i>   | 0.59 | 0.00 | 0.00 | 0.31 | 0.10 | 15 | Endothelial |

|                |      |      |      |      |      |    |             |
|----------------|------|------|------|------|------|----|-------------|
| <i>NOSIP</i>   | 0.57 | 0.00 | 0.00 | 0.30 | 0.10 | 15 | Endothelial |
| <i>PLXND1</i>  | 0.54 | 0.00 | 0.00 | 0.27 | 0.08 | 15 | Endothelial |
| <i>ALDOA</i>   | 0.54 | 0.00 | 0.00 | 0.52 | 0.23 | 15 | Endothelial |
| <i>EIF1</i>    | 0.46 | 0.00 | 0.00 | 0.94 | 0.69 | 15 | Endothelial |
| <i>PPP2R5A</i> | 0.50 | 0.00 | 0.00 | 0.38 | 0.14 | 15 | Endothelial |
| <i>TMEM109</i> | 0.63 | 0.00 | 0.00 | 0.36 | 0.14 | 15 | Endothelial |
| <i>XAF1</i>    | 0.52 | 0.00 | 0.00 | 0.27 | 0.08 | 15 | Endothelial |
| <i>SKAP2</i>   | 0.60 | 0.00 | 0.00 | 0.37 | 0.14 | 15 | Endothelial |
| <i>NECAP2</i>  | 0.56 | 0.00 | 0.00 | 0.31 | 0.10 | 15 | Endothelial |
| <i>PHPT1</i>   | 0.53 | 0.00 | 0.00 | 0.36 | 0.13 | 15 | Endothelial |
| <i>SOX17</i>   | 0.30 | 0.00 | 0.00 | 0.40 | 0.14 | 15 | Endothelial |
| <i>COPZ1</i>   | 0.49 | 0.00 | 0.00 | 0.36 | 0.13 | 15 | Endothelial |
| <i>SAP18</i>   | 0.49 | 0.00 | 0.00 | 0.63 | 0.32 | 15 | Endothelial |
| <i>MT-ATP6</i> | 0.35 | 0.00 | 0.00 | 0.98 | 0.85 | 15 | Endothelial |
| <i>MEIS2</i>   | 0.61 | 0.00 | 0.00 | 0.33 | 0.12 | 15 | Endothelial |
| <i>RNF7</i>    | 0.52 | 0.00 | 0.00 | 0.54 | 0.25 | 15 | Endothelial |
| <i>TMEM165</i> | 0.56 | 0.00 | 0.00 | 0.33 | 0.12 | 15 | Endothelial |
| <i>CFLAR</i>   | 0.55 | 0.00 | 0.00 | 0.46 | 0.20 | 15 | Endothelial |
| <i>SEC11A</i>  | 0.46 | 0.00 | 0.00 | 0.48 | 0.21 | 15 | Endothelial |
| <i>BTG1</i>    | 0.53 | 0.00 | 0.00 | 0.61 | 0.31 | 15 | Endothelial |
| <i>FKBP2</i>   | 0.58 | 0.00 | 0.00 | 0.46 | 0.20 | 15 | Endothelial |
| <i>CD151</i>   | 0.54 | 0.00 | 0.00 | 0.46 | 0.20 | 15 | Endothelial |
| <i>PSMB10</i>  | 0.48 | 0.00 | 0.00 | 0.37 | 0.14 | 15 | Endothelial |
| <i>SPTAN1</i>  | 0.37 | 0.00 | 0.00 | 0.43 | 0.17 | 15 | Endothelial |
| <i>AP2S1</i>   | 0.58 | 0.00 | 0.00 | 0.44 | 0.20 | 15 | Endothelial |
| <i>THBD</i>    | 0.36 | 0.00 | 0.00 | 0.58 | 0.26 | 15 | Endothelial |
| <i>NCKAP5</i>  | 0.56 | 0.00 | 0.00 | 0.35 | 0.13 | 15 | Endothelial |
| <i>OFD1</i>    | 0.38 | 0.00 | 0.00 | 0.26 | 0.08 | 15 | Endothelial |
| <i>TERF2IP</i> | 0.56 | 0.00 | 0.00 | 0.26 | 0.08 | 15 | Endothelial |
| <i>NDUFB4</i>  | 0.52 | 0.00 | 0.00 | 0.54 | 0.26 | 15 | Endothelial |
| <i>BSG</i>     | 0.40 | 0.00 | 0.00 | 0.74 | 0.39 | 15 | Endothelial |
| <i>TJP1</i>    | 0.30 | 0.00 | 0.00 | 0.44 | 0.18 | 15 | Endothelial |
| <i>DAZAP2</i>  | 0.54 | 0.00 | 0.00 | 0.49 | 0.22 | 15 | Endothelial |
| <i>TMBIM6</i>  | 0.44 | 0.00 | 0.00 | 0.74 | 0.41 | 15 | Endothelial |
| <i>HPCAL1</i>  | 0.54 | 0.00 | 0.00 | 0.38 | 0.15 | 15 | Endothelial |
| <i>METTL9</i>  | 0.44 | 0.00 | 0.00 | 0.36 | 0.14 | 15 | Endothelial |
| <i>IL6ST</i>   | 0.61 | 0.00 | 0.00 | 0.28 | 0.10 | 15 | Endothelial |
| <i>LSM2</i>    | 0.51 | 0.00 | 0.00 | 0.28 | 0.10 | 15 | Endothelial |
| <i>HSPE1</i>   | 0.56 | 0.00 | 0.00 | 0.59 | 0.30 | 15 | Endothelial |
| <i>PON2</i>    | 0.54 | 0.00 | 0.00 | 0.37 | 0.15 | 15 | Endothelial |
| <i>SCARB2</i>  | 0.48 | 0.00 | 0.00 | 0.26 | 0.09 | 15 | Endothelial |
| <i>RBCK1</i>   | 0.42 | 0.00 | 0.00 | 0.27 | 0.09 | 15 | Endothelial |
| <i>ELK3</i>    | 0.37 | 0.00 | 0.00 | 0.37 | 0.14 | 15 | Endothelial |

|                   |      |      |      |      |      |    |             |
|-------------------|------|------|------|------|------|----|-------------|
| <i>TNFRSF1A</i>   | 0.51 | 0.00 | 0.00 | 0.36 | 0.14 | 15 | Endothelial |
| <i>CRIP2</i>      | 0.31 | 0.00 | 0.00 | 0.82 | 0.44 | 15 | Endothelial |
| <i>H2AFZ</i>      | 0.48 | 0.00 | 0.00 | 0.69 | 0.41 | 15 | Endothelial |
| <i>POLR2C</i>     | 0.46 | 0.00 | 0.00 | 0.36 | 0.14 | 15 | Endothelial |
| <i>FLI1</i>       | 0.45 | 0.00 | 0.00 | 0.32 | 0.12 | 15 | Endothelial |
| <i>VIM</i>        | 0.46 | 0.00 | 0.00 | 0.95 | 0.69 | 15 | Endothelial |
| <i>LSM7</i>       | 0.45 | 0.00 | 0.00 | 0.41 | 0.17 | 15 | Endothelial |
| <i>SRSF9</i>      | 0.39 | 0.00 | 0.00 | 0.33 | 0.13 | 15 | Endothelial |
| <i>GLO1</i>       | 0.53 | 0.00 | 0.00 | 0.37 | 0.15 | 15 | Endothelial |
| <i>GSTK1</i>      | 0.57 | 0.00 | 0.00 | 0.27 | 0.10 | 15 | Endothelial |
| <i>UBE2D2</i>     | 0.47 | 0.00 | 0.00 | 0.44 | 0.20 | 15 | Endothelial |
| <i>GADD45GIP1</i> | 0.54 | 0.00 | 0.00 | 0.41 | 0.18 | 15 | Endothelial |
| <i>COMMD7</i>     | 0.35 | 0.00 | 0.00 | 0.30 | 0.11 | 15 | Endothelial |
| <i>EMP3</i>       | 0.37 | 0.00 | 0.00 | 0.52 | 0.24 | 15 | Endothelial |
| <i>SNRPC</i>      | 0.47 | 0.00 | 0.00 | 0.41 | 0.18 | 15 | Endothelial |
| <i>VAPA</i>       | 0.50 | 0.00 | 0.00 | 0.49 | 0.24 | 15 | Endothelial |
| <i>PTPRM</i>      | 0.50 | 0.00 | 0.00 | 0.27 | 0.10 | 15 | Endothelial |
| <i>RAD23A</i>     | 0.53 | 0.00 | 0.00 | 0.35 | 0.14 | 15 | Endothelial |
| <i>MAPK3</i>      | 0.41 | 0.00 | 0.00 | 0.35 | 0.14 | 15 | Endothelial |
| <i>RBPJ</i>       | 0.41 | 0.00 | 0.00 | 0.31 | 0.12 | 15 | Endothelial |
| <i>NACA</i>       | 0.42 | 0.00 | 0.00 | 0.86 | 0.61 | 15 | Endothelial |
| <i>BANF1</i>      | 0.35 | 0.00 | 0.01 | 0.59 | 0.29 | 15 | Endothelial |
| <i>POLR2K</i>     | 0.34 | 0.00 | 0.01 | 0.36 | 0.15 | 15 | Endothelial |
| <i>ITGA6</i>      | 0.31 | 0.00 | 0.01 | 0.33 | 0.13 | 15 | Endothelial |
| <i>ARID1B</i>     | 0.45 | 0.00 | 0.01 | 0.26 | 0.09 | 15 | Endothelial |
| <i>RNF13</i>      | 0.42 | 0.00 | 0.01 | 0.28 | 0.11 | 15 | Endothelial |
| <i>ENSA</i>       | 0.42 | 0.00 | 0.01 | 0.35 | 0.14 | 15 | Endothelial |
| <i>TMEM50B</i>    | 0.37 | 0.00 | 0.01 | 0.26 | 0.09 | 15 | Endothelial |
| <i>JTB</i>        | 0.42 | 0.00 | 0.01 | 0.44 | 0.20 | 15 | Endothelial |
| <i>EFEMP2</i>     | 0.47 | 0.00 | 0.01 | 0.26 | 0.09 | 15 | Endothelial |
| <i>PDCD6</i>      | 0.49 | 0.00 | 0.01 | 0.38 | 0.17 | 15 | Endothelial |
| <i>EIF3G</i>      | 0.44 | 0.00 | 0.01 | 0.44 | 0.21 | 15 | Endothelial |
| <i>APRT</i>       | 0.41 | 0.00 | 0.01 | 0.42 | 0.19 | 15 | Endothelial |
| <i>HSBP1</i>      | 0.42 | 0.00 | 0.01 | 0.61 | 0.33 | 15 | Endothelial |
| <i>NDUFA1</i>     | 0.40 | 0.00 | 0.01 | 0.62 | 0.33 | 15 | Endothelial |
| <i>EID1</i>       | 0.35 | 0.00 | 0.01 | 0.63 | 0.33 | 15 | Endothelial |
| <i>CTDSP1</i>     | 0.46 | 0.00 | 0.01 | 0.26 | 0.10 | 15 | Endothelial |
| <i>COL4A2</i>     | 0.32 | 0.00 | 0.01 | 0.77 | 0.45 | 15 | Endothelial |
| <i>NOP10</i>      | 0.44 | 0.00 | 0.01 | 0.54 | 0.29 | 15 | Endothelial |
| <i>TIMM8B</i>     | 0.39 | 0.00 | 0.01 | 0.43 | 0.20 | 15 | Endothelial |
| <i>NUCB1</i>      | 0.43 | 0.00 | 0.01 | 0.37 | 0.16 | 15 | Endothelial |
| <i>ZFP36L1</i>    | 0.36 | 0.00 | 0.01 | 0.75 | 0.47 | 15 | Endothelial |
| <i>PNRC1</i>      | 0.38 | 0.00 | 0.01 | 0.47 | 0.23 | 15 | Endothelial |

|                 |      |      |      |      |      |    |             |
|-----------------|------|------|------|------|------|----|-------------|
| <i>TOMM7</i>    | 0.45 | 0.00 | 0.01 | 0.68 | 0.40 | 15 | Endothelial |
| <i>ECHS1</i>    | 0.40 | 0.00 | 0.01 | 0.37 | 0.16 | 15 | Endothelial |
| <i>SRP9</i>     | 0.49 | 0.00 | 0.01 | 0.56 | 0.31 | 15 | Endothelial |
| <i>NDUFS7</i>   | 0.42 | 0.00 | 0.02 | 0.41 | 0.19 | 15 | Endothelial |
| <i>CIB1</i>     | 0.42 | 0.00 | 0.02 | 0.32 | 0.13 | 15 | Endothelial |
| <i>PGAM1</i>    | 0.50 | 0.00 | 0.02 | 0.32 | 0.14 | 15 | Endothelial |
| <i>ADRM1</i>    | 0.50 | 0.00 | 0.02 | 0.32 | 0.14 | 15 | Endothelial |
| <i>NAA10</i>    | 0.43 | 0.00 | 0.02 | 0.27 | 0.11 | 15 | Endothelial |
| <i>SH3BGRL3</i> | 0.25 | 0.00 | 0.02 | 0.67 | 0.36 | 15 | Endothelial |
| <i>ZEB1</i>     | 0.32 | 0.00 | 0.02 | 0.30 | 0.12 | 15 | Endothelial |
| <i>SSR2</i>     | 0.42 | 0.00 | 0.03 | 0.61 | 0.34 | 15 | Endothelial |
| <i>MYO6</i>     | 0.51 | 0.00 | 0.03 | 0.32 | 0.14 | 15 | Endothelial |
| <i>SIVA1</i>    | 0.42 | 0.00 | 0.03 | 0.36 | 0.16 | 15 | Endothelial |
| <i>CCDC124</i>  | 0.44 | 0.00 | 0.03 | 0.28 | 0.12 | 15 | Endothelial |
| <i>RAB11B</i>   | 0.41 | 0.00 | 0.03 | 0.44 | 0.22 | 15 | Endothelial |
| <i>FKBP8</i>    | 0.47 | 0.00 | 0.04 | 0.35 | 0.16 | 15 | Endothelial |
| <i>SEC61G</i>   | 0.35 | 0.00 | 0.04 | 0.67 | 0.38 | 15 | Endothelial |
| <i>POMP</i>     | 0.32 | 0.00 | 0.04 | 0.62 | 0.34 | 15 | Endothelial |
| <i>RABAC1</i>   | 0.36 | 0.00 | 0.04 | 0.57 | 0.30 | 15 | Endothelial |
| <i>DARS</i>     | 0.45 | 0.00 | 0.04 | 0.26 | 0.10 | 15 | Endothelial |
| <i>PSME2</i>    | 0.47 | 0.00 | 0.05 | 0.48 | 0.26 | 15 | Endothelial |
| <i>POLR2G</i>   | 0.45 | 0.00 | 0.05 | 0.33 | 0.15 | 15 | Endothelial |
| <i>IER2</i>     | 0.45 | 0.00 | 0.05 | 0.48 | 0.26 | 15 | Endothelial |
| <i>DCTN6</i>    | 0.38 | 0.00 | 0.05 | 0.30 | 0.12 | 15 | Endothelial |
| <i>GZMB</i>     | 3.89 | 0.00 | 0.00 | 0.61 | 0.00 | 16 | NK Cell     |
| <i>PRF1</i>     | 3.52 | 0.00 | 0.00 | 0.71 | 0.00 | 16 | NK Cell     |
| <i>KLRB1</i>    | 3.34 | 0.00 | 0.00 | 0.84 | 0.01 | 16 | NK Cell     |
| <i>XCL2</i>     | 3.16 | 0.00 | 0.00 | 0.47 | 0.00 | 16 | NK Cell     |
| <i>CD7</i>      | 3.04 | 0.00 | 0.00 | 0.95 | 0.01 | 16 | NK Cell     |
| <i>CTSW</i>     | 2.99 | 0.00 | 0.00 | 0.84 | 0.02 | 16 | NK Cell     |
| <i>CST7</i>     | 2.86 | 0.00 | 0.00 | 0.74 | 0.01 | 16 | NK Cell     |
| <i>ITGB2</i>    | 2.49 | 0.00 | 0.00 | 0.71 | 0.01 | 16 | NK Cell     |
| <i>GZMM</i>     | 2.45 | 0.00 | 0.00 | 0.76 | 0.01 | 16 | NK Cell     |
| <i>TBX21</i>    | 1.73 | 0.00 | 0.00 | 0.42 | 0.00 | 16 | NK Cell     |
| <i>SAMD3</i>    | 1.59 | 0.00 | 0.00 | 0.45 | 0.01 | 16 | NK Cell     |
| <i>CD247</i>    | 2.53 | 0.00 | 0.00 | 0.76 | 0.02 | 16 | NK Cell     |
| <i>HSH2D</i>    | 1.35 | 0.00 | 0.00 | 0.26 | 0.00 | 16 | NK Cell     |
| <i>GZMA</i>     | 2.35 | 0.00 | 0.00 | 0.63 | 0.01 | 16 | NK Cell     |
| <i>NKG7</i>     | 3.72 | 0.00 | 0.00 | 0.84 | 0.02 | 16 | NK Cell     |
| <i>MATK</i>     | 2.01 | 0.00 | 0.00 | 0.55 | 0.01 | 16 | NK Cell     |
| <i>KLRD1</i>    | 2.53 | 0.00 | 0.00 | 0.66 | 0.02 | 16 | NK Cell     |
| <i>TRGC1</i>    | 1.28 | 0.00 | 0.00 | 0.29 | 0.00 | 16 | NK Cell     |
| <i>CD160</i>    | 1.96 | 0.00 | 0.00 | 0.40 | 0.01 | 16 | NK Cell     |

|                 |      |      |      |      |      |    |         |
|-----------------|------|------|------|------|------|----|---------|
| <i>AOAH</i>     | 1.66 | 0.00 | 0.00 | 0.37 | 0.01 | 16 | NK Cell |
| <i>CD96</i>     | 1.26 | 0.00 | 0.00 | 0.32 | 0.01 | 16 | NK Cell |
| <i>MYBL1</i>    | 1.25 | 0.00 | 0.00 | 0.32 | 0.01 | 16 | NK Cell |
| <i>SYTL1</i>    | 1.49 | 0.00 | 0.00 | 0.32 | 0.01 | 16 | NK Cell |
| <i>IL2RB</i>    | 1.54 | 0.00 | 0.00 | 0.34 | 0.01 | 16 | NK Cell |
| <i>ZAP70</i>    | 1.32 | 0.00 | 0.00 | 0.40 | 0.01 | 16 | NK Cell |
| <i>LCK</i>      | 1.89 | 0.00 | 0.00 | 0.66 | 0.03 | 16 | NK Cell |
| <i>AAK1</i>     | 1.91 | 0.00 | 0.00 | 0.61 | 0.02 | 16 | NK Cell |
| <i>TXK</i>      | 1.54 | 0.00 | 0.00 | 0.37 | 0.01 | 16 | NK Cell |
| <i>GIMAP7</i>   | 2.02 | 0.00 | 0.00 | 0.63 | 0.03 | 16 | NK Cell |
| <i>CCL4</i>     | 3.56 | 0.00 | 0.00 | 0.42 | 0.01 | 16 | NK Cell |
| <i>TSTD1</i>    | 1.35 | 0.00 | 0.00 | 0.34 | 0.01 | 16 | NK Cell |
| <i>DOK2</i>     | 1.68 | 0.00 | 0.00 | 0.50 | 0.02 | 16 | NK Cell |
| <i>HCST</i>     | 2.43 | 0.00 | 0.00 | 0.74 | 0.04 | 16 | NK Cell |
| <i>TRBC1</i>    | 2.15 | 0.00 | 0.00 | 0.71 | 0.04 | 16 | NK Cell |
| <i>ACAP1</i>    | 1.61 | 0.00 | 0.00 | 0.45 | 0.02 | 16 | NK Cell |
| <i>HSPA1A</i>   | 2.99 | 0.00 | 0.00 | 0.79 | 0.05 | 16 | NK Cell |
| <i>HAVCR2</i>   | 1.91 | 0.00 | 0.00 | 0.40 | 0.01 | 16 | NK Cell |
| <i>FCGR3A</i>   | 2.45 | 0.00 | 0.00 | 0.53 | 0.02 | 16 | NK Cell |
| <i>CCL5</i>     | 2.11 | 0.00 | 0.00 | 0.45 | 0.02 | 16 | NK Cell |
| <i>S1PR5</i>    | 1.36 | 0.00 | 0.00 | 0.29 | 0.01 | 16 | NK Cell |
| <i>SH2D2A</i>   | 1.45 | 0.00 | 0.00 | 0.29 | 0.01 | 16 | NK Cell |
| <i>CD3D</i>     | 1.96 | 0.00 | 0.00 | 0.55 | 0.03 | 16 | NK Cell |
| <i>CD48</i>     | 1.80 | 0.00 | 0.00 | 0.63 | 0.05 | 16 | NK Cell |
| <i>PTPN4</i>    | 1.33 | 0.00 | 0.00 | 0.37 | 0.02 | 16 | NK Cell |
| <i>RUNX3</i>    | 1.26 | 0.00 | 0.00 | 0.34 | 0.02 | 16 | NK Cell |
| <i>CLEC2D</i>   | 1.54 | 0.00 | 0.00 | 0.45 | 0.03 | 16 | NK Cell |
| <i>BIN2</i>     | 1.80 | 0.00 | 0.00 | 0.58 | 0.05 | 16 | NK Cell |
| <i>ADA</i>      | 1.08 | 0.00 | 0.00 | 0.29 | 0.01 | 16 | NK Cell |
| <i>SH2D1A</i>   | 0.91 | 0.00 | 0.00 | 0.26 | 0.01 | 16 | NK Cell |
| <i>CORO1A</i>   | 2.10 | 0.00 | 0.00 | 0.79 | 0.10 | 16 | NK Cell |
| <i>IFITM2</i>   | 1.87 | 0.00 | 0.00 | 0.74 | 0.08 | 16 | NK Cell |
| <i>TBC1D10C</i> | 1.37 | 0.00 | 0.00 | 0.45 | 0.03 | 16 | NK Cell |
| <i>CD3E</i>     | 1.27 | 0.00 | 0.00 | 0.32 | 0.02 | 16 | NK Cell |
| <i>UBL5</i>     | 1.73 | 0.00 | 0.00 | 0.63 | 0.07 | 16 | NK Cell |
| <i>RHOF</i>     | 1.14 | 0.00 | 0.00 | 0.29 | 0.02 | 16 | NK Cell |
| <i>AKNA</i>     | 1.50 | 0.00 | 0.00 | 0.42 | 0.03 | 16 | NK Cell |
| <i>GADD45B</i>  | 1.93 | 0.00 | 0.00 | 0.74 | 0.10 | 16 | NK Cell |
| <i>MYO1F</i>    | 1.58 | 0.00 | 0.00 | 0.42 | 0.03 | 16 | NK Cell |
| <i>IL16</i>     | 1.41 | 0.00 | 0.00 | 0.40 | 0.03 | 16 | NK Cell |
| <i>RAC2</i>     | 1.64 | 0.00 | 0.00 | 0.76 | 0.11 | 16 | NK Cell |
| <i>EVL</i>      | 1.81 | 0.00 | 0.00 | 0.68 | 0.09 | 16 | NK Cell |
| <i>TTC38</i>    | 1.35 | 0.00 | 0.00 | 0.34 | 0.02 | 16 | NK Cell |

|                 |      |      |      |      |      |    |         |
|-----------------|------|------|------|------|------|----|---------|
| <i>DUSP2</i>    | 1.27 | 0.00 | 0.00 | 0.32 | 0.02 | 16 | NK Cell |
| <i>GAPDH</i>    | 2.20 | 0.00 | 0.00 | 0.92 | 0.20 | 16 | NK Cell |
| <i>RHOH</i>     | 1.29 | 0.00 | 0.00 | 0.29 | 0.02 | 16 | NK Cell |
| <i>BID</i>      | 0.98 | 0.00 | 0.00 | 0.34 | 0.02 | 16 | NK Cell |
| <i>CD3G</i>     | 1.23 | 0.00 | 0.00 | 0.42 | 0.03 | 16 | NK Cell |
| <i>PSMB9</i>    | 1.58 | 0.00 | 0.00 | 0.68 | 0.10 | 16 | NK Cell |
| <i>ARHGDIB</i>  | 1.58 | 0.00 | 0.00 | 0.90 | 0.17 | 16 | NK Cell |
| <i>RPL29</i>    | 2.04 | 0.00 | 0.00 | 0.90 | 0.20 | 16 | NK Cell |
| <i>FMNL1</i>    | 1.30 | 0.00 | 0.00 | 0.37 | 0.03 | 16 | NK Cell |
| <i>RNF213</i>   | 1.42 | 0.00 | 0.00 | 0.47 | 0.05 | 16 | NK Cell |
| <i>C1orf56</i>  | 1.39 | 0.00 | 0.00 | 0.26 | 0.02 | 16 | NK Cell |
| <i>ZFP36L2</i>  | 1.84 | 0.00 | 0.00 | 0.76 | 0.14 | 16 | NK Cell |
| <i>RASAL3</i>   | 0.98 | 0.00 | 0.00 | 0.26 | 0.02 | 16 | NK Cell |
| <i>TGFB1</i>    | 1.32 | 0.00 | 0.00 | 0.42 | 0.04 | 16 | NK Cell |
| <i>EIF2S3</i>   | 1.11 | 0.00 | 0.00 | 0.32 | 0.03 | 16 | NK Cell |
| <i>GATA3</i>    | 1.15 | 0.00 | 0.00 | 0.32 | 0.03 | 16 | NK Cell |
| <i>IL2RG</i>    | 1.49 | 0.00 | 0.00 | 0.63 | 0.09 | 16 | NK Cell |
| <i>SPON2</i>    | 1.94 | 0.00 | 0.00 | 0.55 | 0.08 | 16 | NK Cell |
| <i>FCER1G</i>   | 1.22 | 0.00 | 0.00 | 0.74 | 0.12 | 16 | NK Cell |
| <i>ARHGAP4</i>  | 1.08 | 0.00 | 0.00 | 0.32 | 0.03 | 16 | NK Cell |
| <i>DNAJB1</i>   | 1.62 | 0.00 | 0.00 | 0.50 | 0.07 | 16 | NK Cell |
| <i>PTPRC</i>    | 1.22 | 0.00 | 0.00 | 0.79 | 0.14 | 16 | NK Cell |
| <i>CD27</i>     | 1.45 | 0.00 | 0.00 | 0.29 | 0.02 | 16 | NK Cell |
| <i>UXT</i>      | 1.26 | 0.00 | 0.00 | 0.50 | 0.07 | 16 | NK Cell |
| <i>C19orf66</i> | 1.47 | 0.00 | 0.00 | 0.42 | 0.05 | 16 | NK Cell |
| <i>DEF6</i>     | 1.15 | 0.00 | 0.00 | 0.32 | 0.03 | 16 | NK Cell |
| <i>CD74</i>     | 1.04 | 0.00 | 0.00 | 0.79 | 0.15 | 16 | NK Cell |
| <i>JUNB</i>     | 1.67 | 0.00 | 0.00 | 0.84 | 0.21 | 16 | NK Cell |
| <i>FOSB</i>     | 1.37 | 0.00 | 0.00 | 0.34 | 0.03 | 16 | NK Cell |
| <i>CD53</i>     | 1.51 | 0.00 | 0.00 | 0.58 | 0.09 | 16 | NK Cell |
| <i>B2M</i>      | 2.48 | 0.00 | 0.00 | 1.00 | 0.70 | 16 | NK Cell |
| <i>IRF1</i>     | 1.60 | 0.00 | 0.00 | 0.55 | 0.09 | 16 | NK Cell |
| <i>EVI2A</i>    | 1.05 | 0.00 | 0.00 | 0.34 | 0.03 | 16 | NK Cell |
| <i>TYROBP</i>   | 1.05 | 0.00 | 0.00 | 0.71 | 0.13 | 16 | NK Cell |
| <i>PPIA</i>     | 1.65 | 0.00 | 0.00 | 0.82 | 0.22 | 16 | NK Cell |
| <i>LEF1</i>     | 1.09 | 0.00 | 0.00 | 0.37 | 0.04 | 16 | NK Cell |
| <i>FYN</i>      | 1.26 | 0.00 | 0.00 | 0.58 | 0.10 | 16 | NK Cell |
| <i>ARL4C</i>    | 1.38 | 0.00 | 0.00 | 0.55 | 0.09 | 16 | NK Cell |
| <i>HEXIM1</i>   | 1.60 | 0.00 | 0.00 | 0.61 | 0.12 | 16 | NK Cell |
| <i>GPSM3</i>    | 1.18 | 0.00 | 0.00 | 0.45 | 0.06 | 16 | NK Cell |
| <i>LIMD2</i>    | 1.44 | 0.00 | 0.00 | 0.71 | 0.15 | 16 | NK Cell |
| <i>RPL13A</i>   | 1.90 | 0.00 | 0.00 | 1.00 | 0.59 | 16 | NK Cell |
| <i>PCSK7</i>    | 1.22 | 0.00 | 0.00 | 0.37 | 0.04 | 16 | NK Cell |

|                 |      |      |      |      |      |    |         |
|-----------------|------|------|------|------|------|----|---------|
| <i>PTPN7</i>    | 0.99 | 0.00 | 0.00 | 0.29 | 0.03 | 16 | NK Cell |
| <i>PPP1R18</i>  | 1.17 | 0.00 | 0.00 | 0.47 | 0.07 | 16 | NK Cell |
| <i>TAGAP</i>    | 1.24 | 0.00 | 0.00 | 0.34 | 0.04 | 16 | NK Cell |
| <i>RASSF5</i>   | 1.05 | 0.00 | 0.00 | 0.34 | 0.04 | 16 | NK Cell |
| <i>TUFM</i>     | 1.20 | 0.00 | 0.00 | 0.50 | 0.08 | 16 | NK Cell |
| <i>CYBA</i>     | 1.53 | 0.00 | 0.00 | 0.92 | 0.32 | 16 | NK Cell |
| <i>WIPF1</i>    | 1.16 | 0.00 | 0.00 | 0.55 | 0.10 | 16 | NK Cell |
| <i>XRCC5</i>    | 1.27 | 0.00 | 0.00 | 0.42 | 0.06 | 16 | NK Cell |
| <i>IER2</i>     | 1.88 | 0.00 | 0.00 | 0.82 | 0.26 | 16 | NK Cell |
| <i>SIAH2</i>    | 1.01 | 0.00 | 0.00 | 0.26 | 0.02 | 16 | NK Cell |
| <i>TRAF3IP3</i> | 1.20 | 0.00 | 0.00 | 0.32 | 0.03 | 16 | NK Cell |
| <i>VAMP2</i>    | 1.39 | 0.00 | 0.00 | 0.53 | 0.10 | 16 | NK Cell |
| <i>GYPC</i>     | 1.27 | 0.00 | 0.00 | 0.45 | 0.07 | 16 | NK Cell |
| <i>TMSB4X</i>   | 1.40 | 0.00 | 0.00 | 1.00 | 0.90 | 16 | NK Cell |
| <i>CHST12</i>   | 1.39 | 0.00 | 0.00 | 0.37 | 0.05 | 16 | NK Cell |
| <i>CMC1</i>     | 1.93 | 0.00 | 0.00 | 0.53 | 0.10 | 16 | NK Cell |
| <i>SEPT1</i>    | 1.08 | 0.00 | 0.00 | 0.34 | 0.04 | 16 | NK Cell |
| <i>PLAC8</i>    | 0.82 | 0.00 | 0.00 | 0.74 | 0.17 | 16 | NK Cell |
| <i>APMAP</i>    | 1.29 | 0.00 | 0.00 | 0.40 | 0.06 | 16 | NK Cell |
| <i>LAPTM5</i>   | 0.98 | 0.00 | 0.00 | 0.68 | 0.14 | 16 | NK Cell |
| <i>ARPC3</i>    | 1.38 | 0.00 | 0.00 | 0.84 | 0.29 | 16 | NK Cell |
| <i>PRKCH</i>    | 1.21 | 0.00 | 0.00 | 0.37 | 0.05 | 16 | NK Cell |
| <i>RNF126</i>   | 1.08 | 0.00 | 0.00 | 0.32 | 0.04 | 16 | NK Cell |
| <i>EEF1D</i>    | 1.39 | 0.00 | 0.00 | 0.87 | 0.30 | 16 | NK Cell |
| <i>PYURF</i>    | 1.13 | 0.00 | 0.00 | 0.32 | 0.04 | 16 | NK Cell |
| <i>DPP7</i>     | 1.05 | 0.00 | 0.00 | 0.26 | 0.03 | 16 | NK Cell |
| <i>UCP2</i>     | 1.49 | 0.00 | 0.00 | 0.55 | 0.12 | 16 | NK Cell |
| <i>SH3BP1</i>   | 0.84 | 0.00 | 0.00 | 0.26 | 0.03 | 16 | NK Cell |
| <i>BTG1</i>     | 1.52 | 0.00 | 0.00 | 0.84 | 0.31 | 16 | NK Cell |
| <i>STK17B</i>   | 0.95 | 0.00 | 0.00 | 0.40 | 0.06 | 16 | NK Cell |
| <i>CD37</i>     | 1.06 | 0.00 | 0.00 | 0.45 | 0.07 | 16 | NK Cell |
| <i>MT-CO2</i>   | 1.08 | 0.00 | 0.00 | 1.00 | 0.79 | 16 | NK Cell |
| <i>JUN</i>      | 1.61 | 0.00 | 0.00 | 0.90 | 0.38 | 16 | NK Cell |
| <i>LDHB</i>     | 1.41 | 0.00 | 0.00 | 0.53 | 0.12 | 16 | NK Cell |
| <i>PFN1</i>     | 1.61 | 0.00 | 0.00 | 0.90 | 0.49 | 16 | NK Cell |
| <i>GBP2</i>     | 1.15 | 0.00 | 0.00 | 0.37 | 0.06 | 16 | NK Cell |
| <i>SEPT9</i>    | 1.24 | 0.00 | 0.00 | 0.50 | 0.10 | 16 | NK Cell |
| <i>HNRNPA1</i>  | 1.36 | 0.00 | 0.00 | 0.82 | 0.31 | 16 | NK Cell |
| <i>PSMF1</i>    | 1.00 | 0.00 | 0.00 | 0.34 | 0.05 | 16 | NK Cell |
| <i>S100A4</i>   | 1.31 | 0.00 | 0.00 | 0.50 | 0.10 | 16 | NK Cell |
| <i>EMP3</i>     | 1.36 | 0.00 | 0.00 | 0.74 | 0.24 | 16 | NK Cell |
| <i>PRMT2</i>    | 1.37 | 0.00 | 0.00 | 0.37 | 0.06 | 16 | NK Cell |
| <i>HOPX</i>     | 1.37 | 0.00 | 0.00 | 0.50 | 0.11 | 16 | NK Cell |

|                 |      |      |      |      |      |    |         |
|-----------------|------|------|------|------|------|----|---------|
| <i>RPL7A</i>    | 1.20 | 0.00 | 0.00 | 0.92 | 0.44 | 16 | NK Cell |
| <i>SLC9A3R1</i> | 0.91 | 0.00 | 0.00 | 0.29 | 0.04 | 16 | NK Cell |
| <i>C12orf75</i> | 0.87 | 0.00 | 0.00 | 0.29 | 0.04 | 16 | NK Cell |
| <i>RPL23A</i>   | 1.25 | 0.00 | 0.00 | 0.97 | 0.69 | 16 | NK Cell |
| <i>GTF3A</i>    | 1.11 | 0.00 | 0.00 | 0.45 | 0.09 | 16 | NK Cell |
| <i>SIGIRR</i>   | 1.16 | 0.00 | 0.00 | 0.29 | 0.04 | 16 | NK Cell |
| <i>RPS27A</i>   | 1.01 | 0.00 | 0.00 | 1.00 | 0.78 | 16 | NK Cell |
| <i>DENND2D</i>  | 1.11 | 0.00 | 0.00 | 0.29 | 0.04 | 16 | NK Cell |
| <i>RPLP2</i>    | 1.03 | 0.00 | 0.00 | 1.00 | 0.83 | 16 | NK Cell |
| <i>LSP1</i>     | 0.85 | 0.00 | 0.00 | 0.71 | 0.19 | 16 | NK Cell |
| <i>CDKN2D</i>   | 0.94 | 0.00 | 0.00 | 0.34 | 0.06 | 16 | NK Cell |
| <i>LYST</i>     | 1.14 | 0.00 | 0.00 | 0.29 | 0.04 | 16 | NK Cell |
| <i>NFKB2</i>    | 1.05 | 0.00 | 0.00 | 0.26 | 0.04 | 16 | NK Cell |
| <i>COMMD6</i>   | 1.09 | 0.00 | 0.00 | 0.61 | 0.17 | 16 | NK Cell |
| <i>SRGN</i>     | 0.96 | 0.00 | 0.00 | 0.90 | 0.32 | 16 | NK Cell |
| <i>ARHGEF1</i>  | 1.13 | 0.00 | 0.00 | 0.50 | 0.12 | 16 | NK Cell |
| <i>EIF1</i>     | 1.05 | 0.00 | 0.00 | 1.00 | 0.69 | 16 | NK Cell |
| <i>TTC19</i>    | 0.84 | 0.00 | 0.00 | 0.26 | 0.04 | 16 | NK Cell |
| <i>ARHGAP9</i>  | 1.01 | 0.00 | 0.00 | 0.26 | 0.04 | 16 | NK Cell |
| <i>TMC6</i>     | 0.81 | 0.00 | 0.00 | 0.26 | 0.04 | 16 | NK Cell |
| <i>PPP1R15A</i> | 1.17 | 0.00 | 0.00 | 0.40 | 0.08 | 16 | NK Cell |
| <i>RBCK1</i>    | 1.03 | 0.00 | 0.00 | 0.42 | 0.09 | 16 | NK Cell |
| <i>MIF</i>      | 1.12 | 0.00 | 0.00 | 0.68 | 0.23 | 16 | NK Cell |
| <i>PGAM1</i>    | 1.07 | 0.00 | 0.00 | 0.53 | 0.14 | 16 | NK Cell |
| <i>PPDPF</i>    | 1.10 | 0.00 | 0.00 | 0.68 | 0.23 | 16 | NK Cell |
| <i>TCF7</i>     | 0.91 | 0.00 | 0.00 | 0.34 | 0.06 | 16 | NK Cell |
| <i>SRP14</i>    | 0.87 | 0.00 | 0.00 | 0.84 | 0.34 | 16 | NK Cell |
| <i>PSME1</i>    | 1.12 | 0.00 | 0.00 | 0.79 | 0.34 | 16 | NK Cell |
| <i>MT-ND4</i>   | 0.78 | 0.00 | 0.00 | 1.00 | 0.77 | 16 | NK Cell |
| <i>INTS6</i>    | 0.95 | 0.00 | 0.00 | 0.26 | 0.04 | 16 | NK Cell |
| <i>PSMB10</i>   | 1.02 | 0.00 | 0.00 | 0.53 | 0.14 | 16 | NK Cell |
| <i>MDM4</i>     | 0.85 | 0.00 | 0.00 | 0.29 | 0.05 | 16 | NK Cell |
| <i>SH3BGRL3</i> | 1.00 | 0.00 | 0.00 | 0.82 | 0.36 | 16 | NK Cell |
| <i>CCNI</i>     | 0.99 | 0.00 | 0.00 | 0.63 | 0.20 | 16 | NK Cell |
| <i>WDR74</i>    | 0.83 | 0.00 | 0.00 | 0.29 | 0.05 | 16 | NK Cell |
| <i>FAM49B</i>   | 1.19 | 0.00 | 0.00 | 0.45 | 0.11 | 16 | NK Cell |
| <i>CYTIP</i>    | 0.97 | 0.00 | 0.00 | 0.42 | 0.09 | 16 | NK Cell |
| <i>CIB1</i>     | 1.00 | 0.00 | 0.00 | 0.50 | 0.13 | 16 | NK Cell |
| <i>GMFG</i>     | 0.94 | 0.00 | 0.00 | 0.55 | 0.15 | 16 | NK Cell |
| <i>CLIC3</i>    | 1.13 | 0.00 | 0.00 | 0.40 | 0.08 | 16 | NK Cell |
| <i>CLIC1</i>    | 1.10 | 0.00 | 0.00 | 0.84 | 0.39 | 16 | NK Cell |
| <i>NOC2L</i>    | 0.87 | 0.00 | 0.00 | 0.29 | 0.05 | 16 | NK Cell |
| <i>HCLS1</i>    | 0.88 | 0.00 | 0.00 | 0.37 | 0.07 | 16 | NK Cell |

|                |      |      |      |      |      |    |         |
|----------------|------|------|------|------|------|----|---------|
| <i>CIRBP</i>   | 1.01 | 0.00 | 0.00 | 0.71 | 0.26 | 16 | NK Cell |
| <i>LITAF</i>   | 1.06 | 0.00 | 0.00 | 0.47 | 0.13 | 16 | NK Cell |
| <i>ARL6IP5</i> | 1.07 | 0.00 | 0.00 | 0.50 | 0.14 | 16 | NK Cell |
| <i>SEPT6</i>   | 0.87 | 0.00 | 0.00 | 0.37 | 0.08 | 16 | NK Cell |
| <i>TERF2IP</i> | 1.00 | 0.00 | 0.00 | 0.37 | 0.08 | 16 | NK Cell |
| <i>PSMB8</i>   | 0.92 | 0.00 | 0.00 | 0.61 | 0.19 | 16 | NK Cell |
| <i>AES</i>     | 1.08 | 0.00 | 0.00 | 0.53 | 0.16 | 16 | NK Cell |
| <i>MT-ND3</i>  | 0.93 | 0.00 | 0.00 | 0.90 | 0.51 | 16 | NK Cell |
| <i>NBEAL1</i>  | 1.16 | 0.00 | 0.00 | 0.47 | 0.13 | 16 | NK Cell |
| <i>RPL7</i>    | 0.84 | 0.00 | 0.00 | 0.97 | 0.77 | 16 | NK Cell |
| <i>TMA7</i>    | 1.00 | 0.00 | 0.00 | 0.76 | 0.35 | 16 | NK Cell |
| <i>GLIPR2</i>  | 0.86 | 0.00 | 0.00 | 0.34 | 0.08 | 16 | NK Cell |
| <i>RDH14</i>   | 0.82 | 0.00 | 0.00 | 0.26 | 0.05 | 16 | NK Cell |
| <i>NDUFB2</i>  | 0.86 | 0.00 | 0.00 | 0.66 | 0.24 | 16 | NK Cell |
| <i>SRSF7</i>   | 1.19 | 0.00 | 0.00 | 0.53 | 0.18 | 16 | NK Cell |
| <i>STK4</i>    | 1.01 | 0.00 | 0.00 | 0.47 | 0.14 | 16 | NK Cell |
| <i>RPL8</i>    | 0.64 | 0.00 | 0.00 | 1.00 | 0.81 | 16 | NK Cell |
| <i>C9orf16</i> | 0.96 | 0.00 | 0.00 | 0.34 | 0.08 | 16 | NK Cell |
| <i>ALDOA</i>   | 0.83 | 0.00 | 0.00 | 0.63 | 0.23 | 16 | NK Cell |
| <i>TXNIP</i>   | 1.07 | 0.00 | 0.00 | 0.68 | 0.27 | 16 | NK Cell |
| <i>FDPS</i>    | 1.13 | 0.00 | 0.00 | 0.34 | 0.08 | 16 | NK Cell |
| <i>MT-CO1</i>  | 0.58 | 0.00 | 0.00 | 1.00 | 0.95 | 16 | NK Cell |
| <i>CYTH1</i>   | 0.91 | 0.00 | 0.00 | 0.32 | 0.07 | 16 | NK Cell |
| <i>PLEK</i>    | 0.92 | 0.00 | 0.00 | 0.32 | 0.07 | 16 | NK Cell |
| <i>CCDC107</i> | 0.83 | 0.00 | 0.00 | 0.40 | 0.11 | 16 | NK Cell |
| <i>RHOG</i>    | 0.95 | 0.00 | 0.00 | 0.42 | 0.12 | 16 | NK Cell |
| <i>PGK1</i>    | 1.00 | 0.00 | 0.00 | 0.45 | 0.14 | 16 | NK Cell |
| <i>FAM107B</i> | 0.75 | 0.00 | 0.00 | 0.32 | 0.07 | 16 | NK Cell |
| <i>FNBP1</i>   | 0.92 | 0.00 | 0.00 | 0.37 | 0.09 | 16 | NK Cell |
| <i>TNIP1</i>   | 0.80 | 0.00 | 0.00 | 0.26 | 0.05 | 16 | NK Cell |
| <i>DUSP1</i>   | 1.12 | 0.00 | 0.00 | 0.53 | 0.17 | 16 | NK Cell |
| <i>APRT</i>    | 0.81 | 0.00 | 0.00 | 0.55 | 0.19 | 16 | NK Cell |
| <i>SERF2</i>   | 0.79 | 0.00 | 0.00 | 0.95 | 0.60 | 16 | NK Cell |
| <i>PSMG2</i>   | 0.76 | 0.00 | 0.00 | 0.32 | 0.07 | 16 | NK Cell |
| <i>MFSD10</i>  | 0.79 | 0.00 | 0.00 | 0.29 | 0.06 | 16 | NK Cell |
| <i>CFL1</i>    | 0.72 | 0.00 | 0.00 | 0.92 | 0.61 | 16 | NK Cell |
| <i>GSTK1</i>   | 0.89 | 0.00 | 0.00 | 0.37 | 0.10 | 16 | NK Cell |
| <i>PSME2</i>   | 0.93 | 0.00 | 0.00 | 0.63 | 0.26 | 16 | NK Cell |
| <i>CAND1</i>   | 0.91 | 0.00 | 0.00 | 0.29 | 0.06 | 16 | NK Cell |
| <i>RPS13</i>   | 0.99 | 0.00 | 0.00 | 0.95 | 0.67 | 16 | NK Cell |
| <i>SSBP4</i>   | 0.67 | 0.00 | 0.00 | 0.29 | 0.06 | 16 | NK Cell |
| <i>MYL6</i>    | 0.61 | 0.00 | 0.00 | 0.97 | 0.73 | 16 | NK Cell |
| <i>SSR4</i>    | 0.82 | 0.00 | 0.00 | 0.66 | 0.27 | 16 | NK Cell |

|                 |      |      |      |      |      |    |         |
|-----------------|------|------|------|------|------|----|---------|
| <i>RPLP1</i>    | 0.72 | 0.00 | 0.00 | 1.00 | 0.91 | 16 | NK Cell |
| <i>RBMX</i>     | 0.85 | 0.00 | 0.00 | 0.45 | 0.14 | 16 | NK Cell |
| <i>GNG2</i>     | 0.81 | 0.00 | 0.00 | 0.42 | 0.12 | 16 | NK Cell |
| <i>HMGN3</i>    | 0.92 | 0.00 | 0.00 | 0.32 | 0.08 | 16 | NK Cell |
| <i>CUTA</i>     | 0.85 | 0.00 | 0.00 | 0.55 | 0.21 | 16 | NK Cell |
| <i>RPL24</i>    | 0.87 | 0.00 | 0.00 | 0.87 | 0.50 | 16 | NK Cell |
| <i>UBE2L6</i>   | 0.87 | 0.00 | 0.00 | 0.26 | 0.06 | 16 | NK Cell |
| <i>SORL1</i>    | 0.91 | 0.00 | 0.00 | 0.29 | 0.07 | 16 | NK Cell |
| <i>TWF2</i>     | 0.67 | 0.00 | 0.00 | 0.37 | 0.10 | 16 | NK Cell |
| <i>TMEM230</i>  | 0.87 | 0.00 | 0.00 | 0.32 | 0.08 | 16 | NK Cell |
| <i>CKLF</i>     | 0.75 | 0.00 | 0.00 | 0.26 | 0.06 | 16 | NK Cell |
| <i>TRMT112</i>  | 0.71 | 0.00 | 0.00 | 0.53 | 0.18 | 16 | NK Cell |
| <i>RPL18A</i>   | 0.80 | 0.00 | 0.00 | 0.97 | 0.84 | 16 | NK Cell |
| <i>CDC42SE2</i> | 0.84 | 0.00 | 0.00 | 0.42 | 0.13 | 16 | NK Cell |
| <i>CD55</i>     | 0.78 | 0.00 | 0.00 | 0.29 | 0.07 | 16 | NK Cell |
| <i>EPC1</i>     | 0.87 | 0.00 | 0.00 | 0.37 | 0.11 | 16 | NK Cell |
| <i>MT-CO3</i>   | 0.51 | 0.00 | 0.00 | 1.00 | 0.89 | 16 | NK Cell |
| <i>RCSD1</i>    | 0.75 | 0.00 | 0.00 | 0.34 | 0.09 | 16 | NK Cell |
| <i>POLR2L</i>   | 0.90 | 0.00 | 0.00 | 0.53 | 0.20 | 16 | NK Cell |
| <i>OST4</i>     | 0.84 | 0.00 | 0.00 | 0.66 | 0.29 | 16 | NK Cell |
| <i>HSPE1</i>    | 0.85 | 0.00 | 0.00 | 0.66 | 0.30 | 16 | NK Cell |
| <i>SLC38A2</i>  | 0.96 | 0.00 | 0.00 | 0.50 | 0.19 | 16 | NK Cell |
| <i>UBC</i>      | 1.05 | 0.00 | 0.00 | 0.82 | 0.51 | 16 | NK Cell |
| <i>EIF3L</i>    | 0.77 | 0.00 | 0.00 | 0.47 | 0.17 | 16 | NK Cell |
| <i>LCP1</i>     | 0.47 | 0.00 | 0.00 | 0.61 | 0.21 | 16 | NK Cell |
| <i>PSMB3</i>    | 0.77 | 0.00 | 0.00 | 0.63 | 0.27 | 16 | NK Cell |
| <i>TANK</i>     | 0.77 | 0.00 | 0.00 | 0.26 | 0.06 | 16 | NK Cell |
| <i>ARHGAP30</i> | 0.52 | 0.00 | 0.00 | 0.37 | 0.10 | 16 | NK Cell |
| <i>TAPBP</i>    | 0.84 | 0.00 | 0.00 | 0.45 | 0.16 | 16 | NK Cell |
| <i>PFDN5</i>    | 0.60 | 0.00 | 0.00 | 0.90 | 0.53 | 16 | NK Cell |
| <i>ENO1</i>     | 0.92 | 0.00 | 0.00 | 0.50 | 0.19 | 16 | NK Cell |
| <i>NOSIP</i>    | 0.71 | 0.00 | 0.00 | 0.34 | 0.10 | 16 | NK Cell |
| <i>EIF3G</i>    | 0.90 | 0.00 | 0.00 | 0.53 | 0.21 | 16 | NK Cell |
| <i>PTPN6</i>    | 0.73 | 0.00 | 0.00 | 0.32 | 0.08 | 16 | NK Cell |
| <i>CD44</i>     | 0.61 | 0.00 | 0.01 | 0.55 | 0.21 | 16 | NK Cell |
| <i>PIM1</i>     | 0.68 | 0.00 | 0.01 | 0.32 | 0.09 | 16 | NK Cell |
| <i>TIMP1</i>    | 0.38 | 0.00 | 0.01 | 0.32 | 0.09 | 16 | NK Cell |
| <i>EFHD2</i>    | 0.70 | 0.00 | 0.01 | 0.32 | 0.09 | 16 | NK Cell |
| <i>EIF4A2</i>   | 0.84 | 0.00 | 0.01 | 0.68 | 0.35 | 16 | NK Cell |
| <i>FERMT3</i>   | 0.53 | 0.00 | 0.01 | 0.26 | 0.06 | 16 | NK Cell |
| <i>PIP4K2A</i>  | 0.71 | 0.00 | 0.01 | 0.26 | 0.07 | 16 | NK Cell |
| <i>NACA</i>     | 0.64 | 0.00 | 0.01 | 0.87 | 0.61 | 16 | NK Cell |
| <i>EXOSC8</i>   | 0.86 | 0.00 | 0.01 | 0.29 | 0.08 | 16 | NK Cell |

|                |      |      |      |      |      |    |         |
|----------------|------|------|------|------|------|----|---------|
| <i>ARPC1B</i>  | 0.63 | 0.00 | 0.01 | 0.71 | 0.37 | 16 | NK Cell |
| <i>RPS4X</i>   | 0.61 | 0.00 | 0.02 | 1.00 | 0.88 | 16 | NK Cell |
| <i>FBL</i>     | 0.93 | 0.00 | 0.02 | 0.32 | 0.10 | 16 | NK Cell |
| <i>BAZ1A</i>   | 0.82 | 0.00 | 0.02 | 0.40 | 0.13 | 16 | NK Cell |
| <i>XRCC6</i>   | 0.61 | 0.00 | 0.02 | 0.26 | 0.07 | 16 | NK Cell |
| <i>LDHA</i>    | 0.84 | 0.00 | 0.02 | 0.63 | 0.32 | 16 | NK Cell |
| <i>RBM8A</i>   | 0.75 | 0.00 | 0.02 | 0.63 | 0.30 | 16 | NK Cell |
| <i>ADAR</i>    | 0.74 | 0.00 | 0.02 | 0.26 | 0.07 | 16 | NK Cell |
| <i>HNRNPA0</i> | 0.72 | 0.00 | 0.02 | 0.55 | 0.25 | 16 | NK Cell |
| <i>COPE</i>    | 0.70 | 0.00 | 0.04 | 0.55 | 0.25 | 16 | NK Cell |
| <i>ABHD17A</i> | 0.64 | 0.00 | 0.04 | 0.26 | 0.07 | 16 | NK Cell |
| <i>KARS</i>    | 0.84 | 0.00 | 0.04 | 0.29 | 0.09 | 16 | NK Cell |
| <i>BTF3</i>    | 0.72 | 0.00 | 0.04 | 0.79 | 0.55 | 16 | NK Cell |
| <i>RNF166</i>  | 0.63 | 0.00 | 0.05 | 0.26 | 0.07 | 16 | NK Cell |
| <i>AIP</i>     | 0.70 | 0.00 | 0.05 | 0.26 | 0.07 | 16 | NK Cell |

---

Table S9: Genes differentially expressed in Young and Old Matrix Fibroblasts

| Gene            | Log2<br>FoldChange | Unadjusted<br>p-value | Adjusted<br>p-value | High in |
|-----------------|--------------------|-----------------------|---------------------|---------|
| <i>IGFBP7</i>   | -2.32944           | 1.76E-16              | 6.37E-14            | Early   |
| <i>HES1</i>     | -2.0363            | 5.05E-14              | 9.16E-12            | Early   |
| <i>RGS3</i>     | -1.98867           | 5.12E-12              | 5.31E-10            | Early   |
| <i>TAGLN</i>    | -1.85646           | 6.78E-12              | 6.15E-10            | Early   |
| <i>C11orf96</i> | -1.75965           | 3.53E-08              | 9.43E-07            | Early   |
| <i>EGFL6</i>    | -1.66064           | 2.19E-08              | 6.37E-07            | Early   |
| <i>TGM2</i>     | -1.61017           | 1.47E-13              | 2.13E-11            | Early   |
| <i>TPPP3</i>    | -1.53759           | 8.42E-06              | 0.00013             | Early   |
| <i>C1R</i>      | -1.41221           | 2.44E-11              | 1.77E-09            | Early   |
| <i>GPX3</i>     | -1.39671           | 1.69E-10              | 1.12E-08            | Early   |
| <i>PDGFRB</i>   | -1.38072           | 8.95E-10              | 4.06E-08            | Early   |
| <i>BGN</i>      | -1.32151           | 3.73E-10              | 2.08E-08            | Early   |
| <i>ELN</i>      | -1.27578           | 3.63E-15              | 8.78E-13            | Early   |
| <i>LITAF</i>    | -1.24824           | 1.86E-12              | 2.25E-10            | Early   |
| <i>TIMP1</i>    | -1.23053           | 2.72E-10              | 1.65E-08            | Early   |
| <i>LMNA</i>     | -1.22694           | 1.89E-09              | 7.99E-08            | Early   |
| <i>RARRES1</i>  | -1.21227           | 6.42E-06              | 0.000104            | Early   |
| <i>CRIP2</i>    | -1.15468           | 1.90E-07              | 3.82E-06            | Early   |
| <i>CNN3</i>     | -1.14133           | 2.88E-07              | 5.65E-06            | Early   |
| <i>PMP22</i>    | -1.13909           | 8.31E-12              | 6.70E-10            | Early   |
| <i>ZFP36</i>    | -1.12008           | 0.003101              | 0.018012            | Early   |
| <i>IGFBP4</i>   | -1.11364           | 0.000134              | 0.001453            | Early   |
| <i>CD59</i>     | -1.1021            | 1.98E-09              | 7.99E-08            | Early   |
| <i>TPM2</i>     | -1.07868           | 4.54E-10              | 2.20E-08            | Early   |
| <i>PLAC9</i>    | -1.06543           | 6.56E-07              | 1.19E-05            | Early   |
| <i>TPM4</i>     | -1.04635           | 1.19E-08              | 3.77E-07            | Early   |
| <i>ZYX</i>      | -1.01911           | 8.15E-09              | 2.96E-07            | Early   |
| <i>CCDC80</i>   | -1.01612           | 0.000365              | 0.003195            | Early   |
| <i>TPM1</i>     | -0.98081           | 1.24E-07              | 2.73E-06            | Early   |
| <i>PDLIM3</i>   | -0.97266           | 0.000146              | 0.001518            | Early   |
| <i>TUBA1A</i>   | -0.94876           | 1.43E-08              | 4.31E-07            | Early   |
| <i>COL4A1</i>   | -0.94321           | 3.05E-05              | 0.000381            | Early   |
| <i>CTGF</i>     | -0.94149           | 0.020365              | 0.075432            | Early   |
| <i>YBX3</i>     | -0.93912           | 9.98E-05              | 0.00115             | Early   |
| <i>ENG</i>      | -0.89199           | 0.000332              | 0.002942            | Early   |
| <i>ZFP36L2</i>  | -0.89135           | 1.55E-07              | 3.21E-06            | Early   |
| <i>MYL9</i>     | -0.88525           | 3.64E-08              | 9.43E-07            | Early   |
| <i>TUBA1B</i>   | -0.85148           | 5.25E-08              | 1.27E-06            | Early   |
| <i>KDELR2</i>   | -0.84422           | 1.03E-05              | 0.000152            | Early   |

|                 |          |          |          |       |
|-----------------|----------|----------|----------|-------|
| <i>TXNIP</i>    | -0.84004 | 1.62E-05 | 0.000222 | Early |
| <i>RHOC</i>     | -0.81135 | 3.11E-05 | 0.000383 | Early |
| <i>ANXA2</i>    | -0.79852 | 6.59E-06 | 0.000104 | Early |
| <i>HNRNPM</i>   | -0.79017 | 2.39E-05 | 0.00031  | Early |
| <i>SERPING1</i> | -0.78543 | 6.55E-07 | 1.19E-05 | Early |
| <i>ZFP36L1</i>  | -0.78119 | 1.51E-07 | 3.21E-06 | Early |
| <i>TSC22D1</i>  | -0.77537 | 1.30E-05 | 0.000185 | Early |
| <i>APOE</i>     | -0.75428 | 2.49E-05 | 0.000317 | Early |
| <i>FMO2</i>     | -0.73943 | 0.003523 | 0.019377 | Early |
| <i>IFITM2</i>   | -0.73789 | 1.35E-05 | 0.000188 | Early |
| <i>NDRG2</i>    | -0.71935 | 0.000546 | 0.004608 | Early |
| <i>ITGB1</i>    | -0.71754 | 5.34E-05 | 0.000636 | Early |
| <i>CEBPB</i>    | -0.69796 | 0.001135 | 0.008494 | Early |
| <i>COL4A2</i>   | -0.6912  | 0.001327 | 0.009404 | Early |
| <i>GPX4</i>     | -0.68504 | 1.01E-05 | 0.000152 | Early |
| <i>ARF1</i>     | -0.67965 | 1.09E-05 | 0.000158 | Early |
| <i>ARID5B</i>   | -0.67637 | 0.001334 | 0.009404 | Early |
| <i>CD63</i>     | -0.67523 | 8.88E-09 | 3.07E-07 | Early |
| <i>CALM2</i>    | -0.67503 | 4.53E-10 | 2.20E-08 | Early |
| <i>TAGLN2</i>   | -0.66315 | 1.16E-07 | 2.64E-06 | Early |
| <i>ARF4</i>     | -0.65749 | 0.000211 | 0.002015 | Early |
| <i>INMT</i>     | -0.65208 | 0.00084  | 0.006435 | Early |
| <i>TUBB4B</i>   | -0.6494  | 0.003954 | 0.021109 | Early |
| <i>EDNRA</i>    | -0.647   | 0.002747 | 0.016744 | Early |
| <i>ACTA2</i>    | -0.63586 | 0.003701 | 0.0202   | Early |
| <i>TNC</i>      | -0.63571 | 0.014358 | 0.057591 | Early |
| <i>DPYSL2</i>   | -0.63193 | 0.005437 | 0.026672 | Early |
| <i>SPARC</i>    | -0.62971 | 4.46E-08 | 1.12E-06 | Early |
| <i>CALU</i>     | -0.62885 | 0.001723 | 0.011249 | Early |
| <i>PLS3</i>     | -0.62687 | 0.001882 | 0.011983 | Early |
| <i>GABARAP</i>  | -0.62009 | 0.001348 | 0.009413 | Early |
| <i>MRFAP1</i>   | -0.61928 | 1.65E-05 | 0.000222 | Early |
| <i>VIM</i>      | -0.61924 | 9.89E-09 | 3.26E-07 | Early |
| <i>OAZ2</i>     | -0.61866 | 0.001939 | 0.012242 | Early |
| <i>SRSF11</i>   | -0.61306 | 0.000325 | 0.002915 | Early |
| <i>LGALS3</i>   | -0.60514 | 0.003318 | 0.01882  | Early |
| <i>RNH1</i>     | -0.60094 | 0.001303 | 0.009404 | Early |
| <i>FHL1</i>     | -0.59926 | 3.44E-06 | 5.94E-05 | Early |
| <i>TNFRSF1A</i> | -0.5988  | 0.003059 | 0.017929 | Early |
| <i>DYNLL1</i>   | -0.59679 | 0.000124 | 0.001366 | Early |
| <i>COL1A1</i>   | -0.59292 | 5.09E-07 | 9.72E-06 | Early |
| <i>DNAJB6</i>   | -0.58755 | 0.003766 | 0.020403 | Early |
| <i>MYH10</i>    | -0.58524 | 0.003317 | 0.01882  | Early |

|                  |          |          |          |       |
|------------------|----------|----------|----------|-------|
| <i>BZW1</i>      | -0.58436 | 0.003225 | 0.018581 | Early |
| <i>AOC3</i>      | -0.5798  | 0.000709 | 0.005852 | Early |
| <i>MORF4L2</i>   | -0.57608 | 0.001735 | 0.011249 | Early |
| <i>GABARAPL2</i> | -0.57497 | 0.000178 | 0.001751 | Early |
| <i>LGALS1</i>    | -0.57334 | 1.12E-07 | 2.63E-06 | Early |
| <i>SPCS2</i>     | -0.57222 | 0.00049  | 0.004184 | Early |
| <i>MDFI</i>      | -0.57016 | 0.008299 | 0.037604 | Early |
| <i>PNRC1</i>     | -0.56973 | 0.000111 | 0.001236 | Early |
| <i>Hs.SEPT2</i>  | -0.56815 | 0.001309 | 0.009404 | Early |
| <i>GOS2</i>      | -0.56519 | 0.008273 | 0.037604 | Early |
| <i>RPS27L</i>    | -0.55841 | 0.000842 | 0.006435 | Early |
| <i>TIMP3</i>     | -0.55406 | 0.001682 | 0.011104 | Early |
| <i>YWHAQ</i>     | -0.55379 | 0.000138 | 0.001468 | Early |
| <i>NDUFS5</i>    | -0.5475  | 0.000192 | 0.001862 | Early |
| <i>ANXA5</i>     | -0.54611 | 0.000104 | 0.001177 | Early |
| <i>CALD1</i>     | -0.54219 | 5.13E-05 | 0.000621 | Early |
| <i>NAP1L1</i>    | -0.53864 | 6.62E-06 | 0.000104 | Early |
| <i>Hs.SEPT11</i> | -0.53603 | 0.005985 | 0.028776 | Early |
| <i>TACC1</i>     | -0.53508 | 0.003372 | 0.018976 | Early |
| <i>COL5A2</i>    | -0.53468 | 0.01006  | 0.043217 | Early |
| <i>MTCH1</i>     | -0.53432 | 0.001653 | 0.011009 | Early |
| <i>CARHSP1</i>   | -0.53339 | 0.004333 | 0.022386 | Early |
| <i>SOD3</i>      | -0.52552 | 0.002627 | 0.016165 | Early |
| <i>SF3B2</i>     | -0.52503 | 0.006204 | 0.029632 | Early |
| <i>EIF1B</i>     | -0.52112 | 0.006617 | 0.031398 | Early |
| <i>SEC11A</i>    | -0.51765 | 0.002925 | 0.017553 | Early |
| <i>SEC61B</i>    | -0.51712 | 0.000997 | 0.007542 | Early |
| <i>TBX2</i>      | -0.51581 | 0.015875 | 0.061702 | Early |
| <i>HSPB1</i>     | -0.51386 | 0.000145 | 0.001518 | Early |
| <i>KIF5B</i>     | -0.50934 | 0.012122 | 0.050004 | Early |
| <i>CSDE1</i>     | -0.50819 | 0.002588 | 0.01606  | Early |
| <i>TMED9</i>     | -0.50057 | 0.004239 | 0.022143 | Early |
| <i>NDUFS6</i>    | -0.49675 | 0.009337 | 0.041083 | Early |
| <i>SLC25A3</i>   | -0.49396 | 0.000278 | 0.002525 | Early |
| <i>S100A13</i>   | -0.49001 | 0.018448 | 0.070863 | Early |
| <i>KANK2</i>     | -0.48986 | 0.011696 | 0.04852  | Early |
| <i>SERPINH1</i>  | -0.48578 | 0.004191 | 0.022123 | Early |
| <i>FBLN5</i>     | -0.48495 | 0.009904 | 0.042799 | Early |
| <i>MFGE8</i>     | -0.48076 | 0.024787 | 0.088412 | Early |
| <i>RBM3</i>      | -0.4738  | 0.01043  | 0.044281 | Early |
| <i>ARPC5</i>     | -0.47105 | 0.002768 | 0.016744 | Early |
| <i>RPN2</i>      | -0.47002 | 0.020478 | 0.075467 | Early |
| <i>EIF4H</i>     | -0.46734 | 0.008878 | 0.039543 | Early |

|                 |          |          |          |       |
|-----------------|----------|----------|----------|-------|
| <i>PRDX6</i>    | -0.4666  | 0.001187 | 0.008792 | Early |
| <i>MYL6</i>     | -0.46088 | 3.26E-08 | 9.09E-07 | Early |
| <i>GDI2</i>     | -0.45425 | 0.015836 | 0.061702 | Early |
| <i>MXRA8</i>    | -0.45303 | 0.014476 | 0.057745 | Early |
| <i>GNAS</i>     | -0.44941 | 0.007093 | 0.033221 | Early |
| <i>PSMB5</i>    | -0.44353 | 0.0137   | 0.055708 | Early |
| <i>CAV1</i>     | -0.44144 | 0.001638 | 0.011009 | Early |
| <i>FTH1</i>     | -0.43957 | 4.06E-09 | 1.55E-07 | Early |
| <i>KRT10</i>    | -0.43938 | 0.024725 | 0.088412 | Early |
| <i>HNRNPDL</i>  | -0.43903 | 0.0021   | 0.01314  | Early |
| <i>GPX1</i>     | -0.43719 | 0.012529 | 0.05139  | Early |
| <i>CSRP1</i>    | -0.4347  | 0.00076  | 0.006017 | Early |
| <i>TMBIM6</i>   | -0.43397 | 0.003062 | 0.017929 | Early |
| <i>HNRNPA3</i>  | -0.4339  | 0.015177 | 0.059883 | Early |
| <i>CSNK2B</i>   | -0.43013 | 0.018858 | 0.072057 | Early |
| <i>ESD</i>      | -0.42708 | 0.009859 | 0.042799 | Early |
| <i>SCP2</i>     | -0.42113 | 0.028794 | 0.099544 | Early |
| <i>MORF4L1</i>  | -0.41907 | 0.000482 | 0.004165 | Early |
| <i>DKK3</i>     | -0.41707 | 0.019368 | 0.072855 | Early |
| <i>CFL1</i>     | -0.41632 | 0.000596 | 0.00497  | Early |
| <i>SH3BGRL</i>  | -0.41207 | 0.007413 | 0.034497 | Early |
| <i>NDUFA4</i>   | -0.41154 | 0.000166 | 0.001677 | Early |
| <i>UBC</i>      | -0.41108 | 0.000732 | 0.005969 | Early |
| <i>S100A11</i>  | -0.41022 | 0.021602 | 0.079207 | Early |
| <i>TMED2</i>    | -0.40968 | 0.013735 | 0.055708 | Early |
| <i>MGP</i>      | -0.40669 | 0.010881 | 0.045661 | Early |
| <i>CST3</i>     | -0.40508 | 0.019363 | 0.072855 | Early |
| <i>COL6A1</i>   | -0.39744 | 0.001467 | 0.010051 | Early |
| <i>P4HB</i>     | -0.39601 | 0.015893 | 0.061702 | Early |
| <i>CAPZB</i>    | -0.39509 | 0.00509  | 0.025403 | Early |
| <i>ALDOA</i>    | -0.39333 | 0.009519 | 0.041632 | Early |
| <i>ACTG1</i>    | -0.39223 | 2.19E-05 | 0.000289 | Early |
| <i>C12orf57</i> | -0.38414 | 0.014872 | 0.059002 | Early |
| <i>LBH</i>      | -0.38187 | 0.008339 | 0.037604 | Early |
| <i>PTMA</i>     | -0.37831 | 4.06E-06 | 6.85E-05 | Early |
| <i>RAN</i>      | -0.37737 | 0.022276 | 0.081267 | Early |
| <i>SUB1</i>     | -0.36821 | 0.005647 | 0.027331 | Early |
| <i>SRP9</i>     | -0.36753 | 0.014284 | 0.057591 | Early |
| <i>COL1A2</i>   | -0.36717 | 0.000273 | 0.002511 | Early |
| <i>HMGB1</i>    | -0.3665  | 0.000829 | 0.006435 | Early |
| <i>TMEM59</i>   | -0.35658 | 0.004205 | 0.022123 | Early |
| <i>EID1</i>     | -0.35165 | 0.001229 | 0.009016 | Early |
| <i>COL3A1</i>   | -0.34911 | 0.010161 | 0.043394 | Early |

|                 |          |          |          |       |
|-----------------|----------|----------|----------|-------|
| <i>CCNI</i>     | -0.34676 | 0.000762 | 0.006017 | Early |
| <i>UBL5</i>     | -0.34671 | 0.009296 | 0.041083 | Early |
| <i>HNRNPA0</i>  | -0.34656 | 0.010825 | 0.045661 | Early |
| <i>GSTP1</i>    | -0.33657 | 0.005093 | 0.025403 | Early |
| <i>MFAP4</i>    | -0.32692 | 0.005135 | 0.025403 | Early |
| <i>UQCRQ</i>    | -0.31804 | 0.026824 | 0.094996 | Early |
| <i>BSG</i>      | -0.31785 | 0.027575 | 0.096309 | Early |
| <i>LAPTM4A</i>  | -0.31742 | 0.001401 | 0.009684 | Early |
| <i>HSP90AB1</i> | -0.30996 | 0.001622 | 0.011007 | Early |
| <i>SOD1</i>     | -0.3008  | 0.019587 | 0.0733   | Early |
| <i>DSTN</i>     | -0.29783 | 0.006904 | 0.032547 | Early |
| <i>NUCKS1</i>   | -0.28211 | 0.024843 | 0.088412 | Early |
| <i>CHCHD2</i>   | -0.27445 | 0.007708 | 0.035641 | Early |
| <i>EIF4A2</i>   | -0.26852 | 0.019286 | 0.072855 | Early |
| <i>HNRNPA1</i>  | -0.26191 | 0.000231 | 0.00218  | Early |
| <i>BTF3</i>     | -0.24315 | 0.005569 | 0.027137 | Early |
| <i>EEF2</i>     | -0.23726 | 0.005055 | 0.025403 | Early |
| <i>H3F3B</i>    | -0.17482 | 0.028502 | 0.099008 | Early |
| <i>RPL8</i>     | -0.1464  | 0.003827 | 0.020583 | Early |
| <i>RPL23A</i>   | 0.127451 | 0.016545 | 0.06389  | Late  |
| <i>MT-CO3</i>   | 0.163465 | 0.02017  | 0.075096 | Late  |
| <i>RPL29</i>    | 0.169345 | 0.002965 | 0.017643 | Late  |
| <i>RPLP2</i>    | 0.177702 | 0.000756 | 0.006017 | Late  |
| <i>RPL18A</i>   | 0.216409 | 9.67E-07 | 1.71E-05 | Late  |
| <i>MT-CO1</i>   | 0.263336 | 8.68E-05 | 0.001017 | Late  |
| <i>EEF1B2</i>   | 0.27718  | 0.027593 | 0.096309 | Late  |
| <i>PFN1</i>     | 0.291909 | 0.027396 | 0.096309 | Late  |
| <i>LDHB</i>     | 0.349191 | 0.008439 | 0.037819 | Late  |
| <i>LMO4</i>     | 0.353492 | 0.011561 | 0.048239 | Late  |
| <i>OLFML3</i>   | 0.396225 | 0.024824 | 0.088412 | Late  |
| <i>BTG1</i>     | 0.412775 | 0.000172 | 0.001707 | Late  |
| <i>PSME2</i>    | 0.414944 | 0.022841 | 0.082914 | Late  |
| <i>HSPE1</i>    | 0.470328 | 0.004613 | 0.023582 | Late  |
| <i>SH3BGRL3</i> | 0.478596 | 0.003433 | 0.019171 | Late  |
| <i>LY6E</i>     | 0.480952 | 0.004348 | 0.022386 | Late  |
| <i>TECR</i>     | 0.500961 | 0.007873 | 0.036174 | Late  |
| <i>EPHX1</i>    | 0.523167 | 0.005144 | 0.025403 | Late  |
| <i>CCBE1</i>    | 0.594546 | 0.001787 | 0.011484 | Late  |
| <i>CYBA</i>     | 0.624535 | 0.000166 | 0.001677 | Late  |
| <i>SMPDL3A</i>  | 0.655026 | 0.003516 | 0.019377 | Late  |
| <i>B2M</i>      | 0.842561 | 9.93E-19 | 7.21E-16 | Late  |
| <i>S100A4</i>   | 0.937335 | 0.000272 | 0.002511 | Late  |

---

Table S10: Pathways activated in early maturing fibroblasts

| Name                                                                                                                            | Source   | pValue    | -LOG<br>(pvalue) | Genes<br>in<br>Input | Genes in<br>Annotation | Gene Names                                                                                                                                                                               |
|---------------------------------------------------------------------------------------------------------------------------------|----------|-----------|------------------|----------------------|------------------------|------------------------------------------------------------------------------------------------------------------------------------------------------------------------------------------|
| Smooth Muscle<br>Contraction                                                                                                    | REACTOME | 3.182E-10 | 31.54934711      | 9                    | 36                     | TPM1, TPM2, TPM4,<br>MYL6, CALD1, CALM2,<br>ANXA2, ACTA2, MYL9<br>COL3A1, COL4A1,                                                                                                        |
| Scavenging by Class<br>A Receptors                                                                                              | REACTOME | 3.387E-09 | 28.13734487      | 7                    | 21                     | COL4A2, APOE, FTH1,<br>COL1A1, COL1A2<br>COL3A1, COL4A1,<br>COL4A2, COL5A2,<br>COL6A1, FBLN5, SPARC,<br>TNC, SERPINH1, ITGB1,<br>BGN, MFAP4, TIMP1,<br>P4HB, BSG, ELN, COL1A1,<br>COL1A2 |
| Extracellular matrix<br>organization                                                                                            | REACTOME | 2.048E-08 | 25.54120904      | 18                   | 298                    | SPARC, CALM2, CALU,<br>CFL1, ANXA5, TIMP1,<br>TIMP3, SERPING1, CD63,<br>TAGLN2, ALDOA, SOD1                                                                                              |
| Platelet<br>degranulation                                                                                                       | REACTOME | 6.536E-08 | 23.86701678      | 12                   | 132                    | SPARC, CALM2, CALU,<br>CFL1, ANXA5, TIMP1,<br>TIMP3, SERPING1, CD63,<br>TAGLN2, ALDOA, SOD1                                                                                              |
| Response to<br>elevated platelet<br>cytosolic Ca <sup>2+</sup><br>Binding and Uptake<br>of Ligands by<br>Scavenger<br>Receptors | REACTOME | 9.884E-08 | 23.27032975      | 12                   | 137                    | COL3A1, COL4A1,<br>COL4A2, SPARC, APOE,<br>FTH1, COL1A1, COL1A2<br>COL3A1, COL4A1,<br>COL4A2, COL5A2,<br>COL6A1, SERPINH1,<br>P4HB, COL1A1, COL1A2                                       |
| Collagen<br>biosynthesis and<br>modifying enzymes<br>Detoxification of<br>Reactive Oxygen<br>Species                            | REACTOME | 1.548E-07 | 22.62309119      | 9                    | 70                     | GPX1, GPX3, PRDX6,<br>GSTP1, P4HB, SOD1,<br>SOD3                                                                                                                                         |
|                                                                                                                                 | REACTOME | 3.093E-07 | 21.62448983      | 7                    | 38                     | COL3A1, COL4A1,<br>COL4A2, COL5A2,<br>COL6A1, COL1A1,<br>COL1A2                                                                                                                          |
| Collagen chain<br>trimerization                                                                                                 | REACTOME | 1.407E-06 | 19.43894624      | 7                    | 47                     | DPYSL2, MYH10, MYL6,<br>CFL1, ITGB1, RHOC,<br>MYL9, HSP90AB1                                                                                                                             |
| Semaphorin<br>interactions                                                                                                      | REACTOME | 1.553E-06 | 19.29651074      | 8                    | 68                     | COL3A1, COL4A1,<br>COL4A2, COL5A2,<br>COL6A1, SERPINH1,<br>P4HB, COL1A1, COL1A2                                                                                                          |
| Collagen formation                                                                                                              | REACTOME | 1.807E-06 | 19.07797206      | 9                    | 93                     |                                                                                                                                                                                          |

|                                                              |          |            |             |    |     |                                                                                                                                                                      |
|--------------------------------------------------------------|----------|------------|-------------|----|-----|----------------------------------------------------------------------------------------------------------------------------------------------------------------------|
| Vesicle-mediated transport                                   | REACTOME | 4.405E-06  | 17.79242655 | 23 | 660 | COL3A1, COL4A1, COL4A2, KDELR2, SPARC, CALM2, GABARAP, GABARAPL2, APOE, GDI2, ARPC5, ARF1, ARF4, UBC, FTH1, CD59, TMED9, DYNLL1, TMED2, KIF5B, YWHAQ, COL1A1, COL1A2 |
|                                                              |          |            |             |    |     | COL3A1, COL4A1, COL4A2, COL5A2, COL6A1, COL1A1, COL1A2                                                                                                               |
| Assembly of collagen fibrils and other multimeric structures | REACTOME | 7.573E-06  | 17.01070364 | 7  | 60  | SPARC, CALM2, CALU, CFL1, ANXA5, TIMP1, TIMP3, SERPING1, CD63, TAGLN2, ALDOA, SOD1, COL3A1, COL4A1, COL4A2, APOE, COL1A1, COL1A2                                     |
| Neutrophil degranulation                                     | REACTOME | 0.00002818 | 15.11496886 | 18 | 492 |                                                                                                                                                                      |

---

Table S11: Cellular Classification Accuracy

|             | <b>Newborn<br/>Human Only</b> | <b>Human Mouse<br/>Combined</b> | <b>Overlap</b> | <b>Accuracy</b> |
|-------------|-------------------------------|---------------------------------|----------------|-----------------|
| Mesenchymal | 3553                          | 1476                            | 1431           | 96.95           |
| Endothelial | 1119                          | 641                             | 625            | 97.50           |
| Immune      | 618                           | 186                             | 182            | 97.85           |
| Epithelial  | 209                           | 24                              | 18             | 75.00           |
| TOTAL       | 5499                          | 2327                            | 2256           | 96.95           |

Figure S1: Schematic of the steps involved in the process of single-cell sequencing of the human lungs, further integrating the data from human cells to the mouse single cell sequencing data, and finally estimating ages of human cells using the mouse cells.

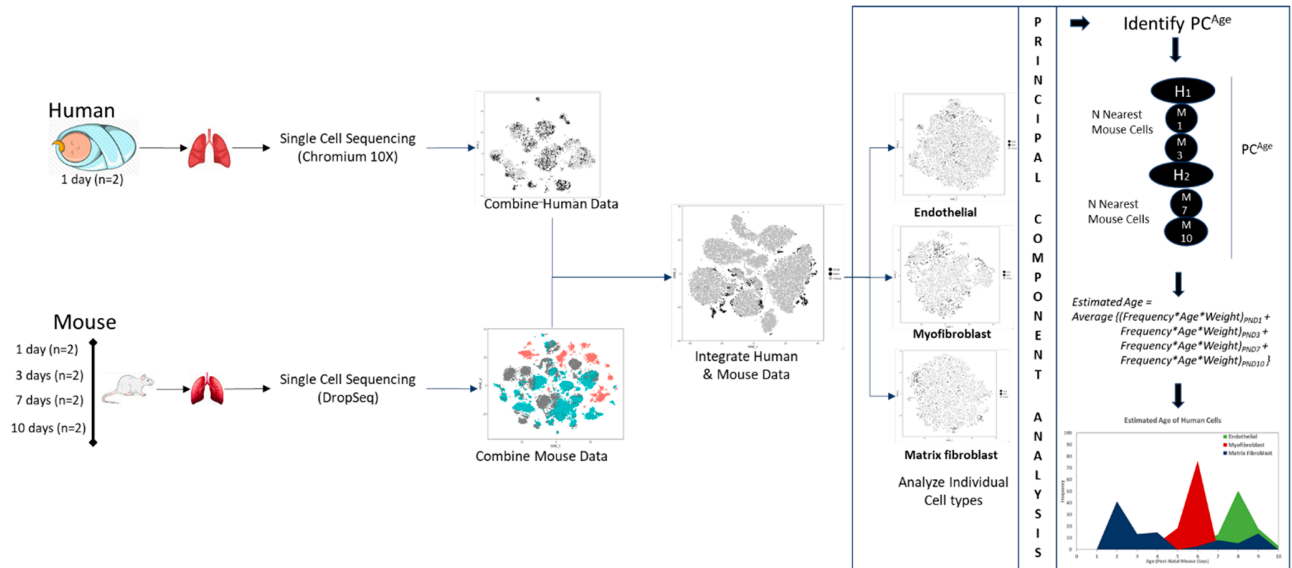

Figure S2: Quality Control metrics. We visualized gene and molecule counts, and mitochondrial genes present to filter cells for quality, and potentially exclude doublets.

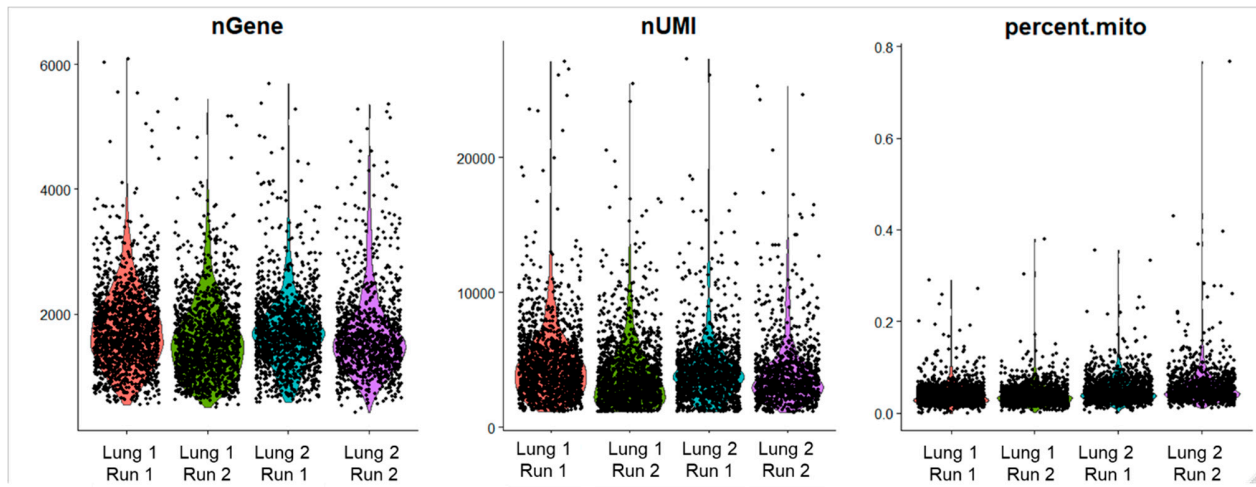

Figure S3: Identification of lung cell types using single cell RNA sequencing of newborn human lung. t-distributed Stochastic Neighbor Embedding (tSNE) analysis of cells leads to assignment of cell types to distinct tSNE clusters. Visualization of distinct cell clusters in tSNE plot from donor 1 (Full Term, born at 38 weeks of gestation), run 1 (A), run 2 (B), donor 2 (Pre-Term, born at 31 weeks of gestation), run 1 (C), and run 2 (D).

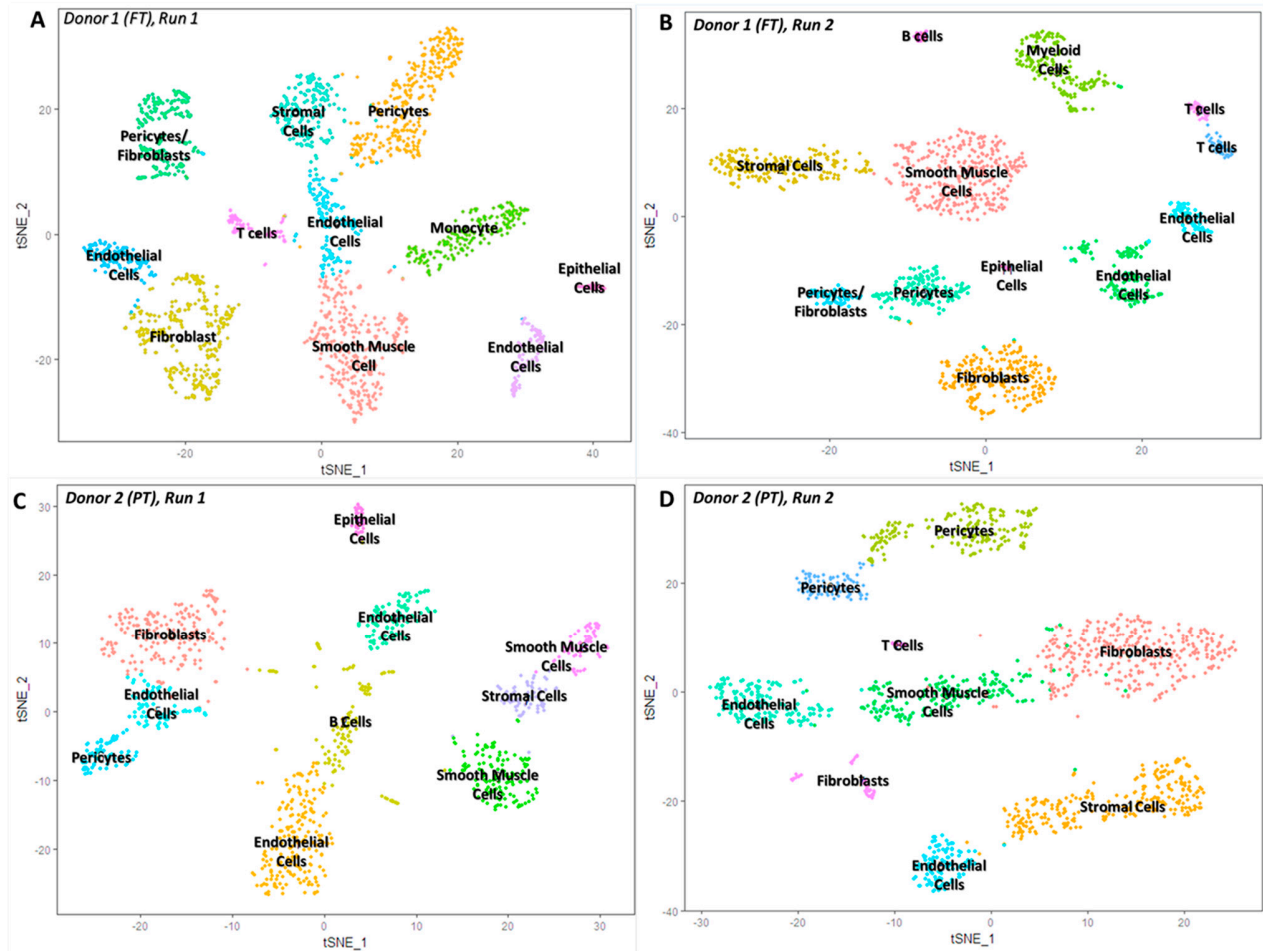

Figure S4 Identification of mouse lung cell types from Dropseq analysis of mouse lung. (A) Expression of known cell type markers in tSNE plot of cells. (B) The assignment of cell clusters to four major cell types, including endothelial cells, mesenchymal cells, immune cells, and epithelial cells. (C) Genes expression patterns of select markers of individual mouse cell clusters.

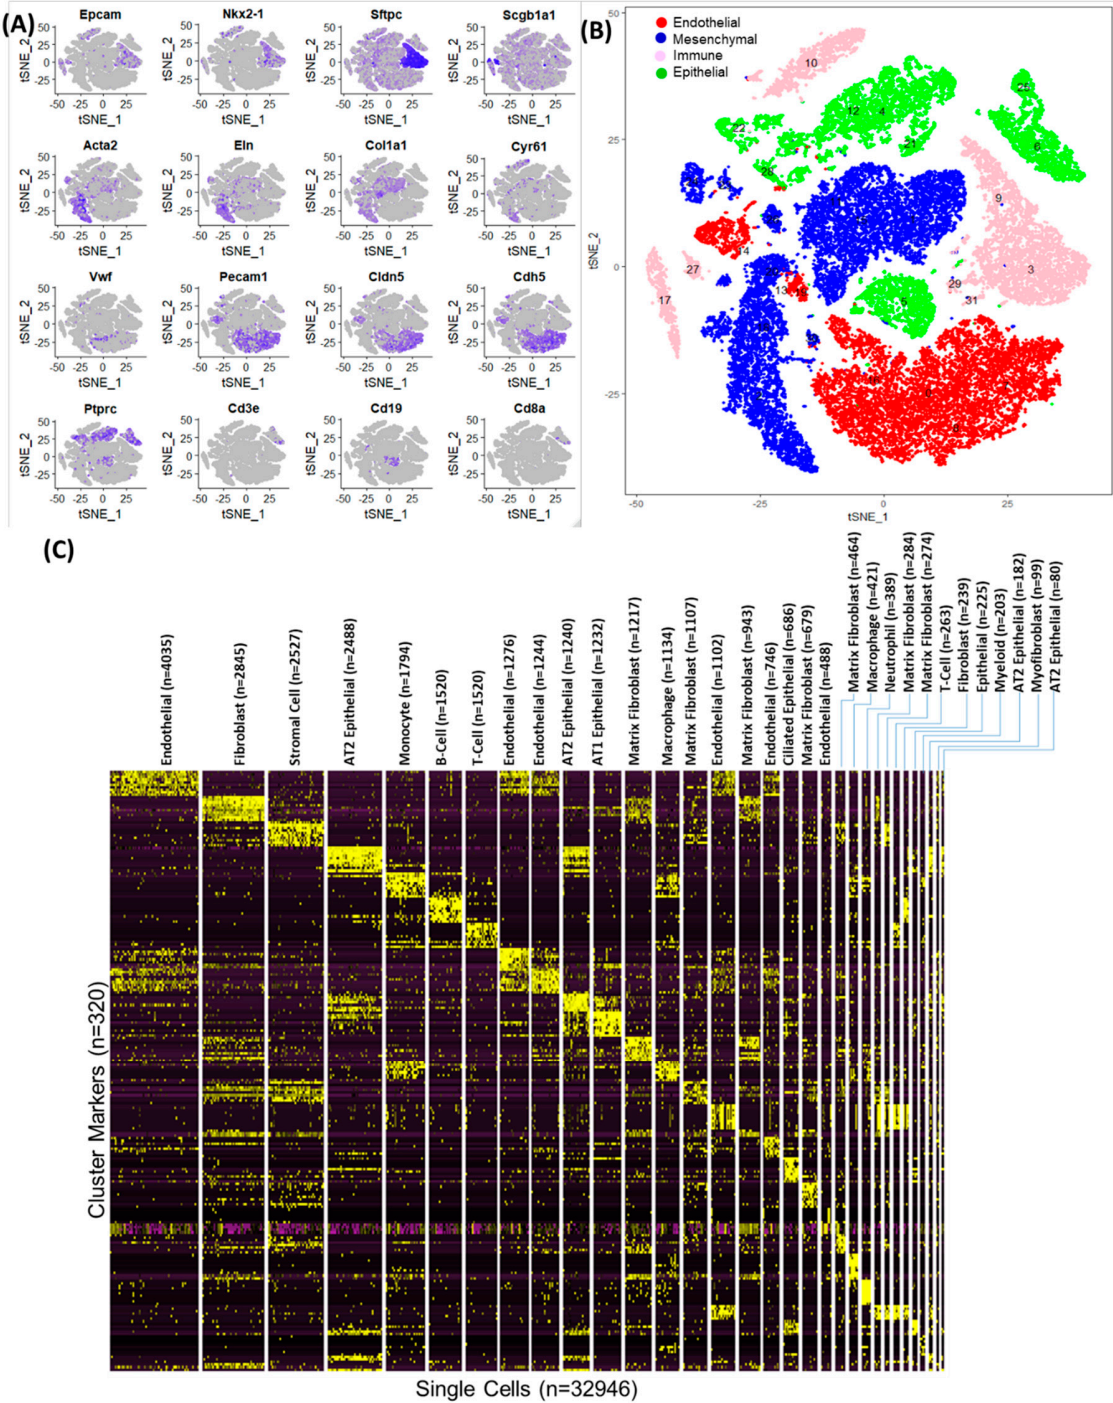

Figure S5. Relationship among the stages of lung development in human and mouse, focusing on the timeframe during which the lungs originated that were used to derive the single cell sequence data. The time points sampled in the transcriptomic analyses are indicated by arrows in the middle.

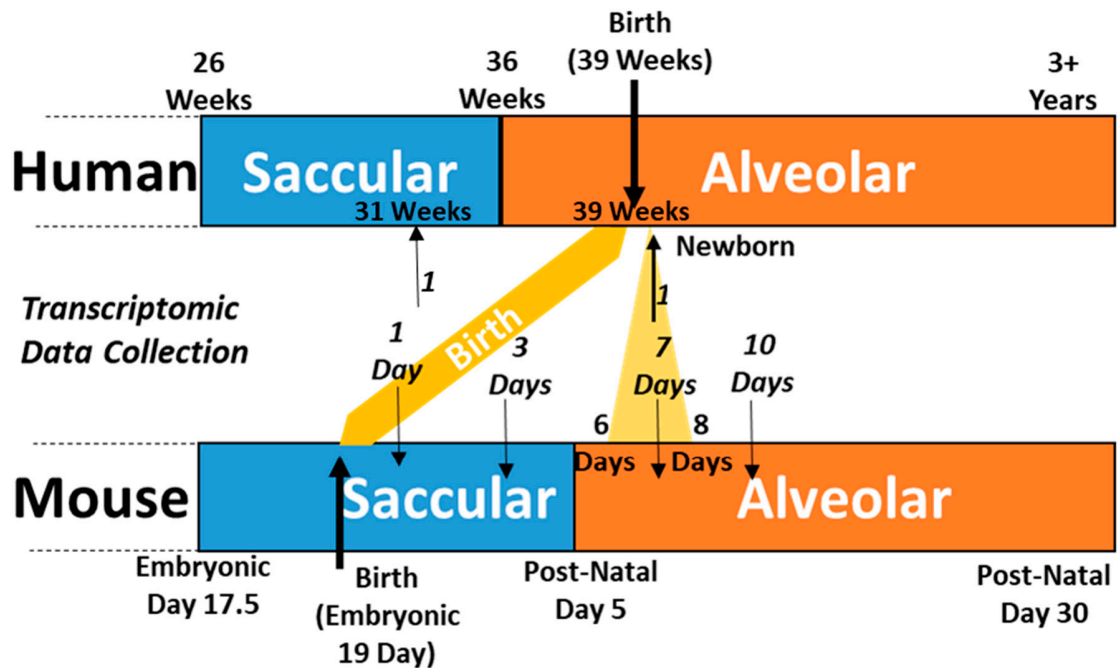

Figure S6: Presence of immune cells in newborn human lungs. (a) Expression of known immune cell markers *PTPRC* (*CD45*) and *HLA-DRA* in tSNE plot of cells. (b) Proportion of immune cell populations among all lung cells observed by sorting in four lungs obtained from one-day old donors, and (c) distributions of different immune cell populations in the same lung samples, as assessed by flow cytometry.

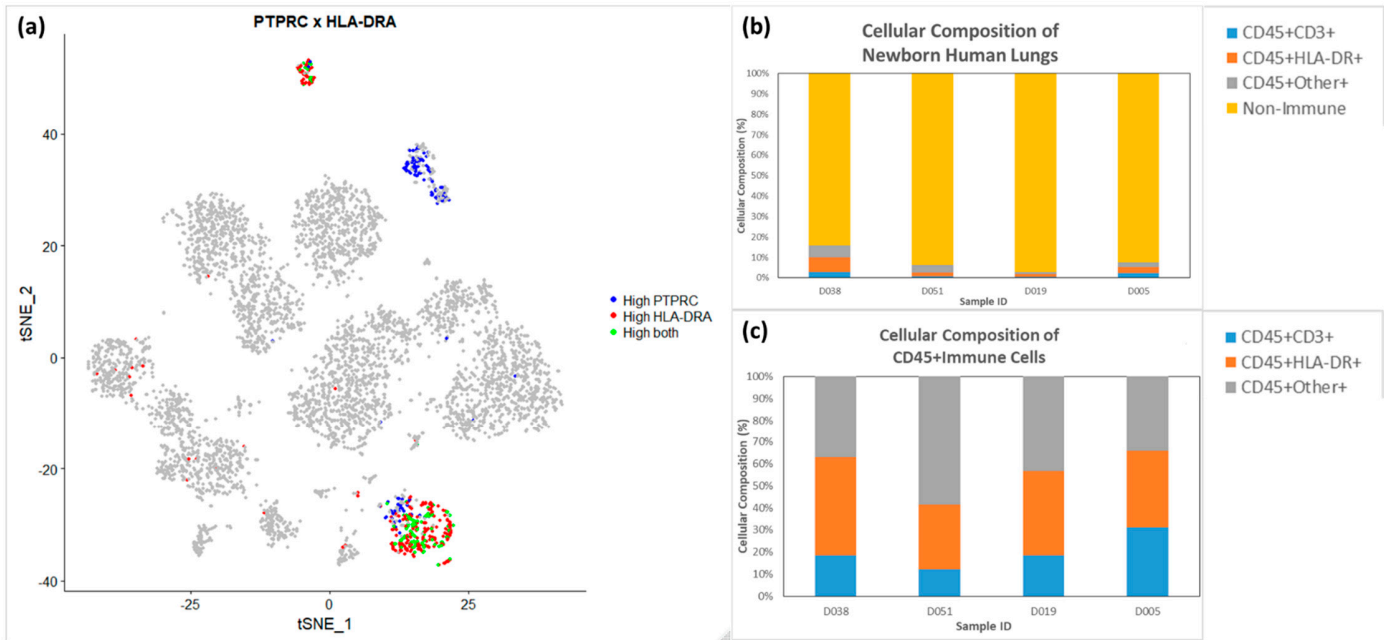

Figure S7: Differential expression analysis of developmentally early and later matrix fibroblasts identified 210 genes as differentially expressed. (a) Heatmap of 210 differentially expressed genes, where the rows indicate the genes, and columns indicate the individual cells. High expression is shown by yellow, and low expression is shown by purple. (b) Pathway analysis of 187 genes upregulated in immature fibroblasts identified 15 pathways significantly associated with those cells. Y-axis indicates the pathway names, and x-axis indicates  $-\log(p\text{-values})$ .  $-\log(p\text{-values})$  greater than 1.3 indicates significance.

(a)

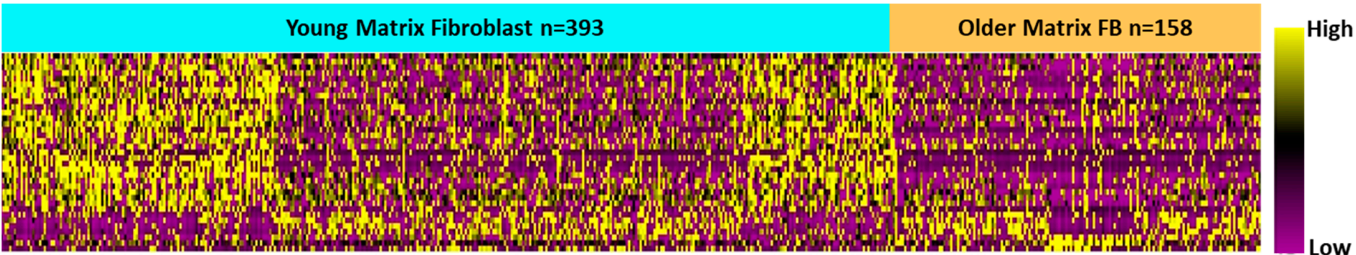

(b)

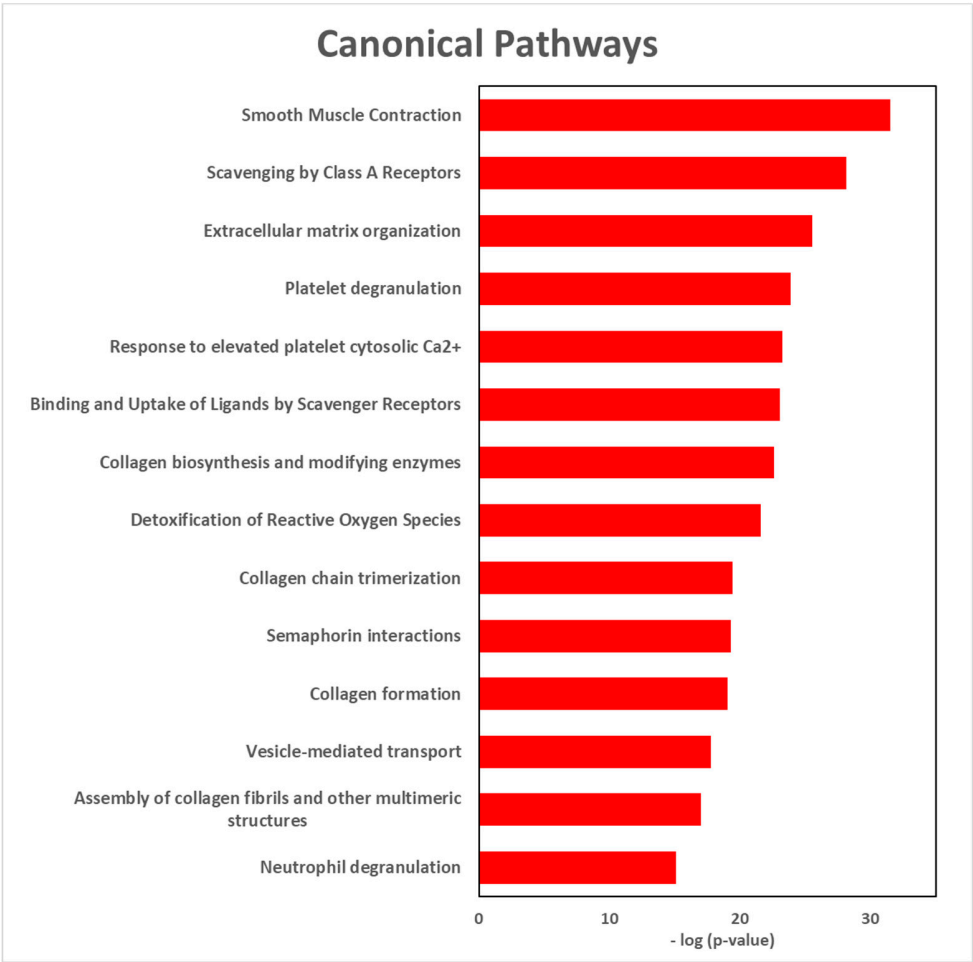

Figure S8: Location of cells expressing *HES1*. (A) Distribution of the estimated ages of the human cells among the different cell types, derived from post -natal age (PND) of 100 nearest mouse cells to each of the human cells. Shown here are proportion of cells of individual human cell types at each stage of maturity (represented by each circular ring) defined in terms of estimated post-natal day age of mouse. (B) Expression of younger matrix fibroblast marker *HES1* in tSNE plot of cells. (C-F) tSNE plots showing coexpression of *HES1* with known matrix fibroblast markers (*COL6A1* and *TCF1*) serving as positive controls, and epithelial or endothelial cell markers (*CDH1* and *PECAM1*) serving as negative controls. (G) Fluorescent in situ hybridization (FISH) combined with immunofluorescence of Immature Matrix Fibroblast marker *HES1* (red), Non-Mesenchymal Cell Markers, *PECAM1* or *CDH1* (cyan), and Mesenchymal Cell Markers *COL6A3* or *TCF21* (green) on newborn human lung sections from a donor lung of 1 day of age. Pink arrows indicated the presence of immature matrix fibroblasts shown by co-localization of *HES1* (red) and Mesenchymal Cell Markers *COL6A3* or *TCF21* (green) while yellow arrows indicate non *HES1* expressing cells. The scale bar is 50um.

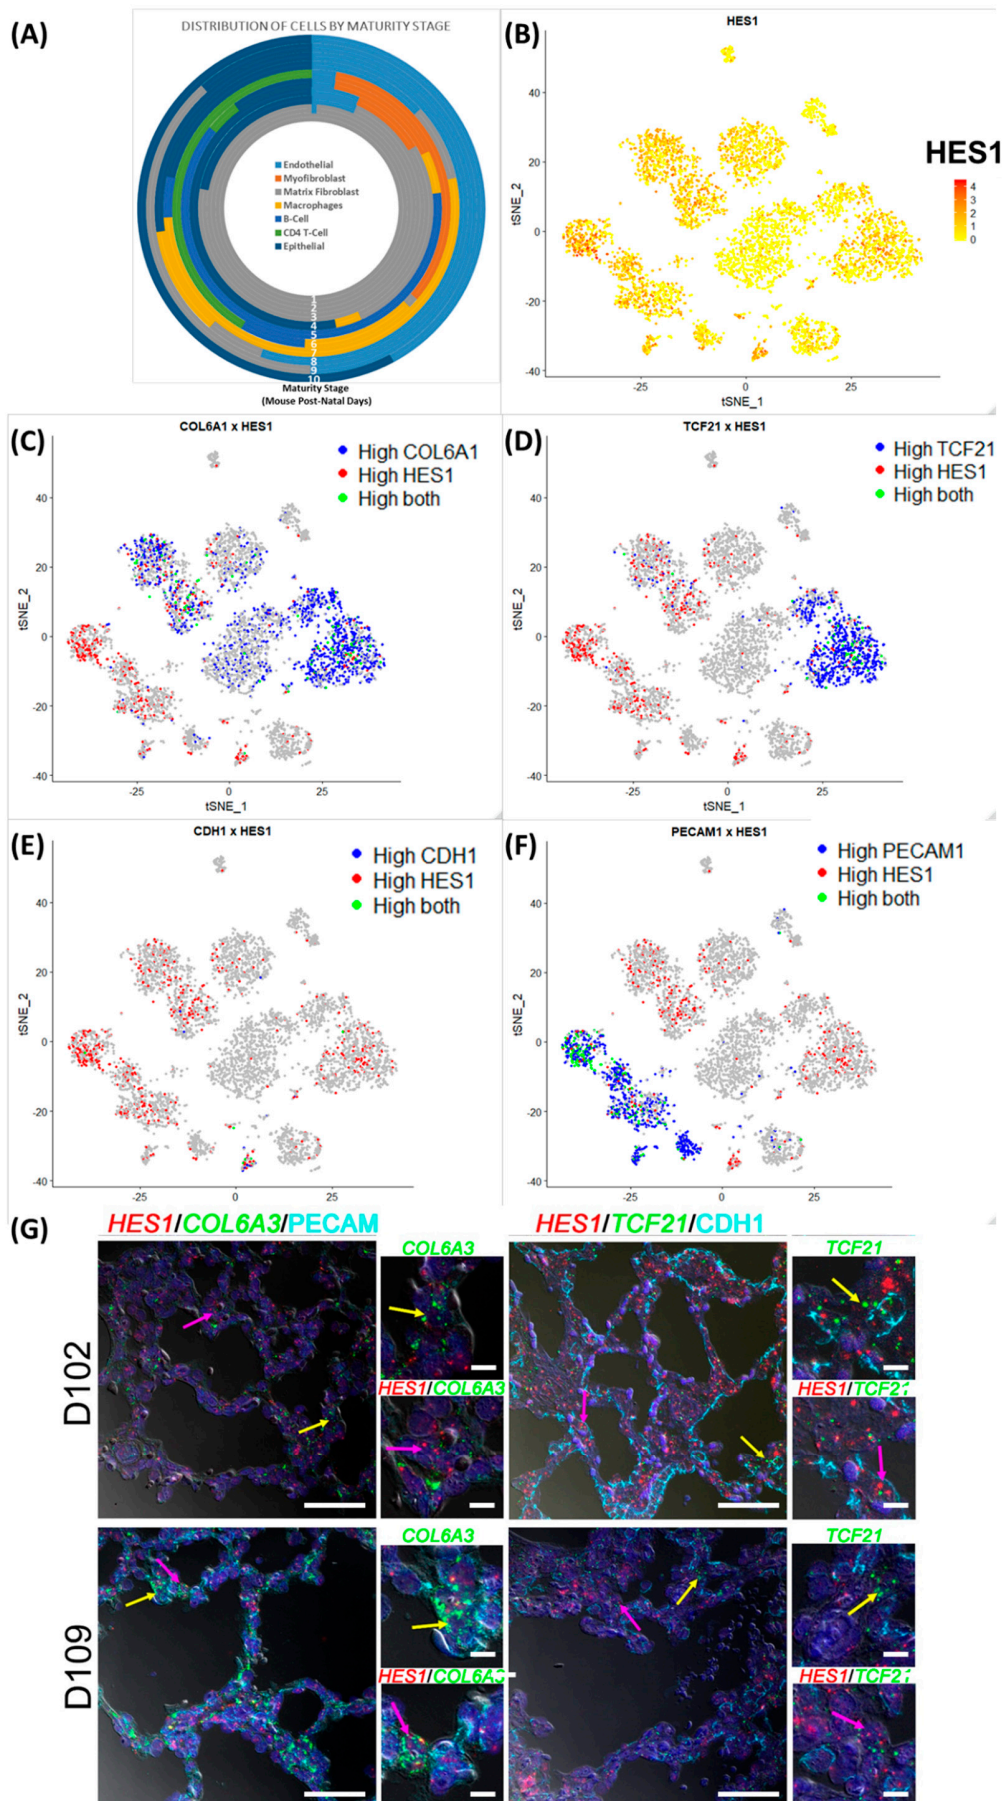

Figure S9: Location of cells expressing *HES1* in Human and Mouse cells. (A) Expression of younger matrix fibroblast marker *HES1* in tSNE plot of human and mouse cells. (B-E) tSNE plots showing coexpression of *HES1* with known matrix fibroblast markers (*COL6A1* and *TCF21*) serving as positive controls, and epithelial or endothelial cell markers (*CDH1* and *PECAM1*) serving as negative controls.

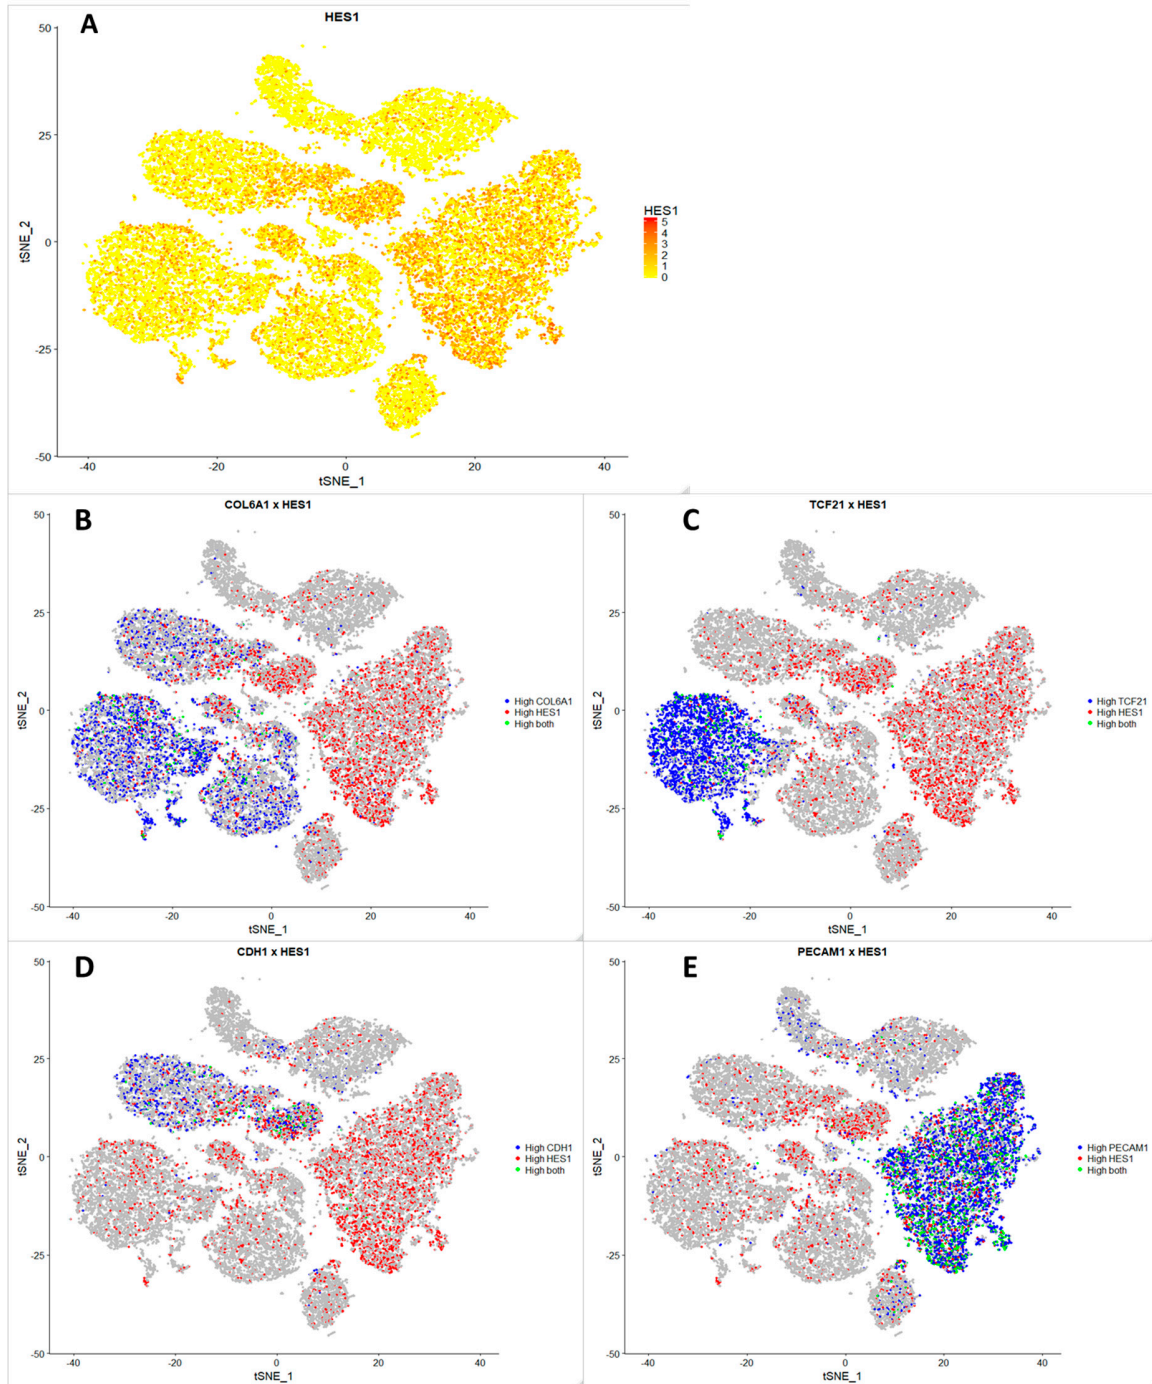

Figure S10. Histological analysis of the lung tissues from the two human samples studied indicated histopathological lungs. Shown here are representative hematoxylin and eosin (H&E) histochemical stain images of the lung from donor 1 (Full Term, born at 38 weeks of gestation; A), and Histology of the lung from donor 2 (Pre-Term, born at 31 weeks of gestation; B). The scale bar is 1mm.

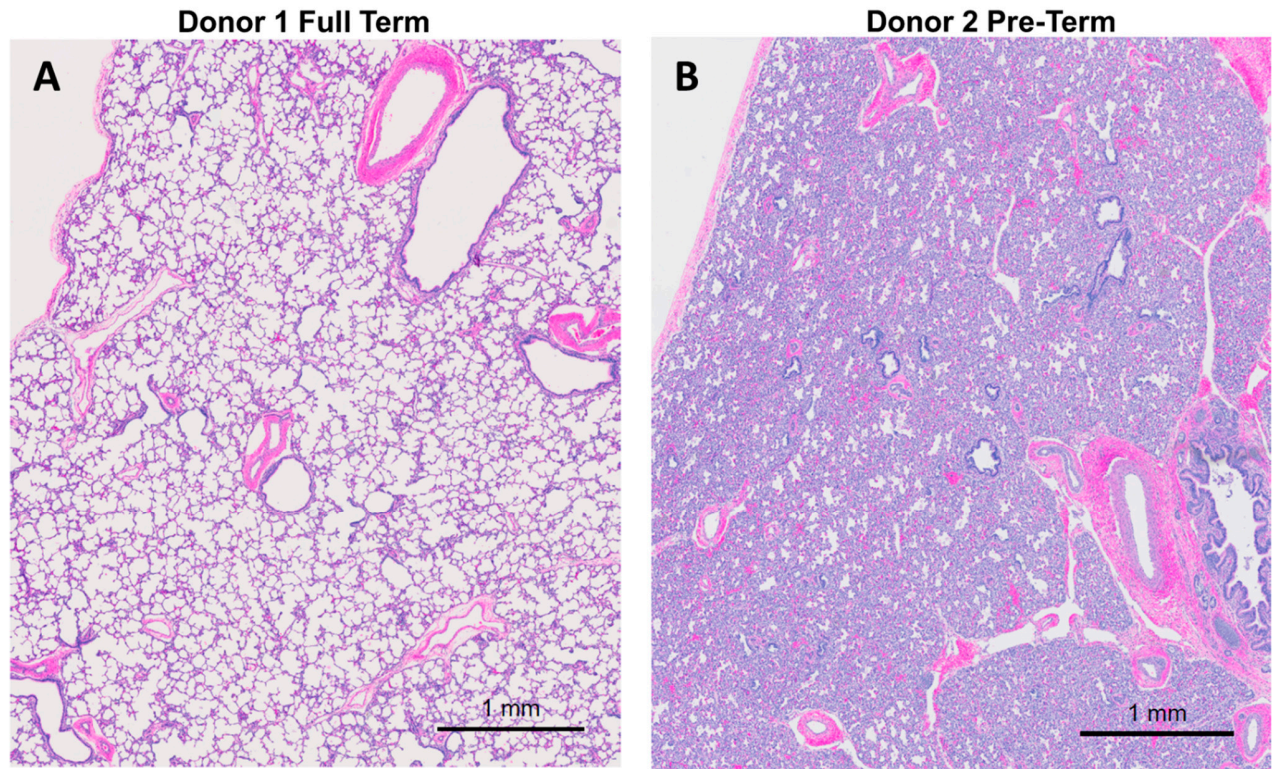

Supplement: s1 [file s1]
